# Supplementary material for: Tetrahydroxanthohumol, a xanthohumol derivative, attenuates high-fat diet-induced hepatic steatosis by antagonizing PPARγ
Source: eLife journal article supplement (doi:10.7554/elife.66398), 2021-06-14

**A. Directed ambulatory locomotion per light-dark cycle**

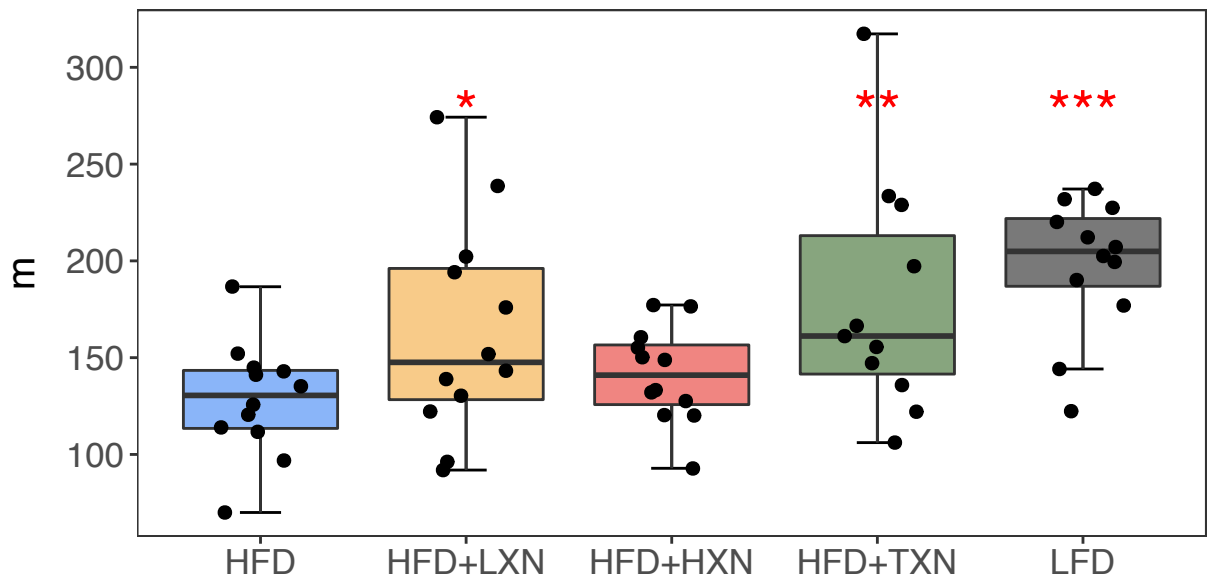

**B. Fine movements per light-dark cycle grooming, scratching, etc**

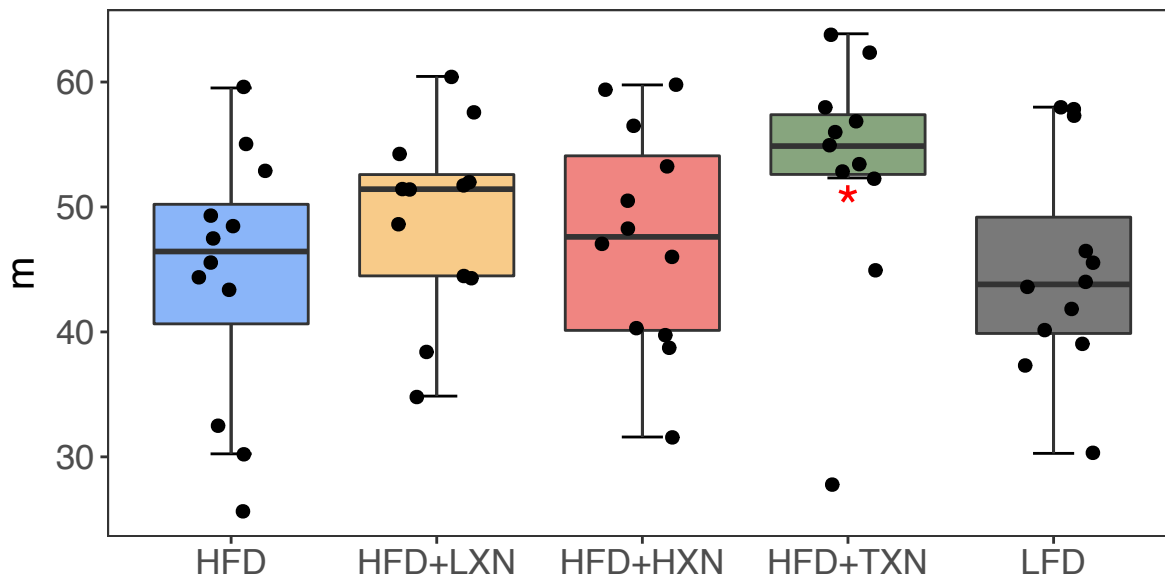

**C. Food intake frequency per light-dark cycle**

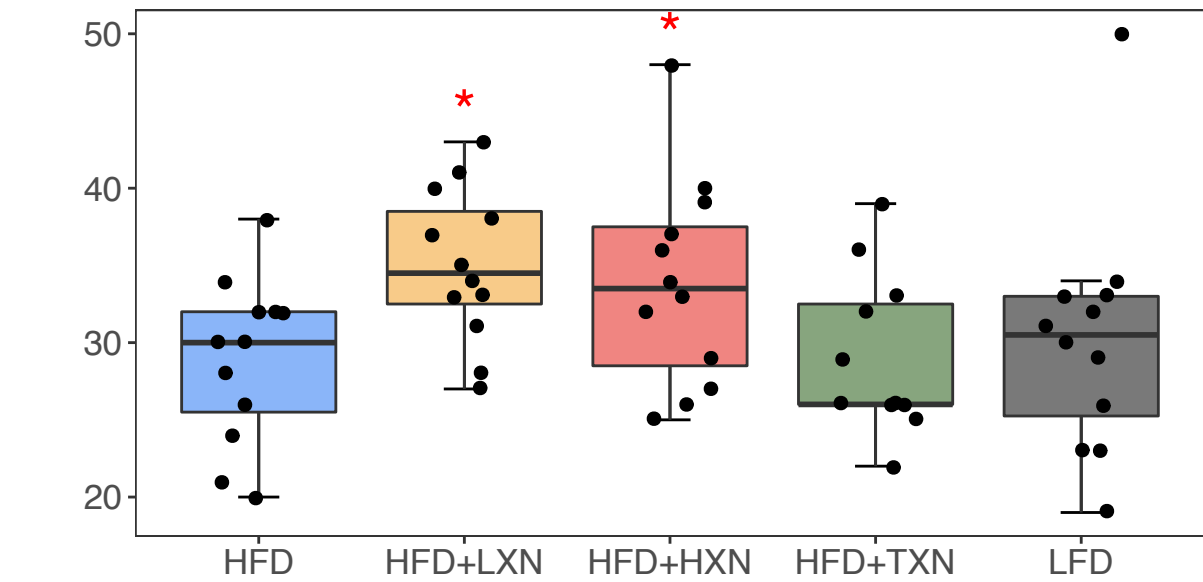

**A-1 LFD**

R = 0.263 P = 0.41  
Intercept = 0.4 Slope = 0.00055

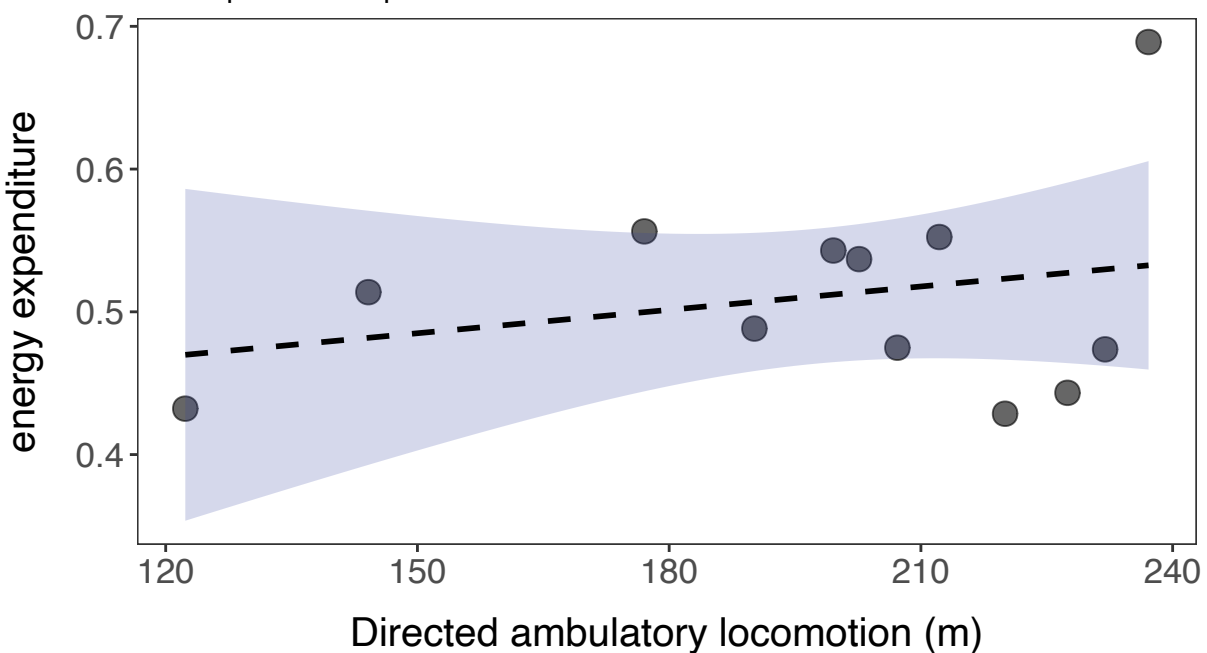

**B-1 LFD**

R = 0.562 P = 0.057  
Intercept = 0.3 Slope = 0.0047

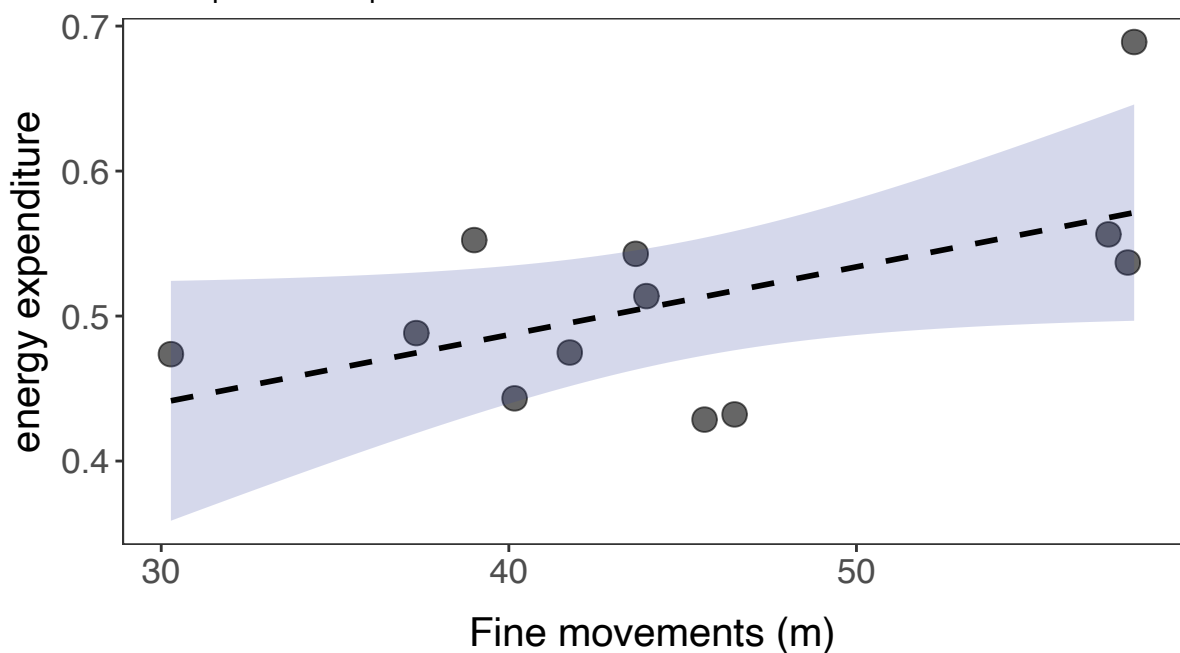

**C-1 LFD**

R = 0.00664 P = 0.98  
Intercept = 200 Slope = 0.03

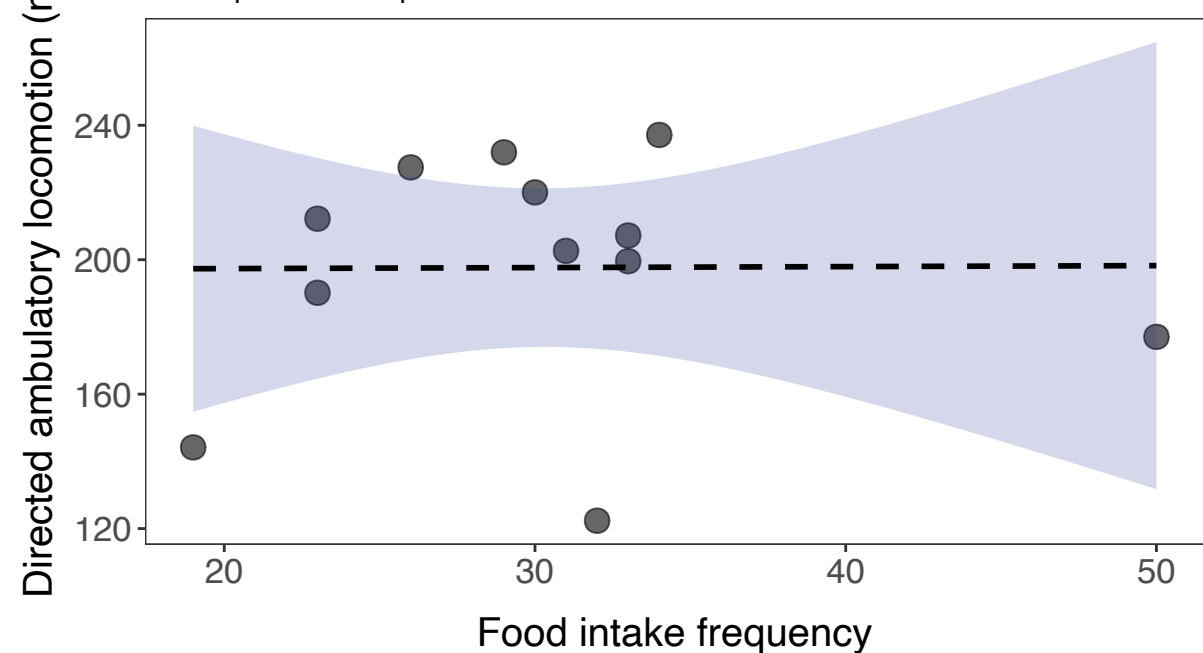

**A-2 HFD**

R = 0.686 P = 0.014  
Intercept = 0.69 Slope = -0.0011

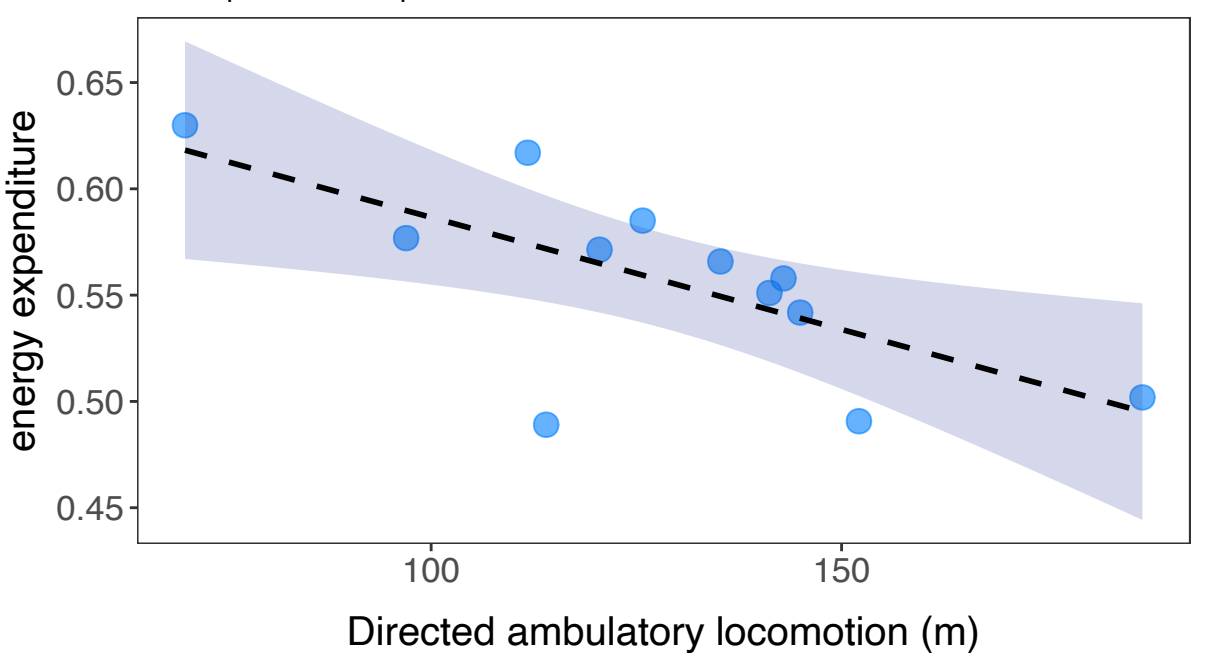

**B-2 HFD**

R = 0.133 P = 0.68  
Intercept = 0.58 Slope = -0.00059

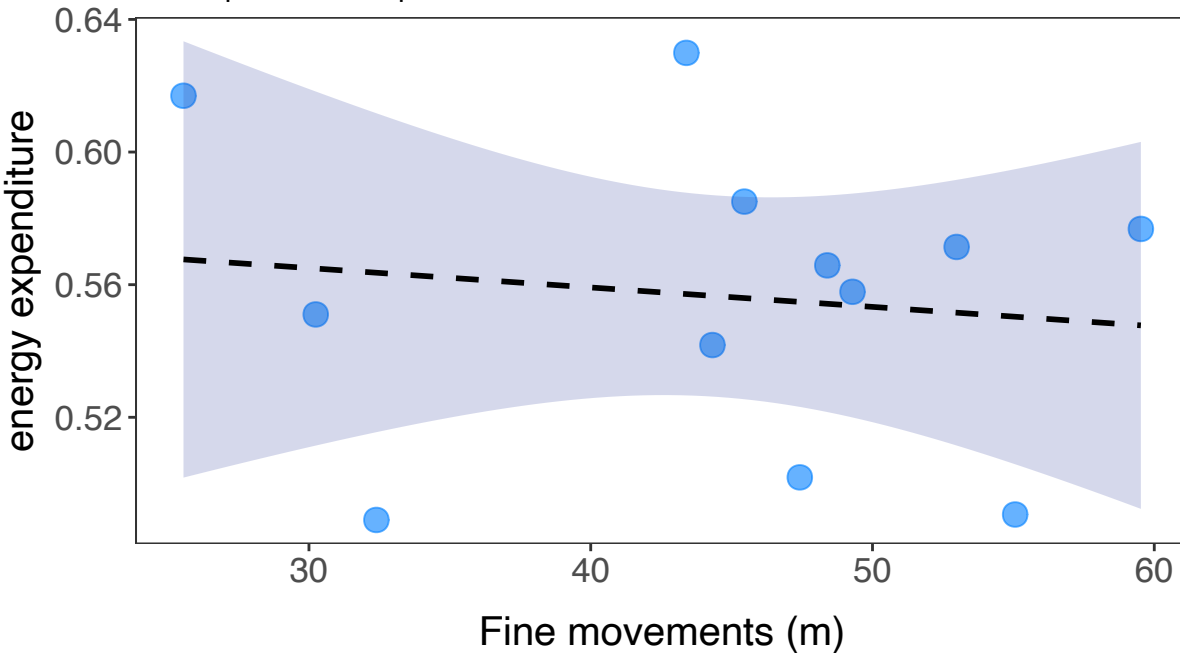

**C-2 HFD**

R = 0.565 P = 0.056  
Intercept = 38 Slope = 3.1

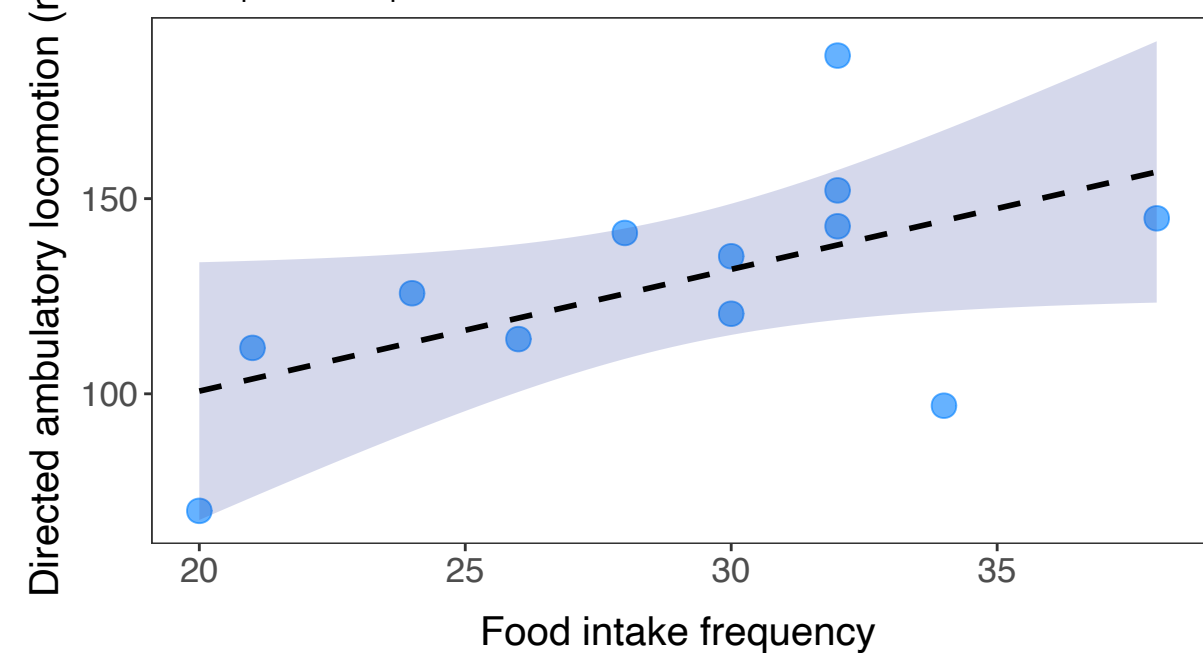

**A-3 HFD+LXN**

R = 0.554 P = 0.062  
Intercept = 0.64 Slope = -0.00053

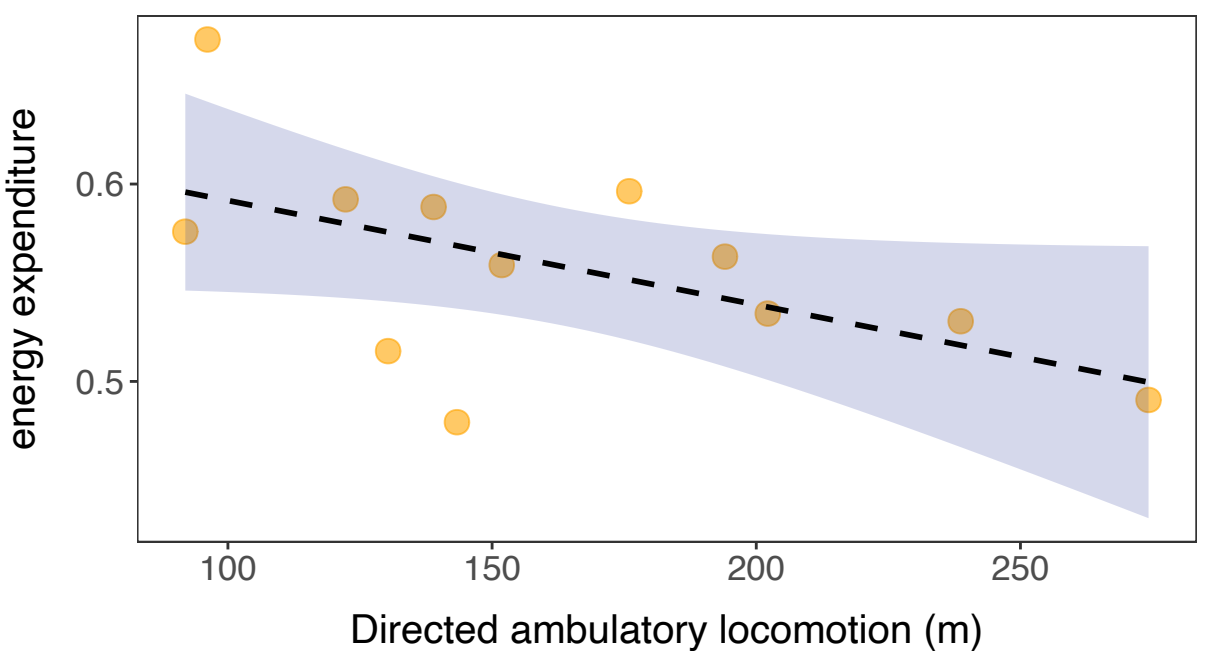

**B-3 HFD+LXN**

R = 0.522 P = 0.082  
Intercept = 0.38 Slope = 0.0037

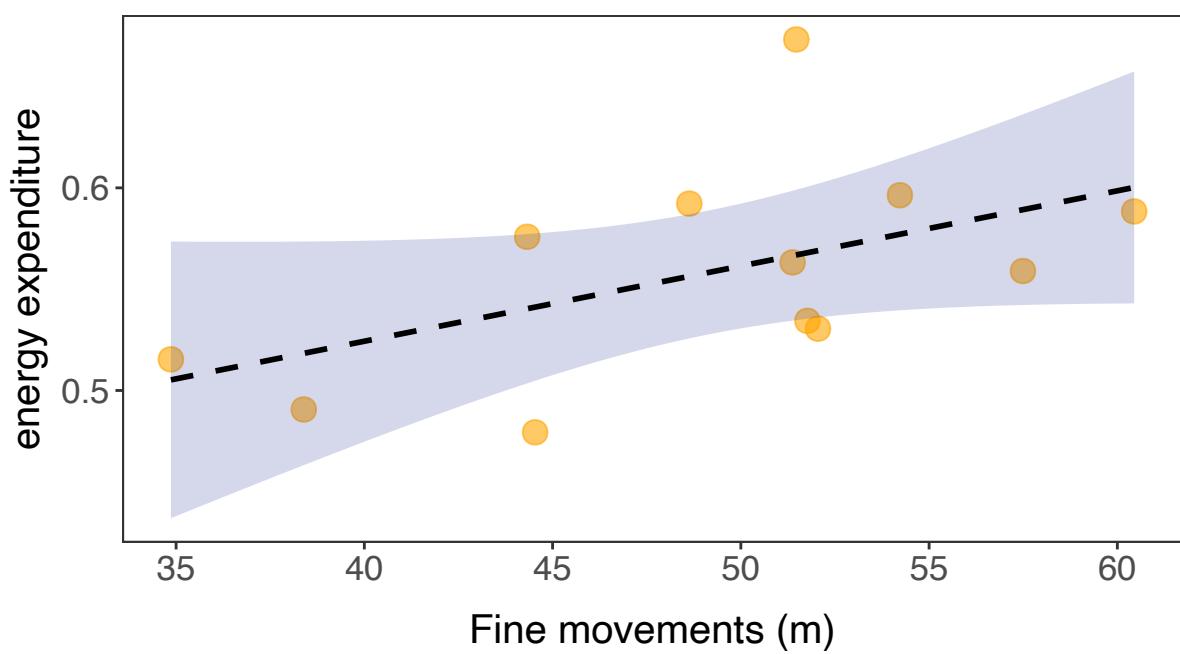

**C-3 HFD+LXN**

R = 0.732 P = 0.0068  
Intercept = -120 Slope = 8.1

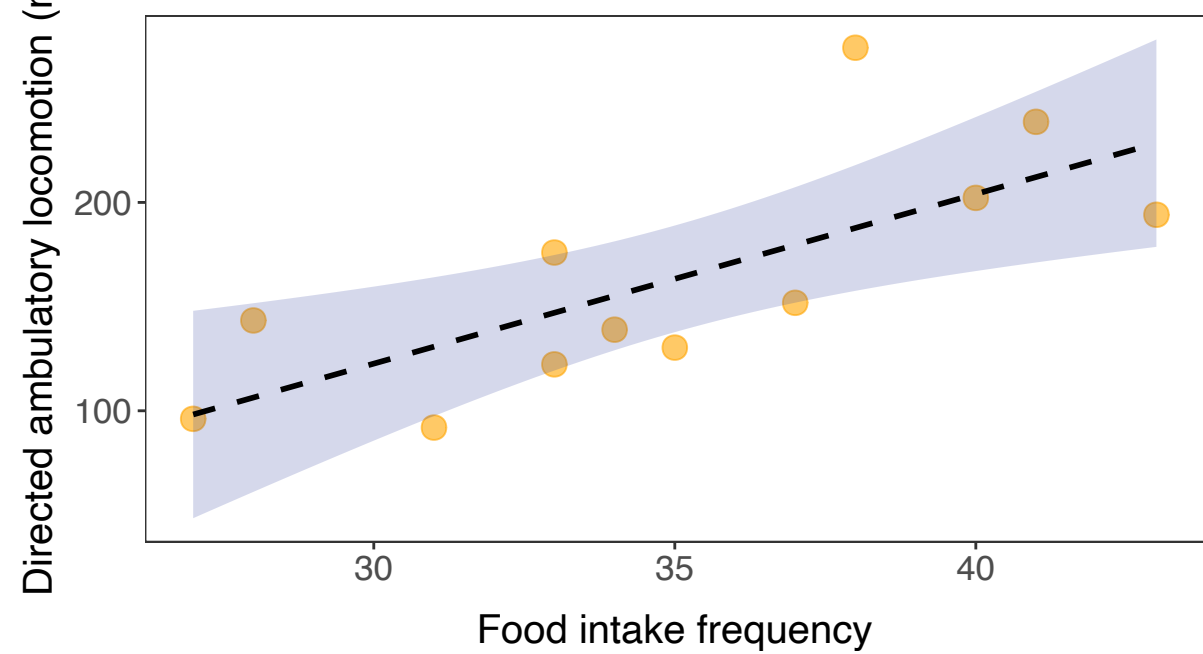

**A-4 HFD+HXN**

R = 0.45 P = 0.14  
Intercept = 0.6 Slope = -0.00067

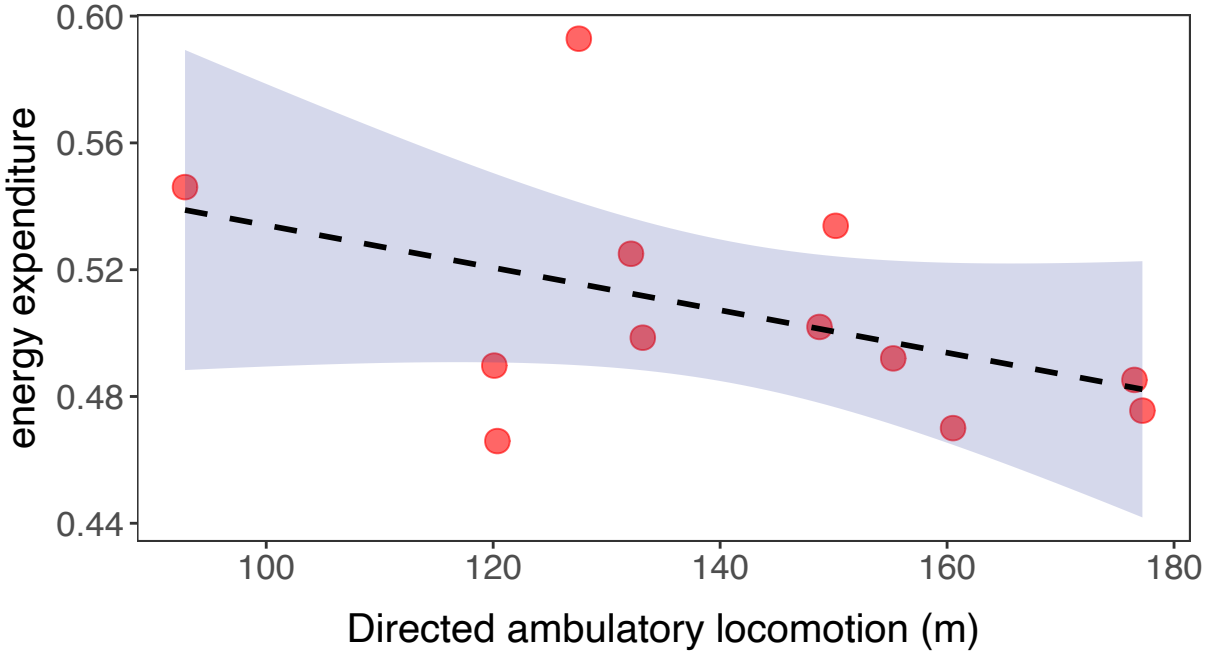

**B-4 HFD+HXN**

R = 0.0289 P = 0.93  
Intercept = 0.5 Slope = 0.00012

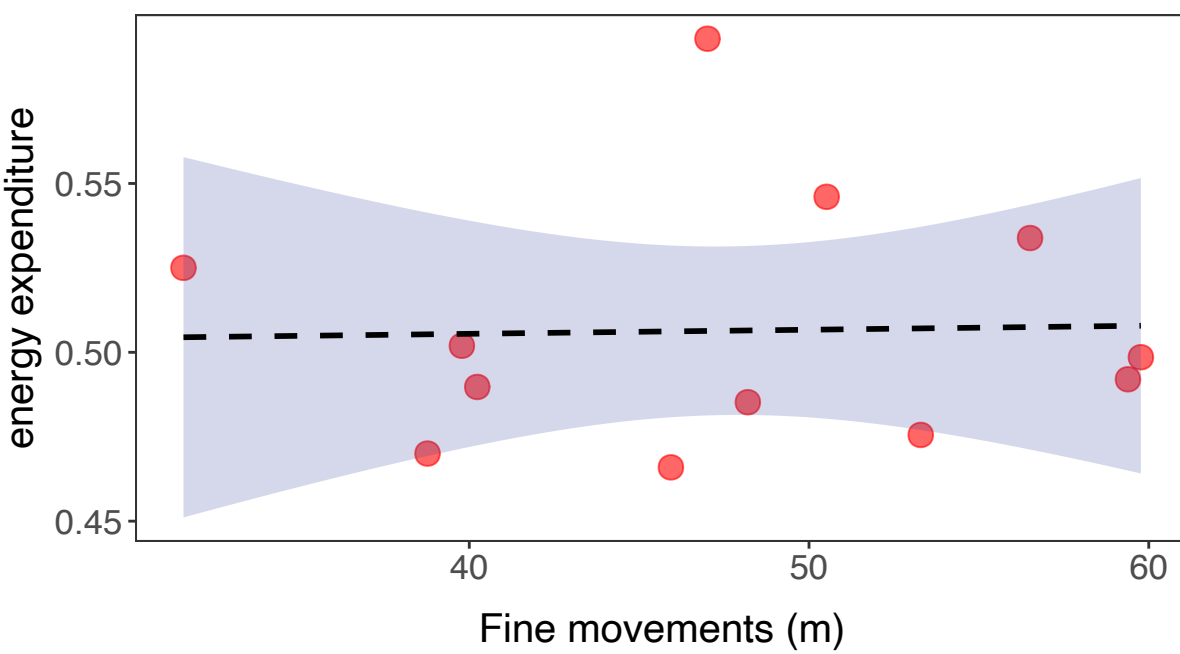

**C-4 HFD+HXN**

R = 0.0762 P = 0.81  
Intercept = 130 Slope = 0.28

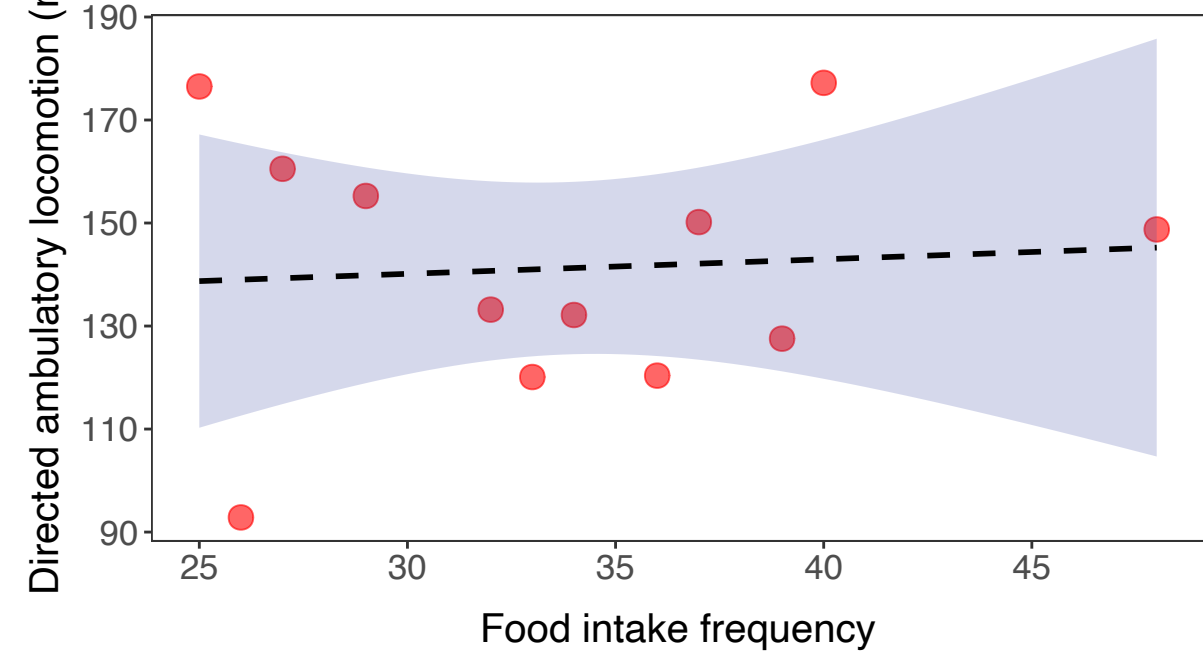

**A-5 HFD+TXN**

R = 0.188 P = 0.58  
Intercept = 0.46 Slope = 0.00015

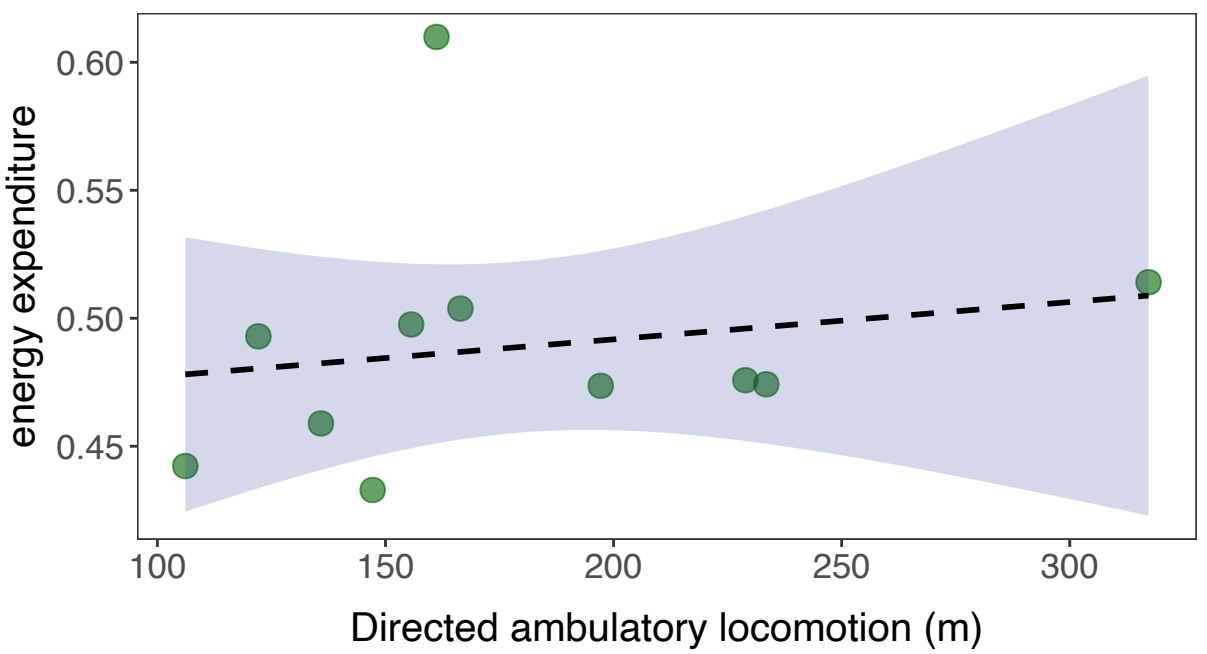

**B-5 HFD+TXN**

R = 0.474 P = 0.14  
Intercept = 0.37 Slope = 0.0023

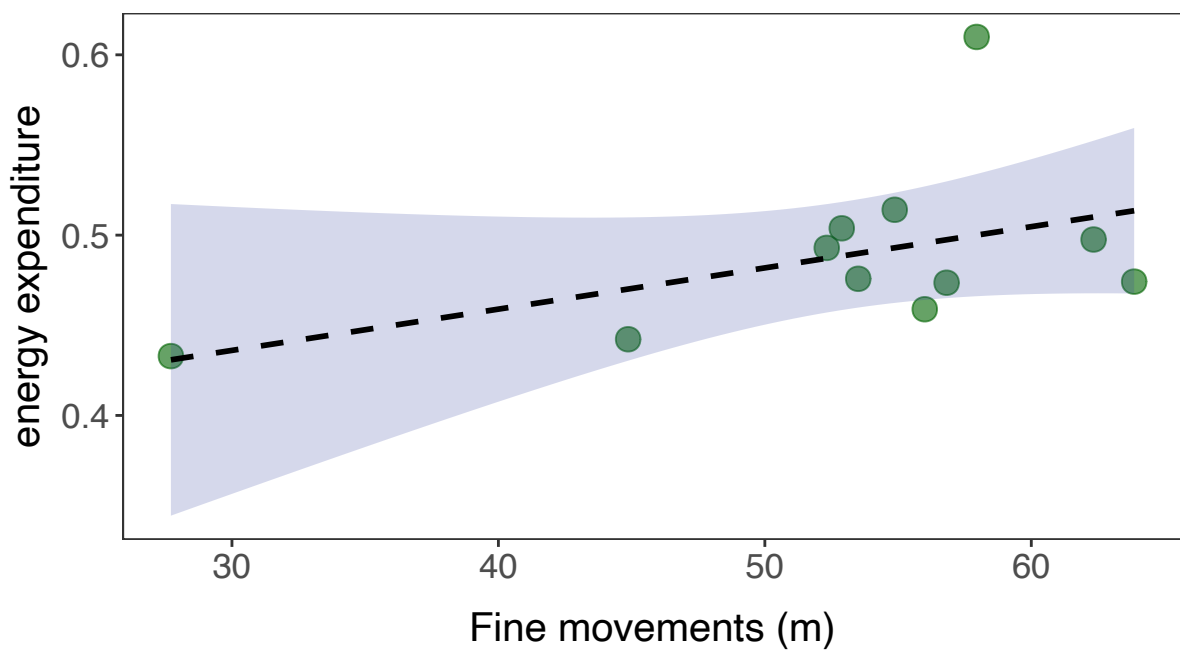

**C-5 HFD+TXN**

R = 0.172 P = 0.61  
Intercept = 120 Slope = 2

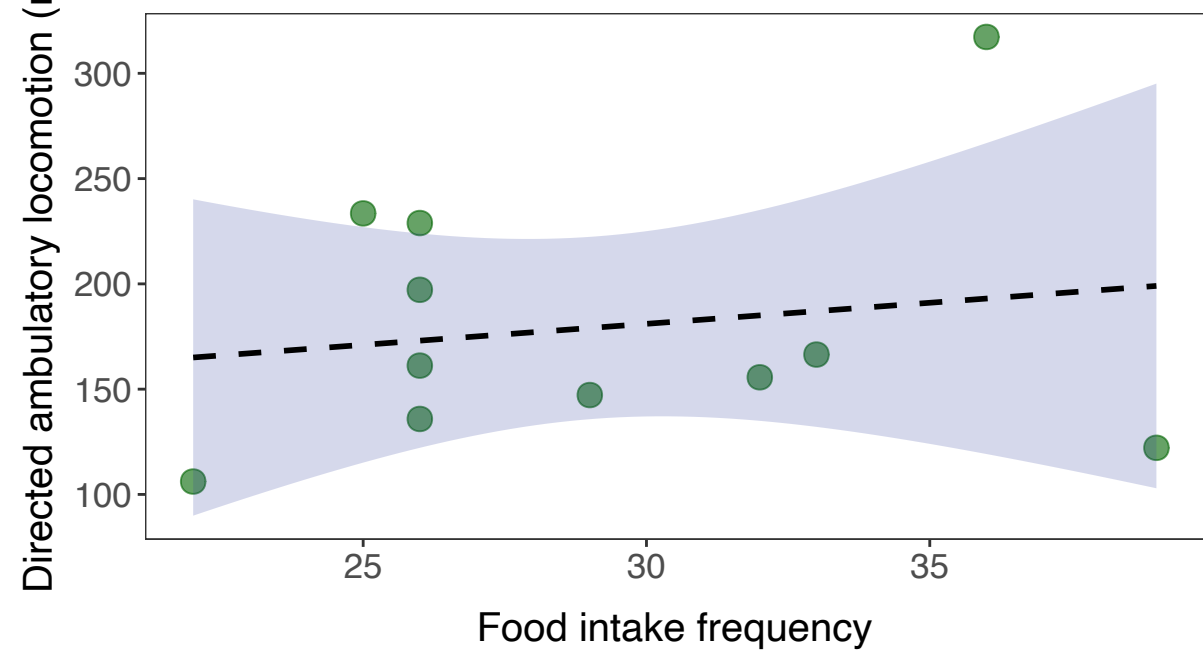

Supplement: fig4-data1 [file Figure4.pdf › Figure4/Figure4.pdf]
