# Supplementary material for: Tetrahydroxanthohumol, a xanthohumol derivative, attenuates high-fat diet-induced hepatic steatosis by antagonizing PPARγ
Source: eLife journal article supplement (doi:10.7554/elife.66398), 2021-06-14
Supplement: fig2-data1 [file 2019TXN_repeated_measures_YZGB.xlsx]

## Sheet: weekly_data (2)
Treatment	Date	ID	Treatment	Weight	Weight_gain_percent	Food_Intake_weekly	Calories_weekly	Week			HFD			HFD+LXN			HFD+HXN			HFD+TXN			LFD
HFD	2019-02-04	13	0	24.3	0	21.8	111.7	0
HFD	2019-02-12	13	0	25.7	5.76	16.3	83.5	1			Mean	SEM	S	Mean	SEM	S	Mean	SEM	S	Mean	SEM	S	Mean	SEM	S
HFD	2019-02-19	13	0	26.9	10.7	18.3	93.7	2	Overall	Weight	39.24	0.8	a	36.71	0.8	b	39.17	0.8	a	33.25	0.84	c	31.44	0.8	c
HFD	2019-02-26	13	0	29.4	20.99	20.8	106.54	3		Weight_gain_percent	54.7	2.7	a	45.2	2.7	b	49.7	2.7	ab	31	2.8	c	22.2	2.7	d
HFD	2019-03-05	13	0	30.3	24.69	20.2	103.46	4		Food_Intake_weekly	20.34	0.37	b	18.56	0.37	c	20.28	0.37	b	19.69	0.39	b	24.04	0.37	a
HFD	2019-03-12	13	0	31.5	29.63	20.6	105.51	5		Calories_weekly	104.2	1.6	a	95.1	1.6	b	103.9	1.6	a	100.9	1.7	a	85.2	1.6	c
HFD	2019-03-19	13	0	32.6	34.2	19.5	99.88	6
HFD	2019-03-26	13	0	34.5	42	19.7	100.9	7				Significant differences are designated by different superscript within rows
HFD	2019-04-02	13	0	37.4	53.9	20.8	106.54	8
HFD	2019-04-09	13	0	36.9	51.85	12.8	65.56	9
HFD	2019-04-16	13	0	37.4	53.91	14.5	74.27	10
HFD	2019-04-23	13	0	39.9	64.2	20.8	106.5	11
HFD	2019-04-30	13	0	41.7	71.6	21	107.56	12
HFD	2019-05-07	13	0	44	81.07	20.7	106	13
HFD	2019-05-14	13	0	46.5	91.36	21	107.56	14
HFD	2019-05-21	13	0	47.6	95.88	20.5	105	15
HFD	2019-05-28	13	0	48.9	101.23	20	102.44	16
HFD	2019-02-04	14	0	23.8	0	26.41	135.3	0
HFD	2019-02-12	14	0	28.2	18.49	25.4	130.1	1
HFD	2019-02-19	14	0	29.9	25.63	23	117.8	2
HFD	2019-02-26	14	0	32.2	35.29	22.5	115.24	3
HFD	2019-03-05	14	0	33.3	39.92	21.9	112.17	4
HFD	2019-03-12	14	0	35.8	50.42	22.8	116.78	5
HFD	2019-03-19	14	0	38.5	61.8	21.8	111.66	6
HFD	2019-03-26	14	0	40.3	69.3	21.5	110.12	7
HFD	2019-04-02	14	0	43.3	81.9	23.9	122.42	8
HFD	2019-04-09	14	0	45.3	90.34	18.2	93.22	9
HFD	2019-04-16	14	0	47.2	98.32	17	87.07	10
HFD	2019-04-23	14	0	49.9	109.66	22.6	115.8	11
HFD	2019-04-30	14	0	50.5	112.18	23.6	120.88	12
HFD	2019-05-07	14	0	51.8	117.65	22.7	116.3	13
HFD	2019-05-14	14	0	51.6	116.81	21.7	111.15	14
HFD	2019-05-21	14	0	51.9	118.07	22.9	117.29	15
HFD	2019-05-28	14	0	52.2	119.33	21.8	111.66	16
HFD	2019-02-04	15	0	25.4	0	24.46	125.3	0
HFD	2019-02-12	15	0	27.4	7.87	17	87.1	1
HFD	2019-02-19	15	0	29.7	16.93	18.7	95.8	2
HFD	2019-02-26	15	0	32.1	26.38	19.6	100.39	3
HFD	2019-03-05	15	0	34.8	37.01	19.6	100.39	4
HFD	2019-03-12	15	0	35.7	40.55	18.1	92.71	5
HFD	2019-03-19	15	0	38.8	52.8	20.5	105	6
HFD	2019-03-26	15	0	41.6	63.8	19.9	101.93	7
HFD	2019-04-02	15	0	45	77.2	19.9	101.93	8
HFD	2019-04-09	15	0	45.6	79.53	18.7	95.78	9
HFD	2019-04-16	15	0	47.2	85.83	19	97.32	10
HFD	2019-04-23	15	0	47.6	87.4	17.6	90.1	11
HFD	2019-04-30	15	0	48.9	92.52	18.2	93.22	12
HFD	2019-05-07	15	0	50.2	97.64	18.1	92.7	13
HFD	2019-05-14	15	0	50.3	98.03	18.1	92.71	14
HFD	2019-05-21	15	0	50.6	99.21	18.4	94.24	15
HFD	2019-05-28	15	0	51.6	103.15	18.9	96.81	16
HFD	2019-02-04	16	0	27.5	0	24.73	126.7	0
HFD	2019-02-12	16	0	29.1	5.82	19.3	98.9	1
HFD	2019-02-19	16	0	31.8	15.64	22	112.7	2
HFD	2019-02-26	16	0	33.8	22.91	20.1	102.95	3
HFD	2019-03-05	16	0	34.7	26.18	19.4	99.37	4
HFD	2019-03-12	16	0	36	30.91	18.9	96.81	5
HFD	2019-03-19	16	0	37.8	37.5	19.4	99.37	6
HFD	2019-03-26	16	0	38.8	41.1	17.8	91.17	7
HFD	2019-04-02	16	0	41.5	50.9	19.5	99.88	8
HFD	2019-04-09	16	0	43.5	58.18	20.3	103.98	9
HFD	2019-04-16	16	0	44.6	62.18	18.4	94.24	10
HFD	2019-04-23	16	0	46.5	69.09	20.3	104	11
HFD	2019-04-30	16	0	49.1	78.55	21.4	109.61	12
HFD	2019-05-07	16	0	51	85.45	19.5	99.9	13
HFD	2019-05-14	16	0	52.2	89.82	20.1	102.95	14
HFD	2019-05-21	16	0	52.2	89.82	19.9	101.93	15
HFD	2019-05-28	16	0	52.9	92.36	23.6	120.88	16
HFD	2019-02-04	17	0	24.5	0	20.16	103.3	0
HFD	2019-02-12	17	0	28.1	14.69	18.7	95.8	1
HFD	2019-02-19	17	0	29	18.37	18.4	94.2	2
HFD	2019-02-26	17	0	31	26.53	19.1	97.83	3
HFD	2019-03-05	17	0	32.4	32.24	18.6	95.27	4
HFD	2019-03-12	17	0	34.1	39.18	19.9	101.93	5
HFD	2019-03-19	17	0	33.1	35.1	16.9	86.56	6
HFD	2019-03-26	17	0	32	30.6	15.8	80.93	7
HFD	2019-04-02	17	0	34.5	40.8	19.8	101.42	8
HFD	2019-04-09	17	0	36.1	47.35	18.7	95.78	9
HFD	2019-04-16	17	0	36.4	48.57	18.9	96.81	10
HFD	2019-04-23	17	0	38	55.1	18.4	94.2	11
HFD	2019-04-30	17	0	39.7	62.04	20.3	103.98	12
HFD	2019-05-07	17	0	41	67.35	19.3	98.9	13
HFD	2019-05-14	17	0	43	75.51	21.1	108.07	14
HFD	2019-05-21	17	0	44.6	82.04	21	107.56	15
HFD	2019-05-28	17	0	46.5	89.8	22.8	116.78	16
HFD	2019-02-04	18	0	25.4	0	25.88	132.6	0
HFD	2019-02-12	18	0	27.2	7.09	15.6	79.9	1
HFD	2019-02-19	18	0	28.2	11.02	17.7	90.7	2
HFD	2019-02-26	18	0	29.8	17.32	18.7	95.78	3
HFD	2019-03-05	18	0	30.7	20.87	18.1	92.71	4
HFD	2019-03-12	18	0	32.8	29.13	20.4	104.49	5
HFD	2019-03-19	18	0	35.5	39.8	20.8	106.54	6
HFD	2019-03-26	18	0	38.1	50	21.4	109.61	7
HFD	2019-04-02	18	0	40.5	59.4	21	107.56	8
HFD	2019-04-09	18	0	42	65.35	20.8	106.54	9
HFD	2019-04-16	18	0	44.8	76.38	22.3	114.22	10
HFD	2019-04-23	18	0	47	85.04	20.7	106	11
HFD	2019-04-30	18	0	48.4	90.55	19.8	101.42	12
HFD	2019-05-07	18	0	49.5	94.88	20.3	104	13
HFD	2019-05-14	18	0	50.3	98.03	20.6	105.51	14
HFD	2019-05-21	18	0	51.2	101.57	21.3	109.1	15
HFD	2019-05-28	18	0	51.8	103.94	24.1	123.44	16
HFD	2019-02-04	19	0	26.1	0	27.9	142.9	0
HFD	2019-02-12	19	0	26.7	2.3	16.5	84.5	1
HFD	2019-02-19	19	0	28	7.28	19	97.3	2
HFD	2019-02-26	19	0	29.2	11.88	18.8	96.29	3
HFD	2019-03-05	19	0	29.1	11.49	15.5	79.39	4
HFD	2019-03-12	19	0	30.7	17.62	19.4	99.37	5
HFD	2019-03-19	19	0	33	26.4	20.5	105	6
HFD	2019-03-26	19	0	34.8	33.3	19.4	99.37	7
HFD	2019-04-02	19	0	37.1	42.1	21	107.56	8
HFD	2019-04-09	19	0	37.9	45.21	20.1	102.95	9
HFD	2019-04-16	19	0	39.7	52.11	24.3	124.46	10
HFD	2019-04-23	19	0	42.9	64.37	23.7	121.4	11
HFD	2019-04-30	19	0	44.1	68.97	21.5	110.12	12
HFD	2019-05-07	19	0	45.6	74.71	22.7	116.3	13
HFD	2019-05-14	19	0	46.2	77.01	23.2	118.83	14
HFD	2019-05-21	19	0	47.2	80.84	26.1	133.68	15
HFD	2019-05-28	19	0	47.3	81.23	26.2	134.2	16
HFD	2019-02-04	20	0	26.2	0	26.9	137.8	0
HFD	2019-02-12	20	0	28.7	9.54	14.7	75.3	1
HFD	2019-02-19	20	0	30.9	17.94	21.9	112.2	2
HFD	2019-02-26	20	0	32.2	22.9	20.3	103.98	3
HFD	2019-03-05	20	0	33.2	26.72	18.4	94.24	4
HFD	2019-03-12	20	0	35.4	35.11	20.6	105.51	5
HFD	2019-03-19	20	0	38	45	20.7	106.03	6
HFD	2019-03-26	20	0	40.2	53.4	20.9	107.05	7
HFD	2019-04-02	20	0	42.6	62.6	22.5	115.24	8
HFD	2019-04-09	20	0	44.1	68.32	20.5	105	9
HFD	2019-04-16	20	0	45	71.76	20.9	107.05	10
HFD	2019-04-23	20	0	47.5	81.3	20.7	106	11
HFD	2019-04-30	20	0	48.6	85.5	20.2	103.46	12
HFD	2019-05-07	20	0	49.4	88.55	20.4	104.5	13
HFD	2019-05-14	20	0	49.7	89.69	20.4	104.49	14
HFD	2019-05-21	20	0	50.4	92.37	20.3	103.98	15
HFD	2019-05-28	20	0	50.7	93.51	25.5	130.61	16
HFD	2019-02-04	21	0	26	0	24.2	124	0
HFD	2019-02-12	21	0	29.2	12.31	19.5	99.9	1
HFD	2019-02-19	21	0	32.7	25.77	21	107.6	2
HFD	2019-02-26	21	0	34.5	32.69	19.9	101.93	3
HFD	2019-03-05	21	0	36.7	41.15	18.4	94.24	4
HFD	2019-03-12	21	0	38.6	48.46	20.5	105	5
HFD	2019-03-19	21	0	39.9	53.5	18.4	94.24	6
HFD	2019-03-26	21	0	41.5	59.6	17.5	89.63	7
HFD	2019-04-02	21	0	44	69.2	18.8	96.29	8
HFD	2019-04-09	21	0	44.2	70	16.5	84.51	9
HFD	2019-04-16	21	0	47	80.77	20.8	106.54	10
HFD	2019-04-23	21	0	48.1	85	17.9	91.7	11
HFD	2019-04-30	21	0	49.7	91.15	18.5	94.76	12
HFD	2019-05-07	21	0	51	96.15	31.7	162.4	13
HFD	2019-05-14	21	0	51.4	97.69	18.7	95.78	14
HFD	2019-05-21	21	0	51.5	98.08	19.4	99.37	15
HFD	2019-05-28	21	0	52.3	101.15	23.6	120.88	16
HFD	2019-02-04	22	0	25.6	0	23.4	119.9	0
HFD	2019-02-12	22	0	27.4	7.03	18	92.2	1
HFD	2019-02-19	22	0	28.7	12.11	18.2	93.2	2
HFD	2019-02-26	22	0	30.1	17.58	18.1	92.71	3
HFD	2019-03-05	22	0	33.5	30.86	20.5	105	4
HFD	2019-03-12	22	0	34.1	33.2	14.3	73.24	5
HFD	2019-03-19	22	0	36	40.6	19	97.32	6
HFD	2019-03-26	22	0	38.6	50.8	19.4	99.37	7
HFD	2019-04-02	22	0	41.8	63.3	20.6	105.51	8
HFD	2019-04-09	22	0	42.3	65.23	18.2	93.22	9
HFD	2019-04-16	22	0	45.3	76.95	22	112.68	10
HFD	2019-04-23	22	0	47.6	85.94	19.5	99.9	11
HFD	2019-04-30	22	0	48.9	91.02	19	97.32	12
HFD	2019-05-07	22	0	49.1	91.8	19	97.3	13
HFD	2019-05-14	22	0	49.3	92.58	18.3	93.73	14
HFD	2019-05-21	22	0	49.7	94.14	20.6	105.51	15
HFD	2019-05-28	22	0	50	95.31	26.6	136.25	16
HFD	2019-02-04	23	0	24.2	0	27.1	138.8	0
HFD	2019-02-12	23	0	24.6	1.65	17.1	87.6	1
HFD	2019-02-19	23	0	25.9	7.02	19.4	99.4	2
HFD	2019-02-26	23	0	27.3	12.81	19.9	101.93	3
HFD	2019-03-05	23	0	28	15.7	19.1	97.83	4
HFD	2019-03-12	23	0	29.2	20.66	19.6	100.39	5
HFD	2019-03-19	23	0	31.2	28.9	18.9	96.81	6
HFD	2019-03-26	23	0	33.5	38.4	18.5	94.76	7
HFD	2019-04-02	23	0	35.2	45.5	19.7	100.9	8
HFD	2019-04-09	23	0	37.2	53.72	19.1	97.83	9
HFD	2019-04-16	23	0	38.8	60.33	19.8	101.42	10
HFD	2019-04-23	23	0	40.9	69.01	19.5	99.9	11
HFD	2019-04-30	23	0	42.5	75.62	19.5	99.88	12
HFD	2019-05-07	23	0	43.9	81.4	19.5	99.9	13
HFD	2019-05-14	23	0	46.1	90.5	21.2	108.59	14
HFD	2019-05-21	23	0	47.3	95.45	20	102.44	15
HFD	2019-05-28	23	0	48.7	101.24	26.3	134.71	16
HFD	2019-02-04	24	0	25.5	0	23.6	120.9	0
HFD	2019-02-12	24	0	27.4	7.45	17.1	87.6	1
HFD	2019-02-19	24	0	29.2	14.51	19.6	100.4	2
HFD	2019-02-26	24	0	32.1	25.88	20.7	106.03	3
HFD	2019-03-05	24	0	33.4	30.98	20.9	107.05	4
HFD	2019-03-12	24	0	35.6	39.61	19.9	101.93	5
HFD	2019-03-19	24	0	36.7	43.9	18.4	94.24	6
HFD	2019-03-26	24	0	38.2	49.8	17.4	89.12	7
HFD	2019-04-02	24	0	41.5	62.7	21.5	110.12	8
HFD	2019-04-09	24	0	42.4	66.27	20.2	103.46	9
HFD	2019-04-16	24	0	44.6	74.9	19.9	101.93	10
HFD	2019-04-23	24	0	46.6	82.75	20	102.4	11
HFD	2019-04-30	24	0	48.3	89.41	20.9	107.05	12
HFD	2019-05-07	24	0	50	96.08	20	102.4	13
HFD	2019-05-14	24	0	50.4	97.65	21.8	111.66	14
HFD	2019-05-21	24	0	50	96.08	18.5	94.76	15
HFD	2019-05-28	24	0	50.2	96.86	26.8	137.27	16
HFD+HXN	2019-02-04	25	2	27.4	0	20.91	107.1	0
HFD+HXN	2019-02-12	25	2	27.3	-0.36	15.6	79.9	1
HFD+HXN	2019-02-19	25	2	29.5	7.66	20.2	103.5	2
HFD+HXN	2019-02-26	25	2	29.3	6.93	17.8	91.17	3
HFD+HXN	2019-03-05	25	2	31.7	15.69	20.8	106.54	4
HFD+HXN	2019-03-12	25	2	32.6	18.98	19.1	97.83	5
HFD+HXN	2019-03-19	25	2	33.2	21.2	17.1	87.59	6
HFD+HXN	2019-03-26	25	2	35.2	28.5	18.5	94.76	7
HFD+HXN	2019-04-02	25	2	37.9	38.3	20.4	104.49	8
HFD+HXN	2019-04-09	25	2	40.4	47.45	15.6	79.9	9
HFD+HXN	2019-04-16	25	2	41	49.64	14.2	72.73	10
HFD+HXN	2019-04-23	25	2	43	56.93	20.3	104	11
HFD+HXN	2019-04-30	25	2	45.3	65.33	21.1	108.07	12
HFD+HXN	2019-05-07	25	2	47.7	74.09	18.8	96.3	13
HFD+HXN	2019-05-14	25	2	50.3	83.58	20.5	105	14
HFD+HXN	2019-05-21	25	2	51.6	88.32	21.3	109.1	15
HFD+HXN	2019-05-28	25	2	52.7	92.34	18.8	96.29	16
HFD+HXN	2019-02-04	26	2	26.1	0	16.41	84.1	0
HFD+HXN	2019-02-12	26	2	28.7	9.96	19	97.3	1
HFD+HXN	2019-02-19	26	2	29.5	13.03	20.2	103.5	2
HFD+HXN	2019-02-26	26	2	30.6	17.24	19.1	97.83	3
HFD+HXN	2019-03-05	26	2	32.6	24.9	19.7	100.9	4
HFD+HXN	2019-03-12	26	2	34.4	31.8	21.7	111.15	5
HFD+HXN	2019-03-19	26	2	36.2	38.7	19.6	100.39	6
HFD+HXN	2019-03-26	26	2	38.8	48.7	21.2	108.59	7
HFD+HXN	2019-04-02	26	2	41.6	59.4	20.8	106.54	8
HFD+HXN	2019-04-09	26	2	43.1	65.13	15.4	78.88	9
HFD+HXN	2019-04-16	26	2	44.4	70.11	16.6	85.03	10
HFD+HXN	2019-04-23	26	2	46.4	77.78	21.1	108.1	11
HFD+HXN	2019-04-30	26	2	49.2	88.51	21.3	109.1	12
HFD+HXN	2019-05-07	26	2	50.5	93.49	21.3	109.1	13
HFD+HXN	2019-05-14	26	2	51.7	98.08	18.6	95.27	14
HFD+HXN	2019-05-21	26	2	52.5	101.15	21.1	108.07	15
HFD+HXN	2019-05-28	26	2	52.4	100.77	23.8	121.9	16
HFD+HXN	2019-02-04	27	2	25.8	0	25.78	132	0
HFD+HXN	2019-02-12	27	2	27.4	6.2	18	92.2	1
HFD+HXN	2019-02-19	27	2	30.2	17.05	23.7	121.4	2
HFD+HXN	2019-02-26	27	2	31.4	21.71	20.4	104.49	3
HFD+HXN	2019-03-05	27	2	34.5	33.72	22.4	114.73	4
HFD+HXN	2019-03-12	27	2	36	39.53	21.7	111.15	5
HFD+HXN	2019-03-19	27	2	37.1	43.8	18.7	95.78	6
HFD+HXN	2019-03-26	27	2	39.7	53.9	20.2	103.46	7
HFD+HXN	2019-04-02	27	2	43.1	67.1	22.1	113.2	8
HFD+HXN	2019-04-09	27	2	45	74.42	20.3	103.98	9
HFD+HXN	2019-04-16	27	2	44.8	73.64	18.1	92.71	10
HFD+HXN	2019-04-23	27	2	46.8	81.4	21	107.6	11
HFD+HXN	2019-04-30	27	2	49	89.92	21.8	111.66	12
HFD+HXN	2019-05-07	27	2	50.4	95.35	22.2	113.7	13
HFD+HXN	2019-05-14	27	2	50.9	97.29	20.7	106.03	14
HFD+HXN	2019-05-21	27	2	50.6	96.12	21.6	110.64	15
HFD+HXN	2019-05-28	27	2	51.2	98.45	17.3	88.61	16
HFD+HXN	2019-02-04	28	2	26.1	0	26.22	134.3	0
HFD+HXN	2019-02-12	28	2	29.2	11.88	18.4	94.2	1
HFD+HXN	2019-02-19	28	2	32.1	22.99	24	122.9	2
HFD+HXN	2019-02-26	28	2	34.6	32.57	22.1	113.2	3
HFD+HXN	2019-03-05	28	2	36.4	39.46	21.2	108.59	4
HFD+HXN	2019-03-12	28	2	38	45.59	21.8	111.66	5
HFD+HXN	2019-03-19	28	2	39.6	51.7	19.2	98.34	6
HFD+HXN	2019-03-26	28	2	40.5	55.2	18.4	94.24	7
HFD+HXN	2019-04-02	28	2	43.4	66.3	19.3	98.85	8
HFD+HXN	2019-04-09	28	2	44	68.58	18.2	93.22	9
HFD+HXN	2019-04-16	28	2	46.6	78.54	19.9	101.93	10
HFD+HXN	2019-04-23	28	2	47.6	82.38	21.4	109.6	11
HFD+HXN	2019-04-30	28	2	48.7	86.59	19.7	100.9	12
HFD+HXN	2019-05-07	28	2	49.6	90.04	19.9	101.9	13
HFD+HXN	2019-05-14	28	2	50.1	91.95	21.6	110.64	14
HFD+HXN	2019-05-21	28	2	51.3	96.55	23.2	118.83	15
HFD+HXN	2019-05-28	28	2	51.2	96.17	24.8	127.03	16
HFD+HXN	2019-02-04	29	2	26.1	0	24.76	126.8	0
HFD+HXN	2019-02-12	29	2	29.2	11.88	15.3	78.4	1
HFD+HXN	2019-02-19	29	2	30.8	18.01	20.9	107	2
HFD+HXN	2019-02-26	29	2	30.6	17.24	17.6	90.15	3
HFD+HXN	2019-03-05	29	2	32.6	24.9	21.3	109.1	4
HFD+HXN	2019-03-12	29	2	32.8	25.67	19.3	98.85	5
HFD+HXN	2019-03-19	29	2	34.7	33	19.4	99.37	6
HFD+HXN	2019-03-26	29	2	36.4	39.5	20.1	102.95	7
HFD+HXN	2019-04-02	29	2	39.5	51.3	20.8	106.54	8
HFD+HXN	2019-04-09	29	2	41	57.09	19.4	99.37	9
HFD+HXN	2019-04-16	29	2	42.7	63.6	19.6	100.39	10
HFD+HXN	2019-04-23	29	2	45	72.41	20	102.4	11
HFD+HXN	2019-04-30	29	2	46.6	78.54	21	107.56	12
HFD+HXN	2019-05-07	29	2	48.5	85.82	20.4	104.5	13
HFD+HXN	2019-05-14	29	2	50.5	93.49	18.7	95.78	14
HFD+HXN	2019-05-21	29	2	51.3	96.55	20.5	105	15
HFD+HXN	2019-05-28	29	2	51.8	98.47	25.3	129.59	16
HFD+HXN	2019-02-04	30	2	25.4	0	24.27	124.3	0
HFD+HXN	2019-02-12	30	2	28.2	11.02	10.9	55.8	1
HFD+HXN	2019-02-19	30	2	30	18.11	20.8	106.5	2
HFD+HXN	2019-02-26	30	2	32.5	27.95	21.5	110.12	3
HFD+HXN	2019-03-05	30	2	34.5	35.83	20.5	105	4
HFD+HXN	2019-03-12	30	2	36.1	42.13	19.6	100.39	5
HFD+HXN	2019-03-19	30	2	36.7	44.5	17.8	91.17	6
HFD+HXN	2019-03-26	30	2	38.7	52.4	18.9	96.81	7
HFD+HXN	2019-04-02	30	2	41.8	64.6	20.2	103.46	8
HFD+HXN	2019-04-09	30	2	42.8	68.5	18.5	94.76	9
HFD+HXN	2019-04-16	30	2	45.1	77.56	20.8	106.54	10
HFD+HXN	2019-04-23	30	2	47.9	88.58	20.7	106	11
HFD+HXN	2019-04-30	30	2	49.5	94.88	19.9	101.93	12
HFD+HXN	2019-05-07	30	2	51.6	103.15	20.6	105.5	13
HFD+HXN	2019-05-14	30	2	52.3	105.91	18.8	96.29	14
HFD+HXN	2019-05-21	30	2	52.7	107.48	21	107.56	15
HFD+HXN	2019-05-28	30	2	53.3	109.84	26	133.17	16
HFD+HXN	2019-02-04	31	2	27.2	0	30.1	154.2	0
HFD+HXN	2019-02-12	31	2	29.7	9.19	19.8	101.4	1
HFD+HXN	2019-02-19	31	2	31.8	16.91	25.3	129.6	2
HFD+HXN	2019-02-26	31	2	34.8	27.94	23	117.81	3
HFD+HXN	2019-03-05	31	2	35.8	31.62	20.4	104.49	4
HFD+HXN	2019-03-12	31	2	36.4	33.82	23.4	119.85	5
HFD+HXN	2019-03-19	31	2	37.5	37.9	19.1	97.83	6
HFD+HXN	2019-03-26	31	2	40.8	50	22.5	115.24	7
HFD+HXN	2019-04-02	31	2	43.5	59.9	21.4	109.61	8
HFD+HXN	2019-04-09	31	2	44.3	62.87	19.7	100.9	9
HFD+HXN	2019-04-16	31	2	45.6	67.65	20.6	105.51	10
HFD+HXN	2019-04-23	31	2	48	76.47	23.3	119.3	11
HFD+HXN	2019-04-30	31	2	49	80.15	21.5	110.12	12
HFD+HXN	2019-05-07	31	2	49	80.15	22.4	114.7	13
HFD+HXN	2019-05-14	31	2	49.6	82.35	21.1	108.07	14
HFD+HXN	2019-05-21	31	2	51.8	90.44	24.5	125.49	15
HFD+HXN	2019-05-28	31	2	50.7	86.4	25.7	131.64	16
HFD+HXN	2019-02-04	32	2	25.2	0	25.9	132.7	0
HFD+HXN	2019-02-12	32	2	27.3	8.33	14.5	74.3	1
HFD+HXN	2019-02-19	32	2	29.3	16.27	20.6	105.5	2
HFD+HXN	2019-02-26	32	2	31	23.02	20.4	104.49	3
HFD+HXN	2019-03-05	32	2	31.6	25.4	17.5	89.63	4
HFD+HXN	2019-03-12	32	2	32.2	27.78	18.2	93.22	5
HFD+HXN	2019-03-19	32	2	33.8	34.1	18.1	92.71	6
HFD+HXN	2019-03-26	32	2	35.5	40.9	16.5	84.51	7
HFD+HXN	2019-04-02	32	2	37.9	50.4	19.2	98.34	8
HFD+HXN	2019-04-09	32	2	39.1	55.16	16.8	86.05	9
HFD+HXN	2019-04-16	32	2	40.4	60.32	17.9	91.68	10
HFD+HXN	2019-04-23	32	2	42.9	70.24	18.7	95.8	11
HFD+HXN	2019-04-30	32	2	44.5	76.59	19.2	98.34	12
HFD+HXN	2019-05-07	32	2	45.2	79.37	17.6	90.1	13
HFD+HXN	2019-05-14	32	2	46.6	84.92	17.2	88.1	14
HFD+HXN	2019-05-21	32	2	47.2	87.3	18.5	94.76	15
HFD+HXN	2019-05-28	32	2	47.2	87.3	25.1	128.56	16
HFD+HXN	2019-02-04	33	2	29	0	27.2	139.3	0
HFD+HXN	2019-02-12	33	2	32.3	11.38	10.1	51.7	1
HFD+HXN	2019-02-19	33	2	34.8	20	24	122.9	2
HFD+HXN	2019-02-26	33	2	36.8	26.9	22.9	117.29	3
HFD+HXN	2019-03-05	33	2	38.7	33.45	19.6	100.39	4
HFD+HXN	2019-03-12	33	2	39.3	35.52	19.5	99.88	5
HFD+HXN	2019-03-19	33	2	40.7	40.3	20.2	103.46	6
HFD+HXN	2019-03-26	33	2	42.7	47.2	19.7	100.9	7
HFD+HXN	2019-04-02	33	2	44.4	53.1	19.8	101.42	8
HFD+HXN	2019-04-09	33	2	45.5	56.9	19.8	101.42	9
HFD+HXN	2019-04-16	33	2	47.3	63.1	20.9	107.05	10
HFD+HXN	2019-04-23	33	2	48.6	67.59	20.3	104	11
HFD+HXN	2019-04-30	33	2	50.3	73.45	19.9	101.93	12
HFD+HXN	2019-05-07	33	2	50.3	73.45	21.2	108.6	13
HFD+HXN	2019-05-14	33	2	50.7	74.83	19.8	101.42	14
HFD+HXN	2019-05-21	33	2	51.6	77.93	21.6	110.64	15
HFD+HXN	2019-05-28	33	2	51.3	76.9	28.7	147	16
HFD+HXN	2019-02-04	34	2	26.5	0	22.2	113.7	0
HFD+HXN	2019-02-12	34	2	27.6	4.15	17.7	90.7	1
HFD+HXN	2019-02-19	34	2	29.2	10.19	20.9	107	2
HFD+HXN	2019-02-26	34	2	30.2	13.96	20.8	106.54	3
HFD+HXN	2019-03-05	34	2	31.2	17.74	19.7	100.9	4
HFD+HXN	2019-03-12	34	2	30.9	16.6	16.4	84	5
HFD+HXN	2019-03-19	34	2	33.1	24.9	20.3	103.98	6
HFD+HXN	2019-03-26	34	2	35.5	34	19.5	99.88	7
HFD+HXN	2019-04-02	34	2	38	43.4	19.5	99.88	8
HFD+HXN	2019-04-09	34	2	39.4	48.68	19.5	99.88	9
HFD+HXN	2019-04-16	34	2	40.9	54.34	19.6	100.39	10
HFD+HXN	2019-04-23	34	2	42.2	59.25	18.3	93.7	11
HFD+HXN	2019-04-30	34	2	44.2	66.79	19.3	98.85	12
HFD+HXN	2019-05-07	34	2	45.7	72.45	19.2	98.3	13
HFD+HXN	2019-05-14	34	2	48.5	83.02	20.6	105.51	14
HFD+HXN	2019-05-21	34	2	49	84.91	20.1	102.95	15
HFD+HXN	2019-05-28	34	2	50.2	89.43	26	133.17	16
HFD+HXN	2019-02-04	35	2	25.4	0	22.9	117.3	0
HFD+HXN	2019-02-12	35	2	27.4	7.87	14.3	73.2	1
HFD+HXN	2019-02-19	35	2	28.4	11.81	21.1	108.1	2
HFD+HXN	2019-02-26	35	2	30.1	18.5	20.6	105.51	3
HFD+HXN	2019-03-05	35	2	32.6	28.35	20	102.44	4
HFD+HXN	2019-03-12	35	2	33.1	30.31	22.6	115.76	5
HFD+HXN	2019-03-19	35	2	34.5	35.8	21.4	109.61	6
HFD+HXN	2019-03-26	35	2	34.9	37.4	20.9	107.05	7
HFD+HXN	2019-04-02	35	2	36.2	42.5	24	122.93	8
HFD+HXN	2019-04-09	35	2	37.5	47.64	22	112.68	9
HFD+HXN	2019-04-16	35	2	40.8	60.63	25.9	132.66	10
HFD+HXN	2019-04-23	35	2	43.8	72.44	23.6	120.9	11
HFD+HXN	2019-04-30	35	2	44.8	76.38	22.7	116.27	12
HFD+HXN	2019-05-07	35	2	45.2	77.95	20.8	106.5	13
HFD+HXN	2019-05-14	35	2	46.3	82.28	20.4	104.49	14
HFD+HXN	2019-05-21	35	2	47.2	85.83	21	107.56	15
HFD+HXN	2019-05-28	35	2	47.7	87.8	29.3	150.07	16
HFD+HXN	2019-02-04	36	2	23.6	0	23	117.8	0
HFD+HXN	2019-02-12	36	2	23.8	0.85	16.7	85.5	1
HFD+HXN	2019-02-19	36	2	24.9	5.51	20.7	106	2
HFD+HXN	2019-02-26	36	2	25.5	8.05	14.4	73.76	3
HFD+HXN	2019-03-05	36	2	26	10.17	16.5	84.51	4
HFD+HXN	2019-03-12	36	2	26.3	11.44	17.2	88.1	5
HFD+HXN	2019-03-19	36	2	27.4	16.1	17.6	90.15	6
HFD+HXN	2019-03-26	36	2	28.3	19.9	15.1	77.34	7
HFD+HXN	2019-04-02	36	2	30.2	28	16.8	86.05	8
HFD+HXN	2019-04-09	36	2	31.3	32.63	14.4	73.76	9
HFD+HXN	2019-04-16	36	2	31.5	33.47	12.1	61.98	10
HFD+HXN	2019-04-23	36	2	33.1	40.25	17.6	90.1	11
HFD+HXN	2019-04-30	36	2	35	48.31	18.6	95.27	12
HFD+HXN	2019-05-07	36	2	36.6	55.08	17.6	90.1	13
HFD+HXN	2019-05-14	36	2	37.7	59.75	17.8	91.17	14
HFD+HXN	2019-05-21	36	2	39	65.25	18.5	94.76	15
HFD+HXN	2019-05-28	36	2	39.4	66.95	29.8	152.64	16
HFD+LXN	2019-02-04	37	1	27.8	0	24.54	125.7	0
HFD+LXN	2019-02-12	37	1	27.7	-0.36	11.5	58.9	1
HFD+LXN	2019-02-19	37	1	28	0.72	17.4	89.1	2
HFD+LXN	2019-02-26	37	1	28.8	3.6	18.7	95.78	3
HFD+LXN	2019-03-05	37	1	29.6	6.47	18.3	93.73	4
HFD+LXN	2019-03-12	37	1	31	11.51	17.8	91.17	5
HFD+LXN	2019-03-19	37	1	32.3	16.2	16.4	84	6
HFD+LXN	2019-03-26	37	1	34.3	23.4	17.9	91.68	7
HFD+LXN	2019-04-02	37	1	36.7	32	19	97.32	8
HFD+LXN	2019-04-09	37	1	37.5	34.89	13.5	69.15	9
HFD+LXN	2019-04-16	37	1	37.8	35.97	13.7	70.17	10
HFD+LXN	2019-04-23	37	1	40.1	44.24	19.5	99.9	11
HFD+LXN	2019-04-30	37	1	41.4	48.92	19.3	98.85	12
HFD+LXN	2019-05-07	37	1	43.1	55.04	19.4	99.4	13
HFD+LXN	2019-05-14	37	1	45.1	62.23	19.7	100.9	14
HFD+LXN	2019-05-21	37	1	46	65.47	19.7	100.9	15
HFD+LXN	2019-05-28	37	1	47.3	70.14	16.7	85.54	16
HFD+LXN	2019-02-04	38	1	23.8	0	21.25	108.8	0
HFD+LXN	2019-02-12	38	1	25	5.04	12	61.5	1
HFD+LXN	2019-02-19	38	1	25.8	8.4	19.2	98.3	2
HFD+LXN	2019-02-26	38	1	27.2	14.29	20.5	105	3
HFD+LXN	2019-03-05	38	1	28.1	18.07	19.4	99.37	4
HFD+LXN	2019-03-12	38	1	30	26.05	19.96	102.24	5
HFD+LXN	2019-03-19	38	1	30.8	29.4	17.4	89.12	6
HFD+LXN	2019-03-26	38	1	32	34.5	17.7	90.66	7
HFD+LXN	2019-04-02	38	1	34.5	45	18.9	96.81	8
HFD+LXN	2019-04-09	38	1	34.1	43.28	12.9	66.07	9
HFD+LXN	2019-04-16	38	1	35.7	50	16.5	84.51	10
HFD+LXN	2019-04-23	38	1	38.1	60.08	22.3	114.2	11
HFD+LXN	2019-04-30	38	1	39.7	66.81	21.5	110.12	12
HFD+LXN	2019-05-07	38	1	42	76.47	22.1	113.2	13
HFD+LXN	2019-05-14	38	1	43.5	82.77	22.6	115.76	14
HFD+LXN	2019-05-21	38	1	45.3	90.34	21.7	111.15	15
HFD+LXN	2019-05-28	38	1	46	93.28	19.4	99.37	16
HFD+LXN	2019-02-04	39	1	24.8	0	21.38	109.5	0
HFD+LXN	2019-02-12	39	1	26.7	7.66	18.6	95.3	1
HFD+LXN	2019-02-19	39	1	29.4	18.55	21.8	111.7	2
HFD+LXN	2019-02-26	39	1	31.8	28.23	20.4	104.49	3
HFD+LXN	2019-03-05	39	1	33	33.06	20.9	107.05	4
HFD+LXN	2019-03-12	39	1	34.7	39.92	19.2	98.34	5
HFD+LXN	2019-03-19	39	1	36	45.2	16.7	85.54	6
HFD+LXN	2019-03-26	39	1	35.5	43.1	13.8	70.68	7
HFD+LXN	2019-04-02	39	1	37.9	52.8	17.6	90.15	8
HFD+LXN	2019-04-09	39	1	39.6	59.68	17.7	90.66	9
HFD+LXN	2019-04-16	39	1	41.5	67.34	18.5	94.76	10
HFD+LXN	2019-04-23	39	1	43.5	75.4	20.1	103	11
HFD+LXN	2019-04-30	39	1	46.1	85.89	19.8	101.42	12
HFD+LXN	2019-05-07	39	1	48.2	94.35	19.1	97.8	13
HFD+LXN	2019-05-14	39	1	50.5	103.63	18.8	96.29	14
HFD+LXN	2019-05-21	39	1	51.2	106.45	19.2	98.34	15
HFD+LXN	2019-05-28	39	1	50.5	103.63	16.6	85.03	16
HFD+LXN	2019-02-04	40	1	25.1	0	19.3	98.9	0
HFD+LXN	2019-02-12	40	1	26.8	6.77	11.9	61	1
HFD+LXN	2019-02-19	40	1	27	7.57	21.9	112.2	2
HFD+LXN	2019-02-26	40	1	28.3	12.75	22.8	116.78	3
HFD+LXN	2019-03-05	40	1	29.3	16.73	19.4	99.37	4
HFD+LXN	2019-03-12	40	1	29.5	17.53	16.4	84	5
HFD+LXN	2019-03-19	40	1	31.7	26.3	17.4	89.12	6
HFD+LXN	2019-03-26	40	1	32.4	29.1	16.8	86.05	7
HFD+LXN	2019-04-02	40	1	34.2	36.3	18.2	93.22	8
HFD+LXN	2019-04-09	40	1	36.4	45.02	18.3	93.73	9
HFD+LXN	2019-04-16	40	1	37	47.41	16.2	82.98	10
HFD+LXN	2019-04-23	40	1	37	47.41	16.1	82.5	11
HFD+LXN	2019-04-30	40	1	39.8	58.57	18.6	95.27	12
HFD+LXN	2019-05-07	40	1	41.5	65.34	18	92.2	13
HFD+LXN	2019-05-14	40	1	44.2	76.1	18.9	96.81	14
HFD+LXN	2019-05-21	40	1	46.1	83.67	19.9	101.93	15
HFD+LXN	2019-05-28	40	1	47.3	88.45	19	97.32	16
HFD+LXN	2019-02-04	41	1	25.1	0	20.12	103.1	0
HFD+LXN	2019-02-12	41	1	26	3.59	16.6	85	1
HFD+LXN	2019-02-19	41	1	28.1	11.95	20	102.4	2
HFD+LXN	2019-02-26	41	1	29.4	17.13	19.9	101.93	3
HFD+LXN	2019-03-05	41	1	31.6	25.9	22.7	116.27	4
HFD+LXN	2019-03-12	41	1	33	31.47	18.6	95.27	5
HFD+LXN	2019-03-19	41	1	35.8	42.6	18.1	92.71	6
HFD+LXN	2019-03-26	41	1	37.3	48.6	16.8	86.05	7
HFD+LXN	2019-04-02	41	1	39.4	57	21.3	109.1	8
HFD+LXN	2019-04-09	41	1	40	59.36	17.6	90.15	9
HFD+LXN	2019-04-16	41	1	41.5	65.34	21.1	108.07	10
HFD+LXN	2019-04-23	41	1	43.8	74.5	17.9	91.7	11
HFD+LXN	2019-04-30	41	1	45.2	80.08	22.5	115.24	12
HFD+LXN	2019-05-07	41	1	46.9	86.85	21	107.6	13
HFD+LXN	2019-05-14	41	1	48.1	91.63	21.8	111.66	14
HFD+LXN	2019-05-21	41	1	50.1	99.6	22.3	114.22	15
HFD+LXN	2019-05-28	41	1	50.4	100.8	15.3	78.37	16
HFD+LXN	2019-02-04	42	1	26.8	0	22.72	116.4	0
HFD+LXN	2019-02-12	42	1	31.5	17.54	13.5	69.1	1
HFD+LXN	2019-02-19	42	1	32.4	20.9	21.8	111.7	2
HFD+LXN	2019-02-26	42	1	33.5	25	19.7	100.9	3
HFD+LXN	2019-03-05	42	1	36	34.33	22	112.68	4
HFD+LXN	2019-03-12	42	1	36.4	35.82	20.4	104.49	5
HFD+LXN	2019-03-19	42	1	38.2	42.5	17.2	88.1	6
HFD+LXN	2019-03-26	42	1	39.7	48.1	15.3	78.37	7
HFD+LXN	2019-04-02	42	1	43.8	63.4	18	92.2	8
HFD+LXN	2019-04-09	42	1	45.4	69.4	12.5	64.02	9
HFD+LXN	2019-04-16	42	1	47.6	77.61	16.6	85.03	10
HFD+LXN	2019-04-23	42	1	49.6	85.07	18.7	95.8	11
HFD+LXN	2019-04-30	42	1	51	90.3	22.8	116.78	12
HFD+LXN	2019-05-07	42	1	52.5	95.9	18.5	94.8	13
HFD+LXN	2019-05-14	42	1	53.5	99.63	16.8	86.05	14
HFD+LXN	2019-05-21	42	1	53.4	99.25	18.8	96.29	15
HFD+LXN	2019-05-28	42	1	53.4	99.25	29.7	152.12	16
HFD+LXN	2019-02-04	43	1	25.1	0	23.9	122.4	0
HFD+LXN	2019-02-12	43	1	26.6	5.98	16.4	84	1
HFD+LXN	2019-02-19	43	1	27.3	8.76	18.6	95.3	2
HFD+LXN	2019-02-26	43	1	28	11.55	15.7	80.42	3
HFD+LXN	2019-03-05	43	1	28.8	14.74	16.2	82.98	4
HFD+LXN	2019-03-12	43	1	30	19.52	15.6	79.9	5
HFD+LXN	2019-03-19	43	1	30.2	20.3	15.7	80.42	6
HFD+LXN	2019-03-26	43	1	32.3	28.7	17.3	88.61	7
HFD+LXN	2019-04-02	43	1	34.2	36.3	16.6	85.03	8
HFD+LXN	2019-04-09	43	1	34.1	35.86	17.9	91.68	9
HFD+LXN	2019-04-16	43	1	34.7	38.25	19.3	98.85	10
HFD+LXN	2019-04-23	43	1	35.9	43.03	16.9	86.6	11
HFD+LXN	2019-04-30	43	1	37.6	49.8	17.4	89.12	12
HFD+LXN	2019-05-07	43	1	38.3	52.59	22.1	113.2	13
HFD+LXN	2019-05-14	43	1	39.4	56.97	18.7	95.78	14
HFD+LXN	2019-05-21	43	1	40.9	62.95	16.9	86.56	15
HFD+LXN	2019-05-28	43	1	41.8	66.53	22.8	116.78	16
HFD+LXN	2019-02-04	44	1	24.7	0	24.6	126	0
HFD+LXN	2019-02-12	44	1	25.8	4.45	18.9	96.8	1
HFD+LXN	2019-02-19	44	1	27.2	10.12	19.8	101.4	2
HFD+LXN	2019-02-26	44	1	28.2	14.17	19.8	101.42	3
HFD+LXN	2019-03-05	44	1	29.4	19.03	17	87.07	4
HFD+LXN	2019-03-12	44	1	30.7	24.29	20.1	102.95	5
HFD+LXN	2019-03-19	44	1	31.9	29.1	17.2	88.1	6
HFD+LXN	2019-03-26	44	1	33.2	34.4	15.9	81.44	7
HFD+LXN	2019-04-02	44	1	34.9	41.3	19.1	97.83	8
HFD+LXN	2019-04-09	44	1	35.4	43.32	19.9	101.93	9
HFD+LXN	2019-04-16	44	1	36.2	46.56	18.2	93.22	10
HFD+LXN	2019-04-23	44	1	37.6	52.23	17.9	91.7	11
HFD+LXN	2019-04-30	44	1	39.2	58.7	12.5	64.02	12
HFD+LXN	2019-05-07	44	1	41.1	66.4	21.3	109.1	13
HFD+LXN	2019-05-14	44	1	41.7	68.83	16.3	83.49	14
HFD+LXN	2019-05-21	44	1	43	74.09	20.9	107.05	15
HFD+LXN	2019-05-28	44	1	44	78.14	22.4	114.73	16
HFD+LXN	2019-02-04	45	1	25.4	0	26.6	136.2	0
HFD+LXN	2019-02-12	45	1	27.9	9.84	13.7	70.2	1
HFD+LXN	2019-02-19	45	1	28.5	12.2	18.9	96.8	2
HFD+LXN	2019-02-26	45	1	28.8	13.39	17.5	89.63	3
HFD+LXN	2019-03-05	45	1	29.1	14.57	16.7	85.54	4
HFD+LXN	2019-03-12	45	1	30.5	20.08	17.3	88.61	5
HFD+LXN	2019-03-19	45	1	32.9	29.5	18.7	95.78	6
HFD+LXN	2019-03-26	45	1	35.1	38.2	15.4	78.88	7
HFD+LXN	2019-04-02	45	1	37.1	46.1	16.2	82.98	8
HFD+LXN	2019-04-09	45	1	38	49.61	13	66.59	9
HFD+LXN	2019-04-16	45	1	38.4	51.18	11	56.34	10
HFD+LXN	2019-04-23	45	1	40.4	59.06	18.7	95.8	11
HFD+LXN	2019-04-30	45	1	43	69.29	19.7	100.9	12
HFD+LXN	2019-05-07	45	1	43.5	71.26	17	87.1	13
HFD+LXN	2019-05-14	45	1	44.5	75.2	16.8	86.05	14
HFD+LXN	2019-05-21	45	1	46.6	83.46	14.1	72.22	15
HFD+LXN	2019-05-28	45	1	46.7	83.86	19.5	99.88	16
HFD+LXN	2019-02-04	46	1	23.7	0	22.3	114.2	0
HFD+LXN	2019-02-12	46	1	25.6	8.02	13.6	69.7	1
HFD+LXN	2019-02-19	46	1	26.4	11.39	17	87.1	2
HFD+LXN	2019-02-26	46	1	27.3	15.19	16.9	86.56	3
HFD+LXN	2019-03-05	46	1	28.3	19.41	17	87.07	4
HFD+LXN	2019-03-12	46	1	29.5	24.47	18	92.2	5
HFD+LXN	2019-03-19	46	1	30.1	27	14.7	75.29	6
HFD+LXN	2019-03-26	46	1	31	30.8	18.1	92.71	7
HFD+LXN	2019-04-02	46	1	33.5	41.4	20.4	104.49	8
HFD+LXN	2019-04-09	46	1	34	43.46	17.4	89.12	9
HFD+LXN	2019-04-16	46	1	34.7	46.41	23.8	121.9	10
HFD+LXN	2019-04-23	46	1	35.8	51.05	16.6	85	11
HFD+LXN	2019-04-30	46	1	36.8	55.27	16.6	85.03	12
HFD+LXN	2019-05-07	46	1	38.4	62.03	11.3	57.9	13
HFD+LXN	2019-05-14	46	1	38.4	62.03	26.1	133.68	14
HFD+LXN	2019-05-21	46	1	39.3	65.82	22.5	115.24	15
HFD+LXN	2019-05-28	46	1	40.8	72.15	34.5	176.71	16
HFD+LXN	2019-02-04	47	1	27.3	0	23.2	118.8	0
HFD+LXN	2019-02-12	47	1	29.6	8.42	18.1	92.7	1
HFD+LXN	2019-02-19	47	1	31.5	15.38	20	102.4	2
HFD+LXN	2019-02-26	47	1	34	24.54	21.1	108.07	3
HFD+LXN	2019-03-05	47	1	35.2	28.94	17.8	91.17	4
HFD+LXN	2019-03-12	47	1	36.7	34.43	19.1	97.83	5
HFD+LXN	2019-03-19	47	1	38.2	39.9	18.5	94.76	6
HFD+LXN	2019-03-26	47	1	40.8	49.5	15.1	77.34	7
HFD+LXN	2019-04-02	47	1	44.4	62.6	19	97.32	8
HFD+LXN	2019-04-09	47	1	46.2	69.23	17.8	91.17	9
HFD+LXN	2019-04-16	47	1	48.4	77.29	19.1	97.83	10
HFD+LXN	2019-04-23	47	1	49.5	81.32	19.5	99.9	11
HFD+LXN	2019-04-30	47	1	50.3	84.25	19.1	97.83	12
HFD+LXN	2019-05-07	47	1	51.5	88.64	21.2	108.6	13
HFD+LXN	2019-05-14	47	1	51.7	89.38	20.8	106.54	14
HFD+LXN	2019-05-21	47	1	51.9	90.11	20.1	102.95	15
HFD+LXN	2019-05-28	47	1	51.7	89.38	25.3	129.59	16
HFD+LXN	2019-02-04	48	1	23.7	0	23.2	118.8	0
HFD+LXN	2019-02-12	48	1	24.8	4.64	17.4	89.1	1
HFD+LXN	2019-02-19	48	1	26.5	11.81	20.4	104.5	2
HFD+LXN	2019-02-26	48	1	28.5	20.25	20.7	106.03	3
HFD+LXN	2019-03-05	48	1	30.7	29.54	21.2	108.59	4
HFD+LXN	2019-03-12	48	1	32.1	35.44	21.4	109.61	5
HFD+LXN	2019-03-19	48	1	33.2	40.1	17.6	90.15	6
HFD+LXN	2019-03-26	48	1	34.7	46.4	13.9	71.2	7
HFD+LXN	2019-04-02	48	1	36.6	54.4	12.5	64.02	8
HFD+LXN	2019-04-09	48	1	37.9	59.92	14.2	72.73	9
HFD+LXN	2019-04-16	48	1	39.9	68.35	13.9	71.2	10
HFD+LXN	2019-04-23	48	1	41.5	75.11	20.6	105.5	11
HFD+LXN	2019-04-30	48	1	43.9	85.23	17.4	89.12	12
HFD+LXN	2019-05-07	48	1	45.6	92.41	11.7	59.9	13
HFD+LXN	2019-05-14	48	1	46.7	97.05	12.5	64.02	14
HFD+LXN	2019-05-21	48	1	47.8	101.69	16.4	84	15
HFD+LXN	2019-05-28	48	1	48.8	105.91	13.7	70.17	16
HFD+TXN	2019-02-04	49	3	26	0	20.36	104.3	0
HFD+TXN	2019-02-12	49	3	27.2	4.62	13.9	71.2	1
HFD+TXN	2019-02-19	49	3	27.6	6.15	20.5	105	2
HFD+TXN	2019-02-26	49	3	27.6	6.15	19.8	101.42	3
HFD+TXN	2019-03-05	49	3	28.6	10	18.2	93.22	4
HFD+TXN	2019-03-12	49	3	29	11.54	22.3	114.22	5
HFD+TXN	2019-03-19	49	3	31.4	20.8	18.4	94.24	6
HFD+TXN	2019-03-26	49	3	31	19.2	16.6	85.03	7
HFD+TXN	2019-04-02	49	3	32.1	23.5	18.5	94.76	8
HFD+TXN	2019-04-09	49	3	33	26.92	15.9	81.44	9
HFD+TXN	2019-04-16	49	3	34	30.77	17.3	88.61	10
HFD+TXN	2019-04-23	49	3	36	38.46	19.3	98.9	11
HFD+TXN	2019-04-30	49	3	36.9	41.92	19.7	100.9	12
HFD+TXN	2019-05-07	49	3	37.6	44.62	21.1	108.1	13
HFD+TXN	2019-05-14	49	3	38.2	46.92	19.3	98.85	14
HFD+TXN	2019-05-21	49	3	40	53.85	21.1	108.07	15
HFD+TXN	2019-05-28	49	3	40.8	56.92	15.4	78.88	16
HFD+TXN	2019-02-04	51	3	25	0	24.04	123.1	0
HFD+TXN	2019-02-12	51	3	25.7	2.8	17.9	91.7	1
HFD+TXN	2019-02-19	51	3	27	8	19.3	98.9	2
HFD+TXN	2019-02-26	51	3	28.3	13.2	19.2	98.34	3
HFD+TXN	2019-03-05	51	3	28.9	15.6	17.3	88.61	4
HFD+TXN	2019-03-12	51	3	30.4	21.6	17.7	90.66	5
HFD+TXN	2019-03-19	51	3	32.5	30	17.8	91.17	6
HFD+TXN	2019-03-26	51	3	33.5	34	16	81.95	7
HFD+TXN	2019-04-02	51	3	34.8	39.2	16.7	85.54	8
HFD+TXN	2019-04-09	51	3	36.2	44.8	16.9	86.56	9
HFD+TXN	2019-04-16	51	3	36.4	45.6	15.5	79.39	10
HFD+TXN	2019-04-23	51	3	38.5	54	18.2	93.2	11
HFD+TXN	2019-04-30	51	3	40.3	61.2	16.5	84.51	12
HFD+TXN	2019-05-07	51	3	42.4	69.6	17.6	90.1	13
HFD+TXN	2019-05-14	51	3	43.1	72.4	17.4	89.12	14
HFD+TXN	2019-05-21	51	3	45	80	18.4	94.24	15
HFD+TXN	2019-05-28	51	3	45.9	83.6	15.9	81.44	16
HFD+TXN	2019-02-04	52	3	24.5	0	24.43	125.1	0
HFD+TXN	2019-02-12	52	3	25.5	4.08	16.9	86.6	1
HFD+TXN	2019-02-19	52	3	26	6.12	21.7	111.1	2
HFD+TXN	2019-02-26	52	3	26.3	7.35	15.8	80.93	3
HFD+TXN	2019-03-05	52	3	26.8	9.39	23.4	119.85	4
HFD+TXN	2019-03-12	52	3	27.4	11.84	15.9	81.44	5
HFD+TXN	2019-03-19	52	3	29	18.4	15.2	77.85	6
HFD+TXN	2019-03-26	52	3	29.9	22	14.7	75.29	7
HFD+TXN	2019-04-02	52	3	32.6	33.1	17	87.07	8
HFD+TXN	2019-04-09	52	3	33.6	37.14	16.3	83.49	9
HFD+TXN	2019-04-16	52	3	33.1	35.1	15.1	77.34	10
HFD+TXN	2019-04-23	52	3	35.1	43.27	17.1	87.6	11
HFD+TXN	2019-04-30	52	3	37.3	52.24	17	87.07	12
HFD+TXN	2019-05-07	52	3	38.3	56.33	16.7	85.5	13
HFD+TXN	2019-05-14	52	3	40	63.27	17.4	89.12	14
HFD+TXN	2019-05-21	52	3	41.3	68.57	18.4	94.24	15
HFD+TXN	2019-05-28	52	3	42.1	71.84	16.6	85.03	16
HFD+TXN	2019-02-04	53	3	26.5	0	25.61	131.2	0
HFD+TXN	2019-02-12	53	3	28.1	6.04	15.5	79.4	1
HFD+TXN	2019-02-19	53	3	29	9.43	21.9	112.2	2
HFD+TXN	2019-02-26	53	3	30	13.21	18.3	93.73	3
HFD+TXN	2019-03-05	53	3	30.4	14.72	20	102.44	4
HFD+TXN	2019-03-12	53	3	32	20.75	19.4	99.37	5
HFD+TXN	2019-03-19	53	3	34.2	29.1	17.6	90.15	6
HFD+TXN	2019-03-26	53	3	35.5	34	17.2	88.1	7
HFD+TXN	2019-04-02	53	3	37.9	43	18.1	92.71	8
HFD+TXN	2019-04-09	53	3	37.6	41.89	14.3	73.24	9
HFD+TXN	2019-04-16	53	3	39	47.17	18.6	95.27	10
HFD+TXN	2019-04-23	53	3	41	54.72	16.9	86.6	11
HFD+TXN	2019-04-30	53	3	42.8	61.51	19.8	101.42	12
HFD+TXN	2019-05-07	53	3	45.6	72.08	21.2	108.6	13
HFD+TXN	2019-05-14	53	3	47.4	78.87	19	97.32	14
HFD+TXN	2019-05-21	53	3	49.2	85.66	21.2	108.59	15
HFD+TXN	2019-05-28	53	3	50.4	90.19	16.1	82.46	16
HFD+TXN	2019-02-04	54	3	21.9	0	24.38	124.9	0
HFD+TXN	2019-02-12	54	3	22	0.46	10.7	54.8	1
HFD+TXN	2019-02-19	54	3	22.1	0.91	16.8	86	2
HFD+TXN	2019-02-26	54	3	22.5	2.74	19.3	98.85	3
HFD+TXN	2019-03-05	54	3	23.5	7.31	19.2	98.34	4
HFD+TXN	2019-03-12	54	3	24.1	10.05	17.7	90.66	5
HFD+TXN	2019-03-19	54	3	24.8	13.2	14.8	75.81	6
HFD+TXN	2019-03-26	54	3	25.6	16.9	14.1	72.22	7
HFD+TXN	2019-04-02	54	3	28.3	29.2	16.9	86.56	8
HFD+TXN	2019-04-09	54	3	29.2	33.33	15.8	80.93	9
HFD+TXN	2019-04-16	54	3	29.6	35.16	16.4	84	10
HFD+TXN	2019-04-23	54	3	31.2	42.47	16	82	11
HFD+TXN	2019-04-30	54	3	32.3	47.49	16.6	85.03	12
HFD+TXN	2019-05-07	54	3	33.7	53.88	17.6	90.1	13
HFD+TXN	2019-05-14	54	3	35.4	61.64	16.8	86.05	14
HFD+TXN	2019-05-21	54	3	36.5	66.67	17.9	91.68	15
HFD+TXN	2019-05-28	54	3	36.6	67.12	19.1	97.83	16
HFD+TXN	2019-02-04	55	3	23.9	0	23.4	119.9	0
HFD+TXN	2019-02-12	55	3	25.8	7.95	18.4	94.2	1
HFD+TXN	2019-02-19	55	3	26.4	10.46	18.9	96.8	2
HFD+TXN	2019-02-26	55	3	26.4	10.46	16.2	82.98	3
HFD+TXN	2019-03-05	55	3	27.5	15.06	17.3	88.61	4
HFD+TXN	2019-03-12	55	3	29.5	23.43	18.6	95.27	5
HFD+TXN	2019-03-19	55	3	29.6	23.8	15.4	78.88	6
HFD+TXN	2019-03-26	55	3	30.9	29.3	15.6	79.9	7
HFD+TXN	2019-04-02	55	3	32.8	37.2	16.6	85.03	8
HFD+TXN	2019-04-09	55	3	33.3	39.33	14.8	75.81	9
HFD+TXN	2019-04-16	55	3	34.2	43.1	16.7	85.54	10
HFD+TXN	2019-04-23	55	3	35.5	48.54	16.8	86	11
HFD+TXN	2019-04-30	55	3	36.4	52.3	16	81.95	12
HFD+TXN	2019-05-07	55	3	36.5	52.72	16.4	84	13
HFD+TXN	2019-05-14	55	3	37.9	58.58	17.4	89.12	14
HFD+TXN	2019-05-21	55	3	39	63.18	18.1	92.71	15
HFD+TXN	2019-05-28	55	3	39.6	65.69	19.2	98.34	16
HFD+TXN	2019-02-04	56	3	27.5	0	25.5	130.6	0
HFD+TXN	2019-02-12	56	3	27.8	1.09	19.2	98.3	1
HFD+TXN	2019-02-19	56	3	28	1.82	27.7	141.9	2
HFD+TXN	2019-02-26	56	3	28.7	4.36	22.6	115.76	3
HFD+TXN	2019-03-05	56	3	28.9	5.09	16.4	84	4
HFD+TXN	2019-03-12	56	3	29.4	6.91	17.6	90.15	5
HFD+TXN	2019-03-19	56	3	29.7	8	16.7	85.54	6
HFD+TXN	2019-03-26	56	3	30.6	11.3	14.4	73.76	7
HFD+TXN	2019-04-02	56	3	32.3	17.5	16.1	82.46	8
HFD+TXN	2019-04-09	56	3	33	20	15.4	78.88	9
HFD+TXN	2019-04-16	56	3	34	23.64	16.4	84	10
HFD+TXN	2019-04-23	56	3	35.7	29.82	18.3	93.7	11
HFD+TXN	2019-04-30	56	3	36	30.91	15.5	79.39	12
HFD+TXN	2019-05-07	56	3	36.3	32	17.2	88.1	13
HFD+TXN	2019-05-14	56	3	37.5	36.36	19.3	98.85	14
HFD+TXN	2019-05-21	56	3	38.5	40	19.5	99.88	15
HFD+TXN	2019-05-28	56	3	39.6	44	22	112.68	16
HFD+TXN	2019-02-04	57	3	26.8	0	26.9	137.8	0
HFD+TXN	2019-02-12	57	3	28	4.48	26	133.2	1
HFD+TXN	2019-02-19	57	3	29.8	11.19	39.7	203.3	2
HFD+TXN	2019-02-26	57	3	31	15.67	27.1	138.81	3
HFD+TXN	2019-03-05	57	3	32.1	19.78	23	117.81	4
HFD+TXN	2019-03-12	57	3	32.7	22.01	24.6	126	5
HFD+TXN	2019-03-19	57	3	34.8	29.9	19.9	101.93	6
HFD+TXN	2019-03-26	57	3	37.9	41.4	20.4	104.49	7
HFD+TXN	2019-04-02	57	3	40	49.3	20.9	107.05	8
HFD+TXN	2019-04-09	57	3	40.8	52.24	18.3	93.73	9
HFD+TXN	2019-04-16	57	3	42.2	57.46	22.9	117.29	10
HFD+TXN	2019-04-23	57	3	45.6	70.15	25.1	128.6	11
HFD+TXN	2019-04-30	57	3	47.7	77.99	23.8	121.9	12
HFD+TXN	2019-05-07	57	3	49	82.84	22.5	115.2	13
HFD+TXN	2019-05-14	57	3	49.7	85.45	22.4	114.73	14
HFD+TXN	2019-05-21	57	3	51.1	90.67	23.4	119.85	15
HFD+TXN	2019-05-28	57	3	51.9	93.66	27.5	140.85	16
HFD+TXN	2019-02-04	58	3	25.1	0	23.3	119.3	0
HFD+TXN	2019-02-12	58	3	25.5	1.59	24.5	125.5	1
HFD+TXN	2019-02-19	58	3	26.3	4.78	22.1	113.2	2
HFD+TXN	2019-02-26	58	3	26.8	6.77	21	107.56	3
HFD+TXN	2019-03-05	58	3	27.1	7.97	18.2	93.22	4
HFD+TXN	2019-03-12	58	3	28.8	14.74	19.5	99.88	5
HFD+TXN	2019-03-19	58	3	30.1	19.9	19	97.32	6
HFD+TXN	2019-03-26	58	3	32.2	28.3	16.9	86.56	7
HFD+TXN	2019-04-02	58	3	34.9	39	17.7	90.66	8
HFD+TXN	2019-04-09	58	3	36	43.43	16.3	83.49	9
HFD+TXN	2019-04-16	58	3	36.5	45.42	18.5	94.76	10
HFD+TXN	2019-04-23	58	3	38.5	53.39	21.7	111.1	11
HFD+TXN	2019-04-30	58	3	40.4	60.96	20.2	103.46	12
HFD+TXN	2019-05-07	58	3	39.8	58.57	14.1	72.2	13
HFD+TXN	2019-05-14	58	3	40.6	61.75	19.1	97.83	14
HFD+TXN	2019-05-21	58	3	42.1	67.73	21.3	109.1	15
HFD+TXN	2019-05-28	58	3	43.3	72.51	21.8	111.66	16
HFD+TXN	2019-02-04	59	3	26.1	0	26.5	135.7	0
HFD+TXN	2019-02-12	59	3	25.5	-2.3	31.4	160.8	1
HFD+TXN	2019-02-19	59	3	25.3	-3.07	34.8	178.2	2
HFD+TXN	2019-02-26	59	3	26	-0.38	26.7	136.76	3
HFD+TXN	2019-03-05	59	3	27	3.45	28.7	147	4
HFD+TXN	2019-03-12	59	3	28	7.28	30.6	156.73	5
HFD+TXN	2019-03-19	59	3	28.5	9.2	14.4	73.76	6
HFD+TXN	2019-03-26	59	3	28.5	9.2	12.5	64.02	7
HFD+TXN	2019-04-02	59	3	30	14.9	17.1	87.59	8
HFD+TXN	2019-04-09	59	3	29.7	13.79	14.5	74.27	9
HFD+TXN	2019-04-16	59	3	30.7	17.62	22.1	113.2	10
HFD+TXN	2019-04-23	59	3	32.2	23.37	20.9	107	11
HFD+TXN	2019-04-30	59	3	33.6	28.74	18.1	92.71	12
HFD+TXN	2019-05-07	59	3	33.8	29.5	21	107.6	13
HFD+TXN	2019-05-14	59	3	33.6	28.74	29.8	152.64	14
HFD+TXN	2019-05-21	59	3	35	34.1	18.5	94.76	15
HFD+TXN	2019-05-28	59	3	34.7	32.95	29.5	151.1	16
HFD+TXN	2019-02-04	60	3	26.1	0	23.8	121.9	0
HFD+TXN	2019-02-12	60	3	26.3	0.77	29	148.5	1
HFD+TXN	2019-02-19	60	3	26.1	0	31.2	159.8	2
HFD+TXN	2019-02-26	60	3	26.5	1.53	23.2	118.83	3
HFD+TXN	2019-03-05	60	3	28	7.28	23.4	119.85	4
HFD+TXN	2019-03-12	60	3	28.6	9.58	24.7	126.51	5
HFD+TXN	2019-03-19	60	3	29.8	14.2	22.5	115.24	6
HFD+TXN	2019-03-26	60	3	31.3	19.9	22.4	114.73	7
HFD+TXN	2019-04-02	60	3	33.2	27.2	22.9	117.29	8
HFD+TXN	2019-04-09	60	3	33.2	27.2	16.3	83.49	9
HFD+TXN	2019-04-16	60	3	34.9	33.72	20.6	105.51	10
HFD+TXN	2019-04-23	60	3	36	37.93	20.8	106.5	11
HFD+TXN	2019-04-30	60	3	36.8	41	19.4	99.37	12
HFD+TXN	2019-05-07	60	3	37.5	43.68	20.8	106.5	13
HFD+TXN	2019-05-14	60	3	38.3	46.74	21.5	110.12	14
HFD+TXN	2019-05-21	60	3	39	49.43	19.8	101.42	15
HFD+TXN	2019-05-28	60	3	39.2	50.19	27.9	142.9	16
LFD	2019-02-04	1	4	27	0	26.11	92.6	0
LFD	2019-02-12	1	4	28.3	4.81	25.4	90.1	1
LFD	2019-02-19	1	4	28.9	7.04	19.7	69.9	2
LFD	2019-02-26	1	4	28.9	7.04	22.9	81.2	3
LFD	2019-03-05	1	4	29.9	10.74	24.2	85.81	4
LFD	2019-03-12	1	4	30.7	13.7	24	85.1	5
LFD	2019-03-19	1	4	31.6	17	23.4	82.98	6
LFD	2019-03-26	1	4	33.4	23.7	25	88.65	7
LFD	2019-04-02	1	4	34.1	26.3	24.3	86.17	8
LFD	2019-04-09	1	4	35	29.63	23	81.56	9
LFD	2019-04-16	1	4	35.1	30	17.9	63.47	10
LFD	2019-04-23	1	4	36.1	33.7	23.7	84	11
LFD	2019-04-30	1	4	36.6	35.56	29.3	103.9	12
LFD	2019-05-07	1	4	36.8	36.3	24	85.1	13
LFD	2019-05-14	1	4	37.8	40	24.1	85.46	14
LFD	2019-05-21	1	4	38.6	42.96	23.2	82.27	15
LFD	2019-05-28	1	4	38.4	42.22	21.9	77.66	16
LFD	2019-02-04	2	4	28	0	26.04	92.3	0
LFD	2019-02-12	2	4	28	0	20	70.9	1
LFD	2019-02-19	2	4	27.1	-3.21	15.5	55	2
LFD	2019-02-26	2	4	28.3	1.07	20.5	72.69	3
LFD	2019-03-05	2	4	28.5	1.79	21.3	75.53	4
LFD	2019-03-12	2	4	29.2	4.29	24.1	85.46	5
LFD	2019-03-19	2	4	27.9	-0.4	21.3	75.53	6
LFD	2019-03-26	2	4	27.7	-1.1	15.9	56.38	7
LFD	2019-04-02	2	4	28.3	1.1	19.1	67.73	8
LFD	2019-04-09	2	4	29.3	4.64	18	63.83	9
LFD	2019-04-16	2	4	28.9	3.21	15.8	56.03	10
LFD	2019-04-23	2	4	29.7	6.07	20.7	73.4	11
LFD	2019-04-30	2	4	30.4	8.57	22.7	80.49	12
LFD	2019-05-07	2	4	30.5	8.93	20.4	72.3	13
LFD	2019-05-14	2	4	32	14.29	22.6	80.14	14
LFD	2019-05-21	2	4	32.9	17.5	24	85.1	15
LFD	2019-05-28	2	4	33.1	18.21	22.1	78.37	16
LFD	2019-02-04	3	4	23.1	0	21.5	76.2	0
LFD	2019-02-12	3	4	23.8	3.03	25.2	89.4	1
LFD	2019-02-19	3	4	24.5	6.06	18.4	65.2	2
LFD	2019-02-26	3	4	25.6	10.82	21	74.47	3
LFD	2019-03-05	3	4	26.7	15.58	21.3	75.53	4
LFD	2019-03-12	3	4	27.8	20.35	23.2	82.27	5
LFD	2019-03-19	3	4	28.5	23.4	22.2	78.72	6
LFD	2019-03-26	3	4	29.6	28.1	20.5	72.69	7
LFD	2019-04-02	3	4	30.4	31.6	21.2	75.17	8
LFD	2019-04-09	3	4	31.4	35.93	21.6	76.59	9
LFD	2019-04-16	3	4	32.2	39.39	22	78.01	10
LFD	2019-04-23	3	4	33.4	44.59	22	78	11
LFD	2019-04-30	3	4	33.1	43.29	19.7	69.86	12
LFD	2019-05-07	3	4	34	47.19	21.2	75.2	13
LFD	2019-05-14	3	4	33.9	46.75	20.1	71.27	14
LFD	2019-05-21	3	4	36.1	56.28	24.4	86.52	15
LFD	2019-05-28	3	4	35.7	54.55	20.6	73.05	16
LFD	2019-02-04	4	4	25.9	0	26.61	94.4	0
LFD	2019-02-12	4	4	28.1	8.49	31.4	111.3	1
LFD	2019-02-19	4	4	27.9	7.72	25.6	90.8	2
LFD	2019-02-26	4	4	27.1	4.63	23.7	84.04	3
LFD	2019-03-05	4	4	27.3	5.41	26.5	93.97	4
LFD	2019-03-12	4	4	29	11.97	29.5	104.61	5
LFD	2019-03-19	4	4	30.4	17.4	30	106.38	6
LFD	2019-03-26	4	4	30.6	18.1	28	99.29	7
LFD	2019-04-02	4	4	31.8	22.8	29.2	103.54	8
LFD	2019-04-09	4	4	35.5	37.07	34	120.56	9
LFD	2019-04-16	4	4	35.7	37.84	30.8	109.22	10
LFD	2019-04-23	4	4	37.8	45.95	33.2	117.7	11
LFD	2019-04-30	4	4	39.2	51.35	32.7	115.95	12
LFD	2019-05-07	4	4	39.4	52.12	31	109.9	13
LFD	2019-05-14	4	4	41	58.3	32	113.47	14
LFD	2019-05-21	4	4	42.7	64.86	33.2	117.73	15
LFD	2019-05-28	4	4	43	66.02	33.6	119.14	16
LFD	2019-02-04	5	4	25.7	0	22.68	80.4	0
LFD	2019-02-12	5	4	25.4	-1.17	23.9	84.7	1
LFD	2019-02-19	5	4	25.5	-0.78	20.4	72.3	2
LFD	2019-02-26	5	4	25.6	-0.39	22	78.01	3
LFD	2019-03-05	5	4	26.1	1.56	21.5	76.24	4
LFD	2019-03-12	5	4	26.1	1.56	22.5	79.78	5
LFD	2019-03-19	5	4	27	5.1	21.7	76.95	6
LFD	2019-03-26	5	4	27.4	6.6	21.1	74.82	7
LFD	2019-04-02	5	4	28.4	10.5	23.6	83.68	8
LFD	2019-04-09	5	4	28.5	10.89	22.5	79.78	9
LFD	2019-04-16	5	4	29.1	13.23	22.7	80.49	10
LFD	2019-04-23	5	4	30	16.73	24.7	87.6	11
LFD	2019-04-30	5	4	30.2	17.51	23.6	83.68	12
LFD	2019-05-07	5	4	30.8	19.84	22.9	81.2	13
LFD	2019-05-14	5	4	31.3	21.79	21.9	77.66	14
LFD	2019-05-21	5	4	31.9	24.12	25.2	89.36	15
LFD	2019-05-28	5	4	32.2	25.29	24.5	86.88	16
LFD	2019-02-04	6	4	26.3	0	18.8	66.7	0
LFD	2019-02-12	6	4	26.5	0.76	19.8	70.2	1
LFD	2019-02-19	6	4	27.6	4.94	22.5	79.8	2
LFD	2019-02-26	6	4	29.7	12.93	23.2	82.27	3
LFD	2019-03-05	6	4	30.4	15.59	26.2	92.9	4
LFD	2019-03-12	6	4	30.6	16.35	23.9	84.75	5
LFD	2019-03-19	6	4	29	10.3	21.4	75.88	6
LFD	2019-03-26	6	4	31.3	19	22.5	79.78	7
LFD	2019-04-02	6	4	32.6	24	25.1	89	8
LFD	2019-04-09	6	4	34	29.28	24.9	88.29	9
LFD	2019-04-16	6	4	34.3	30.42	24.5	86.88	10
LFD	2019-04-23	6	4	35.6	35.36	25.5	90.4	11
LFD	2019-04-30	6	4	36.3	38.02	24.8	87.94	12
LFD	2019-05-07	6	4	37.3	41.83	24.4	86.5	13
LFD	2019-05-14	6	4	38.4	46.01	26.2	92.9	14
LFD	2019-05-21	6	4	38.3	45.63	24.8	87.94	15
LFD	2019-05-28	6	4	39.5	50.19	29.9	106.02	16
LFD	2019-02-04	7	4	25.6	0	24.1	85.5	0
LFD	2019-02-12	7	4	26.2	2.34	20.3	72	1
LFD	2019-02-19	7	4	27.6	7.81	21.4	75.9	2
LFD	2019-02-26	7	4	27.8	8.59	20.5	72.69	3
LFD	2019-03-05	7	4	28.3	10.55	20.9	74.11	4
LFD	2019-03-12	7	4	28.8	12.5	23.6	83.68	5
LFD	2019-03-19	7	4	28.5	11.3	20.5	72.69	6
LFD	2019-03-26	7	4	30	17.2	21.8	77.3	7
LFD	2019-04-02	7	4	30.7	19.9	21	74.47	8
LFD	2019-04-09	7	4	31.2	21.88	20.2	71.63	9
LFD	2019-04-16	7	4	31.6	23.44	20.9	74.11	10
LFD	2019-04-23	7	4	31.7	23.83	21.6	76.6	11
LFD	2019-04-30	7	4	32.1	25.39	22.2	78.72	12
LFD	2019-05-07	7	4	32	25	20.9	74.1	13
LFD	2019-05-14	7	4	33.4	30.47	22.1	78.37	14
LFD	2019-05-21	7	4	33.8	32.03	23.2	82.27	15
LFD	2019-05-28	7	4	34.3	33.98	23.3	82.62	16
LFD	2019-02-04	8	4	26	0	28.8	102.1	0
LFD	2019-02-12	8	4	27.2	4.62	28.8	102.1	1
LFD	2019-02-19	8	4	28.7	10.38	28.4	100.7	2
LFD	2019-02-26	8	4	26.8	3.08	23.6	83.68	3
LFD	2019-03-05	8	4	28.6	10	27	95.74	4
LFD	2019-03-12	8	4	30.5	17.31	29.4	104.25	5
LFD	2019-03-19	8	4	31.1	19.6	28.3	100.35	6
LFD	2019-03-26	8	4	32.9	26.5	27.5	97.51	7
LFD	2019-04-02	8	4	33.6	29.2	28.1	99.64	8
LFD	2019-04-09	8	4	35.7	37.31	29.6	104.96	9
LFD	2019-04-16	8	4	35.3	35.77	27.3	96.8	10
LFD	2019-04-23	8	4	38.5	48.08	32.6	115.6	11
LFD	2019-04-30	8	4	39.2	50.77	30	106.38	12
LFD	2019-05-07	8	4	38.8	49.23	28.3	100.4	13
LFD	2019-05-14	8	4	40.7	56.54	30.7	108.86	14
LFD	2019-05-21	8	4	43	65.38	33.3	118.08	15
LFD	2019-05-28	8	4	43.3	66.54	34.9	123.75	16
LFD	2019-02-04	9	4	26.2	0	22.7	80.5	0
LFD	2019-02-12	9	4	26.8	2.29	20.4	72.3	1
LFD	2019-02-19	9	4	27.5	4.96	22.3	79.1	2
LFD	2019-02-26	9	4	28.5	8.78	23.2	82.27	3
LFD	2019-03-05	9	4	29.2	11.45	21.3	75.53	4
LFD	2019-03-12	9	4	29.3	11.83	25.4	90.07	5
LFD	2019-03-19	9	4	30.3	15.6	24.7	87.59	6
LFD	2019-03-26	9	4	31.9	21.8	23.7	84.04	7
LFD	2019-04-02	9	4	34.2	30.5	25.8	91.49	8
LFD	2019-04-09	9	4	33.8	29.01	23.7	84.04	9
LFD	2019-04-16	9	4	34.3	30.92	24.9	88.29	10
LFD	2019-04-23	9	4	36.4	38.93	28.8	102.1	11
LFD	2019-04-30	9	4	37.8	44.27	31.2	110.63	12
LFD	2019-05-07	9	4	39.1	49.24	27.5	97.5	13
LFD	2019-05-14	9	4	38.8	48.09	26	92.2	14
LFD	2019-05-21	9	4	39.7	51.53	28	99.29	15
LFD	2019-05-28	9	4	40.5	54.58	33.5	118.79	16
LFD	2019-02-04	10	4	23.7	0	22.6	80.1	0
LFD	2019-02-12	10	4	24.3	2.53	20.6	73	1
LFD	2019-02-19	10	4	23.8	0.42	18.2	64.5	2
LFD	2019-02-26	10	4	24	1.27	19	67.37	3
LFD	2019-03-05	10	4	25.7	8.44	22.1	78.37	4
LFD	2019-03-12	10	4	26.3	10.97	25	88.65	5
LFD	2019-03-19	10	4	27.5	16	23.1	81.91	6
LFD	2019-03-26	10	4	26.7	12.7	17.1	60.64	7
LFD	2019-04-02	10	4	27.6	16.5	21.6	76.59	8
LFD	2019-04-09	10	4	28.2	18.99	21.8	77.3	9
LFD	2019-04-16	10	4	29.1	22.78	23.6	83.68	10
LFD	2019-04-23	10	4	30.3	27.85	21.4	75.9	11
LFD	2019-04-30	10	4	30.8	29.96	28.4	100.71	12
LFD	2019-05-07	10	4	31.1	31.22	21.9	77.7	13
LFD	2019-05-14	10	4	32.2	35.86	24	85.1	14
LFD	2019-05-21	10	4	33.6	41.77	24.6	87.23	15
LFD	2019-05-28	10	4	34.2	44.3	30.1	106.73	16
LFD	2019-02-04	11	4	25.7	0	27	95.7	0
LFD	2019-02-12	11	4	26.1	1.56	18.9	67	1
LFD	2019-02-19	11	4	27	5.06	20.8	73.8	2
LFD	2019-02-26	11	4	28.1	9.34	20.3	71.98	3
LFD	2019-03-05	11	4	28.5	10.89	21.8	77.3	4
LFD	2019-03-12	11	4	28.3	10.12	20.8	73.76	5
LFD	2019-03-19	11	4	28.6	11.3	21.9	77.66	6
LFD	2019-03-26	11	4	30.6	19.1	21.9	77.66	7
LFD	2019-04-02	11	4	31.5	22.6	20.9	74.11	8
LFD	2019-04-09	11	4	31.2	21.4	21	74.47	9
LFD	2019-04-16	11	4	31.8	23.74	22	78.01	10
LFD	2019-04-23	11	4	32.4	26.07	23.1	81.9	11
LFD	2019-04-30	11	4	33.4	29.96	24.2	85.81	12
LFD	2019-05-07	11	4	34.1	32.68	21.8	77.3	13
LFD	2019-05-14	11	4	34.3	33.46	21.6	76.59	14
LFD	2019-05-21	11	4	35.9	39.69	25	88.65	15
LFD	2019-05-28	11	4	36.6	42.41	29.6	104.96	16
LFD	2019-02-04	12	4	25.9	0	25.3	89.7	0
LFD	2019-02-12	12	4	27.7	6.95	22	78	1
LFD	2019-02-19	12	4	28.2	8.88	21.9	77.7	2
LFD	2019-02-26	12	4	30.1	16.22	23.8	84.39	3
LFD	2019-03-05	12	4	30.1	16.22	23	81.56	4
LFD	2019-03-12	12	4	30.2	16.6	23.6	83.68	5
LFD	2019-03-19	12	4	31	19.7	25.7	91.13	6
LFD	2019-03-26	12	4	32.5	25.5	22.7	80.49	7
LFD	2019-04-02	12	4	33.3	28.6	22.2	78.72	8
LFD	2019-04-09	12	4	35	35.14	22.5	79.78	9
LFD	2019-04-16	12	4	35	35.14	23.1	81.91	10
LFD	2019-04-23	12	4	36.6	41.31	25.4	90.1	11
LFD	2019-04-30	12	4	36.5	40.93	22.5	79.78	12
LFD	2019-05-07	12	4	36.6	41.31	22.8	80.8	13
LFD	2019-05-14	12	4	37.4	44.4	24.9	88.29	14
LFD	2019-05-21	12	4	38.8	49.81	26.8	95.03	15
LFD	2019-05-28	12	4	39.2	51.35	34	120.56	16

## Sheet: weekly_data
ID	Treatment	Weight	Weight_gain_percent	Food_Intake_weekly	Calories_weekly	Date	Week
1	LFD	27	0	26.11	92.6	2019-02-04	0
2	LFD	28	0	26.04	92.3	2019-02-04	0
3	LFD	23.1	0	21.5	76.2	2019-02-04	0
4	LFD	25.9	0	26.61	94.4	2019-02-04	0
5	LFD	25.7	0	22.68	80.4	2019-02-04	0
6	LFD	26.3	0	18.8	66.7	2019-02-04	0
7	LFD	25.6	0	24.1	85.5	2019-02-04	0
8	LFD	26	0	28.8	102.1	2019-02-04	0
9	LFD	26.2	0	22.7	80.5	2019-02-04	0
10	LFD	23.7	0	22.6	80.1	2019-02-04	0
11	LFD	25.7	0	27	95.7	2019-02-04	0
12	LFD	25.9	0	25.3	89.7	2019-02-04	0
13	HFD	24.3	0	21.8	111.7	2019-02-04	0
14	HFD	23.8	0	26.41	135.3	2019-02-04	0
15	HFD	25.4	0	24.46	125.3	2019-02-04	0
16	HFD	27.5	0	24.73	126.7	2019-02-04	0
17	HFD	24.5	0	20.16	103.3	2019-02-04	0
18	HFD	25.4	0	25.88	132.6	2019-02-04	0
19	HFD	26.1	0	27.9	142.9	2019-02-04	0
20	HFD	26.2	0	26.9	137.8	2019-02-04	0
21	HFD	26	0	24.2	124	2019-02-04	0
22	HFD	25.6	0	23.4	119.9	2019-02-04	0
23	HFD	24.2	0	27.1	138.8	2019-02-04	0
24	HFD	25.5	0	23.6	120.9	2019-02-04	0
25	HFD+LXN	27.4	0	20.91	107.1	2019-02-04	0
26	HFD+LXN	26.1	0	16.41	84.1	2019-02-04	0
27	HFD+LXN	25.8	0	25.78	132	2019-02-04	0
28	HFD+LXN	26.1	0	26.22	134.3	2019-02-04	0
29	HFD+LXN	26.1	0	24.76	126.8	2019-02-04	0
30	HFD+LXN	25.4	0	24.27	124.3	2019-02-04	0
31	HFD+LXN	27.2	0	30.1	154.2	2019-02-04	0
32	HFD+LXN	25.2	0	25.9	132.7	2019-02-04	0
33	HFD+LXN	29	0	27.2	139.3	2019-02-04	0
34	HFD+LXN	26.5	0	22.2	113.7	2019-02-04	0
35	HFD+LXN	25.4	0	22.9	117.3	2019-02-04	0
36	HFD+LXN	23.6	0	23	117.8	2019-02-04	0
37	HFD+HXN	27.8	0	24.54	125.7	2019-02-04	0
38	HFD+HXN	23.8	0	21.25	108.8	2019-02-04	0
39	HFD+HXN	24.8	0	21.38	109.5	2019-02-04	0
40	HFD+HXN	25.1	0	19.3	98.9	2019-02-04	0
41	HFD+HXN	25.1	0	20.12	103.1	2019-02-04	0
42	HFD+HXN	26.8	0	22.72	116.4	2019-02-04	0
43	HFD+HXN	25.1	0	23.9	122.4	2019-02-04	0
44	HFD+HXN	24.7	0	24.6	126	2019-02-04	0
45	HFD+HXN	25.4	0	26.6	136.2	2019-02-04	0
46	HFD+HXN	23.7	0	22.3	114.2	2019-02-04	0
47	HFD+HXN	27.3	0	23.2	118.8	2019-02-04	0
48	HFD+HXN	23.7	0	23.2	118.8	2019-02-04	0
49	HFD+TXN	26	0	20.36	104.3	2019-02-04	0
51	HFD+TXN	25	0	24.04	123.1	2019-02-04	0
52	HFD+TXN	24.5	0	24.43	125.1	2019-02-04	0
53	HFD+TXN	26.5	0	25.61	131.2	2019-02-04	0
54	HFD+TXN	21.9	0	24.38	124.9	2019-02-04	0
55	HFD+TXN	23.9	0	23.4	119.9	2019-02-04	0
56	HFD+TXN	27.5	0	25.5	130.6	2019-02-04	0
57	HFD+TXN	26.8	0	26.9	137.8	2019-02-04	0
58	HFD+TXN	25.1	0	23.3	119.3	2019-02-04	0
59	HFD+TXN	26.1	0	26.5	135.7	2019-02-04	0
60	HFD+TXN	26.1	0	23.8	121.9	2019-02-04	0
1	LFD	28.3	4.81	25.4	90.1	2019-02-12	1
2	LFD	28	0	20	70.9	2019-02-12	1
3	LFD	23.8	3.03	25.2	89.4	2019-02-12	1
4	LFD	28.1	8.49	31.4	111.3	2019-02-12	1
5	LFD	25.4	-1.17	23.9	84.7	2019-02-12	1
6	LFD	26.5	0.76	19.8	70.2	2019-02-12	1
7	LFD	26.2	2.34	20.3	72	2019-02-12	1
8	LFD	27.2	4.62	28.8	102.1	2019-02-12	1
9	LFD	26.8	2.29	20.4	72.3	2019-02-12	1
10	LFD	24.3	2.53	20.6	73	2019-02-12	1
11	LFD	26.1	1.56	18.9	67	2019-02-12	1
12	LFD	27.7	6.95	22	78	2019-02-12	1
13	HFD	25.7	5.76	16.3	83.5	2019-02-12	1
14	HFD	28.2	18.49	25.4	130.1	2019-02-12	1
15	HFD	27.4	7.87	17	87.1	2019-02-12	1
16	HFD	29.1	5.82	19.3	98.9	2019-02-12	1
17	HFD	28.1	14.69	18.7	95.8	2019-02-12	1
18	HFD	27.2	7.09	15.6	79.9	2019-02-12	1
19	HFD	26.7	2.3	16.5	84.5	2019-02-12	1
20	HFD	28.7	9.54	14.7	75.3	2019-02-12	1
21	HFD	29.2	12.31	19.5	99.9	2019-02-12	1
22	HFD	27.4	7.03	18	92.2	2019-02-12	1
23	HFD	24.6	1.65	17.1	87.6	2019-02-12	1
24	HFD	27.4	7.45	17.1	87.6	2019-02-12	1
25	HFD+LXN	27.3	-0.36	15.6	79.9	2019-02-12	1
26	HFD+LXN	28.7	9.96	19	97.3	2019-02-12	1
27	HFD+LXN	27.4	6.2	18	92.2	2019-02-12	1
28	HFD+LXN	29.2	11.88	18.4	94.2	2019-02-12	1
29	HFD+LXN	29.2	11.88	15.3	78.4	2019-02-12	1
30	HFD+LXN	28.2	11.02	10.9	55.8	2019-02-12	1
31	HFD+LXN	29.7	9.19	19.8	101.4	2019-02-12	1
32	HFD+LXN	27.3	8.33	14.5	74.3	2019-02-12	1
33	HFD+LXN	32.3	11.38	10.1	51.7	2019-02-12	1
34	HFD+LXN	27.6	4.15	17.7	90.7	2019-02-12	1
35	HFD+LXN	27.4	7.87	14.3	73.2	2019-02-12	1
36	HFD+LXN	23.8	0.85	16.7	85.5	2019-02-12	1
37	HFD+HXN	27.7	-0.36	11.5	58.9	2019-02-12	1
38	HFD+HXN	25	5.04	12	61.5	2019-02-12	1
39	HFD+HXN	26.7	7.66	18.6	95.3	2019-02-12	1
40	HFD+HXN	26.8	6.77	11.9	61	2019-02-12	1
41	HFD+HXN	26	3.59	16.6	85	2019-02-12	1
42	HFD+HXN	31.5	17.54	13.5	69.1	2019-02-12	1
43	HFD+HXN	26.6	5.98	16.4	84	2019-02-12	1
44	HFD+HXN	25.8	4.45	18.9	96.8	2019-02-12	1
45	HFD+HXN	27.9	9.84	13.7	70.2	2019-02-12	1
46	HFD+HXN	25.6	8.02	13.6	69.7	2019-02-12	1
47	HFD+HXN	29.6	8.42	18.1	92.7	2019-02-12	1
48	HFD+HXN	24.8	4.64	17.4	89.1	2019-02-12	1
49	HFD+TXN	27.2	4.62	13.9	71.2	2019-02-12	1
51	HFD+TXN	25.7	2.8	17.9	91.7	2019-02-12	1
52	HFD+TXN	25.5	4.08	16.9	86.6	2019-02-12	1
53	HFD+TXN	28.1	6.04	15.5	79.4	2019-02-12	1
54	HFD+TXN	22	0.46	10.7	54.8	2019-02-12	1
55	HFD+TXN	25.8	7.95	18.4	94.2	2019-02-12	1
56	HFD+TXN	27.8	1.09	19.2	98.3	2019-02-12	1
57	HFD+TXN	28	4.48	26	133.2	2019-02-12	1
58	HFD+TXN	25.5	1.59	24.5	125.5	2019-02-12	1
59	HFD+TXN	25.5	-2.3	31.4	160.8	2019-02-12	1
60	HFD+TXN	26.3	0.77	29	148.5	2019-02-12	1
1	LFD	28.9	7.04	19.7	69.9	2019-02-19	2
2	LFD	27.1	-3.21	15.5	55	2019-02-19	2
3	LFD	24.5	6.06	18.4	65.2	2019-02-19	2
4	LFD	27.9	7.72	25.6	90.8	2019-02-19	2
5	LFD	25.5	-0.78	20.4	72.3	2019-02-19	2
6	LFD	27.6	4.94	22.5	79.8	2019-02-19	2
7	LFD	27.6	7.81	21.4	75.9	2019-02-19	2
8	LFD	28.7	10.38	28.4	100.7	2019-02-19	2
9	LFD	27.5	4.96	22.3	79.1	2019-02-19	2
10	LFD	23.8	0.42	18.2	64.5	2019-02-19	2
11	LFD	27	5.06	20.8	73.8	2019-02-19	2
12	LFD	28.2	8.88	21.9	77.7	2019-02-19	2
13	HFD	26.9	10.7	18.3	93.7	2019-02-19	2
14	HFD	29.9	25.63	23	117.8	2019-02-19	2
15	HFD	29.7	16.93	18.7	95.8	2019-02-19	2
16	HFD	31.8	15.64	22	112.7	2019-02-19	2
17	HFD	29	18.37	18.4	94.2	2019-02-19	2
18	HFD	28.2	11.02	17.7	90.7	2019-02-19	2
19	HFD	28	7.28	19	97.3	2019-02-19	2
20	HFD	30.9	17.94	21.9	112.2	2019-02-19	2
21	HFD	32.7	25.77	21	107.6	2019-02-19	2
22	HFD	28.7	12.11	18.2	93.2	2019-02-19	2
23	HFD	25.9	7.02	19.4	99.4	2019-02-19	2
24	HFD	29.2	14.51	19.6	100.4	2019-02-19	2
25	HFD+LXN	29.5	7.66	20.2	103.5	2019-02-19	2
26	HFD+LXN	29.5	13.03	20.2	103.5	2019-02-19	2
27	HFD+LXN	30.2	17.05	23.7	121.4	2019-02-19	2
28	HFD+LXN	32.1	22.99	24	122.9	2019-02-19	2
29	HFD+LXN	30.8	18.01	20.9	107	2019-02-19	2
30	HFD+LXN	30	18.11	20.8	106.5	2019-02-19	2
31	HFD+LXN	31.8	16.91	25.3	129.6	2019-02-19	2
32	HFD+LXN	29.3	16.27	20.6	105.5	2019-02-19	2
33	HFD+LXN	34.8	20	24	122.9	2019-02-19	2
34	HFD+LXN	29.2	10.19	20.9	107	2019-02-19	2
35	HFD+LXN	28.4	11.81	21.1	108.1	2019-02-19	2
36	HFD+LXN	24.9	5.51	20.7	106	2019-02-19	2
37	HFD+HXN	28	0.72	17.4	89.1	2019-02-19	2
38	HFD+HXN	25.8	8.4	19.2	98.3	2019-02-19	2
39	HFD+HXN	29.4	18.55	21.8	111.7	2019-02-19	2
40	HFD+HXN	27	7.57	21.9	112.2	2019-02-19	2
41	HFD+HXN	28.1	11.95	20	102.4	2019-02-19	2
42	HFD+HXN	32.4	20.9	21.8	111.7	2019-02-19	2
43	HFD+HXN	27.3	8.76	18.6	95.3	2019-02-19	2
44	HFD+HXN	27.2	10.12	19.8	101.4	2019-02-19	2
45	HFD+HXN	28.5	12.2	18.9	96.8	2019-02-19	2
46	HFD+HXN	26.4	11.39	17	87.1	2019-02-19	2
47	HFD+HXN	31.5	15.38	20	102.4	2019-02-19	2
48	HFD+HXN	26.5	11.81	20.4	104.5	2019-02-19	2
49	HFD+TXN	27.6	6.15	20.5	105	2019-02-19	2
51	HFD+TXN	27	8	19.3	98.9	2019-02-19	2
52	HFD+TXN	26	6.12	21.7	111.1	2019-02-19	2
53	HFD+TXN	29	9.43	21.9	112.2	2019-02-19	2
54	HFD+TXN	22.1	0.91	16.8	86	2019-02-19	2
55	HFD+TXN	26.4	10.46	18.9	96.8	2019-02-19	2
56	HFD+TXN	28	1.82	27.7	141.9	2019-02-19	2
57	HFD+TXN	29.8	11.19	39.7	203.3	2019-02-19	2
58	HFD+TXN	26.3	4.78	22.1	113.2	2019-02-19	2
59	HFD+TXN	25.3	-3.07	34.8	178.2	2019-02-19	2
60	HFD+TXN	26.1	0	31.2	159.8	2019-02-19	2
1	LFD	28.9	7.04	22.9	81.2	2019-02-26	3
2	LFD	28.3	1.07	20.5	72.69	2019-02-26	3
3	LFD	25.6	10.82	21	74.47	2019-02-26	3
4	LFD	27.1	4.63	23.7	84.04	2019-02-26	3
5	LFD	25.6	-0.39	22	78.01	2019-02-26	3
6	LFD	29.7	12.93	23.2	82.27	2019-02-26	3
7	LFD	27.8	8.59	20.5	72.69	2019-02-26	3
8	LFD	26.8	3.08	23.6	83.68	2019-02-26	3
9	LFD	28.5	8.78	23.2	82.27	2019-02-26	3
10	LFD	24	1.27	19	67.37	2019-02-26	3
11	LFD	28.1	9.34	20.3	71.98	2019-02-26	3
12	LFD	30.1	16.22	23.8	84.39	2019-02-26	3
13	HFD	29.4	20.99	20.8	106.54	2019-02-26	3
14	HFD	32.2	35.29	22.5	115.24	2019-02-26	3
15	HFD	32.1	26.38	19.6	100.39	2019-02-26	3
16	HFD	33.8	22.91	20.1	102.95	2019-02-26	3
17	HFD	31	26.53	19.1	97.83	2019-02-26	3
18	HFD	29.8	17.32	18.7	95.78	2019-02-26	3
19	HFD	29.2	11.88	18.8	96.29	2019-02-26	3
20	HFD	32.2	22.9	20.3	103.98	2019-02-26	3
21	HFD	34.5	32.69	19.9	101.93	2019-02-26	3
22	HFD	30.1	17.58	18.1	92.71	2019-02-26	3
23	HFD	27.3	12.81	19.9	101.93	2019-02-26	3
24	HFD	32.1	25.88	20.7	106.03	2019-02-26	3
25	HFD+LXN	29.3	6.93	17.8	91.17	2019-02-26	3
26	HFD+LXN	30.6	17.24	19.1	97.83	2019-02-26	3
27	HFD+LXN	31.4	21.71	20.4	104.49	2019-02-26	3
28	HFD+LXN	34.6	32.57	22.1	113.2	2019-02-26	3
29	HFD+LXN	30.6	17.24	17.6	90.15	2019-02-26	3
30	HFD+LXN	32.5	27.95	21.5	110.12	2019-02-26	3
31	HFD+LXN	34.8	27.94	23	117.81	2019-02-26	3
32	HFD+LXN	31	23.02	20.4	104.49	2019-02-26	3
33	HFD+LXN	36.8	26.9	22.9	117.29	2019-02-26	3
34	HFD+LXN	30.2	13.96	20.8	106.54	2019-02-26	3
35	HFD+LXN	30.1	18.5	20.6	105.51	2019-02-26	3
36	HFD+LXN	25.5	8.05	14.4	73.76	2019-02-26	3
37	HFD+HXN	28.8	3.6	18.7	95.78	2019-02-26	3
38	HFD+HXN	27.2	14.29	20.5	105	2019-02-26	3
39	HFD+HXN	31.8	28.23	20.4	104.49	2019-02-26	3
40	HFD+HXN	28.3	12.75	22.8	116.78	2019-02-26	3
41	HFD+HXN	29.4	17.13	19.9	101.93	2019-02-26	3
42	HFD+HXN	33.5	25	19.7	100.9	2019-02-26	3
43	HFD+HXN	28	11.55	15.7	80.42	2019-02-26	3
44	HFD+HXN	28.2	14.17	19.8	101.42	2019-02-26	3
45	HFD+HXN	28.8	13.39	17.5	89.63	2019-02-26	3
46	HFD+HXN	27.3	15.19	16.9	86.56	2019-02-26	3
47	HFD+HXN	34	24.54	21.1	108.07	2019-02-26	3
48	HFD+HXN	28.5	20.25	20.7	106.03	2019-02-26	3
49	HFD+TXN	27.6	6.15	19.8	101.42	2019-02-26	3
51	HFD+TXN	28.3	13.2	19.2	98.34	2019-02-26	3
52	HFD+TXN	26.3	7.35	15.8	80.93	2019-02-26	3
53	HFD+TXN	30	13.21	18.3	93.73	2019-02-26	3
54	HFD+TXN	22.5	2.74	19.3	98.85	2019-02-26	3
55	HFD+TXN	26.4	10.46	16.2	82.98	2019-02-26	3
56	HFD+TXN	28.7	4.36	22.6	115.76	2019-02-26	3
57	HFD+TXN	31	15.67	27.1	138.81	2019-02-26	3
58	HFD+TXN	26.8	6.77	21	107.56	2019-02-26	3
59	HFD+TXN	26	-0.38	26.7	136.76	2019-02-26	3
60	HFD+TXN	26.5	1.53	23.2	118.83	2019-02-26	3
1	LFD	29.9	10.74	24.2	85.81	2019-03-05	4
2	LFD	28.5	1.79	21.3	75.53	2019-03-05	4
3	LFD	26.7	15.58	21.3	75.53	2019-03-05	4
4	LFD	27.3	5.41	26.5	93.97	2019-03-05	4
5	LFD	26.1	1.56	21.5	76.24	2019-03-05	4
6	LFD	30.4	15.59	26.2	92.9	2019-03-05	4
7	LFD	28.3	10.55	20.9	74.11	2019-03-05	4
8	LFD	28.6	10	27	95.74	2019-03-05	4
9	LFD	29.2	11.45	21.3	75.53	2019-03-05	4
10	LFD	25.7	8.44	22.1	78.37	2019-03-05	4
11	LFD	28.5	10.89	21.8	77.3	2019-03-05	4
12	LFD	30.1	16.22	23	81.56	2019-03-05	4
13	HFD	30.3	24.69	20.2	103.46	2019-03-05	4
14	HFD	33.3	39.92	21.9	112.17	2019-03-05	4
15	HFD	34.8	37.01	19.6	100.39	2019-03-05	4
16	HFD	34.7	26.18	19.4	99.37	2019-03-05	4
17	HFD	32.4	32.24	18.6	95.27	2019-03-05	4
18	HFD	30.7	20.87	18.1	92.71	2019-03-05	4
19	HFD	29.1	11.49	15.5	79.39	2019-03-05	4
20	HFD	33.2	26.72	18.4	94.24	2019-03-05	4
21	HFD	36.7	41.15	18.4	94.24	2019-03-05	4
22	HFD	33.5	30.86	20.5	105	2019-03-05	4
23	HFD	28	15.7	19.1	97.83	2019-03-05	4
24	HFD	33.4	30.98	20.9	107.05	2019-03-05	4
25	HFD+LXN	31.7	15.69	20.8	106.54	2019-03-05	4
26	HFD+LXN	32.6	24.9	19.7	100.9	2019-03-05	4
27	HFD+LXN	34.5	33.72	22.4	114.73	2019-03-05	4
28	HFD+LXN	36.4	39.46	21.2	108.59	2019-03-05	4
29	HFD+LXN	32.6	24.9	21.3	109.1	2019-03-05	4
30	HFD+LXN	34.5	35.83	20.5	105	2019-03-05	4
31	HFD+LXN	35.8	31.62	20.4	104.49	2019-03-05	4
32	HFD+LXN	31.6	25.4	17.5	89.63	2019-03-05	4
33	HFD+LXN	38.7	33.45	19.6	100.39	2019-03-05	4
34	HFD+LXN	31.2	17.74	19.7	100.9	2019-03-05	4
35	HFD+LXN	32.6	28.35	20	102.44	2019-03-05	4
36	HFD+LXN	26	10.17	16.5	84.51	2019-03-05	4
37	HFD+HXN	29.6	6.47	18.3	93.73	2019-03-05	4
38	HFD+HXN	28.1	18.07	19.4	99.37	2019-03-05	4
39	HFD+HXN	33	33.06	20.9	107.05	2019-03-05	4
40	HFD+HXN	29.3	16.73	19.4	99.37	2019-03-05	4
41	HFD+HXN	31.6	25.9	22.7	116.27	2019-03-05	4
42	HFD+HXN	36	34.33	22	112.68	2019-03-05	4
43	HFD+HXN	28.8	14.74	16.2	82.98	2019-03-05	4
44	HFD+HXN	29.4	19.03	17	87.07	2019-03-05	4
45	HFD+HXN	29.1	14.57	16.7	85.54	2019-03-05	4
46	HFD+HXN	28.3	19.41	17	87.07	2019-03-05	4
47	HFD+HXN	35.2	28.94	17.8	91.17	2019-03-05	4
48	HFD+HXN	30.7	29.54	21.2	108.59	2019-03-05	4
49	HFD+TXN	28.6	10	18.2	93.22	2019-03-05	4
51	HFD+TXN	28.9	15.6	17.3	88.61	2019-03-05	4
52	HFD+TXN	26.8	9.39	23.4	119.85	2019-03-05	4
53	HFD+TXN	30.4	14.72	20	102.44	2019-03-05	4
54	HFD+TXN	23.5	7.31	19.2	98.34	2019-03-05	4
55	HFD+TXN	27.5	15.06	17.3	88.61	2019-03-05	4
56	HFD+TXN	28.9	5.09	16.4	84	2019-03-05	4
57	HFD+TXN	32.1	19.78	23	117.81	2019-03-05	4
58	HFD+TXN	27.1	7.97	18.2	93.22	2019-03-05	4
59	HFD+TXN	27	3.45	28.7	147	2019-03-05	4
60	HFD+TXN	28	7.28	23.4	119.85	2019-03-05	4
1	LFD	30.7	13.7	24	85.1	2019-03-12	5
2	LFD	29.2	4.29	24.1	85.46	2019-03-12	5
3	LFD	27.8	20.35	23.2	82.27	2019-03-12	5
4	LFD	29	11.97	29.5	104.61	2019-03-12	5
5	LFD	26.1	1.56	22.5	79.78	2019-03-12	5
6	LFD	30.6	16.35	23.9	84.75	2019-03-12	5
7	LFD	28.8	12.5	23.6	83.68	2019-03-12	5
8	LFD	30.5	17.31	29.4	104.25	2019-03-12	5
9	LFD	29.3	11.83	25.4	90.07	2019-03-12	5
10	LFD	26.3	10.97	25	88.65	2019-03-12	5
11	LFD	28.3	10.12	20.8	73.76	2019-03-12	5
12	LFD	30.2	16.6	23.6	83.68	2019-03-12	5
13	HFD	31.5	29.63	20.6	105.51	2019-03-12	5
14	HFD	35.8	50.42	22.8	116.78	2019-03-12	5
15	HFD	35.7	40.55	18.1	92.71	2019-03-12	5
16	HFD	36	30.91	18.9	96.81	2019-03-12	5
17	HFD	34.1	39.18	19.9	101.93	2019-03-12	5
18	HFD	32.8	29.13	20.4	104.49	2019-03-12	5
19	HFD	30.7	17.62	19.4	99.37	2019-03-12	5
20	HFD	35.4	35.11	20.6	105.51	2019-03-12	5
21	HFD	38.6	48.46	20.5	105	2019-03-12	5
22	HFD	34.1	33.2	14.3	73.24	2019-03-12	5
23	HFD	29.2	20.66	19.6	100.39	2019-03-12	5
24	HFD	35.6	39.61	19.9	101.93	2019-03-12	5
25	HFD+LXN	32.6	18.98	19.1	97.83	2019-03-12	5
26	HFD+LXN	34.4	31.8	21.7	111.15	2019-03-12	5
27	HFD+LXN	36	39.53	21.7	111.15	2019-03-12	5
28	HFD+LXN	38	45.59	21.8	111.66	2019-03-12	5
29	HFD+LXN	32.8	25.67	19.3	98.85	2019-03-12	5
30	HFD+LXN	36.1	42.13	19.6	100.39	2019-03-12	5
31	HFD+LXN	36.4	33.82	23.4	119.85	2019-03-12	5
32	HFD+LXN	32.2	27.78	18.2	93.22	2019-03-12	5
33	HFD+LXN	39.3	35.52	19.5	99.88	2019-03-12	5
34	HFD+LXN	30.9	16.6	16.4	84	2019-03-12	5
35	HFD+LXN	33.1	30.31	22.6	115.76	2019-03-12	5
36	HFD+LXN	26.3	11.44	17.2	88.1	2019-03-12	5
37	HFD+HXN	31	11.51	17.8	91.17	2019-03-12	5
38	HFD+HXN	30	26.05	19.96	102.24	2019-03-12	5
39	HFD+HXN	34.7	39.92	19.2	98.34	2019-03-12	5
40	HFD+HXN	29.5	17.53	16.4	84	2019-03-12	5
41	HFD+HXN	33	31.47	18.6	95.27	2019-03-12	5
42	HFD+HXN	36.4	35.82	20.4	104.49	2019-03-12	5
43	HFD+HXN	30	19.52	15.6	79.9	2019-03-12	5
44	HFD+HXN	30.7	24.29	20.1	102.95	2019-03-12	5
45	HFD+HXN	30.5	20.08	17.3	88.61	2019-03-12	5
46	HFD+HXN	29.5	24.47	18	92.2	2019-03-12	5
47	HFD+HXN	36.7	34.43	19.1	97.83	2019-03-12	5
48	HFD+HXN	32.1	35.44	21.4	109.61	2019-03-12	5
49	HFD+TXN	29	11.54	22.3	114.22	2019-03-12	5
51	HFD+TXN	30.4	21.6	17.7	90.66	2019-03-12	5
52	HFD+TXN	27.4	11.84	15.9	81.44	2019-03-12	5
53	HFD+TXN	32	20.75	19.4	99.37	2019-03-12	5
54	HFD+TXN	24.1	10.05	17.7	90.66	2019-03-12	5
55	HFD+TXN	29.5	23.43	18.6	95.27	2019-03-12	5
56	HFD+TXN	29.4	6.91	17.6	90.15	2019-03-12	5
57	HFD+TXN	32.7	22.01	24.6	126	2019-03-12	5
58	HFD+TXN	28.8	14.74	19.5	99.88	2019-03-12	5
59	HFD+TXN	28	7.28	30.6	156.73	2019-03-12	5
60	HFD+TXN	28.6	9.58	24.7	126.51	2019-03-12	5
1	LFD	31.6	17	23.4	82.98	2019-03-19	6
2	LFD	27.9	-0.4	21.3	75.53	2019-03-19	6
3	LFD	28.5	23.4	22.2	78.72	2019-03-19	6
4	LFD	30.4	17.4	30	106.38	2019-03-19	6
5	LFD	27	5.1	21.7	76.95	2019-03-19	6
6	LFD	29	10.3	21.4	75.88	2019-03-19	6
7	LFD	28.5	11.3	20.5	72.69	2019-03-19	6
8	LFD	31.1	19.6	28.3	100.35	2019-03-19	6
9	LFD	30.3	15.6	24.7	87.59	2019-03-19	6
10	LFD	27.5	16	23.1	81.91	2019-03-19	6
11	LFD	28.6	11.3	21.9	77.66	2019-03-19	6
12	LFD	31	19.7	25.7	91.13	2019-03-19	6
13	HFD	32.6	34.2	19.5	99.88	2019-03-19	6
14	HFD	38.5	61.8	21.8	111.66	2019-03-19	6
15	HFD	38.8	52.8	20.5	105	2019-03-19	6
16	HFD	37.8	37.5	19.4	99.37	2019-03-19	6
17	HFD	33.1	35.1	16.9	86.56	2019-03-19	6
18	HFD	35.5	39.8	20.8	106.54	2019-03-19	6
19	HFD	33	26.4	20.5	105	2019-03-19	6
20	HFD	38	45	20.7	106.03	2019-03-19	6
21	HFD	39.9	53.5	18.4	94.24	2019-03-19	6
22	HFD	36	40.6	19	97.32	2019-03-19	6
23	HFD	31.2	28.9	18.9	96.81	2019-03-19	6
24	HFD	36.7	43.9	18.4	94.24	2019-03-19	6
25	HFD+LXN	33.2	21.2	17.1	87.59	2019-03-19	6
26	HFD+LXN	36.2	38.7	19.6	100.39	2019-03-19	6
27	HFD+LXN	37.1	43.8	18.7	95.78	2019-03-19	6
28	HFD+LXN	39.6	51.7	19.2	98.34	2019-03-19	6
29	HFD+LXN	34.7	33	19.4	99.37	2019-03-19	6
30	HFD+LXN	36.7	44.5	17.8	91.17	2019-03-19	6
31	HFD+LXN	37.5	37.9	19.1	97.83	2019-03-19	6
32	HFD+LXN	33.8	34.1	18.1	92.71	2019-03-19	6
33	HFD+LXN	40.7	40.3	20.2	103.46	2019-03-19	6
34	HFD+LXN	33.1	24.9	20.3	103.98	2019-03-19	6
35	HFD+LXN	34.5	35.8	21.4	109.61	2019-03-19	6
36	HFD+LXN	27.4	16.1	17.6	90.15	2019-03-19	6
37	HFD+HXN	32.3	16.2	16.4	84	2019-03-19	6
38	HFD+HXN	30.8	29.4	17.4	89.12	2019-03-19	6
39	HFD+HXN	36	45.2	16.7	85.54	2019-03-19	6
40	HFD+HXN	31.7	26.3	17.4	89.12	2019-03-19	6
41	HFD+HXN	35.8	42.6	18.1	92.71	2019-03-19	6
42	HFD+HXN	38.2	42.5	17.2	88.1	2019-03-19	6
43	HFD+HXN	30.2	20.3	15.7	80.42	2019-03-19	6
44	HFD+HXN	31.9	29.1	17.2	88.1	2019-03-19	6
45	HFD+HXN	32.9	29.5	18.7	95.78	2019-03-19	6
46	HFD+HXN	30.1	27	14.7	75.29	2019-03-19	6
47	HFD+HXN	38.2	39.9	18.5	94.76	2019-03-19	6
48	HFD+HXN	33.2	40.1	17.6	90.15	2019-03-19	6
49	HFD+TXN	31.4	20.8	18.4	94.24	2019-03-19	6
51	HFD+TXN	32.5	30	17.8	91.17	2019-03-19	6
52	HFD+TXN	29	18.4	15.2	77.85	2019-03-19	6
53	HFD+TXN	34.2	29.1	17.6	90.15	2019-03-19	6
54	HFD+TXN	24.8	13.2	14.8	75.81	2019-03-19	6
55	HFD+TXN	29.6	23.8	15.4	78.88	2019-03-19	6
56	HFD+TXN	29.7	8	16.7	85.54	2019-03-19	6
57	HFD+TXN	34.8	29.9	19.9	101.93	2019-03-19	6
58	HFD+TXN	30.1	19.9	19	97.32	2019-03-19	6
59	HFD+TXN	28.5	9.2	14.4	73.76	2019-03-19	6
60	HFD+TXN	29.8	14.2	22.5	115.24	2019-03-19	6
1	LFD	33.4	23.7	25	88.65	2019-03-26	7
2	LFD	27.7	-1.1	15.9	56.38	2019-03-26	7
3	LFD	29.6	28.1	20.5	72.69	2019-03-26	7
4	LFD	30.6	18.1	28	99.29	2019-03-26	7
5	LFD	27.4	6.6	21.1	74.82	2019-03-26	7
6	LFD	31.3	19	22.5	79.78	2019-03-26	7
7	LFD	30	17.2	21.8	77.3	2019-03-26	7
8	LFD	32.9	26.5	27.5	97.51	2019-03-26	7
9	LFD	31.9	21.8	23.7	84.04	2019-03-26	7
10	LFD	26.7	12.7	17.1	60.64	2019-03-26	7
11	LFD	30.6	19.1	21.9	77.66	2019-03-26	7
12	LFD	32.5	25.5	22.7	80.49	2019-03-26	7
13	HFD	34.5	42	19.7	100.9	2019-03-26	7
14	HFD	40.3	69.3	21.5	110.12	2019-03-26	7
15	HFD	41.6	63.8	19.9	101.93	2019-03-26	7
16	HFD	38.8	41.1	17.8	91.17	2019-03-26	7
17	HFD	32	30.6	15.8	80.93	2019-03-26	7
18	HFD	38.1	50	21.4	109.61	2019-03-26	7
19	HFD	34.8	33.3	19.4	99.37	2019-03-26	7
20	HFD	40.2	53.4	20.9	107.05	2019-03-26	7
21	HFD	41.5	59.6	17.5	89.63	2019-03-26	7
22	HFD	38.6	50.8	19.4	99.37	2019-03-26	7
23	HFD	33.5	38.4	18.5	94.76	2019-03-26	7
24	HFD	38.2	49.8	17.4	89.12	2019-03-26	7
25	HFD+LXN	35.2	28.5	18.5	94.76	2019-03-26	7
26	HFD+LXN	38.8	48.7	21.2	108.59	2019-03-26	7
27	HFD+LXN	39.7	53.9	20.2	103.46	2019-03-26	7
28	HFD+LXN	40.5	55.2	18.4	94.24	2019-03-26	7
29	HFD+LXN	36.4	39.5	20.1	102.95	2019-03-26	7
30	HFD+LXN	38.7	52.4	18.9	96.81	2019-03-26	7
31	HFD+LXN	40.8	50	22.5	115.24	2019-03-26	7
32	HFD+LXN	35.5	40.9	16.5	84.51	2019-03-26	7
33	HFD+LXN	42.7	47.2	19.7	100.9	2019-03-26	7
34	HFD+LXN	35.5	34	19.5	99.88	2019-03-26	7
35	HFD+LXN	34.9	37.4	20.9	107.05	2019-03-26	7
36	HFD+LXN	28.3	19.9	15.1	77.34	2019-03-26	7
37	HFD+HXN	34.3	23.4	17.9	91.68	2019-03-26	7
38	HFD+HXN	32	34.5	17.7	90.66	2019-03-26	7
39	HFD+HXN	35.5	43.1	13.8	70.68	2019-03-26	7
40	HFD+HXN	32.4	29.1	16.8	86.05	2019-03-26	7
41	HFD+HXN	37.3	48.6	16.8	86.05	2019-03-26	7
42	HFD+HXN	39.7	48.1	15.3	78.37	2019-03-26	7
43	HFD+HXN	32.3	28.7	17.3	88.61	2019-03-26	7
44	HFD+HXN	33.2	34.4	15.9	81.44	2019-03-26	7
45	HFD+HXN	35.1	38.2	15.4	78.88	2019-03-26	7
46	HFD+HXN	31	30.8	18.1	92.71	2019-03-26	7
47	HFD+HXN	40.8	49.5	15.1	77.34	2019-03-26	7
48	HFD+HXN	34.7	46.4	13.9	71.2	2019-03-26	7
49	HFD+TXN	31	19.2	16.6	85.03	2019-03-26	7
51	HFD+TXN	33.5	34	16	81.95	2019-03-26	7
52	HFD+TXN	29.9	22	14.7	75.29	2019-03-26	7
53	HFD+TXN	35.5	34	17.2	88.1	2019-03-26	7
54	HFD+TXN	25.6	16.9	14.1	72.22	2019-03-26	7
55	HFD+TXN	30.9	29.3	15.6	79.9	2019-03-26	7
56	HFD+TXN	30.6	11.3	14.4	73.76	2019-03-26	7
57	HFD+TXN	37.9	41.4	20.4	104.49	2019-03-26	7
58	HFD+TXN	32.2	28.3	16.9	86.56	2019-03-26	7
59	HFD+TXN	28.5	9.2	12.5	64.02	2019-03-26	7
60	HFD+TXN	31.3	19.9	22.4	114.73	2019-03-26	7
1	LFD	34.1	26.3	24.3	86.17	2019-04-02	8
2	LFD	28.3	1.1	19.1	67.73	2019-04-02	8
3	LFD	30.4	31.6	21.2	75.17	2019-04-02	8
4	LFD	31.8	22.8	29.2	103.54	2019-04-02	8
5	LFD	28.4	10.5	23.6	83.68	2019-04-02	8
6	LFD	32.6	24	25.1	89	2019-04-02	8
7	LFD	30.7	19.9	21	74.47	2019-04-02	8
8	LFD	33.6	29.2	28.1	99.64	2019-04-02	8
9	LFD	34.2	30.5	25.8	91.49	2019-04-02	8
10	LFD	27.6	16.5	21.6	76.59	2019-04-02	8
11	LFD	31.5	22.6	20.9	74.11	2019-04-02	8
12	LFD	33.3	28.6	22.2	78.72	2019-04-02	8
13	HFD	37.4	53.9	20.8	106.54	2019-04-02	8
14	HFD	43.3	81.9	23.9	122.42	2019-04-02	8
15	HFD	45	77.2	19.9	101.93	2019-04-02	8
16	HFD	41.5	50.9	19.5	99.88	2019-04-02	8
17	HFD	34.5	40.8	19.8	101.42	2019-04-02	8
18	HFD	40.5	59.4	21	107.56	2019-04-02	8
19	HFD	37.1	42.1	21	107.56	2019-04-02	8
20	HFD	42.6	62.6	22.5	115.24	2019-04-02	8
21	HFD	44	69.2	18.8	96.29	2019-04-02	8
22	HFD	41.8	63.3	20.6	105.51	2019-04-02	8
23	HFD	35.2	45.5	19.7	100.9	2019-04-02	8
24	HFD	41.5	62.7	21.5	110.12	2019-04-02	8
25	HFD+LXN	37.9	38.3	20.4	104.49	2019-04-02	8
26	HFD+LXN	41.6	59.4	20.8	106.54	2019-04-02	8
27	HFD+LXN	43.1	67.1	22.1	113.2	2019-04-02	8
28	HFD+LXN	43.4	66.3	19.3	98.85	2019-04-02	8
29	HFD+LXN	39.5	51.3	20.8	106.54	2019-04-02	8
30	HFD+LXN	41.8	64.6	20.2	103.46	2019-04-02	8
31	HFD+LXN	43.5	59.9	21.4	109.61	2019-04-02	8
32	HFD+LXN	37.9	50.4	19.2	98.34	2019-04-02	8
33	HFD+LXN	44.4	53.1	19.8	101.42	2019-04-02	8
34	HFD+LXN	38	43.4	19.5	99.88	2019-04-02	8
35	HFD+LXN	36.2	42.5	24	122.93	2019-04-02	8
36	HFD+LXN	30.2	28	16.8	86.05	2019-04-02	8
37	HFD+HXN	36.7	32	19	97.32	2019-04-02	8
38	HFD+HXN	34.5	45	18.9	96.81	2019-04-02	8
39	HFD+HXN	37.9	52.8	17.6	90.15	2019-04-02	8
40	HFD+HXN	34.2	36.3	18.2	93.22	2019-04-02	8
41	HFD+HXN	39.4	57	21.3	109.1	2019-04-02	8
42	HFD+HXN	43.8	63.4	18	92.2	2019-04-02	8
43	HFD+HXN	34.2	36.3	16.6	85.03	2019-04-02	8
44	HFD+HXN	34.9	41.3	19.1	97.83	2019-04-02	8
45	HFD+HXN	37.1	46.1	16.2	82.98	2019-04-02	8
46	HFD+HXN	33.5	41.4	20.4	104.49	2019-04-02	8
47	HFD+HXN	44.4	62.6	19	97.32	2019-04-02	8
48	HFD+HXN	36.6	54.4	12.5	64.02	2019-04-02	8
49	HFD+TXN	32.1	23.5	18.5	94.76	2019-04-02	8
51	HFD+TXN	34.8	39.2	16.7	85.54	2019-04-02	8
52	HFD+TXN	32.6	33.1	17	87.07	2019-04-02	8
53	HFD+TXN	37.9	43	18.1	92.71	2019-04-02	8
54	HFD+TXN	28.3	29.2	16.9	86.56	2019-04-02	8
55	HFD+TXN	32.8	37.2	16.6	85.03	2019-04-02	8
56	HFD+TXN	32.3	17.5	16.1	82.46	2019-04-02	8
57	HFD+TXN	40	49.3	20.9	107.05	2019-04-02	8
58	HFD+TXN	34.9	39	17.7	90.66	2019-04-02	8
59	HFD+TXN	30	14.9	17.1	87.59	2019-04-02	8
60	HFD+TXN	33.2	27.2	22.9	117.29	2019-04-02	8
1	LFD	35	29.63	23	81.56	2019-04-09	9
2	LFD	29.3	4.64	18	63.83	2019-04-09	9
3	LFD	31.4	35.93	21.6	76.59	2019-04-09	9
4	LFD	35.5	37.07	34	120.56	2019-04-09	9
5	LFD	28.5	10.89	22.5	79.78	2019-04-09	9
6	LFD	34	29.28	24.9	88.29	2019-04-09	9
7	LFD	31.2	21.88	20.2	71.63	2019-04-09	9
8	LFD	35.7	37.31	29.6	104.96	2019-04-09	9
9	LFD	33.8	29.01	23.7	84.04	2019-04-09	9
10	LFD	28.2	18.99	21.8	77.3	2019-04-09	9
11	LFD	31.2	21.4	21	74.47	2019-04-09	9
12	LFD	35	35.14	22.5	79.78	2019-04-09	9
13	HFD	36.9	51.85	12.8	65.56	2019-04-09	9
14	HFD	45.3	90.34	18.2	93.22	2019-04-09	9
15	HFD	45.6	79.53	18.7	95.78	2019-04-09	9
16	HFD	43.5	58.18	20.3	103.98	2019-04-09	9
17	HFD	36.1	47.35	18.7	95.78	2019-04-09	9
18	HFD	42	65.35	20.8	106.54	2019-04-09	9
19	HFD	37.9	45.21	20.1	102.95	2019-04-09	9
20	HFD	44.1	68.32	20.5	105	2019-04-09	9
21	HFD	44.2	70	16.5	84.51	2019-04-09	9
22	HFD	42.3	65.23	18.2	93.22	2019-04-09	9
23	HFD	37.2	53.72	19.1	97.83	2019-04-09	9
24	HFD	42.4	66.27	20.2	103.46	2019-04-09	9
25	HFD+LXN	40.4	47.45	15.6	79.9	2019-04-09	9
26	HFD+LXN	43.1	65.13	15.4	78.88	2019-04-09	9
27	HFD+LXN	45	74.42	20.3	103.98	2019-04-09	9
28	HFD+LXN	44	68.58	18.2	93.22	2019-04-09	9
29	HFD+LXN	41	57.09	19.4	99.37	2019-04-09	9
30	HFD+LXN	42.8	68.5	18.5	94.76	2019-04-09	9
31	HFD+LXN	44.3	62.87	19.7	100.9	2019-04-09	9
32	HFD+LXN	39.1	55.16	16.8	86.05	2019-04-09	9
33	HFD+LXN	45.5	56.9	19.8	101.42	2019-04-09	9
34	HFD+LXN	39.4	48.68	19.5	99.88	2019-04-09	9
35	HFD+LXN	37.5	47.64	22	112.68	2019-04-09	9
36	HFD+LXN	31.3	32.63	14.4	73.76	2019-04-09	9
37	HFD+HXN	37.5	34.89	13.5	69.15	2019-04-09	9
38	HFD+HXN	34.1	43.28	12.9	66.07	2019-04-09	9
39	HFD+HXN	39.6	59.68	17.7	90.66	2019-04-09	9
40	HFD+HXN	36.4	45.02	18.3	93.73	2019-04-09	9
41	HFD+HXN	40	59.36	17.6	90.15	2019-04-09	9
42	HFD+HXN	45.4	69.4	12.5	64.02	2019-04-09	9
43	HFD+HXN	34.1	35.86	17.9	91.68	2019-04-09	9
44	HFD+HXN	35.4	43.32	19.9	101.93	2019-04-09	9
45	HFD+HXN	38	49.61	13	66.59	2019-04-09	9
46	HFD+HXN	34	43.46	17.4	89.12	2019-04-09	9
47	HFD+HXN	46.2	69.23	17.8	91.17	2019-04-09	9
48	HFD+HXN	37.9	59.92	14.2	72.73	2019-04-09	9
49	HFD+TXN	33	26.92	15.9	81.44	2019-04-09	9
51	HFD+TXN	36.2	44.8	16.9	86.56	2019-04-09	9
52	HFD+TXN	33.6	37.14	16.3	83.49	2019-04-09	9
53	HFD+TXN	37.6	41.89	14.3	73.24	2019-04-09	9
54	HFD+TXN	29.2	33.33	15.8	80.93	2019-04-09	9
55	HFD+TXN	33.3	39.33	14.8	75.81	2019-04-09	9
56	HFD+TXN	33	20	15.4	78.88	2019-04-09	9
57	HFD+TXN	40.8	52.24	18.3	93.73	2019-04-09	9
58	HFD+TXN	36	43.43	16.3	83.49	2019-04-09	9
59	HFD+TXN	29.7	13.79	14.5	74.27	2019-04-09	9
60	HFD+TXN	33.2	27.2	16.3	83.49	2019-04-09	9
1	LFD	35.1	30	17.9	63.47	2019-04-16	10
2	LFD	28.9	3.21	15.8	56.03	2019-04-16	10
3	LFD	32.2	39.39	22	78.01	2019-04-16	10
4	LFD	35.7	37.84	30.8	109.22	2019-04-16	10
5	LFD	29.1	13.23	22.7	80.49	2019-04-16	10
6	LFD	34.3	30.42	24.5	86.88	2019-04-16	10
7	LFD	31.6	23.44	20.9	74.11	2019-04-16	10
8	LFD	35.3	35.77	27.3	96.8	2019-04-16	10
9	LFD	34.3	30.92	24.9	88.29	2019-04-16	10
10	LFD	29.1	22.78	23.6	83.68	2019-04-16	10
11	LFD	31.8	23.74	22	78.01	2019-04-16	10
12	LFD	35	35.14	23.1	81.91	2019-04-16	10
13	HFD	37.4	53.91	14.5	74.27	2019-04-16	10
14	HFD	47.2	98.32	17	87.07	2019-04-16	10
15	HFD	47.2	85.83	19	97.32	2019-04-16	10
16	HFD	44.6	62.18	18.4	94.24	2019-04-16	10
17	HFD	36.4	48.57	18.9	96.81	2019-04-16	10
18	HFD	44.8	76.38	22.3	114.22	2019-04-16	10
19	HFD	39.7	52.11	24.3	124.46	2019-04-16	10
20	HFD	45	71.76	20.9	107.05	2019-04-16	10
21	HFD	47	80.77	20.8	106.54	2019-04-16	10
22	HFD	45.3	76.95	22	112.68	2019-04-16	10
23	HFD	38.8	60.33	19.8	101.42	2019-04-16	10
24	HFD	44.6	74.9	19.9	101.93	2019-04-16	10
25	HFD+LXN	41	49.64	14.2	72.73	2019-04-16	10
26	HFD+LXN	44.4	70.11	16.6	85.03	2019-04-16	10
27	HFD+LXN	44.8	73.64	18.1	92.71	2019-04-16	10
28	HFD+LXN	46.6	78.54	19.9	101.93	2019-04-16	10
29	HFD+LXN	42.7	63.6	19.6	100.39	2019-04-16	10
30	HFD+LXN	45.1	77.56	20.8	106.54	2019-04-16	10
31	HFD+LXN	45.6	67.65	20.6	105.51	2019-04-16	10
32	HFD+LXN	40.4	60.32	17.9	91.68	2019-04-16	10
33	HFD+LXN	47.3	63.1	20.9	107.05	2019-04-16	10
34	HFD+LXN	40.9	54.34	19.6	100.39	2019-04-16	10
35	HFD+LXN	40.8	60.63	25.9	132.66	2019-04-16	10
36	HFD+LXN	31.5	33.47	12.1	61.98	2019-04-16	10
37	HFD+HXN	37.8	35.97	13.7	70.17	2019-04-16	10
38	HFD+HXN	35.7	50	16.5	84.51	2019-04-16	10
39	HFD+HXN	41.5	67.34	18.5	94.76	2019-04-16	10
40	HFD+HXN	37	47.41	16.2	82.98	2019-04-16	10
41	HFD+HXN	41.5	65.34	21.1	108.07	2019-04-16	10
42	HFD+HXN	47.6	77.61	16.6	85.03	2019-04-16	10
43	HFD+HXN	34.7	38.25	19.3	98.85	2019-04-16	10
44	HFD+HXN	36.2	46.56	18.2	93.22	2019-04-16	10
45	HFD+HXN	38.4	51.18	11	56.34	2019-04-16	10
46	HFD+HXN	34.7	46.41	23.8	121.9	2019-04-16	10
47	HFD+HXN	48.4	77.29	19.1	97.83	2019-04-16	10
48	HFD+HXN	39.9	68.35	13.9	71.2	2019-04-16	10
49	HFD+TXN	34	30.77	17.3	88.61	2019-04-16	10
51	HFD+TXN	36.4	45.6	15.5	79.39	2019-04-16	10
52	HFD+TXN	33.1	35.1	15.1	77.34	2019-04-16	10
53	HFD+TXN	39	47.17	18.6	95.27	2019-04-16	10
54	HFD+TXN	29.6	35.16	16.4	84	2019-04-16	10
55	HFD+TXN	34.2	43.1	16.7	85.54	2019-04-16	10
56	HFD+TXN	34	23.64	16.4	84	2019-04-16	10
57	HFD+TXN	42.2	57.46	22.9	117.29	2019-04-16	10
58	HFD+TXN	36.5	45.42	18.5	94.76	2019-04-16	10
59	HFD+TXN	30.7	17.62	22.1	113.2	2019-04-16	10
60	HFD+TXN	34.9	33.72	20.6	105.51	2019-04-16	10
1	LFD	36.1	33.7	23.7	84	2019-04-23	11
2	LFD	29.7	6.07	20.7	73.4	2019-04-23	11
3	LFD	33.4	44.59	22	78	2019-04-23	11
4	LFD	37.8	45.95	33.2	117.7	2019-04-23	11
5	LFD	30	16.73	24.7	87.6	2019-04-23	11
6	LFD	35.6	35.36	25.5	90.4	2019-04-23	11
7	LFD	31.7	23.83	21.6	76.6	2019-04-23	11
8	LFD	38.5	48.08	32.6	115.6	2019-04-23	11
9	LFD	36.4	38.93	28.8	102.1	2019-04-23	11
10	LFD	30.3	27.85	21.4	75.9	2019-04-23	11
11	LFD	32.4	26.07	23.1	81.9	2019-04-23	11
12	LFD	36.6	41.31	25.4	90.1	2019-04-23	11
13	HFD	39.9	64.2	20.8	106.5	2019-04-23	11
14	HFD	49.9	109.66	22.6	115.8	2019-04-23	11
15	HFD	47.6	87.4	17.6	90.1	2019-04-23	11
16	HFD	46.5	69.09	20.3	104	2019-04-23	11
17	HFD	38	55.1	18.4	94.2	2019-04-23	11
18	HFD	47	85.04	20.7	106	2019-04-23	11
19	HFD	42.9	64.37	23.7	121.4	2019-04-23	11
20	HFD	47.5	81.3	20.7	106	2019-04-23	11
21	HFD	48.1	85	17.9	91.7	2019-04-23	11
22	HFD	47.6	85.94	19.5	99.9	2019-04-23	11
23	HFD	40.9	69.01	19.5	99.9	2019-04-23	11
24	HFD	46.6	82.75	20	102.4	2019-04-23	11
25	HFD+LXN	43	56.93	20.3	104	2019-04-23	11
26	HFD+LXN	46.4	77.78	21.1	108.1	2019-04-23	11
27	HFD+LXN	46.8	81.4	21	107.6	2019-04-23	11
28	HFD+LXN	47.6	82.38	21.4	109.6	2019-04-23	11
29	HFD+LXN	45	72.41	20	102.4	2019-04-23	11
30	HFD+LXN	47.9	88.58	20.7	106	2019-04-23	11
31	HFD+LXN	48	76.47	23.3	119.3	2019-04-23	11
32	HFD+LXN	42.9	70.24	18.7	95.8	2019-04-23	11
33	HFD+LXN	48.6	67.59	20.3	104	2019-04-23	11
34	HFD+LXN	42.2	59.25	18.3	93.7	2019-04-23	11
35	HFD+LXN	43.8	72.44	23.6	120.9	2019-04-23	11
36	HFD+LXN	33.1	40.25	17.6	90.1	2019-04-23	11
37	HFD+HXN	40.1	44.24	19.5	99.9	2019-04-23	11
38	HFD+HXN	38.1	60.08	22.3	114.2	2019-04-23	11
39	HFD+HXN	43.5	75.4	20.1	103	2019-04-23	11
40	HFD+HXN	37	47.41	16.1	82.5	2019-04-23	11
41	HFD+HXN	43.8	74.5	17.9	91.7	2019-04-23	11
42	HFD+HXN	49.6	85.07	18.7	95.8	2019-04-23	11
43	HFD+HXN	35.9	43.03	16.9	86.6	2019-04-23	11
44	HFD+HXN	37.6	52.23	17.9	91.7	2019-04-23	11
45	HFD+HXN	40.4	59.06	18.7	95.8	2019-04-23	11
46	HFD+HXN	35.8	51.05	16.6	85	2019-04-23	11
47	HFD+HXN	49.5	81.32	19.5	99.9	2019-04-23	11
48	HFD+HXN	41.5	75.11	20.6	105.5	2019-04-23	11
49	HFD+TXN	36	38.46	19.3	98.9	2019-04-23	11
51	HFD+TXN	38.5	54	18.2	93.2	2019-04-23	11
52	HFD+TXN	35.1	43.27	17.1	87.6	2019-04-23	11
53	HFD+TXN	41	54.72	16.9	86.6	2019-04-23	11
54	HFD+TXN	31.2	42.47	16	82	2019-04-23	11
55	HFD+TXN	35.5	48.54	16.8	86	2019-04-23	11
56	HFD+TXN	35.7	29.82	18.3	93.7	2019-04-23	11
57	HFD+TXN	45.6	70.15	25.1	128.6	2019-04-23	11
58	HFD+TXN	38.5	53.39	21.7	111.1	2019-04-23	11
59	HFD+TXN	32.2	23.37	20.9	107	2019-04-23	11
60	HFD+TXN	36	37.93	20.8	106.5	2019-04-23	11
1	LFD	36.6	35.56	29.3	103.9	2019-04-30	12
2	LFD	30.4	8.57	22.7	80.49	2019-04-30	12
3	LFD	33.1	43.29	19.7	69.86	2019-04-30	12
4	LFD	39.2	51.35	32.7	115.95	2019-04-30	12
5	LFD	30.2	17.51	23.6	83.68	2019-04-30	12
6	LFD	36.3	38.02	24.8	87.94	2019-04-30	12
7	LFD	32.1	25.39	22.2	78.72	2019-04-30	12
8	LFD	39.2	50.77	30	106.38	2019-04-30	12
9	LFD	37.8	44.27	31.2	110.63	2019-04-30	12
10	LFD	30.8	29.96	28.4	100.71	2019-04-30	12
11	LFD	33.4	29.96	24.2	85.81	2019-04-30	12
12	LFD	36.5	40.93	22.5	79.78	2019-04-30	12
13	HFD	41.7	71.6	21	107.56	2019-04-30	12
14	HFD	50.5	112.18	23.6	120.88	2019-04-30	12
15	HFD	48.9	92.52	18.2	93.22	2019-04-30	12
16	HFD	49.1	78.55	21.4	109.61	2019-04-30	12
17	HFD	39.7	62.04	20.3	103.98	2019-04-30	12
18	HFD	48.4	90.55	19.8	101.42	2019-04-30	12
19	HFD	44.1	68.97	21.5	110.12	2019-04-30	12
20	HFD	48.6	85.5	20.2	103.46	2019-04-30	12
21	HFD	49.7	91.15	18.5	94.76	2019-04-30	12
22	HFD	48.9	91.02	19	97.32	2019-04-30	12
23	HFD	42.5	75.62	19.5	99.88	2019-04-30	12
24	HFD	48.3	89.41	20.9	107.05	2019-04-30	12
25	HFD+LXN	45.3	65.33	21.1	108.07	2019-04-30	12
26	HFD+LXN	49.2	88.51	21.3	109.1	2019-04-30	12
27	HFD+LXN	49	89.92	21.8	111.66	2019-04-30	12
28	HFD+LXN	48.7	86.59	19.7	100.9	2019-04-30	12
29	HFD+LXN	46.6	78.54	21	107.56	2019-04-30	12
30	HFD+LXN	49.5	94.88	19.9	101.93	2019-04-30	12
31	HFD+LXN	49	80.15	21.5	110.12	2019-04-30	12
32	HFD+LXN	44.5	76.59	19.2	98.34	2019-04-30	12
33	HFD+LXN	50.3	73.45	19.9	101.93	2019-04-30	12
34	HFD+LXN	44.2	66.79	19.3	98.85	2019-04-30	12
35	HFD+LXN	44.8	76.38	22.7	116.27	2019-04-30	12
36	HFD+LXN	35	48.31	18.6	95.27	2019-04-30	12
37	HFD+HXN	41.4	48.92	19.3	98.85	2019-04-30	12
38	HFD+HXN	39.7	66.81	21.5	110.12	2019-04-30	12
39	HFD+HXN	46.1	85.89	19.8	101.42	2019-04-30	12
40	HFD+HXN	39.8	58.57	18.6	95.27	2019-04-30	12
41	HFD+HXN	45.2	80.08	22.5	115.24	2019-04-30	12
42	HFD+HXN	51	90.3	22.8	116.78	2019-04-30	12
43	HFD+HXN	37.6	49.8	17.4	89.12	2019-04-30	12
44	HFD+HXN	39.2	58.7	12.5	64.02	2019-04-30	12
45	HFD+HXN	43	69.29	19.7	100.9	2019-04-30	12
46	HFD+HXN	36.8	55.27	16.6	85.03	2019-04-30	12
47	HFD+HXN	50.3	84.25	19.1	97.83	2019-04-30	12
48	HFD+HXN	43.9	85.23	17.4	89.12	2019-04-30	12
49	HFD+TXN	36.9	41.92	19.7	100.9	2019-04-30	12
51	HFD+TXN	40.3	61.2	16.5	84.51	2019-04-30	12
52	HFD+TXN	37.3	52.24	17	87.07	2019-04-30	12
53	HFD+TXN	42.8	61.51	19.8	101.42	2019-04-30	12
54	HFD+TXN	32.3	47.49	16.6	85.03	2019-04-30	12
55	HFD+TXN	36.4	52.3	16	81.95	2019-04-30	12
56	HFD+TXN	36	30.91	15.5	79.39	2019-04-30	12
57	HFD+TXN	47.7	77.99	23.8	121.9	2019-04-30	12
58	HFD+TXN	40.4	60.96	20.2	103.46	2019-04-30	12
59	HFD+TXN	33.6	28.74	18.1	92.71	2019-04-30	12
60	HFD+TXN	36.8	41	19.4	99.37	2019-04-30	12
1	LFD	36.8	36.3	24	85.1	2019-05-07	13
2	LFD	30.5	8.93	20.4	72.3	2019-05-07	13
3	LFD	34	47.19	21.2	75.2	2019-05-07	13
4	LFD	39.4	52.12	31	109.9	2019-05-07	13
5	LFD	30.8	19.84	22.9	81.2	2019-05-07	13
6	LFD	37.3	41.83	24.4	86.5	2019-05-07	13
7	LFD	32	25	20.9	74.1	2019-05-07	13
8	LFD	38.8	49.23	28.3	100.4	2019-05-07	13
9	LFD	39.1	49.24	27.5	97.5	2019-05-07	13
10	LFD	31.1	31.22	21.9	77.7	2019-05-07	13
11	LFD	34.1	32.68	21.8	77.3	2019-05-07	13
12	LFD	36.6	41.31	22.8	80.8	2019-05-07	13
13	HFD	44	81.07	20.7	106	2019-05-07	13
14	HFD	51.8	117.65	22.7	116.3	2019-05-07	13
15	HFD	50.2	97.64	18.1	92.7	2019-05-07	13
16	HFD	51	85.45	19.5	99.9	2019-05-07	13
17	HFD	41	67.35	19.3	98.9	2019-05-07	13
18	HFD	49.5	94.88	20.3	104	2019-05-07	13
19	HFD	45.6	74.71	22.7	116.3	2019-05-07	13
20	HFD	49.4	88.55	20.4	104.5	2019-05-07	13
21	HFD	51	96.15	31.7	162.4	2019-05-07	13
22	HFD	49.1	91.8	19	97.3	2019-05-07	13
23	HFD	43.9	81.4	19.5	99.9	2019-05-07	13
24	HFD	50	96.08	20	102.4	2019-05-07	13
25	HFD+LXN	47.7	74.09	18.8	96.3	2019-05-07	13
26	HFD+LXN	50.5	93.49	21.3	109.1	2019-05-07	13
27	HFD+LXN	50.4	95.35	22.2	113.7	2019-05-07	13
28	HFD+LXN	49.6	90.04	19.9	101.9	2019-05-07	13
29	HFD+LXN	48.5	85.82	20.4	104.5	2019-05-07	13
30	HFD+LXN	51.6	103.15	20.6	105.5	2019-05-07	13
31	HFD+LXN	49	80.15	22.4	114.7	2019-05-07	13
32	HFD+LXN	45.2	79.37	17.6	90.1	2019-05-07	13
33	HFD+LXN	50.3	73.45	21.2	108.6	2019-05-07	13
34	HFD+LXN	45.7	72.45	19.2	98.3	2019-05-07	13
35	HFD+LXN	45.2	77.95	20.8	106.5	2019-05-07	13
36	HFD+LXN	36.6	55.08	17.6	90.1	2019-05-07	13
37	HFD+HXN	43.1	55.04	19.4	99.4	2019-05-07	13
38	HFD+HXN	42	76.47	22.1	113.2	2019-05-07	13
39	HFD+HXN	48.2	94.35	19.1	97.8	2019-05-07	13
40	HFD+HXN	41.5	65.34	18	92.2	2019-05-07	13
41	HFD+HXN	46.9	86.85	21	107.6	2019-05-07	13
42	HFD+HXN	52.5	95.9	18.5	94.8	2019-05-07	13
43	HFD+HXN	38.3	52.59	22.1	113.2	2019-05-07	13
44	HFD+HXN	41.1	66.4	21.3	109.1	2019-05-07	13
45	HFD+HXN	43.5	71.26	17	87.1	2019-05-07	13
46	HFD+HXN	38.4	62.03	11.3	57.9	2019-05-07	13
47	HFD+HXN	51.5	88.64	21.2	108.6	2019-05-07	13
48	HFD+HXN	45.6	92.41	11.7	59.9	2019-05-07	13
49	HFD+TXN	37.6	44.62	21.1	108.1	2019-05-07	13
51	HFD+TXN	42.4	69.6	17.6	90.1	2019-05-07	13
52	HFD+TXN	38.3	56.33	16.7	85.5	2019-05-07	13
53	HFD+TXN	45.6	72.08	21.2	108.6	2019-05-07	13
54	HFD+TXN	33.7	53.88	17.6	90.1	2019-05-07	13
55	HFD+TXN	36.5	52.72	16.4	84	2019-05-07	13
56	HFD+TXN	36.3	32	17.2	88.1	2019-05-07	13
57	HFD+TXN	49	82.84	22.5	115.2	2019-05-07	13
58	HFD+TXN	39.8	58.57	14.1	72.2	2019-05-07	13
59	HFD+TXN	33.8	29.5	21	107.6	2019-05-07	13
60	HFD+TXN	37.5	43.68	20.8	106.5	2019-05-07	13
1	LFD	37.8	40	24.1	85.46	2019-05-14	14
2	LFD	32	14.29	22.6	80.14	2019-05-14	14
3	LFD	33.9	46.75	20.1	71.27	2019-05-14	14
4	LFD	41	58.3	32	113.47	2019-05-14	14
5	LFD	31.3	21.79	21.9	77.66	2019-05-14	14
6	LFD	38.4	46.01	26.2	92.9	2019-05-14	14
7	LFD	33.4	30.47	22.1	78.37	2019-05-14	14
8	LFD	40.7	56.54	30.7	108.86	2019-05-14	14
9	LFD	38.8	48.09	26	92.2	2019-05-14	14
10	LFD	32.2	35.86	24	85.1	2019-05-14	14
11	LFD	34.3	33.46	21.6	76.59	2019-05-14	14
12	LFD	37.4	44.4	24.9	88.29	2019-05-14	14
13	HFD	46.5	91.36	21	107.56	2019-05-14	14
14	HFD	51.6	116.81	21.7	111.15	2019-05-14	14
15	HFD	50.3	98.03	18.1	92.71	2019-05-14	14
16	HFD	52.2	89.82	20.1	102.95	2019-05-14	14
17	HFD	43	75.51	21.1	108.07	2019-05-14	14
18	HFD	50.3	98.03	20.6	105.51	2019-05-14	14
19	HFD	46.2	77.01	23.2	118.83	2019-05-14	14
20	HFD	49.7	89.69	20.4	104.49	2019-05-14	14
21	HFD	51.4	97.69	18.7	95.78	2019-05-14	14
22	HFD	49.3	92.58	18.3	93.73	2019-05-14	14
23	HFD	46.1	90.5	21.2	108.59	2019-05-14	14
24	HFD	50.4	97.65	21.8	111.66	2019-05-14	14
25	HFD+LXN	50.3	83.58	20.5	105	2019-05-14	14
26	HFD+LXN	51.7	98.08	18.6	95.27	2019-05-14	14
27	HFD+LXN	50.9	97.29	20.7	106.03	2019-05-14	14
28	HFD+LXN	50.1	91.95	21.6	110.64	2019-05-14	14
29	HFD+LXN	50.5	93.49	18.7	95.78	2019-05-14	14
30	HFD+LXN	52.3	105.91	18.8	96.29	2019-05-14	14
31	HFD+LXN	49.6	82.35	21.1	108.07	2019-05-14	14
32	HFD+LXN	46.6	84.92	17.2	88.1	2019-05-14	14
33	HFD+LXN	50.7	74.83	19.8	101.42	2019-05-14	14
34	HFD+LXN	48.5	83.02	20.6	105.51	2019-05-14	14
35	HFD+LXN	46.3	82.28	20.4	104.49	2019-05-14	14
36	HFD+LXN	37.7	59.75	17.8	91.17	2019-05-14	14
37	HFD+HXN	45.1	62.23	19.7	100.9	2019-05-14	14
38	HFD+HXN	43.5	82.77	22.6	115.76	2019-05-14	14
39	HFD+HXN	50.5	103.63	18.8	96.29	2019-05-14	14
40	HFD+HXN	44.2	76.1	18.9	96.81	2019-05-14	14
41	HFD+HXN	48.1	91.63	21.8	111.66	2019-05-14	14
42	HFD+HXN	53.5	99.63	16.8	86.05	2019-05-14	14
43	HFD+HXN	39.4	56.97	18.7	95.78	2019-05-14	14
44	HFD+HXN	41.7	68.83	16.3	83.49	2019-05-14	14
45	HFD+HXN	44.5	75.2	16.8	86.05	2019-05-14	14
46	HFD+HXN	38.4	62.03	26.1	133.68	2019-05-14	14
47	HFD+HXN	51.7	89.38	20.8	106.54	2019-05-14	14
48	HFD+HXN	46.7	97.05	12.5	64.02	2019-05-14	14
49	HFD+TXN	38.2	46.92	19.3	98.85	2019-05-14	14
51	HFD+TXN	43.1	72.4	17.4	89.12	2019-05-14	14
52	HFD+TXN	40	63.27	17.4	89.12	2019-05-14	14
53	HFD+TXN	47.4	78.87	19	97.32	2019-05-14	14
54	HFD+TXN	35.4	61.64	16.8	86.05	2019-05-14	14
55	HFD+TXN	37.9	58.58	17.4	89.12	2019-05-14	14
56	HFD+TXN	37.5	36.36	19.3	98.85	2019-05-14	14
57	HFD+TXN	49.7	85.45	22.4	114.73	2019-05-14	14
58	HFD+TXN	40.6	61.75	19.1	97.83	2019-05-14	14
59	HFD+TXN	33.6	28.74	29.8	152.64	2019-05-14	14
60	HFD+TXN	38.3	46.74	21.5	110.12	2019-05-14	14
1	LFD	38.6	42.96	23.2	82.27	2019-05-21	15
2	LFD	32.9	17.5	24	85.1	2019-05-21	15
3	LFD	36.1	56.28	24.4	86.52	2019-05-21	15
4	LFD	42.7	64.86	33.2	117.73	2019-05-21	15
5	LFD	31.9	24.12	25.2	89.36	2019-05-21	15
6	LFD	38.3	45.63	24.8	87.94	2019-05-21	15
7	LFD	33.8	32.03	23.2	82.27	2019-05-21	15
8	LFD	43	65.38	33.3	118.08	2019-05-21	15
9	LFD	39.7	51.53	28	99.29	2019-05-21	15
10	LFD	33.6	41.77	24.6	87.23	2019-05-21	15
11	LFD	35.9	39.69	25	88.65	2019-05-21	15
12	LFD	38.8	49.81	26.8	95.03	2019-05-21	15
13	HFD	47.6	95.88	20.5	105	2019-05-21	15
14	HFD	51.9	118.07	22.9	117.29	2019-05-21	15
15	HFD	50.6	99.21	18.4	94.24	2019-05-21	15
16	HFD	52.2	89.82	19.9	101.93	2019-05-21	15
17	HFD	44.6	82.04	21	107.56	2019-05-21	15
18	HFD	51.2	101.57	21.3	109.1	2019-05-21	15
19	HFD	47.2	80.84	26.1	133.68	2019-05-21	15
20	HFD	50.4	92.37	20.3	103.98	2019-05-21	15
21	HFD	51.5	98.08	19.4	99.37	2019-05-21	15
22	HFD	49.7	94.14	20.6	105.51	2019-05-21	15
23	HFD	47.3	95.45	20	102.44	2019-05-21	15
24	HFD	50	96.08	18.5	94.76	2019-05-21	15
25	HFD+LXN	51.6	88.32	21.3	109.1	2019-05-21	15
26	HFD+LXN	52.5	101.15	21.1	108.07	2019-05-21	15
27	HFD+LXN	50.6	96.12	21.6	110.64	2019-05-21	15
28	HFD+LXN	51.3	96.55	23.2	118.83	2019-05-21	15
29	HFD+LXN	51.3	96.55	20.5	105	2019-05-21	15
30	HFD+LXN	52.7	107.48	21	107.56	2019-05-21	15
31	HFD+LXN	51.8	90.44	24.5	125.49	2019-05-21	15
32	HFD+LXN	47.2	87.3	18.5	94.76	2019-05-21	15
33	HFD+LXN	51.6	77.93	21.6	110.64	2019-05-21	15
34	HFD+LXN	49	84.91	20.1	102.95	2019-05-21	15
35	HFD+LXN	47.2	85.83	21	107.56	2019-05-21	15
36	HFD+LXN	39	65.25	18.5	94.76	2019-05-21	15
37	HFD+HXN	46	65.47	19.7	100.9	2019-05-21	15
38	HFD+HXN	45.3	90.34	21.7	111.15	2019-05-21	15
39	HFD+HXN	51.2	106.45	19.2	98.34	2019-05-21	15
40	HFD+HXN	46.1	83.67	19.9	101.93	2019-05-21	15
41	HFD+HXN	50.1	99.6	22.3	114.22	2019-05-21	15
42	HFD+HXN	53.4	99.25	18.8	96.29	2019-05-21	15
43	HFD+HXN	40.9	62.95	16.9	86.56	2019-05-21	15
44	HFD+HXN	43	74.09	20.9	107.05	2019-05-21	15
45	HFD+HXN	46.6	83.46	14.1	72.22	2019-05-21	15
46	HFD+HXN	39.3	65.82	22.5	115.24	2019-05-21	15
47	HFD+HXN	51.9	90.11	20.1	102.95	2019-05-21	15
48	HFD+HXN	47.8	101.69	16.4	84	2019-05-21	15
49	HFD+TXN	40	53.85	21.1	108.07	2019-05-21	15
51	HFD+TXN	45	80	18.4	94.24	2019-05-21	15
52	HFD+TXN	41.3	68.57	18.4	94.24	2019-05-21	15
53	HFD+TXN	49.2	85.66	21.2	108.59	2019-05-21	15
54	HFD+TXN	36.5	66.67	17.9	91.68	2019-05-21	15
55	HFD+TXN	39	63.18	18.1	92.71	2019-05-21	15
56	HFD+TXN	38.5	40	19.5	99.88	2019-05-21	15
57	HFD+TXN	51.1	90.67	23.4	119.85	2019-05-21	15
58	HFD+TXN	42.1	67.73	21.3	109.1	2019-05-21	15
59	HFD+TXN	35	34.1	18.5	94.76	2019-05-21	15
60	HFD+TXN	39	49.43	19.8	101.42	2019-05-21	15
1	LFD	38.4	42.22	21.9	77.66	2019-05-28	16
2	LFD	33.1	18.21	22.1	78.37	2019-05-28	16
3	LFD	35.7	54.55	20.6	73.05	2019-05-28	16
4	LFD	43	66.02	33.6	119.14	2019-05-28	16
5	LFD	32.2	25.29	24.5	86.88	2019-05-28	16
6	LFD	39.5	50.19	29.9	106.02	2019-05-28	16
7	LFD	34.3	33.98	23.3	82.62	2019-05-28	16
8	LFD	43.3	66.54	34.9	123.75	2019-05-28	16
9	LFD	40.5	54.58	33.5	118.79	2019-05-28	16
10	LFD	34.2	44.3	30.1	106.73	2019-05-28	16
11	LFD	36.6	42.41	29.6	104.96	2019-05-28	16
12	LFD	39.2	51.35	34	120.56	2019-05-28	16
13	HFD	48.9	101.23	20	102.44	2019-05-28	16
14	HFD	52.2	119.33	21.8	111.66	2019-05-28	16
15	HFD	51.6	103.15	18.9	96.81	2019-05-28	16
16	HFD	52.9	92.36	23.6	120.88	2019-05-28	16
17	HFD	46.5	89.8	22.8	116.78	2019-05-28	16
18	HFD	51.8	103.94	24.1	123.44	2019-05-28	16
19	HFD	47.3	81.23	26.2	134.2	2019-05-28	16
20	HFD	50.7	93.51	25.5	130.61	2019-05-28	16
21	HFD	52.3	101.15	23.6	120.88	2019-05-28	16
22	HFD	50	95.31	26.6	136.25	2019-05-28	16
23	HFD	48.7	101.24	26.3	134.71	2019-05-28	16
24	HFD	50.2	96.86	26.8	137.27	2019-05-28	16
25	HFD+LXN	52.7	92.34	18.8	96.29	2019-05-28	16
26	HFD+LXN	52.4	100.77	23.8	121.9	2019-05-28	16
27	HFD+LXN	51.2	98.45	17.3	88.61	2019-05-28	16
28	HFD+LXN	51.2	96.17	24.8	127.03	2019-05-28	16
29	HFD+LXN	51.8	98.47	25.3	129.59	2019-05-28	16
30	HFD+LXN	53.3	109.84	26	133.17	2019-05-28	16
31	HFD+LXN	50.7	86.4	25.7	131.64	2019-05-28	16
32	HFD+LXN	47.2	87.3	25.1	128.56	2019-05-28	16
33	HFD+LXN	51.3	76.9	28.7	147	2019-05-28	16
34	HFD+LXN	50.2	89.43	26	133.17	2019-05-28	16
35	HFD+LXN	47.7	87.8	29.3	150.07	2019-05-28	16
36	HFD+LXN	39.4	66.95	29.8	152.64	2019-05-28	16
37	HFD+HXN	47.3	70.14	16.7	85.54	2019-05-28	16
38	HFD+HXN	46	93.28	19.4	99.37	2019-05-28	16
39	HFD+HXN	50.5	103.63	16.6	85.03	2019-05-28	16
40	HFD+HXN	47.3	88.45	19	97.32	2019-05-28	16
41	HFD+HXN	50.4	100.8	15.3	78.37	2019-05-28	16
42	HFD+HXN	53.4	99.25	29.7	152.12	2019-05-28	16
43	HFD+HXN	41.8	66.53	22.8	116.78	2019-05-28	16
44	HFD+HXN	44	78.14	22.4	114.73	2019-05-28	16
45	HFD+HXN	46.7	83.86	19.5	99.88	2019-05-28	16
46	HFD+HXN	40.8	72.15	34.5	176.71	2019-05-28	16
47	HFD+HXN	51.7	89.38	25.3	129.59	2019-05-28	16
48	HFD+HXN	48.8	105.91	13.7	70.17	2019-05-28	16
49	HFD+TXN	40.8	56.92	15.4	78.88	2019-05-28	16
51	HFD+TXN	45.9	83.6	15.9	81.44	2019-05-28	16
52	HFD+TXN	42.1	71.84	16.6	85.03	2019-05-28	16
53	HFD+TXN	50.4	90.19	16.1	82.46	2019-05-28	16
54	HFD+TXN	36.6	67.12	19.1	97.83	2019-05-28	16
55	HFD+TXN	39.6	65.69	19.2	98.34	2019-05-28	16
56	HFD+TXN	39.6	44	22	112.68	2019-05-28	16
57	HFD+TXN	51.9	93.66	27.5	140.85	2019-05-28	16
58	HFD+TXN	43.3	72.51	21.8	111.66	2019-05-28	16
59	HFD+TXN	34.7	32.95	29.5	151.1	2019-05-28	16
60	HFD+TXN	39.2	50.19	27.9	142.9	2019-05-28	16
