# Supplementary material for: Tetrahydroxanthohumol, a xanthohumol derivative, attenuates high-fat diet-induced hepatic steatosis by antagonizing PPARγ
Source: eLife journal article supplement (doi:10.7554/elife.66398), 2021-06-14

**A**

Weekly Weight Gain (%)

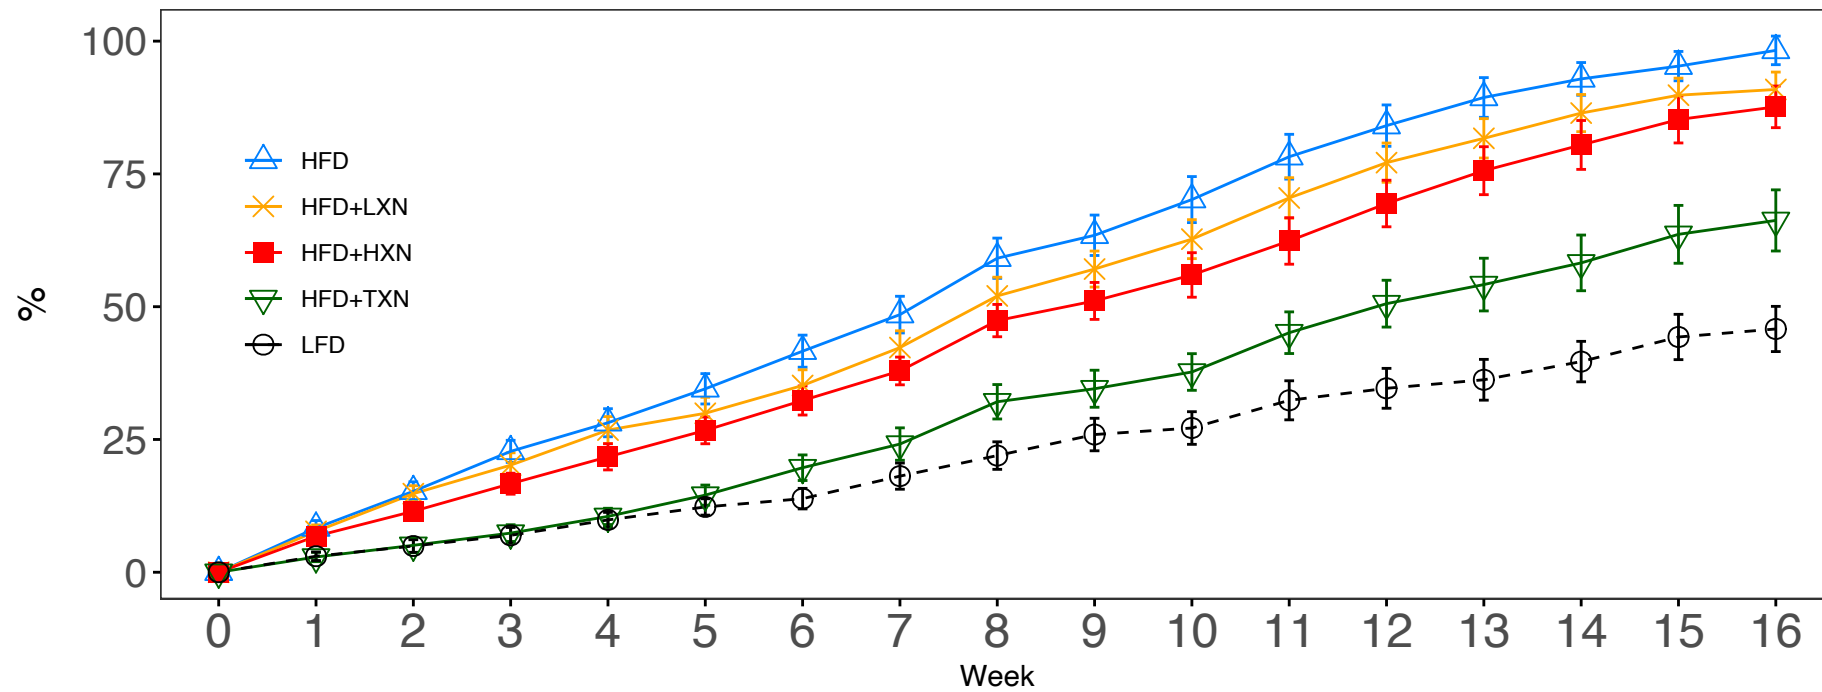**B**

Cumulative Weight Gained

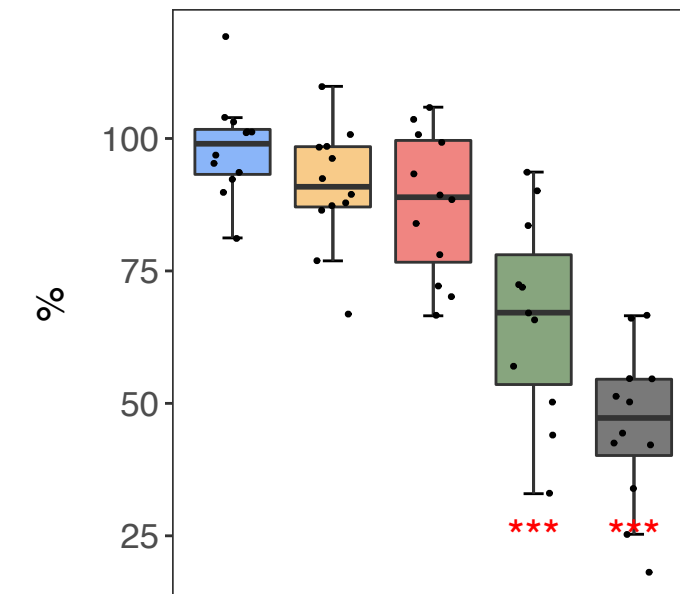**C**

Weekly Food Intake

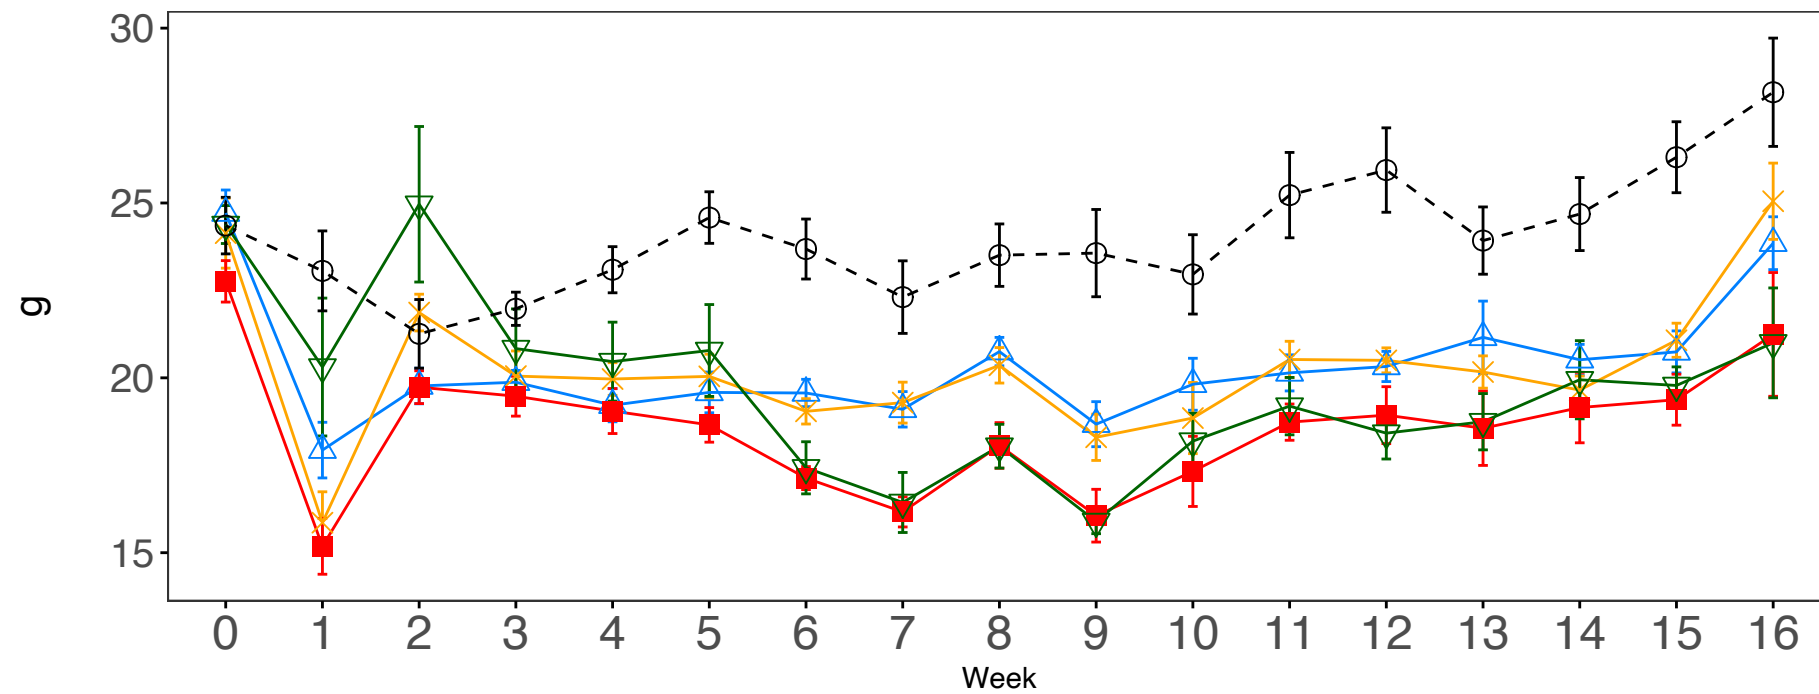**D**

Cumulative Calorie Intake

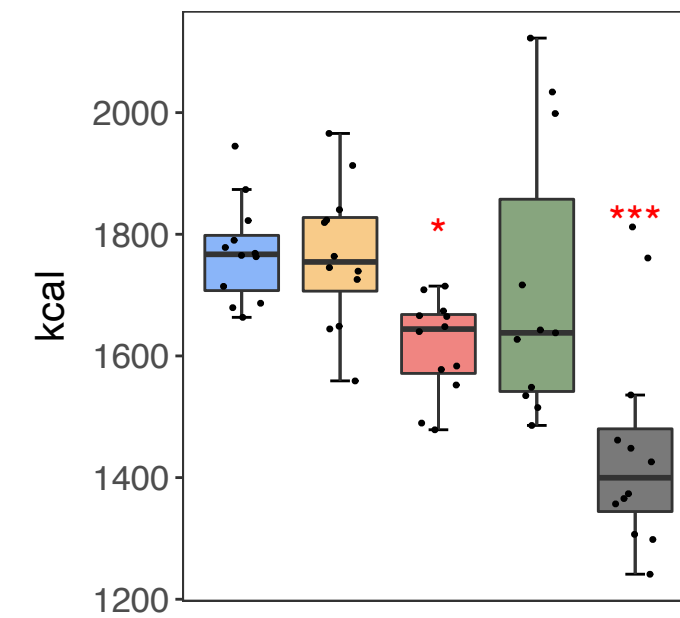

Supplement: fig2-data1 [file fig2.pdf › Figure2/fig2.pdf]
