# Supplementary material for: Tetrahydroxanthohumol, a xanthohumol derivative, attenuates high-fat diet-induced hepatic steatosis by antagonizing PPARγ
Source: eLife journal article supplement (doi:10.7554/elife.66398), 2021-06-14
Supplement: fig8-data1 [file DEGs_TXN_vs_HFD.xlsx]

## Sheet: TXNvs.HFD
	gene.id	entrez	symbol	gene.name	logFC	logCPM	F	PValue	FDR
ENSMUSG00000029656	ENSMUSG00000029656	110382	C8b	complement component 8, beta polypeptide	1.82029	6.93983	52.825	9.20856e-09	9.90933e-05
ENSMUSG00000072849	ENSMUSG00000072849	20704	Serpina1e	serine (or cysteine) peptidase inhibitor, clade A, member 1E	3.04645	10.3163	49.3395	2.95094e-08	0.000158776
ENSMUSG00000020122	ENSMUSG00000020122	13649	Egfr	epidermal growth factor receptor	1.71608	6.69659	43.4343	8.32882e-08	0.000270675
ENSMUSG00000064294	ENSMUSG00000064294	71724	Aox3	aldehyde oxidase 3	0.824874	7.64413	38.9849	1.41173e-07	0.000270675
ENSMUSG00000023031	ENSMUSG00000023031	109901	Cela1	chymotrypsin-like elastase family, member 1	1.60943	4.70139	40.0931	1.50509e-07	0.000270675
ENSMUSG00000058207	ENSMUSG00000058207	20714	Serpina3k	serine (or cysteine) peptidase inhibitor, clade A, member 3K	1.19448	11.9511	38.4382	1.63968e-07	0.000270675
ENSMUSG00000040584	ENSMUSG00000040584	18671	Abcb1a	ATP-binding cassette, sub-family B (MDR/TAP), member 1A	-1.44278	2.96658	38.1794	1.76073e-07	0.000270675
ENSMUSG00000079507	ENSMUSG00000079507	15006	H2-Q1	histocompatibility 2, Q region locus 1	-1.73577	4.76523	37.6156	3.14046e-07	0.000422431
ENSMUSG00000054263	ENSMUSG00000054263	16880	Lifr	LIF receptor alpha	1.24024	6.46264	36.4601	3.62347e-07	0.000433246
ENSMUSG00000017723	ENSMUSG00000017723	67701	Wfdc2	WAP four-disulfide core domain 2	-2.0561	5.25032	36.8394	4.85334e-07	0.000522268
ENSMUSG00000026249	ENSMUSG00000026249	20720	Serpine2	serine (or cysteine) peptidase inhibitor, clade E, member 2	1.47432	4.00974	34.4205	5.85827e-07	0.000544778
ENSMUSG00000022181	ENSMUSG00000022181	12274	C6	complement component 6	1.18675	6.84573	34.554	6.07503e-07	0.000544778
ENSMUSG00000032080	ENSMUSG00000032080	11808	Apoa4	apolipoprotein A-IV	-2.68094	9.94436	35.9483	6.94473e-07	0.000548277
ENSMUSG00000058135	ENSMUSG00000058135	14862	Gstm1	glutathione S-transferase, mu 1	-0.896762	10.5451	33.2643	7.13305e-07	0.000548277
ENSMUSG00000059908	ENSMUSG00000059908	17836	Mug1	murinoglobulin 1	0.83456	10.6023	32.6819	8.4712e-07	0.000607724
ENSMUSG00000038092	ENSMUSG00000038092	15496	Hsd3b5	hydroxy-delta-5-steroid dehydrogenase, 3 beta- and steroid delta-isomerase 5	6.02837	5.00265	35.0484	9.23924e-07	0.000621397
ENSMUSG00000029161	ENSMUSG00000029161	68567	Cgref1	cell growth regulator with EF hand domain 1	-2.41262	1.88462	31.9884	1.04144e-06	0.000659232
ENSMUSG00000022871	ENSMUSG00000022871	59083	Fetub	fetuin beta	0.811318	7.58367	30.5971	1.58574e-06	0.000948006
ENSMUSG00000028655	ENSMUSG00000028655	76574	Mfsd2a	major facilitator superfamily domain containing 2A	-1.24303	6.43027	30.6401	2.05452e-06	0.00116362
ENSMUSG00000087141	ENSMUSG00000087141	433022	Plcxd2	phosphatidylinositol-specific phospholipase C, X domain containing 2	0.870892	5.66045	28.461	3.07398e-06	0.00165395
ENSMUSG00000067656	ENSMUSG00000067656	171405	Slc22a27	solute carrier family 22, member 27	-1.83907	2.94437	27.723	4.39771e-06	0.00218444
ENSMUSG00000060548	ENSMUSG00000060548	29820	Tnfrsf19	tumor necrosis factor receptor superfamily, member 19	-1.31847	3.20444	27.2846	4.46591e-06	0.00218444
ENSMUSG00000023150	ENSMUSG00000023150	117198	Ivns1abp	influenza virus NS1A binding protein	-0.590556	6.54456	26.9331	4.9996e-06	0.00233916
ENSMUSG00000042207	ENSMUSG00000042207	75605	Kdm5b	lysine (K)-specific demethylase 5B	0.743571	4.68629	26.5366	5.68259e-06	0.00254793
ENSMUSG00000021236	ENSMUSG00000021236	12499	Entpd5	ectonucleoside triphosphate diphosphohydrolase 5	-0.510108	7.05505	26.3776	5.98332e-06	0.00257546
ENSMUSG00000039519	ENSMUSG00000039519	13123	Cyp7b1	cytochrome P450, family 7, subfamily b, polypeptide 1	1.62442	5.99798	27.2448	7.01834e-06	0.00280344
ENSMUSG00000028555	ENSMUSG00000028555	230603	Ttc39a	tetratricopeptide repeat domain 39A	-3.23215	1.30013	26.0251	7.03401e-06	0.00280344
ENSMUSG00000066361	ENSMUSG00000066361	16625	Serpina3c	serine (or cysteine) peptidase inhibitor, clade A, member 3C	1.46292	6.09767	26.6531	8.05273e-06	0.00309484
ENSMUSG00000021226	ENSMUSG00000021226	171210	Acot2	acyl-CoA thioesterase 2	-1.33478	4.97384	25.9878	8.60357e-06	0.00318553
ENSMUSG00000063590	ENSMUSG00000063590	434674	Slc22a28	solute carrier family 22, member 28	1.60664	3.32118	25.5962	8.88075e-06	0.00318553
ENSMUSG00000028445	ENSMUSG00000028445	69638	Enho	energy homeostasis associated	1.71761	2.99261	25.3542	9.44606e-06	0.003279
ENSMUSG00000032349	ENSMUSG00000032349	68801	Elovl5	ELOVL family member 5, elongation of long chain fatty acids (yeast)	-0.893499	9.97021	24.7937	1.00706e-05	0.00338656
ENSMUSG00000035441	ENSMUSG00000035441	338367	Myo1d	myosin ID	-0.8423	3.41452	24.4659	1.12347e-05	0.00354922
ENSMUSG00000079015	ENSMUSG00000079015	20702	Serpina1c	serine (or cysteine) peptidase inhibitor, clade A, member 1C	0.91147	12.912	24.3953	1.15034e-05	0.00354922
ENSMUSG00000035031	ENSMUSG00000035031	230558	C8a	complement component 8, alpha polypeptide	0.762967	8.28073	24.3848	1.15438e-05	0.00354922
ENSMUSG00000062181	ENSMUSG00000062181	13909	Ces3b	carboxylesterase 3B	1.40688	8.59551	25.2496	1.23128e-05	0.00368049
ENSMUSG00000020102	ENSMUSG00000020102	20503	Slc16a7	solute carrier family 16 (monocarboxylic acid transporters), member 7	-0.80296	5.65291	24.0016	1.313e-05	0.0038187
ENSMUSG00000091867	ENSMUSG00000091867	233005	Cyp2a22	cytochrome P450, family 2, subfamily a, polypeptide 22	-1.46234	3.7862	23.7736	1.66894e-05	0.00472618
ENSMUSG00000032377	ENSMUSG00000032377	235527	Plscr4	phospholipid scramblase 4	-1.19831	2.32722	22.9636	1.86833e-05	0.00504475
ENSMUSG00000041698	ENSMUSG00000041698	28248	Slco1a1	solute carrier organic anion transporter family, member 1a1	2.99421	7.03903	24.3372	1.88727e-05	0.00504475
ENSMUSG00000078683	ENSMUSG00000078683	17840	Mup1	major urinary protein 1	2.19448	12.3803	24.1522	1.92208e-05	0.00504475
ENSMUSG00000078687	ENSMUSG00000078687	100041687	Mup8	major urinary protein 8	2.15521	12.3054	23.8906	2.08544e-05	0.0053432
ENSMUSG00000059060	ENSMUSG00000059060	19363	Rad51b	RAD51 paralog B	-2.34356	3.83537	23.6927	2.15093e-05	0.00538283
ENSMUSG00000027048	ENSMUSG00000027048	27413	Abcb11	ATP-binding cassette, sub-family B (MDR/TAP), member 11	0.538586	7.64905	22.4022	2.26674e-05	0.00540606
ENSMUSG00000057666	ENSMUSG00000057666	14433	Gapdh	glyceraldehyde-3-phosphate dehydrogenase	-0.698533	7.40913	22.3243	2.32872e-05	0.00540606
ENSMUSG00000031489	ENSMUSG00000031489	11556	Adrb3	adrenergic receptor, beta 3	1.39597	2.74355	22.3179	2.33385e-05	0.00540606
ENSMUSG00000073842	ENSMUSG00000073842	100041658	Mup7	major urinary protein 7	2.7295	12.6753	23.5701	2.36116e-05	0.00540606
ENSMUSG00000025255	ENSMUSG00000025255	80892	Zfhx4	zinc finger homeodomain 4	0.579247	4.62266	22.2189	2.41537e-05	0.00541497
ENSMUSG00000024424	ENSMUSG00000024424	72747	Ttc39c	tetratricopeptide repeat domain 39C	0.878444	6.88472	22.2533	2.56722e-05	0.00553136
ENSMUSG00000030131	ENSMUSG00000030131	17837	Mug2	murinoglobulin 2	0.665143	9.302	22.0402	2.57009e-05	0.00553136
ENSMUSG00000030278	ENSMUSG00000030278	14311	Cidec	cell death-inducing DFFA-like effector c	-2.409	4.82707	23.1213	2.70169e-05	0.00570058
ENSMUSG00000049721	ENSMUSG00000049721	53897	Gal3st1	galactose-3-O-sulfotransferase 1	-2.367	0.738983	21.6823	2.91205e-05	0.00602626
ENSMUSG00000062949	ENSMUSG00000062949	320940	Atp11c	ATPase, class VI, type 11C	0.618397	6.75906	21.5499	3.05031e-05	0.00619328
ENSMUSG00000028961	ENSMUSG00000028961	110208	Pgd	phosphogluconate dehydrogenase	-0.838703	4.95277	21.1132	3.55742e-05	0.00695516
ENSMUSG00000041324	ENSMUSG00000041324	16323	Inhba	inhibin beta-A	1.39857	2.81929	21.0778	3.60222e-05	0.00695516
ENSMUSG00000031298	ENSMUSG00000031298	237175	Adgrg2	adhesion G protein-coupled receptor G2	-1.57172	1.93065	20.9864	3.7207e-05	0.00695516
ENSMUSG00000015947	ENSMUSG00000015947	14129	Fcgr1	Fc receptor, IgG, high affinity I	-1.65466	1.61964	20.9666	3.74689e-05	0.00695516
ENSMUSG00000034528	ENSMUSG00000034528	243168	Hsd17b13	hydroxysteroid (17-beta) dehydrogenase 13	-0.675214	8.69685	20.8617	3.88888e-05	0.00695516
ENSMUSG00000040123	ENSMUSG00000040123	219105	Zmym5	zinc finger, MYM-type 5	0.492501	5.11803	20.8518	3.90261e-05	0.00695516
ENSMUSG00000001763	ENSMUSG00000001763	232670	Tspan33	tetraspanin 33	1.19453	2.45198	20.8341	3.92714e-05	0.00695516
ENSMUSG00000078597	ENSMUSG00000078597	13118	Cyp4a12b	cytochrome P450, family 4, subfamily a, polypeptide 12B	1.42803	5.98743	21.6794	3.94262e-05	0.00695516
ENSMUSG00000078673	ENSMUSG00000078673	100048885	Gm2083	major urinary protein LOC100048885	2.01962	12.6977	21.7697	4.07541e-05	0.00707346
ENSMUSG00000072115	ENSMUSG00000072115	11727	Ang	angiogenin, ribonuclease, RNase A family, 5	0.920851	7.57345	20.8172	4.39626e-05	0.00744611
ENSMUSG00000003849	ENSMUSG00000003849	18104	Nqo1	NAD(P)H dehydrogenase, quinone 1	-1.33144	2.31759	20.4968	4.4285e-05	0.00744611
ENSMUSG00000096674	ENSMUSG00000096674	100039150	Mup15	major urinary protein 15	2.62739	12.5718	21.4728	4.61148e-05	0.00763449
ENSMUSG00000028664	ENSMUSG00000028664	13844	Ephb2	Eph receptor B2	-3.16314	1.31755	20.4517	4.89955e-05	0.00793337
ENSMUSG00000017167	ENSMUSG00000017167	53321	Cntnap1	contactin associated protein-like 1	-2.23834	1.61376	20.1919	4.93947e-05	0.00793337
ENSMUSG00000026489	ENSMUSG00000026489	67426	Coq8a	coenzyme Q8A	0.652848	6.62278	20.1033	5.09928e-05	0.00802998
ENSMUSG00000039457	ENSMUSG00000039457	19041	Ppl	periplakin	-1.40855	2.53841	20.0758	5.14993e-05	0.00802998
ENSMUSG00000049103	ENSMUSG00000049103	12772	Ccr2	chemokine (C-C motif) receptor 2	-1.83501	2.00556	20.0364	5.22348e-05	0.00802998
ENSMUSG00000045934	ENSMUSG00000045934	194126	Mtmr11	myotubularin related protein 11	-2.73729	1.89776	20.3062	5.45333e-05	0.00826526
ENSMUSG00000078686	ENSMUSG00000078686	100038948	Mup9	major urinary protein 9	2.0977	12.2201	20.6771	5.89553e-05	0.00881135
ENSMUSG00000021932	ENSMUSG00000021932	67153	Rnaseh2b	ribonuclease H2, subunit B	-0.829912	3.10004	19.5542	6.21857e-05	0.00913558
ENSMUSG00000097328	ENSMUSG00000097328	21944	Tnfsf12	tumor necrosis factor (ligand) superfamily, member 12	-0.913289	3.02094	19.5262	6.28225e-05	0.00913558
ENSMUSG00000022947	ENSMUSG00000022947	109857	Cbr3	carbonyl reductase 3	-2.52952	1.64725	19.4006	7.03986e-05	0.0101008
ENSMUSG00000026688	ENSMUSG00000026688	66447	Mgst3	microsomal glutathione S-transferase 3	-1.37595	3.86967	19.3834	7.7012e-05	0.0106606
ENSMUSG00000031327	ENSMUSG00000031327	12212	Chic1	cysteine-rich hydrophobic domain 1	1.43851	2.49626	18.9112	7.86469e-05	0.0106606
ENSMUSG00000024694	ENSMUSG00000024694	64697	Keg1	kidney expressed gene 1	0.968038	6.02364	19.2612	7.91587e-05	0.0106606
ENSMUSG00000073830	ENSMUSG00000073830	100039116	Mup14	major urinary protein 14	1.47363	13.5367	19.5151	8.01168e-05	0.0106606
ENSMUSG00000069922	ENSMUSG00000069922	382053	Ces3a	carboxylesterase 3A	0.645641	10.3618	18.8572	8.02243e-05	0.0106606
ENSMUSG00000029273	ENSMUSG00000029273	53315	Sult1d1	sulfotransferase family 1D, member 1	0.55727	6.3221	18.8565	8.02444e-05	0.0106606
ENSMUSG00000023232	ENSMUSG00000023232	230779	Serinc2	serine incorporator 2	-0.965723	3.94464	18.8067	8.17283e-05	0.0107253
ENSMUSG00000045775	ENSMUSG00000045775	217316	Slc16a5	solute carrier family 16 (monocarboxylic acid transporters), member 5	-1.12088	3.44698	18.7305	8.40543e-05	0.0108493
ENSMUSG00000087385	ENSMUSG00000087385	433752	Frg2f1	FSHD region gene 2 family member 1	0.93502	2.88569	18.71	8.46895e-05	0.0108493
ENSMUSG00000026355	ENSMUSG00000026355	17219	Mcm6	minichromosome maintenance complex component 6	-1.72343	1.79124	18.5589	8.95479e-05	0.011085
ENSMUSG00000026740	ENSMUSG00000026740	13418	Dnajc1	DnaJ heat shock protein family (Hsp40) member C1	0.380521	6.13968	18.5447	9.00187e-05	0.011085
ENSMUSG00000012187	ENSMUSG00000012187	68393	Mogat1	monoacylglycerol O-acyltransferase 1	-1.61571	2.45888	18.6219	9.00492e-05	0.011085
ENSMUSG00000094793	ENSMUSG00000094793	100039054	Mup12	major urinary protein 12	2.64664	10.8082	19.4373	9.065e-05	0.011085
ENSMUSG00000023176	ENSMUSG00000023176	71756	Cpn2	carboxypeptidase N, polypeptide 2	0.446262	7.17916	18.3156	9.79965e-05	0.0117037
ENSMUSG00000059326	ENSMUSG00000059326	12982	Csf2ra	colony stimulating factor 2 receptor, alpha, low-affinity (granulocyte-macrophage)	-1.24984	2.6774	18.3065	9.83254e-05	0.0117037
ENSMUSG00000040891	ENSMUSG00000040891	15377	Foxa3	forkhead box A3	0.899643	5.87683	18.5085	9.98884e-05	0.0117037
ENSMUSG00000006641	ENSMUSG00000006641	330064	Slc5a6	solute carrier family 5 (sodium-dependent vitamin transporter), member 6	-0.960639	4.13703	18.3062	0.000100059	0.0117037
ENSMUSG00000021208	ENSMUSG00000021208	217845	Ifi27l2b	interferon, alpha-inducible protein 27 like 2B	-1.85366	4.26471	18.8346	0.00010675	0.0123521
ENSMUSG00000020123	ENSMUSG00000020123	54140	Avpr1a	arginine vasopressin receptor 1A	1.56048	3.19318	18.3885	0.000109247	0.0124273
ENSMUSG00000057880	ENSMUSG00000057880	268860	Abat	4-aminobutyrate aminotransferase	0.477722	7.0771	18.0123	0.00010971	0.0124273
ENSMUSG00000078688	ENSMUSG00000078688	17841	Mup2	major urinary protein 2	1.38474	13.4449	18.4645	0.000114537	0.0128388
ENSMUSG00000061292	ENSMUSG00000061292	100041449	Cyp3a59	cytochrome P450, family 3, subfamily a, polypeptide 59	-0.875914	3.52317	17.8067	0.000118483	0.0131443
ENSMUSG00000032310	ENSMUSG00000032310	13077	Cyp1a2	cytochrome P450, family 1, subfamily a, polypeptide 2	0.98304	9.0075	18.0251	0.000124932	0.0136732
ENSMUSG00000025873	ENSMUSG00000025873	76577	Faf2	Fas associated factor family member 2	0.421155	5.07521	17.6472	0.000125792	0.0136732
ENSMUSG00000019066	ENSMUSG00000019066	19340	Rab3d	RAB3D, member RAS oncogene family	-1.09258	3.16475	17.6177	0.000127192	0.0136871
ENSMUSG00000066366	ENSMUSG00000066366	20700	Serpina1a	serine (or cysteine) peptidase inhibitor, clade A, member 1A	0.808726	12.0266	17.5892	0.000128564	0.0136978
ENSMUSG00000032418	ENSMUSG00000032418	17436	Me1	malic enzyme 1, NADP(+)-dependent, cytosolic	-0.965034	7.43734	17.8434	0.000134006	0.0141377
ENSMUSG00000089873	ENSMUSG00000089873	100039089	Mup13	major urinary protein 13	1.37421	13.5853	17.9226	0.000139043	0.0145266
ENSMUSG00000030545	ENSMUSG00000030545	18631	Pex11a	peroxisomal biogenesis factor 11 alpha	-0.730362	8.55551	17.3608	0.00014135	0.0146252
ENSMUSG00000091780	ENSMUSG00000091780	100126824	Sco2	SCO2 cytochrome c oxidase assembly protein	0.69878	6.08298	17.2967	0.000143568	0.0146252
ENSMUSG00000078680	ENSMUSG00000078680	100039008	Mup10	major urinary protein 10	1.28299	13.6634	17.7333	0.000144833	0.0146252
ENSMUSG00000027750	ENSMUSG00000027750	50706	Postn	periostin, osteoblast specific factor	-1.33101	1.99016	17.2438	0.000146474	0.0146252
ENSMUSG00000026272	ENSMUSG00000026272	11611	Agxt	alanine-glyoxylate aminotransferase	0.740814	6.79517	17.3034	0.00014726	0.0146252
ENSMUSG00000056035	ENSMUSG00000056035	13112	Cyp3a11	cytochrome P450, family 3, subfamily a, polypeptide 11	-1.5863	8.89396	17.9462	0.000148141	0.0146252
ENSMUSG00000026950	ENSMUSG00000026950	17996	Neb	nebulin	0.946476	5.01226	17.2942	0.00015623	0.0152835
ENSMUSG00000021876	ENSMUSG00000021876	58809	Rnase4	ribonuclease, RNase A family 4	0.75815	9.5694	17.0854	0.000157959	0.0153135
ENSMUSG00000052062	ENSMUSG00000052062	72823	Pard3b	par-3 family cell polarity regulator beta	0.704108	3.59321	16.9922	0.000161152	0.0154494
ENSMUSG00000024986	ENSMUSG00000024986	15242	Hhex	hematopoietically expressed homeobox	0.863984	5.5204	17.1558	0.000162232	0.0154494
ENSMUSG00000029822	ENSMUSG00000029822	71720	Osbpl3	oxysterol binding protein-like 3	-1.40617	4.56164	17.4951	0.000163949	0.0154759
ENSMUSG00000031443	ENSMUSG00000031443	14068	F7	coagulation factor VII	0.676392	6.16515	16.9012	0.000166832	0.0156112
ENSMUSG00000022090	ENSMUSG00000022090	213019	Pdlim2	PDZ and LIM domain 2	-1.46604	2.10452	16.8605	0.000169446	0.0156375
ENSMUSG00000066153	ENSMUSG00000066153	381531	Mup21	major urinary protein 21	1.14781	7.03708	17.4021	0.00017002	0.0156375
ENSMUSG00000028359	ENSMUSG00000028359	18407	Orm3	orosomucoid 3	-1.2409	3.46093	16.9294	0.000177172	0.0160334
ENSMUSG00000026426	ENSMUSG00000026426	68724	Arl8a	ADP-ribosylation factor-like 8A	-0.899203	3.10889	16.7418	0.000177305	0.0160334
ENSMUSG00000074272	ENSMUSG00000074272	26365	Ceacam1	carcinoembryonic antigen-related cell adhesion molecule 1	0.407528	6.6952	16.7085	0.000179576	0.0161034
ENSMUSG00000040583	ENSMUSG00000040583	13089	Cyp2b13	cytochrome P450, family 2, subfamily b, polypeptide 13	-2.97168	1.64113	18.0699	0.000183263	0.0161641
ENSMUSG00000070348	ENSMUSG00000070348	12443	Ccnd1	cyclin D1	-1.07957	5.9051	17.0646	0.000185398	0.0161641
ENSMUSG00000020458	ENSMUSG00000020458	68585	Rtn4	reticulon 4	-0.634046	6.45024	16.6215	0.000185657	0.0161641
ENSMUSG00000021094	ENSMUSG00000021094	66375	Dhrs7	dehydrogenase/reductase (SDR family) member 7	-0.587764	5.24288	16.613	0.000186261	0.0161641
ENSMUSG00000032802	ENSMUSG00000032802	76650	Srxn1	sulfiredoxin 1 homolog (S. cerevisiae)	-0.731841	5.52465	16.5493	0.000190874	0.0161674
ENSMUSG00000039601	ENSMUSG00000039601	53901	Rcan2	regulator of calcineurin 2	-1.03984	3.02005	16.54	0.000191556	0.0161674
ENSMUSG00000020053	ENSMUSG00000020053	16000	Igf1	insulin-like growth factor 1	0.386248	9.41566	16.5331	0.000192063	0.0161674
ENSMUSG00000031838	ENSMUSG00000031838	65972	Ifi30	interferon gamma inducible protein 30	-0.842876	4.96193	16.6117	0.000192308	0.0161674
ENSMUSG00000060613	ENSMUSG00000060613	226105	Cyp2c70	cytochrome P450, family 2, subfamily c, polypeptide 70	0.89265	7.26768	16.7778	0.000196202	0.0163429
ENSMUSG00000110439	ENSMUSG00000110439	100861909	Mup22	major urinary protein 22	1.26801	13.6999	16.891	0.000197555	0.0163429
ENSMUSG00000049109	ENSMUSG00000049109	210757	Themis	thymocyte selection associated	-1.28351	3.3597	16.6325	0.000198952	0.0163429
ENSMUSG00000027207	ENSMUSG00000027207	69976	Galk2	galactokinase 2	-0.914634	3.09209	16.4124	0.000201181	0.0164008
ENSMUSG00000067225	ENSMUSG00000067225	404195	Cyp2c54	cytochrome P450, family 2, subfamily c, polypeptide 54	1.95672	6.9252	17.094	0.000204457	0.0165426
ENSMUSG00000032420	ENSMUSG00000032420	23959	Nt5e	5' nucleotidase, ecto	-1.4794	2.43499	16.2823	0.000214615	0.0171955
ENSMUSG00000037405	ENSMUSG00000037405	15894	Icam1	intercellular adhesion molecule 1	-1.07735	3.46215	16.2685	0.000215723	0.0171955
ENSMUSG00000054428	ENSMUSG00000054428	11983	Atpif1	ATPase inhibitory factor 1	-0.516962	5.35063	16.1188	0.000225312	0.017805
ENSMUSG00000063450	ENSMUSG00000063450	319565	Syne2	spectrin repeat containing, nuclear envelope 2	0.59673	4.91701	16.0926	0.000227609	0.017805
ENSMUSG00000004207	ENSMUSG00000004207	19156	Psap	prosaposin	-0.496628	8.93901	16.0844	0.000228333	0.017805
ENSMUSG00000067235	ENSMUSG00000067235	15007	H2-Q10	histocompatibility 2, Q region locus 10	-0.376742	10.6872	15.9588	0.000239728	0.0185591
ENSMUSG00000050359	ENSMUSG00000050359	20753	Sprr1a	small proline-rich protein 1A	-4.06742	1.63987	16.406	0.000245411	0.0188634
ENSMUSG00000066829	ENSMUSG00000066829	235050	Zfp810	zinc finger protein 810	-1.53888	1.73576	15.8669	0.000248444	0.018961
ENSMUSG00000031906	ENSMUSG00000031906	58994	Smpd3	sphingomyelin phosphodiesterase 3, neutral	-1.9774	1.6607	15.7254	0.000262513	0.0198937
ENSMUSG00000042390	ENSMUSG00000042390	229542	Gatad2b	GATA zinc finger domain containing 2B	0.421105	5.53054	15.6371	0.000271714	0.0204469
ENSMUSG00000056071	ENSMUSG00000056071	20202	S100a9	S100 calcium binding protein A9 (calgranulin B)	-1.46407	1.65455	15.6114	0.000274462	0.0205103
ENSMUSG00000049421	ENSMUSG00000049421	26466	Zfp260	zinc finger protein 260	0.510445	4.29744	15.5792	0.000277939	0.0206269
ENSMUSG00000073834	ENSMUSG00000073834	100039028	Mup11	major urinary protein 11	1.81125	11.9944	16.0862	0.000290584	0.0214177
ENSMUSG00000041333	ENSMUSG00000041333	17843	Mup4	major urinary protein 4	1.2221	6.92987	15.9084	0.000300212	0.0219767
ENSMUSG00000078612	ENSMUSG00000078612	242594	Fyb2	FYN binding protein 2	-1.28531	2.10126	15.2492	0.000316356	0.0228987
ENSMUSG00000022856	ENSMUSG00000022856	66664	Tmem41a	transmembrane protein 41a	-0.781361	3.86129	15.2433	0.000317094	0.0228987
ENSMUSG00000026638	ENSMUSG00000026638	54139	Irf6	interferon regulatory factor 6	0.71555	3.95026	15.2266	0.00031919	0.0228987
ENSMUSG00000068877	ENSMUSG00000068877	20342	Selenbp2	selenium binding protein 2	1.03874	7.18094	15.6069	0.000324687	0.0231045
ENSMUSG00000042102	ENSMUSG00000042102	74129	Dmgdh	dimethylglycine dehydrogenase precursor	0.547431	7.69534	15.1671	0.00032676	0.0231045
ENSMUSG00000054823	ENSMUSG00000054823	234135	Nsd3	nuclear receptor binding SET domain protein 3	0.497496	6.05475	15.1536	0.0003285	0.0231045
ENSMUSG00000024292	ENSMUSG00000024292	64385	Cyp4f14	cytochrome P450, family 4, subfamily f, polypeptide 14	0.8862	7.13757	15.3931	0.000334047	0.0233421
ENSMUSG00000005220	ENSMUSG00000005220	53419	Corin	corin, serine peptidase	-2.46524	0.467344	15.0444	0.000342978	0.0238115
ENSMUSG00000041959	ENSMUSG00000041959	20194	S100a10	S100 calcium binding protein A10 (calpactin)	-0.600912	7.42318	14.9454	0.000356681	0.0246041
ENSMUSG00000027712	ENSMUSG00000027712	11747	Anxa5	annexin A5	-1.1433	6.68317	15.3887	0.000359114	0.0246142
ENSMUSG00000027890	ENSMUSG00000027890	14865	Gstm4	glutathione S-transferase, mu 4	-0.543216	5.19083	14.8886	0.000364799	0.0247286
ENSMUSG00000002831	ENSMUSG00000002831	57435	Plin4	perilipin 4	-1.10779	4.94623	15.2372	0.000365379	0.0247286
ENSMUSG00000049723	ENSMUSG00000049723	17381	Mmp12	matrix metallopeptidase 12	-2.82093	2.22563	15.3013	0.00037039	0.024911
ENSMUSG00000022766	ENSMUSG00000022766	15160	Serpind1	serine (or cysteine) peptidase inhibitor, clade D, member 1	0.360178	8.45904	14.8133	0.000375861	0.0249948
ENSMUSG00000039323	ENSMUSG00000039323	16008	Igfbp2	insulin-like growth factor binding protein 2	1.24009	6.56183	15.3111	0.00037628	0.0249948
ENSMUSG00000052562	ENSMUSG00000052562	319800	Slc22a30	solute carrier family 22, member 30	0.72277	6.20179	14.8667	0.000381838	0.0252083
ENSMUSG00000056671	ENSMUSG00000056671	77619	Prelid2	PRELI domain containing 2	-1.7126	2.34791	14.8951	0.000387039	0.0252494
ENSMUSG00000075595	ENSMUSG00000075595	268469	Zfp652	zinc finger protein 652	0.467462	4.77781	14.7388	0.000387152	0.0252494
ENSMUSG00000002059	ENSMUSG00000002059	19376	Rab34	RAB34, member RAS oncogene family	-1.03137	2.92609	14.6533	0.000400556	0.025952
ENSMUSG00000044748	ENSMUSG00000044748	13214	Defb1	defensin beta 1	-1.09696	3.54788	14.6851	0.000411364	0.025952
ENSMUSG00000072294	ENSMUSG00000072294	16597	Klf12	Kruppel-like factor 12	0.656759	4.72774	14.5864	0.000411381	0.025952
ENSMUSG00000029674	ENSMUSG00000029674	16885	Limk1	LIM-domain containing, protein kinase	-1.26507	2.13524	14.5857	0.000411502	0.025952
ENSMUSG00000024039	ENSMUSG00000024039	12411	Cbs	cystathionine beta-synthase	0.591044	8.11703	14.5822	0.000412073	0.025952
ENSMUSG00000078689	ENSMUSG00000078689	620807	Mup6	major urinary protein 6	1.13408	4.28204	14.8518	0.000414703	0.025952
ENSMUSG00000058523	ENSMUSG00000058523	17844	Mup5	major urinary protein 5	1.31095	6.74088	15.0798	0.000414807	0.025952
ENSMUSG00000022868	ENSMUSG00000022868	11625	Ahsg	alpha-2-HS-glycoprotein	0.467343	12.9401	14.4794	0.000429349	0.0265846
ENSMUSG00000035133	ENSMUSG00000035133	11855	Arhgap5	Rho GTPase activating protein 5	0.372057	6.53569	14.4764	0.00042986	0.0265846
ENSMUSG00000023057	ENSMUSG00000023057	14079	Fabp2	fatty acid binding protein 2, intestinal	-0.548196	7.47184	14.4311	0.000437724	0.0269163
ENSMUSG00000043079	ENSMUSG00000043079	104027	Synpo	synaptopodin	-1.31937	2.97824	14.4684	0.000452977	0.0275765
ENSMUSG00000052151	ENSMUSG00000052151	50784	Plpp2	phospholipid phosphatase 2	-0.730154	4.39826	14.3384	0.000454271	0.0275765
ENSMUSG00000002032	ENSMUSG00000002032	71687	Tmem25	transmembrane protein 25	0.632361	4.63368	14.3282	0.00045615	0.0275765
ENSMUSG00000030681	ENSMUSG00000030681	78388	Mvp	major vault protein	-0.650843	4.03992	14.244	0.000471824	0.0283648
ENSMUSG00000010307	ENSMUSG00000010307	67893	Tmem86a	transmembrane protein 86A	-1.13934	3.97501	14.4208	0.00048174	0.0288
ENSMUSG00000033427	ENSMUSG00000033427	103149	Upb1	ureidopropionase, beta	0.432006	8.01902	14.1557	0.00048887	0.0290648
ENSMUSG00000024975	ENSMUSG00000024975	18569	Pdcd4	programmed cell death 4	0.491117	7.08534	14.1124	0.000497476	0.0294139
ENSMUSG00000034947	ENSMUSG00000034947	217203	Tmem106a	transmembrane protein 106A	-0.589076	3.61893	14.0843	0.000503146	0.0295866
ENSMUSG00000021102	ENSMUSG00000021102	73046	Glrx5	glutaredoxin 5	-0.381203	7.45772	14.02	0.000516359	0.0301253
ENSMUSG00000032207	ENSMUSG00000032207	15450	Lipc	lipase, hepatic	0.569998	6.29233	14.0126	0.000517906	0.0301253
ENSMUSG00000037411	ENSMUSG00000037411	18787	Serpine1	serine (or cysteine) peptidase inhibitor, clade E, member 1	-1.66737	2.06943	14.037	0.000526113	0.0304382
ENSMUSG00000040466	ENSMUSG00000040466	233016	Blvrb	biliverdin reductase B (flavin reductase (NADPH))	-0.415768	7.26632	13.9012	0.000541759	0.0311758
ENSMUSG00000017418	ENSMUSG00000017418	75869	Arl5b	ADP-ribosylation factor-like 5B	0.620047	4.0789	13.8745	0.000547636	0.0312552
ENSMUSG00000030541	ENSMUSG00000030541	269951	Idh2	isocitrate dehydrogenase 2 (NADP+), mitochondrial	-0.556846	6.99632	13.8319	0.00055718	0.0312552
ENSMUSG00000031451	ENSMUSG00000031451	14456	Gas6	growth arrest specific 6	-1.40515	5.13793	14.2779	0.000558975	0.0312552
ENSMUSG00000063760	ENSMUSG00000063760	268291	Rnf217	ring finger protein 217	0.586007	4.07579	13.8144	0.000561146	0.0312552
ENSMUSG00000051579	ENSMUSG00000051579	66684	Tceal8	transcription elongation factor A (SII)-like 8	-0.866971	4.73035	13.9281	0.000563702	0.0312552
ENSMUSG00000051748	ENSMUSG00000051748	66107	Wfdc21	WAP four-disulfide core domain 21	0.691503	9.83117	13.8121	0.000568034	0.0312552
ENSMUSG00000034584	ENSMUSG00000034584	320051	Exph5	exophilin 5	0.682955	3.15315	13.782	0.000568554	0.0312552
ENSMUSG00000037071	ENSMUSG00000037071	20249	Scd1	stearoyl-Coenzyme A desaturase 1	-1.20534	12.1027	14.144	0.000569069	0.0312552
ENSMUSG00000075254	ENSMUSG00000075254	77446	Heg1	heart development protein with EGF-like domains 1	-0.634355	3.61668	13.7789	0.00056928	0.0312552
ENSMUSG00000041773	ENSMUSG00000041773	13803	Enc1	ectodermal-neural cortex 1	-0.988513	4.05095	13.8513	0.00058468	0.0315408
ENSMUSG00000032808	ENSMUSG00000032808	13097	Cyp2c38	cytochrome P450, family 2, subfamily c, polypeptide 38	-0.775429	6.06785	13.843	0.000589018	0.0315408
ENSMUSG00000041028	ENSMUSG00000041028	66092	Ghitm	growth hormone inducible transmembrane protein	-0.48483	7.91747	13.6916	0.000589821	0.0315408
ENSMUSG00000027907	ENSMUSG00000027907	20195	S100a11	S100 calcium binding protein A11	-1.76706	4.34989	14.1702	0.000591641	0.0315408
ENSMUSG00000021185	ENSMUSG00000021185	217830	Dglucy	D-glutamate cyclase	-0.481507	5.16634	13.6761	0.000593553	0.0315408
ENSMUSG00000037797	ENSMUSG00000037797	26876	Adh4	alcohol dehydrogenase 4 (class II), pi polypeptide	0.516836	5.79033	13.6703	0.000594938	0.0315408
ENSMUSG00000029176	ENSMUSG00000029176	52206	Anapc4	anaphase promoting complex subunit 4	-0.623515	3.84193	13.6701	0.000594999	0.0315408
ENSMUSG00000032431	ENSMUSG00000032431	56693	Crtap	cartilage associated protein	-1.02512	2.57582	13.5885	0.000615085	0.0324457
ENSMUSG00000037780	ENSMUSG00000037780	17194	Mbl1	mannose-binding lectin (protein A) 1	0.386231	7.12904	13.4806	0.000642746	0.0337395
ENSMUSG00000042903	ENSMUSG00000042903	54601	Foxo4	forkhead box O4	0.716941	3.74693	13.4328	0.000655426	0.0342381
ENSMUSG00000059714	ENSMUSG00000059714	14251	Flot1	flotillin 1	-0.83557	4.36115	13.3806	0.000687292	0.0357292
ENSMUSG00000021268	ENSMUSG00000021268	17263	Meg3	maternally expressed 3	1.48427	1.64872	13.2792	0.00069795	0.0361089
ENSMUSG00000078675	ENSMUSG00000078675	100039177	Mup16	major urinary protein 16	1.40206	11.7456	13.6712	0.000705878	0.0362507
ENSMUSG00000064120	ENSMUSG00000064120	56738	Mocs1	molybdenum cofactor synthesis 1	0.539678	5.59714	13.2463	0.000707429	0.0362507
ENSMUSG00000001366	ENSMUSG00000001366	71538	Fbxo9	f-box protein 9	0.380327	5.95129	13.2267	0.000713138	0.0362596
ENSMUSG00000068220	ENSMUSG00000068220	16852	Lgals1	lectin, galactose binding, soluble 1	-1.21413	6.42103	13.6363	0.000715105	0.0362596
ENSMUSG00000040562	ENSMUSG00000040562	14863	Gstm2	glutathione S-transferase, mu 2	-0.820437	6.54472	13.4173	0.000717712	0.0362596
ENSMUSG00000039246	ENSMUSG00000039246	226791	Lyplal1	lysophospholipase-like 1	-0.646581	4.06884	13.1713	0.000729559	0.0365324
ENSMUSG00000042195	ENSMUSG00000042195	72022	Slc35f2	solute carrier family 35, member F2	-1.48849	1.85343	13.1697	0.000730048	0.0365324
ENSMUSG00000036611	ENSMUSG00000036611	67484	Eepd1	endonuclease/exonuclease/phosphatase family domain containing 1	-0.607358	4.6955	13.1589	0.000733297	0.0365324
ENSMUSG00000027332	ENSMUSG00000027332	56357	Ivd	isovaleryl coenzyme A dehydrogenase	0.490216	6.17402	13.1176	0.000745842	0.0369862
ENSMUSG00000029233	ENSMUSG00000029233	57357	Srd5a3	steroid 5 alpha-reductase 3	-0.564293	3.80721	13.099	0.000751591	0.0370545
ENSMUSG00000038576	ENSMUSG00000038576	96935	Susd4	sushi domain containing 4	1.4606	4.02418	13.4711	0.000754505	0.0370545
ENSMUSG00000021814	ENSMUSG00000021814	11750	Anxa7	annexin A7	-0.430253	5.66586	13.0798	0.00075755	0.0370545
ENSMUSG00000096688	ENSMUSG00000096688	100039206	Mup17	major urinary protein 17	1.74259	11.1171	13.5127	0.000767983	0.0372802
ENSMUSG00000009575	ENSMUSG00000009575	12419	Cbx5	chromobox 5	0.372296	5.44621	13.0431	0.000769093	0.0372802
ENSMUSG00000035357	ENSMUSG00000035357	55983	Pdzrn3	PDZ domain containing RING finger 3	-0.874277	2.90096	12.9695	0.000792778	0.038047
ENSMUSG00000005447	ENSMUSG00000005447	18476	Pafah1b3	platelet-activating factor acetylhydrolase, isoform 1b, subunit 3	-1.0137	2.38464	12.9621	0.000795223	0.038047
ENSMUSG00000040274	ENSMUSG00000040274	12571	Cdk6	cyclin-dependent kinase 6	-0.488765	6.32798	12.9612	0.000795519	0.038047
ENSMUSG00000026918	ENSMUSG00000026918	67382	Brd3	bromodomain containing 3	0.425011	6.40889	12.9132	0.000811443	0.0386138
ENSMUSG00000076441	ENSMUSG00000076441	11898	Ass1	argininosuccinate synthetase 1	0.737522	9.23107	13.0116	0.000814891	0.0386138
ENSMUSG00000070730	ENSMUSG00000070730	67809	Rmdn3	regulator of microtubule dynamics 3	-0.401752	6.46021	12.8933	0.000818134	0.0386138
ENSMUSG00000015597	ENSMUSG00000015597	57908	Zfp318	zinc finger protein 318	0.407661	5.27462	12.8705	0.0008259	0.0388101
ENSMUSG00000032366	ENSMUSG00000032366	22003	Tpm1	tropomyosin 1, alpha	-0.696469	5.15415	12.8523	0.000841508	0.0393716
ENSMUSG00000024665	ENSMUSG00000024665	56473	Fads2	fatty acid desaturase 2	-0.584127	9.16327	12.8078	0.000847622	0.039486
ENSMUSG00000041625	ENSMUSG00000041625	223267	Ggact	gamma-glutamylamine cyclotransferase	0.501756	6.1316	12.7898	0.000853954	0.0396095
ENSMUSG00000026471	ENSMUSG00000026471	15064	Mr1	major histocompatibility complex, class I-related	-1.17745	1.81014	12.7601	0.000864546	0.0399287
ENSMUSG00000030827	ENSMUSG00000030827	56636	Fgf21	fibroblast growth factor 21	-1.72757	2.12549	12.8586	0.000873989	0.0401923
ENSMUSG00000030787	ENSMUSG00000030787	114332	Lyve1	lymphatic vessel endothelial hyaluronan receptor 1	-0.84168	4.5872	12.7687	0.000899825	0.0412043
ENSMUSG00000047368	ENSMUSG00000047368	226016	Abhd17b	abhydrolase domain containing 17B	0.417412	4.74313	12.4505	0.000983378	0.0448395
ENSMUSG00000002058	ENSMUSG00000002058	22248	Unc119	unc-119 lipid binding chaperone	-0.963659	2.98778	12.4249	0.000993952	0.0450695
ENSMUSG00000068086	ENSMUSG00000068086	13105	Cyp2d9	cytochrome P450, family 2, subfamily d, polypeptide 9	0.759203	9.76959	12.5243	0.00100037	0.0450695
ENSMUSG00000041828	ENSMUSG00000041828	217258	Abca8a	ATP-binding cassette, sub-family A (ABC1), member 8a	0.856523	5.80957	12.6102	0.00100439	0.0450695
ENSMUSG00000004038	ENSMUSG00000004038	14864	Gstm3	glutathione S-transferase, mu 3	-1.95489	5.84715	12.8176	0.00100955	0.0450695
ENSMUSG00000033713	ENSMUSG00000033713	71375	Foxn3	forkhead box N3	0.403292	7.07694	12.3842	0.00101102	0.0450695
ENSMUSG00000024164	ENSMUSG00000024164	12266	C3	complement component 3	0.540474	10.734	12.3684	0.00101771	0.0450695
ENSMUSG00000041846	ENSMUSG00000041846	68734	Ppp4r3a	protein phosphatase 4 regulatory subunit 3A	0.398547	5.23864	12.3683	0.00101774	0.0450695
ENSMUSG00000034634	ENSMUSG00000034634	17068	Ly6d	lymphocyte antigen 6 complex, locus D	-3.07517	5.1167	12.7446	0.00104482	0.045934
ENSMUSG00000089762	ENSMUSG00000089762	72500	Ier5l	immediate early response 5-like	-1.46053	0.914666	12.3033	0.0010458	0.045934
ENSMUSG00000010025	ENSMUSG00000010025	11671	Aldh3a2	aldehyde dehydrogenase family 3, subfamily A2	-0.724095	8.21852	12.4005	0.00105455	0.0460577
ENSMUSG00000024391	ENSMUSG00000024391	55938	Apom	apolipoprotein M	0.715571	7.1256	12.4023	0.00105746	0.0460577
ENSMUSG00000041328	ENSMUSG00000041328	74737	Pcf11	PCF11 cleavage and polyadenylation factor subunit	0.479606	4.83242	12.2589	0.00106546	0.0460577
ENSMUSG00000030872	ENSMUSG00000030872	74105	Gga2	golgi associated, gamma adaptin ear containing, ARF binding protein 2	-0.599585	3.67984	12.2583	0.00106574	0.0460577
ENSMUSG00000036620	ENSMUSG00000036620	103534	Mgat4b	mannoside acetylglucosaminyltransferase 4, isoenzyme B	-0.46332	5.13363	12.2431	0.00107254	0.0461198
ENSMUSG00000025503	ENSMUSG00000025503	21351	Taldo1	transaldolase 1	-0.321036	7.17694	12.236	0.00107574	0.0461198
ENSMUSG00000062410	ENSMUSG00000062410	15494	Hsd3b3	hydroxy-delta-5-steroid dehydrogenase, 3 beta- and steroid delta-isomerase 3	0.611416	7.65401	12.2501	0.00108141	0.0461789
ENSMUSG00000027947	ENSMUSG00000027947	16194	Il6ra	interleukin 6 receptor, alpha	0.726838	5.11382	12.2838	0.00108735	0.0462491
ENSMUSG00000006522	ENSMUSG00000006522	16426	Itih3	inter-alpha trypsin inhibitor, heavy chain 3	0.569061	8.32941	12.1595	0.00111084	0.0470619
ENSMUSG00000033863	ENSMUSG00000033863	16601	Klf9	Kruppel-like factor 9	0.457879	8.79746	12.1169	0.00113092	0.0477225
ENSMUSG00000017774	ENSMUSG00000017774	17913	Myo1c	myosin IC	-0.627021	4.11059	12.1077	0.0011353	0.0477225
ENSMUSG00000062545	ENSMUSG00000062545	384059	Tlr12	toll-like receptor 12	-0.820304	4.72129	12.1991	0.00114033	0.0477476
ENSMUSG00000078515	ENSMUSG00000078515	68817	Ddi2	DNA-damage inducible protein 2	0.33357	7.45621	12.0809	0.00114819	0.0478903
ENSMUSG00000036427	ENSMUSG00000036427	14751	Gpi1	glucose phosphate isomerase 1	-0.496767	6.41667	12.0443	0.00116599	0.0484449
ENSMUSG00000030340	ENSMUSG00000030340	20276	Scnn1a	sodium channel, nonvoltage-gated 1 alpha	1.16965	3.2706	12.15	0.00118298	0.0488806
ENSMUSG00000031700	ENSMUSG00000031700	108682	Gpt2	glutamic pyruvate transaminase (alanine aminotransferase) 2	-0.489498	8.30138	12.0049	0.00118556	0.0488806
ENSMUSG00000026956	ENSMUSG00000026956	227620	Uap1l1	UDP-N-acteylglucosamine pyrophosphorylase 1-like 1	-1.56735	3.13094	12.2441	0.00119914	0.0492252
ENSMUSG00000024642	ENSMUSG00000024642	21888	Tle4	transducin-like enhancer of split 4	0.565865	3.74319	11.9701	0.00120307	0.0492252
ENSMUSG00000021264	ENSMUSG00000021264	22632	Yy1	YY1 transcription factor	0.287124	5.88939	11.8982	0.00124014	0.05055
ENSMUSG00000038224	ENSMUSG00000038224	18816	Serpinf2	serine (or cysteine) peptidase inhibitor, clade F, member 2	0.512808	8.85117	11.8373	0.00127251	0.0516734
ENSMUSG00000060224	ENSMUSG00000060224	74580	Pyroxd2	pyridine nucleotide-disulphide oxidoreductase domain 2	-0.704065	3.86257	11.8008	0.00129235	0.0521241
ENSMUSG00000021770	ENSMUSG00000021770	67630	Samd8	sterile alpha motif domain containing 8	0.447196	5.32133	11.7991	0.00129329	0.0521241
ENSMUSG00000032849	ENSMUSG00000032849	239273	Abcc4	ATP-binding cassette, sub-family C (CFTR/MRP), member 4	-1.51161	1.26409	11.7891	0.00129879	0.0521503
ENSMUSG00000020099	ENSMUSG00000020099	107449	Unc5b	unc-5 netrin receptor B	-1.14364	3.53975	11.8946	0.00132924	0.0531744
ENSMUSG00000022364	ENSMUSG00000022364	210544	Tbc1d31	TBC1 domain family, member 31	-0.778902	2.69355	11.7107	0.00134267	0.053513
ENSMUSG00000039745	ENSMUSG00000039745	53415	Htatip2	HIV-1 Tat interactive protein 2	-0.511315	4.79458	11.6977	0.00135013	0.0536115
ENSMUSG00000116284	ENSMUSG00000116284	102639762	LOC102639762	thymosin beta-10	1.35378	2.96807	11.8297	0.00137324	0.0543287
ENSMUSG00000029439	ENSMUSG00000029439	231769	Sfswap	splicing factor SWAP	0.368751	5.63241	11.6399	0.00138367	0.0544777
ENSMUSG00000071054	ENSMUSG00000071054	224903	Safb	scaffold attachment factor B	0.465609	5.05415	11.6292	0.00138999	0.0544777
ENSMUSG00000040997	ENSMUSG00000040997	105501	Abhd4	abhydrolase domain containing 4	-0.550467	5.19005	11.6255	0.00139219	0.0544777
ENSMUSG00000055782	ENSMUSG00000055782	26874	Abcd2	ATP-binding cassette, sub-family D (ALD), member 2	-0.575938	4.65573	11.5852	0.00141627	0.0552191
ENSMUSG00000038515	ENSMUSG00000038515	66790	Grtp1	GH regulated TBC protein 1	0.583871	4.38434	11.5694	0.00142585	0.0552501
ENSMUSG00000074183	ENSMUSG00000074183	14857	Gsta1	glutathione S-transferase, alpha 1 (Ya)	-2.09652	5.09063	11.9453	0.00142733	0.0552501
ENSMUSG00000046794	ENSMUSG00000046794	244416	Ppp1r3b	protein phosphatase 1, regulatory subunit 3B	0.652559	5.51644	11.5734	0.0014498	0.0558621
ENSMUSG00000032479	ENSMUSG00000032479	17758	Map4	microtubule-associated protein 4	-0.493258	4.1713	11.5187	0.00145696	0.0558621
ENSMUSG00000032806	ENSMUSG00000032806	214601	Slc10a3	solute carrier family 10 (sodium/bile acid cotransporter family), member 3	-0.775846	2.51306	11.5159	0.00145872	0.0558621
ENSMUSG00000075044	ENSMUSG00000075044	236293	Slc22a29	solute carrier family 22. member 29	-1.44696	1.90243	11.5038	0.00146623	0.0559508
ENSMUSG00000056121	ENSMUSG00000056121	225020	Fez2	fasciculation and elongation protein zeta 2 (zygin II)	-0.464495	4.56393	11.493	0.00147302	0.0560113
ENSMUSG00000050069	ENSMUSG00000050069	23893	Grem2	gremlin 2, DAN family BMP antagonist	1.21548	1.56088	11.4212	0.00151888	0.0574501
ENSMUSG00000026628	ENSMUSG00000026628	11910	Atf3	activating transcription factor 3	-1.55387	1.62975	11.4171	0.00152154	0.0574501
ENSMUSG00000041272	ENSMUSG00000041272	252838	Tox	thymocyte selection-associated high mobility group box	-0.687518	3.75501	11.4077	0.00152766	0.0574797
ENSMUSG00000041012	ENSMUSG00000041012	70031	Cmtm8	CKLF-like MARVEL transmembrane domain containing 8	0.364338	7.33797	11.3611	0.00155846	0.058434
ENSMUSG00000026849	ENSMUSG00000026849	30931	Tor1a	torsin family 1, member A (torsin A)	-0.549076	5.04158	11.3411	0.00157182	0.0585271
ENSMUSG00000031521	ENSMUSG00000031521	11593	Aga	aspartylglucosaminidase	-0.562335	4.94576	11.3269	0.0015814	0.0585271
ENSMUSG00000037606	ENSMUSG00000037606	79196	Osbpl5	oxysterol binding protein-like 5	-1.39373	1.83235	11.3187	0.00158699	0.0585271
ENSMUSG00000031627	ENSMUSG00000031627	16363	Irf2	interferon regulatory factor 2	0.412769	6.15499	11.3089	0.00159366	0.0585271
ENSMUSG00000109764	ENSMUSG00000109764	16621	Klkb1	kallikrein B, plasma 1	0.463053	7.97716	11.3021	0.0015983	0.0585271
ENSMUSG00000046959	ENSMUSG00000046959	231583	Slc26a1	solute carrier family 26 (sulfate transporter), member 1	0.449766	7.35494	11.3016	0.00159865	0.0585271
ENSMUSG00000034724	ENSMUSG00000034724	231464	Cnot6l	CCR4-NOT transcription complex, subunit 6-like	0.35309	6.01169	11.2957	0.00160267	0.0585271
ENSMUSG00000001632	ENSMUSG00000001632	78783	Brpf1	bromodomain and PHD finger containing, 1	0.515428	3.36079	11.2932	0.00160445	0.0585271
ENSMUSG00000006800	ENSMUSG00000006800	72043	Sulf2	sulfatase 2	-0.619603	4.31149	11.2817	0.00161233	0.058616
ENSMUSG00000034083	ENSMUSG00000034083	232236	Ccdc174	coiled-coil domain containing 174	0.542092	3.58208	11.2421	0.00163994	0.0592824
ENSMUSG00000039831	ENSMUSG00000039831	214137	Arhgap29	Rho GTPase activating protein 29	0.517511	5.69882	11.2106	0.00166229	0.0592824
ENSMUSG00000035836	ENSMUSG00000035836	71773	Ugt2b1	UDP glucuronosyltransferase 2 family, polypeptide B1	0.593156	8.06545	11.2361	0.0016627	0.0592824
ENSMUSG00000042978	ENSMUSG00000042978	104175	Sbk1	SH3-binding kinase 1	-0.649498	3.85687	11.2095	0.0016631	0.0592824
ENSMUSG00000019370	ENSMUSG00000019370	12315	Calm3	calmodulin 3	-0.450411	5.47679	11.2091	0.00166339	0.0592824
ENSMUSG00000001911	ENSMUSG00000001911	18032	Nfix	nuclear factor I/X	0.51257	7.17426	11.2064	0.00166533	0.0592824
ENSMUSG00000030861	ENSMUSG00000030861	66885	Acadsb	acyl-Coenzyme A dehydrogenase, short/branched chain	0.464241	6.60266	11.2009	0.00166923	0.0592824
ENSMUSG00000061175	ENSMUSG00000061175	329679	Fnip2	folliculin interacting protein 2	-0.58192	4.36285	11.1924	0.00167536	0.0593046
ENSMUSG00000025504	ENSMUSG00000025504	98845	Eps8l2	EPS8-like 2	0.561867	5.68553	11.1816	0.00168312	0.0593836
ENSMUSG00000056673	ENSMUSG00000056673	20592	Kdm5d	lysine (K)-specific demethylase 5D	0.633349	3.12366	11.1548	0.00170265	0.0598764
ENSMUSG00000029810	ENSMUSG00000029810	65963	Tmem176b	transmembrane protein 176B	-0.52502	7.8355	11.1359	0.00171654	0.0601685
ENSMUSG00000045636	ENSMUSG00000045636	102103	Mtus1	mitochondrial tumor suppressor 1	0.315649	6.5646	11.0789	0.0017592	0.0612967
ENSMUSG00000063558	ENSMUSG00000063558	11761	Aox1	aldehyde oxidase 1	-0.476395	5.73217	11.0699	0.00176605	0.0612967
ENSMUSG00000055675	ENSMUSG00000055675	74901	Kbtbd11	kelch repeat and BTB (POZ) domain containing 11	-1.15149	1.61848	11.0625	0.00177163	0.0612967
ENSMUSG00000039428	ENSMUSG00000039428	72759	Tmem135	transmembrane protein 135	-0.362346	6.04384	11.0494	0.00178166	0.0612967
ENSMUSG00000020190	ENSMUSG00000020190	17347	Mknk2	MAP kinase-interacting serine/threonine kinase 2	-0.515745	6.0015	11.0465	0.00178395	0.0612967
ENSMUSG00000029310	ENSMUSG00000029310	74167	Nudt9	nudix (nucleoside diphosphate linked moiety X)-type motif 9	-0.604802	4.80982	11.0435	0.00178625	0.0612967
ENSMUSG00000007036	ENSMUSG00000007036	193742	Abhd16a	abhydrolase domain containing 16A	-0.503276	5.2236	11.0404	0.0017886	0.0612967
ENSMUSG00000058022	ENSMUSG00000058022	109254	Adtrp	androgen dependent TFPI regulating protein	0.417244	6.91032	11.0278	0.00179833	0.0613949
ENSMUSG00000025991	ENSMUSG00000025991	227231	Cps1	carbamoyl-phosphate synthetase 1	0.748357	9.32949	11.1478	0.00180667	0.0613949
ENSMUSG00000038754	ENSMUSG00000038754	12686	Elovl3	elongation of very long chain fatty acids (FEN1/Elo2, SUR4/Elo3, yeast)-like 3	1.25229	6.55437	11.335	0.00181239	0.0613949
ENSMUSG00000003119	ENSMUSG00000003119	69131	Cdk12	cyclin-dependent kinase 12	0.467021	4.8962	11.0074	0.00181429	0.0613949
ENSMUSG00000037110	ENSMUSG00000037110	241694	Ralgapa2	Ral GTPase activating protein, alpha subunit 2 (catalytic)	0.39184	5.1215	10.9698	0.00184394	0.0620375
ENSMUSG00000004341	ENSMUSG00000004341	75512	Gpx6	glutathione peroxidase 6	1.57975	1.84466	11.0062	0.00184481	0.0620375
ENSMUSG00000079334	ENSMUSG00000079334	56441	Naa80	N(alpha)-acetyltransferase 80, NatH catalytic subunit	0.476586	4.97048	10.9535	0.00185697	0.0622518
ENSMUSG00000022951	ENSMUSG00000022951	54720	Rcan1	regulator of calcineurin 1	-0.709232	4.09484	10.9364	0.00187073	0.0625184
ENSMUSG00000017781	ENSMUSG00000017781	18738	Pitpna	phosphatidylinositol transfer protein, alpha	-0.363045	5.20047	10.9285	0.00187717	0.0625393
ENSMUSG00000026939	ENSMUSG00000026939	51875	Tmem141	transmembrane protein 141	-0.620142	3.79501	10.9083	0.00189366	0.0628941
ENSMUSG00000021366	ENSMUSG00000021366	110521	Hivep1	human immunodeficiency virus type I enhancer binding protein 1	0.560123	3.48027	10.8721	0.00192355	0.0635265
ENSMUSG00000015968	ENSMUSG00000015968	12289	Cacna1d	calcium channel, voltage-dependent, L type, alpha 1D subunit	1.32426	1.57017	10.8709	0.00192451	0.0635265
ENSMUSG00000027293	ENSMUSG00000027293	98878	Ehd4	EH-domain containing 4	-0.721016	3.81527	10.8637	0.00193057	0.0635317
ENSMUSG00000021556	ENSMUSG00000021556	105348	Golm1	golgi membrane protein 1	-1.45036	1.50215	10.8485	0.00194329	0.063713
ENSMUSG00000030342	ENSMUSG00000030342	12527	Cd9	CD9 antigen	-1.40693	3.34939	11.0581	0.00195109	0.063713
ENSMUSG00000004798	ENSMUSG00000004798	29869	Ulk2	unc-51 like kinase 2	0.43271	5.36786	10.836	0.00195384	0.063713
ENSMUSG00000058672	ENSMUSG00000058672	22151	Tubb2a	tubulin, beta 2A class IIA	-1.5099	6.59916	11.1472	0.00197301	0.0641437
ENSMUSG00000051483	ENSMUSG00000051483	12408	Cbr1	carbonyl reductase 1	-0.552351	5.9483	10.7756	0.00200571	0.0650105
ENSMUSG00000005373	ENSMUSG00000005373	58805	Mlxipl	MLX interacting protein-like	0.445823	6.42643	10.7535	0.00202505	0.0654402
ENSMUSG00000039361	ENSMUSG00000039361	233489	Picalm	phosphatidylinositol binding clathrin assembly protein	-0.363295	6.262	10.7417	0.0020354	0.0654692
ENSMUSG00000017929	ENSMUSG00000017929	56336	B4galt5	UDP-Gal:betaGlcNAc beta 1,4-galactosyltransferase, polypeptide 5	-0.78301	4.12677	10.7659	0.00205367	0.0654692
ENSMUSG00000032548	ENSMUSG00000032548	24059	Slco2a1	solute carrier organic anion transporter family, member 2a1	0.601773	4.54319	10.7126	0.00206132	0.0654692
ENSMUSG00000001313	ENSMUSG00000001313	11858	Rnd2	Rho family GTPase 2	-0.633197	3.59031	10.7081	0.00206535	0.0654692
ENSMUSG00000029201	ENSMUSG00000029201	22235	Ugdh	UDP-glucose dehydrogenase	-0.733908	6.71765	10.8445	0.00206815	0.0654692
ENSMUSG00000031799	ENSMUSG00000031799	326618	Tpm4	tropomyosin 4	-0.678358	4.91479	10.738	0.00207045	0.0654692
ENSMUSG00000025812	ENSMUSG00000025812	93742	Pard3	par-3 family cell polarity regulator	0.331884	6.29442	10.6974	0.00207501	0.0654692
ENSMUSG00000051439	ENSMUSG00000051439	12475	Cd14	CD14 antigen	-1.63211	1.94288	10.7489	0.00207624	0.0654692
ENSMUSG00000027359	ENSMUSG00000027359	26458	Slc27a2	solute carrier family 27 (fatty acid transporter), member 2	0.421586	8.93429	10.6911	0.0020807	0.0654692
ENSMUSG00000034163	ENSMUSG00000034163	216345	Zfc3h1	zinc finger, C3H1-type containing	0.451056	4.89761	10.6468	0.00212117	0.0665477
ENSMUSG00000021947	ENSMUSG00000021947	68631	Cryl1	crystallin, lambda 1	-0.508845	3.9442	10.6178	0.00214809	0.0671966
ENSMUSG00000056131	ENSMUSG00000056131	109785	Pgm3	phosphoglucomutase 3	-0.683197	3.58304	10.6098	0.00215559	0.0672347
ENSMUSG00000067924	ENSMUSG00000067924	553127	Rtl8b	retrotransposon Gag like 8B	-0.597828	4.37347	10.6001	0.0021648	0.0672347
ENSMUSG00000041297	ENSMUSG00000041297	69562	Cdk13	cyclin-dependent kinase 13	0.488223	4.46113	10.5966	0.00216805	0.0672347
ENSMUSG00000028034	ENSMUSG00000028034	51886	Fubp1	far upstream element (FUSE) binding protein 1	0.43024	5.59688	10.5628	0.0022003	0.0679896
ENSMUSG00000025405	ENSMUSG00000025405	16325	Inhbc	inhibin beta-C	0.507761	4.88027	10.5578	0.00220503	0.0679896
ENSMUSG00000035186	ENSMUSG00000035186	24108	Ubd	ubiquitin D	-2.51457	2.9902	10.8561	0.00221755	0.0681801
ENSMUSG00000029833	ENSMUSG00000029833	21848	Trim24	tripartite motif-containing 24	-0.517235	4.26547	10.5298	0.00223218	0.0684344
ENSMUSG00000037533	ENSMUSG00000037533	192786	Rapgef6	Rap guanine nucleotide exchange factor (GEF) 6	0.571047	4.22705	10.4749	0.0022863	0.0698944
ENSMUSG00000011960	ENSMUSG00000011960	12455	Ccnt1	cyclin T1	0.400236	5.15482	10.451	0.00231035	0.0704298
ENSMUSG00000028001	ENSMUSG00000028001	14161	Fga	fibrinogen alpha chain	0.403443	10.6581	10.4396	0.00232191	0.0705107
ENSMUSG00000056529	ENSMUSG00000056529	19204	Ptafr	platelet-activating factor receptor	-1.21524	1.00795	10.4355	0.00232611	0.0705107
ENSMUSG00000041444	ENSMUSG00000041444	330914	Arhgap32	Rho GTPase activating protein 32	0.70263	2.80656	10.4179	0.00234403	0.0708543
ENSMUSG00000051043	ENSMUSG00000051043	70355	Gprc5c	G protein-coupled receptor, family C, group 5, member C	0.546271	4.93753	10.3958	0.00236688	0.0713445
ENSMUSG00000029314	ENSMUSG00000029314	231510	Gpat3	glycerol-3-phosphate acyltransferase 3	-0.979589	2.8656	10.353	0.00241165	0.0724911
ENSMUSG00000037351	ENSMUSG00000037351	226977	Actr1b	ARP1 actin-related protein 1B, centractin beta	-0.310843	5.46381	10.3442	0.00242101	0.0725697
ENSMUSG00000035875	ENSMUSG00000035875	98870	AI182371	expressed sequence AI182371	0.599423	7.33919	10.3811	0.00243708	0.0728484
ENSMUSG00000050335	ENSMUSG00000050335	16854	Lgals3	lectin, galactose binding, soluble 3	-1.46413	4.15392	10.5787	0.00246222	0.0729246
ENSMUSG00000056888	ENSMUSG00000056888	73690	Glipr1	GLI pathogenesis-related 1 (glioma)	-1.67788	1.13546	10.3014	0.00246692	0.0729246
ENSMUSG00000049555	ENSMUSG00000049555	20776	Tmie	transmembrane inner ear	0.782408	5.75491	10.4498	0.00246765	0.0729246
ENSMUSG00000033880	ENSMUSG00000033880	19039	Lgals3bp	lectin, galactoside-binding, soluble, 3 binding protein	-0.469629	6.35384	10.2843	0.00248547	0.0729246
ENSMUSG00000041258	ENSMUSG00000041258	329002	Zfp236	zinc finger protein 236	0.630271	2.83078	10.2842	0.00248553	0.0729246
ENSMUSG00000042010	ENSMUSG00000042010	100705	Acacb	acetyl-Coenzyme A carboxylase beta	-1.06175	5.37678	10.5243	0.00248616	0.0729246
ENSMUSG00000027086	ENSMUSG00000027086	320720	Fastkd1	FAST kinase domains 1	0.561695	3.82357	10.2828	0.00248707	0.0729246
ENSMUSG00000029621	ENSMUSG00000029621	56443	Arpc1a	actin related protein 2/3 complex, subunit 1A	-0.645463	5.37153	10.3182	0.0024988	0.0730696
ENSMUSG00000028088	ENSMUSG00000028088	14263	Fmo5	flavin containing monooxygenase 5	-0.425934	8.62374	10.2602	0.00251189	0.0732532
ENSMUSG00000025326	ENSMUSG00000025326	22215	Ube3a	ubiquitin protein ligase E3A	0.293892	6.69816	10.2418	0.00253231	0.0736383
ENSMUSG00000057103	ENSMUSG00000057103	66116	Nat8f1	N-acetyltransferase 8 (GCN5-related) family member 1	0.627018	7.48985	10.3068	0.00253878	0.0736383
ENSMUSG00000074634	ENSMUSG00000074634	633640	Tmem267	transmembrane protein 267	-0.823475	2.8495	10.2218	0.00255473	0.0739016
ENSMUSG00000041351	ENSMUSG00000041351	110351	Rap1gap	Rap1 GTPase-activating protein	-1.18886	1.66028	10.2021	0.00257693	0.074344
ENSMUSG00000006498	ENSMUSG00000006498	19205	Ptbp1	polypyrimidine tract binding protein 1	0.345114	5.08971	10.1633	0.00262137	0.0752238
ENSMUSG00000029581	ENSMUSG00000029581	14086	Fscn1	fascin actin-bundling protein 1	-0.860898	2.93669	10.1632	0.0026214	0.0752238
ENSMUSG00000050423	ENSMUSG00000050423	76487	Ppp1r3g	protein phosphatase 1, regulatory subunit 3G	-2.03113	1.27059	10.2008	0.00263353	0.0753708
ENSMUSG00000027984	ENSMUSG00000027984	15107	Hadh	hydroxyacyl-Coenzyme A dehydrogenase	-0.447283	9.06446	10.1407	0.00264759	0.0755721
ENSMUSG00000075543	ENSMUSG00000075543	231903	Urad	ureidoimidazoline (2-oxo-4-hydroxy-4-carboxy-5) decarboxylase	1.14221	2.66037	10.1525	0.00268556	0.0763611
ENSMUSG00000031271	ENSMUSG00000031271	331535	Serpina7	serine (or cysteine) peptidase inhibitor, clade A (alpha-1 antiproteinase, antitrypsin), member 7	-0.91121	5.36931	10.2992	0.00268942	0.0763611
ENSMUSG00000037795	ENSMUSG00000037795	333789	N4bp2	NEDD4 binding protein 2	0.523843	4.63686	10.0771	0.00272295	0.076945
ENSMUSG00000027496	ENSMUSG00000027496	20878	Aurka	aurora kinase A	-1.82391	0.770487	10.0759	0.00272429	0.076945
ENSMUSG00000026417	ENSMUSG00000026417	18703	Pigr	polymeric immunoglobulin receptor	0.544529	9.11772	10.0681	0.00273369	0.0770085
ENSMUSG00000025220	ENSMUSG00000025220	76055	Oga	O-GlcNAcase	0.319504	5.82372	10.0301	0.00278005	0.0779311
ENSMUSG00000041220	ENSMUSG00000041220	170439	Elovl6	ELOVL family member 6, elongation of long chain fatty acids (yeast)	-0.752973	6.0103	10.163	0.00278423	0.0779311
ENSMUSG00000002944	ENSMUSG00000002944	12491	Cd36	CD36 molecule	-0.720739	6.45698	10.1288	0.00281293	0.0779311
ENSMUSG00000095595	ENSMUSG00000095595	73385	Fam177a	family with sequence similarity 177, member A	-0.708019	2.51732	10.0029	0.00281364	0.0779311
ENSMUSG00000034341	ENSMUSG00000034341	22378	Wbp2	WW domain binding protein 2	-0.271558	6.66169	10.0025	0.00281415	0.0779311
ENSMUSG00000035578	ENSMUSG00000035578	69707	Iqcg	IQ motif containing G	-1.32174	1.32817	9.9994	0.002818	0.0779311
ENSMUSG00000026034	ENSMUSG00000026034	12747	Clk1	CDC-like kinase 1	0.342663	5.66072	9.99471	0.00282386	0.0779311
ENSMUSG00000035161	ENSMUSG00000035161	18130	Ints6	integrator complex subunit 6	0.459434	4.41734	9.99331	0.00282561	0.0779311
ENSMUSG00000045211	ENSMUSG00000045211	213484	Nudt18	nudix (nucleoside diphosphate linked moiety X)-type motif 18	-0.84973	3.46964	10.0069	0.00283162	0.0779311
ENSMUSG00000009905	ENSMUSG00000009905	70750	Kdsr	3-ketodihydrosphingosine reductase	-0.493174	5.70488	9.95443	0.00287465	0.0789135
ENSMUSG00000019731	ENSMUSG00000019731	270066	Slc35e1	solute carrier family 35, member E1	0.389048	3.85401	9.94571	0.00288577	0.0790173
ENSMUSG00000107283	ENSMUSG00000107283	17527	Mpv17	MpV17 mitochondrial inner membrane protein	-0.667704	3.73178	9.93266	0.00290251	0.0792738
ENSMUSG00000024304	ENSMUSG00000024304	12558	Cdh2	cadherin 2	0.327394	6.51645	9.91935	0.00291968	0.079541
ENSMUSG00000027248	ENSMUSG00000027248	14827	Pdia3	protein disulfide isomerase associated 3	0.47598	7.83207	9.89325	0.00295366	0.0802634
ENSMUSG00000016756	ENSMUSG00000016756	12763	Cmah	cytidine monophospho-N-acetylneuraminic acid hydroxylase	0.450184	5.93052	9.87902	0.00297236	0.0805682
ENSMUSG00000066026	ENSMUSG00000066026	20148	Dhrs3	dehydrogenase/reductase (SDR family) member 3	0.46009	6.84109	9.85839	0.0029997	0.0810642
ENSMUSG00000045409	ENSMUSG00000045409	79263	Trim39	tripartite motif-containing 39	0.608645	2.79954	9.85387	0.00300572	0.0810642
ENSMUSG00000029106	ENSMUSG00000029106	11518	Add1	adducin 1 (alpha)	-0.396603	4.91514	9.83968	0.00302472	0.0813726
ENSMUSG00000025316	ENSMUSG00000025316	53325	Banp	BTG3 associated nuclear protein	0.453731	4.12434	9.80424	0.00307272	0.0824577
ENSMUSG00000029163	ENSMUSG00000029163	100952	Emilin1	elastin microfibril interfacer 1	-0.696557	3.27047	9.79503	0.00308533	0.08259
ENSMUSG00000031444	ENSMUSG00000031444	14058	F10	coagulation factor X	0.490097	7.81961	9.78275	0.00310222	0.0827175
ENSMUSG00000025510	ENSMUSG00000025510	12476	Cd151	CD151 antigen	-0.407947	5.45655	9.77867	0.00310787	0.0827175
ENSMUSG00000031827	ENSMUSG00000031827	72042	Cotl1	coactosin-like 1 (Dictyostelium)	-0.637964	4.43515	9.77485	0.00311315	0.0827175
ENSMUSG00000025534	ENSMUSG00000025534	110006	Gusb	glucuronidase, beta	-0.549027	3.87847	9.74902	0.00314914	0.0833857
ENSMUSG00000024197	ENSMUSG00000024197	66905	Plin3	perilipin 3	-0.50932	6.49366	9.7457	0.00315379	0.0833857
ENSMUSG00000030513	ENSMUSG00000030513	18553	Pcsk6	proprotein convertase subtilisin/kexin type 6	-0.446271	6.96587	9.73497	0.0031689	0.0835114
ENSMUSG00000005320	ENSMUSG00000005320	14186	Fgfr4	fibroblast growth factor receptor 4	0.567236	3.43793	9.72103	0.00318863	0.0835114
ENSMUSG00000026822	ENSMUSG00000026822	16819	Lcn2	lipocalin 2	-1.59553	3.70529	9.96813	0.00318956	0.0835114
ENSMUSG00000062753	ENSMUSG00000062753	106672	AI413582	expressed sequence AI413582	-0.683293	3.09268	9.71218	0.00320122	0.0835114
ENSMUSG00000004100	ENSMUSG00000004100	235036	Ppan	peter pan homolog	0.665545	3.1945	9.70732	0.00320816	0.0835114
ENSMUSG00000078817	ENSMUSG00000078817	378425	Nlrp12	NLR family, pyrin domain containing 12	0.506669	5.42818	9.70527	0.0032111	0.0835114
ENSMUSG00000042712	ENSMUSG00000042712	22381	Tceal9	transcription elongation factor A like 9	-0.453242	5.76012	9.70145	0.00321656	0.0835114
ENSMUSG00000022905	ENSMUSG00000022905	16646	Kpna1	karyopherin (importin) alpha 1	0.381992	4.91733	9.69862	0.00322063	0.0835114
ENSMUSG00000022875	ENSMUSG00000022875	16644	Kng1	kininogen 1	0.421628	10.4554	9.68321	0.00324283	0.0838048
ENSMUSG00000029388	ENSMUSG00000029388	209354	Eif2b1	eukaryotic translation initiation factor 2B, subunit 1 (alpha)	-0.544739	3.66172	9.67997	0.00324752	0.0838048
ENSMUSG00000002983	ENSMUSG00000002983	19698	Relb	avian reticuloendotheliosis viral (v-rel) oncogene related B	-1.3908	1.57716	9.65181	0.00328857	0.0840891
ENSMUSG00000086040	ENSMUSG00000086040	330319	Wipf3	WAS/WASL interacting protein family, member 3	-0.439172	5.5679	9.65006	0.00329115	0.0840891
ENSMUSG00000038745	ENSMUSG00000038745	101613	Nlrp6	NLR family, pyrin domain containing 6	0.392824	6.4153	9.6383	0.00330845	0.0840891
ENSMUSG00000045319	ENSMUSG00000045319	227545	Proser2	proline and serine rich 2	0.57841	3.4502	9.63403	0.00331477	0.0840891
ENSMUSG00000051375	ENSMUSG00000051375	75599	Pcdh1	protocadherin 1	0.462386	4.82279	9.63174	0.00331816	0.0840891
ENSMUSG00000028766	ENSMUSG00000028766	11647	Alpl	alkaline phosphatase, liver/bone/kidney	-0.63366	3.68466	9.6286	0.00332282	0.0840891
ENSMUSG00000057236	ENSMUSG00000057236	19646	Rbbp4	retinoblastoma binding protein 4, chromatin remodeling factor	0.354776	6.28029	9.62685	0.00332541	0.0840891
ENSMUSG00000030088	ENSMUSG00000030088	107747	Aldh1l1	aldehyde dehydrogenase 1 family, member L1	0.403657	8.17367	9.62469	0.00332863	0.0840891
ENSMUSG00000068011	ENSMUSG00000068011	70291	Mkrn2os	makorin, ring finger protein 2, opposite strand	-0.579353	4.8228	9.62452	0.00332887	0.0840891
ENSMUSG00000078674	ENSMUSG00000078674	100048884	Mup18	major urinary protein 18	1.26932	11.6399	9.8433	0.00336815	0.0846527
ENSMUSG00000066595	ENSMUSG00000066595	226844	Flvcr1	feline leukemia virus subgroup C cellular receptor 1	-0.90315	2.05198	9.59569	0.00337202	0.0846527
ENSMUSG00000014599	ENSMUSG00000014599	12977	Csf1	colony stimulating factor 1 (macrophage)	-1.06625	3.20626	9.67908	0.00337478	0.0846527
ENSMUSG00000025197	ENSMUSG00000025197	226143	Cyp2c23	cytochrome P450, family 2, subfamily c, polypeptide 23	0.711071	8.00183	9.69631	0.00340545	0.0852072
ENSMUSG00000063954	ENSMUSG00000063954	319192	Hist2h2aa2	histone cluster 2, H2aa2	0.416686	6.50825	9.56885	0.00341272	0.0852072
ENSMUSG00000021868	ENSMUSG00000021868	105675	Ppif	peptidylprolyl isomerase F (cyclophilin F)	-0.600036	4.79051	9.55773	0.00342975	0.0853539
ENSMUSG00000027901	ENSMUSG00000027901	72121	Dennd2d	DENN/MADD domain containing 2D	-0.475247	3.4378	9.55466	0.00343446	0.0853539
ENSMUSG00000022149	ENSMUSG00000022149	12279	C9	complement component 9	0.451065	8.4125	9.53993	0.00345718	0.0857205
ENSMUSG00000027261	ENSMUSG00000027261	15112	Hao1	hydroxyacid oxidase 1, liver	0.361581	7.42438	9.53241	0.00346882	0.0857599
ENSMUSG00000074170	ENSMUSG00000074170	72287	Plekhf1	pleckstrin homology domain containing, family F (with FYVE domain) member 1	0.58246	3.52335	9.52347	0.00348274	0.0857599
ENSMUSG00000115388	ENSMUSG00000115388	223650	Eppk1	epiplakin 1	-0.586075	3.84742	9.52342	0.00348281	0.0857599
ENSMUSG00000052392	ENSMUSG00000052392	171282	Acot4	acyl-CoA thioesterase 4	-0.760206	6.21235	9.65978	0.00349065	0.0857599
ENSMUSG00000038658	ENSMUSG00000038658	226089	Ric1	RAB6A GEF complex partner 1	0.501858	3.56121	9.47128	0.00356513	0.0873685
ENSMUSG00000032966	ENSMUSG00000032966	14225	Fkbp1a	FK506 binding protein 1a	-0.53572	6.30989	9.4701	0.00358375	0.0873685
ENSMUSG00000000628	ENSMUSG00000000628	15277	Hk2	hexokinase 2	-1.36439	2.37265	9.53377	0.00358501	0.0873685
ENSMUSG00000042305	ENSMUSG00000042305	57439	Tmem183a	transmembrane protein 183A	0.308837	6.51104	9.45262	0.00359509	0.0873685
ENSMUSG00000028199	ENSMUSG00000028199	12972	Cryz	crystallin, zeta	-0.382436	6.43528	9.44613	0.00360556	0.0873685
ENSMUSG00000038615	ENSMUSG00000038615	18023	Nfe2l1	nuclear factor, erythroid derived 2,-like 1	-0.310854	5.98758	9.4455	0.00360659	0.0873685
ENSMUSG00000025810	ENSMUSG00000025810	18186	Nrp1	neuropilin 1	0.425052	6.45972	9.43274	0.00362729	0.0873685
ENSMUSG00000055320	ENSMUSG00000055320	21676	Tead1	TEA domain family member 1	-0.626673	3.43927	9.42537	0.00363932	0.0873685
ENSMUSG00000024298	ENSMUSG00000024298	208292	Zfp871	zinc finger protein 871	0.408021	6.52275	9.4252	0.00363959	0.0873685
ENSMUSG00000074768	ENSMUSG00000074768	12116	Bhmt	betaine-homocysteine methyltransferase	0.407875	11.4081	9.42329	0.00364272	0.0873685
ENSMUSG00000023456	ENSMUSG00000023456	21991	Tpi1	triosephosphate isomerase 1	-0.347247	6.9963	9.42163	0.00364543	0.0873685
ENSMUSG00000024151	ENSMUSG00000024151	17685	Msh2	mutS homolog 2	0.487417	3.30868	9.39123	0.00369553	0.0880874
ENSMUSG00000037025	ENSMUSG00000037025	15376	Foxa2	forkhead box A2	0.561722	5.75908	9.40851	0.00369772	0.0880874
ENSMUSG00000022180	ENSMUSG00000022180	50934	Slc7a8	solute carrier family 7 (cationic amino acid transporter, y+ system), member 8	-1.09981	1.94514	9.38856	0.00369998	0.0880874
ENSMUSG00000001506	ENSMUSG00000001506	12842	Col1a1	collagen, type I, alpha 1	-1.91617	4.80691	9.63466	0.00371661	0.0882881
ENSMUSG00000028307	ENSMUSG00000028307	230163	Aldob	aldolase B, fructose-bisphosphate	-0.407937	11.6392	9.36422	0.00374068	0.0886639
ENSMUSG00000009035	ENSMUSG00000009035	223693	Tmem184b	transmembrane protein 184b	-0.439203	3.97621	9.33489	0.00379034	0.0896436
ENSMUSG00000016256	ENSMUSG00000016256	64138	Ctsz	cathepsin Z	-0.40944	6.82024	9.32073	0.00381457	0.0900134
ENSMUSG00000073411	ENSMUSG00000073411	14964	H2-D1	histocompatibility 2, D region locus 1	-0.475391	7.45944	9.316	0.00382271	0.0900134
ENSMUSG00000044465	ENSMUSG00000044465	74349	Fam160a2	family with sequence similarity 160, member A2	-0.441026	3.8822	9.30807	0.00383638	0.0901381
ENSMUSG00000040675	ENSMUSG00000040675	270685	Mthfd1l	methylenetetrahydrofolate dehydrogenase (NADP+ dependent) 1-like	-2.21319	0.978947	9.35311	0.00385097	0.0901804
ENSMUSG00000018974	ENSMUSG00000018974	53890	Sart3	squamous cell carcinoma antigen recognized by T cells 3	0.548966	3.44149	9.29735	0.00385494	0.0901804
ENSMUSG00000036339	ENSMUSG00000036339	218989	Tmem260	transmembrane protein 260	0.428918	4.22819	9.28742	0.00387221	0.0903881
ENSMUSG00000037416	ENSMUSG00000037416	240283	Dmxl1	Dmx-like 1	0.444793	3.80196	9.27605	0.00389211	0.0906557
ENSMUSG00000051730	ENSMUSG00000051730	75422	Mettl5	methyltransferase like 5	0.407806	3.78678	9.23606	0.00396292	0.0918051
ENSMUSG00000026883	ENSMUSG00000026883	69601	Dab2ip	disabled 2 interacting protein	-0.45588	4.30079	9.23503	0.00396477	0.0918051
ENSMUSG00000011831	ENSMUSG00000011831	14020	Evi5	ecotropic viral integration site 5	0.349441	7.05909	9.23375	0.00396705	0.0918051
ENSMUSG00000030591	ENSMUSG00000030591	57296	Psmd8	proteasome (prosome, macropain) 26S subunit, non-ATPase, 8	-0.470799	7.4071	9.22867	0.00397616	0.0918185
ENSMUSG00000004843	ENSMUSG00000004843	68942	Chmp2b	charged multivesicular body protein 2B	-0.358123	5.3819	9.20532	0.00401829	0.0925926
ENSMUSG00000024537	ENSMUSG00000024537	107047	Psmg2	proteasome (prosome, macropain) assembly chaperone 2	-0.451151	4.01751	9.19337	0.00404003	0.0928947
ENSMUSG00000028970	ENSMUSG00000028970	18669	Abcb1b	ATP-binding cassette, sub-family B (MDR/TAP), member 1B	-0.804049	1.82668	9.18263	0.00405966	0.0931471
ENSMUSG00000022763	ENSMUSG00000022763	72168	Aifm3	apoptosis-inducing factor, mitochondrion-associated 3	0.856149	1.73683	9.16556	0.0040911	0.0936688
ENSMUSG00000026202	ENSMUSG00000026202	22145	Tuba4a	tubulin, alpha 4A	0.479909	7.20783	9.16043	0.0041006	0.0936869
ENSMUSG00000004451	ENSMUSG00000004451	64143	Ralb	v-ral simian leukemia viral oncogene B	-0.71586	3.44251	9.15137	0.00411742	0.093872
ENSMUSG00000026240	ENSMUSG00000026240	26895	Cops7b	COP9 signalosome subunit 7B	0.518015	3.61516	9.10253	0.00420941	0.0957663
ENSMUSG00000032050	ENSMUSG00000032050	19684	Rdx	radixin	0.412475	8.28969	9.09248	0.00422862	0.0960004
ENSMUSG00000030095	ENSMUSG00000030095	74122	Tmem43	transmembrane protein 43	-1.00818	3.74775	9.19596	0.00425648	0.0963879
ENSMUSG00000028522	ENSMUSG00000028522	71148	Mier1	MEIR1 treanscription regulator	0.312634	5.60179	9.06615	0.00427934	0.0963879
ENSMUSG00000063232	ENSMUSG00000063232	380780	Serpina11	serine (or cysteine) peptidase inhibitor, clade A (alpha-1 antiproteinase, antitrypsin), member 11	0.467597	5.26525	9.0653	0.004281	0.0963879
ENSMUSG00000034621	ENSMUSG00000034621	237943	Gpatch8	G patch domain containing 8	0.365563	4.37154	9.06503	0.00428152	0.0963879
ENSMUSG00000040761	ENSMUSG00000040761	56381	Spen	spen family transcription repressor	0.403744	5.31671	9.04625	0.00431813	0.0970091
ENSMUSG00000026348	ENSMUSG00000026348	266645	Acmsd	amino carboxymuconate semialdehyde decarboxylase	1.12649	3.56621	9.18648	0.00432963	0.0970649
ENSMUSG00000037306	ENSMUSG00000037306	230815	Man1c1	mannosidase, alpha, class 1C, member 1	-0.889795	2.06381	9.03327	0.00434361	0.0971759
ENSMUSG00000031600	ENSMUSG00000031600	52348	Vps37a	vacuolar protein sorting 37A	0.343585	5.87934	9.02324	0.00436342	0.0972546
ENSMUSG00000061313	ENSMUSG00000061313	72108	Ddhd2	DDHD domain containing 2	-0.43519	4.8008	9.01915	0.00437154	0.0972546
ENSMUSG00000004035	ENSMUSG00000004035	68312	Gstm7	glutathione S-transferase, mu 7	0.413241	5.46059	9.01778	0.00437424	0.0972546
ENSMUSG00000029084	ENSMUSG00000029084	12494	Cd38	CD38 antigen	-0.831545	2.92756	9.00464	0.00440041	0.0974716
ENSMUSG00000031886	ENSMUSG00000031886	234673	Ces2e	carboxylesterase 2E	-0.313444	7.51772	8.99623	0.00441725	0.0974716
ENSMUSG00000067144	ENSMUSG00000067144	108114	Slc22a7	solute carrier family 22 (organic anion transporter), member 7	1.37036	2.47172	9.09782	0.00441878	0.0974716
ENSMUSG00000024454	ENSMUSG00000024454	15183	Hdac3	histone deacetylase 3	-0.513455	3.06124	8.99474	0.00442024	0.0974716
ENSMUSG00000056612	ENSMUSG00000056612	18938	Ppp1r14b	protein phosphatase 1, regulatory inhibitor subunit 14B	-0.380384	4.46697	8.98504	0.00443974	0.0977016
ENSMUSG00000047797	ENSMUSG00000047797	14618	Gjb1	gap junction protein, beta 1	0.483455	8.4671	8.97715	0.00445568	0.0978522
ENSMUSG00000043013	ENSMUSG00000043013	15379	Onecut1	one cut domain, family member 1	1.52738	3.1781	9.15899	0.00447686	0.0979313
ENSMUSG00000039218	ENSMUSG00000039218	75956	Srrm2	serine/arginine repetitive matrix 2	0.313381	8.2326	8.96641	0.00447748	0.0979313
ENSMUSG00000056917	ENSMUSG00000056917	20469	Sipa1	signal-induced proliferation associated gene 1	-0.646556	3.14707	8.95004	0.0045109	0.098462
ENSMUSG00000021338	ENSMUSG00000021338	68732	Carmil1	capping protein regulator and myosin 1 linker 1	0.84513	2.59452	8.93264	0.00454674	0.0990435
ENSMUSG00000041702	ENSMUSG00000041702	238386	Btbd7	BTB (POZ) domain containing 7	0.459649	4.20495	8.92803	0.00455628	0.0990507
ENSMUSG00000028551	ENSMUSG00000028551	12580	Cdkn2c	cyclin dependent kinase inhibitor 2C	-1.19712	1.52952	8.92267	0.00456741	0.0990925
ENSMUSG00000021431	ENSMUSG00000021431	67797	Snrnp48	small nuclear ribonucleoprotein 48 (U11/U12)	0.345885	5.70578	8.91368	0.00458612	0.0992983
ENSMUSG00000029238	ENSMUSG00000029238	12753	Clock	circadian locomotor output cycles kaput	0.46934	5.03427	8.90646	0.00460122	0.0993732
ENSMUSG00000022020	ENSMUSG00000022020	66897	Naa16	N(alpha)-acetyltransferase 16, NatA auxiliary subunit	0.501922	3.90135	8.9032	0.00460805	0.0993732
ENSMUSG00000038776	ENSMUSG00000038776	13849	Ephx1	epoxide hydrolase 1, microsomal	-0.479414	7.60782	8.87991	0.00465717	0.100145
ENSMUSG00000047126	ENSMUSG00000047126	67300	Cltc	clathrin, heavy polypeptide (Hc)	-0.279153	6.96795	8.87741	0.00466247	0.100145
ENSMUSG00000032624	ENSMUSG00000032624	78798	Eml4	echinoderm microtubule associated protein like 4	0.424141	3.92449	8.87232	0.0046733	0.100178
ENSMUSG00000027651	ENSMUSG00000027651	70470	Rprd1b	regulation of nuclear pre-mRNA domain containing 1B	0.409183	4.69199	8.86268	0.00469387	0.100291
ENSMUSG00000035401	ENSMUSG00000035401	233545	Emsy	EMSY, BRCA2-interacting transcriptional repressor	0.331432	4.5264	8.86112	0.00469721	0.100291
ENSMUSG00000049658	ENSMUSG00000049658	544971	Bdp1	B double prime 1, subunit of RNA polymerase III transcription initiation factor IIIB	0.473807	4.50688	8.84875	0.00472376	0.100658
ENSMUSG00000026788	ENSMUSG00000026788	71834	Zbtb43	zinc finger and BTB domain containing 43	0.46077	4.20884	8.84376	0.00473451	0.100688
ENSMUSG00000031703	ENSMUSG00000031703	71927	Itfg1	integrin alpha FG-GAP repeat containing 1	-0.319236	5.0197	8.83943	0.00474388	0.100688
ENSMUSG00000025402	ENSMUSG00000025402	17937	Nab2	Ngfi-A binding protein 2	0.592007	3.68147	8.83505	0.00475335	0.100691
ENSMUSG00000034371	ENSMUSG00000034371	225913	Tkfc	triokinase, FMN cyclase	-0.397462	7.60712	8.82927	0.00476589	0.100758
ENSMUSG00000050310	ENSMUSG00000050310	78757	Rictor	RPTOR independent companion of MTOR, complex 2	0.458746	4.33746	8.7962	0.00483836	0.101958
ENSMUSG00000022540	ENSMUSG00000022540	66049	Rogdi	rogdi homolog	-0.565221	3.12933	8.79207	0.00484748	0.101958
ENSMUSG00000004934	ENSMUSG00000004934	59004	Pias4	protein inhibitor of activated STAT 4	0.4094	3.95415	8.79045	0.00485108	0.101958
ENSMUSG00000044139	ENSMUSG00000044139	330657	Prss53	protease, serine 53	1.06881	1.71839	8.77228	0.00489149	0.102607
ENSMUSG00000022601	ENSMUSG00000022601	271377	Zbtb11	zinc finger and BTB domain containing 11	0.361572	4.09518	8.71389	0.00502381	0.105035
ENSMUSG00000033022	ENSMUSG00000033022	12583	Cdo1	cysteine dioxygenase 1, cytosolic	0.333171	10.317	8.70685	0.00504001	0.105035
ENSMUSG00000051652	ENSMUSG00000051652	237387	Lrrc3	leucine rich repeat containing 3	0.394278	5.18573	8.70478	0.00504478	0.105035
ENSMUSG00000027397	ENSMUSG00000027397	20515	Slc20a1	solute carrier family 20, member 1	-0.818874	5.05524	8.82981	0.00504629	0.105035
ENSMUSG00000038894	ENSMUSG00000038894	384783	Irs2	insulin receptor substrate 2	0.519792	4.30257	8.66263	0.0051431	0.106843
ENSMUSG00000026766	ENSMUSG00000026766	109129	Mmadhc	methylmalonic aciduria (cobalamin deficiency) cblD type, with homocystinuria	-0.358261	6.12768	8.64564	0.00518329	0.107471
ENSMUSG00000026478	ENSMUSG00000026478	226519	Lamc1	laminin, gamma 1	-0.673359	2.8219	8.63294	0.00521357	0.107891
ENSMUSG00000006717	ENSMUSG00000006717	66834	Acot13	acyl-CoA thioesterase 13	-0.376436	7.00223	8.62282	0.00523783	0.108023
ENSMUSG00000021294	ENSMUSG00000021294	668303	Kif26a	kinesin family member 26A	-0.949275	1.10234	8.6219	0.00524003	0.108023
ENSMUSG00000020604	ENSMUSG00000020604	74008	Arsg	arylsulfatase G	-0.720498	4.17604	8.65802	0.00525646	0.108154
ENSMUSG00000021149	ENSMUSG00000021149	69237	Gtpbp4	GTP binding protein 4	0.390118	5.27548	8.58882	0.00532018	0.109257
ENSMUSG00000036941	ENSMUSG00000036941	114615	Elac1	elaC ribonuclease Z 1	0.810594	2.62583	8.57746	0.00534799	0.10946
ENSMUSG00000033685	ENSMUSG00000033685	22228	Ucp2	uncoupling protein 2 (mitochondrial, proton carrier)	-1.0667	3.99644	8.72554	0.00535115	0.10946
ENSMUSG00000004105	ENSMUSG00000004105	26360	Angptl2	angiopoietin-like 2	-0.859489	3.04495	8.57747	0.00536705	0.10946
ENSMUSG00000037902	ENSMUSG00000037902	19261	Sirpa	signal-regulatory protein alpha	-0.905034	4.17603	8.67978	0.00537077	0.10946
ENSMUSG00000020766	ENSMUSG00000020766	14635	Galk1	galactokinase 1	-0.544167	5.85591	8.58278	0.00538552	0.109553
ENSMUSG00000036885	ENSMUSG00000036885	622434	Arhgef26	Rho guanine nucleotide exchange factor (GEF) 26	0.561664	4.55305	8.55274	0.00540908	0.109825
ENSMUSG00000023829	ENSMUSG00000023829	20517	Slc22a1	solute carrier family 22 (organic cation transporter), member 1	-0.313452	7.69647	8.52908	0.00546822	0.110816
ENSMUSG00000039220	ENSMUSG00000039220	52040	Ppp1r10	protein phosphatase 1, regulatory subunit 10	0.475866	4.66517	8.52221	0.00548553	0.110958
ENSMUSG00000000823	ENSMUSG00000000823	269401	Zfp512b	zinc finger protein 512B	0.574275	3.4277	8.51749	0.00549744	0.11099
ENSMUSG00000045441	ENSMUSG00000045441	243385	Gprin3	GPRIN family member 3	0.485148	5.70603	8.51022	0.00551587	0.111154
ENSMUSG00000025862	ENSMUSG00000025862	20843	Stag2	stromal antigen 2	0.364937	5.21724	8.50477	0.00552971	0.111225
ENSMUSG00000021365	ENSMUSG00000021365	18003	Nedd9	neural precursor cell expressed, developmentally down-regulated gene 9	-0.940562	2.42275	8.48951	0.00556868	0.111796
ENSMUSG00000071178	ENSMUSG00000071178	20701	Serpina1b	serine (or cysteine) preptidase inhibitor, clade A, member 1B	0.464077	12.6518	8.48554	0.00557888	0.111796
ENSMUSG00000032193	ENSMUSG00000032193	16835	Ldlr	low density lipoprotein receptor	-0.429742	7.57474	8.47291	0.00561142	0.11188
ENSMUSG00000029661	ENSMUSG00000029661	12843	Col1a2	collagen, type I, alpha 2	-1.50666	5.13119	8.67869	0.00562707	0.11188
ENSMUSG00000021036	ENSMUSG00000021036	20773	Sptlc2	serine palmitoyltransferase, long chain base subunit 2	-0.487724	3.67456	8.46543	0.00563077	0.11188
ENSMUSG00000048915	ENSMUSG00000048915	13640	Efna5	ephrin A5	0.543691	2.67306	8.46347	0.00563587	0.11188
ENSMUSG00000040043	ENSMUSG00000040043	56516	Rbms2	RNA binding motif, single stranded interacting protein 2	-0.827414	2.23067	8.4634	0.00563605	0.11188
ENSMUSG00000075266	ENSMUSG00000075266	66311	Cenpw	centromere protein W	-0.758697	2.53731	8.45977	0.00564548	0.11188
ENSMUSG00000045414	ENSMUSG00000045414	68861	Dipk2a	divergent protein kinase domain 2A	-0.507909	4.98633	8.45384	0.00566092	0.11198
ENSMUSG00000065954	ENSMUSG00000065954	320165	Tacc1	transforming, acidic coiled-coil containing protein 1	0.296302	5.78149	8.44222	0.00569132	0.112222
ENSMUSG00000055730	ENSMUSG00000055730	102022	Ces2a	carboxylesterase 2A	0.577285	6.13901	8.48766	0.0057016	0.112222
ENSMUSG00000034855	ENSMUSG00000034855	15945	Cxcl10	chemokine (C-X-C motif) ligand 10	-1.02813	3.05377	8.4989	0.00570591	0.112222
ENSMUSG00000031434	ENSMUSG00000031434	75746	Morc4	microrchidia 4	-0.988704	2.41098	8.43327	0.00571485	0.112222
ENSMUSG00000045576	ENSMUSG00000045576	229681	St7l	suppression of tumorigenicity 7-like	0.446571	3.6591	8.42726	0.00573073	0.112329
ENSMUSG00000042328	ENSMUSG00000042328	192232	Hps4	HPS4, biogenesis of lysosomal organelles complex 3 subunit 2	0.54943	3.62986	8.41956	0.00575111	0.112523
ENSMUSG00000026043	ENSMUSG00000026043	12825	Col3a1	collagen, type III, alpha 1	-1.56056	5.72433	8.6171	0.00578189	0.11292
ENSMUSG00000026398	ENSMUSG00000026398	26424	Nr5a2	nuclear receptor subfamily 5, group A, member 2	0.390528	6.16946	8.39729	0.00581049	0.113273
ENSMUSG00000020482	ENSMUSG00000020482	104479	Ccdc117	coiled-coil domain containing 117	0.462072	3.5113	8.37925	0.00585908	0.114014
ENSMUSG00000030789	ENSMUSG00000030789	16411	Itgax	integrin alpha X	-1.90199	1.25457	8.40406	0.00588158	0.114245
ENSMUSG00000021591	ENSMUSG00000021591	93692	Glrx	glutaredoxin	-0.410985	4.84101	8.36056	0.00590988	0.114588
ENSMUSG00000037706	ENSMUSG00000037706	12520	Cd81	CD81 antigen	-0.32237	8.34898	8.35602	0.00592231	0.114622
ENSMUSG00000024241	ENSMUSG00000024241	20662	Sos1	SOS Ras/Rac guanine nucleotide exchange factor 1	0.386205	4.71576	8.33666	0.00597553	0.115402
ENSMUSG00000021906	ENSMUSG00000021906	218885	Oxnad1	oxidoreductase NAD-binding domain containing 1	-0.411791	4.41908	8.33358	0.00598406	0.115402
ENSMUSG00000045136	ENSMUSG00000045136	73710	Tubb2b	tubulin, beta 2B class IIB	-1.82978	2.55885	8.49059	0.00600731	0.115549
ENSMUSG00000069044	ENSMUSG00000069044	107868	Usp9y	ubiquitin specific peptidase 9, Y chromosome	-0.807702	3.15966	8.32825	0.00601314	0.115549
ENSMUSG00000079419	ENSMUSG00000079419	73656	Ms4a6c	membrane-spanning 4-domains, subfamily A, member 6C	-0.933637	2.8881	8.3306	0.00604171	0.115772
ENSMUSG00000025089	ENSMUSG00000025089	14585	Gfra1	glial cell line derived neurotrophic factor family receptor alpha 1	0.394661	6.15748	8.31121	0.00604628	0.115772
ENSMUSG00000020863	ENSMUSG00000020863	67684	Luc7l3	LUC7-like 3 (S. cerevisiae)	0.335005	6.65341	8.29659	0.00608733	0.116351
ENSMUSG00000032253	ENSMUSG00000032253	83946	Phip	pleckstrin homology domain interacting protein	0.324336	4.75903	8.27138	0.0061588	0.117267
ENSMUSG00000025289	ENSMUSG00000025289	53381	Prdx4	peroxiredoxin 4	0.319065	6.32203	8.26471	0.00617787	0.117267
ENSMUSG00000032312	ENSMUSG00000032312	12988	Csk	c-src tyrosine kinase	0.444522	5.50146	8.26357	0.00618112	0.117267
ENSMUSG00000026098	ENSMUSG00000026098	227099	Pms1	PMS1 homolog 1, mismatch repair system component	0.910369	2.06913	8.26223	0.00618496	0.117267
ENSMUSG00000041654	ENSMUSG00000041654	69806	Slc39a11	solute carrier family 39 (metal ion transporter), member 11	-0.456005	4.8004	8.26058	0.0061897	0.117267
ENSMUSG00000026031	ENSMUSG00000026031	12633	Cflar	CASP8 and FADD-like apoptosis regulator	0.289467	5.75178	8.23417	0.00626592	0.118502
ENSMUSG00000028648	ENSMUSG00000028648	595136	Ndufs5	NADH:ubiquinone oxidoreductase core subunit S5	-0.284184	6.54829	8.22702	0.00628672	0.118557
ENSMUSG00000031645	ENSMUSG00000031645	109821	F11	coagulation factor XI	0.738892	4.45195	8.29614	0.00629085	0.118557
ENSMUSG00000022098	ENSMUSG00000022098	12153	Bmp1	bone morphogenetic protein 1	0.45302	5.48349	8.21645	0.00631764	0.118653
ENSMUSG00000024483	ENSMUSG00000024483	108857	Ankhd1	ankyrin repeat and KH domain containing 1	0.33002	6.18236	8.21632	0.00631803	0.118653
ENSMUSG00000038872	ENSMUSG00000038872	11906	Zfhx3	zinc finger homeobox 3	0.322419	5.41241	8.20879	0.00634011	0.118774
ENSMUSG00000035248	ENSMUSG00000035248	214290	Tut7	terminal uridylyl transferase 7	0.324475	6.23574	8.20662	0.00634652	0.118774
ENSMUSG00000032231	ENSMUSG00000032231	12306	Anxa2	annexin A2	-1.36964	5.4568	8.39915	0.0063674	0.118958
ENSMUSG00000028059	ENSMUSG00000028059	16800	Arhgef2	rho/rac guanine nucleotide exchange factor (GEF) 2	-0.871108	2.71917	8.19075	0.00639344	0.119052
ENSMUSG00000022385	ENSMUSG00000022385	29870	Gtse1	G two S phase expressed protein 1	-1.97892	0.669802	8.20522	0.00639456	0.119052
ENSMUSG00000024677	ENSMUSG00000024677	69774	Ms4a6b	membrane-spanning 4-domains, subfamily A, member 6B	-1.33621	1.83774	8.18099	0.00644629	0.119807
ENSMUSG00000079293	ENSMUSG00000079293	56644	Clec7a	C-type lectin domain family 7, member a	-1.22886	3.91076	8.32834	0.0064665	0.119892
ENSMUSG00000056608	ENSMUSG00000056608	109151	Chd9	chromodomain helicase DNA binding protein 9	0.350839	5.40825	8.16409	0.00647309	0.119892
ENSMUSG00000038866	ENSMUSG00000038866	227449	Zcchc2	zinc finger, CCHC domain containing 2	0.584744	4.192	8.15903	0.00648832	0.119967
ENSMUSG00000058317	ENSMUSG00000058317	218793	Ube2e2	ubiquitin-conjugating enzyme E2E 2	-0.536141	3.77456	8.14933	0.00651764	0.120295
ENSMUSG00000041261	ENSMUSG00000041261	12319	Car8	carbonic anhydrase 8	0.456112	5.90095	8.14215	0.00653941	0.120295
ENSMUSG00000022965	ENSMUSG00000022965	15980	Ifngr2	interferon gamma receptor 2	-0.52388	3.70734	8.142	0.00653987	0.120295
ENSMUSG00000019188	ENSMUSG00000019188	14950	H13	histocompatibility 13	0.277044	6.31229	8.13843	0.00655076	0.120295
ENSMUSG00000069456	ENSMUSG00000069456	19683	Rdh16	retinol dehydrogenase 16	-0.509609	7.00363	8.13911	0.00660851	0.121149
ENSMUSG00000038990	ENSMUSG00000038990	252966	Cables2	CDK5 and Abl enzyme substrate 2	0.507024	4.05726	8.1052	0.00665279	0.121522
ENSMUSG00000006529	ENSMUSG00000006529	16424	Itih1	inter-alpha trypsin inhibitor, heavy chain 1	0.555352	7.46142	8.1501	0.00665563	0.121522
ENSMUSG00000060519	ENSMUSG00000060519	30935	Tor3a	torsin family 3, member A	-0.65449	3.40181	8.10199	0.00666274	0.121522
ENSMUSG00000031402	ENSMUSG00000031402	17524	Mpp1	membrane protein, palmitoylated	-0.423248	4.85097	8.09348	0.00668918	0.121797
ENSMUSG00000037608	ENSMUSG00000037608	72567	Bclaf1	BCL2-associated transcription factor 1	0.358468	6.2769	8.06114	0.00679068	0.123437
ENSMUSG00000054814	ENSMUSG00000054814	69727	Usp46	ubiquitin specific peptidase 46	0.553521	3.19081	8.05688	0.00680419	0.123474
ENSMUSG00000026270	ENSMUSG00000026270	23830	Capn10	calpain 10	-0.462115	3.59363	8.04637	0.00683759	0.123789
ENSMUSG00000035439	ENSMUSG00000035439	76478	Haus8	4HAUS augmin-like complex, subunit 8	-1.13089	3.32892	8.15417	0.00684455	0.123789
ENSMUSG00000025153	ENSMUSG00000025153	14104	Fasn	fatty acid synthase	-0.809146	8.13425	8.17486	0.00687594	0.124148
ENSMUSG00000010663	ENSMUSG00000010663	76267	Fads1	fatty acid desaturase 1	-0.413597	9.04846	8.02856	0.00689462	0.124276
ENSMUSG00000030016	ENSMUSG00000030016	18139	Zfp638	zinc finger protein 638	0.296368	5.0943	8.02089	0.00691935	0.124514
ENSMUSG00000026389	ENSMUSG00000026389	68428	Steap3	STEAP family member 3	0.523207	3.10789	8.01142	0.00694998	0.124856
ENSMUSG00000043991	ENSMUSG00000043991	19290	Pura	purine rich element binding protein A	0.260735	7.23961	8.00041	0.00698578	0.12529
ENSMUSG00000008305	ENSMUSG00000008305	21885	Tle1	transducin-like enhancer of split 1	0.486155	5.12145	7.99326	0.00700914	0.1255
ENSMUSG00000021340	ENSMUSG00000021340	14756	Gpld1	glycosylphosphatidylinositol specific phospholipase D1	0.487659	6.60817	7.99642	0.00702915	0.125649
ENSMUSG00000005054	ENSMUSG00000005054	13014	Cstb	cystatin B	-0.766238	5.90813	8.10498	0.00705186	0.125846
ENSMUSG00000045316	ENSMUSG00000045316	68636	Fahd1	fumarylacetoacetate hydrolase domain containing 1	0.424222	5.87277	7.97215	0.00707858	0.126114
ENSMUSG00000022472	ENSMUSG00000022472	28075	Desi1	desumoylating isopeptidase 1	0.381471	5.27644	7.95333	0.00714111	0.127017
ENSMUSG00000067925	ENSMUSG00000067925	66158	Rtl8a	retrotransposon Gag like 8A	-0.48464	4.65338	7.94043	0.00718433	0.127575
ENSMUSG00000036023	ENSMUSG00000036023	11546	Parp2	poly (ADP-ribose) polymerase family, member 2	-0.703647	2.93427	7.92477	0.00723715	0.128301
ENSMUSG00000090213	ENSMUSG00000090213	407243	Tmem189	transmembrane protein 189	-0.530681	4.42267	7.88799	0.0073628	0.130314
ENSMUSG00000027782	ENSMUSG00000027782	16649	Kpna4	karyopherin (importin) alpha 4	0.353289	5.14593	7.88403	0.00737646	0.130342
ENSMUSG00000031007	ENSMUSG00000031007	70495	Atp6ap2	ATPase, H+ transporting, lysosomal accessory protein 2	-0.300302	5.33104	7.87623	0.00740349	0.130404
ENSMUSG00000030364	ENSMUSG00000030364	94071	Clec2h	C-type lectin domain family 2, member h	1.11426	3.2042	7.97559	0.00740976	0.130404
ENSMUSG00000075590	ENSMUSG00000075590	223649	Nrbp2	nuclear receptor binding protein 2	0.408874	4.42117	7.87252	0.00741636	0.130404
ENSMUSG00000058761	ENSMUSG00000058761	108937	Rnf169	ring finger protein 169	0.388281	5.66663	7.86786	0.00743258	0.130476
ENSMUSG00000024425	ENSMUSG00000024425	65113	Ndfip1	Nedd4 family interacting protein 1	0.271006	7.57258	7.86362	0.00744737	0.130523
ENSMUSG00000028251	ENSMUSG00000028251	77032	Tstd3	thiosulfate sulfurtransferase (rhodanese)-like domain containing 3	-0.375858	4.45161	7.85994	0.0074602	0.130535
ENSMUSG00000019889	ENSMUSG00000019889	19272	Ptprk	protein tyrosine phosphatase, receptor type, K	0.332369	5.57436	7.83984	0.00753084	0.131557
ENSMUSG00000046070	ENSMUSG00000046070	16005	Igfals	insulin-like growth factor binding protein, acid labile subunit	0.665669	6.30926	7.92519	0.00755359	0.131741
ENSMUSG00000030287	ENSMUSG00000030287	16439	Itpr2	inositol 1,4,5-triphosphate receptor 2	0.287696	6.07328	7.82706	0.00757613	0.13192
ENSMUSG00000024029	ENSMUSG00000024029	21786	Tff3	trefoil factor 3, intestinal	1.9576	1.89969	7.89992	0.00760919	0.132282
ENSMUSG00000059890	ENSMUSG00000059890	140630	Ube4a	ubiquitination factor E4A	0.558751	3.17662	7.80478	0.00765579	0.132877
ENSMUSG00000040181	ENSMUSG00000040181	14261	Fmo1	flavin containing monooxygenase 1	-0.402607	6.21856	7.78222	0.00773732	0.134061
ENSMUSG00000034329	ENSMUSG00000034329	237911	Brip1	BRCA1 interacting protein C-terminal helicase 1	0.8141	2.07488	7.77657	0.00775787	0.134061
ENSMUSG00000023805	ENSMUSG00000023805	20975	Synj2	synaptojanin 2	-0.738411	2.38969	7.77554	0.00776164	0.134061
ENSMUSG00000032135	ENSMUSG00000032135	84004	Mcam	melanoma cell adhesion molecule	-1.08683	1.78311	7.7722	0.00777383	0.134061
ENSMUSG00000027792	ENSMUSG00000027792	12038	Bche	butyrylcholinesterase	-0.312365	6.11127	7.7682	0.00778844	0.134098
ENSMUSG00000061393	ENSMUSG00000061393	11481	Acvr2b	activin receptor IIB	0.645569	2.85487	7.76405	0.00780367	0.134146
ENSMUSG00000067916	ENSMUSG00000067916	666532	Zfp991	zinc finger protein 991	-0.612347	3.65608	7.75839	0.00782445	0.134289
ENSMUSG00000020180	ENSMUSG00000020180	67332	Snrpd3	small nuclear ribonucleoprotein D3	0.529115	5.22464	7.76037	0.00785577	0.134377
ENSMUSG00000031590	ENSMUSG00000031590	14300	Frg1	FSHD region gene 1	0.48185	4.60748	7.74804	0.00786261	0.134377
ENSMUSG00000034382	ENSMUSG00000034382	224833	AI661453	expressed sequence AI661453	0.485482	3.468	7.74684	0.00786707	0.134377
ENSMUSG00000112129	ENSMUSG00000112129	68371	Pbld1	phenazine biosynthesis-like protein domain containing 1	0.341272	6.51612	7.73323	0.00791759	0.134905
ENSMUSG00000000290	ENSMUSG00000000290	16414	Itgb2	integrin beta 2	-0.986209	2.51288	7.73802	0.00793493	0.134905
ENSMUSG00000089824	ENSMUSG00000089824	75710	Rbm12	RNA binding motif protein 12	0.683114	2.5094	7.72841	0.00793556	0.134905
ENSMUSG00000030122	ENSMUSG00000030122	69202	Ptms	parathymosin	0.346482	7.96214	7.71829	0.00797346	0.135335
ENSMUSG00000022462	ENSMUSG00000022462	67760	Slc38a2	solute carrier family 38, member 2	0.3679	6.34207	7.69867	0.00804746	0.136307
ENSMUSG00000063362	ENSMUSG00000063362	207958	Alg11	asparagine-linked glycosylation 11 (alpha-1,2-mannosyltransferase)	0.400354	4.74864	7.6964	0.00805606	0.136307
ENSMUSG00000025875	ENSMUSG00000025875	74257	Tspan17	tetraspanin 17	-0.9763	1.57769	7.68396	0.00810339	0.136834
ENSMUSG00000025785	ENSMUSG00000025785	66446	Exosc7	exosome component 7	-0.421807	4.72279	7.6803	0.00811738	0.136834
ENSMUSG00000038415	ENSMUSG00000038415	15220	Foxq1	forkhead box Q1	1.12503	4.98844	7.84002	0.00813419	0.136834
ENSMUSG00000047735	ENSMUSG00000047735	209086	Samd9l	sterile alpha motif domain containing 9-like	-0.655481	3.64987	7.67203	0.00814908	0.136834
ENSMUSG00000028995	ENSMUSG00000028995	84652	Fam126a	family with sequence similarity 126, member A	-0.527062	4.32914	7.6677	0.00816572	0.136834
ENSMUSG00000017670	ENSMUSG00000017670	140579	Elmo2	engulfment and cell motility 2	-0.695439	2.29379	7.665	0.00817616	0.136834
ENSMUSG00000038079	ENSMUSG00000038079	381259	Tmem237	transmembrane protein 237	-0.654314	2.67187	7.65636	0.00820953	0.136834
ENSMUSG00000018774	ENSMUSG00000018774	12514	Cd68	CD68 antigen	-0.916029	3.47504	7.72099	0.00821948	0.136834
ENSMUSG00000053329	ENSMUSG00000053329	28295	Gatd3a	glutamine amidotransferase like class 1 domain containing 3A	-0.336862	6.81548	7.65284	0.00822316	0.136834
ENSMUSG00000024383	ENSMUSG00000024383	26405	Map3k2	mitogen-activated protein kinase kinase kinase 2	0.392598	4.76826	7.65151	0.00822831	0.136834
ENSMUSG00000020776	ENSMUSG00000020776	217335	Fbf1	Fas (TNFRSF6) binding factor 1	-0.780905	3.37921	7.67066	0.00823858	0.136834
ENSMUSG00000030086	ENSMUSG00000030086	66098	Chchd6	coiled-coil-helix-coiled-coil-helix domain containing 6	-0.697992	2.35201	7.64856	0.00823978	0.136834
ENSMUSG00000043421	ENSMUSG00000043421	69573	Hilpda	hypoxia inducible lipid droplet associated	-0.684732	2.97232	7.63512	0.00829219	0.137368
ENSMUSG00000053604	ENSMUSG00000053604	19895	Rpia	ribose 5-phosphate isomerase A	-0.669931	2.44182	7.6337	0.00829775	0.137368
ENSMUSG00000026542	ENSMUSG00000026542	20219	Apcs	serum amyloid P-component	-0.478504	5.95642	7.63051	0.00831022	0.137368
ENSMUSG00000002870	ENSMUSG00000002870	17216	Mcm2	minichromosome maintenance complex component 2	-0.864099	1.9854	7.62095	0.00834781	0.137777
ENSMUSG00000038387	ENSMUSG00000038387	20130	Rras	related RAS viral (r-ras) oncogene	-0.466997	4.94156	7.61357	0.00837697	0.137994
ENSMUSG00000024604	ENSMUSG00000024604	66810	Rbm22	RNA binding motif protein 22	0.373561	3.82918	7.61114	0.00838657	0.137994
ENSMUSG00000026615	ENSMUSG00000026615	107508	Eprs	glutamyl-prolyl-tRNA synthetase	0.299554	6.95119	7.60203	0.00842275	0.138231
ENSMUSG00000029174	ENSMUSG00000029174	57915	Tbc1d1	TBC1 domain family, member 1	-0.829025	2.26499	7.59967	0.00843213	0.138231
ENSMUSG00000075706	ENSMUSG00000075706	625249	Gpx4	glutathione peroxidase 4	-0.546965	7.94733	7.63767	0.00844505	0.138231
ENSMUSG00000079037	ENSMUSG00000079037	19122	Prnp	prion protein	-0.404621	5.29118	7.5946	0.00845237	0.138231
ENSMUSG00000079429	ENSMUSG00000079429	100040766	Mroh2a	maestro heat-like repeat family member 2A	-1.00325	1.05748	7.58937	0.00847327	0.138278
ENSMUSG00000006398	ENSMUSG00000006398	107995	Cdc20	cell division cycle 20	-1.67709	1.64814	7.644	0.00848092	0.138278
ENSMUSG00000002769	ENSMUSG00000002769	14711	Gnmt	glycine N-methyltransferase	0.527829	10.8695	7.58476	0.00852083	0.138598
ENSMUSG00000024423	ENSMUSG00000024423	16210	Impact	impact, RWD domain protein	-0.576309	3.41303	7.57376	0.008536	0.138598
ENSMUSG00000022237	ENSMUSG00000022237	67434	Ankrd33b	ankyrin repeat domain 33B	0.714298	3.19134	7.57099	0.00854721	0.138598
ENSMUSG00000021457	ENSMUSG00000021457	20963	Syk	spleen tyrosine kinase	-1.04962	1.8528	7.56707	0.00856306	0.138598
ENSMUSG00000010651	ENSMUSG00000010651	235674	Acaa1b	acetyl-Coenzyme A acyltransferase 1B	-0.490443	10.7396	7.5666	0.00856495	0.138598
ENSMUSG00000023094	ENSMUSG00000023094	76467	Msrb2	methionine sulfoxide reductase B2	-0.492148	4.20969	7.55474	0.00861312	0.13877
ENSMUSG00000005683	ENSMUSG00000005683	12974	Cs	citrate synthase	-0.313028	6.12977	7.54842	0.00863893	0.13877
ENSMUSG00000053559	ENSMUSG00000053559	207818	Smagp	small cell adhesion glycoprotein	0.388981	5.31159	7.54545	0.00865108	0.13877
ENSMUSG00000037894	ENSMUSG00000037894	51788	H2afz	H2A histone family, member Z	-0.471293	6.79465	7.54894	0.00866396	0.13877
ENSMUSG00000057465	ENSMUSG00000057465	20209	Saa2	serum amyloid A 2	-1.03887	6.51874	7.69898	0.00868186	0.13877
ENSMUSG00000022307	ENSMUSG00000022307	170719	Oxr1	oxidation resistance 1	0.29769	5.24575	7.53761	0.0086832	0.13877
ENSMUSG00000071177	ENSMUSG00000071177	20703	Serpina1d	serine (or cysteine) peptidase inhibitor, clade A, member 1D	0.467223	12.3345	7.53241	0.00870461	0.13877
ENSMUSG00000022994	ENSMUSG00000022994	11512	Adcy6	adenylate cyclase 6	-0.559896	3.7451	7.52903	0.00871854	0.13877
ENSMUSG00000057234	ENSMUSG00000057234	76894	Mettl15	methyltransferase like 15	-0.834174	2.26634	7.52786	0.00872339	0.13877
ENSMUSG00000004558	ENSMUSG00000004558	29811	Ndrg2	N-myc downstream regulated gene 2	0.448356	10.1953	7.52595	0.00873128	0.13877
ENSMUSG00000020027	ENSMUSG00000020027	216233	Socs2	suppressor of cytokine signaling 2	1.00968	4.86906	7.66275	0.00876532	0.13877
ENSMUSG00000030232	ENSMUSG00000030232	11569	Aebp2	AE binding protein 2	-0.453826	4.43891	7.51745	0.00876647	0.13877
ENSMUSG00000002455	ENSMUSG00000002455	68879	Prpf6	pre-mRNA splicing factor 6	0.3997	5.37915	7.51724	0.00876737	0.13877
ENSMUSG00000026614	ENSMUSG00000026614	226781	Slc30a10	solute carrier family 30, member 10	0.671257	4.80043	7.57736	0.00877595	0.13877
ENSMUSG00000029346	ENSMUSG00000029346	70118	Srrd	SRR1 domain containing	0.611894	3.01796	7.51419	0.00878004	0.13877
ENSMUSG00000021779	ENSMUSG00000021779	21834	Thrb	thyroid hormone receptor beta	0.300096	5.20684	7.51255	0.00878685	0.13877
ENSMUSG00000036073	ENSMUSG00000036073	14430	Galt	galactose-1-phosphate uridyl transferase	0.312761	5.08503	7.51063	0.00879485	0.13877
ENSMUSG00000030527	ENSMUSG00000030527	70461	Crtc3	CREB regulated transcription coactivator 3	0.455047	3.93405	7.50152	0.00883287	0.138855
ENSMUSG00000018459	ENSMUSG00000018459	114644	Slc13a3	solute carrier family 13 (sodium-dependent dicarboxylate transporter), member 3	-0.802656	4.20796	7.58051	0.00883736	0.138855
ENSMUSG00000024818	ENSMUSG00000024818	107375	Slc25a45	solute carrier family 25, member 45	0.367779	4.66284	7.50007	0.00883893	0.138855
ENSMUSG00000019942	ENSMUSG00000019942	12534	Cdk1	cyclin-dependent kinase 1	-1.52689	2.49306	7.59634	0.00891357	0.139493
ENSMUSG00000030590	ENSMUSG00000030590	73833	Fam98c	family with sequence similarity 98, member C	0.556325	3.9888	7.48187	0.00891553	0.139493
ENSMUSG00000027951	ENSMUSG00000027951	56417	Adar	adenosine deaminase, RNA-specific	0.397417	3.79684	7.47269	0.0089544	0.139493
ENSMUSG00000029373	ENSMUSG00000029373	56744	Pf4	platelet factor 4	-0.98423	2.07297	7.47033	0.00896442	0.139493
ENSMUSG00000046811	ENSMUSG00000046811	216871	Gltpd2	glycolipid transfer protein domain containing 2	0.350499	5.53798	7.47003	0.0089657	0.139493
ENSMUSG00000039217	ENSMUSG00000039217	16173	Il18	interleukin 18	0.396015	3.93075	7.46945	0.00896819	0.139493
ENSMUSG00000025574	ENSMUSG00000025574	21877	Tk1	thymidine kinase 1	0.545499	4.11507	7.46896	0.00897026	0.139493
ENSMUSG00000074115	ENSMUSG00000074115	20208	Saa1	serum amyloid A 1	-0.854719	7.21095	7.60314	0.00898543	0.139527
ENSMUSG00000041720	ENSMUSG00000041720	224020	Pi4ka	phosphatidylinositol 4-kinase alpha	-0.438338	4.63419	7.45382	0.00903493	0.140093
ENSMUSG00000009614	ENSMUSG00000009614	192166	Sardh	sarcosine dehydrogenase	0.425379	8.80078	7.42401	0.00916369	0.141885
ENSMUSG00000035877	ENSMUSG00000035877	320799	Zhx3	zinc fingers and homeoboxes 3	0.398423	5.58939	7.41233	0.00921463	0.142469
ENSMUSG00000071655	ENSMUSG00000071655	225896	Ubxn1	UBX domain protein 1	0.349214	7.33768	7.40872	0.00923047	0.142509
ENSMUSG00000091264	ENSMUSG00000091264	108934	Smim13	small integral membrane protein 13	0.355128	4.35545	7.39839	0.00927591	0.142701
ENSMUSG00000036398	ENSMUSG00000036398	76497	Ppp1r11	protein phosphatase 1, regulatory inhibitor subunit 11	0.350673	4.80736	7.39758	0.00927944	0.142701
ENSMUSG00000031877	ENSMUSG00000031877	72361	Ces2g	carboxylesterase 2G	-0.455706	4.90912	7.39686	0.00928263	0.142701
ENSMUSG00000054733	ENSMUSG00000054733	110265	Msra	methionine sulfoxide reductase A	-0.288066	7.17602	7.38934	0.00931589	0.143007
ENSMUSG00000031644	ENSMUSG00000031644	18004	Nek1	NIMA (never in mitosis gene a)-related expressed kinase 1	0.503428	3.76116	7.38498	0.0093352	0.1431
ENSMUSG00000041779	ENSMUSG00000041779	170829	Tram2	translocating chain-associating membrane protein 2	0.418204	3.93492	7.37943	0.00935989	0.143244
ENSMUSG00000095440	ENSMUSG00000095440	668225	Fignl2	fidgetin-like 2	0.445285	3.41713	7.37688	0.00937125	0.143244
ENSMUSG00000024070	ENSMUSG00000024070	75292	Prkd3	protein kinase D3	0.379388	7.0534	7.36914	0.00940581	0.143569
ENSMUSG00000029445	ENSMUSG00000029445	15445	Hpd	4-hydroxyphenylpyruvic acid dioxygenase	0.640257	9.39345	7.39041	0.00962846	0.146592
ENSMUSG00000051285	ENSMUSG00000051285	319263	Pcmtd1	protein-L-isoaspartate (D-aspartate) O-methyltransferase domain containing 1	0.278558	8.20732	7.31941	0.00963112	0.146592
ENSMUSG00000020282	ENSMUSG00000020282	13650	Rhbdf1	rhomboid 5 homolog 1	-0.854781	2.70777	7.28236	0.00980275	0.148993
ENSMUSG00000049086	ENSMUSG00000049086	107771	Bmyc	brain expressed myelocytomatosis oncogene	-0.778456	2.66075	7.27214	0.00985063	0.149378
ENSMUSG00000057637	ENSMUSG00000057637	110593	Prdm2	PR domain containing 2, with ZNF domain	0.524726	4.16944	7.27105	0.00985578	0.149378
ENSMUSG00000025246	ENSMUSG00000025246	21372	Tbl1x	transducin (beta)-like 1 X-linked	0.448544	5.49066	7.26371	0.00989035	0.149691
ENSMUSG00000025232	ENSMUSG00000025232	15211	Hexa	hexosaminidase A	-0.435119	5.19169	7.25578	0.00992787	0.149934
ENSMUSG00000046876	ENSMUSG00000046876	20238	Atxn1	ataxin 1	0.468932	4.69306	7.25442	0.00993429	0.149934
ENSMUSG00000031767	ENSMUSG00000031767	67528	Nudt7	nudix (nucleoside diphosphate linked moiety X)-type motif 7	0.63309	7.95118	7.32903	0.00995084	0.149973
ENSMUSG00000039157	ENSMUSG00000039157	98952	Fam102a	family with sequence similarity 102, member A	-0.688872	4.65222	7.30025	0.0100085	0.150632
ENSMUSG00000034973	ENSMUSG00000034973	320615	Dop1a	DOP1 leucine zipper like protein A	0.409374	3.94793	7.22054	0.0100964	0.151485
ENSMUSG00000032440	ENSMUSG00000032440	21813	Tgfbr2	transforming growth factor, beta receptor II	-0.677072	3.65748	7.22766	0.0101064	0.151485
ENSMUSG00000069045	ENSMUSG00000069045	26900	Ddx3y	DEAD (Asp-Glu-Ala-Asp) box polypeptide 3, Y-linked	0.270582	5.91639	7.21825	0.0101075	0.151485
ENSMUSG00000051469	ENSMUSG00000051469	59057	Zfp24	zinc finger protein 24	0.437872	4.31452	7.2122	0.0101367	0.151713
ENSMUSG00000044734	ENSMUSG00000044734	66222	Serpinb1a	serine (or cysteine) peptidase inhibitor, clade B, member 1a	0.869103	3.46157	7.26899	0.0101543	0.151764
ENSMUSG00000037379	ENSMUSG00000037379	100689	Spon2	spondin 2, extracellular matrix protein	-0.861943	4.35644	7.29587	0.0102172	0.152279
ENSMUSG00000062624	ENSMUSG00000062624	545288	Cyp2c67	cytochrome P450, family 2, subfamily c, polypeptide 67	0.44594	7.05744	7.19494	0.0102207	0.152279
ENSMUSG00000034308	ENSMUSG00000034308	74032	Sdr42e1	short chain dehydrogenase/reductase family 42E, member 1	0.476344	6.39806	7.20475	0.010233	0.152279
ENSMUSG00000038534	ENSMUSG00000038534	71240	Osbpl7	oxysterol binding protein-like 7	-0.987469	1.57032	7.18991	0.0102453	0.152279
ENSMUSG00000009073	ENSMUSG00000009073	18016	Nf2	neurofibromin 2	0.374505	3.85212	7.18205	0.0102839	0.152642
ENSMUSG00000039910	ENSMUSG00000039910	17684	Cited2	Cbp/p300-interacting transactivator, with Glu/Asp-rich carboxy-terminal domain, 2	0.534272	4.3193	7.17549	0.0103163	0.152911
ENSMUSG00000000753	ENSMUSG00000000753	20317	Serpinf1	serine (or cysteine) peptidase inhibitor, clade F, member 1	0.248546	7.83418	7.16528	0.0103668	0.153449
ENSMUSG00000015217	ENSMUSG00000015217	15354	Hmgb3	high mobility group box 3	-0.565409	4.60909	7.17254	0.0103974	0.15369
ENSMUSG00000035686	ENSMUSG00000035686	21835	Thrsp	thyroid hormone responsive	-0.980196	7.44477	7.2991	0.0104223	0.153842
ENSMUSG00000037210	ENSMUSG00000037210	231128	Fam193a	family with sequence homology 193, member A	0.412298	5.14671	7.15133	0.0104363	0.153842
ENSMUSG00000096145	ENSMUSG00000096145	27973	Vkorc1	vitamin K epoxide reductase complex, subunit 1	0.357182	7.28987	7.13618	0.0105123	0.154751
ENSMUSG00000030774	ENSMUSG00000030774	18479	Pak1	p21 (RAC1) activated kinase 1	-1.21341	1.62992	7.12675	0.0105599	0.15524
ENSMUSG00000024155	ENSMUSG00000024155	75178	Meiob	meiosis specific with OB domains	0.770567	3.52123	7.14041	0.0106563	0.156315
ENSMUSG00000026605	ENSMUSG00000026605	108000	Cenpf	centromere protein F	-1.11081	1.78976	7.10665	0.0106621	0.156315
ENSMUSG00000045658	ENSMUSG00000045658	98496	Pid1	phosphotyrosine interaction domain containing 1	0.274074	6.09036	7.10074	0.0106924	0.156546
ENSMUSG00000066036	ENSMUSG00000066036	69116	Ubr4	ubiquitin protein ligase E3 component n-recognin 4	0.336185	6.75145	7.08359	0.0107808	0.157625
ENSMUSG00000043090	ENSMUSG00000043090	330788	Zfp866	zinc finger protein 866	0.804757	2.20037	7.07501	0.0108253	0.158061
ENSMUSG00000042419	ENSMUSG00000042419	18038	Nfkbil1	nuclear factor of kappa light polypeptide gene enhancer in B cells inhibitor like 1	1.07939	1.59814	7.06374	0.010884	0.158591
ENSMUSG00000026014	ENSMUSG00000026014	77300	Raph1	Ras association (RalGDS/AF-6) and pleckstrin homology domains 1	0.236056	6.59236	7.06239	0.0108911	0.158591
ENSMUSG00000035184	ENSMUSG00000035184	629059	Fam124a	family with sequence similarity 124, member A	-0.632142	3.55103	7.04246	0.0109959	0.159625
ENSMUSG00000027243	ENSMUSG00000027243	241547	Harbi1	harbinger transposase derived 1	0.464685	3.3059	7.03916	0.0110133	0.159625
ENSMUSG00000033860	ENSMUSG00000033860	99571	Fgg	fibrinogen gamma chain	0.393377	10.8697	7.03685	0.0110255	0.159625
ENSMUSG00000055991	ENSMUSG00000055991	22757	Zkscan5	zinc finger with KRAB and SCAN domains 5	0.546603	2.53294	7.03413	0.01104	0.159625
ENSMUSG00000020994	ENSMUSG00000020994	18949	Pnn	pinin	0.369146	4.75035	7.03329	0.0110444	0.159625
ENSMUSG00000022723	ENSMUSG00000022723	224273	Crybg3	beta-gamma crystallin domain containing 3	0.581378	2.79737	7.03205	0.011051	0.159625
ENSMUSG00000030382	ENSMUSG00000030382	26459	Slc27a5	solute carrier family 27 (fatty acid transporter), member 5	0.389576	8.65	7.02651	0.0110805	0.159835
ENSMUSG00000071662	ENSMUSG00000071662	67710	Polr2g	polymerase (RNA) II (DNA directed) polypeptide G	-0.321641	4.24367	7.00871	0.0111757	0.16066
ENSMUSG00000030610	ENSMUSG00000030610	76375	Det1	de-etiolated homolog 1 (Arabidopsis)	-0.502501	3.1864	7.0079	0.0111801	0.16066
ENSMUSG00000036202	ENSMUSG00000036202	51869	Rif1	replication timing regulatory factor 1	0.43496	5.10272	7.00747	0.0111825	0.16066
ENSMUSG00000029474	ENSMUSG00000029474	80751	Rnf34	ring finger protein 34	-0.754201	2.62193	7.00403	0.0112009	0.160711
ENSMUSG00000029270	ENSMUSG00000029270	67266	Dipk1a	divergent protein kinase domain 1A	0.627062	2.96588	6.98635	0.0112967	0.161745
ENSMUSG00000025792	ENSMUSG00000025792	27376	Slc25a10	solute carrier family 25 (mitochondrial carrier, dicarboxylate transporter), member 10	-0.357033	7.0746	6.98152	0.011323	0.161745
ENSMUSG00000028779	ENSMUSG00000028779	67898	Pef1	penta-EF hand domain containing 1	-0.326799	5.25226	6.97773	0.0113437	0.161745
ENSMUSG00000027598	ENSMUSG00000027598	16396	Itch	itchy, E3 ubiquitin protein ligase	0.411576	4.51249	6.97551	0.0113558	0.161745
ENSMUSG00000039298	ENSMUSG00000039298	214444	Cdk5rap2	CDK5 regulatory subunit associated protein 2	0.627981	2.27358	6.97386	0.0113648	0.161745
ENSMUSG00000032000	ENSMUSG00000032000	11796	Birc3	baculoviral IAP repeat-containing 3	-0.672655	2.81401	6.97156	0.0113774	0.161745
ENSMUSG00000027698	ENSMUSG00000027698	320024	Nceh1	neutral cholesterol ester hydrolase 1	-0.404937	5.18978	6.97141	0.0113782	0.161745
ENSMUSG00000021413	ENSMUSG00000021413	19134	Prpf4b	pre-mRNA processing factor 4B	0.450896	6.16801	6.96708	0.0114094	0.161974
ENSMUSG00000046722	ENSMUSG00000046722	57912	Cdc42se1	CDC42 small effector 1	-0.567675	3.9802	6.94278	0.0115363	0.163448
ENSMUSG00000040660	ENSMUSG00000040660	13094	Cyp2b9	cytochrome P450, family 2, subfamily b, polypeptide 9	-1.30197	5.89324	7.08826	0.0115436	0.163448
ENSMUSG00000035385	ENSMUSG00000035385	20296	Ccl2	chemokine (C-C motif) ligand 2	-1.40198	1.62743	6.9575	0.0115694	0.163489
ENSMUSG00000024526	ENSMUSG00000024526	12683	Cidea	cell death-inducing DNA fragmentation factor, alpha subunit-like effector A	-1.70692	3.81969	7.08007	0.0115876	0.163489
ENSMUSG00000075705	ENSMUSG00000075705	27361	Msrb1	methionine sulfoxide reductase B1	0.292532	8.66376	6.93249	0.0115937	0.163489
ENSMUSG00000005718	ENSMUSG00000005718	83383	Tfap4	transcription factor AP4	0.704063	1.94026	6.93006	0.0116073	0.163489
ENSMUSG00000024887	ENSMUSG00000024887	54447	Asah2	N-acylsphingosine amidohydrolase 2	-0.415289	4.3848	6.91944	0.0116669	0.164115
ENSMUSG00000028633	ENSMUSG00000028633	51797	Ctps	cytidine 5'-triphosphate synthase	-0.725945	1.98474	6.9154	0.0116897	0.16422
ENSMUSG00000029821	ENSMUSG00000029821	54722	Gsdme	gasdermin E	-1.13766	0.760755	6.91	0.0117202	0.164403
ENSMUSG00000021488	ENSMUSG00000021488	18193	Nsd1	nuclear receptor-binding SET-domain protein 1	0.251629	5.67974	6.90769	0.0117332	0.164403
ENSMUSG00000066154	ENSMUSG00000066154	17842	Mup3	major urinary protein 3	0.830008	12.6259	6.99084	0.0118179	0.165374
ENSMUSG00000024426	ENSMUSG00000024426	73242	Atat1	alpha tubulin acetyltransferase 1	0.505863	3.80554	6.88841	0.011843	0.165509
ENSMUSG00000096956	ENSMUSG00000096956	100616095	Snhg18	small nucleolar RNA host gene 18	-0.878199	2.89222	6.90542	0.0118612	0.165549
ENSMUSG00000031431	ENSMUSG00000031431	14605	Tsc22d3	TSC22 domain family, member 3	0.573499	5.41345	6.9246	0.0118774	0.16556
ENSMUSG00000033533	ENSMUSG00000033533	117147	Acsm1	acyl-CoA synthetase medium-chain family member 1	0.3715	7.70668	6.87298	0.0119316	0.165985
ENSMUSG00000040212	ENSMUSG00000040212	13732	Emp3	epithelial membrane protein 3	-0.852386	2.64202	6.87079	0.0119442	0.165985
ENSMUSG00000048217	ENSMUSG00000048217	217214	Nags	N-acetylglutamate synthase	0.326371	5.21137	6.86843	0.0119579	0.165985
ENSMUSG00000031304	ENSMUSG00000031304	16186	Il2rg	interleukin 2 receptor, gamma chain	-0.867854	1.96311	6.86637	0.0119698	0.165985
ENSMUSG00000034330	ENSMUSG00000034330	234779	Plcg2	phospholipase C, gamma 2	-1.36752	0.859477	6.86315	0.0119884	0.165985
ENSMUSG00000032280	ENSMUSG00000032280	21887	Tle3	transducin-like enhancer of split 3	-0.461683	3.77003	6.86109	0.0120004	0.165985
ENSMUSG00000039202	ENSMUSG00000039202	54608	Abhd2	abhydrolase domain containing 2	-0.727709	6.69974	6.94348	0.0121187	0.167406
ENSMUSG00000043987	ENSMUSG00000043987	214552	Cep164	centrosomal protein 164	0.499589	3.11385	6.83651	0.0121439	0.167539
ENSMUSG00000044583	ENSMUSG00000044583	170743	Tlr7	toll-like receptor 7	-1.28796	1.14443	6.82415	0.0122167	0.168294
ENSMUSG00000036893	ENSMUSG00000036893	77683	Ehmt1	euchromatic histone methyltransferase 1	0.308406	4.84517	6.81988	0.0122419	0.168294
ENSMUSG00000026781	ENSMUSG00000026781	74159	Acbd5	acyl-Coenzyme A binding domain containing 5	0.298113	7.22541	6.8183	0.0122513	0.168294
ENSMUSG00000036820	ENSMUSG00000036820	245847	Amdhd2	amidohydrolase domain containing 2	-0.512606	3.90044	6.80945	0.0123039	0.168294
ENSMUSG00000022159	ENSMUSG00000022159	76338	Rab2b	RAB2B, member RAS oncogene family	0.861351	1.95833	6.80724	0.0123171	0.168294
ENSMUSG00000028484	ENSMUSG00000028484	101739	Psip1	PC4 and SFRS1 interacting protein 1	0.363871	4.70527	6.8068	0.0123197	0.168294
ENSMUSG00000040158	ENSMUSG00000040158	76281	Tax1bp3	Tax1 (human T cell leukemia virus type I) binding protein 3	-0.552788	3.54867	6.80652	0.0123214	0.168294
ENSMUSG00000029599	ENSMUSG00000029599	71990	Ddx54	DEAD (Asp-Glu-Ala-Asp) box polypeptide 54	0.429092	3.90779	6.80553	0.0123273	0.168294
ENSMUSG00000034220	ENSMUSG00000034220	14733	Gpc1	glypican 1	-0.565512	4.99719	6.8336	0.0123394	0.168294
ENSMUSG00000052684	ENSMUSG00000052684	16476	Jun	jun proto-oncogene	-0.739519	4.42139	6.86662	0.0123687	0.168409
ENSMUSG00000056153	ENSMUSG00000056153	54607	Socs6	suppressor of cytokine signaling 6	0.425137	3.34112	6.79583	0.0123854	0.168409
ENSMUSG00000030359	ENSMUSG00000030359	11287	Pzp	PZP, alpha-2-macroglobulin like	0.29056	10.9573	6.79426	0.0123948	0.168409
ENSMUSG00000032601	ENSMUSG00000032601	19087	Prkar2a	protein kinase, cAMP dependent regulatory, type II alpha	0.247633	6.71416	6.78363	0.0124588	0.169065
ENSMUSG00000091512	ENSMUSG00000091512	56692	Lamtor3	late endosomal/lysosomal adaptor, MAPK and MTOR activator 3	-0.374004	4.30553	6.77559	0.0125074	0.169512
ENSMUSG00000030315	ENSMUSG00000030315	232334	Vgll4	vestigial like family member 4	0.516361	4.3664	6.77167	0.0125312	0.169621
ENSMUSG00000031453	ENSMUSG00000031453	19414	Rasa3	RAS p21 protein activator 3	-0.394662	3.46754	6.76641	0.0125633	0.169674
ENSMUSG00000025351	ENSMUSG00000025351	12512	Cd63	CD63 antigen	-1.34768	4.71284	6.90193	0.0125817	0.169674
ENSMUSG00000071866	ENSMUSG00000071866	268373	Ppia	peptidylprolyl isomerase A	-0.426177	8.94119	6.76325	0.0125825	0.169674
ENSMUSG00000024943	ENSMUSG00000024943	226026	Smc5	structural maintenance of chromosomes 5	0.38202	3.72479	6.75852	0.0126114	0.169695
ENSMUSG00000055839	ENSMUSG00000055839	67673	Elob	elongin B	-0.249469	6.67586	6.75784	0.0126155	0.169695
ENSMUSG00000030352	ENSMUSG00000030352	109246	Tspan9	tetraspanin 9	0.45566	4.06115	6.75329	0.0126434	0.1698
ENSMUSG00000049382	ENSMUSG00000049382	16691	Krt8	keratin 8	-0.528137	7.1002	6.79105	0.0126554	0.1698
ENSMUSG00000036499	ENSMUSG00000036499	216238	Eea1	early endosome antigen 1	0.341434	5.87376	6.74834	0.0126738	0.1698
ENSMUSG00000063931	ENSMUSG00000063931	18624	Pepd	peptidase D	-0.338743	4.79947	6.74618	0.0126871	0.1698
ENSMUSG00000017344	ENSMUSG00000017344	22370	Vtn	vitronectin	0.293204	10.2506	6.73944	0.0127287	0.1698
ENSMUSG00000031004	ENSMUSG00000031004	17345	Mki67	antigen identified by monoclonal antibody Ki 67	-1.25394	1.74515	6.74701	0.0127337	0.1698
ENSMUSG00000025869	ENSMUSG00000025869	28126	Nop16	NOP16 nucleolar protein	0.355612	4.38977	6.73861	0.0127338	0.1698
ENSMUSG00000037519	ENSMUSG00000037519	233977	Ppfia1	protein tyrosine phosphatase, receptor type, f polypeptide (PTPRF), interacting protein (liprin), alpha 1	0.364425	4.39865	6.73112	0.0127802	0.170094
ENSMUSG00000026019	ENSMUSG00000026019	57750	Wdr12	WD repeat domain 12	0.399116	4.26642	6.729	0.0127933	0.170094
ENSMUSG00000029816	ENSMUSG00000029816	93695	Gpnmb	glycoprotein (transmembrane) nmb	-2.86613	2.29838	6.86378	0.0128033	0.170094
ENSMUSG00000063524	ENSMUSG00000063524	13806	Eno1	enolase 1, alpha non-neuron	-0.356109	7.64673	6.71791	0.0128624	0.170669
ENSMUSG00000028557	ENSMUSG00000028557	29864	Rnf11	ring finger protein 11	-0.497232	6.57383	6.73615	0.0129162	0.171172
ENSMUSG00000016181	ENSMUSG00000016181	215193	Utp25	UTP25 small subunit processome component	0.579863	2.76047	6.69055	0.0130345	0.172527
ENSMUSG00000027111	ENSMUSG00000027111	16403	Itga6	integrin alpha 6	-0.89016	2.15703	6.68124	0.0130937	0.172971
ENSMUSG00000074738	ENSMUSG00000074738	230991	Fndc10	fibronectin type III domain containing 10	-1.49594	1.20906	6.6867	0.0131055	0.172971
ENSMUSG00000019368	ENSMUSG00000019368	103655	Sec14l4	SEC14-like lipid binding 4	0.335835	7.3287	6.67769	0.0131163	0.172971
ENSMUSG00000054404	ENSMUSG00000054404	327978	Slfn5	schlafen 5	-0.529626	3.68678	6.67453	0.0131365	0.173026
ENSMUSG00000031570	ENSMUSG00000031570	71910	Plpp5	phospholipid phosphatase 5	-0.509153	3.29737	6.65379	0.0132697	0.174018
ENSMUSG00000001473	ENSMUSG00000001473	67951	Tubb6	tubulin, beta 6 class V	-0.961389	2.81989	6.68797	0.0132717	0.174018
ENSMUSG00000072596	ENSMUSG00000072596	13587	Ear2	eosinophil-associated, ribonuclease A family, member 2	-0.920555	2.34642	6.65095	0.0132881	0.174018
ENSMUSG00000021595	ENSMUSG00000021595	28114	Nsun2	NOL1/NOP2/Sun domain family member 2	0.394994	5.37894	6.65065	0.01329	0.174018
ENSMUSG00000040234	ENSMUSG00000040234	67623	Tm7sf3	transmembrane 7 superfamily member 3	-0.415853	6.26812	6.65023	0.0132927	0.174018
ENSMUSG00000032249	ENSMUSG00000032249	11737	Anp32a	acidic (leucine-rich) nuclear phosphoprotein 32 family, member A	0.424744	6.3991	6.64408	0.0133326	0.174328
ENSMUSG00000105987	ENSMUSG00000105987	433855	AI506816	expressed sequence AI506816	-1.4492	1.57205	6.65857	0.0133913	0.174618
ENSMUSG00000021222	ENSMUSG00000021222	73828	Dcaf4	DDB1 and CUL4 associated factor 4	-0.807307	1.43541	6.63249	0.0134081	0.174618
ENSMUSG00000029063	ENSMUSG00000029063	192185	Nadk	NAD kinase	-0.451218	6.44925	6.63428	0.0134435	0.174618
ENSMUSG00000060450	ENSMUSG00000060450	56736	Rnf14	ring finger protein 14	-0.273393	5.49151	6.62692	0.0134445	0.174618
ENSMUSG00000023070	ENSMUSG00000023070	19733	Rgn	regucalcin	0.410558	9.41621	6.6267	0.0134459	0.174618
ENSMUSG00000028469	ENSMUSG00000028469	230103	Npr2	natriuretic peptide receptor 2	0.58559	5.19775	6.6689	0.0134521	0.174618
ENSMUSG00000028437	ENSMUSG00000028437	67123	Ubap1	ubiquitin-associated protein 1	-0.359825	4.60728	6.61889	0.0134972	0.174992
ENSMUSG00000019935	ENSMUSG00000019935	216227	Slc17a8	solute carrier family 17 (sodium-dependent inorganic phosphate cotransporter), member 8	0.514679	4.58015	6.61606	0.0135199	0.175076
ENSMUSG00000055067	ENSMUSG00000055067	69726	Smyd3	SET and MYND domain containing 3	-0.605505	2.36285	6.61113	0.0135483	0.175105
ENSMUSG00000028906	ENSMUSG00000028906	269587	Epb41	erythrocyte membrane protein band 4.1	0.374446	5.8854	6.61016	0.0135547	0.175105
ENSMUSG00000030483	ENSMUSG00000030483	13088	Cyp2b10	cytochrome P450, family 2, subfamily b, polypeptide 10	-1.68931	0.929935	6.62476	0.0135959	0.175236
ENSMUSG00000026580	ENSMUSG00000026580	20344	Selp	selectin, platelet	-1.25216	1.16072	6.60371	0.0135974	0.175236
ENSMUSG00000029192	ENSMUSG00000029192	100855	Tbc1d14	TBC1 domain family, member 14	-0.619922	2.83071	6.58751	0.0137053	0.176414
ENSMUSG00000037053	ENSMUSG00000037053	12007	Azgp1	alpha-2-glycoprotein 1, zinc	0.32231	9.86599	6.58382	0.0137299	0.176521
ENSMUSG00000021939	ENSMUSG00000021939	13030	Ctsb	cathepsin B	-0.306063	8.63189	6.57907	0.0137618	0.176632
ENSMUSG00000030313	ENSMUSG00000030313	320560	Dennd5b	DENN/MADD domain containing 5B	0.264042	6.35944	6.5754	0.0137864	0.176632
ENSMUSG00000004473	ENSMUSG00000004473	20256	Clec11a	C-type lectin domain family 11, member a	-0.663577	2.24332	6.5752	0.0137878	0.176632
ENSMUSG00000047963	ENSMUSG00000047963	52331	Stbd1	starch binding domain 1	-0.436757	5.21805	6.57059	0.0138188	0.176657
ENSMUSG00000031503	ENSMUSG00000031503	12827	Col4a2	collagen, type IV, alpha 2	-0.528127	4.06648	6.57003	0.0138226	0.176657
ENSMUSG00000021900	ENSMUSG00000021900	26363	Btd	biotinidase	0.316478	4.91349	6.54925	0.0139636	0.178247
ENSMUSG00000032359	ENSMUSG00000032359	13036	Ctsh	cathepsin H	0.228697	8.32071	6.53429	0.014066	0.179171
ENSMUSG00000022139	ENSMUSG00000022139	105559	Mbnl2	muscleblind like splicing factor 2	-0.318876	6.2864	6.53381	0.0140693	0.179171
ENSMUSG00000032388	ENSMUSG00000032388	27965	Spg21	SPG21, maspardin	-0.328669	4.7933	6.52765	0.0141117	0.179499
ENSMUSG00000038811	ENSMUSG00000038811	14710	Gngt2	guanine nucleotide binding protein (G protein), gamma transducing activity polypeptide 2	-0.578552	3.24744	6.51987	0.0141655	0.179649
ENSMUSG00000022000	ENSMUSG00000022000	67302	Zc3h13	zinc finger CCCH type containing 13	0.362619	4.97287	6.51886	0.0141725	0.179649
ENSMUSG00000039533	ENSMUSG00000039533	75104	Mmd2	monocyte to macrophage differentiation-associated 2	-0.958925	2.88098	6.55919	0.0141736	0.179649
ENSMUSG00000034820	ENSMUSG00000034820	269061	Cpsf7	cleavage and polyadenylation specific factor 7	0.354403	3.96188	6.51292	0.0142137	0.179945
ENSMUSG00000058715	ENSMUSG00000058715	14127	Fcer1g	Fc receptor, IgE, high affinity I, gamma polypeptide	-0.784969	4.302	6.57815	0.0142558	0.180266
ENSMUSG00000044468	ENSMUSG00000044468	74645	Tent5c	terminal nucleotidyltransferase 5C	0.568921	3.01684	6.5	0.0143038	0.180661
ENSMUSG00000030341	ENSMUSG00000030341	21937	Tnfrsf1a	tumor necrosis factor receptor superfamily, member 1a	-0.244736	6.0878	6.47917	0.0144503	0.182016
ENSMUSG00000005982	ENSMUSG00000005982	74763	Naa60	N(alpha)-acetyltransferase 60, NatF catalytic subunit	0.386284	6.02372	6.47904	0.0144513	0.182016
ENSMUSG00000026960	ENSMUSG00000026960	65103	Arl6ip6	ADP-ribosylation factor-like 6 interacting protein 6	0.585847	2.60243	6.47349	0.0144906	0.182016
ENSMUSG00000020659	ENSMUSG00000020659	104836	Cbll1	Casitas B-lineage lymphoma-like 1	0.326379	3.85227	6.47325	0.0144923	0.182016
ENSMUSG00000042572	ENSMUSG00000042572	70093	Ube2q1	ubiquitin-conjugating enzyme E2Q family member 1	-0.319979	5.33354	6.47183	0.0145024	0.182016
ENSMUSG00000034108	ENSMUSG00000034108	12460	Ccs	copper chaperone for superoxide dismutase	0.311035	7.20605	6.46804	0.0145293	0.182016
ENSMUSG00000019853	ENSMUSG00000019853	56016	Hebp2	heme binding protein 2	-1.58014	0.732881	6.46802	0.0145295	0.182016
ENSMUSG00000099083	ENSMUSG00000099083	223922	Atf7	activating transcription factor 7	0.479757	3.50068	6.46281	0.0145666	0.182269
ENSMUSG00000046574	ENSMUSG00000046574	233210	Prr12	proline rich 12	0.577433	3.13231	6.45591	0.0146159	0.182398
ENSMUSG00000034203	ENSMUSG00000034203	72170	Chchd4	coiled-coil-helix-coiled-coil-helix domain containing 4	-0.415273	4.21931	6.45479	0.0146239	0.182398
ENSMUSG00000040481	ENSMUSG00000040481	207165	Bptf	bromodomain PHD finger transcription factor	0.273944	6.16187	6.45425	0.0146278	0.182398
ENSMUSG00000020740	ENSMUSG00000020740	260302	Gga3	golgi associated, gamma adaptin ear containing, ARF binding protein 3	0.541899	2.51337	6.4509	0.0146518	0.182487
ENSMUSG00000032369	ENSMUSG00000032369	22038	Plscr1	phospholipid scramblase 1	-1.25015	3.40952	6.54722	0.0147142	0.182894
ENSMUSG00000038188	ENSMUSG00000038188	380713	Scarf1	scavenger receptor class F, member 1	-0.83498	2.34287	6.44163	0.0147185	0.182894
ENSMUSG00000024769	ENSMUSG00000024769	240505	Cdc42bpg	CDC42 binding protein kinase gamma (DMPK-like)	-0.614346	3.1544	6.43438	0.014771	0.183334
ENSMUSG00000023992	ENSMUSG00000023992	83433	Trem2	triggering receptor expressed on myeloid cells 2	-1.71467	1.12143	6.45273	0.0148261	0.183807
ENSMUSG00000043154	ENSMUSG00000043154	235542	Ppp2r3a	protein phosphatase 2, regulatory subunit B'', alpha	0.463827	4.15652	6.41992	0.0148761	0.184213
ENSMUSG00000021466	ENSMUSG00000021466	19206	Ptch1	patched 1	0.45024	3.85995	6.41635	0.0149021	0.184324
ENSMUSG00000022037	ENSMUSG00000022037	12759	Clu	clusterin	0.271459	10.4022	6.41087	0.0149423	0.184579
ENSMUSG00000028106	ENSMUSG00000028106	75137	Rprd2	regulation of nuclear pre-mRNA domain containing 2	0.300314	4.11445	6.40817	0.0149621	0.184579
ENSMUSG00000022141	ENSMUSG00000022141	71175	Nipbl	NIPBL cohesin loading factor	0.259403	6.37385	6.40386	0.0149937	0.184579
ENSMUSG00000024118	ENSMUSG00000024118	72016	Tedc2	tubulin epsilon and delta complex 2	0.539384	5.18281	6.43159	0.0150027	0.184579
ENSMUSG00000024352	ENSMUSG00000024352	71242	Spata24	spermatogenesis associated 24	-0.957834	1.64164	6.40175	0.0150093	0.184579
ENSMUSG00000027536	ENSMUSG00000027536	66371	Chmp4c	charged multivesicular body protein 4C	-1.21403	1.0457	6.39783	0.0150383	0.184579
ENSMUSG00000028630	ENSMUSG00000028630	69181	Dyrk2	dual-specificity tyrosine-(Y)-phosphorylation regulated kinase 2	0.311033	6.16842	6.39278	0.0150756	0.184579
ENSMUSG00000000915	ENSMUSG00000000915	29816	Hip1r	huntingtin interacting protein 1 related	0.538917	3.33745	6.38775	0.0151129	0.184579
ENSMUSG00000042506	ENSMUSG00000042506	216825	Usp22	ubiquitin specific peptidase 22	-0.368611	5.18605	6.38454	0.0151367	0.184579
ENSMUSG00000018387	ENSMUSG00000018387	71774	Shroom1	shroom family member 1	0.406498	4.06006	6.38402	0.0151406	0.184579
ENSMUSG00000029634	ENSMUSG00000029634	74132	Rnf6	ring finger protein (C3H2C3 type) 6	0.394814	4.88461	6.38297	0.0151484	0.184579
ENSMUSG00000025014	ENSMUSG00000025014	21673	Dntt	deoxynucleotidyltransferase, terminal	-0.723633	2.75314	6.38098	0.0151632	0.184579
ENSMUSG00000003360	ENSMUSG00000003360	74351	Ddx23	DEAD (Asp-Glu-Ala-Asp) box polypeptide 23	0.488148	2.96247	6.38073	0.015165	0.184579
ENSMUSG00000025178	ENSMUSG00000025178	84095	Pi4k2a	phosphatidylinositol 4-kinase type 2 alpha	0.304746	5.40904	6.37904	0.0151776	0.184579
ENSMUSG00000032690	ENSMUSG00000032690	246728	Oas2	2'-5' oligoadenylate synthetase 2	-1.24151	1.12214	6.37672	0.0151949	0.184579
ENSMUSG00000009647	ENSMUSG00000009647	215999	Mcu	mitochondrial calcium uniporter	0.451217	4.81442	6.37642	0.0151972	0.184579
ENSMUSG00000048186	ENSMUSG00000048186	209645	Bend7	BEN domain containing 7	0.488775	3.68675	6.3663	0.0152729	0.185175
ENSMUSG00000011752	ENSMUSG00000011752	18648	Pgam1	phosphoglycerate mutase 1	-0.288255	7.81464	6.36527	0.0152807	0.185175
ENSMUSG00000035632	ENSMUSG00000035632	232791	Cnot3	CCR4-NOT transcription complex, subunit 3	0.387098	4.8064	6.36126	0.0153108	0.185331
ENSMUSG00000021928	ENSMUSG00000021928	68177	Ebpl	emopamil binding protein-like	-0.340925	7.72567	6.35636	0.0153477	0.185444
ENSMUSG00000044469	ENSMUSG00000044469	66443	Tnfaip8l1	tumor necrosis factor, alpha-induced protein 8-like 1	0.384782	5.49615	6.35517	0.0153567	0.185444
ENSMUSG00000022883	ENSMUSG00000022883	19876	Robo1	roundabout guidance receptor 1	-0.949241	2.18837	6.35318	0.0153718	0.185444
ENSMUSG00000005233	ENSMUSG00000005233	66442	Spc25	SPC25, NDC80 kinetochore complex component, homolog (S. cerevisiae)	-0.580094	3.41911	6.34924	0.0154016	0.185579
ENSMUSG00000026637	ENSMUSG00000026637	22033	Traf5	TNF receptor-associated factor 5	-0.54928	2.7542	6.34714	0.0154175	0.185579
ENSMUSG00000040963	ENSMUSG00000040963	11890	Asgr2	asialoglycoprotein receptor 2	0.292881	6.88154	6.34244	0.0154531	0.1858
ENSMUSG00000066415	ENSMUSG00000066415	77853	Msl2	MSL complex subunit 2	0.302774	4.31544	6.33594	0.0155026	0.186187
ENSMUSG00000038668	ENSMUSG00000038668	14745	Lpar1	lysophosphatidic acid receptor 1	-0.984471	1.79921	6.32798	0.0155635	0.186473
ENSMUSG00000052520	ENSMUSG00000052520	13109	Cyp2j5	cytochrome P450, family 2, subfamily j, polypeptide 5	0.41424	9.43632	6.32586	0.0155797	0.186473
ENSMUSG00000041229	ENSMUSG00000041229	320595	Phf8	PHD finger protein 8	0.518577	3.01084	6.32314	0.0156006	0.186473
ENSMUSG00000028434	ENSMUSG00000028434	54357	Epb41l4b	erythrocyte membrane protein band 4.1 like 4b	0.477842	5.68193	6.33759	0.0156024	0.186473
ENSMUSG00000018501	ENSMUSG00000018501	20185	Ncor1	nuclear receptor co-repressor 1	0.267687	7.95917	6.32151	0.0156131	0.186473
ENSMUSG00000022811	ENSMUSG00000022811	22661	Zfp148	zinc finger protein 148	0.272765	5.38177	6.31633	0.015653	0.186742
ENSMUSG00000026837	ENSMUSG00000026837	12831	Col5a1	collagen, type V, alpha 1	-0.793745	3.14112	6.33011	0.015716	0.18684
ENSMUSG00000030652	ENSMUSG00000030652	12850	Coq7	demethyl-Q 7	-0.334668	5.01566	6.30566	0.0157354	0.18684
ENSMUSG00000044749	ENSMUSG00000044749	76184	Abca6	ATP-binding cassette, sub-family A (ABC1), member 6	0.249213	5.62601	6.30489	0.0157414	0.18684
ENSMUSG00000035093	ENSMUSG00000035093	70354	Secisbp2l	SECIS binding protein 2-like	-0.279191	5.95407	6.30323	0.0157543	0.18684
ENSMUSG00000050989	ENSMUSG00000050989	74777	Selenon	selenoprotein N	-0.881962	0.824713	6.30192	0.0157644	0.18684
ENSMUSG00000033083	ENSMUSG00000033083	210789	Tbc1d4	TBC1 domain family, member 4	-0.63967	2.63538	6.30125	0.0157696	0.18684
ENSMUSG00000030562	ENSMUSG00000030562	50490	Nox4	NADPH oxidase 4	0.506181	5.02792	6.31337	0.0157827	0.18684
ENSMUSG00000018672	ENSMUSG00000018672	56358	Copz2	coatomer protein complex, subunit zeta 2	-0.519984	3.3865	6.29157	0.015845	0.187372
ENSMUSG00000024145	ENSMUSG00000024145	18701	Pigf	phosphatidylinositol glycan anchor biosynthesis, class F	-0.649493	1.66445	6.28549	0.0158925	0.187727
ENSMUSG00000019838	ENSMUSG00000019838	72472	Slc16a10	solute carrier family 16 (monocarboxylic acid transporters), member 10	0.46466	5.35121	6.28483	0.0159385	0.187802
ENSMUSG00000015112	ENSMUSG00000015112	50799	Slc25a13	solute carrier family 25 (mitochondrial carrier, adenine nucleotide translocator), member 13	0.265767	7.71153	6.2786	0.0159466	0.187802
ENSMUSG00000037331	ENSMUSG00000037331	73158	Larp1	La ribonucleoprotein domain family, member 1	0.366595	7.06205	6.27802	0.0159512	0.187802
ENSMUSG00000029304	ENSMUSG00000029304	20750	Spp1	secreted phosphoprotein 1	-1.2362	4.86001	6.39225	0.0159962	0.187929
ENSMUSG00000026728	ENSMUSG00000026728	22352	Vim	vimentin	-0.866844	5.19169	6.37218	0.0159969	0.187929
ENSMUSG00000026473	ENSMUSG00000026473	14645	Glul	glutamate-ammonia ligase (glutamine synthetase)	-0.486769	9.68715	6.28333	0.0160233	0.188033
ENSMUSG00000069495	ENSMUSG00000069495	227867	Epc2	enhancer of polycomb homolog 2	0.338012	4.10019	6.26494	0.0160544	0.188062
ENSMUSG00000026048	ENSMUSG00000026048	22592	Ercc5	excision repair cross-complementing rodent repair deficiency, complementation group 5	0.445988	3.72066	6.26415	0.0160606	0.188062
ENSMUSG00000039016	ENSMUSG00000039016	30057	Timm8b	translocase of inner mitochondrial membrane 8B	-0.3508	6.29251	6.26048	0.0160897	0.188197
ENSMUSG00000045991	ENSMUSG00000045991	225631	Onecut2	one cut domain, family member 2	0.276839	8.194	6.25456	0.0161368	0.188543
ENSMUSG00000030225	ENSMUSG00000030225	232449	Dera	deoxyribose-phosphate aldolase (putative)	-0.269556	5.65818	6.24515	0.0162119	0.189093
ENSMUSG00000040651	ENSMUSG00000040651	218850	Tasor	transcription activation suppressor	0.428033	4.53618	6.24309	0.0162284	0.189093
ENSMUSG00000078435	ENSMUSG00000078435	216177	AU041133	expressed sequence AU041133	0.985778	0.940614	6.2386	0.0162644	0.189093
ENSMUSG00000025856	ENSMUSG00000025856	18590	Pdgfa	platelet derived growth factor, alpha	-0.465324	4.52737	6.23758	0.0162726	0.189093
ENSMUSG00000057054	ENSMUSG00000057054	103844	Inca1	inhibitor of CDK, cyclin A1 interacting protein 1	0.510918	4.53886	6.24021	0.0162891	0.189093
ENSMUSG00000029994	ENSMUSG00000029994	11746	Anxa4	annexin A4	-0.317325	4.75314	6.2355	0.0162893	0.189093
ENSMUSG00000042790	ENSMUSG00000042790	235315	Rnf214	ring finger protein 214	0.40961	4.41869	6.23283	0.0163108	0.189139
ENSMUSG00000000031	ENSMUSG00000000031	14955	H19	H19, imprinted maternally expressed transcript	-2.2597	1.48557	6.31829	0.0163625	0.189331
ENSMUSG00000032376	ENSMUSG00000032376	235441	Usp3	ubiquitin specific peptidase 3	0.365805	4.26068	6.22641	0.0163626	0.189331
ENSMUSG00000090231	ENSMUSG00000090231	14962	Cfb	complement factor B	0.695301	3.29201	6.22189	0.0164837	0.190397
ENSMUSG00000063929	ENSMUSG00000063929	100040843	Cyp4a32	cytochrome P450, family 4, subfamily a, polypeptide 32	1.16079	1.16009	6.2107	0.0164901	0.190397
ENSMUSG00000060317	ENSMUSG00000060317	209186	Acnat2	acyl-coenzyme A amino acid N-acyltransferase 2	-0.671369	4.50414	6.25773	0.016531	0.190472
ENSMUSG00000047492	ENSMUSG00000047492	16326	Inhbe	inhibin beta-E	-0.53707	5.88481	6.24384	0.016532	0.190472
ENSMUSG00000029998	ENSMUSG00000029998	66881	Pcyox1	prenylcysteine oxidase 1	-0.417958	6.265	6.19819	0.0165923	0.190962
ENSMUSG00000026874	ENSMUSG00000026874	15139	Hc	hemolytic complement	0.255657	8.13394	6.19421	0.016625	0.191134
ENSMUSG00000025366	ENSMUSG00000025366	23943	Esyt1	extended synaptotagmin-like protein 1	-0.488719	3.9298	6.1915	0.0166473	0.191186
ENSMUSG00000037296	ENSMUSG00000037296	67207	Lsm1	LSM1 homolog, mRNA degradation associated	-0.462728	3.50085	6.18544	0.0166973	0.191471
ENSMUSG00000037514	ENSMUSG00000037514	74450	Pank2	pantothenate kinase 2	-0.423653	3.92955	6.18418	0.0167076	0.191471
ENSMUSG00000026664	ENSMUSG00000026664	16922	Phyh	phytanoyl-CoA hydroxylase	0.315193	10.1477	6.17118	0.0168154	0.192069
ENSMUSG00000000325	ENSMUSG00000000325	11877	Arvcf	armadillo repeat gene deleted in velocardiofacial syndrome	-0.746299	2.16686	6.1709	0.0168178	0.192069
ENSMUSG00000031278	ENSMUSG00000031278	50790	Acsl4	acyl-CoA synthetase long-chain family member 4	-0.527646	5.4282	6.19814	0.0168242	0.192069
ENSMUSG00000037960	ENSMUSG00000037960	68480	Card19	caspase recruitment domain family, member 19	-0.423697	3.6087	6.16532	0.0168643	0.192069
ENSMUSG00000037731	ENSMUSG00000037731	230787	Themis2	thymocyte selection associated family member 2	-0.950113	1.59999	6.16313	0.0168826	0.192069
ENSMUSG00000025764	ENSMUSG00000025764	269424	Jade1	jade family PHD finger 1	0.303621	5.91425	6.16191	0.0168927	0.192069
ENSMUSG00000015711	ENSMUSG00000015711	229589	Prune1	prune exopolyphosphatase	-0.484885	4.95277	6.16595	0.0169005	0.192069
ENSMUSG00000025044	ENSMUSG00000025044	20288	Msr1	macrophage scavenger receptor 1	-0.554179	3.11324	6.1597	0.0169112	0.192069
ENSMUSG00000023505	ENSMUSG00000023505	14793	Cdca3	cell division cycle associated 3	-1.30597	1.39062	6.16004	0.0169238	0.192069
ENSMUSG00000025037	ENSMUSG00000025037	17161	Maoa	monoamine oxidase A	-0.697295	2.20861	6.15566	0.0169451	0.192069
ENSMUSG00000027956	ENSMUSG00000027956	70652	Tmem144	transmembrane protein 144	-0.625185	3.09825	6.15434	0.0169562	0.192069
ENSMUSG00000030894	ENSMUSG00000030894	12751	Tpp1	tripeptidyl peptidase I	-0.318945	7.08512	6.14966	0.0169955	0.192287
ENSMUSG00000022094	ENSMUSG00000022094	213053	Slc39a14	solute carrier family 39 (zinc transporter), member 14	0.412004	5.42201	6.1478	0.0170112	0.192287
ENSMUSG00000043008	ENSMUSG00000043008	239743	Klhl6	kelch-like 6	-0.821377	1.60343	6.14445	0.0170394	0.192404
ENSMUSG00000059481	ENSMUSG00000059481	18815	Plg	plasminogen	0.371004	10.4329	6.13499	0.0171194	0.192986
ENSMUSG00000014668	ENSMUSG00000014668	231600	Chfr	checkpoint with forkhead and ring finger domains	0.341467	3.81783	6.13316	0.017135	0.192986
ENSMUSG00000024962	ENSMUSG00000024962	22340	Vegfb	vascular endothelial growth factor B	-0.48528	4.50579	6.13016	0.0171605	0.192986
ENSMUSG00000062646	ENSMUSG00000062646	76051	Ganc	glucosidase, alpha; neutral C	0.32506	5.22519	6.1299	0.0171627	0.192986
ENSMUSG00000028345	ENSMUSG00000028345	269536	Tex10	testis expressed gene 10	0.492961	2.44386	6.11719	0.0172711	0.194003
ENSMUSG00000039046	ENSMUSG00000039046	98910	Usp6nl	USP6 N-terminal like	0.409618	3.3515	6.11177	0.0173176	0.194322
ENSMUSG00000024805	ENSMUSG00000024805	76073	Pcgf5	polycomb group ring finger 5	0.33254	4.57822	6.10577	0.0173692	0.194661
ENSMUSG00000073412	ENSMUSG00000073412	16988	Lst1	leukocyte specific transcript 1	-0.904619	2.26637	6.10341	0.0173896	0.194661
ENSMUSG00000035765	ENSMUSG00000035765	69190	Dym	dymeclin	0.529405	4.47563	6.11151	0.0174021	0.194661
ENSMUSG00000054008	ENSMUSG00000054008	15531	Ndst1	N-deacetylase/N-sulfotransferase (heparan glucosaminyl) 1	0.286353	7.74411	6.09528	0.0174598	0.194983
ENSMUSG00000008604	ENSMUSG00000008604	94232	Ubqln4	ubiquilin 4	0.379115	3.68091	6.09276	0.0174817	0.194983
ENSMUSG00000032392	ENSMUSG00000032392	214424	Parp16	poly (ADP-ribose) polymerase family, member 16	-0.600306	3.83805	6.1024	0.0174853	0.194983
ENSMUSG00000055239	ENSMUSG00000055239	74287	Kcmf1	potassium channel modulatory factor 1	0.215675	5.57011	6.08573	0.0175428	0.195422
ENSMUSG00000025481	ENSMUSG00000025481	76974	Urah	urate (5-hydroxyiso-) hydrolase	0.396856	8.05523	6.07876	0.0176035	0.195896
ENSMUSG00000026796	ENSMUSG00000026796	227737	Fam129b	family with sequence similarity 129, member B	-0.672624	3.03222	6.07342	0.0176503	0.196063
ENSMUSG00000028053	ENSMUSG00000028053	192195	Ash1l	ASH1 like histone lysine methyltransferase	0.293998	6.17115	6.07289	0.017655	0.196063
ENSMUSG00000002602	ENSMUSG00000002602	26362	Axl	AXL receptor tyrosine kinase	-0.574858	4.50303	6.09289	0.0176769	0.196104
ENSMUSG00000022477	ENSMUSG00000022477	11429	Aco2	aconitase 2, mitochondrial	-0.300638	7.20853	6.06695	0.0177071	0.196237
ENSMUSG00000090101	ENSMUSG00000090101	73474	Snhg9	small nucleolar RNA host gene 9	0.358696	5.65118	6.06458	0.0177279	0.196266
ENSMUSG00000031613	ENSMUSG00000031613	15446	Hpgd	hydroxyprostaglandin dehydrogenase 15 (NAD)	0.523203	5.30348	6.08876	0.0177532	0.196343
ENSMUSG00000042705	ENSMUSG00000042705	69456	Commd10	COMM domain containing 10	-0.646493	2.88371	6.0573	0.0177922	0.196572
ENSMUSG00000026932	ENSMUSG00000026932	67991	Nacc2	nucleus accumbens associated 2, BEN and BTB (POZ) domain containing	0.323481	5.21949	6.05458	0.0178162	0.196636
ENSMUSG00000036501	ENSMUSG00000036501	225358	Fam13b	family with sequence similarity 13, member B	0.515467	3.39561	6.05025	0.0178546	0.196698
ENSMUSG00000020467	ENSMUSG00000020467	216616	Efemp1	epidermal growth factor-containing fibulin-like extracellular matrix protein 1	-0.647756	2.32901	6.04733	0.0178805	0.196698
ENSMUSG00000022788	ENSMUSG00000022788	224014	Fgd4	FYVE, RhoGEF and PH domain containing 4	0.385462	3.8424	6.04478	0.0179032	0.196698
ENSMUSG00000036403	ENSMUSG00000036403	381644	Cep135	centrosomal protein 135	0.664346	2.71107	6.0429	0.0179199	0.196698
ENSMUSG00000014601	ENSMUSG00000014601	229707	Strip1	striatin interacting protein 1	0.340718	3.51764	6.04202	0.0179278	0.196698
ENSMUSG00000005198	ENSMUSG00000005198	20020	Polr2a	polymerase (RNA) II (DNA directed) polypeptide A	-0.26573	5.20117	6.04161	0.0179314	0.196698
ENSMUSG00000009549	ENSMUSG00000009549	20813	Srp14	signal recognition particle 14	-0.285377	5.8608	6.03633	0.0179785	0.197013
ENSMUSG00000031731	ENSMUSG00000031731	11765	Ap1g1	adaptor protein complex AP-1, gamma 1 subunit	0.215776	5.6254	6.02693	0.0180628	0.197382
ENSMUSG00000032599	ENSMUSG00000032599	76500	Ip6k2	inositol hexaphosphate kinase 2	0.404639	4.60068	6.02671	0.0180648	0.197382
ENSMUSG00000039047	ENSMUSG00000039047	329777	Pigk	phosphatidylinositol glycan anchor biosynthesis, class K	-0.292112	4.30256	6.02526	0.0180778	0.197382
ENSMUSG00000030588	ENSMUSG00000030588	77254	Yif1b	Yip1 interacting factor homolog B (S. cerevisiae)	0.352715	4.69812	6.02239	0.0181036	0.197382
ENSMUSG00000064373	ENSMUSG00000064373	20363	Selenop	selenoprotein P	-0.323582	11.8728	6.02236	0.0181039	0.197382
ENSMUSG00000029032	ENSMUSG00000029032	230972	Arhgef16	Rho guanine nucleotide exchange factor (GEF) 16	-1.0295	1.42336	6.01552	0.0181657	0.197554
ENSMUSG00000052926	ENSMUSG00000052926	69724	Rnaseh2a	ribonuclease H2, large subunit	-0.462246	3.85417	6.01269	0.0181912	0.197554
ENSMUSG00000078584	ENSMUSG00000078584	230696	AU022252	expressed sequence AU022252	0.312751	5.76632	6.01078	0.0182085	0.197554
ENSMUSG00000035469	ENSMUSG00000035469	71330	Rcbtb1	regulator of chromosome condensation (RCC1) and BTB (POZ) domain containing protein 1	0.375975	5.30552	6.00805	0.0182333	0.197554
ENSMUSG00000032098	ENSMUSG00000032098	58866	Treh	trehalase (brush-border membrane glycoprotein)	-1.27977	1.00902	6.00738	0.0182394	0.197554
ENSMUSG00000026547	ENSMUSG00000026547	21346	Tagln2	transgelin 2	-0.772893	4.93568	6.08612	0.0182536	0.197554
ENSMUSG00000032212	ENSMUSG00000032212	66660	Sltm	SAFB-like, transcription modulator	0.231284	5.8659	6.0024	0.0182846	0.197554
ENSMUSG00000029910	ENSMUSG00000029910	56150	Mad2l1	MAD2 mitotic arrest deficient-like 1	-1.06682	1.52305	6.00167	0.0182912	0.197554
ENSMUSG00000022971	ENSMUSG00000022971	15976	Ifnar2	interferon (alpha and beta) receptor 2	0.324873	4.67064	6.00068	0.0183002	0.197554
ENSMUSG00000052336	ENSMUSG00000052336	13051	Cx3cr1	chemokine (C-X3-C motif) receptor 1	-1.5707	2.51737	6.09034	0.018304	0.197554
ENSMUSG00000046351	ENSMUSG00000046351	218100	Zfp322a	zinc finger protein 322A	0.318134	4.09506	5.99394	0.0183617	0.197554
ENSMUSG00000075284	ENSMUSG00000075284	215280	Wipf1	WAS/WASL interacting protein family, member 1	-0.584089	2.49719	5.99327	0.0183679	0.197554
ENSMUSG00000061979	ENSMUSG00000061979	94254	Rcc1l	reculator of chromosome condensation 1 like	0.374824	3.70369	5.99283	0.0183719	0.197554
ENSMUSG00000029655	ENSMUSG00000029655	381695	N4bp2l2	NEDD4 binding protein 2-like 2	0.246562	5.44442	5.99231	0.0183767	0.197554
ENSMUSG00000010911	ENSMUSG00000010911	56369	Apip	APAF1 interacting protein	-0.429726	3.83843	5.98724	0.0184231	0.197771
ENSMUSG00000020400	ENSMUSG00000020400	57783	Tnip1	TNFAIP3 interacting protein 1	-0.587309	3.5619	5.9861	0.0184336	0.197771
ENSMUSG00000003378	ENSMUSG00000003378	14809	Grik5	glutamate receptor, ionotropic, kainate 5 (gamma 2)	1.07607	0.83769	5.98056	0.0184845	0.198119
ENSMUSG00000004631	ENSMUSG00000004631	20392	Sgce	sarcoglycan, epsilon	-1.01199	2.18773	5.98578	0.0185292	0.198401
ENSMUSG00000029468	ENSMUSG00000029468	18439	P2rx7	purinergic receptor P2X, ligand-gated ion channel, 7	-0.890962	1.22883	5.97279	0.0185562	0.198493
ENSMUSG00000028289	ENSMUSG00000028289	13841	Epha7	Eph receptor A7	-0.852685	2.06663	5.96588	0.0186203	0.19898
ENSMUSG00000022521	ENSMUSG00000022521	12914	Crebbp	CREB binding protein	0.261337	6.07623	5.95862	0.0186878	0.199503
ENSMUSG00000049775	ENSMUSG00000049775	19241	Tmsb4x	thymosin, beta 4, X chromosome	-1.01227	7.44205	6.06472	0.0187157	0.199603
ENSMUSG00000038010	ENSMUSG00000038010	76138	Ccdc138	coiled-coil domain containing 138	0.896722	1.20949	5.94677	0.0187985	0.200288
ENSMUSG00000038611	ENSMUSG00000038611	101471	Phrf1	PHD and ring finger domains 1	0.43033	4.15616	5.94262	0.0188374	0.200372
ENSMUSG00000026743	ENSMUSG00000026743	17354	Mllt10	myeloid/lymphoid or mixed-lineage leukemia; translocated to, 10	0.357071	5.54244	5.94178	0.0188454	0.200372
ENSMUSG00000017754	ENSMUSG00000017754	18830	Pltp	phospholipid transfer protein	-0.780773	5.1888	6.01996	0.0188938	0.200372
ENSMUSG00000018965	ENSMUSG00000018965	22629	Ywhah	tyrosine 3-monooxygenase/tryptophan 5-monooxygenase activation protein, eta polypeptide	-0.374334	5.25821	5.93612	0.0188986	0.200372
ENSMUSG00000027330	ENSMUSG00000027330	12531	Cdc25b	cell division cycle 25B	-1.05757	1.03044	5.9352	0.0189074	0.200372
ENSMUSG00000029119	ENSMUSG00000029119	17160	Man2b2	mannosidase 2, alpha B2	-0.645099	2.29009	5.93387	0.0189199	0.200372
ENSMUSG00000033799	ENSMUSG00000033799	105203	Tasor2	transcription activation suppressor family member 2	0.568388	2.7171	5.93208	0.0189368	0.200372
ENSMUSG00000029366	ENSMUSG00000029366	13178	Dck	deoxycytidine kinase	-0.687086	1.46389	5.92587	0.0189956	0.200797
ENSMUSG00000015094	ENSMUSG00000015094	18146	Npdc1	neural proliferation, differentiation and control 1	-0.984658	2.16971	5.92748	0.0190355	0.200827
ENSMUSG00000020326	ENSMUSG00000020326	12450	Ccng1	cyclin G1	-0.403967	4.97358	5.92091	0.0190427	0.200827
ENSMUSG00000042349	ENSMUSG00000042349	56489	Ikbke	inhibitor of kappaB kinase epsilon	-0.601941	2.86138	5.91967	0.0190544	0.200827
ENSMUSG00000020716	ENSMUSG00000020716	18015	Nf1	neurofibromin 1	0.426297	3.5007	5.9177	0.0190732	0.200828
ENSMUSG00000022570	ENSMUSG00000022570	22122	Tsta3	tissue specific transplantation antigen P35B	0.300753	4.7508	5.91163	0.0191311	0.201242
ENSMUSG00000031659	ENSMUSG00000031659	11513	Adcy7	adenylate cyclase 7	-1.05845	1.46759	5.90913	0.019155	0.201296
ENSMUSG00000034430	ENSMUSG00000034430	80292	Zxdc	ZXD family zinc finger C	0.51997	3.24658	5.89789	0.0192629	0.202149
ENSMUSG00000034613	ENSMUSG00000034613	319468	Ppm1h	protein phosphatase 1H (PP2C domain containing)	-0.884517	1.25642	5.89677	0.0192737	0.202149
ENSMUSG00000039841	ENSMUSG00000039841	627049	Zfp800	zinc finger protein 800	0.337186	4.50589	5.89425	0.0192979	0.202205
ENSMUSG00000035960	ENSMUSG00000035960	11792	Apex1	apurinic/apyrimidinic endonuclease 1	-0.483874	4.11874	5.88129	0.0194234	0.203322
ENSMUSG00000027333	ENSMUSG00000027333	228608	Smox	spermine oxidase	-0.97992	2.00742	5.8793	0.0194427	0.203327
ENSMUSG00000026878	ENSMUSG00000026878	68365	Rab14	RAB14, member RAS oncogene family	0.208875	8.31034	5.8762	0.0194729	0.203445
ENSMUSG00000038943	ENSMUSG00000038943	233406	Prc1	protein regulator of cytokinesis 1	-1.33758	1.37689	5.88072	0.0195204	0.203743
ENSMUSG00000024965	ENSMUSG00000024965	108101	Fermt3	fermitin family member 3	-0.556163	2.77918	5.85668	0.019664	0.205043
ENSMUSG00000057037	ENSMUSG00000057037	50702	Cfhr1	complement factor H-related 1	0.658984	5.42981	5.92162	0.019683	0.205043
ENSMUSG00000051169	ENSMUSG00000051169	101122	Rpusd3	RNA pseudouridylate synthase domain containing 3	0.380291	3.47197	5.84558	0.0197735	0.205786
ENSMUSG00000000078	ENSMUSG00000000078	23849	Klf6	Kruppel-like factor 6	-0.777527	4.33894	5.90694	0.019846	0.206032
ENSMUSG00000028799	ENSMUSG00000028799	230761	Zfp362	zinc finger protein 362	-0.578263	3.09757	5.83298	0.0198986	0.206032
ENSMUSG00000040751	ENSMUSG00000040751	56743	Lat2	linker for activation of T cells family, member 2	-1.4303	1.13411	5.83973	0.0198998	0.206032
ENSMUSG00000063382	ENSMUSG00000063382	80288	Bcl9l	B cell CLL/lymphoma 9-like	0.374552	5.86069	5.83097	0.0199187	0.206032
ENSMUSG00000018796	ENSMUSG00000018796	14081	Acsl1	acyl-CoA synthetase long-chain family member 1	0.375793	9.8209	5.82971	0.0199313	0.206032
ENSMUSG00000052302	ENSMUSG00000052302	74694	Tbc1d30	TBC1 domain family, member 30	0.597053	3.01926	5.82849	0.0199434	0.206032
ENSMUSG00000037400	ENSMUSG00000037400	76295	Atp11b	ATPase, class VI, type 11B	0.363346	4.36603	5.82553	0.019973	0.206032
ENSMUSG00000015355	ENSMUSG00000015355	12506	Cd48	CD48 antigen	-1.32399	1.18509	5.82289	0.0200012	0.206032
ENSMUSG00000025198	ENSMUSG00000025198	226144	Erlin1	ER lipid raft associated 1	-0.523416	4.30666	5.8283	0.0200075	0.206032
ENSMUSG00000004071	ENSMUSG00000004071	66626	Cdip1	cell death inducing Trp53 target 1	0.297713	6.10447	5.81743	0.0200543	0.206032
ENSMUSG00000038733	ENSMUSG00000038733	226757	Wdr26	WD repeat domain 26	0.222796	7.22177	5.81658	0.0200629	0.206032
ENSMUSG00000030800	ENSMUSG00000030800	76560	Prss8	protease, serine 8 (prostasin)	-1.12881	2.42424	5.8548	0.0200698	0.206032
ENSMUSG00000020328	ENSMUSG00000020328	52653	Nudcd2	NudC domain containing 2	-0.414101	5.20913	5.81453	0.0200835	0.206032
ENSMUSG00000030968	ENSMUSG00000030968	71830	Pdilt	protein disulfide isomerase-like, testis expressed	0.873594	2.10973	5.8133	0.0200959	0.206032
ENSMUSG00000025173	ENSMUSG00000025173	66840	Wdr45b	WD repeat domain 45B	0.330261	5.4947	5.81269	0.020102	0.206032
ENSMUSG00000054477	ENSMUSG00000054477	140492	Kcnn2	potassium intermediate/small conductance calcium-activated channel, subfamily N, member 2	0.531074	3.41906	5.80973	0.0201318	0.206032
ENSMUSG00000112023	ENSMUSG00000112023	14727	Lilr4b	leukocyte immunoglobulin-like receptor, subfamily B, member 4B	-0.882658	2.48002	5.81646	0.0201375	0.206032
ENSMUSG00000038831	ENSMUSG00000038831	241308	Ralgps1	Ral GEF with PH domain and SH3 binding motif 1	-0.971166	1.90959	5.80875	0.0201418	0.206032
ENSMUSG00000062526	ENSMUSG00000062526	225651	Mppe1	metallophosphoesterase 1	-0.385173	3.8295	5.80632	0.0201663	0.206087
ENSMUSG00000051682	ENSMUSG00000051682	224840	Treml4	triggering receptor expressed on myeloid cells-like 4	-1.00576	1.58478	5.79578	0.0202731	0.206982
ENSMUSG00000032531	ENSMUSG00000032531	56332	Amotl2	angiomotin-like 2	0.429452	4.23881	5.78691	0.0203635	0.207648
ENSMUSG00000032083	ENSMUSG00000032083	11806	Apoa1	apolipoprotein A-I	0.352732	12.4596	5.7856	0.0203769	0.207648
ENSMUSG00000027829	ENSMUSG00000027829	56706	Ccnl1	cyclin L1	0.298832	5.67103	5.78019	0.0204323	0.207824
ENSMUSG00000040446	ENSMUSG00000040446	225283	Rprd1a	regulation of nuclear pre-mRNA domain containing 1A	0.386338	3.79956	5.78014	0.0204328	0.207824
ENSMUSG00000038095	ENSMUSG00000038095	243272	Sbno1	strawberry notch 1	0.216774	6.69233	5.77001	0.020537	0.208687
ENSMUSG00000036167	ENSMUSG00000036167	223828	Pphln1	periphilin 1	0.575574	2.68387	5.7669	0.0205691	0.208779
ENSMUSG00000036908	ENSMUSG00000036908	54445	Unc93b1	unc-93 homolog B1, TLR signaling regulator	-0.571831	5.21419	5.80635	0.0205849	0.208779
ENSMUSG00000030762	ENSMUSG00000030762	11833	Aqp8	aquaporin 8	-0.659378	7.9492	5.83519	0.0206218	0.208847
ENSMUSG00000046947	ENSMUSG00000046947	57869	Adck2	aarF domain containing kinase 2	0.636154	2.82775	5.76097	0.0206305	0.208847
ENSMUSG00000038648	ENSMUSG00000038648	208647	Creb3l2	cAMP responsive element binding protein 3-like 2	-0.487382	3.52144	5.75607	0.0206813	0.209039
ENSMUSG00000079494	ENSMUSG00000079494	69049	Nat8f5	N-acetyltransferase 8 (GCN5-related) family member 5	-0.935467	2.14878	5.7544	0.0207104	0.209039
ENSMUSG00000051506	ENSMUSG00000051506	545030	Wdfy4	WD repeat and FYVE domain containing 4	-0.878935	2.07603	5.75246	0.0207188	0.209039
ENSMUSG00000064899	ENSMUSG00000064899	100216530	Snord118	small nucleolar RNA, C/D box 118	0.456604	6.247	5.77021	0.0207271	0.209039
ENSMUSG00000018042	ENSMUSG00000018042	109754	Cyb5r3	cytochrome b5 reductase 3	-0.372684	9.13393	5.74977	0.0207468	0.209041
ENSMUSG00000027962	ENSMUSG00000027962	22329	Vcam1	vascular cell adhesion molecule 1	-0.702205	4.54316	5.79437	0.0208671	0.210057
ENSMUSG00000019872	ENSMUSG00000019872	57319	Smpdl3a	sphingomyelin phosphodiesterase, acid-like 3A	-0.339796	5.06147	5.73236	0.0209292	0.210374
ENSMUSG00000073680	ENSMUSG00000073680	320587	Tmem88b	transmembrane protein 88B	0.796709	1.59194	5.73155	0.0209377	0.210374
ENSMUSG00000022707	ENSMUSG00000022707	74185	Gbe1	glucan (1,4-alpha-), branching enzyme 1	-0.445893	7.24027	5.73922	0.0210373	0.211177
ENSMUSG00000006191	ENSMUSG00000006191	68916	Cdkal1	CDK5 regulatory subunit associated protein 1-like 1	0.408097	3.51214	5.7102	0.0211637	0.212249
ENSMUSG00000086316	ENSMUSG00000086316	70123	Nbdy	negative regulator of P-body association	-0.979348	1.2559	5.70185	0.0212528	0.212944
ENSMUSG00000074063	ENSMUSG00000074063	71839	Osgin1	oxidative stress induced growth inhibitor 1	0.539994	6.0825	5.74304	0.0212862	0.21308
ENSMUSG00000048332	ENSMUSG00000048332	108927	Lhfp	lipoma HMGIC fusion partner	-0.752872	3.46323	5.72546	0.0213505	0.213389
ENSMUSG00000032562	ENSMUSG00000032562	14678	Gnai2	guanine nucleotide binding protein (G protein), alpha inhibiting 2	-0.284511	7.38129	5.6892	0.0213886	0.213389
ENSMUSG00000031445	ENSMUSG00000031445	66901	Proz	protein Z, vitamin K-dependent plasma glycoprotein	0.279473	6.80463	5.68851	0.0213961	0.213389
ENSMUSG00000039967	ENSMUSG00000039967	30046	Zfp292	zinc finger protein 292	0.439842	5.08391	5.68848	0.0213964	0.213389
ENSMUSG00000036990	ENSMUSG00000036990	73945	Otud4	OTU domain containing 4	0.292159	4.64296	5.68503	0.0214336	0.213562
ENSMUSG00000033439	ENSMUSG00000033439	229780	Trmt13	tRNA methyltransferase 13	0.508013	2.82252	5.67749	0.0215151	0.214031
ENSMUSG00000021497	ENSMUSG00000021497	69672	Txndc15	thioredoxin domain containing 15	0.372407	6.11622	5.67659	0.0215249	0.214031
ENSMUSG00000024055	ENSMUSG00000024055	170716	Cyp4f13	cytochrome P450, family 4, subfamily f, polypeptide 13	0.421564	5.13452	5.67517	0.0215403	0.214031
ENSMUSG00000031631	ENSMUSG00000031631	66756	Cfap97	cilia and flagella associated protein 97	0.483992	3.63614	5.67174	0.0215776	0.214152
ENSMUSG00000025278	ENSMUSG00000025278	286940	Flnb	filamin, beta	-0.379896	4.98627	5.67038	0.0215923	0.214152
ENSMUSG00000028973	ENSMUSG00000028973	74610	Abcb8	ATP-binding cassette, sub-family B (MDR/TAP), member 8	-0.410868	3.51395	5.66047	0.0217005	0.215027
ENSMUSG00000022550	ENSMUSG00000022550	268822	Adck5	aarF domain containing kinase 5	0.411289	4.09356	5.65743	0.0217337	0.215147
ENSMUSG00000022914	ENSMUSG00000022914	93871	Brwd1	bromodomain and WD repeat domain containing 1	0.37637	5.4485	5.65305	0.0217818	0.215147
ENSMUSG00000027983	ENSMUSG00000027983	71519	Cyp2u1	cytochrome P450, family 2, subfamily u, polypeptide 1	0.530191	6.2237	5.69597	0.0217825	0.215147
ENSMUSG00000024985	ENSMUSG00000024985	21416	Tcf7l2	transcription factor 7 like 2, T cell specific, HMG box	0.24065	5.83098	5.65117	0.0218025	0.215147
ENSMUSG00000070056	ENSMUSG00000070056	52065	Mfhas1	malignant fibrous histiocytoma amplified sequence 1	0.387961	4.71691	5.65025	0.0218126	0.215147
ENSMUSG00000049489	ENSMUSG00000049489	69109	Ccnq	cyclin Q	-0.549206	2.8982	5.64536	0.0218665	0.215481
ENSMUSG00000036655	ENSMUSG00000036655	71693	Colec11	collectin sub-family member 11	-0.398386	5.17512	5.64292	0.0218934	0.215549
ENSMUSG00000025224	ENSMUSG00000025224	107338	Gbf1	golgi-specific brefeldin A-resistance factor 1	0.360013	5.12977	5.63834	0.021944	0.215752
ENSMUSG00000002031	ENSMUSG00000002031	76568	Ift46	intraflagellar transport 46	0.382873	4.11499	5.63583	0.0219718	0.215752
ENSMUSG00000015488	ENSMUSG00000015488	381356	Cacfd1	calcium channel flower domain containing 1	0.311393	4.66752	5.63562	0.0219741	0.215752
ENSMUSG00000050965	ENSMUSG00000050965	18750	Prkca	protein kinase C, alpha	-0.412036	4.06525	5.6304	0.0220321	0.216123
ENSMUSG00000031922	ENSMUSG00000031922	74360	Cep57	centrosomal protein 57	0.309104	3.97883	5.61815	0.0221688	0.217002
ENSMUSG00000044393	ENSMUSG00000044393	13511	Dsg2	desmoglein 2	0.252809	6.9349	5.61759	0.022175	0.217002
ENSMUSG00000039886	ENSMUSG00000039886	215210	Tmem120a	transmembrane protein 120A	-0.308521	6.04829	5.61573	0.0221959	0.217002
ENSMUSG00000018697	ENSMUSG00000018697	56321	Aatf	apoptosis antagonizing transcription factor	-0.389955	4.25454	5.61516	0.0222023	0.217002
ENSMUSG00000005204	ENSMUSG00000005204	80886	Senp3	SUMO/sentrin specific peptidase 3	0.762717	2.96521	5.62464	0.0222581	0.217264
ENSMUSG00000038068	ENSMUSG00000038068	218215	Rnf144b	ring finger protein 144B	0.35485	4.92397	5.60732	0.0222904	0.217264
ENSMUSG00000029153	ENSMUSG00000029153	433904	Ociad2	OCIA domain containing 2	-0.224968	6.03652	5.60628	0.022302	0.217264
ENSMUSG00000010517	ENSMUSG00000010517	14084	Faf1	Fas-associated factor 1	0.316676	4.37387	5.60559	0.0223099	0.217264
ENSMUSG00000041488	ENSMUSG00000041488	20908	Stx3	syntaxin 3	-0.748706	1.85737	5.60101	0.0223615	0.21757
ENSMUSG00000042364	ENSMUSG00000042364	170625	Snx18	sorting nexin 18	0.317304	4.3459	5.59474	0.0224324	0.218063
ENSMUSG00000040022	ENSMUSG00000040022	74998	Rab11fip2	RAB11 family interacting protein 2 (class I)	0.590827	3.19258	5.58796	0.0225095	0.218592
ENSMUSG00000048376	ENSMUSG00000048376	14062	F2r	coagulation factor II (thrombin) receptor	-0.590169	5.58437	5.63266	0.0225514	0.218592
ENSMUSG00000021670	ENSMUSG00000021670	15357	Hmgcr	3-hydroxy-3-methylglutaryl-Coenzyme A reductase	-0.759421	5.02486	5.65681	0.0225675	0.218592
ENSMUSG00000037622	ENSMUSG00000037622	230796	Wdtc1	WD and tetratricopeptide repeats 1	0.419149	5.54003	5.5811	0.0225877	0.218592
ENSMUSG00000034738	ENSMUSG00000034738	329416	Nostrin	nitric oxide synthase trafficker	0.388706	4.23809	5.58103	0.0225885	0.218592
ENSMUSG00000026875	ENSMUSG00000026875	22029	Traf1	TNF receptor-associated factor 1	-1.11627	0.920223	5.57631	0.0226424	0.218918
ENSMUSG00000028926	ENSMUSG00000028926	18647	Cdk14	cyclin-dependent kinase 14	-0.760501	1.63019	5.57166	0.0226958	0.219237
ENSMUSG00000060739	ENSMUSG00000060739	59050	Nsa2	NSA2 ribosome biogenesis homolog	0.265478	7.77881	5.5676	0.0227424	0.219365
ENSMUSG00000020649	ENSMUSG00000020649	20135	Rrm2	ribonucleotide reductase M2	-0.670195	2.09022	5.56695	0.0227499	0.219365
ENSMUSG00000035778	ENSMUSG00000035778	14594	Ggta1	glycoprotein galactosyltransferase alpha 1, 3	-0.815585	1.56842	5.56437	0.0227796	0.219455
ENSMUSG00000036856	ENSMUSG00000036856	22417	Wnt4	wingless-type MMTV integration site family, member 4	-0.852365	1.76308	5.56167	0.0228107	0.219558
ENSMUSG00000020423	ENSMUSG00000020423	12227	Btg2	B cell translocation gene 2, anti-proliferative	-0.905038	3.18584	5.60517	0.022859	0.219826
ENSMUSG00000015961	ENSMUSG00000015961	11566	Adss	adenylosuccinate synthetase, non muscle	-0.285095	5.01541	5.55457	0.0228928	0.219908
ENSMUSG00000036181	ENSMUSG00000036181	50708	Hist1h1c	histone cluster 1, H1c	-0.374942	6.57678	5.55274	0.0229141	0.219908
ENSMUSG00000031875	ENSMUSG00000031875	68119	Cmtm3	CKLF-like MARVEL transmembrane domain containing 3	-0.609572	2.79472	5.5508	0.0229366	0.219908
ENSMUSG00000074682	ENSMUSG00000074682	67917	Zcchc3	zinc finger, CCHC domain containing 3	-0.940763	1.18836	5.54971	0.0229493	0.219908
ENSMUSG00000089960	ENSMUSG00000089960	394436	Ugt1a1	UDP glucuronosyltransferase 1 family, polypeptide A1	1.27349	1.35312	5.55129	0.0230534	0.22071
ENSMUSG00000057738	ENSMUSG00000057738	20740	Sptan1	spectrin alpha, non-erythrocytic 1	-0.339858	5.83197	5.5376	0.0230904	0.220789
ENSMUSG00000059040	ENSMUSG00000059040	433182	Eno1b	enolase 1B, retrotransposed	-0.348898	7.51836	5.53655	0.0231027	0.220789
ENSMUSG00000053347	ENSMUSG00000053347	74670	Zfp943	zinc finger prtoein 943	0.555439	2.70732	5.52505	0.0232377	0.22176
ENSMUSG00000023827	ENSMUSG00000023827	68262	Agpat4	1-acylglycerol-3-phosphate O-acyltransferase 4 (lysophosphatidic acid acyltransferase, delta)	-0.946002	0.919172	5.52438	0.0232455	0.22176
ENSMUSG00000020564	ENSMUSG00000020564	380753	Atxn7l1	ataxin 7-like 1	0.432267	3.32343	5.51128	0.0234004	0.222934
ENSMUSG00000031858	ENSMUSG00000031858	74549	Mau2	MAU2 sister chromatid cohesion factor	0.472712	3.45563	5.50843	0.0234343	0.222934
ENSMUSG00000017453	ENSMUSG00000017453	19193	Pipox	pipecolic acid oxidase	0.441861	6.99824	5.52487	0.023455	0.222934
ENSMUSG00000002820	ENSMUSG00000002820	235040	Atg4d	autophagy related 4D, cysteine peptidase	0.450706	3.70623	5.50538	0.0234705	0.222934
ENSMUSG00000032898	ENSMUSG00000032898	231670	Fbxo21	F-box protein 21	0.346111	6.03536	5.50386	0.0234886	0.222934
ENSMUSG00000047412	ENSMUSG00000047412	235132	Zbtb44	zinc finger and BTB domain containing 44	0.258219	5.83961	5.50303	0.0234985	0.222934
ENSMUSG00000026475	ENSMUSG00000026475	19734	Rgs16	regulator of G-protein signaling 16	-0.901398	6.2322	5.59209	0.0235175	0.222934
ENSMUSG00000047617	ENSMUSG00000047617	227622	Paxx	non-homologous end joining factor	0.478957	2.83814	5.50003	0.0235343	0.222934
ENSMUSG00000040711	ENSMUSG00000040711	268396	Sh3pxd2b	SH3 and PX domains 2B	-1.21122	1.245	5.49614	0.0235808	0.223177
ENSMUSG00000048163	ENSMUSG00000048163	20345	Selplg	selectin, platelet (p-selectin) ligand	-0.763273	1.92746	5.49309	0.0236173	0.223326
ENSMUSG00000031516	ENSMUSG00000031516	22428	Dctn6	dynactin 6	-0.454755	4.1931	5.4895	0.0236604	0.223538
ENSMUSG00000025024	ENSMUSG00000025024	76479	Smndc1	survival motor neuron domain containing 1	0.292675	4.49315	5.47669	0.0238147	0.224798
ENSMUSG00000018727	ENSMUSG00000018727	52670	Cpsf4l	cleavage and polyadenylation specific factor 4-like	0.706852	3.33405	5.49353	0.0238696	0.225119
ENSMUSG00000024712	ENSMUSG00000024712	54391	Rfk	riboflavin kinase	-0.28934	5.58272	5.46654	0.0239378	0.225563
ENSMUSG00000029322	ENSMUSG00000029322	231507	Plac8	placenta-specific 8	-0.880623	3.78095	5.52777	0.0239754	0.225563
ENSMUSG00000026854	ENSMUSG00000026854	74270	Usp20	ubiquitin specific peptidase 20	-0.624233	2.88813	5.4631	0.0239796	0.225563
ENSMUSG00000036550	ENSMUSG00000036550	234594	Cnot1	CCR4-NOT transcription complex, subunit 1	0.262961	5.27525	5.4607	0.0240088	0.225641
ENSMUSG00000024525	ENSMUSG00000024525	114663	Impa2	inositol (myo)-1(or 4)-monophosphatase 2	-0.627784	2.68102	5.45108	0.0241265	0.226437
ENSMUSG00000052957	ENSMUSG00000052957	14451	Gas1	growth arrest specific 1	0.468171	4.26286	5.44753	0.0241701	0.226437
ENSMUSG00000024816	ENSMUSG00000024816	67457	Frmd8	FERM domain containing 8	-0.460776	4.13038	5.44712	0.024175	0.226437
ENSMUSG00000030579	ENSMUSG00000030579	22177	Tyrobp	TYRO protein tyrosine kinase binding protein	-0.628481	4.21771	5.47874	0.0241777	0.226437
ENSMUSG00000027784	ENSMUSG00000027784	242083	Ppm1l	protein phosphatase 1 (formerly 2C)-like	0.330165	4.26305	5.4413	0.0242468	0.226886
ENSMUSG00000030556	ENSMUSG00000030556	67867	Lrrc28	leucine rich repeat containing 28	-0.323878	4.52339	5.43588	0.0243136	0.227314
ENSMUSG00000049327	ENSMUSG00000049327	67956	Kmt5a	lysine methyltransferase 5A	-0.388216	5.64133	5.43278	0.024352	0.227409
ENSMUSG00000026491	ENSMUSG00000026491	226747	Ahctf1	AT hook containing transcription factor 1	0.350678	3.82232	5.43164	0.024366	0.227409
ENSMUSG00000052812	ENSMUSG00000052812	320817	Atad2b	ATPase family, AAA domain containing 2B	0.287835	4.99777	5.4285	0.0244051	0.227438
ENSMUSG00000032411	ENSMUSG00000032411	211586	Tfdp2	transcription factor Dp 2	0.292284	4.44917	5.42586	0.0244379	0.227438
ENSMUSG00000058216	ENSMUSG00000058216	225884	Gstp3	glutathione S-transferase pi 3	-0.550169	2.98607	5.42459	0.0244536	0.227438
ENSMUSG00000031577	ENSMUSG00000031577	234138	Tti2	TELO2 interacting protein 2	0.45287	2.68524	5.42459	0.0244536	0.227438
ENSMUSG00000022831	ENSMUSG00000022831	15163	Hcls1	hematopoietic cell specific Lyn substrate 1	-0.648881	3.17994	5.42361	0.0244877	0.227558
ENSMUSG00000041740	ENSMUSG00000041740	50849	Rnf10	ring finger protein 10	0.36551	5.02557	5.41676	0.0245513	0.227952
ENSMUSG00000052751	ENSMUSG00000052751	58887	Repin1	replication initiator 1	0.349725	5.52774	5.41297	0.0245987	0.228041
ENSMUSG00000028221	ENSMUSG00000028221	72519	Pip4p2	phosphatidylinositol-4,5-bisphosphate 4-phosphatase 2	-0.44952	3.29786	5.4126	0.0246032	0.228041
ENSMUSG00000030555	ENSMUSG00000030555	67009	Ttc23	tetratricopeptide repeat domain 23	-0.328921	4.90999	5.4081	0.0246597	0.228368
ENSMUSG00000027864	ENSMUSG00000027864	19221	Ptgfrn	prostaglandin F2 receptor negative regulator	-1.05208	1.54475	5.40293	0.0247246	0.228695
ENSMUSG00000022111	ENSMUSG00000022111	50933	Uchl3	ubiquitin carboxyl-terminal esterase L3 (ubiquitin thiolesterase)	-0.557763	4.81895	5.4313	0.0247421	0.228695
ENSMUSG00000039783	ENSMUSG00000039783	98256	Kmo	kynurenine 3-monooxygenase (kynurenine 3-hydroxylase)	0.294836	7.22326	5.39716	0.0247974	0.228695
ENSMUSG00000016018	ENSMUSG00000016018	72198	Mtrex	Mtr4 exosome RNA helicase	0.357303	4.63501	5.39715	0.0247976	0.228695
ENSMUSG00000058921	ENSMUSG00000058921	241877	Slc10a5	solute carrier family 10 (sodium/bile acid cotransporter family), member 5	0.818715	4.00178	5.45871	0.024819	0.228695
ENSMUSG00000052299	ENSMUSG00000052299	78913	Ltn1	listerin E3 ubiquitin protein ligase 1	0.344176	4.82528	5.39517	0.0248226	0.228695
ENSMUSG00000021336	ENSMUSG00000021336	319848	Slc17a4	solute carrier family 17 (sodium phosphate), member 4	-0.35258	5.45139	5.39327	0.0248466	0.228721
ENSMUSG00000001155	ENSMUSG00000001155	14317	Ftcd	formiminotransferase cyclodeaminase	0.384931	8.45717	5.38646	0.024933	0.229319
ENSMUSG00000000049	ENSMUSG00000000049	11818	Apoh	apolipoprotein H	0.28543	10.5727	5.37121	0.0251274	0.23084
ENSMUSG00000020205	ENSMUSG00000020205	21664	Phlda1	pleckstrin homology like domain, family A, member 1	0.870979	6.80562	5.45695	0.0251412	0.23084
ENSMUSG00000041115	ENSMUSG00000041115	245666	Iqsec2	IQ motif and Sec7 domain 2	-0.530112	3.14434	5.36045	0.0252657	0.231785
ENSMUSG00000049295	ENSMUSG00000049295	69890	Zfp219	zinc finger protein 219	0.429391	3.4985	5.35712	0.0253086	0.231981
ENSMUSG00000034744	ENSMUSG00000034744	56174	Nagk	N-acetylglucosamine kinase	-0.421389	4.51384	5.35456	0.0253418	0.232087
ENSMUSG00000071547	ENSMUSG00000071547	70021	Nt5dc2	5'-nucleotidase domain containing 2	-0.6338	2.89042	5.35037	0.0253959	0.232329
ENSMUSG00000026922	ENSMUSG00000026922	67512	Agpat2	1-acylglycerol-3-phosphate O-acyltransferase 2 (lysophosphatidic acid acyltransferase, beta)	0.273173	7.36258	5.34395	0.0254793	0.232329
ENSMUSG00000095304	ENSMUSG00000095304	211623	Plac9a	placenta specific 9a	-0.43764	3.35636	5.3434	0.0254865	0.232329
ENSMUSG00000041782	ENSMUSG00000041782	16763	Lad1	ladinin	0.704657	2.56167	5.34238	0.0254997	0.232329
ENSMUSG00000038217	ENSMUSG00000038217	380712	Tlcd2	TLC domain containing 2	0.325475	7.33596	5.34119	0.0255151	0.232329
ENSMUSG00000028952	ENSMUSG00000028952	100090	Zbtb48	zinc finger and BTB domain containing 48	0.572338	2.70962	5.34023	0.0255276	0.232329
ENSMUSG00000026986	ENSMUSG00000026986	140483	Hnmt	histamine N-methyltransferase	-0.44046	5.15656	5.34429	0.0255337	0.232329
ENSMUSG00000026519	ENSMUSG00000026519	208795	Tmem63a	transmembrane protein 63a	0.380477	4.61013	5.33833	0.0255525	0.232329
ENSMUSG00000028832	ENSMUSG00000028832	16765	Stmn1	stathmin 1	-0.64846	3.84522	5.36193	0.0255624	0.232329
ENSMUSG00000026833	ENSMUSG00000026833	56177	Olfm1	olfactomedin 1	-0.474998	2.61683	5.33159	0.0256405	0.232842
ENSMUSG00000021171	ENSMUSG00000021171	52635	Esyt2	extended synaptotagmin-like protein 2	-0.468953	3.89307	5.32895	0.0256751	0.232959
ENSMUSG00000030378	ENSMUSG00000030378	76971	Sult2a8	sulfotransferase family 2A, dehydroepiandrosterone (DHEA)-preferring, member 8	1.02623	7.83704	5.41406	0.0257441	0.233335
ENSMUSG00000050079	ENSMUSG00000050079	67610	Rspry1	ring finger and SPRY domain containing 1	0.304219	4.20739	5.3225	0.0257599	0.233335
ENSMUSG00000017009	ENSMUSG00000017009	20971	Sdc4	syndecan 4	0.341585	7.79822	5.31974	0.0257961	0.233466
ENSMUSG00000029422	ENSMUSG00000029422	208606	Rsrc2	arginine/serine-rich coiled-coil 2	0.33011	5.78536	5.31668	0.0258365	0.233636
ENSMUSG00000042248	ENSMUSG00000042248	13096	Cyp2c37	cytochrome P450, family 2. subfamily c, polypeptide 37	0.963012	7.18772	5.40034	0.0259024	0.233812
ENSMUSG00000028456	ENSMUSG00000028456	22249	Unc13b	unc-13 homolog B	-0.726961	2.52329	5.30912	0.0259364	0.233812
ENSMUSG00000051316	ENSMUSG00000051316	24074	Taf7	TATA-box binding protein associated factor 7	0.588892	2.37536	5.30882	0.0259404	0.233812
ENSMUSG00000036594	ENSMUSG00000036594	14960	H2-Aa	histocompatibility 2, class II antigen A, alpha	-0.838116	6.40698	5.39183	0.0259442	0.233812
ENSMUSG00000025235	ENSMUSG00000025235	102774	Bbs4	Bardet-Biedl syndrome 4 (human)	0.676416	1.81914	5.307	0.0259646	0.233812
ENSMUSG00000028692	ENSMUSG00000028692	58810	Akr1a1	aldo-keto reductase family 1, member A1 (aldehyde reductase)	-0.241559	8.6785	5.30411	0.026003	0.233961
ENSMUSG00000025066	ENSMUSG00000025066	67788	Sfr1	SWI5 dependent recombination repair 1	0.208004	6.03612	5.30143	0.0260386	0.234007
ENSMUSG00000039384	ENSMUSG00000039384	63953	Dusp10	dual specificity phosphatase 10	-0.995376	1.23139	5.30046	0.0260515	0.234007
ENSMUSG00000019989	ENSMUSG00000019989	209558	Enpp3	ectonucleotide pyrophosphatase/phosphodiesterase 3	0.50123	5.50914	5.32399	0.0260922	0.234177
ENSMUSG00000045282	ENSMUSG00000045282	68255	Tmem86b	transmembrane protein 86B	0.39128	5.33629	5.29335	0.0261464	0.234228
ENSMUSG00000024026	ENSMUSG00000024026	109801	Glo1	glyoxalase 1	0.25353	8.80254	5.29332	0.0261468	0.234228
ENSMUSG00000074336	ENSMUSG00000074336	11425	Apoc4	apolipoprotein C-IV	0.297438	10.2384	5.2921	0.0261632	0.234228
ENSMUSG00000056209	ENSMUSG00000056209	18150	Npm3	nucleoplasmin 3	0.385989	3.99468	5.28781	0.0262207	0.234548
ENSMUSG00000029726	ENSMUSG00000029726	231803	Mepce	methylphosphate capping enzyme	0.405665	3.47372	5.28131	0.026308	0.235133
ENSMUSG00000019210	ENSMUSG00000019210	11973	Atp6v1e1	ATPase, H+ transporting, lysosomal V1 subunit E1	-0.230096	7.10893	5.27576	0.0263828	0.23541
ENSMUSG00000035561	ENSMUSG00000035561	72535	Aldh1b1	aldehyde dehydrogenase 1 family, member B1	-0.597455	6.33191	5.33119	0.0264016	0.23541
ENSMUSG00000054115	ENSMUSG00000054115	27401	Skp2	S-phase kinase-associated protein 2 (p45)	-0.813912	1.29022	5.27273	0.0264236	0.23541
ENSMUSG00000027708	ENSMUSG00000027708	114893	Dcun1d1	DCN1, defective in cullin neddylation 1, domain containing 1 (S. cerevisiae)	0.24358	6.07094	5.27252	0.0264265	0.23541
ENSMUSG00000037818	ENSMUSG00000037818	269423	Abhd18	abhydrolase domain containing 18	0.326883	4.16452	5.27081	0.0264496	0.235421
ENSMUSG00000061718	ENSMUSG00000061718	19049	Ppp1r1b	protein phosphatase 1, regulatory inhibitor subunit 1B	-0.673677	2.41183	5.26405	0.0265413	0.236042
ENSMUSG00000006392	ENSMUSG00000006392	80509	Med8	mediator complex subunit 8	0.252636	5.32047	5.26166	0.0265739	0.236119
ENSMUSG00000003363	ENSMUSG00000003363	18807	Pld3	phospholipase D family, member 3	-0.427788	4.04836	5.25988	0.0265981	0.236119
ENSMUSG00000019979	ENSMUSG00000019979	11783	Apaf1	apoptotic peptidase activating factor 1	-0.821631	1.30794	5.25858	0.0266157	0.236119
ENSMUSG00000035181	ENSMUSG00000035181	320487	Heatr5a	HEAT repeat containing 5A	-0.55442	2.84771	5.25489	0.0266662	0.23628
ENSMUSG00000079523	ENSMUSG00000079523	19240	Tmsb10	thymosin, beta 10	-0.728184	5.43099	5.32087	0.0266971	0.23628
ENSMUSG00000029064	ENSMUSG00000029064	14688	Gnb1	guanine nucleotide binding protein (G protein), beta 1	-0.287581	5.63448	5.25243	0.0266997	0.23628
ENSMUSG00000039438	ENSMUSG00000039438	192653	Ttc36	tetratricopeptide repeat domain 36	0.361718	8.81046	5.25079	0.0267221	0.236283
ENSMUSG00000032591	ENSMUSG00000032591	15235	Mst1	macrophage stimulating 1 (hepatocyte growth factor-like)	0.271246	6.54565	5.24919	0.0267441	0.236283
ENSMUSG00000024659	ENSMUSG00000024659	16952	Anxa1	annexin A1	-1.18794	1.22522	5.24174	0.0268463	0.236991
ENSMUSG00000031388	ENSMUSG00000031388	56292	Naa10	N(alpha)-acetyltransferase 10, NatA catalytic subunit	0.351317	4.43487	5.24015	0.0268683	0.236991
ENSMUSG00000041638	ENSMUSG00000041638	231659	Gcn1	GCN1 activator of EIF2AK4	0.384095	5.16138	5.23731	0.0269074	0.237069
ENSMUSG00000074476	ENSMUSG00000074476	67629	Spc24	SPC24, NDC80 kinetochore complex component, homolog (S. cerevisiae)	-0.345769	4.33652	5.23557	0.0269314	0.237069
ENSMUSG00000069662	ENSMUSG00000069662	17118	Marcks	myristoylated alanine rich protein kinase C substrate	-0.512303	5.24422	5.2586	0.0269622	0.237069
ENSMUSG00000000326	ENSMUSG00000000326	12846	Comt	catechol-O-methyltransferase	0.267169	9.40138	5.23162	0.026986	0.237069
ENSMUSG00000025790	ENSMUSG00000025790	108116	Slco3a1	solute carrier organic anion transporter family, member 3a1	-0.60206	2.65238	5.23153	0.0269872	0.237069
ENSMUSG00000044147	ENSMUSG00000044147	11845	Arf6	ADP-ribosylation factor 6	-0.297453	5.45574	5.22759	0.0270418	0.237355
ENSMUSG00000029370	ENSMUSG00000029370	73246	Rassf6	Ras association (RalGDS/AF-6) domain family member 6	-0.683017	2.61398	5.22119	0.0271306	0.237765
ENSMUSG00000037098	ENSMUSG00000037098	215445	Rab11fip3	RAB11 family interacting protein 3 (class II)	-0.418547	3.42978	5.22104	0.0271328	0.237765
ENSMUSG00000003660	ENSMUSG00000003660	320632	Snrnp200	small nuclear ribonucleoprotein 200 (U5)	0.278069	5.04192	5.21495	0.0272177	0.238297
ENSMUSG00000029729	ENSMUSG00000029729	74570	Zkscan1	zinc finger with KRAB and SCAN domains 1	0.344044	4.49961	5.21351	0.0272378	0.238297
ENSMUSG00000040618	ENSMUSG00000040618	74551	Pck2	phosphoenolpyruvate carboxykinase 2 (mitochondrial)	-0.867088	1.62921	5.20082	0.0274156	0.239651
ENSMUSG00000000739	ENSMUSG00000000739	57429	Sult5a1	sulfotransferase family 5A, member 1	1.01944	3.61186	5.27018	0.027437	0.239651
ENSMUSG00000035041	ENSMUSG00000035041	208677	Creb3l3	cAMP responsive element binding protein 3-like 3	0.330424	8.40476	5.19756	0.0274616	0.239671
ENSMUSG00000006219	ENSMUSG00000006219	74202	Fblim1	filamin binding LIM protein 1	-0.923989	1.41824	5.19491	0.027499	0.239803
ENSMUSG00000045180	ENSMUSG00000045180	110380	Shroom2	shroom family member 2	0.444113	3.5548	5.18853	0.0275893	0.240003
ENSMUSG00000022772	ENSMUSG00000022772	320213	Senp5	SUMO/sentrin specific peptidase 5	0.358929	4.04827	5.18818	0.0275942	0.240003
ENSMUSG00000033499	ENSMUSG00000033499	217980	Larp4b	La ribonucleoprotein domain family, member 4B	0.217	6.98127	5.18813	0.0275949	0.240003
ENSMUSG00000042447	ENSMUSG00000042447	252875	Mios	meiosis regulator for oocyte development	0.427863	2.8915	5.18574	0.0276288	0.240003
ENSMUSG00000035247	ENSMUSG00000035247	207304	Hectd1	HECT domain E3 ubiquitin protein ligase 1	0.222085	7.52549	5.18473	0.0276431	0.240003
ENSMUSG00000030148	ENSMUSG00000030148	26888	Clec4a2	C-type lectin domain family 4, member a2	-1.25214	1.49889	5.18885	0.0276632	0.240003
ENSMUSG00000070368	ENSMUSG00000070368	246691	Prok1	prokineticin 1	1.28251	1.33869	5.19466	0.0276781	0.240003
ENSMUSG00000019978	ENSMUSG00000019978	13822	Epb41l2	erythrocyte membrane protein band 4.1 like 2	-0.458663	4.16202	5.16742	0.0278901	0.241521
ENSMUSG00000029482	ENSMUSG00000029482	78894	Aacs	acetoacetyl-CoA synthetase	-0.861367	4.81876	5.23855	0.027927	0.241521
ENSMUSG00000063663	ENSMUSG00000063663	382236	Brwd3	bromodomain and WD repeat domain containing 3	0.416545	3.32873	5.16366	0.027944	0.241521
ENSMUSG00000091721	ENSMUSG00000091721	433653	Gimd1	GIMAP family P-loop NTPase domain containing 1	-0.717464	2.60369	5.16269	0.0279579	0.241521
ENSMUSG00000051146	ENSMUSG00000051146	73047	Camk2n2	calcium/calmodulin-dependent protein kinase II inhibitor 2	-0.601568	2.02198	5.16217	0.0279654	0.241521
ENSMUSG00000035637	ENSMUSG00000035637	76238	Grhpr	glyoxylate reductase/hydroxypyruvate reductase	0.238097	7.97197	5.14584	0.0282013	0.243231
ENSMUSG00000019878	ENSMUSG00000019878	15500	Hsf2	heat shock factor 2	0.264012	5.01705	5.14533	0.0282086	0.243231
ENSMUSG00000038256	ENSMUSG00000038256	77578	Bcl9	B cell CLL/lymphoma 9	0.432634	2.72449	5.14186	0.028259	0.243438
ENSMUSG00000040648	ENSMUSG00000040648	227399	Ppip5k2	diphosphoinositol pentakisphosphate kinase 2	0.261865	5.30619	5.13948	0.0282937	0.243438
ENSMUSG00000025200	ENSMUSG00000025200	72502	Cwf19l1	CWF19-like 1, cell cycle control (S. pombe)	0.512096	3.15003	5.13901	0.0283005	0.243438
ENSMUSG00000034343	ENSMUSG00000034343	67921	Ube2f	ubiquitin-conjugating enzyme E2F (putative)	-0.237848	5.03406	5.1327	0.0283925	0.243956
ENSMUSG00000047907	ENSMUSG00000047907	228911	Tshz2	teashirt zinc finger family member 2	0.389247	4.46062	5.13178	0.028406	0.243956
ENSMUSG00000001020	ENSMUSG00000001020	20198	S100a4	S100 calcium binding protein A4	-1.13226	1.55447	5.12344	0.0285283	0.244811
ENSMUSG00000036256	ENSMUSG00000036256	29817	Igfbp7	insulin-like growth factor binding protein 7	-0.552509	6.58779	5.16101	0.0286532	0.245607
ENSMUSG00000036892	ENSMUSG00000036892	56189	Prodh2	proline dehydrogenase (oxidase) 2	0.338682	6.79655	5.11277	0.0286853	0.245607
ENSMUSG00000026554	ENSMUSG00000026554	98193	Dcaf8	DDB1 and CUL4 associated factor 8	0.209049	6.55783	5.11249	0.0286895	0.245607
ENSMUSG00000025825	ENSMUSG00000025825	66383	Iscu	iron-sulfur cluster assembly enzyme	-0.430557	6.38904	5.12239	0.0287679	0.246082
ENSMUSG00000040938	ENSMUSG00000040938	216867	Slc16a11	solute carrier family 16 (monocarboxylic acid transporters), member 11	-0.684011	3.94778	5.14026	0.0288187	0.246321
ENSMUSG00000098557	ENSMUSG00000098557	239217	Kctd12	potassium channel tetramerisation domain containing 12	-0.519087	3.40398	5.09505	0.0289486	0.247235
ENSMUSG00000037440	ENSMUSG00000037440	22361	Vnn1	vanin 1	-0.36631	6.37649	5.09242	0.0289878	0.247253
ENSMUSG00000038456	ENSMUSG00000038456	209773	Dennd2a	DENN/MADD domain containing 2A	-0.632407	1.68358	5.09175	0.0289979	0.247253
ENSMUSG00000020680	ENSMUSG00000020680	70439	Taf15	TATA-box binding protein associated factor 15	0.310155	4.77921	5.09029	0.0290197	0.247253
ENSMUSG00000001119	ENSMUSG00000001119	12833	Col6a1	collagen, type VI, alpha 1	-0.889665	2.01919	5.08423	0.0291104	0.247529
ENSMUSG00000033039	ENSMUSG00000033039	27008	Micall1	microtubule associated monooxygenase, calponin and LIM domain containing -like 1	0.40532	3.33092	5.08406	0.0291131	0.247529
ENSMUSG00000031379	ENSMUSG00000031379	69656	Pir	pirin	-0.456591	3.26414	5.08309	0.0291276	0.247529
ENSMUSG00000054021	ENSMUSG00000054021	68346	Sirt5	sirtuin 5	-0.524856	3.38886	5.08146	0.0291521	0.247529
ENSMUSG00000036585	ENSMUSG00000036585	14164	Fgf1	fibroblast growth factor 1	0.39408	6.04506	5.08306	0.0291839	0.247529
ENSMUSG00000031173	ENSMUSG00000031173	18416	Otc	ornithine transcarbamylase	0.300579	8.19019	5.07774	0.0292081	0.247529
ENSMUSG00000030237	ENSMUSG00000030237	28250	Slco1a4	solute carrier organic anion transporter family, member 1a4	-0.446728	5.7645	5.09115	0.0292381	0.247529
ENSMUSG00000045328	ENSMUSG00000045328	229841	Cenpe	centromere protein E	-1.16359	1.37137	5.07523	0.0292459	0.247529
ENSMUSG00000056305	ENSMUSG00000056305	28035	Usp39	ubiquitin specific peptidase 39	0.353388	3.94072	5.07351	0.029272	0.247529
ENSMUSG00000026150	ENSMUSG00000026150	75734	Mff	mitochondrial fission factor	-0.29565	4.67836	5.071	0.0293098	0.247529
ENSMUSG00000021228	ENSMUSG00000021228	171281	Acot3	acyl-CoA thioesterase 3	-1.19794	5.06714	5.15315	0.0293185	0.247529
ENSMUSG00000026639	ENSMUSG00000026639	16780	Lamb3	laminin, beta 3	-0.893351	2.31734	5.07884	0.0293645	0.247529
ENSMUSG00000020435	ENSMUSG00000020435	74309	Osbp2	oxysterol binding protein 2	0.968209	0.989802	5.06694	0.0293713	0.247529
ENSMUSG00000032311	ENSMUSG00000032311	83961	Nrg4	neuregulin 4	-0.732886	3.4086	5.09565	0.0293741	0.247529
ENSMUSG00000024976	ENSMUSG00000024976	56392	Shoc2	Shoc2, leucine rich repeat scaffold protein	0.320735	4.32089	5.05931	0.0294872	0.248288
ENSMUSG00000003154	ENSMUSG00000003154	60611	Foxj2	forkhead box J2	0.418143	2.76309	5.05537	0.0295473	0.248386
ENSMUSG00000031147	ENSMUSG00000031147	54634	Magix	MAGI family member, X-linked	0.564627	2.28697	5.05523	0.0295494	0.248386
ENSMUSG00000029578	ENSMUSG00000029578	74781	Wipi2	WD repeat domain, phosphoinositide interacting 2	0.232492	5.54304	5.05401	0.0295681	0.248386
ENSMUSG00000005103	ENSMUSG00000005103	22388	Wdr1	WD repeat domain 1	-0.309125	4.50787	5.05114	0.0296119	0.24856
ENSMUSG00000028843	ENSMUSG00000028843	73723	Sh3bgrl3	SH3 domain binding glutamic acid-rich protein-like 3	-0.557965	4.08562	5.06176	0.029687	0.248996
ENSMUSG00000022371	ENSMUSG00000022371	12818	Col14a1	collagen, type XIV, alpha 1	-0.447989	5.62674	5.05595	0.0297622	0.249433
ENSMUSG00000008734	ENSMUSG00000008734	64297	Gprc5b	G protein-coupled receptor, family C, group 5, member B	-1.59916	1.26885	5.07047	0.0298231	0.249748
ENSMUSG00000031226	ENSMUSG00000031226	67683	Pbdc1	polysaccharide biosynthesis domain containing 1	-0.40708	3.21098	5.03477	0.0298633	0.249781
ENSMUSG00000029771	ENSMUSG00000029771	27056	Irf5	interferon regulatory factor 5	0.613219	2.91382	5.03411	0.0298735	0.249781
ENSMUSG00000059263	ENSMUSG00000059263	74996	Usp47	ubiquitin specific peptidase 47	0.223068	5.69241	5.03156	0.029913	0.249918
ENSMUSG00000041237	ENSMUSG00000041237	18770	Pklr	pyruvate kinase liver and red blood cell	-0.425095	6.42597	5.03635	0.0300586	0.250939
ENSMUSG00000070934	ENSMUSG00000070934	68441	Rraga	Ras-related GTP binding A	-0.47785	5.28387	5.03637	0.0301337	0.251236
ENSMUSG00000048285	ENSMUSG00000048285	319710	Frmd6	FERM domain containing 6	-0.543272	3.06711	5.01688	0.0301408	0.251236
ENSMUSG00000043923	ENSMUSG00000043923	382073	Ccdc84	coiled-coil domain containing 84	0.374141	3.99672	5.01431	0.030181	0.251376
ENSMUSG00000023349	ENSMUSG00000023349	56620	Clec4n	C-type lectin domain family 4, member n	-0.786334	2.23486	5.00431	0.0303374	0.252483
ENSMUSG00000005732	ENSMUSG00000005732	19385	Ranbp1	RAN binding protein 1	0.258147	4.53858	5.00113	0.0303874	0.252604
ENSMUSG00000025860	ENSMUSG00000025860	11798	Xiap	X-linked inhibitor of apoptosis	0.247074	6.67192	5.0004	0.0303989	0.252604
ENSMUSG00000019471	ENSMUSG00000019471	12539	Cdc37	cell division cycle 37	0.305164	5.58017	4.99708	0.0304513	0.252844
ENSMUSG00000027546	ENSMUSG00000027546	11981	Atp9a	ATPase, class II, type 9A	-0.394586	6.33579	4.99965	0.0304874	0.252949
ENSMUSG00000045854	ENSMUSG00000045854	108755	Lyrm2	LYR motif containing 2	-0.384993	3.74407	4.98918	0.0305761	0.253489
ENSMUSG00000078919	ENSMUSG00000078919	13480	Dpm1	dolichol-phosphate (beta-D) mannosyltransferase 1	0.510967	3.41146	4.97659	0.030776	0.254951
ENSMUSG00000025630	ENSMUSG00000025630	15452	Hprt	hypoxanthine guanine phosphoribosyl transferase	-0.364572	5.30176	4.97368	0.0308225	0.255139
ENSMUSG00000027577	ENSMUSG00000027577	11438	Chrna4	cholinergic receptor, nicotinic, alpha polypeptide 4	-1.73018	2.39363	5.041	0.0308551	0.255213
ENSMUSG00000007656	ENSMUSG00000007656	59046	Arpp19	cAMP-regulated phosphoprotein 19	-0.259436	6.74781	4.9686	0.0309036	0.255418
ENSMUSG00000001783	ENSMUSG00000001783	28088	Rtcb	RNA 2',3'-cyclic phosphate and 5'-OH ligase	0.23965	5.2243	4.96695	0.0309301	0.25544
ENSMUSG00000035936	ENSMUSG00000035936	214579	Aldh5a1	aldhehyde dehydrogenase family 5, subfamily A1	-0.232178	5.36619	4.9629	0.0309951	0.255781
ENSMUSG00000032777	ENSMUSG00000032777	233863	Gtf3c1	general transcription factor III C 1	-0.325329	4.42894	4.9574	0.0310836	0.256315
ENSMUSG00000050410	ENSMUSG00000050410	106795	Tcf19	transcription factor 19	-0.755341	1.57186	4.95547	0.0311148	0.256375
ENSMUSG00000057228	ENSMUSG00000057228	23923	Aadat	aminoadipate aminotransferase	0.517266	5.80959	4.98454	0.031203	0.256884
ENSMUSG00000042831	ENSMUSG00000042831	233065	Alkbh6	alkB homolog 6	-0.59008	2.74142	4.94869	0.0312243	0.256884
ENSMUSG00000031337	ENSMUSG00000031337	17772	Mtm1	X-linked myotubular myopathy gene 1	0.377508	3.08142	4.94489	0.0312859	0.257007
ENSMUSG00000035493	ENSMUSG00000035493	21810	Tgfbi	transforming growth factor, beta induced	-0.527688	4.77875	4.96739	0.031287	0.257007
ENSMUSG00000001542	ENSMUSG00000001542	192657	Ell2	elongation factor RNA polymerase II 2	0.304286	5.51654	4.94243	0.0313259	0.25713
ENSMUSG00000046447	ENSMUSG00000046447	66259	Camk2n1	calcium/calmodulin-dependent protein kinase II inhibitor 1	0.26622	7.93369	4.93734	0.0314087	0.257613
ENSMUSG00000026811	ENSMUSG00000026811	50935	St6galnac6	ST6 (alpha-N-acetyl-neuraminyl-2,3-beta-galactosyl-1,3)-N-acetylgalactosaminide alpha-2,6-sialyltransferase 6	0.543604	4.3098	4.95435	0.0314393	0.257653
ENSMUSG00000061232	ENSMUSG00000061232	14972	H2-K1	histocompatibility 2, K1, K region	-0.235582	10.1336	4.93411	0.0314614	0.257653
ENSMUSG00000000538	ENSMUSG00000000538	216810	Tom1l2	target of myb1-like 2 (chicken)	-0.348079	4.63144	4.93204	0.0314952	0.257733
ENSMUSG00000003382	ENSMUSG00000003382	27049	Etv3	ets variant 3	0.371232	2.85763	4.92172	0.0316644	0.258921
ENSMUSG00000022781	ENSMUSG00000022781	224105	Pak2	p21 (RAC1) activated kinase 2	0.328475	5.22332	4.92006	0.0316917	0.258948
ENSMUSG00000000738	ENSMUSG00000000738	234847	Spg7	SPG7, paraplegin matrix AAA peptidase subunit	-0.234485	5.69504	4.91219	0.0318216	0.259812
ENSMUSG00000003573	ENSMUSG00000003573	26558	Homer3	homer scaffolding protein 3	-1.02265	0.979784	4.91072	0.0318458	0.259812
ENSMUSG00000021619	ENSMUSG00000021619	66795	Atg10	autophagy related 10	-0.459469	2.91849	4.90785	0.0318933	0.260003
ENSMUSG00000042520	ENSMUSG00000042520	74383	Ubap2l	ubiquitin-associated protein 2-like	0.230107	5.59979	4.90347	0.0319661	0.260368
ENSMUSG00000072674	ENSMUSG00000072674	100039246	Plac9b	placenta specific 9b	-0.427512	3.30769	4.90224	0.0319865	0.260368
ENSMUSG00000022437	ENSMUSG00000022437	68653	Samm50	SAMM50 sorting and assembly machinery component	-0.295967	6.20402	4.90072	0.0320117	0.260376
ENSMUSG00000027575	ENSMUSG00000027575	228998	Arfgap1	ADP-ribosylation factor GTPase activating protein 1	0.38271	4.42776	4.89856	0.0320477	0.260473
ENSMUSG00000002803	ENSMUSG00000002803	399566	Btbd6	BTB (POZ) domain containing 6	0.405053	3.38557	4.89106	0.0321729	0.261027
ENSMUSG00000024691	ENSMUSG00000024691	107373	Fam111a	family with sequence similarity 111, member A	-0.566699	2.99739	4.89083	0.0321768	0.261027
ENSMUSG00000031834	ENSMUSG00000031834	18709	Pik3r2	phosphoinositide-3-kinase regulatory subunit 2	0.332554	3.83006	4.89012	0.0321887	0.261027
ENSMUSG00000005621	ENSMUSG00000005621	233410	Zfp592	zinc finger protein 592	0.381026	3.47433	4.88282	0.032311	0.261694
ENSMUSG00000027940	ENSMUSG00000027940	59069	Tpm3	tropomyosin 3, gamma	-0.238467	6.79674	4.88208	0.0323235	0.261694
ENSMUSG00000040249	ENSMUSG00000040249	16971	Lrp1	low density lipoprotein receptor-related protein 1	0.246211	7.61582	4.8804	0.0323518	0.261694
ENSMUSG00000070697	ENSMUSG00000070697	65961	Utp3	UTP3 small subunit processome component	0.241176	6.09925	4.87915	0.0323728	0.261694
ENSMUSG00000024782	ENSMUSG00000024782	56248	Ak3	adenylate kinase 3	0.386423	7.60318	4.88245	0.0324009	0.261694
ENSMUSG00000025413	ENSMUSG00000025413	72354	Ttc4	tetratricopeptide repeat domain 4	0.250783	4.20625	4.87641	0.0324191	0.261694
ENSMUSG00000049422	ENSMUSG00000049422	103172	Chchd10	coiled-coil-helix-coiled-coil-helix domain containing 10	0.270724	10.0518	4.87012	0.0325253	0.261694
ENSMUSG00000048118	ENSMUSG00000048118	238247	Arid4a	AT rich interactive domain 4A (RBP1-like)	0.331966	5.64295	4.86961	0.0325338	0.261694
ENSMUSG00000038594	ENSMUSG00000038594	100038725	Cep85l	centrosomal protein 85-like	0.507659	3.91383	4.87257	0.0325394	0.261694
ENSMUSG00000023262	ENSMUSG00000023262	109652	Acy1	aminoacylase 1	0.373698	4.40905	4.86884	0.0325469	0.261694
ENSMUSG00000028619	ENSMUSG00000028619	66526	Tceanc2	transcription elongation factor A (SII) N-terminal and central domain containing 2	0.334744	3.54491	4.86577	0.0325989	0.261694
ENSMUSG00000039219	ENSMUSG00000039219	94246	Arid4b	AT rich interactive domain 4B (RBP1-like)	0.287339	5.76151	4.86542	0.0326048	0.261694
ENSMUSG00000027597	ENSMUSG00000027597	269378	Ahcy	S-adenosylhomocysteine hydrolase	0.352788	9.61806	4.8654	0.0326052	0.261694
ENSMUSG00000074254	ENSMUSG00000074254	13086	Cyp2a4	cytochrome P450, family 2, subfamily a, polypeptide 4	-0.914952	4.2429	4.9306	0.0326213	0.261694
ENSMUSG00000034205	ENSMUSG00000034205	94352	Loxl2	lysyl oxidase-like 2	-0.765363	2.32351	4.86278	0.0326498	0.261694
ENSMUSG00000022043	ENSMUSG00000022043	66854	Trim35	tripartite motif-containing 35	-0.611959	2.81543	4.85944	0.0327066	0.261694
ENSMUSG00000026576	ENSMUSG00000026576	11931	Atp1b1	ATPase, Na+/K+ transporting, beta 1 polypeptide	0.235366	6.05901	4.85684	0.032751	0.261694
ENSMUSG00000032218	ENSMUSG00000032218	12442	Ccnb2	cyclin B2	-1.76178	1.27192	4.89576	0.032756	0.261694
ENSMUSG00000040659	ENSMUSG00000040659	27984	Efhd2	EF hand domain containing 2	-0.381924	5.33877	4.85499	0.0327825	0.261694
ENSMUSG00000060244	ENSMUSG00000060244	56009	Alyref2	Aly/REF export factor 2	0.617349	2.05878	4.85143	0.0328434	0.261694
ENSMUSG00000031502	ENSMUSG00000031502	12826	Col4a1	collagen, type IV, alpha 1	-0.618772	5.10859	4.89671	0.0328581	0.261694
ENSMUSG00000031482	ENSMUSG00000031482	18408	Slc25a15	solute carrier family 25 (mitochondrial carrier ornithine transporter), member 15	0.256454	7.63904	4.84767	0.0329078	0.261694
ENSMUSG00000023942	ENSMUSG00000023942	63959	Slc29a1	solute carrier family 29 (nucleoside transporters), member 1	0.339479	6.83725	4.84764	0.0329082	0.261694
ENSMUSG00000008475	ENSMUSG00000008475	67771	Arpc5	actin related protein 2/3 complex, subunit 5	-0.257615	6.21631	4.84715	0.0329166	0.261694
ENSMUSG00000066037	ENSMUSG00000066037	74326	Hnrnpr	heterogeneous nuclear ribonucleoprotein R	0.315461	5.10609	4.84692	0.0329205	0.261694
ENSMUSG00000038695	ENSMUSG00000038695	66124	Josd2	Josephin domain containing 2	0.314917	4.44346	4.84661	0.0329258	0.261694
ENSMUSG00000002289	ENSMUSG00000002289	57875	Angptl4	angiopoietin-like 4	0.325837	6.20976	4.84567	0.032942	0.261694
ENSMUSG00000052595	ENSMUSG00000052595	69865	A1cf	APOBEC1 complementation factor	0.52498	4.83372	4.87008	0.0329519	0.261694
ENSMUSG00000017639	ENSMUSG00000017639	268451	Rab11fip4	RAB11 family interacting protein 4 (class II)	0.738904	1.71015	4.84243	0.0329976	0.261791
ENSMUSG00000036565	ENSMUSG00000036565	78339	Ttyh3	tweety family member 3	-0.512054	2.67539	4.84155	0.0330128	0.261791
ENSMUSG00000070031	ENSMUSG00000070031	434484	Sp140	Sp140 nuclear body protein	-0.70797	2.57083	4.83931	0.0330513	0.261904
ENSMUSG00000028150	ENSMUSG00000028150	19885	Rorc	RAR-related orphan receptor gamma	-0.423359	4.03283	4.83376	0.0331471	0.262404
ENSMUSG00000099974	ENSMUSG00000099974	12047	Bcl2a1d	B cell leukemia/lymphoma 2 related protein A1d	-1.08796	1.81808	4.84139	0.0331633	0.262404
ENSMUSG00000025241	ENSMUSG00000025241	17281	Fyco1	FYVE and coiled-coil domain containing 1	0.243251	5.40493	4.82861	0.0332362	0.262497
ENSMUSG00000038742	ENSMUSG00000038742	70726	Angptl6	angiopoietin-like 6	0.420891	4.24927	4.82847	0.0332386	0.262497
ENSMUSG00000033542	ENSMUSG00000033542	54324	Arhgef5	Rho guanine nucleotide exchange factor (GEF) 5	-0.36781	4.47419	4.82792	0.0332482	0.262497
ENSMUSG00000056749	ENSMUSG00000056749	18030	Nfil3	nuclear factor, interleukin 3, regulated	0.580317	3.34835	4.8248	0.0333407	0.26273
ENSMUSG00000025612	ENSMUSG00000025612	12013	Bach1	BTB and CNC homology 1, basic leucine zipper transcription factor 1	0.376023	4.22505	4.82237	0.0333445	0.26273
ENSMUSG00000032261	ENSMUSG00000032261	212531	Sh3bgrl2	SH3 domain binding glutamic acid-rich protein like 2	-0.328052	5.13021	4.81993	0.0333869	0.26273
ENSMUSG00000058173	ENSMUSG00000058173	170748	Smco4	single-pass membrane protein with coiled-coil domains 4	-0.277706	4.21792	4.81905	0.0334023	0.26273
ENSMUSG00000022708	ENSMUSG00000022708	56490	Zbtb20	zinc finger and BTB domain containing 20	0.208529	9.01537	4.81786	0.0334231	0.26273
ENSMUSG00000020803	ENSMUSG00000020803	52700	Txndc17	thioredoxin domain containing 17	-0.279473	5.83238	4.81751	0.0334292	0.26273
ENSMUSG00000021948	ENSMUSG00000021948	18753	Prkcd	protein kinase C, delta	-0.563064	3.14241	4.81448	0.0334819	0.26273
ENSMUSG00000028309	ENSMUSG00000028309	109331	Rnf20	ring finger protein 20	0.313841	4.61301	4.81222	0.0335214	0.26273
ENSMUSG00000003814	ENSMUSG00000003814	12317	Calr	calreticulin	0.288229	8.78895	4.81134	0.0335368	0.26273
ENSMUSG00000024538	ENSMUSG00000024538	19038	Ppic	peptidylprolyl isomerase C	-1.04317	1.98524	4.82383	0.0335456	0.26273
ENSMUSG00000006527	ENSMUSG00000006527	54650	Sfmbt1	Scm-like with four mbt domains 1	0.30527	4.85489	4.8108	0.0335463	0.26273
ENSMUSG00000023186	ENSMUSG00000023186	67776	Vwa5a	von Willebrand factor A domain containing 5A	-0.304672	3.8577	4.80775	0.0335998	0.262958
ENSMUSG00000030220	ENSMUSG00000030220	11857	Arhgdib	Rho, GDP dissociation inhibitor (GDI) beta	-0.445716	3.34332	4.79992	0.0337373	0.263841
ENSMUSG00000035954	ENSMUSG00000035954	238130	Dock4	dedicator of cytokinesis 4	0.269033	4.52168	4.79854	0.0337617	0.263841
ENSMUSG00000000440	ENSMUSG00000000440	19016	Pparg	peroxisome proliferator activated receptor gamma	-1.14039	3.98668	4.86286	0.033886	0.26462
ENSMUSG00000032271	ENSMUSG00000032271	18113	Nnmt	nicotinamide N-methyltransferase	0.538827	6.04712	4.82688	0.0339821	0.265178
ENSMUSG00000038260	ENSMUSG00000038260	68667	Trpm4	transient receptor potential cation channel, subfamily M, member 4	-1.23946	0.743568	4.78313	0.0340345	0.265395
ENSMUSG00000039041	ENSMUSG00000039041	56436	Adrm1	adhesion regulating molecule 1	0.351174	6.345	4.7804	0.0340829	0.26558
ENSMUSG00000061455	ENSMUSG00000061455	67727	Stx17	syntaxin 17	0.276106	4.62087	4.77897	0.0341085	0.265588
ENSMUSG00000030630	ENSMUSG00000030630	14085	Fah	fumarylacetoacetate hydrolase	0.363006	8.77397	4.76999	0.034269	0.266465
ENSMUSG00000019947	ENSMUSG00000019947	71371	Arid5b	AT rich interactive domain 5B (MRF1-like)	0.714002	6.25236	4.8336	0.0342708	0.266465
ENSMUSG00000027035	ENSMUSG00000027035	241447	Cers6	ceramide synthase 6	-0.44644	3.19901	4.76166	0.0344185	0.267421
ENSMUSG00000022201	ENSMUSG00000022201	22763	Zfr	zinc finger RNA binding protein	0.261817	6.45085	4.75955	0.0344565	0.267522
ENSMUSG00000024188	ENSMUSG00000024188	66978	Luc7l	Luc7-like	0.259529	5.29753	4.75689	0.0345045	0.267702
ENSMUSG00000028671	ENSMUSG00000028671	74246	Gale	galactose-4-epimerase, UDP	-0.751511	4.88184	4.81258	0.0345648	0.267977
ENSMUSG00000018474	ENSMUSG00000018474	216848	Chd3	chromodomain helicase DNA binding protein 3	0.374798	6.5257	4.75294	0.0346319	0.268304
ENSMUSG00000037669	ENSMUSG00000037669	68832	Ldah	lipid droplet associated hydrolase	0.320803	4.65094	4.74267	0.034762	0.268942
ENSMUSG00000070473	ENSMUSG00000070473	12739	Cldn3	claudin 3	0.261005	6.68166	4.74255	0.0347643	0.268942
ENSMUSG00000036985	ENSMUSG00000036985	208884	Zdhhc9	zinc finger, DHHC domain containing 9	0.335895	6.28205	4.73705	0.0348644	0.269523
ENSMUSG00000079020	ENSMUSG00000079020	106068	Slc45a4	solute carrier family 45, member 4	-0.529505	2.9759	4.73251	0.0349474	0.269813
ENSMUSG00000050730	ENSMUSG00000050730	71544	Arhgap42	Rho GTPase activating protein 42	0.356408	5.46658	4.73225	0.0349521	0.269813
ENSMUSG00000034785	ENSMUSG00000034785	13370	Dio1	deiodinase, iodothyronine, type I	-0.287712	7.11822	4.73025	0.0349888	0.269823
ENSMUSG00000026343	ENSMUSG00000026343	71111	Gpr39	G protein-coupled receptor 39	-0.590817	1.75708	4.72944	0.0350036	0.269823
ENSMUSG00000024142	ENSMUSG00000024142	56716	Mlst8	MTOR associated protein, LST8 homolog (S. cerevisiae)	-0.379811	2.89505	4.72552	0.0350755	0.269885
ENSMUSG00000022401	ENSMUSG00000022401	321003	Xpnpep3	X-prolyl aminopeptidase 3, mitochondrial	0.396361	3.74995	4.72487	0.0350876	0.269885
ENSMUSG00000001435	ENSMUSG00000001435	12822	Col18a1	collagen, type XVIII, alpha 1	0.250535	8.58756	4.72344	0.0351138	0.269885
ENSMUSG00000026832	ENSMUSG00000026832	227929	Cytip	cytohesin 1 interacting protein	-1.14995	0.793839	4.7224	0.0351329	0.269885
ENSMUSG00000020183	ENSMUSG00000020183	70574	Cpm	carboxypeptidase M	0.560555	1.46967	4.72218	0.0351369	0.269885
ENSMUSG00000041736	ENSMUSG00000041736	12257	Tspo	translocator protein	-0.254011	6.26018	4.72017	0.035174	0.269977
ENSMUSG00000048222	ENSMUSG00000048222	100034361	Mfap1b	microfibrillar-associated protein 1B	0.379221	4.64627	4.71661	0.0352396	0.270288
ENSMUSG00000041515	ENSMUSG00000041515	15900	Irf8	interferon regulatory factor 8	-0.521924	4.3071	4.73038	0.0352711	0.270336
ENSMUSG00000048126	ENSMUSG00000048126	12835	Col6a3	collagen, type VI, alpha 3	-1.12584	4.07854	4.77722	0.0353973	0.270974
ENSMUSG00000019806	ENSMUSG00000019806	66253	Aig1	androgen-induced 1	-0.328447	4.17329	4.7077	0.0354046	0.270974
ENSMUSG00000030717	ENSMUSG00000030717	56312	Nupr1	nuclear protein transcription regulator 1	-1.14788	1.83601	4.71543	0.0355561	0.271826
ENSMUSG00000060152	ENSMUSG00000060152	117109	Pop5	processing of precursor 5, ribonuclease P/MRP family (S. cerevisiae)	0.345054	4.78407	4.699	0.0355665	0.271826
ENSMUSG00000006360	ENSMUSG00000006360	12925	Crip1	cysteine-rich protein 1 (intestinal)	-0.637737	2.92884	4.69689	0.0356057	0.271933
ENSMUSG00000057101	ENSMUSG00000057101	210135	Zfp180	zinc finger protein 180	0.389576	3.74209	4.68883	0.0357567	0.272892
ENSMUSG00000026097	ENSMUSG00000026097	227102	Ormdl1	ORM1-like 1 (S. cerevisiae)	0.341643	4.3755	4.68549	0.0358193	0.273176
ENSMUSG00000024180	ENSMUSG00000024180	60455	Tmem8	transmembrane protein 8	-0.323343	4.22602	4.68398	0.0358477	0.273199
ENSMUSG00000063354	ENSMUSG00000063354	72027	Slc39a4	solute carrier family 39 (zinc transporter), member 4	-0.633536	5.24215	4.72562	0.0359848	0.27405
ENSMUSG00000032333	ENSMUSG00000032333	69106	Stoml1	stomatin-like 1	-0.54458	2.62174	4.6752	0.0360134	0.274073
ENSMUSG00000002028	ENSMUSG00000002028	214162	Kmt2a	lysine (K)-specific methyltransferase 2A	0.30432	5.4463	4.66936	0.0361239	0.27472
ENSMUSG00000034993	ENSMUSG00000034993	26949	Vat1	vesicle amine transport 1	-0.501294	3.05578	4.66425	0.0362208	0.275263
ENSMUSG00000031134	ENSMUSG00000031134	19655	Rbmx	RNA binding motif protein, X chromosome	-0.457433	2.64026	4.66171	0.0362692	0.275436
ENSMUSG00000024863	ENSMUSG00000024863	17195	Mbl2	mannose-binding lectin (protein C) 2	-0.282931	8.64557	4.65829	0.0363345	0.275573
ENSMUSG00000027671	ENSMUSG00000027671	56456	Actl6a	actin-like 6A	0.305438	3.96614	4.65808	0.0363384	0.275573
ENSMUSG00000024427	ENSMUSG00000024427	24066	Spry4	sprouty RTK signaling antagonist 4	0.936625	1.48211	4.65561	0.0363857	0.275612
ENSMUSG00000028124	ENSMUSG00000028124	14630	Gclm	glutamate-cysteine ligase, modifier subunit	0.196218	7.19389	4.65513	0.0363948	0.275612
ENSMUSG00000020448	ENSMUSG00000020448	193670	Rnf185	ring finger protein 185	0.383901	4.23722	4.65268	0.0364418	0.275774
ENSMUSG00000017478	ENSMUSG00000017478	76014	Zc3h18	zinc finger CCCH-type containing 18	0.236461	5.38152	4.64388	0.0366106	0.27635
ENSMUSG00000031504	ENSMUSG00000031504	19332	Rab20	RAB20, member RAS oncogene family	-0.569101	2.43989	4.64288	0.0366298	0.27635
ENSMUSG00000027253	ENSMUSG00000027253	228357	Lrp4	low density lipoprotein receptor-related protein 4	-0.487013	2.85798	4.63939	0.0366971	0.27635
ENSMUSG00000040270	ENSMUSG00000040270	12014	Bach2	BTB and CNC homology, basic leucine zipper transcription factor 2	0.478186	3.82093	4.63922	0.0367004	0.27635
ENSMUSG00000038174	ENSMUSG00000038174	213056	Fam126b	family with sequence similarity 126, member B	0.322956	6.1295	4.63884	0.0367077	0.27635
ENSMUSG00000015890	ENSMUSG00000015890	71761	Amdhd1	amidohydrolase domain containing 1	0.308068	7.09861	4.63601	0.0367624	0.27635
ENSMUSG00000066735	ENSMUSG00000066735	69568	Vkorc1l1	vitamin K epoxide reductase complex, subunit 1-like 1	-0.414573	4.36414	4.63586	0.0367652	0.27635
ENSMUSG00000022280	ENSMUSG00000022280	30945	Rnf19a	ring finger protein 19A	0.440427	2.9909	4.63579	0.0367667	0.27635
ENSMUSG00000030446	ENSMUSG00000030446	212569	Zfp273	zinc finger protein 273	0.58618	1.45683	4.63542	0.0367737	0.27635
ENSMUSG00000028248	ENSMUSG00000028248	66625	Pnisr	PNN interacting serine/arginine-rich	0.263423	6.54379	4.63525	0.0367772	0.27635
ENSMUSG00000023886	ENSMUSG00000023886	64074	Smoc2	SPARC related modular calcium binding 2	-0.97353	3.05805	4.68026	0.0368065	0.27635
ENSMUSG00000025583	ENSMUSG00000025583	74370	Rptor	regulatory associated protein of MTOR, complex 1	-0.296402	3.61772	4.63271	0.0368262	0.27635
ENSMUSG00000033684	ENSMUSG00000033684	104009	Qsox1	quiescin Q6 sulfhydryl oxidase 1	0.279567	8.26046	4.62908	0.0368967	0.276403
ENSMUSG00000025743	ENSMUSG00000025743	20970	Sdc3	syndecan 3	-0.388527	4.55828	4.62752	0.0369268	0.276403
ENSMUSG00000025586	ENSMUSG00000025586	12877	Cpeb1	cytoplasmic polyadenylation element binding protein 1	-0.568932	3.07146	4.62722	0.0369327	0.276403
ENSMUSG00000051615	ENSMUSG00000051615	76108	Rap2a	RAS related protein 2a	0.37895	4.03724	4.62706	0.0369359	0.276403
ENSMUSG00000021188	ENSMUSG00000021188	109181	Trip11	thyroid hormone receptor interactor 11	0.296152	4.68071	4.62261	0.0370224	0.276586
ENSMUSG00000036083	ENSMUSG00000036083	105355	Slc17a3	solute carrier family 17 (sodium phosphate), member 3	0.328154	5.42103	4.62254	0.0370238	0.276586
ENSMUSG00000022412	ENSMUSG00000022412	239555	Mief1	mitochondrial elongation factor 1	0.279552	3.96895	4.6208	0.0370578	0.276586
ENSMUSG00000005534	ENSMUSG00000005534	16337	Insr	insulin receptor	0.29082	5.60323	4.61953	0.0370825	0.276586
ENSMUSG00000000673	ENSMUSG00000000673	107766	Haao	3-hydroxyanthranilate 3,4-dioxygenase	0.305056	8.40392	4.6185	0.0371026	0.276586
ENSMUSG00000030161	ENSMUSG00000030161	57436	Gabarapl1	gamma-aminobutyric acid (GABA) A receptor-associated protein-like 1	0.336078	8.65683	4.61788	0.0371147	0.276586
ENSMUSG00000036606	ENSMUSG00000036606	140570	Plxnb2	plexin B2	0.225817	6.10497	4.61618	0.0371479	0.276643
ENSMUSG00000021557	ENSMUSG00000021557	67269	Agtpbp1	ATP/GTP binding protein 1	-0.346843	3.75536	4.61393	0.0371919	0.276778
ENSMUSG00000006715	ENSMUSG00000006715	57441	Gmnn	geminin	-0.532742	2.79446	4.61221	0.0372257	0.276839
ENSMUSG00000035780	ENSMUSG00000035780	72094	Ugt2a3	UDP glucuronosyltransferase 2 family, polypeptide A3	0.354658	7.33436	4.60877	0.0372931	0.277148
ENSMUSG00000027184	ENSMUSG00000027184	53872	Caprin1	cell cycle associated protein 1	0.323787	6.96292	4.60373	0.0373922	0.277531
ENSMUSG00000038374	ENSMUSG00000038374	60365	Rbm8a	RNA binding motif protein 8a	0.356353	6.84915	4.60353	0.0373961	0.277531
ENSMUSG00000097589	ENSMUSG00000097589	668253	Dleu2	deleted in lymphocytic leukemia, 2	0.381451	4.11224	4.59358	0.0375926	0.278797
ENSMUSG00000020231	ENSMUSG00000020231	64451	Dip2a	disco interacting protein 2 homolog A	-1.05642	0.940405	4.59002	0.0376631	0.279127
ENSMUSG00000074916	ENSMUSG00000074916	72136	Chst14	carbohydrate sulfotransferase 14	-0.918752	1.32283	4.58559	0.0377512	0.279587
ENSMUSG00000044068	ENSMUSG00000044068	22183	Zrsr1	zinc finger (CCCH type), RNA binding motif and serine/arginine rich 1	0.340453	4.54669	4.58182	0.0378263	0.279638
ENSMUSG00000029716	ENSMUSG00000029716	50765	Tfr2	transferrin receptor 2	0.256608	6.9435	4.58036	0.0378554	0.279638
ENSMUSG00000006736	ENSMUSG00000006736	67125	Tspan31	tetraspanin 31	-0.351794	6.65164	4.57947	0.0378731	0.279638
ENSMUSG00000056069	ENSMUSG00000056069	223433	Otulinl	OTU deubiquitinase with linear linkage specificity like	-0.930308	0.894289	4.57794	0.0379038	0.279638
ENSMUSG00000026158	ENSMUSG00000026158	70155	Ogfrl1	opioid growth factor receptor-like 1	0.317511	4.59831	4.57766	0.0379093	0.279638
ENSMUSG00000048668	ENSMUSG00000048668	72440	Rhno1	RAD9-HUS1-RAD1 interacting nuclear orphan 1	-0.482805	2.48976	4.57584	0.0379458	0.279638
ENSMUSG00000024002	ENSMUSG00000024002	57261	Brd4	bromodomain containing 4	0.341682	5.96655	4.57405	0.0379815	0.279638
ENSMUSG00000064254	ENSMUSG00000064254	66071	Ethe1	ethylmalonic encephalopathy 1	0.249006	6.54041	4.57368	0.037989	0.279638
ENSMUSG00000022822	ENSMUSG00000022822	27416	Abcc5	ATP-binding cassette, sub-family C (CFTR/MRP), member 5	-0.636679	2.15857	4.57354	0.0379918	0.279638
ENSMUSG00000030852	ENSMUSG00000030852	57752	Tacc2	transforming, acidic coiled-coil containing protein 2	-0.335967	4.67253	4.56986	0.0380655	0.279853
ENSMUSG00000070436	ENSMUSG00000070436	12406	Serpinh1	serine (or cysteine) peptidase inhibitor, clade H, member 1	-0.87084	3.38493	4.61456	0.0380731	0.279853
ENSMUSG00000059796	ENSMUSG00000059796	13681	Eif4a1	eukaryotic translation initiation factor 4A1	-0.249713	6.74508	4.56465	0.0381703	0.280287
ENSMUSG00000021282	ENSMUSG00000021282	217869	Eif5	eukaryotic translation initiation factor 5	0.195614	8.36836	4.56389	0.0381855	0.280287
ENSMUSG00000004268	ENSMUSG00000004268	14791	Emg1	EMG1 N1-specific pseudouridine methyltransferase	0.302945	4.89903	4.56266	0.0382103	0.280287
ENSMUSG00000040616	ENSMUSG00000040616	214359	Tmem51	transmembrane protein 51	-0.511484	2.83748	4.5596	0.038272	0.280549
ENSMUSG00000069516	ENSMUSG00000069516	17105	Lyz2	lysozyme 2	-0.698606	6.21401	4.61357	0.0383575	0.280763
ENSMUSG00000030207	ENSMUSG00000030207	74525	Fam234b	family with sequence similarity 234, member B	0.478733	3.12699	4.55476	0.0383701	0.280763
ENSMUSG00000040268	ENSMUSG00000040268	101476	Plekha1	pleckstrin homology domain containing, family A (phosphoinositide binding specific) member 1	-0.457542	4.11576	4.55398	0.0383857	0.280763
ENSMUSG00000017713	ENSMUSG00000017713	71776	Tha1	threonine aldolase 1	-0.705591	1.67625	4.55146	0.0384368	0.280763
ENSMUSG00000028919	ENSMUSG00000028919	213649	Arhgef19	Rho guanine nucleotide exchange factor (GEF) 19	0.281256	4.70835	4.55051	0.0384562	0.280763
ENSMUSG00000026701	ENSMUSG00000026701	11758	Prdx6	peroxiredoxin 6	0.232685	9.35827	4.55043	0.0384578	0.280763
ENSMUSG00000034154	ENSMUSG00000034154	68142	Ino80	INO80 complex subunit	0.428681	4.12592	4.54908	0.0384852	0.280772
ENSMUSG00000022682	ENSMUSG00000022682	106298	Rrn3	RRN3 RNA polymerase I transcription factor homolog (yeast)	0.470708	3.49133	4.54699	0.0385277	0.280892
ENSMUSG00000048911	ENSMUSG00000048911	51902	Rnf24	ring finger protein 24	-0.734516	1.78562	4.5441	0.0385866	0.28111
ENSMUSG00000075552	ENSMUSG00000075552	100041375	Cyp3a41b	cytochrome P450, family 3, subfamily a, polypeptide 41B	-0.982831	1.5455	4.54295	0.0386099	0.28111
ENSMUSG00000019960	ENSMUSG00000019960	67603	Dusp6	dual specificity phosphatase 6	-0.493565	5.50796	4.56847	0.0386384	0.281128
ENSMUSG00000024381	ENSMUSG00000024381	30948	Bin1	bridging integrator 1	-0.40561	3.31476	4.5363	0.0387458	0.281479
ENSMUSG00000024371	ENSMUSG00000024371	12263	C2	complement component 2 (within H-2S)	0.263322	5.60222	4.53466	0.0387794	0.281479
ENSMUSG00000062785	ENSMUSG00000062785	16504	Kcnc3	potassium voltage gated channel, Shaw-related subfamily, member 3	0.607839	1.6065	4.53421	0.0387886	0.281479
ENSMUSG00000034771	ENSMUSG00000034771	21886	Tle2	transducin-like enhancer of split 2	0.731283	1.36645	4.53408	0.0387913	0.281479
ENSMUSG00000079017	ENSMUSG00000079017	76933	Ifi27l2a	interferon, alpha-inducible protein 27 like 2A	-0.801733	3.21676	4.55334	0.039019	0.282756
ENSMUSG00000034007	ENSMUSG00000034007	244891	Scaper	S phase cyclin A-associated protein in the ER	0.390128	4.26822	4.52296	0.0390198	0.282756
ENSMUSG00000017631	ENSMUSG00000017631	109934	Abr	active BCR-related gene	-0.771832	1.86556	4.52032	0.0390743	0.282935
ENSMUSG00000022003	ENSMUSG00000022003	67554	Slc25a30	solute carrier family 25, member 30	0.626489	6.41411	4.57145	0.0390971	0.282935
ENSMUSG00000022762	ENSMUSG00000022762	17968	Ncam2	neural cell adhesion molecule 2	0.808596	1.77369	4.51333	0.039219	0.283582
ENSMUSG00000052915	ENSMUSG00000052915	74026	Msl1	male specific lethal 1	0.247243	5.62237	4.51235	0.0392392	0.283582
ENSMUSG00000032883	ENSMUSG00000032883	74205	Acsl3	acyl-CoA synthetase long-chain family member 3	-0.445824	4.76851	4.51848	0.0392693	0.283609
ENSMUSG00000026112	ENSMUSG00000026112	76178	Coa5	cytochrome C oxidase assembly factor 5	-0.225667	5.80798	4.50783	0.0393333	0.283869
ENSMUSG00000047473	ENSMUSG00000047473	22693	Zfp30	zinc finger protein 30	0.56601	2.53671	4.50612	0.0393688	0.283869
ENSMUSG00000053219	ENSMUSG00000053219	379043	Raet1e	retinoic acid early transcript 1E	-0.712561	2.39785	4.50537	0.0393845	0.283869
ENSMUSG00000028977	ENSMUSG00000028977	69743	Casz1	castor zinc finger 1	-0.792639	1.33828	4.50125	0.0394703	0.284297
ENSMUSG00000003233	ENSMUSG00000003233	13544	Dvl3	dishevelled segment polarity protein 3	0.377948	3.54496	4.49661	0.0395673	0.2845
ENSMUSG00000032040	ENSMUSG00000032040	69305	Dcps	decapping enzyme, scavenger	0.350916	3.62145	4.49637	0.0395724	0.2845
ENSMUSG00000037475	ENSMUSG00000037475	331401	Thoc2	THO complex 2	0.230386	6.2272	4.49611	0.0395778	0.2845
ENSMUSG00000022897	ENSMUSG00000022897	13548	Dyrk1a	dual-specificity tyrosine-(Y)-phosphorylation regulated kinase 1a	0.247614	4.47101	4.49416	0.0396188	0.284605
ENSMUSG00000008763	ENSMUSG00000008763	17156	Man1a2	mannosidase, alpha, class 1A, member 2	0.26778	5.34236	4.48941	0.0397185	0.284975
ENSMUSG00000020832	ENSMUSG00000020832	57837	Eral1	Era (G-protein)-like 1 (E. coli)	0.410603	2.97831	4.48918	0.0397233	0.284975
ENSMUSG00000030067	ENSMUSG00000030067	108655	Foxp1	forkhead box P1	0.246986	5.91755	4.48326	0.0398479	0.285679
ENSMUSG00000024924	ENSMUSG00000024924	22359	Vldlr	very low density lipoprotein receptor	-0.736382	2.75587	4.48789	0.0399915	0.285988
ENSMUSG00000030200	ENSMUSG00000030200	66813	Bcl2l14	BCL2-like 14 (apoptosis facilitator)	-1.06114	0.615766	4.47642	0.0399926	0.285988
ENSMUSG00000022892	ENSMUSG00000022892	11820	App	amyloid beta (A4) precursor protein	-0.433142	5.57063	4.4905	0.0399929	0.285988
ENSMUSG00000032238	ENSMUSG00000032238	19883	Rora	RAR-related orphan receptor alpha	0.228439	6.48461	4.47619	0.0399974	0.285988
ENSMUSG00000024251	ENSMUSG00000024251	240174	Thada	thyroid adenoma associated	0.445946	2.77111	4.47319	0.040061	0.286253
ENSMUSG00000041124	ENSMUSG00000041124	78100	Msantd4	Myb/SANT-like DNA-binding domain containing 4 with coiled-coils	-0.342188	4.30851	4.47002	0.0401285	0.286416
ENSMUSG00000026705	ENSMUSG00000026705	226541	Klhl20	kelch-like 20	0.496495	2.84738	4.46961	0.0401372	0.286416
ENSMUSG00000031176	ENSMUSG00000031176	67117	Dynlt3	dynein light chain Tctex-type 3	-0.183417	6.94453	4.46756	0.0401808	0.286538
ENSMUSG00000022193	ENSMUSG00000022193	19173	Psmb5	proteasome (prosome, macropain) subunit, beta type 5	-0.22594	6.93072	4.46562	0.040222	0.286642
ENSMUSG00000032316	ENSMUSG00000032316	102414	Clk3	CDC-like kinase 3	0.35376	4.46135	4.46211	0.040297	0.286986
ENSMUSG00000000567	ENSMUSG00000000567	20682	Sox9	SRY (sex determining region Y)-box 9	0.47073	4.65772	4.46356	0.0405265	0.288007
ENSMUSG00000026288	ENSMUSG00000026288	16331	Inpp5d	inositol polyphosphate-5-phosphatase D	-0.556143	1.99882	4.44905	0.0405769	0.288007
ENSMUSG00000054422	ENSMUSG00000054422	14080	Fabp1	fatty acid binding protein 1, liver	-0.376091	12.4245	4.44879	0.0405825	0.288007
ENSMUSG00000033411	ENSMUSG00000033411	329506	Ctdspl2	CTD (carboxy-terminal domain, RNA polymerase II, polypeptide A) small phosphatase like 2	0.447476	2.95159	4.44873	0.0405838	0.288007
ENSMUSG00000030397	ENSMUSG00000030397	232944	Mark4	MAP/microtubule affinity regulating kinase 4	0.400742	3.6235	4.44779	0.0406041	0.288007
ENSMUSG00000021540	ENSMUSG00000021540	17129	Smad5	SMAD family member 5	0.277719	5.1482	4.44665	0.0406286	0.288007
ENSMUSG00000052934	ENSMUSG00000052934	76454	Fbxo31	F-box protein 31	0.415487	5.10333	4.45168	0.0406429	0.288007
ENSMUSG00000015095	ENSMUSG00000015095	30839	Fbxw5	F-box and WD-40 domain protein 5	-0.360801	4.19959	4.44509	0.0406622	0.288007
ENSMUSG00000018143	ENSMUSG00000018143	17135	Mafk	v-maf musculoaponeurotic fibrosarcoma oncogene family, protein K (avian)	-0.462069	3.29628	4.4431	0.0407052	0.288007
ENSMUSG00000047822	ENSMUSG00000047822	624219	Angptl8	angiopoietin-like 8	0.52436	4.2205	4.45958	0.040708	0.288007
ENSMUSG00000032387	ENSMUSG00000032387	71973	Rbpms2	RNA binding protein with multiple splicing 2	0.254562	6.16653	4.44122	0.0407459	0.288086
ENSMUSG00000036323	ENSMUSG00000036323	66661	Srp72	signal recognition particle 72	0.168938	6.92491	4.43656	0.0408467	0.288459
ENSMUSG00000037936	ENSMUSG00000037936	20778	Scarb1	scavenger receptor class B, member 1	0.395612	7.0021	4.44752	0.0408712	0.288459
ENSMUSG00000064181	ENSMUSG00000064181	216363	Rab3ip	RAB3A interacting protein	0.278325	4.38027	4.43434	0.0408948	0.288459
ENSMUSG00000041777	ENSMUSG00000041777	66935	Cir1	corepressor interacting with RBPJ, 1	0.235639	6.24139	4.43368	0.0409092	0.288459
ENSMUSG00000067768	ENSMUSG00000067768	27083	Xlr4b	X-linked lymphocyte-regulated 4B	-1.33104	0.905892	4.44137	0.0409326	0.288459
ENSMUSG00000004642	ENSMUSG00000004642	20492	Slbp	stem-loop binding protein	-0.482859	3.40721	4.4301	0.040987	0.288653
ENSMUSG00000036813	ENSMUSG00000036813	72090	Entpd8	ectonucleoside triphosphate diphosphohydrolase 8	0.324612	5.10902	4.42371	0.0411263	0.289444
ENSMUSG00000035623	ENSMUSG00000035623	233532	Rsf1	remodeling and spacing factor 1	0.286792	4.90706	4.4193	0.0412227	0.289933
ENSMUSG00000075376	ENSMUSG00000075376	319817	Rc3h2	ring finger and CCCH-type zinc finger domains 2	0.267058	4.64377	4.41215	0.0413796	0.290847
ENSMUSG00000031016	ENSMUSG00000031016	22390	Wee1	WEE 1 homolog 1 (S. pombe)	-0.716106	3.42035	4.43734	0.0414316	0.291022
ENSMUSG00000026915	ENSMUSG00000026915	20744	Strbp	spermatid perinuclear RNA binding protein	0.318423	6.4999	4.40792	0.0414727	0.29112
ENSMUSG00000020585	ENSMUSG00000020585	17775	Laptm4a	lysosomal-associated protein transmembrane 4A	-0.214655	7.81719	4.40564	0.0415229	0.291283
ENSMUSG00000043962	ENSMUSG00000043962	230753	Thrap3	thyroid hormone receptor associated protein 3	0.206543	5.90992	4.40421	0.0415544	0.291314
ENSMUSG00000031776	ENSMUSG00000031776	107566	Arl2bp	ADP-ribosylation factor-like 2 binding protein	-0.637137	2.97157	4.4057	0.0416117	0.291478
ENSMUSG00000029267	ENSMUSG00000029267	17765	Mtf2	metal response element binding transcription factor 2	0.34639	3.31494	4.40071	0.0416319	0.291478
ENSMUSG00000073424	ENSMUSG00000073424	106648	Cyp4f15	cytochrome P450, family 4, subfamily f, polypeptide 15	0.341315	6.96595	4.39946	0.0416596	0.291481
ENSMUSG00000022820	ENSMUSG00000022820	68194	Ndufb4	NADH:ubiquinone oxidoreductase subunit B4	-0.251923	7.11177	4.38894	0.0418933	0.292739
ENSMUSG00000006378	ENSMUSG00000006378	26912	Gcat	glycine C-acetyltransferase (2-amino-3-ketobutyrate-coenzyme A ligase)	0.278539	5.80673	4.38892	0.0418937	0.292739
ENSMUSG00000001642	ENSMUSG00000001642	11677	Akr1b3	aldo-keto reductase family 1, member B3 (aldose reductase)	-0.499701	3.27882	4.38697	0.041937	0.292826
ENSMUSG00000012519	ENSMUSG00000012519	74568	Mlkl	mixed lineage kinase domain-like	-0.859276	1.5258	4.38491	0.0419832	0.292826
ENSMUSG00000044791	ENSMUSG00000044791	235626	Setd2	SET domain containing 2	0.218299	5.49413	4.38402	0.042003	0.292826
ENSMUSG00000021792	ENSMUSG00000021792	70564	Prxl2a	peroxiredoxin like 2A	-0.263205	5.68992	4.38348	0.042015	0.292826
ENSMUSG00000054723	ENSMUSG00000054723	106639	Vmac	vimentin-type intermediate filament associated coiled-coil protein	-0.434006	3.39958	4.37838	0.0421293	0.293259
ENSMUSG00000000532	ENSMUSG00000000532	11479	Acvr1b	activin A receptor, type 1B	-0.539146	2.84413	4.37758	0.0421472	0.293259
ENSMUSG00000074182	ENSMUSG00000074182	229937	Znhit6	zinc finger, HIT type 6	0.488535	3.33541	4.37585	0.0421861	0.293259
ENSMUSG00000090935	ENSMUSG00000090935	24071	Synj2bp	synaptojanin 2 binding protein	0.200146	6.10687	4.37554	0.0421929	0.293259
ENSMUSG00000075551	ENSMUSG00000075551	53973	Cyp3a41a	cytochrome P450, family 3, subfamily a, polypeptide 41A	-0.965124	1.55142	4.37189	0.042275	0.293259
ENSMUSG00000024073	ENSMUSG00000024073	12211	Birc6	baculoviral IAP repeat-containing 6	0.224478	6.48619	4.37096	0.0422959	0.293259
ENSMUSG00000039529	ENSMUSG00000039529	54670	Atp8b1	ATPase, class I, type 8B, member 1	0.27072	4.92448	4.37094	0.0422964	0.293259
ENSMUSG00000029178	ENSMUSG00000029178	16599	Klf3	Kruppel-like factor 3 (basic)	0.287098	5.78542	4.37031	0.0423105	0.293259
ENSMUSG00000029461	ENSMUSG00000029461	319604	Fam168a	family with sequence similarity 168, member A	0.252448	4.79264	4.36922	0.0423351	0.293259
ENSMUSG00000049858	ENSMUSG00000049858	211389	Suox	sulfite oxidase	0.346495	5.31918	4.36858	0.0423496	0.293259
ENSMUSG00000031360	ENSMUSG00000031360	55936	Ctps2	cytidine 5'-triphosphate synthase 2	-0.597299	2.51172	4.36644	0.0423978	0.293263
ENSMUSG00000028879	ENSMUSG00000028879	100226	Stx12	syntaxin 12	-0.255019	4.43275	4.36584	0.0424114	0.293263
ENSMUSG00000039208	ENSMUSG00000039208	210029	Metrnl	meteorin, glial cell differentiation regulator-like	-0.813723	1.95863	4.36383	0.0424567	0.293263
ENSMUSG00000050953	ENSMUSG00000050953	14609	Gja1	gap junction protein, alpha 1	-0.580125	2.13947	4.36372	0.0424593	0.293263
ENSMUSG00000063849	ENSMUSG00000063849	66812	Ppcdc	phosphopantothenoylcysteine decarboxylase	-0.345248	3.26618	4.35803	0.0425881	0.293964
ENSMUSG00000057342	ENSMUSG00000057342	56632	Sphk2	sphingosine kinase 2	0.318686	5.99925	4.35542	0.0426473	0.294185
ENSMUSG00000053886	ENSMUSG00000053886	72281	Sh2d4a	SH2 domain containing 4A	-0.633873	2.39277	4.35173	0.0427312	0.294574
ENSMUSG00000064247	ENSMUSG00000064247	403178	Plcxd1	phosphatidylinositol-specific phospholipase C, X domain containing 1	-1.12008	0.830534	4.34978	0.0427757	0.294647
ENSMUSG00000018076	ENSMUSG00000018076	76199	Med13l	mediator complex subunit 13-like	0.249662	4.72627	4.34887	0.0427965	0.294647
ENSMUSG00000030034	ENSMUSG00000030034	70020	Ino80b	INO80 complex subunit B	0.39767	4.06228	4.34681	0.0428435	0.294782
ENSMUSG00000025270	ENSMUSG00000025270	11656	Alas2	aminolevulinic acid synthase 2, erythroid	0.340876	5.94412	4.34504	0.0428839	0.294871
ENSMUSG00000042429	ENSMUSG00000042429	11539	Adora1	adenosine A1 receptor	-0.31247	5.70757	4.33942	0.0430125	0.295189
ENSMUSG00000038180	ENSMUSG00000038180	245865	Spag4	sperm associated antigen 4	-1.00553	1.19768	4.33906	0.0430207	0.295189
ENSMUSG00000038034	ENSMUSG00000038034	140559	Igsf8	immunoglobulin superfamily, member 8	-0.427229	3.46335	4.33522	0.0431089	0.295189
ENSMUSG00000029499	ENSMUSG00000029499	19301	Pxmp2	peroxisomal membrane protein 2	0.33301	7.54763	4.33445	0.0431266	0.295189
ENSMUSG00000024254	ENSMUSG00000024254	67470	Abcg8	ATP binding cassette subfamily G member 8	0.349859	5.6829	4.3338	0.0431416	0.295189
ENSMUSG00000020444	ENSMUSG00000020444	14923	Guk1	guanylate kinase 1	-0.305537	5.28177	4.33344	0.0431499	0.295189
ENSMUSG00000078945	ENSMUSG00000078945	17948	Naip2	NLR family, apoptosis inhibitory protein 2	-0.650126	1.95698	4.33288	0.0431628	0.295189
ENSMUSG00000021273	ENSMUSG00000021273	14137	Fdft1	farnesyl diphosphate farnesyl transferase 1	-0.421693	6.21821	4.34834	0.0431837	0.295189
ENSMUSG00000059248	ENSMUSG00000059248	53860	Sept9	septin 9	-0.361276	3.96023	4.33178	0.0431881	0.295189
ENSMUSG00000054237	ENSMUSG00000054237	70567	Fra10ac1	FRA10AC1 homolog (human)	0.322174	4.27041	4.33107	0.0432045	0.295189
ENSMUSG00000022544	ENSMUSG00000022544	70511	Eef2kmt	eukaryotic elongation factor 2 lysine methyltransferase	-0.45502	2.92758	4.32959	0.0432386	0.29521
ENSMUSG00000021699	ENSMUSG00000021699	238871	Pde4d	phosphodiesterase 4D, cAMP specific	-0.614326	2.2789	4.32856	0.0432623	0.29521
ENSMUSG00000020741	ENSMUSG00000020741	74148	Cluh	clustered mitochondria (cluA/CLU1) homolog	0.229852	7.71064	4.32457	0.0433545	0.295651
ENSMUSG00000027961	ENSMUSG00000027961	109245	Lrrc39	leucine rich repeat containing 39	-0.865823	1.82557	4.32164	0.0434223	0.295908
ENSMUSG00000003435	ENSMUSG00000003435	20924	Supt5	suppressor of Ty 5	0.264369	4.87712	4.32057	0.0434472	0.295908
ENSMUSG00000028967	ENSMUSG00000028967	74155	Errfi1	ERBB receptor feedback inhibitor 1	0.550141	7.77601	4.35842	0.043542	0.296366
ENSMUSG00000036880	ENSMUSG00000036880	52538	Acaa2	acetyl-Coenzyme A acyltransferase 2 (mitochondrial 3-oxoacyl-Coenzyme A thiolase)	0.238066	9.90409	4.31247	0.0436353	0.296814
ENSMUSG00000064351	ENSMUSG00000064351	17708	COX1	cytochrome c oxidase subunit I	-0.544934	13.0182	4.32981	0.0438015	0.297756
ENSMUSG00000031490	ENSMUSG00000031490	13685	Eif4ebp1	eukaryotic translation initiation factor 4E binding protein 1	-0.254649	5.85324	4.30176	0.0438855	0.298139
ENSMUSG00000004099	ENSMUSG00000004099	13433	Dnmt1	DNA methyltransferase (cytosine-5) 1	-0.455852	2.78236	4.2967	0.0440045	0.298758
ENSMUSG00000026360	ENSMUSG00000026360	19735	Rgs2	regulator of G-protein signaling 2	-0.57489	4.19312	4.31669	0.0441064	0.29892
ENSMUSG00000026585	ENSMUSG00000026585	16579	Kifap3	kinesin-associated protein 3	-0.397909	3.13692	4.29187	0.0441181	0.29892
ENSMUSG00000017716	ENSMUSG00000017716	11799	Birc5	baculoviral IAP repeat-containing 5	-0.965726	1.79828	4.29545	0.0441183	0.29892
ENSMUSG00000035237	ENSMUSG00000035237	16816	Lcat	lecithin cholesterol acyltransferase	0.359541	7.48224	4.29456	0.0441393	0.29892
ENSMUSG00000051910	ENSMUSG00000051910	20679	Sox6	SRY (sex determining region Y)-box 6	0.346236	4.14353	4.28722	0.0442279	0.299204
ENSMUSG00000026365	ENSMUSG00000026365	12628	Cfh	complement component factor h	0.328754	7.75733	4.28684	0.0442369	0.299204
ENSMUSG00000033228	ENSMUSG00000033228	72193	Scaf11	SR-related CTD-associated factor 11	0.225027	5.7412	4.28518	0.044276	0.29928
ENSMUSG00000038642	ENSMUSG00000038642	13040	Ctss	cathepsin S	-0.625041	5.58612	4.32521	0.0443954	0.299899
ENSMUSG00000039648	ENSMUSG00000039648	70266	Kyat1	kynurenine aminotransferase 1	0.341384	5.87165	4.27792	0.0444482	0.300067
ENSMUSG00000033554	ENSMUSG00000033554	69740	Dph5	diphthamide biosynthesis 5	0.391384	3.00826	4.27608	0.0444921	0.300175
ENSMUSG00000027881	ENSMUSG00000027881	66921	Prpf38b	PRP38 pre-mRNA processing factor 38 (yeast) domain containing B	0.284678	5.58096	4.2645	0.0447684	0.301674
ENSMUSG00000021037	ENSMUSG00000021037	217737	Ahsa1	AHA1, activator of heat shock protein ATPase 1	0.239317	6.57391	4.26442	0.0447703	0.301674
ENSMUSG00000029610	ENSMUSG00000029610	231872	Aimp2	aminoacyl tRNA synthetase complex-interacting multifunctional protein 2	0.373809	3.54149	4.26313	0.0448013	0.301694
ENSMUSG00000036452	ENSMUSG00000036452	71302	Arhgap26	Rho GTPase activating protein 26	0.4369	3.80253	4.26091	0.0448544	0.301863
ENSMUSG00000033487	ENSMUSG00000033487	319448	Fndc3a	fibronectin type III domain containing 3A	0.309332	4.951	4.25616	0.0449687	0.302443
ENSMUSG00000020962	ENSMUSG00000020962	83602	Gtf2a1	general transcription factor II A, 1	0.318244	4.72106	4.25483	0.0450008	0.30247
ENSMUSG00000024386	ENSMUSG00000024386	19123	Proc	protein C	0.356336	8.23453	4.25545	0.0450417	0.302512
ENSMUSG00000020572	ENSMUSG00000020572	59027	Nampt	nicotinamide phosphoribosyltransferase	-0.390884	5.19067	4.25384	0.045089	0.302512
ENSMUSG00000042729	ENSMUSG00000042729	107071	Wdr74	WD repeat domain 74	0.345019	3.35345	4.25107	0.0450914	0.302512
ENSMUSG00000041685	ENSMUSG00000041685	218503	Fcho2	FCH domain only 2	0.307508	5.78232	4.24611	0.0452113	0.302939
ENSMUSG00000069170	ENSMUSG00000069170	110789	Adgrv1	adhesion G protein-coupled receptor V1	-0.65751	2.91216	4.25319	0.0452115	0.302939
ENSMUSG00000019312	ENSMUSG00000019312	14786	Grb7	growth factor receptor bound protein 7	0.324932	6.5287	4.24314	0.0452833	0.30306
ENSMUSG00000028715	ENSMUSG00000028715	13119	Cyp4a14	cytochrome P450, family 4, subfamily a, polypeptide 14	-0.589122	9.68741	4.28407	0.0452858	0.30306
ENSMUSG00000027981	ENSMUSG00000027981	67225	Rnpc3	RNA-binding region (RNP1, RRM) containing 3	0.312663	3.92921	4.23784	0.0454119	0.303715
ENSMUSG00000038459	ENSMUSG00000038459	70178	Abhd17c	abhydrolase domain containing 17C	0.205418	6.97849	4.23383	0.0455098	0.303896
ENSMUSG00000044231	ENSMUSG00000044231	105193	Nhlrc1	NHL repeat containing 1	-0.954868	0.811136	4.23342	0.0455197	0.303896
ENSMUSG00000018433	ENSMUSG00000018433	68979	Nol11	nucleolar protein 11	0.325038	4.14935	4.23326	0.0455236	0.303896
ENSMUSG00000053414	ENSMUSG00000053414	26559	Hunk	hormonally upregulated Neu-associated kinase	-1.00409	1.34752	4.23018	0.0455989	0.304209
ENSMUSG00000093668	ENSMUSG00000093668	75507	Pou5f2	POU domain class 5, transcription factor 2	-0.828981	1.08086	4.22696	0.0456777	0.304546
ENSMUSG00000020440	ENSMUSG00000020440	11844	Arf5	ADP-ribosylation factor 5	0.533696	6.05362	4.2637	0.0457062	0.304547
ENSMUSG00000045438	ENSMUSG00000045438	68033	Cox19	cytochrome c oxidase assembly protein 19	-0.251776	5.59047	4.22119	0.0458191	0.304962
ENSMUSG00000036402	ENSMUSG00000036402	14701	Gng12	guanine nucleotide binding protein (G protein), gamma 12	-0.245496	5.55137	4.22035	0.0458396	0.304962
ENSMUSG00000090958	ENSMUSG00000090958	434215	Lrrc32	leucine rich repeat containing 32	-0.43864	3.59022	4.2198	0.0458534	0.304962
ENSMUSG00000028089	ENSMUSG00000028089	68058	Chd1l	chromodomain helicase DNA binding protein 1-like	-0.420379	3.08002	4.21799	0.0458979	0.305069
ENSMUSG00000028327	ENSMUSG00000028327	74152	Stra6l	STRA6-like	0.244807	6.53764	4.21092	0.0460721	0.305885
ENSMUSG00000075700	ENSMUSG00000075700	69227	Selenot	selenoprotein T	-0.340388	6.6358	4.20852	0.0461316	0.305885
ENSMUSG00000029068	ENSMUSG00000029068	56036	Ccnl2	cyclin L2	0.21434	5.90929	4.20772	0.0461513	0.305885
ENSMUSG00000028423	ENSMUSG00000028423	74164	Nfx1	nuclear transcription factor, X-box binding 1	0.311127	4.68338	4.20676	0.0461751	0.305885
ENSMUSG00000034006	ENSMUSG00000034006	66943	Pqlc1	PQ loop repeat containing 1	0.23099	6.77488	4.20621	0.0461886	0.305885
ENSMUSG00000020561	ENSMUSG00000020561	28071	Twistnb	twist basic helix-loop-helix transcription factor 1 neighbor	0.241203	5.53784	4.20611	0.0461912	0.305885
ENSMUSG00000061288	ENSMUSG00000061288	330177	Taok3	TAO kinase 3	0.278979	7.33613	4.20274	0.0462747	0.306202
ENSMUSG00000000876	ENSMUSG00000000876	59038	Pxmp4	peroxisomal membrane protein 4	0.236054	6.65779	4.20189	0.0462959	0.306202
ENSMUSG00000030213	ENSMUSG00000030213	54343	Atf7ip	activating transcription factor 7 interacting protein	0.249905	4.8424	4.19846	0.0463813	0.306502
ENSMUSG00000024084	ENSMUSG00000024084	70536	Qpct	glutaminyl-peptide cyclotransferase (glutaminyl cyclase)	0.683414	1.69471	4.19778	0.0463983	0.306502
ENSMUSG00000062515	ENSMUSG00000062515	11770	Fabp4	fatty acid binding protein 4, adipocyte	-0.803631	4.01177	4.24212	0.0464447	0.306604
ENSMUSG00000031441	ENSMUSG00000031441	50770	Atp11a	ATPase, class VI, type 11A	0.538316	2.75281	4.19487	0.0464706	0.306604
ENSMUSG00000024182	ENSMUSG00000024182	12005	Axin1	axin 1	0.335992	3.55142	4.1924	0.0465323	0.306638
ENSMUSG00000063870	ENSMUSG00000063870	107932	Chd4	chromodomain helicase DNA binding protein 4	0.310066	6.69478	4.19238	0.0465329	0.306638
ENSMUSG00000017309	ENSMUSG00000017309	52685	Cd300lg	CD300 molecule like family member G	0.38105	3.78024	4.18756	0.0466535	0.307245
ENSMUSG00000030629	ENSMUSG00000030629	65098	Zfand6	zinc finger, AN1-type domain 6	0.218484	7.10443	4.18323	0.0467622	0.307772
ENSMUSG00000048856	ENSMUSG00000048856	104910	Slc25a47	solute carrier family 25, member 47	-0.312973	8.94112	4.1815	0.0468057	0.30787
ENSMUSG00000047238	ENSMUSG00000047238	75625	Mageh1	melanoma antigen, family H, 1	-0.587604	2.06832	4.17835	0.0468849	0.308126
ENSMUSG00000021134	ENSMUSG00000021134	20384	Srsf5	serine/arginine-rich splicing factor 5	0.248757	6.89509	4.17768	0.0469017	0.308126
ENSMUSG00000022844	ENSMUSG00000022844	72599	Pdia5	protein disulfide isomerase associated 5	0.271535	4.95971	4.17551	0.0469564	0.308296
ENSMUSG00000027884	ENSMUSG00000027884	229725	Clcc1	chloride channel CLIC-like 1	0.194262	5.55811	4.17385	0.0469984	0.308384
ENSMUSG00000022887	ENSMUSG00000022887	17174	Masp1	mannan-binding lectin serine peptidase 1	0.186867	6.40871	4.16712	0.0471687	0.309107
ENSMUSG00000026107	ENSMUSG00000026107	109019	Nabp1	nucleic acid binding protein 1	-0.597546	3.2511	4.17439	0.047187	0.309107
ENSMUSG00000054203	ENSMUSG00000054203	226695	Ifi205	interferon activated gene 205	-0.542818	2.76874	4.16609	0.0471947	0.309107
ENSMUSG00000025003	ENSMUSG00000025003	13098	Cyp2c39	cytochrome P450, family 2, subfamily c, polypeptide 39	-0.676177	1.66557	4.16331	0.0472654	0.309264
ENSMUSG00000047417	ENSMUSG00000047417	66932	Rexo1	REX1, RNA exonuclease 1	0.317128	4.43191	4.16137	0.0473147	0.309264
ENSMUSG00000055737	ENSMUSG00000055737	14600	Ghr	growth hormone receptor	0.26057	8.43434	4.16136	0.047315	0.309264
ENSMUSG00000037369	ENSMUSG00000037369	22289	Kdm6a	lysine (K)-specific demethylase 6A	0.304359	3.49155	4.15769	0.0474084	0.309264
ENSMUSG00000030522	ENSMUSG00000030522	233315	Mtmr10	myotubularin related protein 10	0.31001	4.00964	4.15686	0.0474296	0.309264
ENSMUSG00000035042	ENSMUSG00000035042	20304	Ccl5	chemokine (C-C motif) ligand 5	-1.25928	2.59366	4.20409	0.0474301	0.309264
ENSMUSG00000022995	ENSMUSG00000022995	13800	Enah	ENAH actin regulator	-0.843401	1.41763	4.15651	0.0474385	0.309264
ENSMUSG00000036572	ENSMUSG00000036572	68134	Upf3b	UPF3 regulator of nonsense transcripts homolog B (yeast)	0.286032	5.24471	4.15612	0.0474486	0.309264
ENSMUSG00000032946	ENSMUSG00000032946	19395	Rasgrp2	RAS, guanyl releasing protein 2	-0.342986	4.56936	4.15483	0.0474815	0.309291
ENSMUSG00000028737	ENSMUSG00000028737	212647	Aldh4a1	aldehyde dehydrogenase 4 family, member A1	0.290819	8.11112	4.15328	0.047521	0.309361
ENSMUSG00000081534	ENSMUSG00000081534	67739	Slc48a1	solute carrier family 48 (heme transporter), member 1	-0.290462	6.09848	4.15123	0.0475735	0.309419
ENSMUSG00000042340	ENSMUSG00000042340	13019	Ctf1	cardiotrophin 1	-0.911929	1.93967	4.15228	0.0476574	0.309419
ENSMUSG00000033488	ENSMUSG00000033488	226527	Cryzl2	crystallin zeta like 2	-0.37708	3.98086	4.14627	0.0477006	0.309419
ENSMUSG00000057110	ENSMUSG00000057110	26920	Cntrl	centriolin	0.245128	4.59457	4.14577	0.0477135	0.309419
ENSMUSG00000086859	ENSMUSG00000086859	76972	Snhg20	small nucleolar RNA host gene 20	0.454262	3.47336	4.1457	0.0477153	0.309419
ENSMUSG00000061118	ENSMUSG00000061118	66114	Dnajc30	DnaJ heat shock protein family (Hsp40) member C30	0.417091	4.17756	4.14509	0.047731	0.309419
ENSMUSG00000032481	ENSMUSG00000032481	20588	Smarcc1	SWI/SNF related, matrix associated, actin dependent regulator of chromatin, subfamily c, member 1	0.34294	5.11385	4.14408	0.0477569	0.309419
ENSMUSG00000032513	ENSMUSG00000032513	74498	Gorasp1	golgi reassembly stacking protein 1	0.404611	3.62946	4.14293	0.0477864	0.309419
ENSMUSG00000044811	ENSMUSG00000044811	140497	Cd300c2	CD300C molecule 2	-0.874469	1.48148	4.14284	0.0477888	0.309419
ENSMUSG00000006699	ENSMUSG00000006699	12540	Cdc42	cell division cycle 42	-0.223251	7.4432	4.13876	0.0478939	0.309855
ENSMUSG00000033540	ENSMUSG00000033540	15932	Idua	iduronidase, alpha-L	-0.60906	2.0098	4.13799	0.0479137	0.309855
ENSMUSG00000028979	ENSMUSG00000028979	17175	Masp2	mannan-binding lectin serine peptidase 2	0.263615	7.19685	4.13562	0.0479749	0.310065
ENSMUSG00000020083	ENSMUSG00000020083	69894	Fam241b	family with sequence similarity 241, member B	-0.815	1.37266	4.13361	0.048027	0.310215
ENSMUSG00000049606	ENSMUSG00000049606	52397	Zfp644	zinc finger protein 644	0.22907	5.17008	4.13072	0.0481018	0.310311
ENSMUSG00000028459	ENSMUSG00000028459	12517	Cd72	CD72 antigen	-0.925902	1.57134	4.12999	0.0481205	0.310311
ENSMUSG00000031021	ENSMUSG00000031021	56786	Tmem9b	TMEM9 domain family, member B	-0.43627	4.70913	4.13756	0.0481283	0.310311
ENSMUSG00000011179	ENSMUSG00000011179	18263	Odc1	ornithine decarboxylase, structural 1	-0.277161	5.28159	4.12805	0.0481708	0.310334
ENSMUSG00000028693	ENSMUSG00000028693	50927	Nasp	nuclear autoantigenic sperm protein (histone-binding)	0.328896	4.09307	4.12733	0.0481897	0.310334
ENSMUSG00000033943	ENSMUSG00000033943	29808	Mga	MAX gene associated	0.254778	5.40978	4.12558	0.0482351	0.310441
ENSMUSG00000045284	ENSMUSG00000045284	245404	Dcaf12l1	DDB1 and CUL4 associated factor 12-like 1	-0.440075	2.87372	4.12114	0.0483505	0.310676
ENSMUSG00000027859	ENSMUSG00000027859	18049	Ngf	nerve growth factor	-0.833885	1.36187	4.12065	0.0483634	0.310676
ENSMUSG00000027291	ENSMUSG00000027291	269338	Vps39	VPS39 HOPS complex subunit	0.279206	3.82866	4.12034	0.0483714	0.310676
ENSMUSG00000028527	ENSMUSG00000028527	11639	Ak4	adenylate kinase 4	-0.320034	5.59676	4.1184	0.0484221	0.310676
ENSMUSG00000022025	ENSMUSG00000022025	16840	Cnmd	chondromodulin	1.02883	1.99896	4.136	0.048468	0.310676
ENSMUSG00000034889	ENSMUSG00000034889	70312	Cactin	cactin, spliceosome C complex subunit	0.418149	3.04231	4.11629	0.0484772	0.310676
ENSMUSG00000005481	ENSMUSG00000005481	68278	Ddx39	DEAD (Asp-Glu-Ala-Asp) box polypeptide 39	-0.448835	3.28203	4.116	0.0484847	0.310676
ENSMUSG00000044349	ENSMUSG00000044349	319317	Snhg11	small nucleolar RNA host gene 11	-0.578782	3.57975	4.12784	0.0485025	0.310676
ENSMUSG00000022940	ENSMUSG00000022940	56176	Pigp	phosphatidylinositol glycan anchor biosynthesis, class P	-0.584952	4.29144	4.13985	0.0485772	0.310969
ENSMUSG00000084128	ENSMUSG00000084128	77411	Esrp2	epithelial splicing regulatory protein 2	0.224033	5.24819	4.10831	0.0486861	0.311481
ENSMUSG00000022091	ENSMUSG00000022091	20410	Sorbs3	sorbin and SH3 domain containing 3	0.486712	2.40798	4.1036	0.04881	0.312088
ENSMUSG00000045969	ENSMUSG00000045969	26356	Ing1	inhibitor of growth family, member 1	0.249852	5.35448	4.09862	0.0489413	0.312742
ENSMUSG00000049823	ENSMUSG00000049823	193736	Zbtb12	zinc finger and BTB domain containing 12	0.813664	1.23561	4.09625	0.0490038	0.312908
ENSMUSG00000067787	ENSMUSG00000067787	53619	Blcap	bladder cancer associated protein	0.300108	4.65108	4.0954	0.0490264	0.312908
ENSMUSG00000015846	ENSMUSG00000015846	20181	Rxra	retinoid X receptor alpha	0.272201	7.418	4.09274	0.0490966	0.312908
ENSMUSG00000044224	ENSMUSG00000044224	78244	Dnajc21	DnaJ heat shock protein family (Hsp40) member C21	0.325804	4.92812	4.09217	0.0491119	0.312908
ENSMUSG00000044986	ENSMUSG00000044986	22117	Tst	thiosulfate sulfurtransferase, mitochondrial	0.346178	5.24933	4.09214	0.0491127	0.312908
ENSMUSG00000048379	ENSMUSG00000048379	67296	Socs4	suppressor of cytokine signaling 4	0.36129	3.59857	4.09087	0.0491463	0.312937
ENSMUSG00000055491	ENSMUSG00000055491	226169	Pprc1	peroxisome proliferative activated receptor, gamma, coactivator-related 1	-0.602532	1.54036	4.08771	0.0492303	0.313286
ENSMUSG00000026222	ENSMUSG00000026222	20684	Sp100	nuclear antigen Sp100	-0.424277	3.45317	4.08466	0.0493113	0.313617
ENSMUSG00000060950	ENSMUSG00000060950	328162	Trmt61a	tRNA methyltransferase 61A	-0.544413	2.2651	4.08199	0.0493825	0.313622
ENSMUSG00000028716	ENSMUSG00000028716	67182	Pdzk1ip1	PDZK1 interacting protein 1	-1.01408	2.9146	4.12011	0.0493827	0.313622
ENSMUSG00000054716	ENSMUSG00000054716	244216	Zfp771	zinc finger protein 771	0.299618	4.26706	4.08135	0.0493996	0.313622
ENSMUSG00000028560	ENSMUSG00000028560	230484	Usp1	ubiquitin specific peptidase 1	0.264398	4.6519	4.07889	0.0494651	0.313853
ENSMUSG00000014195	ENSMUSG00000014195	56354	Dnajc7	DnaJ heat shock protein family (Hsp40) member C7	0.380981	4.41547	4.07532	0.0495606	0.314273
ENSMUSG00000024937	ENSMUSG00000024937	114601	Ehbp1l1	EH domain binding protein 1-like 1	-0.555696	2.65469	4.07234	0.0496405	0.314594
ENSMUSG00000020847	ENSMUSG00000020847	380714	Rph3al	rabphilin 3A-like (without C2 domains)	-0.868889	1.15666	4.07051	0.0496895	0.31472
ENSMUSG00000006678	ENSMUSG00000006678	18968	Pola1	polymerase (DNA directed), alpha 1	0.525281	2.51293	4.06807	0.049755	0.314811
ENSMUSG00000025949	ENSMUSG00000025949	18711	Pikfyve	phosphoinositide kinase, FYVE type zinc finger containing	0.318563	3.91044	4.06725	0.0497771	0.314811
ENSMUSG00000053436	ENSMUSG00000053436	26416	Mapk14	mitogen-activated protein kinase 14	0.255669	5.33906	4.06671	0.0497916	0.314811
ENSMUSG00000003559	ENSMUSG00000003559	57344	As3mt	arsenic (+3 oxidation state) methyltransferase	-0.456714	4.55222	4.07449	0.0498498	0.314813
ENSMUSG00000030056	ENSMUSG00000030056	57905	Isy1	ISY1 splicing factor homolog	-0.305072	3.57822	4.06374	0.0498716	0.314813
ENSMUSG00000028898	ENSMUSG00000028898	71787	Trnau1ap	tRNA selenocysteine 1 associated protein 1	-0.357948	3.59363	4.06344	0.0498797	0.314813
ENSMUSG00000001419	ENSMUSG00000001419	17261	Mef2d	myocyte enhancer factor 2D	-0.358624	4.32119	4.06012	0.0499692	0.315079
ENSMUSG00000003948	ENSMUSG00000003948	67468	Mmd	monocyte to macrophage differentiation-associated	0.230313	7.33777	4.05971	0.0499805	0.315079
ENSMUSG00000038301	ENSMUSG00000038301	71982	Snx10	sorting nexin 10	-0.325152	4.46163	4.05748	0.0500407	0.315274
ENSMUSG00000062691	ENSMUSG00000062691	68554	Cebpzos	CCAAT/enhancer binding protein (C/EBP), zeta, opposite strand	-0.461347	3.93422	4.05251	0.0502221	0.316192
ENSMUSG00000033159	ENSMUSG00000033159	69171	Cnppd1	cyclin Pas1/PHO80 domain containing 1	0.219548	6.60738	4.04877	0.0502768	0.316192
ENSMUSG00000115338	ENSMUSG00000115338	18950	Pnp	purine-nucleoside phosphorylase	0.394038	5.98918	4.05926	0.0502984	0.316192
ENSMUSG00000002233	ENSMUSG00000002233	11853	Rhoc	ras homolog family member C	-0.564668	4.23901	4.07098	0.0503039	0.316192
ENSMUSG00000046818	ENSMUSG00000046818	73284	Ddit4l	DNA-damage-inducible transcript 4-like	-1.03926	1.94906	4.0585	0.0504308	0.316805
ENSMUSG00000040462	ENSMUSG00000040462	216440	Os9	amplified in osteosarcoma	0.263746	6.89465	4.0294	0.0508067	0.31898
ENSMUSG00000025283	ENSMUSG00000025283	20229	Sat1	spermidine/spermine N1-acetyl transferase 1	-0.550884	5.86866	4.06367	0.050883	0.319227
ENSMUSG00000031709	ENSMUSG00000031709	71310	Tbc1d9	TBC1 domain family, member 9	-1.01489	0.776248	4.02581	0.0509055	0.319227
ENSMUSG00000031328	ENSMUSG00000031328	192176	Flna	filamin, alpha	-0.517973	4.25742	4.03923	0.050983	0.319513
ENSMUSG00000024507	ENSMUSG00000024507	15488	Hsd17b4	hydroxysteroid (17-beta) dehydrogenase 4	-0.355513	7.87858	4.02607	0.0510112	0.319513
ENSMUSG00000054191	ENSMUSG00000054191	16596	Klf1	Kruppel-like factor 1 (erythroid)	0.747338	1.80798	4.02093	0.0510402	0.319513
ENSMUSG00000030779	ENSMUSG00000030779	19647	Rbbp6	retinoblastoma binding protein 6, ubiquitin ligase	0.267395	6.21182	4.01562	0.0511872	0.320026
ENSMUSG00000023791	ENSMUSG00000023791	72084	Pigx	phosphatidylinositol glycan anchor biosynthesis, class X	0.372736	4.08226	4.01514	0.0512006	0.320026
ENSMUSG00000039671	ENSMUSG00000039671	228880	Zmynd8	zinc finger, MYND-type containing 8	0.226533	5.76687	4.01475	0.0512113	0.320026
ENSMUSG00000032120	ENSMUSG00000032120	71764	C2cd2l	C2 calcium-dependent domain containing 2-like	-0.235354	4.83346	4.01166	0.0512973	0.320313
ENSMUSG00000027699	ENSMUSG00000027699	13605	Ect2	ect2 oncogene	-1.35014	0.798972	4.01526	0.0513336	0.320313
ENSMUSG00000038535	ENSMUSG00000038535	235469	Zfp280d	zinc finger protein 280D	0.320318	3.83388	4.0093	0.0513629	0.320313
ENSMUSG00000032606	ENSMUSG00000032606	66257	Nicn1	nicolin 1	0.289098	4.25986	4.00882	0.0513762	0.320313
ENSMUSG00000020644	ENSMUSG00000020644	15902	Id2	inhibitor of DNA binding 2	0.284001	9.22918	4.00373	0.051518	0.320889
ENSMUSG00000049502	ENSMUSG00000049502	209200	Dtx3l	deltex 3-like, E3 ubiquitin ligase	-0.245951	5.51652	4.00337	0.0515283	0.320889
ENSMUSG00000006014	ENSMUSG00000006014	96875	Prg4	proteoglycan 4 (megakaryocyte stimulating factor, articular superficial zone protein)	-0.31051	4.77556	4.00191	0.0515689	0.320956
ENSMUSG00000017802	ENSMUSG00000017802	67998	Retreg3	reticulophagy regulator family member 3	0.501125	2.91451	4.00061	0.0516053	0.320969
ENSMUSG00000060703	ENSMUSG00000060703	66205	Cd302	CD302 antigen	0.318142	6.24692	3.99971	0.0516306	0.320969
ENSMUSG00000025613	ENSMUSG00000025613	12469	Cct8	chaperonin containing Tcp1, subunit 8 (theta)	0.173767	6.73406	3.99704	0.0517053	0.321106
ENSMUSG00000025521	ENSMUSG00000025521	73067	Tmem192	transmembrane protein 192	-0.421435	3.25838	3.99679	0.0517123	0.321106
ENSMUSG00000024065	ENSMUSG00000024065	57440	Ehd3	EH-domain containing 3	0.289151	6.67024	3.99404	0.0517894	0.321399
ENSMUSG00000066233	ENSMUSG00000066233	66079	Tmem42	transmembrane protein 42	0.476937	2.56913	3.99088	0.0518785	0.321766
ENSMUSG00000029269	ENSMUSG00000029269	56362	Sult1b1	sulfotransferase family 1B, member 1	0.311687	5.58422	3.98928	0.0519235	0.32186
ENSMUSG00000052748	ENSMUSG00000052748	66875	Swt1	SWT1 RNA endoribonuclease homolog (S. cerevisiae)	0.219686	4.79168	3.98645	0.0520033	0.321896
ENSMUSG00000022799	ENSMUSG00000022799	12549	Arhgap31	Rho GTPase activating protein 31	-0.423266	2.78719	3.98592	0.0520183	0.321896
ENSMUSG00000037234	ENSMUSG00000037234	320191	Hook3	hook microtubule tethering protein 3	0.22764	6.43851	3.9847	0.0520526	0.321896
ENSMUSG00000036371	ENSMUSG00000036371	66870	Serbp1	serpine1 mRNA binding protein 1	0.194328	8.30702	3.98284	0.0521051	0.321896
ENSMUSG00000046111	ENSMUSG00000046111	319675	Cep295	centrosomal protein 295	0.480494	2.6392	3.9824	0.0521176	0.321896
ENSMUSG00000001123	ENSMUSG00000001123	16859	Lgals9	lectin, galactose binding, soluble 9	0.244861	8.14	3.98222	0.0521227	0.321896
ENSMUSG00000011884	ENSMUSG00000011884	56356	Gltp	glycolipid transfer protein	-0.571429	2.71386	3.98166	0.0521387	0.321896
ENSMUSG00000041570	ENSMUSG00000041570	67886	Camsap2	calmodulin regulated spectrin-associated protein family, member 2	0.318944	3.73916	3.97802	0.0522416	0.322346
ENSMUSG00000019802	ENSMUSG00000019802	140740	Sec63	SEC63-like (S. cerevisiae)	0.190701	6.7365	3.97512	0.0523239	0.322669
ENSMUSG00000000282	ENSMUSG00000000282	17428	Mnt	max binding protein	-0.396468	2.95313	3.96105	0.0527252	0.324849
ENSMUSG00000027800	ENSMUSG00000027800	17112	Tm4sf1	transmembrane 4 superfamily member 1	-0.502631	3.86155	3.9678	0.0527377	0.324849
ENSMUSG00000039531	ENSMUSG00000039531	72580	Zup1	zinc finger containing ubiquitin peptidase 1	0.397118	3.42056	3.95798	0.0528133	0.325128
ENSMUSG00000027438	ENSMUSG00000027438	17957	Napb	N-ethylmaleimide sensitive fusion protein attachment protein beta	0.491119	2.7582	3.95671	0.0528499	0.325167
ENSMUSG00000031697	ENSMUSG00000031697	56452	Orc6	origin recognition complex, subunit 6	0.629458	1.62371	3.95303	0.0529556	0.325265
ENSMUSG00000008398	ENSMUSG00000008398	13713	Elk3	ELK3, member of ETS oncogene family	-0.349544	2.96582	3.94939	0.0530606	0.325265
ENSMUSG00000003279	ENSMUSG00000003279	224997	Dlgap1	DLG associated protein 1	0.866184	1.78516	3.94826	0.0530932	0.325265
ENSMUSG00000026281	ENSMUSG00000026281	21915	Dtymk	deoxythymidylate kinase	-0.439893	3.3414	3.94716	0.0531249	0.325265
ENSMUSG00000021589	ENSMUSG00000021589	73296	Rhobtb3	Rho-related BTB domain containing 3	0.579733	1.73446	3.94697	0.0531305	0.325265
ENSMUSG00000023044	ENSMUSG00000023044	246277	Csad	cysteine sulfinic acid decarboxylase	-0.728674	7.7413	3.9949	0.0531769	0.325265
ENSMUSG00000059273	ENSMUSG00000059273	330474	Zc3h4	zinc finger CCCH-type containing 4	0.267888	4.13223	3.94503	0.0531865	0.325265
ENSMUSG00000038055	ENSMUSG00000038055	58239	Dexi	dexamethasone-induced transcript	0.27909	4.99414	3.94465	0.0531974	0.325265
ENSMUSG00000038462	ENSMUSG00000038462	66694	Uqcrfs1	ubiquinol-cytochrome c reductase, Rieske iron-sulfur polypeptide 1	-0.428783	7.42274	3.96533	0.0531984	0.325265
ENSMUSG00000015085	ENSMUSG00000015085	12496	Entpd2	ectonucleoside triphosphate diphosphohydrolase 2	-0.57054	1.89277	3.94412	0.0532128	0.325265
ENSMUSG00000026072	ENSMUSG00000026072	16177	Il1r1	interleukin 1 receptor, type I	0.5259	3.25637	3.94274	0.0532526	0.325265
ENSMUSG00000019478	ENSMUSG00000019478	19341	Rab4a	RAB4A, member RAS oncogene family	-0.405913	3.81724	3.94266	0.0532551	0.325265
ENSMUSG00000037364	ENSMUSG00000037364	83701	Srrt	serrate RNA effector molecule homolog (Arabidopsis)	0.312113	5.07849	3.94092	0.0533054	0.325265
ENSMUSG00000020902	ENSMUSG00000020902	18208	Ntn1	netrin 1	-0.721417	1.3085	3.94063	0.053314	0.325265
ENSMUSG00000043140	ENSMUSG00000043140	66690	Tmem186	transmembrane protein 186	0.401603	2.87861	3.94045	0.0533192	0.325265
ENSMUSG00000021418	ENSMUSG00000021418	208366	Rpp40	ribonuclease P 40 subunit	0.437731	2.33308	3.93846	0.0533768	0.325329
ENSMUSG00000037415	ENSMUSG00000037415	74334	Ranbp10	RAN binding protein 10	0.250473	5.41312	3.938	0.0533901	0.325329
ENSMUSG00000025899	ENSMUSG00000025899	67667	Alkbh8	alkB homolog 8, tRNA methyltransferase	0.361037	3.62674	3.93464	0.0534879	0.32574
ENSMUSG00000040213	ENSMUSG00000040213	229905	Kyat3	kynurenine aminotransferase 3	0.320188	6.75874	3.93207	0.0535628	0.326012
ENSMUSG00000044788	ENSMUSG00000044788	328035	Fads6	fatty acid desaturase domain family, member 6	0.262458	6.37667	3.92412	0.0537951	0.32709
ENSMUSG00000040850	ENSMUSG00000040850	103554	Psme4	proteasome (prosome, macropain) activator subunit 4	0.196086	6.14131	3.9226	0.0538396	0.32709
ENSMUSG00000030714	ENSMUSG00000030714	75565	Sgf29	SAGA complex associated factor 29	0.359558	3.39687	3.92228	0.0538489	0.32709
ENSMUSG00000019790	ENSMUSG00000019790	78808	Stxbp5	syntaxin binding protein 5 (tomosyn)	-0.327084	3.09767	3.92185	0.0538615	0.32709
ENSMUSG00000033099	ENSMUSG00000033099	97961	Nol12	nucleolar protein 12	0.388447	3.17586	3.9197	0.0539245	0.327288
ENSMUSG00000009894	ENSMUSG00000009894	67826	Snap47	synaptosomal-associated protein, 47	0.29622	6.06746	3.91746	0.0539902	0.327502
ENSMUSG00000031207	ENSMUSG00000031207	17698	Msn	moesin	-0.346243	4.87599	3.91407	0.0540902	0.327924
ENSMUSG00000021451	ENSMUSG00000021451	20354	Sema4d	sema domain, immunoglobulin domain (Ig), transmembrane domain (TM) and short cytoplasmic domain, (semaphorin) 4D	-1.40739	0.831761	3.91852	0.0541338	0.328003
ENSMUSG00000063919	ENSMUSG00000063919	68955	Srrm4	serine/arginine repetitive matrix 4	0.786759	0.959209	3.91101	0.0541804	0.328101
ENSMUSG00000029484	ENSMUSG00000029484	11745	Anxa3	annexin A3	-0.636855	2.58948	3.90649	0.0543139	0.328724
ENSMUSG00000022419	ENSMUSG00000022419	97998	Deptor	DEP domain containing MTOR-interacting protein	0.252373	8.74277	3.90276	0.0544246	0.329209
ENSMUSG00000056394	ENSMUSG00000056394	16881	Lig1	ligase I, DNA, ATP-dependent	-0.468538	3.43733	3.89898	0.0545366	0.32952
ENSMUSG00000018585	ENSMUSG00000018585	11927	Atox1	antioxidant 1 copper chaperone	-0.307247	7.24918	3.89755	0.0545793	0.32952
ENSMUSG00000010609	ENSMUSG00000010609	19165	Psen2	presenilin 2	0.228146	8.69877	3.8959	0.0546284	0.32952
ENSMUSG00000032320	ENSMUSG00000032320	26611	Rcn2	reticulocalbin 2	-0.658988	1.88769	3.89589	0.0546288	0.32952
ENSMUSG00000004665	ENSMUSG00000004665	12798	Cnn2	calponin 2	-0.546923	2.27052	3.89588	0.0546291	0.32952
ENSMUSG00000030834	ENSMUSG00000030834	27421	Abcc6	ATP-binding cassette, sub-family C (CFTR/MRP), member 6	0.249372	5.19832	3.89311	0.0547115	0.329831
ENSMUSG00000022261	ENSMUSG00000022261	15529	Sdc2	syndecan 2	0.322422	7.04594	3.89156	0.0547577	0.329831
ENSMUSG00000029102	ENSMUSG00000029102	54426	Hgfac	hepatocyte growth factor activator	0.315542	7.83817	3.89016	0.0547997	0.329831
ENSMUSG00000022500	ENSMUSG00000022500	56722	Litaf	LPS-induced TN factor	-0.203702	6.24365	3.89004	0.0548033	0.329831
ENSMUSG00000050890	ENSMUSG00000050890	230809	Pdik1l	PDLIM1 interacting kinase 1 like	0.303986	3.95611	3.88603	0.0549231	0.330367
ENSMUSG00000055254	ENSMUSG00000055254	18212	Ntrk2	neurotrophic tyrosine kinase, receptor, type 2	-1.55169	2.32162	3.92692	0.0551133	0.331327
ENSMUSG00000060657	ENSMUSG00000060657	223989	Marf1	meiosis regulator and mRNA stability 1	0.482425	5.46314	3.90119	0.0551946	0.33163
ENSMUSG00000003541	ENSMUSG00000003541	15937	Ier3	immediate early response 3	-0.824661	1.53331	3.87485	0.0552593	0.331771
ENSMUSG00000061740	ENSMUSG00000061740	56448	Cyp2d22	cytochrome P450, family 2, subfamily d, polypeptide 22	0.2355	7.27489	3.87327	0.0553069	0.331771
ENSMUSG00000028923	ENSMUSG00000028923	66147	Necap2	NECAP endocytosis associated 2	-0.395623	2.91129	3.87281	0.0553208	0.331771
ENSMUSG00000050022	ENSMUSG00000050022	231842	Amz1	archaelysin family metallopeptidase 1	-1.22043	0.978443	3.87309	0.0553414	0.331771
ENSMUSG00000026890	ENSMUSG00000026890	16874	Lhx6	LIM homeobox protein 6	-0.730453	1.84791	3.8632	0.0556118	0.332897
ENSMUSG00000022817	ENSMUSG00000022817	16419	Itgb5	integrin beta 5	-0.294138	5.26058	3.86275	0.0556256	0.332897
ENSMUSG00000020827	ENSMUSG00000020827	50932	Mink1	misshapen-like kinase 1 (zebrafish)	0.437159	3.98743	3.86222	0.0556441	0.332897
ENSMUSG00000038393	ENSMUSG00000038393	56338	Txnip	thioredoxin interacting protein	-0.662378	6.64614	3.90661	0.0556529	0.332897
ENSMUSG00000038975	ENSMUSG00000038975	19352	Rabggtb	Rab geranylgeranyl transferase, b subunit	0.261584	5.59974	3.85969	0.0557187	0.332931
ENSMUSG00000019929	ENSMUSG00000019929	13179	Dcn	decorin	-0.302804	8.31386	3.85819	0.0557641	0.332931
ENSMUSG00000029925	ENSMUSG00000029925	21391	Tbxas1	thromboxane A synthase 1, platelet	-0.902162	1.39306	3.85792	0.0557723	0.332931
ENSMUSG00000048612	ENSMUSG00000048612	226101	Myof	myoferlin	-0.672948	2.32873	3.85759	0.0557824	0.332931
ENSMUSG00000026042	ENSMUSG00000026042	12832	Col5a2	collagen, type V, alpha 2	-1.23974	2.08281	3.88901	0.0558404	0.333092
ENSMUSG00000026981	ENSMUSG00000026981	16181	Il1rn	interleukin 1 receptor antagonist	-0.605121	2.81498	3.85245	0.0559395	0.333198
ENSMUSG00000048271	ENSMUSG00000048271	381626	Rbm33	RNA binding motif protein 33	0.315541	4.36771	3.85227	0.0559449	0.333198
ENSMUSG00000023367	ENSMUSG00000023367	66058	Tmem176a	transmembrane protein 176A	-0.391201	7.54446	3.86476	0.0559567	0.333198
ENSMUSG00000027422	ENSMUSG00000027422	81910	Rrbp1	ribosome binding protein 1	0.234964	8.41298	3.85106	0.0559819	0.333198
ENSMUSG00000070003	ENSMUSG00000070003	76900	Ssbp4	single stranded DNA binding protein 4	-0.621176	2.02576	3.84977	0.0560215	0.333202
ENSMUSG00000046598	ENSMUSG00000046598	71911	Bdh1	3-hydroxybutyrate dehydrogenase, type 1	-0.204333	8.30521	3.84901	0.0560446	0.333202
ENSMUSG00000047371	ENSMUSG00000047371	233890	Zfp768	zinc finger protein 768	0.315698	4.46555	3.84757	0.0560887	0.33328
ENSMUSG00000028013	ENSMUSG00000028013	74776	Ppa2	pyrophosphatase (inorganic) 2	-0.212944	5.54405	3.84576	0.0561443	0.333427
ENSMUSG00000028494	ENSMUSG00000028494	11520	Plin2	perilipin 2	-0.297035	9.85263	3.84246	0.0562456	0.333844
ENSMUSG00000072770	ENSMUSG00000072770	54137	Acrbp	proacrosin binding protein	0.499975	2.67492	3.84093	0.0562929	0.33394
ENSMUSG00000029169	ENSMUSG00000029169	13204	Dhx15	DEAH (Asp-Glu-Ala-His) box polypeptide 15	0.212681	5.48548	3.83487	0.0564795	0.334863
ENSMUSG00000006494	ENSMUSG00000006494	228026	Pdk1	pyruvate dehydrogenase kinase, isoenzyme 1	-0.35462	5.6785	3.83392	0.0565805	0.335248
ENSMUSG00000030846	ENSMUSG00000030846	21843	Tial1	Tia1 cytotoxic granule-associated RNA binding protein-like 1	0.210479	5.23183	3.83037	0.0566189	0.335248
ENSMUSG00000039536	ENSMUSG00000039536	20853	Stau1	staufen double-stranded RNA binding protein 1	0.232553	5.38716	3.82975	0.0566379	0.335248
ENSMUSG00000024030	ENSMUSG00000024030	11307	Abcg1	ATP binding cassette subfamily G member 1	-0.568443	2.66743	3.82648	0.0567393	0.335663
ENSMUSG00000029369	ENSMUSG00000029369	280662	Afm	afamin	0.249646	7.32298	3.82538	0.0567735	0.335681
ENSMUSG00000019810	ENSMUSG00000019810	66848	Fuca2	fucosidase, alpha-L- 2, plasma	-0.36355	2.96805	3.82228	0.0568701	0.336019
ENSMUSG00000036568	ENSMUSG00000036568	210982	Bicral	BRD4 interacting chromatin remodeling complex associated protein like	0.270859	3.68418	3.82154	0.0568931	0.336019
ENSMUSG00000019817	ENSMUSG00000019817	22634	Plagl1	pleiomorphic adenoma gene-like 1	-0.967377	1.50608	3.81932	0.0569624	0.336244
ENSMUSG00000078234	ENSMUSG00000078234	242721	Klhdc7a	kelch domain containing 7A	0.431549	3.75604	3.81302	0.0571591	0.33722
ENSMUSG00000018654	ENSMUSG00000018654	22778	Ikzf1	IKAROS family zinc finger 1	-0.645211	1.93917	3.81078	0.0572292	0.337448
ENSMUSG00000038507	ENSMUSG00000038507	243771	Parp12	poly (ADP-ribose) polymerase family, member 12	-0.304239	4.58789	3.80843	0.0573028	0.337568
ENSMUSG00000043760	ENSMUSG00000043760	241035	Pkhd1	polycystic kidney and hepatic disease 1	0.584373	2.44004	3.80814	0.0573121	0.337568
ENSMUSG00000041757	ENSMUSG00000041757	240753	Plekha6	pleckstrin homology domain containing, family A member 6	0.312465	5.0298	3.8055	0.0573948	0.337736
ENSMUSG00000031403	ENSMUSG00000031403	245474	Dkc1	dyskeratosis congenita 1, dyskerin	0.344487	5.00521	3.80523	0.0574036	0.337736
ENSMUSG00000022360	ENSMUSG00000022360	70472	Atad2	ATPase family, AAA domain containing 2	-0.644413	2.03323	3.80315	0.0574689	0.337936
ENSMUSG00000001175	ENSMUSG00000001175	12313	Calm1	calmodulin 1	-0.181217	8.59854	3.7978	0.0576376	0.33871
ENSMUSG00000025747	ENSMUSG00000025747	22171	Tyms	thymidylate synthase	-0.388035	2.73745	3.79698	0.0576635	0.33871
ENSMUSG00000044627	ENSMUSG00000044627	72931	Swi5	SWI5 recombination repair homolog (yeast)	0.319548	6.06417	3.79317	0.0577841	0.338922
ENSMUSG00000028636	ENSMUSG00000028636	106564	Ppcs	phosphopantothenoylcysteine synthetase	-0.229201	5.57836	3.79195	0.0578227	0.338922
ENSMUSG00000016534	ENSMUSG00000016534	16784	Lamp2	lysosomal-associated membrane protein 2	0.188808	8.58643	3.79062	0.0578648	0.338922
ENSMUSG00000042700	ENSMUSG00000042700	217692	Sipa1l1	signal-induced proliferation-associated 1 like 1	0.279131	4.3549	3.79004	0.0578833	0.338922
ENSMUSG00000052681	ENSMUSG00000052681	215449	Rap1b	RAS related protein 1b	-0.232302	5.6379	3.78926	0.057908	0.338922
ENSMUSG00000056737	ENSMUSG00000056737	12332	Capg	capping protein (actin filament), gelsolin-like	-1.12342	0.999047	3.78926	0.0579103	0.338922
ENSMUSG00000040721	ENSMUSG00000040721	239102	Zfhx2	zinc finger homeobox 2	0.36003	3.68904	3.78888	0.0579201	0.338922
ENSMUSG00000098112	ENSMUSG00000098112	668218	Bin2	bridging integrator 2	-0.745822	1.59591	3.78467	0.0580541	0.339522
ENSMUSG00000055912	ENSMUSG00000055912	232086	Tmem150a	transmembrane protein 150A	0.250136	6.86784	3.78333	0.0580966	0.339586
ENSMUSG00000038845	ENSMUSG00000038845	18673	Phb	prohibitin	-0.203271	6.48371	3.77984	0.0582081	0.340053
ENSMUSG00000051344	ENSMUSG00000051344	241075	Plekhm3	pleckstrin homology domain containing, family M, member 3	-0.746965	1.78582	3.77865	0.0582459	0.340089
ENSMUSG00000024997	ENSMUSG00000024997	11757	Prdx3	peroxiredoxin 3	-0.400313	5.51136	3.78373	0.0584165	0.340768
ENSMUSG00000040272	ENSMUSG00000040272	329470	Accs	1-aminocyclopropane-1-carboxylate synthase (non-functional)	-0.580324	1.94219	3.77301	0.0584267	0.340768
ENSMUSG00000064341	ENSMUSG00000064341	17716	ND1	NADH dehydrogenase subunit 1	-0.229338	13.2792	3.77106	0.0584891	0.340768
ENSMUSG00000048495	ENSMUSG00000048495	68736	Tyw5	tRNA-yW synthesizing protein 5	0.476571	3.43722	3.77079	0.0584978	0.340768
ENSMUSG00000029073	ENSMUSG00000029073	79554	Cptp	ceramide-1-phosphate transfer protein	-0.368131	3.28665	3.7669	0.0586229	0.340768
ENSMUSG00000041298	ENSMUSG00000041298	231912	Katnal1	katanin p60 subunit A-like 1	-0.471679	2.60195	3.76652	0.0586353	0.340768
ENSMUSG00000033423	ENSMUSG00000033423	140546	Eri3	exoribonuclease 3	0.493181	3.03062	3.76639	0.0586392	0.340768
ENSMUSG00000019080	ENSMUSG00000019080	69572	Mfsd3	major facilitator superfamily domain containing 3	0.444569	3.03279	3.76557	0.0586658	0.340768
ENSMUSG00000020078	ENSMUSG00000020078	30930	Vps26a	VPS26 retromer complex component A	-0.375412	4.6625	3.76512	0.0586802	0.340768
ENSMUSG00000000489	ENSMUSG00000000489	18591	Pdgfb	platelet derived growth factor, B polypeptide	-0.891563	1.33088	3.76496	0.0586853	0.340768
ENSMUSG00000049760	ENSMUSG00000049760	224904	Micos13	mitochondrial contact site and cristae organizing system subunit 13	0.269345	6.22988	3.76316	0.0587434	0.340768
ENSMUSG00000039414	ENSMUSG00000039414	320473	Heatr5b	HEAT repeat containing 5B	-0.520706	3.78635	3.7728	0.0587662	0.340768
ENSMUSG00000028820	ENSMUSG00000028820	71514	Sfpq	splicing factor proline/glutamine rich (polypyrimidine tract binding protein associated)	0.265233	5.56535	3.76222	0.0587738	0.340768
ENSMUSG00000072676	ENSMUSG00000072676	66039	Tmem254a	transmembrane protein 254a	0.273086	7.33382	3.76104	0.0588118	0.340777
ENSMUSG00000052155	ENSMUSG00000052155	11480	Acvr2a	activin receptor IIA	0.366726	2.87971	3.75838	0.0588979	0.340777
ENSMUSG00000046434	ENSMUSG00000046434	15382	Hnrnpa1	heterogeneous nuclear ribonucleoprotein A1	-0.326017	5.00632	3.7577	0.0589197	0.340777
ENSMUSG00000033016	ENSMUSG00000033016	18018	Nfatc1	nuclear factor of activated T cells, cytoplasmic, calcineurin dependent 1	0.382382	3.35947	3.7574	0.0589295	0.340777
ENSMUSG00000028044	ENSMUSG00000028044	54124	Cks1b	CDC28 protein kinase 1b	-0.540432	2.79807	3.75727	0.0589338	0.340777
ENSMUSG00000028634	ENSMUSG00000028634	16656	Hivep3	human immunodeficiency virus type I enhancer binding protein 3	-0.651042	2.16971	3.75578	0.058982	0.340872
ENSMUSG00000031931	ENSMUSG00000031931	56503	Ankrd49	ankyrin repeat domain 49	0.337683	4.20439	3.75479	0.059014	0.340872
ENSMUSG00000018593	ENSMUSG00000018593	20692	Sparc	secreted acidic cysteine rich glycoprotein	-0.513402	6.7587	3.78654	0.0590452	0.340872
ENSMUSG00000056763	ENSMUSG00000056763	211660	Cspp1	centrosome and spindle pole associated protein 1	0.257307	4.69988	3.75159	0.0591181	0.340957
ENSMUSG00000041891	ENSMUSG00000041891	70361	Lman1	lectin, mannose-binding, 1	0.190627	8.27386	3.75142	0.0591234	0.340957
ENSMUSG00000004383	ENSMUSG00000004383	16795	Large1	LARGE xylosyl- and glucuronyltransferase 1	-0.476677	2.59099	3.74899	0.0592024	0.341219
ENSMUSG00000046329	ENSMUSG00000046329	66972	Slc25a23	solute carrier family 25 (mitochondrial carrier; phosphate carrier), member 23	0.184143	6.97069	3.74716	0.0592619	0.341219
ENSMUSG00000001143	ENSMUSG00000001143	214895	Lman2l	lectin, mannose-binding 2-like	0.364888	3.22136	3.74499	0.0593326	0.341219
ENSMUSG00000032402	ENSMUSG00000032402	17127	Smad3	SMAD family member 3	0.372488	3.5873	3.74457	0.0593464	0.341219
ENSMUSG00000027398	ENSMUSG00000027398	16176	Il1b	interleukin 1 beta	-0.788365	1.9631	3.74422	0.0593579	0.341219
ENSMUSG00000002625	ENSMUSG00000002625	54194	Akap8l	A kinase (PRKA) anchor protein 8-like	0.453901	4.52337	3.75556	0.0593589	0.341219
ENSMUSG00000026687	ENSMUSG00000026687	56752	Aldh9a1	aldehyde dehydrogenase 9, subfamily A1	0.200083	7.01239	3.74195	0.0594321	0.341457
ENSMUSG00000027091	ENSMUSG00000027091	69082	Zc3h15	zinc finger CCCH-type containing 15	0.21686	6.43607	3.74021	0.0594889	0.341571
ENSMUSG00000024725	ENSMUSG00000024725	20409	Ostf1	osteoclast stimulating factor 1	-0.300635	4.86861	3.73851	0.0595444	0.341571
ENSMUSG00000038244	ENSMUSG00000038244	320878	Mical2	microtubule associated monooxygenase, calponin and LIM domain containing 2	0.402094	3.14986	3.73814	0.0595567	0.341571
ENSMUSG00000027801	ENSMUSG00000027801	229302	Tm4sf4	transmembrane 4 superfamily member 4	-0.538885	5.92433	3.77085	0.0595789	0.341571
ENSMUSG00000013822	ENSMUSG00000013822	66126	Elof1	ELF1 homolog, elongation factor 1	0.314796	4.88084	3.73338	0.0597128	0.341924
ENSMUSG00000021760	ENSMUSG00000021760	69590	Gpx8	glutathione peroxidase 8 (putative)	-1.13927	0.695792	3.73292	0.059728	0.341924
ENSMUSG00000045763	ENSMUSG00000045763	70350	Basp1	brain abundant, membrane attached signal protein 1	-0.603241	3.1064	3.73975	0.0597358	0.341924
ENSMUSG00000004127	ENSMUSG00000004127	108943	Trmt10a	tRNA methyltransferase 10A	0.337136	3.14503	3.73126	0.0597823	0.342008
ENSMUSG00000021867	ENSMUSG00000021867	100039257	Tmem254b	transmembrane protein 254b	0.275634	7.30685	3.73009	0.0598208	0.342046
ENSMUSG00000026669	ENSMUSG00000026669	70024	Mcm10	minichromosome maintenance 10 replication initiation factor	0.402083	6.30498	3.74166	0.0599426	0.342486
ENSMUSG00000033166	ENSMUSG00000033166	72662	Dis3	DIS3 homolog, exosome endoribonuclease and 3'-5' exoribonuclease	0.431259	2.63254	3.72583	0.0599613	0.342486
ENSMUSG00000024797	ENSMUSG00000024797	68505	Vps51	VPS51 GARP complex subunit	-0.636473	1.46388	3.7225	0.0600712	0.342931
ENSMUSG00000038368	ENSMUSG00000038368	230393	Focad	focadhesin	-0.434129	2.71735	3.72046	0.0601389	0.342946
ENSMUSG00000024587	ENSMUSG00000024587	70223	Nars	asparaginyl-tRNA synthetase	0.231027	6.19405	3.71822	0.0602128	0.342946
ENSMUSG00000030236	ENSMUSG00000030236	28253	Slco1b2	solute carrier organic anion transporter family, member 1b2	0.281383	11	3.71812	0.0602164	0.342946
ENSMUSG00000037820	ENSMUSG00000037820	21817	Tgm2	transglutaminase 2, C polypeptide	-0.376285	6.99632	3.72897	0.0602274	0.342946
ENSMUSG00000031683	ENSMUSG00000031683	78651	Lsm6	LSM6 homolog, U6 small nuclear RNA and mRNA degradation associated	0.247014	5.67232	3.7174	0.0602401	0.342946
ENSMUSG00000024276	ENSMUSG00000024276	69256	Zfp397	zinc finger protein 397	0.439364	2.72288	3.71665	0.0602649	0.342946
ENSMUSG00000020225	ENSMUSG00000020225	68212	Tmbim4	transmembrane BAX inhibitor motif containing 4	-0.233679	6.27979	3.71518	0.0603139	0.343041
ENSMUSG00000007415	ENSMUSG00000007415	67210	Gatad1	GATA zinc finger domain containing 1	-0.242347	5.87941	3.71329	0.0603765	0.343041
ENSMUSG00000059395	ENSMUSG00000059395	66707	Nkapl	NFKB activating protein-like	0.825249	0.836001	3.71327	0.0603772	0.343041
ENSMUSG00000004771	ENSMUSG00000004771	53869	Rab11a	RAB11A, member RAS oncogene family	-0.225771	5.96987	3.71013	0.0604817	0.343453
ENSMUSG00000026692	ENSMUSG00000026692	226564	Fmo4	flavin containing monooxygenase 4	-0.588778	2.47763	3.70869	0.0605298	0.343545
ENSMUSG00000025782	ENSMUSG00000025782	209361	Taf3	TATA-box binding protein associated factor 3	0.335383	3.74664	3.70741	0.0605725	0.343606
ENSMUSG00000021996	ENSMUSG00000021996	13885	Esd	esterase D/formylglutathione hydrolase	-0.235044	8.16796	3.70534	0.0606415	0.343816
ENSMUSG00000049577	ENSMUSG00000049577	22761	Zfpm1	zinc finger protein, multitype 1	0.29286	5.51163	3.70425	0.060678	0.343842
ENSMUSG00000026571	ENSMUSG00000026571	74106	Dcaf6	DDB1 and CUL4 associated factor 6	0.315846	5.38529	3.69894	0.0608556	0.344667
ENSMUSG00000026239	ENSMUSG00000026239	18582	Pde6d	phosphodiesterase 6D, cGMP-specific, rod, delta	-0.450834	2.9564	3.69711	0.0609171	0.344834
ENSMUSG00000018572	ENSMUSG00000018572	78246	Phf23	PHD finger protein 23	0.268666	4.72412	3.69524	0.0609798	0.345007
ENSMUSG00000046572	ENSMUSG00000046572	100515	Zfp518b	zinc finger protein 518B	-0.725642	1.12121	3.69383	0.0610274	0.345095
ENSMUSG00000035142	ENSMUSG00000035142	76826	Nubpl	nucleotide binding protein-like	-0.327849	3.4427	3.68809	0.0612206	0.345956
ENSMUSG00000022488	ENSMUSG00000022488	105855	Nckap1l	NCK associated protein 1 like	-0.618609	2.13127	3.68739	0.0612443	0.345956
ENSMUSG00000042508	ENSMUSG00000042508	23857	Dmtf1	cyclin D binding myb-like transcription factor 1	0.314129	3.7783	3.68645	0.0612761	0.345956
ENSMUSG00000018770	ENSMUSG00000018770	228033	Atp5g3	ATP synthase, H+ transporting, mitochondrial F0 complex, subunit C3 (subunit 9)	-0.255937	10.0827	3.68062	0.0614734	0.346888
ENSMUSG00000051412	ENSMUSG00000051412	20955	Vamp7	vesicle-associated membrane protein 7	0.30953	4.55622	3.67817	0.0615568	0.347176
ENSMUSG00000033634	ENSMUSG00000033634	93673	Nat8f2	N-acetyltransferase 8 (GCN5-related) family member 2	0.310297	8.77583	3.67683	0.0616021	0.34725
ENSMUSG00000045538	ENSMUSG00000045538	71986	Ddx28	DEAD (Asp-Glu-Ala-Asp) box polypeptide 28	-0.322643	3.74203	3.67454	0.06168	0.347327
ENSMUSG00000062825	ENSMUSG00000062825	11465	Actg1	actin, gamma, cytoplasmic 1	-0.42072	7.61363	3.69381	0.0616804	0.347327
ENSMUSG00000044176	ENSMUSG00000044176	328971	Spink10	serine peptidase inhibitor, Kazal type 10	0.690829	1.70333	3.66896	0.0618705	0.347766
ENSMUSG00000007812	ENSMUSG00000007812	72611	Zfp655	zinc finger protein 655	-0.269191	4.74359	3.66758	0.0619175	0.347766
ENSMUSG00000028601	ENSMUSG00000028601	52430	Echdc2	enoyl Coenzyme A hydratase domain containing 2	0.170702	7.02738	3.6671	0.0619337	0.347766
ENSMUSG00000030605	ENSMUSG00000030605	17304	Mfge8	milk fat globule-EGF factor 8 protein	-0.599544	5.01432	3.69948	0.0619737	0.347766
ENSMUSG00000032171	ENSMUSG00000032171	23988	Pin1	protein (peptidyl-prolyl cis/trans isomerase) NIMA-interacting 1	0.320204	3.88816	3.66526	0.0619967	0.347766
ENSMUSG00000021210	ENSMUSG00000021210	83702	Akr1c6	aldo-keto reductase family 1, member C6	0.329404	9.61532	3.66477	0.0620137	0.347766
ENSMUSG00000053644	ENSMUSG00000053644	110695	Aldh7a1	aldehyde dehydrogenase family 7, member A1	0.205655	8.23132	3.6644	0.0620264	0.347766
ENSMUSG00000020368	ENSMUSG00000020368	12330	Canx	calnexin	0.174968	7.65574	3.6627	0.0620845	0.347766
ENSMUSG00000060791	ENSMUSG00000060791	63986	Gmfg	glia maturation factor, gamma	-0.515179	3.43583	3.66448	0.0621424	0.347766
ENSMUSG00000021809	ENSMUSG00000021809	67725	Nudt13	nudix (nucleoside diphosphate linked moiety X)-type motif 13	-0.309409	3.86233	3.6606	0.0621567	0.347766
ENSMUSG00000040813	ENSMUSG00000040813	21767	Tex264	testis expressed gene 264	-0.197882	5.91119	3.66044	0.0621622	0.347766
ENSMUSG00000022234	ENSMUSG00000022234	12465	Cct5	chaperonin containing Tcp1, subunit 5 (epsilon)	0.243694	5.84146	3.66031	0.0621666	0.347766
ENSMUSG00000094806	ENSMUSG00000094806	13101	Cyp2d10	cytochrome P450, family 2, subfamily d, polypeptide 10	0.331052	8.78509	3.65857	0.0622399	0.347766
ENSMUSG00000002052	ENSMUSG00000002052	20926	Supt6	suppressor of Ty 6	0.39341	4.49325	3.65929	0.0622481	0.347766
ENSMUSG00000032679	ENSMUSG00000032679	12509	Cd59a	CD59a antigen	-0.163304	7.38046	3.65755	0.0622614	0.347766
ENSMUSG00000049047	ENSMUSG00000049047	71703	Armcx3	armadillo repeat containing, X-linked 3	-0.476392	2.87676	3.65709	0.0622771	0.347766
ENSMUSG00000042251	ENSMUSG00000042251	212933	Pm20d1	peptidase M20 domain containing 1	0.21531	5.91845	3.6562	0.0623077	0.347766
ENSMUSG00000040021	ENSMUSG00000040021	16798	Lats1	large tumor suppressor	0.325093	3.704	3.65253	0.0624343	0.348292
ENSMUSG00000074364	ENSMUSG00000074364	259300	Ehd2	EH-domain containing 2	-0.829546	1.0655	3.64989	0.0625254	0.348324
ENSMUSG00000034168	ENSMUSG00000034168	238330	Irf2bpl	interferon regulatory factor 2 binding protein-like	0.303576	4.94498	3.64981	0.0625283	0.348324
ENSMUSG00000025854	ENSMUSG00000025854	80752	Fam20c	family with sequence similarity 20, member C	0.283536	4.75153	3.64896	0.0625574	0.348324
ENSMUSG00000037197	ENSMUSG00000037197	76938	Rbm17	RNA binding motif protein 17	-0.222995	5.59937	3.64804	0.0625893	0.348324
ENSMUSG00000022797	ENSMUSG00000022797	22042	Tfrc	transferrin receptor	-0.435151	2.99969	3.64768	0.0626019	0.348324
ENSMUSG00000050545	ENSMUSG00000050545	207921	Fam228b	family with sequence similarity 228, member B	0.574685	1.67574	3.64486	0.0626996	0.348688
ENSMUSG00000021196	ENSMUSG00000021196	56421	Pfkp	phosphofructokinase, platelet	-0.623912	1.78048	3.64093	0.0628357	0.349264
ENSMUSG00000028271	ENSMUSG00000028271	229906	Gtf2b	general transcription factor IIB	-0.530972	3.59213	3.64579	0.0629508	0.349723
ENSMUSG00000087107	ENSMUSG00000087107	100043636	AI662270	expressed sequence AI662270	-0.758442	1.17666	3.63414	0.0630721	0.350094
ENSMUSG00000045210	ENSMUSG00000045210	70675	Vcpip1	valosin containing protein (p97)/p47 complex interacting protein 1	0.274799	4.51078	3.63363	0.0630899	0.350094
ENSMUSG00000033287	ENSMUSG00000033287	72844	Kctd17	potassium channel tetramerisation domain containing 17	-0.76373	2.39879	3.64035	0.0631376	0.350094
ENSMUSG00000031879	ENSMUSG00000031879	68523	Ciao2b	cytosolic iron-sulfur assembly component 2B	-0.335288	3.73454	3.63198	0.0631477	0.350094
ENSMUSG00000032740	ENSMUSG00000032740	108686	Ccdc88a	coiled coil domain containing 88A	-0.487133	3.02614	3.63036	0.0632041	0.350226
ENSMUSG00000053134	ENSMUSG00000053134	72195	Supt7l	suppressor of Ty 7-like	0.39673	2.75412	3.62933	0.0632404	0.350247
ENSMUSG00000033658	ENSMUSG00000033658	234733	Ddx19b	DEAD (Asp-Glu-Ala-Asp) box polypeptide 19b	0.420266	2.94897	3.62521	0.0633846	0.350865
ENSMUSG00000026103	ENSMUSG00000026103	14660	Gls	glutaminase	-0.476963	2.61717	3.622	0.0634971	0.351307
ENSMUSG00000096210	ENSMUSG00000096210	14958	H1f0	H1 histone family, member 0	0.214719	6.4596	3.62057	0.0635475	0.351312
ENSMUSG00000040441	ENSMUSG00000040441	216441	Slc26a10	solute carrier family 26, member 10	-0.819952	1.3899	3.62013	0.0635632	0.351312
ENSMUSG00000041849	ENSMUSG00000041849	239319	Card6	caspase recruitment domain family, member 6	0.433487	2.97631	3.61294	0.0638166	0.352239
ENSMUSG00000050002	ENSMUSG00000050002	75731	Idnk	idnK gluconokinase homolog (E. coli)	-0.237597	5.10897	3.61236	0.0638371	0.352239
ENSMUSG00000040722	ENSMUSG00000040722	56807	Scamp5	secretory carrier membrane protein 5	-0.477616	3.42049	3.61193	0.0638524	0.352239
ENSMUSG00000073460	ENSMUSG00000073460	240023	Pnldc1	poly(A)-specific ribonuclease (PARN)-like domain containing 1	-0.630852	4.28756	3.64186	0.0638775	0.352239
ENSMUSG00000022512	ENSMUSG00000022512	12737	Cldn1	claudin 1	0.619872	5.44158	3.64753	0.0638949	0.352239
ENSMUSG00000024966	ENSMUSG00000024966	20867	Stip1	stress-induced phosphoprotein 1	0.296907	5.16555	3.60929	0.0639457	0.352239
ENSMUSG00000046314	ENSMUSG00000046314	217517	Stxbp6	syntaxin binding protein 6 (amisyn)	-0.387592	3.03318	3.60637	0.0640492	0.352239
ENSMUSG00000005682	ENSMUSG00000005682	103135	Pan2	PAN2 poly(A) specific ribonuclease subunit	0.568027	4.82508	3.63592	0.0640572	0.352239
ENSMUSG00000005087	ENSMUSG00000005087	12505	Cd44	CD44 antigen	-0.502704	4.00099	3.61713	0.0640647	0.352239
ENSMUSG00000028270	ENSMUSG00000028270	14469	Gbp2	guanylate binding protein 2	-0.824457	2.88335	3.62858	0.0640926	0.352239
ENSMUSG00000028291	ENSMUSG00000028291	433693	Akirin2	akirin 2	-0.30862	4.31565	3.60283	0.064175	0.352239
ENSMUSG00000042249	ENSMUSG00000042249	320129	Grk3	G protein-coupled receptor kinase 3	-0.631983	2.55567	3.6018	0.0642116	0.352239
ENSMUSG00000042608	ENSMUSG00000042608	74178	Stk40	serine/threonine kinase 40	0.279503	4.84285	3.60118	0.0642338	0.352239
ENSMUSG00000026096	ENSMUSG00000026096	72085	Osgepl1	O-sialoglycoprotein endopeptidase-like 1	0.368638	3.69515	3.6006	0.0642543	0.352239
ENSMUSG00000017491	ENSMUSG00000017491	218772	Rarb	retinoic acid receptor, beta	-0.766697	1.38779	3.60021	0.0642684	0.352239
ENSMUSG00000046707	ENSMUSG00000046707	13000	Csnk2a2	casein kinase 2, alpha prime polypeptide	0.232983	5.86889	3.59946	0.0642949	0.352239
ENSMUSG00000015839	ENSMUSG00000015839	18024	Nfe2l2	nuclear factor, erythroid derived 2, like 2	-0.221978	6.64152	3.59931	0.0643003	0.352239
ENSMUSG00000033174	ENSMUSG00000033174	23945	Mgll	monoglyceride lipase	-0.279902	8.69686	3.59875	0.0643202	0.352239
ENSMUSG00000028646	ENSMUSG00000028646	54170	Rragc	Ras-related GTP binding C	-0.234284	5.07971	3.5962	0.0644111	0.352558
ENSMUSG00000021838	ENSMUSG00000021838	74480	Samd4	sterile alpha motif domain containing 4	-0.433921	3.23985	3.59423	0.0644817	0.352764
ENSMUSG00000024978	ENSMUSG00000024978	14732	Gpam	glycerol-3-phosphate acyltransferase, mitochondrial	-0.316772	7.34416	3.58883	0.0646752	0.353643
ENSMUSG00000026361	ENSMUSG00000026361	214498	Cdc73	cell division cycle 73, Paf1/RNA polymerase II complex component	0.254776	4.44597	3.58401	0.0648482	0.354169
ENSMUSG00000063275	ENSMUSG00000063275	30963	Hacd1	3-hydroxyacyl-CoA dehydratase 1	-0.328882	3.5174	3.58354	0.0648651	0.354169
ENSMUSG00000019948	ENSMUSG00000019948	67019	Actr6	ARP6 actin-related protein 6	0.328528	3.67165	3.5834	0.0648702	0.354169
ENSMUSG00000026193	ENSMUSG00000026193	14268	Fn1	fibronectin 1	0.235507	8.99552	3.57972	0.0650027	0.354371
ENSMUSG00000055725	ENSMUSG00000055725	231474	Paqr3	progestin and adipoQ receptor family member III	0.51473	1.75867	3.57882	0.0650352	0.354371
ENSMUSG00000049305	ENSMUSG00000049305	72454	Ccdc71	coiled-coil domain containing 71	0.344317	3.78385	3.57859	0.0650434	0.354371
ENSMUSG00000031355	ENSMUSG00000031355	11856	Arhgap6	Rho GTPase activating protein 6	0.413087	3.33773	3.57789	0.0650685	0.354371
ENSMUSG00000006356	ENSMUSG00000006356	68337	Crip2	cysteine rich protein 2	0.369793	5.93474	3.58647	0.0650717	0.354371
ENSMUSG00000056952	ENSMUSG00000056952	381801	Tatdn2	TatD DNase domain containing 2	0.284281	4.55297	3.57482	0.0651795	0.354778
ENSMUSG00000000305	ENSMUSG00000000305	12561	Cdh4	cadherin 4	-0.879015	0.836942	3.57245	0.0652655	0.355067
ENSMUSG00000038526	ENSMUSG00000038526	23831	Car14	carbonic anhydrase 14	0.476164	5.3683	3.58984	0.0654228	0.355743
ENSMUSG00000027808	ENSMUSG00000027808	28146	Serp1	stress-associated endoplasmic reticulum protein 1	0.194682	7.12415	3.56601	0.0654993	0.355979
ENSMUSG00000005268	ENSMUSG00000005268	19116	Prlr	prolactin receptor	0.406026	6.50331	3.57899	0.0656437	0.356274
ENSMUSG00000050931	ENSMUSG00000050931	74442	Sgms2	sphingomyelin synthase 2	0.261692	5.91067	3.56151	0.0656629	0.356274
ENSMUSG00000031740	ENSMUSG00000031740	17390	Mmp2	matrix metallopeptidase 2	-0.992149	2.47563	3.58655	0.065745	0.356274
ENSMUSG00000021945	ENSMUSG00000021945	76007	Zmym2	zinc finger, MYM-type 2	0.260851	3.96345	3.55905	0.0657527	0.356274
ENSMUSG00000024393	ENSMUSG00000024393	53761	Prrc2a	proline-rich coiled-coil 2A	0.390599	3.92341	3.55861	0.065769	0.356274
ENSMUSG00000000247	ENSMUSG00000000247	16870	Lhx2	LIM homeobox protein 2	-0.379092	2.64674	3.55835	0.0657785	0.356274
ENSMUSG00000060470	ENSMUSG00000060470	54672	Adgrg3	adhesion G protein-coupled receptor G3	-0.452496	2.4462	3.55816	0.0657853	0.356274
ENSMUSG00000026189	ENSMUSG00000026189	111175	Pecr	peroxisomal trans-2-enoyl-CoA reductase	0.338426	7.81579	3.55981	0.0658944	0.356426
ENSMUSG00000032727	ENSMUSG00000032727	218613	Mier3	MIER family member 3	0.274338	4.25682	3.55469	0.0659124	0.356426
ENSMUSG00000042851	ENSMUSG00000042851	78751	Zc3h6	zinc finger CCCH type containing 6	0.466638	2.30804	3.55468	0.0659127	0.356426
ENSMUSG00000029291	ENSMUSG00000029291	52822	Rufy3	RUN and FYVE domain containing 3	0.283439	5.49672	3.55091	0.0660509	0.356923
ENSMUSG00000007872	ENSMUSG00000007872	15903	Id3	inhibitor of DNA binding 3	-0.537137	6.28063	3.58147	0.0661069	0.356923
ENSMUSG00000002413	ENSMUSG00000002413	109880	Braf	Braf transforming gene	0.320893	4.30562	3.5489	0.0661248	0.356923
ENSMUSG00000051234	ENSMUSG00000051234	19823	Rnf7	ring finger protein 7	-0.490518	4.46	3.56446	0.066158	0.356923
ENSMUSG00000005102	ENSMUSG00000005102	27103	Eif2ak4	eukaryotic translation initiation factor 2 alpha kinase 4	-0.353668	3.13037	3.54626	0.0662219	0.356923
ENSMUSG00000021495	ENSMUSG00000021495	212483	Fam193b	family with sequence similarity 193, member B	0.209175	5.48702	3.54564	0.0662448	0.356923
ENSMUSG00000035152	ENSMUSG00000035152	71770	Ap2b1	adaptor-related protein complex 2, beta 1 subunit	0.290458	5.15987	3.54445	0.0662887	0.356923
ENSMUSG00000048440	ENSMUSG00000048440	70101	Cyp4f16	cytochrome P450, family 4, subfamily f, polypeptide 16	-1.01189	0.944642	3.54443	0.0662893	0.356923
ENSMUSG00000026380	ENSMUSG00000026380	81879	Tfcp2l1	transcription factor CP2-like 1	-0.642902	1.87662	3.54405	0.0663031	0.356923
[truncated: 8,762 more rows]
