# Supplementary material for: Tetrahydroxanthohumol, a xanthohumol derivative, attenuates high-fat diet-induced hepatic steatosis by antagonizing PPARγ
Source: eLife journal article supplement (doi:10.7554/elife.66398), 2021-06-14
Supplement: fig8-data1 [file txnHFDGO.pdf › Figure8/txnHFDGO.pdf]

Enriched Biological Process

Down Regulation

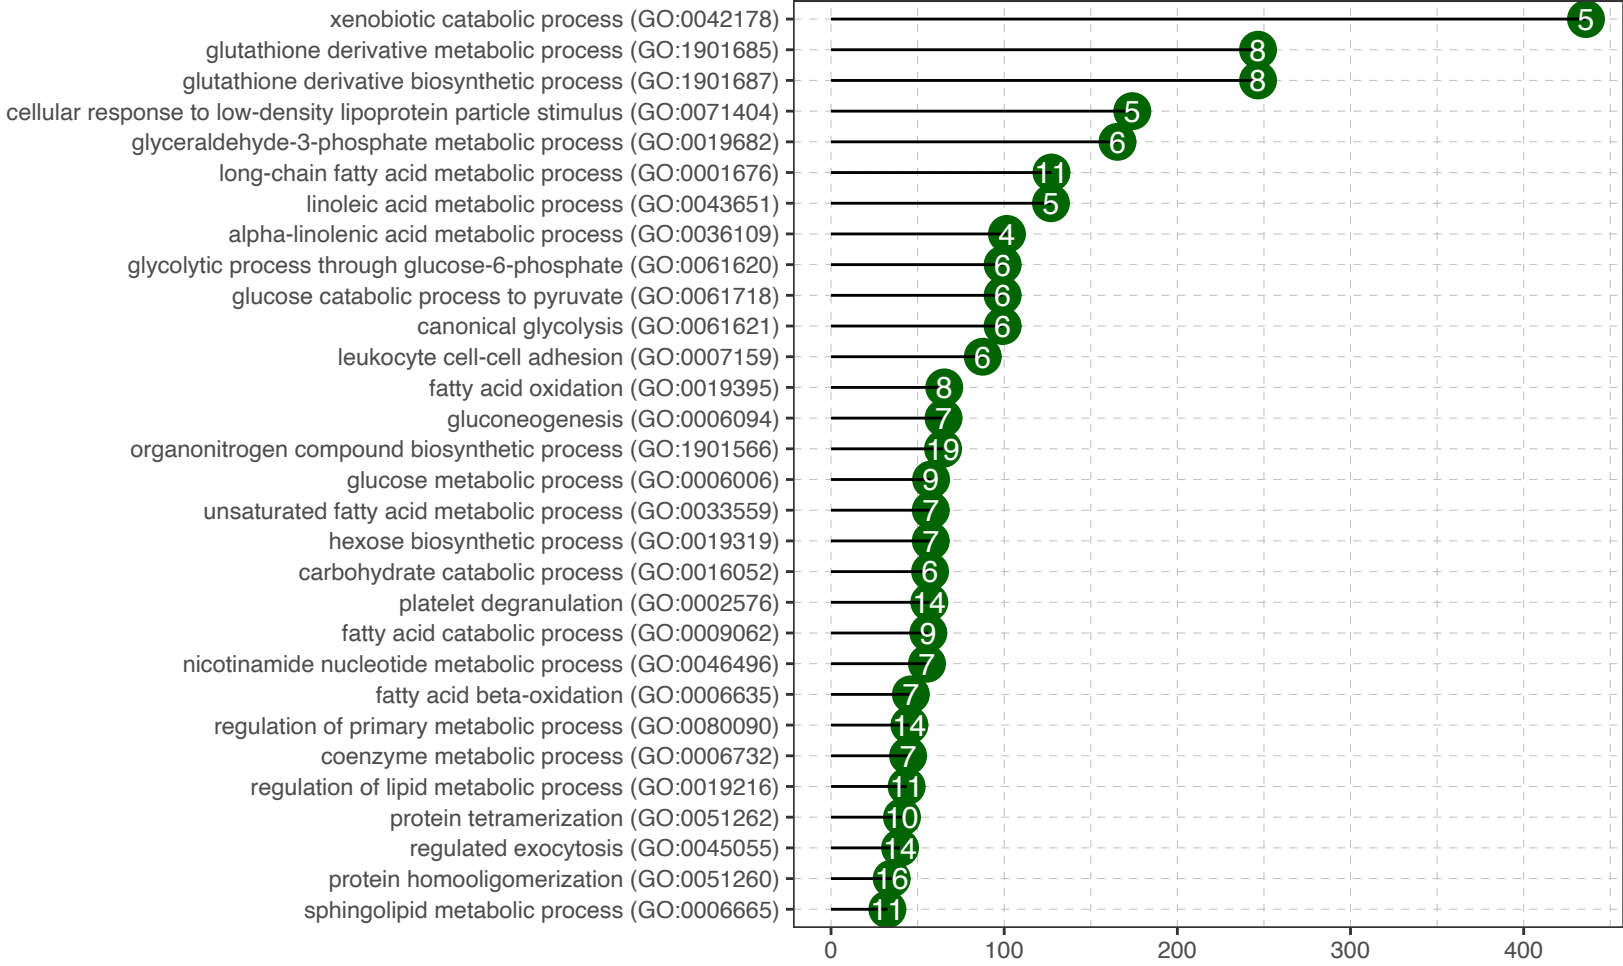

Enriched KEGG Pathway

Down Regulation

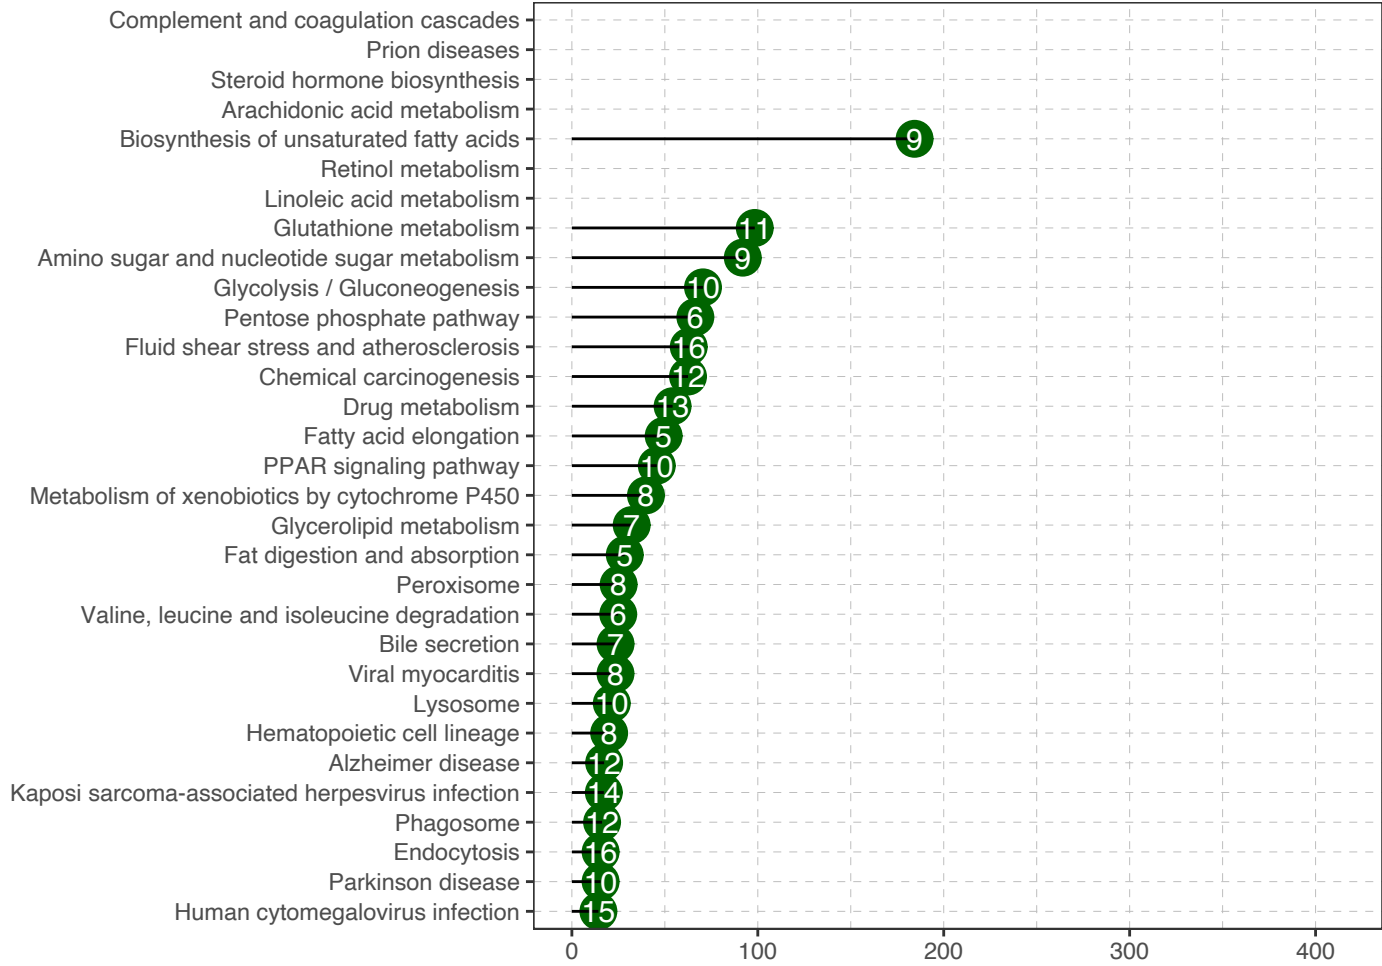

Up Regulation

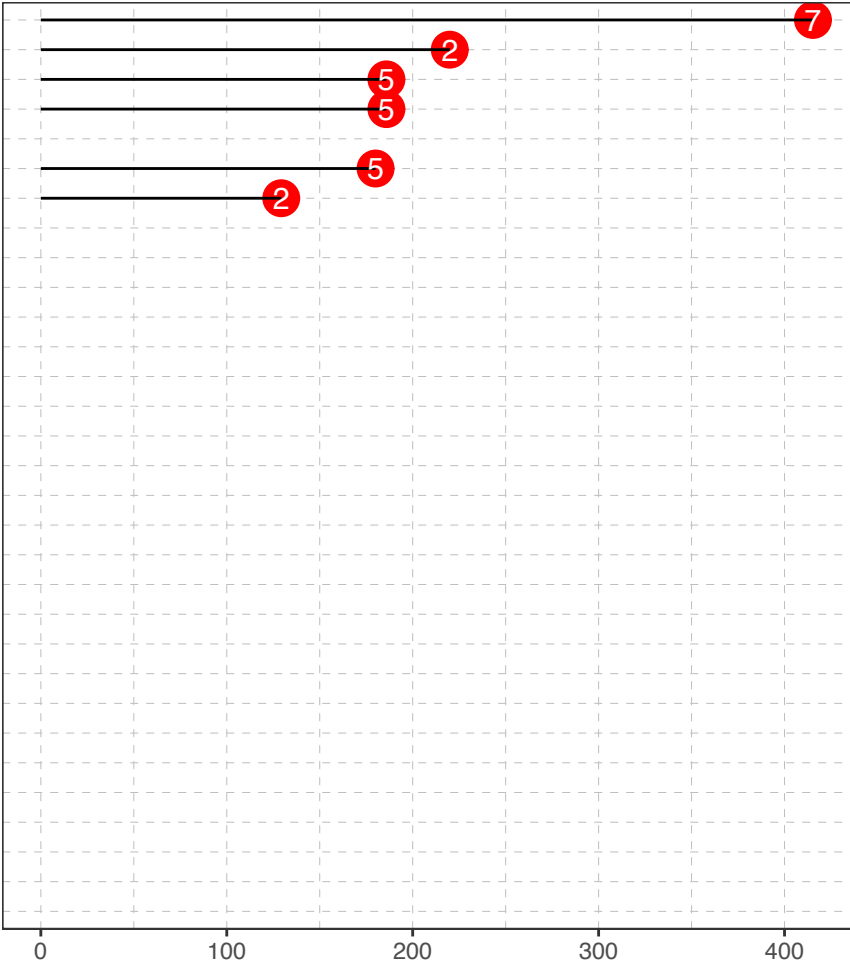

combined score
