# Supplementary material for: Tetrahydroxanthohumol, a xanthohumol derivative, attenuates high-fat diet-induced hepatic steatosis by antagonizing PPARγ
Source: eLife journal article supplement (doi:10.7554/elife.66398), 2021-06-14
Supplement: fig9-data1 [file elife-66398-fig9-data1-v1.zip]

## Attributes importance by RReliefF

Top features

ENSMUSG00000033685  
ENSMUSG00000094793  
ENSMUSG00000021226  
ENSMUSG00000030278  
ENSMUSG00000043013  
ENSMUSG00000036390  
ENSMUSG00000067219  
ENSMUSG00000035186  
ENSMUSG00000019942  
ENSMUSG00000012187  
ENSMUSG00000026390  
ENSMUSG00000031842  
ENSMUSG00000046873

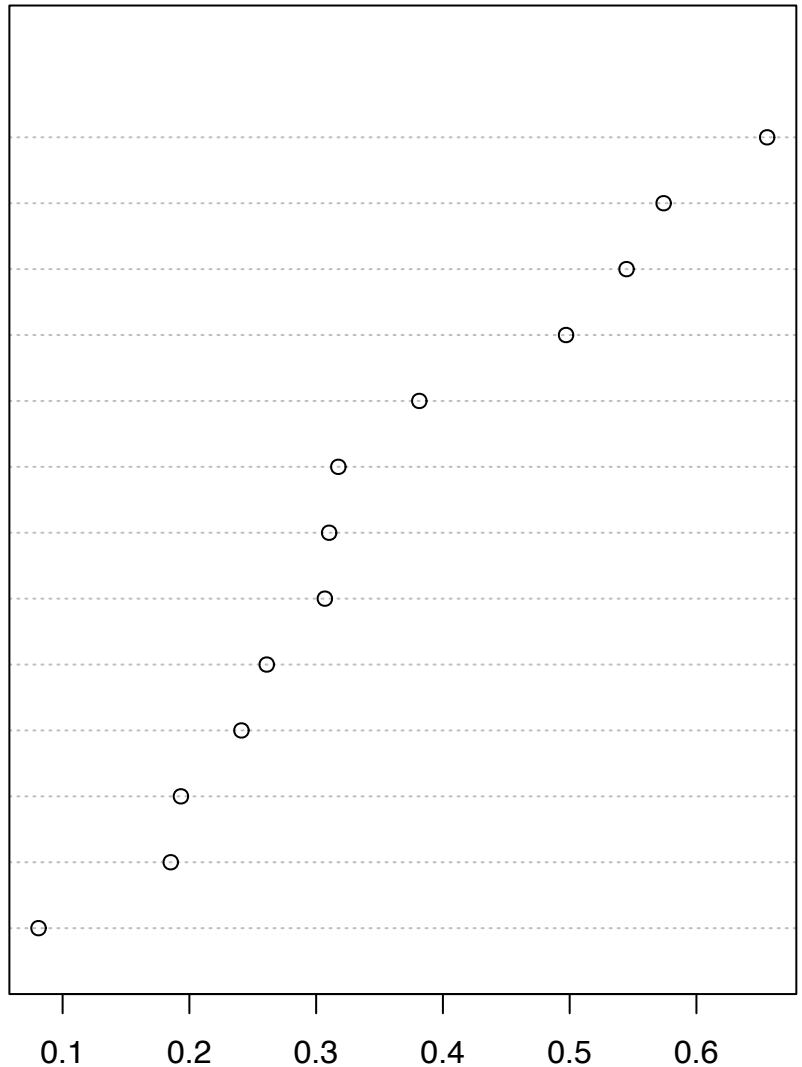

RReliefF importance
