# Supplementary material for: Tetrahydroxanthohumol, a xanthohumol derivative, attenuates high-fat diet-induced hepatic steatosis by antagonizing PPARγ
Source: eLife journal article supplement (doi:10.7554/elife.66398), 2021-06-14
Supplement: fig10-data1 [file elife-66398-fig10-data1-v1.zip]

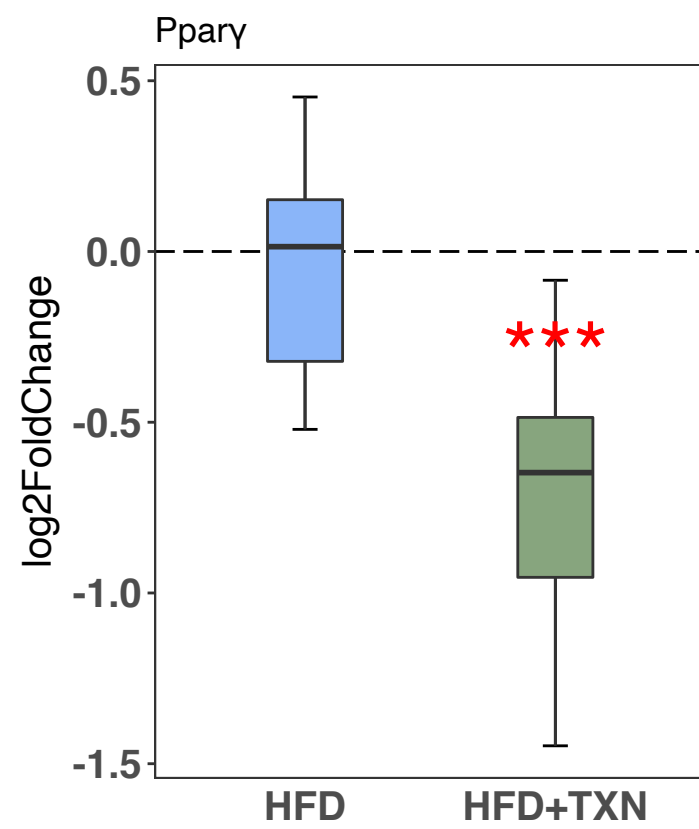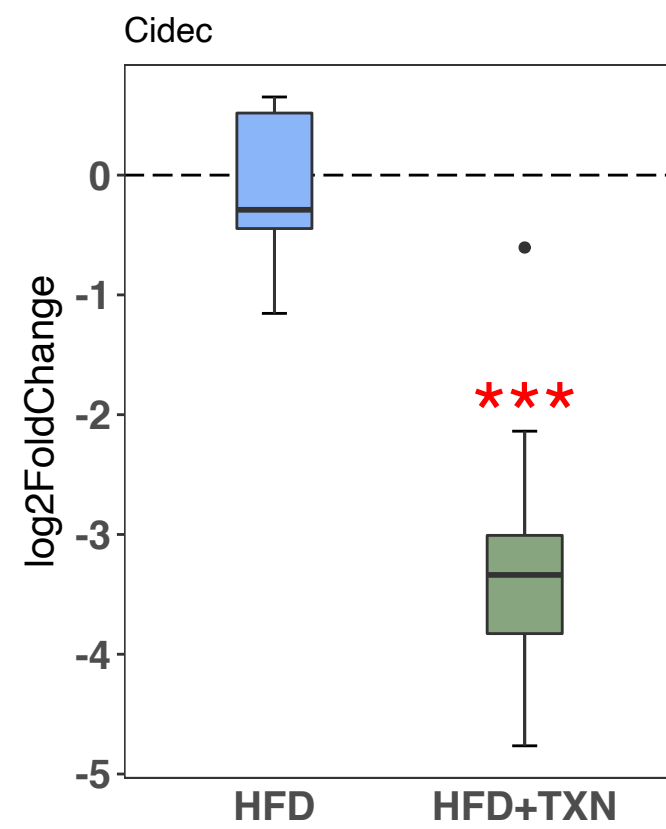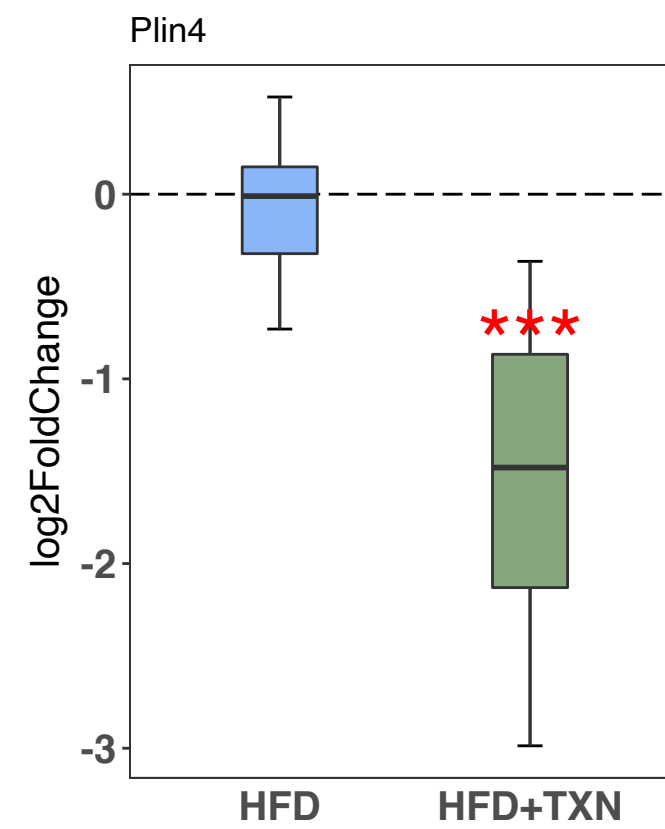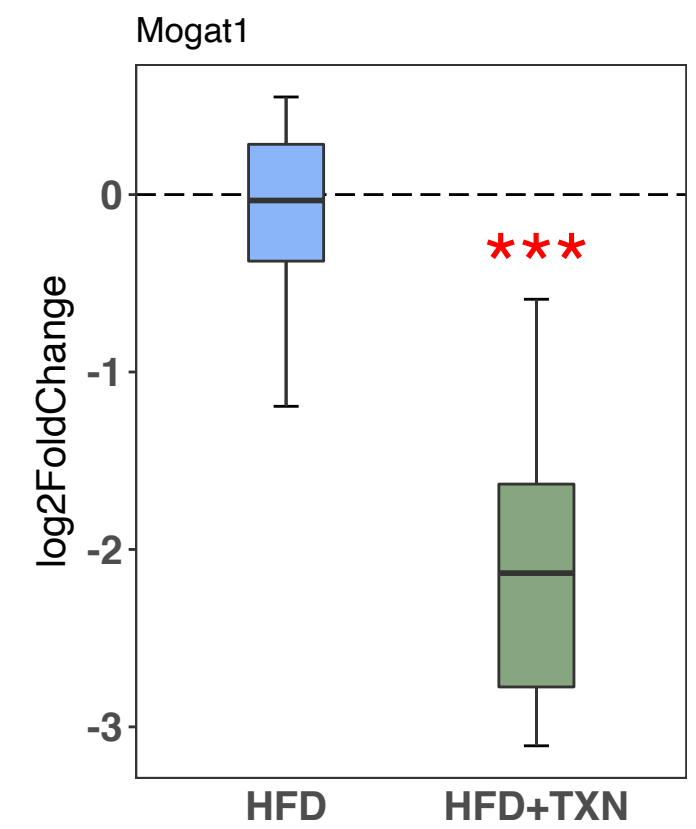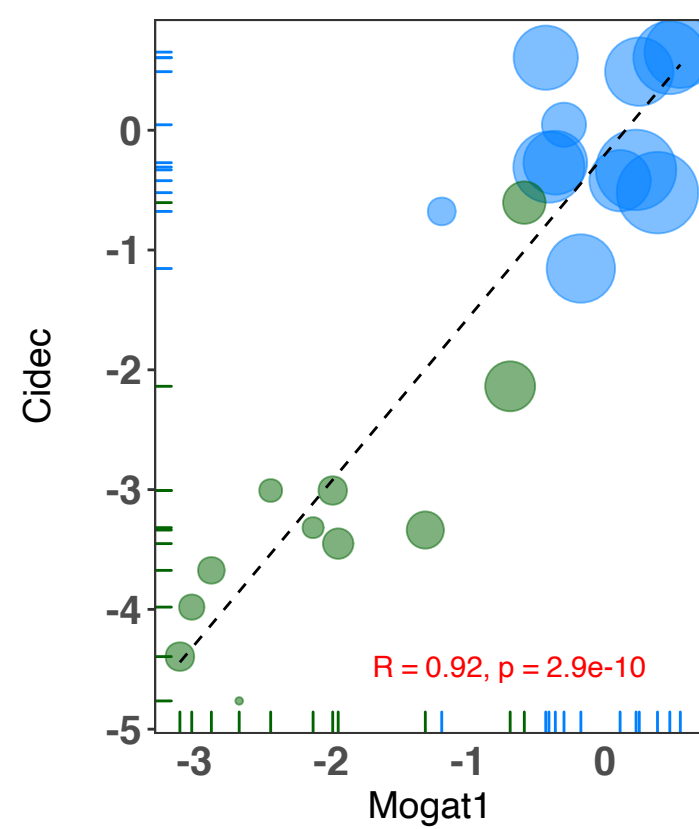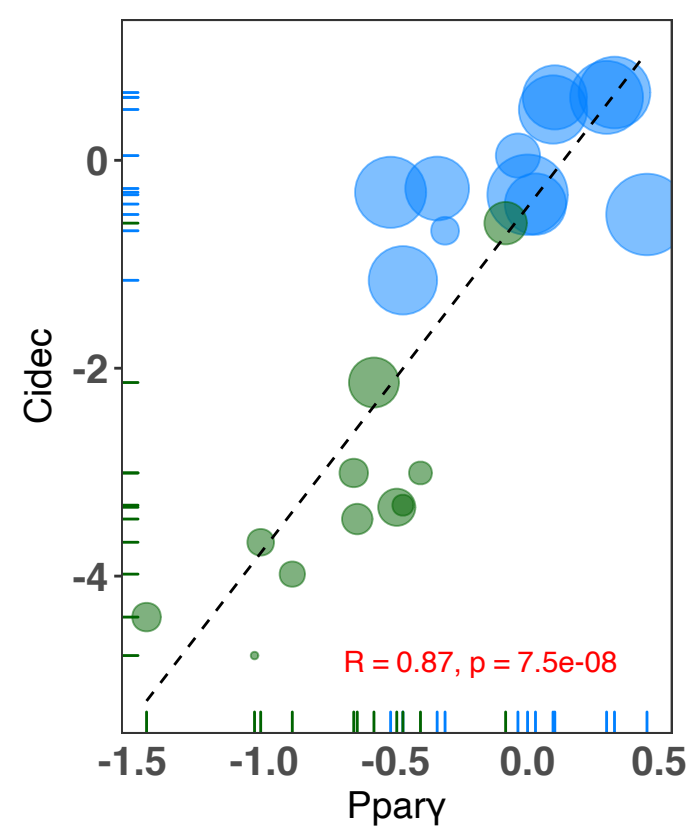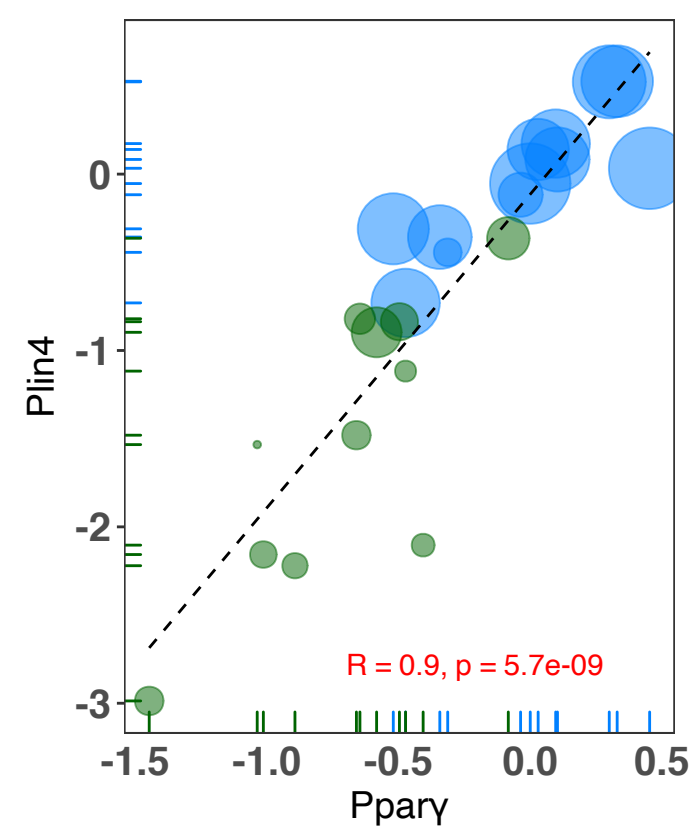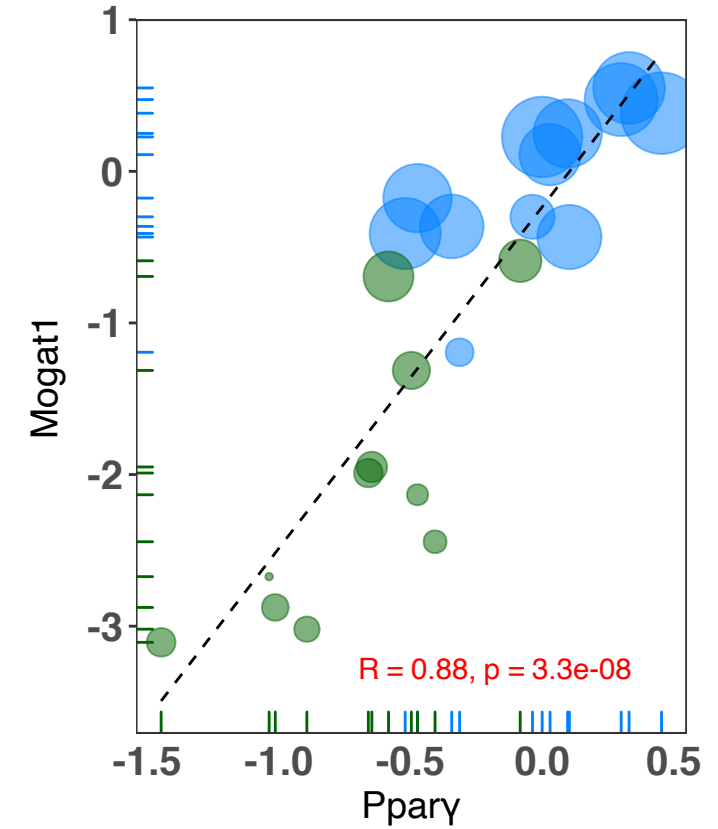

Liver mass:BW (%)

3 4 5 6

Detailed description: A legend for bubble size representing liver mass:BW (%). The sizes correspond to values 3, 4, 5, and 6, with larger bubbles representing higher values.
