# Supplementary material for: Tetrahydroxanthohumol, a xanthohumol derivative, attenuates high-fat diet-induced hepatic steatosis by antagonizing PPARγ
Source: eLife. 2021 Jun 15;10:e66398. doi: 10.7554/eLife.66398 (PMC8205491; doi:10.7554/eLife.66398)
Supplement: Source data 1. [file elife-66398-data1.xlsx]

## Sheet: LFDvs.HFD
	gene.id	entrez	symbol	gene.name	logFC	logCPM	F	PValue	FDR
ENSMUSG00000052595	ENSMUSG00000052595	69865	A1cf	APOBEC1 complementation factor	0.275866	4.83372	1.40739	0.242282	0.679697
ENSMUSG00000047228	ENSMUSG00000047228	232400	A2ml1	alpha-2-macroglobulin like 1	-0.150464	5.84351	0.842731	0.363563	0.767569
ENSMUSG00000097353	ENSMUSG00000097353	654440	A430046D13Rik	Riken cDNA A430046D13 gene	-0.204036	0.974922	0.302026	0.585361	0.870518
ENSMUSG00000093483	ENSMUSG00000093483	613254	AA465934	expressed sequence AA465934	-0.207786	2.16988	0.499604	0.483357	0.829294
ENSMUSG00000036678	ENSMUSG00000036678	223921	Aaas	achalasia, adrenocortical insufficiency, alacrimia	0.123689	3.17654	0.45325	0.504275	0.839402
ENSMUSG00000029482	ENSMUSG00000029482	78894	Aacs	acetoacetyl-CoA synthetase	-0.627949	4.81876	3.00348	0.0914541	0.509064
ENSMUSG00000027761	ENSMUSG00000027761	67758	Aadac	arylacetamide deacetylase	-0.238398	8.68724	1.01332	0.320239	0.737014
ENSMUSG00000057228	ENSMUSG00000057228	23923	Aadat	aminoadipate aminotransferase	-0.0656743	5.80959	0.0838377	0.773649	0.93981
ENSMUSG00000037257	ENSMUSG00000037257	66939	Aagab	alpha- and gamma-adaptin binding protein	-0.10539	4.55866	0.60256	0.441707	0.810722
ENSMUSG00000057230	ENSMUSG00000057230	269774	Aak1	AP2 associated kinase 1	-0.0651319	4.38564	0.21378	0.646072	0.898895
ENSMUSG00000035642	ENSMUSG00000035642	66273	Aamdc	adipogenesis associated Mth938 domain containing	0.125567	4.80892	0.739629	0.394387	0.783875
ENSMUSG00000006299	ENSMUSG00000006299	227290	Aamp	angio-associated migratory protein	-0.0873254	7.37772	0.286272	0.595284	0.874738
ENSMUSG00000027628	ENSMUSG00000027628	68295	Aar2	AAR2 splicing factor homolog	-0.138947	3.05929	0.478513	0.492688	0.832098
ENSMUSG00000031960	ENSMUSG00000031960	234734	Aars	alanyl-tRNA synthetase	-0.169225	6.57487	2.22278	0.143039	0.590178
ENSMUSG00000023938	ENSMUSG00000023938	224805	Aars2	alanyl-tRNA synthetase 2, mitochondrial	-0.273686	2.70969	1.73867	0.19405	0.648691
ENSMUSG00000055923	ENSMUSG00000055923	231326	Aasdh	aminoadipate-semialdehyde dehydrogenase	0.132801	2.66415	0.693843	0.409306	0.791615
ENSMUSG00000025894	ENSMUSG00000025894	67618	Aasdhppt	aminoadipate-semialdehyde dehydrogenase-phosphopantetheinyl transferase	0.0779218	4.16376	0.156483	0.694304	0.915838
ENSMUSG00000029695	ENSMUSG00000029695	30956	Aass	aminoadipate-semialdehyde synthase	0.114122	7.38248	0.394827	0.533118	0.849634
ENSMUSG00000018697	ENSMUSG00000018697	56321	Aatf	apoptosis antagonizing transcription factor	0.0269628	4.25454	0.0291115	0.865295	0.963175
ENSMUSG00000025375	ENSMUSG00000025375	11302	Aatk	apoptosis-associated tyrosine kinase	-0.387179	4.40121	1.77038	0.191018	0.64599
ENSMUSG00000057880	ENSMUSG00000057880	268860	Abat	4-aminobutyrate aminotransferase	-0.168135	7.0771	2.33853	0.133282	0.582738
ENSMUSG00000015243	ENSMUSG00000015243	11303	Abca1	ATP-binding cassette, sub-family A (ABC1), member 1	-0.0912029	6.47284	0.336621	0.564711	0.860622
ENSMUSG00000026944	ENSMUSG00000026944	11305	Abca2	ATP-binding cassette, sub-family A (ABC1), member 2	0.181499	4.02044	0.960918	0.332252	0.746967
ENSMUSG00000024130	ENSMUSG00000024130	27410	Abca3	ATP-binding cassette, sub-family A (ABC1), member 3	-0.416394	4.68189	9.73776	0.00316495	0.135499
ENSMUSG00000018800	ENSMUSG00000018800	217265	Abca5	ATP-binding cassette, sub-family A (ABC1), member 5	0.359591	1.92443	1.57063	0.216656	0.665407
ENSMUSG00000044749	ENSMUSG00000044749	76184	Abca6	ATP-binding cassette, sub-family A (ABC1), member 6	-0.0247403	5.62601	0.0651667	0.799684	0.946365
ENSMUSG00000035722	ENSMUSG00000035722	27403	Abca7	ATP-binding cassette, sub-family A (ABC1), member 7	0.107799	1.81053	0.132298	0.717782	0.923174
ENSMUSG00000041828	ENSMUSG00000041828	217258	Abca8a	ATP-binding cassette, sub-family A (ABC1), member 8a	0.541592	5.80957	5.28891	0.0267917	0.329557
ENSMUSG00000020620	ENSMUSG00000020620	27404	Abca8b	ATP-binding cassette, sub-family A (ABC1), member 8b	-0.109904	4.69587	0.383512	0.538886	0.852354
ENSMUSG00000041797	ENSMUSG00000041797	217262	Abca9	ATP-binding cassette, sub-family A (ABC1), member 9	1.12677	1.07715	7.21608	0.0101179	0.225546
ENSMUSG00000031974	ENSMUSG00000031974	56199	Abcb10	ATP-binding cassette, sub-family B (MDR/TAP), member 10	-0.107762	4.19414	0.51253	0.477783	0.827527
ENSMUSG00000027048	ENSMUSG00000027048	27413	Abcb11	ATP-binding cassette, sub-family B (MDR/TAP), member 11	0.148175	7.64905	1.78392	0.188456	0.644038
ENSMUSG00000040584	ENSMUSG00000040584	18671	Abcb1a	ATP-binding cassette, sub-family B (MDR/TAP), member 1A	-0.889919	2.96658	16.5739	0.000189075	0.0250386
ENSMUSG00000028970	ENSMUSG00000028970	18669	Abcb1b	ATP-binding cassette, sub-family B (MDR/TAP), member 1B	-0.210335	1.82668	0.711527	0.403446	0.789327
ENSMUSG00000042476	ENSMUSG00000042476	18670	Abcb4	ATP-binding cassette, sub-family B (MDR/TAP), member 4	0.00714512	8.88104	0.00230009	0.961963	0.991457
ENSMUSG00000031333	ENSMUSG00000031333	11306	Abcb7	ATP-binding cassette, sub-family B (MDR/TAP), member 7	-0.0704335	4.01587	0.175254	0.677496	0.910553
ENSMUSG00000028973	ENSMUSG00000028973	74610	Abcb8	ATP-binding cassette, sub-family B (MDR/TAP), member 8	-0.336115	3.51395	4.04729	0.0503172	0.41146
ENSMUSG00000029408	ENSMUSG00000029408	56325	Abcb9	ATP-binding cassette, sub-family B (MDR/TAP), member 9	0.143126	1.21556	0.150667	0.699748	0.918401
ENSMUSG00000023088	ENSMUSG00000023088	17250	Abcc1	ATP-binding cassette, sub-family C (CFTR/MRP), member 1	0.146073	0.610232	0.0918317	0.763273	0.935713
ENSMUSG00000032842	ENSMUSG00000032842	224814	Abcc10	ATP-binding cassette, sub-family C (CFTR/MRP), member 10	-0.26533	2.11404	1.51833	0.224339	0.66799
ENSMUSG00000025194	ENSMUSG00000025194	12780	Abcc2	ATP-binding cassette, sub-family C (CFTR/MRP), member 2	-0.068994	8.43603	0.49403	0.485794	0.830046
ENSMUSG00000020865	ENSMUSG00000020865	76408	Abcc3	ATP-binding cassette, sub-family C (CFTR/MRP), member 3	-0.525842	5.96955	11.6797	0.00136046	0.0836564
ENSMUSG00000032849	ENSMUSG00000032849	239273	Abcc4	ATP-binding cassette, sub-family C (CFTR/MRP), member 4	-0.583634	1.26409	2.13184	0.151288	0.599413
ENSMUSG00000022822	ENSMUSG00000022822	27416	Abcc5	ATP-binding cassette, sub-family C (CFTR/MRP), member 5	0.190729	2.15857	0.468202	0.497362	0.833412
ENSMUSG00000030834	ENSMUSG00000030834	27421	Abcc6	ATP-binding cassette, sub-family C (CFTR/MRP), member 6	-0.0760955	5.19832	0.379074	0.541234	0.852603
ENSMUSG00000030249	ENSMUSG00000030249	20928	Abcc9	ATP-binding cassette, sub-family C (CFTR/MRP), member 9	0.0527287	4.32431	0.126308	0.723969	0.924829
ENSMUSG00000031378	ENSMUSG00000031378	11666	Abcd1	ATP-binding cassette, sub-family D (ALD), member 1	-0.300311	5.23557	1.82022	0.184671	0.639433
ENSMUSG00000055782	ENSMUSG00000055782	26874	Abcd2	ATP-binding cassette, sub-family D (ALD), member 2	-0.417596	4.65573	6.53877	0.0140352	0.2604
ENSMUSG00000028127	ENSMUSG00000028127	19299	Abcd3	ATP-binding cassette, sub-family D (ALD), member 3	-0.136399	8.89385	1.6511	0.205453	0.658736
ENSMUSG00000021240	ENSMUSG00000021240	19300	Abcd4	ATP-binding cassette, sub-family D (ALD), member 4	-0.226623	2.10894	0.816248	0.371141	0.772427
ENSMUSG00000058355	ENSMUSG00000058355	24015	Abce1	ATP-binding cassette, sub-family E (OABP), member 1	-0.290678	4.51849	3.02098	0.0891054	0.507066
ENSMUSG00000038762	ENSMUSG00000038762	224742	Abcf1	ATP-binding cassette, sub-family F (GCN20), member 1	0.162078	5.91533	0.75435	0.38995	0.780988
ENSMUSG00000028953	ENSMUSG00000028953	27407	Abcf2	ATP-binding cassette, sub-family F (GCN20), member 2	0.0283311	4.14479	0.040497	0.841428	0.957156
ENSMUSG00000003234	ENSMUSG00000003234	27406	Abcf3	ATP-binding cassette, sub-family F (GCN20), member 3	-0.195514	3.78261	1.08133	0.304014	0.725661
ENSMUSG00000024030	ENSMUSG00000024030	11307	Abcg1	ATP binding cassette subfamily G member 1	0.0932425	2.66743	0.115383	0.735694	0.929166
ENSMUSG00000029802	ENSMUSG00000029802	26357	Abcg2	ATP binding cassette subfamily G member 2 (Junior blood group)	-0.231842	6.29149	4.02086	0.0510423	0.41454
ENSMUSG00000029299	ENSMUSG00000029299	27405	Abcg3	ATP binding cassette subfamily G member 3	-0.622634	1.07128	2.18821	0.146111	0.594066
ENSMUSG00000040505	ENSMUSG00000040505	27409	Abcg5	ATP binding cassette subfamily G member 5	0.127038	5.40455	0.601218	0.442212	0.810722
ENSMUSG00000024254	ENSMUSG00000024254	67470	Abcg8	ATP binding cassette subfamily G member 8	0.173396	5.6829	1.11752	0.296154	0.719751
ENSMUSG00000006638	ENSMUSG00000006638	57742	Abhd1	abhydrolase domain containing 1	0.304024	2.1178	1.44054	0.236398	0.675103
ENSMUSG00000033157	ENSMUSG00000033157	213012	Abhd10	abhydrolase domain containing 10	0.0486804	2.47971	0.0395806	0.843209	0.957156
ENSMUSG00000040532	ENSMUSG00000040532	68758	Abhd11	abhydrolase domain containing 11	-0.0187537	4.13192	0.0206726	0.886323	0.968869
ENSMUSG00000032046	ENSMUSG00000032046	76192	Abhd12	abhydrolase domain containing 12	0.323191	4.41	4.45917	0.0403598	0.376028
ENSMUSG00000040396	ENSMUSG00000040396	68904	Abhd13	abhydrolase domain containing 13	0.0917681	3.5875	0.341585	0.561866	0.85925
ENSMUSG00000042210	ENSMUSG00000042210	68644	Abhd14a	abhydrolase domain containing 14A	0.321095	3.26496	2.78701	0.102048	0.531207
ENSMUSG00000042073	ENSMUSG00000042073	76491	Abhd14b	abhydrolase domain containing 14b	0.0537097	7.41273	0.204903	0.65299	0.902357
ENSMUSG00000000686	ENSMUSG00000000686	67477	Abhd15	abhydrolase domain containing 15	0.245778	2.84179	1.59849	0.212696	0.664527
ENSMUSG00000007036	ENSMUSG00000007036	193742	Abhd16a	abhydrolase domain containing 16A	-0.341828	5.2236	5.44277	0.0242285	0.313369
ENSMUSG00000003346	ENSMUSG00000003346	216169	Abhd17a	abhydrolase domain containing 17A	-0.27079	5.45947	4.71125	0.0353388	0.362172
ENSMUSG00000047368	ENSMUSG00000047368	226016	Abhd17b	abhydrolase domain containing 17B	0.319789	4.74313	7.67297	0.00814548	0.20771
ENSMUSG00000038459	ENSMUSG00000038459	70178	Abhd17c	abhydrolase domain containing 17C	0.0820058	6.97849	0.710281	0.403855	0.789586
ENSMUSG00000037818	ENSMUSG00000037818	269423	Abhd18	abhydrolase domain containing 18	0.118721	4.16452	0.726666	0.398528	0.78705
ENSMUSG00000039202	ENSMUSG00000039202	54608	Abhd2	abhydrolase domain containing 2	-0.532869	6.69974	3.99659	0.0528004	0.420138
ENSMUSG00000002475	ENSMUSG00000002475	106861	Abhd3	abhydrolase domain containing 3	-1.0467	4.83772	12.2527	0.0011984	0.0766453
ENSMUSG00000040997	ENSMUSG00000040997	105501	Abhd4	abhydrolase domain containing 4	-0.570069	5.19005	13.2516	0.000705898	0.0569472
ENSMUSG00000032540	ENSMUSG00000032540	67469	Abhd5	abhydrolase domain containing 5	-0.120098	4.5314	0.836521	0.36532	0.768602
ENSMUSG00000025277	ENSMUSG00000025277	66082	Abhd6	abhydrolase domain containing 6	-0.292765	5.70775	2.03269	0.161394	0.610245
ENSMUSG00000007950	ENSMUSG00000007950	64296	Abhd8	abhydrolase domain containing 8	0.195242	1.07332	0.355169	0.554219	0.856055
ENSMUSG00000058835	ENSMUSG00000058835	11308	Abi1	abl-interactor 1	-0.102297	4.27403	0.293781	0.59051	0.872138
ENSMUSG00000026782	ENSMUSG00000026782	329165	Abi2	abl-interactor 2	0.181121	2.27819	0.325165	0.571386	0.864762
ENSMUSG00000018381	ENSMUSG00000018381	66610	Abi3	ABI gene family, member 3	0.462047	3.11133	4.65611	0.0363761	0.364341
ENSMUSG00000035258	ENSMUSG00000035258	320712	Abi3bp	ABI gene family, member 3 (NESH) binding protein	-0.159387	2.53156	0.544015	0.464643	0.821656
ENSMUSG00000038827	ENSMUSG00000038827	230234	Abitram	actin binding transcription modulator	-0.0824904	1.23534	0.0445342	0.833826	0.955628
ENSMUSG00000026842	ENSMUSG00000026842	11350	Abl1	c-abl oncogene 1, non-receptor tyrosine kinase	-0.229997	3.78245	1.35833	0.250032	0.682367
ENSMUSG00000026596	ENSMUSG00000026596	11352	Abl2	v-abl Abelson murine leukemia viral oncogene 2 (arg, Abelson-related gene)	0.254724	2.97599	1.79217	0.187457	0.643058
ENSMUSG00000025085	ENSMUSG00000025085	226251	Ablim1	actin-binding LIM protein 1	0.524999	4.08261	5.58364	0.0226565	0.305075
ENSMUSG00000029095	ENSMUSG00000029095	231148	Ablim2	actin-binding LIM protein 2	0.221376	1.3891	0.576105	0.451842	0.813604
ENSMUSG00000032735	ENSMUSG00000032735	319713	Ablim3	actin binding LIM protein family, member 3	0.416816	3.88675	2.59151	0.114935	0.554874
ENSMUSG00000017631	ENSMUSG00000017631	109934	Abr	active BCR-related gene	0.235806	1.86556	0.495648	0.485084	0.829785
ENSMUSG00000042895	ENSMUSG00000042895	223513	Abra	actin-binding Rho activating protein	-0.559121	2.82814	0.491991	0.48757	0.830691
ENSMUSG00000078453	ENSMUSG00000078453	73112	Abracl	ABRA C-terminal like	0.0932313	3.0641	0.184188	0.669868	0.908042
ENSMUSG00000035234	ENSMUSG00000035234	70681	Abraxas1	BRCA1 A complex subunit	0.145884	2.52598	0.242329	0.624947	0.889462
ENSMUSG00000030965	ENSMUSG00000030965	109359	Abraxas2	BRISC complex subunit	0.111472	5.04686	0.757866	0.388666	0.780669
ENSMUSG00000036376	ENSMUSG00000036376	30946	Abt1	activator of basal transcription 1	-0.111039	2.89938	0.10225	0.750742	0.933031
ENSMUSG00000030083	ENSMUSG00000030083	80283	Abtb1	ankyrin repeat and BTB (POZ) domain containing 1	-0.0404018	3.86109	0.0599271	0.807736	0.948551
ENSMUSG00000032724	ENSMUSG00000032724	99382	Abtb2	ankyrin repeat and BTB (POZ) domain containing 2	0.168991	2.9184	0.287312	0.59471	0.874715
ENSMUSG00000036138	ENSMUSG00000036138	113868	Acaa1a	acetyl-Coenzyme A acyltransferase 1A	-0.252843	7.35271	2.5171	0.119695	0.563198
ENSMUSG00000010651	ENSMUSG00000010651	235674	Acaa1b	acetyl-Coenzyme A acyltransferase 1B	-0.260306	10.7396	2.2714	0.138843	0.586839
ENSMUSG00000036880	ENSMUSG00000036880	52538	Acaa2	acetyl-Coenzyme A acyltransferase 2 (mitochondrial 3-oxoacyl-Coenzyme A thiolase)	-0.020246	9.90409	0.0328568	0.856983	0.960751
ENSMUSG00000020532	ENSMUSG00000020532	107476	Acaca	acetyl-Coenzyme A carboxylase alpha	0.277707	5.70316	2.07037	0.157509	0.607512
ENSMUSG00000042010	ENSMUSG00000042010	100705	Acacb	acetyl-Coenzyme A carboxylase beta	0.386191	5.37678	1.5652	0.218689	0.66648
ENSMUSG00000029456	ENSMUSG00000029456	71985	Acad10	acyl-Coenzyme A dehydrogenase family, member 10	-0.0628207	3.98802	0.147452	0.70281	0.918859
ENSMUSG00000090150	ENSMUSG00000090150	102632	Acad11	acyl-Coenzyme A dehydrogenase family, member 11	-0.100552	7.05855	0.360037	0.551567	0.85583
ENSMUSG00000042647	ENSMUSG00000042647	338350	Acad12	acyl-Coenzyme A dehydrogenase family, member 12	-0.476486	3.17467	6.10715	0.0173574	0.27878
ENSMUSG00000031969	ENSMUSG00000031969	66948	Acad8	acyl-Coenzyme A dehydrogenase family, member 8	0.0577155	5.19717	0.336018	0.565059	0.860814
ENSMUSG00000027710	ENSMUSG00000027710	229211	Acad9	acyl-Coenzyme A dehydrogenase family, member 9	-0.680533	0.929988	3.20518	0.0802058	0.489218
ENSMUSG00000026003	ENSMUSG00000026003	11363	Acadl	acyl-Coenzyme A dehydrogenase, long-chain	-0.213653	7.50849	6.76629	0.012564	0.249486
ENSMUSG00000062908	ENSMUSG00000062908	11364	Acadm	acyl-Coenzyme A dehydrogenase, medium chain	-0.364203	8.27168	5.16391	0.0279405	0.336105
ENSMUSG00000029545	ENSMUSG00000029545	11409	Acads	acyl-Coenzyme A dehydrogenase, short chain	-0.0347211	7.39778	0.0476678	0.82817	0.954767
ENSMUSG00000030861	ENSMUSG00000030861	66885	Acadsb	acyl-Coenzyme A dehydrogenase, short/branched chain	0.195765	6.60266	2.09295	0.154984	0.604852
ENSMUSG00000018574	ENSMUSG00000018574	11370	Acadvl	acyl-Coenzyme A dehydrogenase, very long chain	-0.119183	8.06214	1.19006	0.281186	0.708208
ENSMUSG00000049076	ENSMUSG00000049076	78618	Acap2	ArfGAP with coiled-coil, ankyrin repeat and PH domains 2	-0.219822	3.5905	0.832881	0.366402	0.769036
ENSMUSG00000029033	ENSMUSG00000029033	140500	Acap3	ArfGAP with coiled-coil, ankyrin repeat and PH domains 3	-0.605417	1.59256	2.54534	0.117694	0.560675
ENSMUSG00000032047	ENSMUSG00000032047	110446	Acat1	acetyl-Coenzyme A acetyltransferase 1	-0.535157	8.89374	5.75683	0.0211394	0.297567
ENSMUSG00000023832	ENSMUSG00000023832	110460	Acat2	acetyl-Coenzyme A acetyltransferase 2	-0.197619	6.77803	1.38567	0.245472	0.680455
ENSMUSG00000062480	ENSMUSG00000062480	224530	Acat3	acetyl-Coenzyme A acetyltransferase 3	-0.0318867	7.56655	0.0724235	0.789083	0.942831
ENSMUSG00000026499	ENSMUSG00000026499	170760	Acbd3	acyl-Coenzyme A binding domain containing 3	0.273711	5.10949	5.82152	0.0200133	0.29474
ENSMUSG00000056938	ENSMUSG00000056938	67131	Acbd4	acyl-Coenzyme A binding domain containing 4	-0.117566	5.24512	0.689172	0.410875	0.793508
ENSMUSG00000026781	ENSMUSG00000026781	74159	Acbd5	acyl-Coenzyme A binding domain containing 5	-0.0153348	7.22541	0.0189686	0.891078	0.9698
ENSMUSG00000033701	ENSMUSG00000033701	72482	Acbd6	acyl-Coenzyme A binding domain containing 6	0.0783168	5.04696	0.470716	0.496215	0.833316
ENSMUSG00000040272	ENSMUSG00000040272	329470	Accs	1-aminocyclopropane-1-carboxylate synthase (non-functional)	-0.0795703	1.94219	0.07867	0.780407	0.940179
ENSMUSG00000038000	ENSMUSG00000038000	497652	Acd	adrenocortical dysplasia	0.194688	3.88376	1.39028	0.244619	0.679697
ENSMUSG00000038007	ENSMUSG00000038007	230379	Acer2	alkaline ceramidase 2	-0.00414872	3.30318	0.000512592	0.982038	0.996593
ENSMUSG00000030760	ENSMUSG00000030760	66190	Acer3	alkaline ceramidase 3	-0.146527	3.23232	0.552873	0.461052	0.820198
ENSMUSG00000022185	ENSMUSG00000022185	56215	Acin1	apoptotic chromatin condensation inducer 1	0.145616	6.22751	1.89068	0.176005	0.628873
ENSMUSG00000037872	ENSMUSG00000037872	13349	Ackr1	atypical chemokine receptor 1 (Duffy blood group)	-0.153942	1.00078	0.112626	0.73875	0.93022
ENSMUSG00000044534	ENSMUSG00000044534	59289	Ackr2	atypical chemokine receptor 2	-0.0518546	1.12199	0.0164232	0.898605	0.972142
ENSMUSG00000020917	ENSMUSG00000020917	104112	Acly	ATP citrate lyase	0.186773	6.19687	0.372374	0.545439	0.85328
ENSMUSG00000026348	ENSMUSG00000026348	266645	Acmsd	amino carboxymuconate semialdehyde decarboxylase	0.884803	3.56621	5.91432	0.0197428	0.294477
ENSMUSG00000070985	ENSMUSG00000070985	230161	Acnat1	acyl-coenzyme A amino acid N-acyltransferase 1	-0.641977	2.22595	5.70851	0.0211817	0.297567
ENSMUSG00000060317	ENSMUSG00000060317	209186	Acnat2	acyl-coenzyme A amino acid N-acyltransferase 2	-0.812693	4.50414	9.68701	0.00340861	0.140537
ENSMUSG00000028405	ENSMUSG00000028405	11428	Aco1	aconitase 1	-0.464959	6.23553	7.60138	0.00844845	0.209648
ENSMUSG00000022477	ENSMUSG00000022477	11429	Aco2	aconitase 2, mitochondrial	-0.0855752	7.20853	0.522662	0.473489	0.825186
ENSMUSG00000072949	ENSMUSG00000072949	26897	Acot1	acyl-CoA thioesterase 1	0.795976	5.2915	17.8698	0.000118893	0.0177696
ENSMUSG00000034853	ENSMUSG00000034853	329910	Acot11	acyl-CoA thioesterase 11	-0.822964	2.11507	7.18188	0.0102848	0.226792
ENSMUSG00000021620	ENSMUSG00000021620	74156	Acot12	acyl-CoA thioesterase 12	0.103138	6.10592	0.850547	0.361368	0.766053
ENSMUSG00000006717	ENSMUSG00000006717	66834	Acot13	acyl-CoA thioesterase 13	-0.12935	7.00223	1.08471	0.303268	0.725216
ENSMUSG00000021226	ENSMUSG00000021226	171210	Acot2	acyl-CoA thioesterase 2	-0.224829	4.97384	0.844656	0.363561	0.767569
ENSMUSG00000021228	ENSMUSG00000021228	171281	Acot3	acyl-CoA thioesterase 3	-0.00665226	5.06714	0.000180826	0.989346	0.996816
ENSMUSG00000052392	ENSMUSG00000052392	171282	Acot4	acyl-CoA thioesterase 4	-0.266981	6.21235	1.29147	0.262649	0.691312
ENSMUSG00000043487	ENSMUSG00000043487	217700	Acot6	acyl-CoA thioesterase 6	0.111811	2.16237	0.0868326	0.76963	0.938151
ENSMUSG00000028937	ENSMUSG00000028937	70025	Acot7	acyl-CoA thioesterase 7	0.0173467	4.70393	0.0183332	0.892906	0.970164
ENSMUSG00000017307	ENSMUSG00000017307	170789	Acot8	acyl-CoA thioesterase 8	0.0383744	4.7706	0.0592427	0.808815	0.948551
ENSMUSG00000025287	ENSMUSG00000025287	56360	Acot9	acyl-CoA thioesterase 9	-0.00904582	1.84854	0.000609396	0.980416	0.996549
ENSMUSG00000020777	ENSMUSG00000020777	11430	Acox1	acyl-Coenzyme A oxidase 1, palmitoyl	-0.277403	10.0914	5.56563	0.0227651	0.305075
ENSMUSG00000021751	ENSMUSG00000021751	93732	Acox2	acyl-Coenzyme A oxidase 2, branched chain	-0.141649	6.92224	1.86851	0.178507	0.630636
ENSMUSG00000029098	ENSMUSG00000029098	80911	Acox3	acyl-Coenzyme A oxidase 3, pristanoyl	-0.0817533	3.89069	0.28763	0.594413	0.874672
ENSMUSG00000044573	ENSMUSG00000044573	11431	Acp1	acid phosphatase 1, soluble	-0.0317616	6.23516	0.0956935	0.758503	0.934473
ENSMUSG00000002103	ENSMUSG00000002103	11432	Acp2	acid phosphatase 2, lysosomal	0.0580086	5.01573	0.169811	0.682257	0.91189
ENSMUSG00000001348	ENSMUSG00000001348	11433	Acp5	acid phosphatase 5, tartrate resistant	0.0362502	6.85012	0.111448	0.740069	0.930795
ENSMUSG00000028093	ENSMUSG00000028093	66659	Acp6	acid phosphatase 6, lysophosphatidic	0.00235413	4.69451	0.000276848	0.986799	0.996593
ENSMUSG00000032561	ENSMUSG00000032561	56318	Acpp	acid phosphatase, prostate	1.50167	1.5061	9.39821	0.00369179	0.148533
ENSMUSG00000072770	ENSMUSG00000072770	54137	Acrbp	proacrosin binding protein	0.479445	2.67492	3.71136	0.0604408	0.445787
ENSMUSG00000076435	ENSMUSG00000076435	264895	Acsf2	acyl-CoA synthetase family member 2	0.110199	4.23606	0.19821	0.658476	0.904732
ENSMUSG00000015016	ENSMUSG00000015016	257633	Acsf3	acyl-CoA synthetase family member 3	-0.0319341	4.0536	0.0337063	0.855166	0.959798
ENSMUSG00000018796	ENSMUSG00000018796	14081	Acsl1	acyl-CoA synthetase long-chain family member 1	0.245159	9.8209	2.61099	0.11319	0.553291
ENSMUSG00000032883	ENSMUSG00000032883	74205	Acsl3	acyl-CoA synthetase long-chain family member 3	-0.332429	4.76851	2.67984	0.108869	0.544594
ENSMUSG00000031278	ENSMUSG00000031278	50790	Acsl4	acyl-CoA synthetase long-chain family member 4	0.107924	5.4282	0.280945	0.598868	0.876544
ENSMUSG00000024981	ENSMUSG00000024981	433256	Acsl5	acyl-CoA synthetase long-chain family member 5	-0.0600732	7.73531	0.207553	0.650906	0.900938
ENSMUSG00000033533	ENSMUSG00000033533	117147	Acsm1	acyl-CoA synthetase medium-chain family member 1	0.131217	7.70668	0.90217	0.347328	0.758394
ENSMUSG00000030935	ENSMUSG00000030935	20216	Acsm3	acyl-CoA synthetase medium-chain family member 3	-0.147396	5.28255	0.857244	0.359502	0.764508
ENSMUSG00000030972	ENSMUSG00000030972	272428	Acsm5	acyl-CoA synthetase medium-chain family member 5	-0.333122	5.33856	5.27438	0.0264014	0.327165
ENSMUSG00000027605	ENSMUSG00000027605	60525	Acss2	acyl-CoA synthetase short-chain family member 2	0.254178	6.38823	0.708306	0.405396	0.790666
ENSMUSG00000035948	ENSMUSG00000035948	380660	Acss3	acyl-CoA synthetase short-chain family member 3	-0.673595	4.06564	7.50697	0.0089606	0.216199
ENSMUSG00000035783	ENSMUSG00000035783	11475	Acta2	actin, alpha 2, smooth muscle, aorta	-0.0825535	2.56115	0.0693736	0.793466	0.943997
ENSMUSG00000029580	ENSMUSG00000029580	11461	Actb	actin, beta	-0.0546943	11.0462	0.141687	0.708397	0.921042
ENSMUSG00000062825	ENSMUSG00000062825	11465	Actg1	actin, gamma, cytoplasmic 1	-0.319947	7.61363	2.27252	0.139459	0.587589
ENSMUSG00000027671	ENSMUSG00000027671	56456	Actl6a	actin-like 6A	0.132221	3.96614	0.912661	0.344567	0.755835
ENSMUSG00000015143	ENSMUSG00000015143	109711	Actn1	actinin, alpha 1	0.131691	5.57021	1.08404	0.303415	0.725281
ENSMUSG00000054808	ENSMUSG00000054808	60595	Actn4	actinin alpha 4	-0.0254262	7.41613	0.0320169	0.858802	0.961097
ENSMUSG00000021076	ENSMUSG00000021076	56444	Actr10	ARP10 actin-related protein 10	0.062949	5.40109	0.440916	0.510104	0.84152
ENSMUSG00000025228	ENSMUSG00000025228	54130	Actr1a	ARP1 actin-related protein 1A, centractin alpha	0.138003	4.65597	0.573189	0.452982	0.813641
ENSMUSG00000037351	ENSMUSG00000037351	226977	Actr1b	ARP1 actin-related protein 1B, centractin beta	-0.241358	5.46381	6.6267	0.0134459	0.255187
ENSMUSG00000020152	ENSMUSG00000020152	66713	Actr2	ARP2 actin-related protein 2	-0.107699	5.59172	0.404081	0.528243	0.847979
ENSMUSG00000026341	ENSMUSG00000026341	74117	Actr3	ARP3 actin-related protein 3	0.0619852	5.52717	0.164247	0.687216	0.913495
ENSMUSG00000037761	ENSMUSG00000037761	109275	Actr5	ARP5 actin-related protein 5	0.0141643	2.64197	0.00527089	0.942449	0.984726
ENSMUSG00000019948	ENSMUSG00000019948	67019	Actr6	ARP6 actin-related protein 6	0.382511	3.67165	5.13264	0.0283934	0.339227
ENSMUSG00000015971	ENSMUSG00000015971	56249	Actr8	ARP8 actin-related protein 8	-0.150274	4.31188	1.57025	0.216711	0.665407
ENSMUSG00000026836	ENSMUSG00000026836	11477	Acvr1	activin A receptor, type 1	-0.128572	3.65394	0.179508	0.67404	0.909203
ENSMUSG00000000532	ENSMUSG00000000532	11479	Acvr1b	activin A receptor, type 1B	-0.285915	2.84413	1.34153	0.252939	0.683943
ENSMUSG00000052155	ENSMUSG00000052155	11480	Acvr2a	activin receptor IIA	-0.159987	2.87971	0.730882	0.397174	0.786193
ENSMUSG00000061393	ENSMUSG00000061393	11481	Acvr2b	activin receptor IIB	0.495177	2.85487	4.76631	0.0343348	0.361895
ENSMUSG00000000530	ENSMUSG00000000530	11482	Acvrl1	activin A receptor, type II-like 1	0.352412	1.53181	0.749145	0.391387	0.781889
ENSMUSG00000023262	ENSMUSG00000023262	109652	Acy1	aminoacylase 1	0.120688	4.40905	0.529955	0.470437	0.824151
ENSMUSG00000024866	ENSMUSG00000024866	71670	Acy3	aspartoacylase (aminoacylase) 3	-0.261517	6.44632	3.43824	0.0703339	0.467199
ENSMUSG00000008822	ENSMUSG00000008822	66204	Acyp1	acylphosphatase 1, erythrocyte (common) type	0.447244	3.38878	1.6518	0.206149	0.659053
ENSMUSG00000027259	ENSMUSG00000027259	75894	Adal	adenosine deaminase-like	-0.20393	2.90581	0.62395	0.43377	0.808022
ENSMUSG00000054693	ENSMUSG00000054693	11487	Adam10	a disintegrin and metallopeptidase domain 10	-0.203086	4.04613	1.27802	0.26432	0.692224
ENSMUSG00000020926	ENSMUSG00000020926	11488	Adam11	a disintegrin and metallopeptidase domain 11	1.7383	1.43769	15.7937	0.000255615	0.0298986
ENSMUSG00000028041	ENSMUSG00000028041	11490	Adam15	a disintegrin and metallopeptidase domain 15 (metargidin)	-0.332284	1.56641	0.633886	0.430158	0.805435
ENSMUSG00000052593	ENSMUSG00000052593	11491	Adam17	a disintegrin and metallopeptidase domain 17	0.135532	3.49608	0.658908	0.421264	0.7985
ENSMUSG00000011256	ENSMUSG00000011256	11492	Adam19	a disintegrin and metallopeptidase domain 19 (meltrin beta)	0.0918376	1.33215	0.0546829	0.816178	0.951329
ENSMUSG00000025964	ENSMUSG00000025964	23792	Adam23	a disintegrin and metallopeptidase domain 23	0.0715477	3.31056	0.167021	0.684732	0.912527
ENSMUSG00000031555	ENSMUSG00000031555	11502	Adam9	a disintegrin and metallopeptidase domain 9 (meltrin gamma)	-0.586487	3.36327	0.872517	0.356492	0.763419
ENSMUSG00000022893	ENSMUSG00000022893	11504	Adamts1	a disintegrin-like and metallopeptidase (reprolysin type) with thrombospondin type 1 motif, 1	-0.413589	3.37623	3.30118	0.0759641	0.478036
ENSMUSG00000024299	ENSMUSG00000024299	224697	Adamts10	a disintegrin-like and metallopeptidase (reprolysin type) with thrombospondin type 1 motif, 10	0.0153705	2.53248	0.00370706	0.951723	0.987855
ENSMUSG00000014852	ENSMUSG00000014852	279028	Adamts13	a disintegrin-like and metallopeptidase (reprolysin type) with thrombospondin type 1 motif, 13	0.252295	2.28006	0.850351	0.361423	0.766053
ENSMUSG00000036545	ENSMUSG00000036545	216725	Adamts2	a disintegrin-like and metallopeptidase (reprolysin type) with thrombospondin type 1 motif, 2	0.46236	2.44331	1.65366	0.205341	0.658736
ENSMUSG00000022894	ENSMUSG00000022894	23794	Adamts5	a disintegrin-like and metallopeptidase (reprolysin type) with thrombospondin type 1 motif, 5 (aggrecanase-2)	0.685085	1.79097	2.68673	0.108234	0.544332
ENSMUSG00000032363	ENSMUSG00000032363	108153	Adamts7	a disintegrin-like and metallopeptidase (reprolysin type) with thrombospondin type 1 motif, 7	-0.211428	1.74976	0.350605	0.556766	0.856338
ENSMUSG00000030022	ENSMUSG00000030022	101401	Adamts9	a disintegrin-like and metallopeptidase (reprolysin type) with thrombospondin type 1 motif, 9	-0.0940352	1.12667	0.0524158	0.81996	0.951652
ENSMUSG00000066113	ENSMUSG00000066113	77739	Adamtsl1	ADAMTS-like 1	0.162189	1.3862	0.100269	0.753035	0.933345
ENSMUSG00000036040	ENSMUSG00000036040	77794	Adamtsl2	ADAMTS-like 2	0.887596	2.80774	4.20434	0.0470963	0.400859
ENSMUSG00000015850	ENSMUSG00000015850	229595	Adamtsl4	ADAMTS-like 4	0.695613	1.09719	3.35569	0.073667	0.474973
ENSMUSG00000020709	ENSMUSG00000020709	216991	Adap2	ArfGAP with dual PH domains 2	0.205162	4.29033	0.457062	0.503016	0.83903
ENSMUSG00000027951	ENSMUSG00000027951	56417	Adar	adenosine deaminase, RNA-specific	0.489488	3.79684	11.9938	0.00119111	0.0766453
ENSMUSG00000020262	ENSMUSG00000020262	110532	Adarb1	adenosine deaminase, RNA-specific, B1	0.106276	2.56033	0.14721	0.703042	0.918859
ENSMUSG00000031949	ENSMUSG00000031949	30947	Adat1	adenosine deaminase, tRNA-specific 1	0.14654	1.52802	0.189424	0.665499	0.906428
ENSMUSG00000019808	ENSMUSG00000019808	66757	Adat2	adenosine deaminase, tRNA-specific 2	-0.522284	1.16653	1.60969	0.211128	0.664119
ENSMUSG00000021044	ENSMUSG00000021044	72113	Adck1	aarF domain containing kinase 1	0.0704734	3.37271	0.144388	0.705764	0.919792
ENSMUSG00000046947	ENSMUSG00000046947	57869	Adck2	aarF domain containing kinase 2	0.507288	2.82775	3.81668	0.0570446	0.434725
ENSMUSG00000022550	ENSMUSG00000022550	268822	Adck5	aarF domain containing kinase 5	0.256935	4.09356	2.31521	0.135184	0.584803
ENSMUSG00000022220	ENSMUSG00000022220	104110	Adcy4	adenylate cyclase 4	0.0595277	2.15734	0.0548077	0.815972	0.951329
ENSMUSG00000022994	ENSMUSG00000022994	11512	Adcy6	adenylate cyclase 6	-0.24133	3.7451	1.52188	0.223807	0.66799
ENSMUSG00000031659	ENSMUSG00000031659	11513	Adcy7	adenylate cyclase 7	0.221467	1.46759	0.31482	0.57755	0.86735
ENSMUSG00000005580	ENSMUSG00000005580	11515	Adcy9	adenylate cyclase 9	0.0805185	4.37581	0.198084	0.658428	0.904732
ENSMUSG00000029778	ENSMUSG00000029778	11517	Adcyap1r1	adenylate cyclase activating polypeptide 1 receptor 1	0.244967	1.28157	0.284898	0.596163	0.874738
ENSMUSG00000029106	ENSMUSG00000029106	11518	Add1	adducin 1 (alpha)	-0.101752	4.91514	0.695817	0.408646	0.791601
ENSMUSG00000025026	ENSMUSG00000025026	27360	Add3	adducin 3 (gamma)	0.315104	4.00735	3.15308	0.082618	0.492389
ENSMUSG00000029090	ENSMUSG00000029090	70693	Adgra3	adhesion G protein-coupled receptor A3	-0.480187	4.14684	4.71464	0.0353935	0.362387
ENSMUSG00000004730	ENSMUSG00000004730	13733	Adgre1	adhesion G protein-coupled receptor E1	-0.133331	3.79378	0.321595	0.57355	0.866079
ENSMUSG00000032915	ENSMUSG00000032915	52614	Adgre4	adhesion G protein-coupled receptor E4	-0.167507	1.23925	0.106762	0.745404	0.932214
ENSMUSG00000002885	ENSMUSG00000002885	26364	Adgre5	adhesion G protein-coupled receptor E5	-0.169975	4.06724	0.932417	0.339451	0.752977
ENSMUSG00000056492	ENSMUSG00000056492	224792	Adgrf5	adhesion G protein-coupled receptor F5	0.0917207	4.71231	0.351907	0.556037	0.856055
ENSMUSG00000031785	ENSMUSG00000031785	14766	Adgrg1	adhesion G protein-coupled receptor G1	0.529701	1.17194	1.65085	0.205487	0.658736
ENSMUSG00000031298	ENSMUSG00000031298	237175	Adgrg2	adhesion G protein-coupled receptor G2	-0.726082	1.93065	5.29946	0.0260648	0.324634
ENSMUSG00000060470	ENSMUSG00000060470	54672	Adgrg3	adhesion G protein-coupled receptor G3	-0.243353	2.4462	1.11326	0.297065	0.72029
ENSMUSG00000013033	ENSMUSG00000013033	330814	Adgrl1	adhesion G protein-coupled receptor L1	0.308358	3.20964	1.91764	0.173017	0.625195
ENSMUSG00000028184	ENSMUSG00000028184	99633	Adgrl2	adhesion G protein-coupled receptor L2	0.236918	4.48859	2.86176	0.0976965	0.524472
ENSMUSG00000039167	ENSMUSG00000039167	170757	Adgrl4	adhesion G protein-coupled receptor L4	0.029378	3.63949	0.0313077	0.860358	0.961558
ENSMUSG00000069170	ENSMUSG00000069170	110789	Adgrv1	adhesion G protein-coupled receptor V1	-1.40099	2.91216	19.0414	7.8055e-05	0.0129223
ENSMUSG00000074207	ENSMUSG00000074207	11522	Adh1	alcohol dehydrogenase 1 (class I)	-0.0709889	11.06	0.30683	0.582403	0.869604
ENSMUSG00000037797	ENSMUSG00000037797	26876	Adh4	alcohol dehydrogenase 4 (class II), pi polypeptide	-0.00363995	5.79033	0.000708876	0.978878	0.996141
ENSMUSG00000028138	ENSMUSG00000028138	11532	Adh5	alcohol dehydrogenase 5 (class III), chi polypeptide	-0.149961	7.80094	1.44798	0.235211	0.674612
ENSMUSG00000055301	ENSMUSG00000055301	11529	Adh7	alcohol dehydrogenase 7 (class IV), mu or sigma polypeptide	0.187053	1.78037	0.469946	0.496566	0.833321
ENSMUSG00000025911	ENSMUSG00000025911	76187	Adhfe1	alcohol dehydrogenase, iron containing, 1	-0.393628	5.70178	2.73559	0.106009	0.540133
ENSMUSG00000020629	ENSMUSG00000020629	104923	Adi1	acireductone dioxygenase 1	0.0776763	6.25205	0.338164	0.563823	0.859856
ENSMUSG00000026457	ENSMUSG00000026457	72674	Adipor1	adiponectin receptor 1	0.0576528	5.44289	0.25528	0.615873	0.885575
ENSMUSG00000030168	ENSMUSG00000030168	68465	Adipor2	adiponectin receptor 2	-0.00988171	8.42789	0.00790051	0.929572	0.980035
ENSMUSG00000039197	ENSMUSG00000039197	11534	Adk	adenosine kinase	-0.0643809	9.245	0.429747	0.515486	0.844314
ENSMUSG00000030790	ENSMUSG00000030790	11535	Adm	adrenomedullin	0.167368	0.800841	0.142033	0.708058	0.921042
ENSMUSG00000053950	ENSMUSG00000053950	240442	Adnp2	ADNP homeobox 2	-0.078752	1.06592	0.02893	0.865711	0.963383
ENSMUSG00000057134	ENSMUSG00000057134	211488	Ado	2-aminoethanethiol (cysteamine) dioxygenase	-0.12388	3.91835	0.95375	0.334043	0.748521
ENSMUSG00000042429	ENSMUSG00000042429	11539	Adora1	adenosine A1 receptor	-0.437339	5.70757	8.98634	0.00443712	0.160228
ENSMUSG00000025236	ENSMUSG00000025236	72141	Adpgk	ADP-dependent glucokinase	0.0902522	2.93839	0.101611	0.751395	0.933152
ENSMUSG00000002844	ENSMUSG00000002844	11544	Adprh	ADP-ribosylarginine hydrolase	-0.00979511	2.98473	0.00216293	0.963114	0.99185
ENSMUSG00000042558	ENSMUSG00000042558	100206	Adprhl2	ADP-ribosylhydrolase like 2	-0.0338938	3.3266	0.0247071	0.87581	0.966235
ENSMUSG00000020910	ENSMUSG00000020910	66358	Adprm	ADP-ribose/CDP-alcohol diphosphatase, manganese dependent	-0.0941394	3.68243	0.306538	0.582582	0.869647
ENSMUSG00000045875	ENSMUSG00000045875	11549	Adra1a	adrenergic receptor, alpha 1a	-0.0189913	2.6282	0.00838357	0.927457	0.979812
ENSMUSG00000050541	ENSMUSG00000050541	11548	Adra1b	adrenergic receptor, alpha 1b	0.0128175	6.0708	0.00974146	0.92182	0.977879
ENSMUSG00000058620	ENSMUSG00000058620	11552	Adra2b	adrenergic receptor, alpha 2b	-0.12001	2.17855	0.166544	0.685157	0.91261
ENSMUSG00000035283	ENSMUSG00000035283	11554	Adrb1	adrenergic receptor, beta 1	0.232558	1.37353	0.285105	0.59603	0.874738
ENSMUSG00000031489	ENSMUSG00000031489	11556	Adrb3	adrenergic receptor, beta 3	0.587038	2.74355	4.00935	0.0513615	0.415731
ENSMUSG00000039041	ENSMUSG00000039041	56436	Adrm1	adhesion regulating molecule 1	0.138169	6.345	0.777476	0.382649	0.779576
ENSMUSG00000022407	ENSMUSG00000022407	11564	Adsl	adenylosuccinate lyase	0.110933	2.40849	0.22989	0.633952	0.89316
ENSMUSG00000015961	ENSMUSG00000015961	11566	Adss	adenylosuccinate synthetase, non muscle	-0.0811163	5.01541	0.480612	0.491746	0.832098
ENSMUSG00000011148	ENSMUSG00000011148	11565	Adssl1	adenylosuccinate synthetase like 1	0.0170759	3.12975	0.00565558	0.94039	0.984293
ENSMUSG00000058022	ENSMUSG00000058022	109254	Adtrp	androgen dependent TFPI regulating protein	-0.0173477	6.91032	0.0200161	0.88813	0.969073
ENSMUSG00000030232	ENSMUSG00000030232	11569	Aebp2	AE binding protein 2	-0.125525	4.43891	0.621295	0.434743	0.808549
ENSMUSG00000030609	ENSMUSG00000030609	68048	Aen	apoptosis enhancing nuclease	-0.294492	3.81978	1.72382	0.195931	0.649308
ENSMUSG00000029094	ENSMUSG00000029094	70292	Afap1	actin filament associated protein 1	0.190646	1.32045	0.204788	0.653081	0.902357
ENSMUSG00000033032	ENSMUSG00000033032	106877	Afap1l1	actin filament associated protein 1-like 1	0.0140148	1.35924	0.00187247	0.965678	0.992089
ENSMUSG00000068036	ENSMUSG00000068036	17356	Afdn	afadin, adherens junction formation factor	-0.0157592	5.61131	0.0292449	0.86499	0.963175
ENSMUSG00000029313	ENSMUSG00000029313	17355	Aff1	AF4/FMR2 family, member 1	-0.100379	3.98549	0.419466	0.520529	0.845771
ENSMUSG00000049470	ENSMUSG00000049470	93736	Aff4	AF4/FMR2 family, member 4	-0.0184563	5.12012	0.0374873	0.847357	0.957357
ENSMUSG00000038302	ENSMUSG00000038302	215951	Afg1l	AFG1 like ATPase	0.224726	2.31721	0.725086	0.399037	0.78705
ENSMUSG00000031967	ENSMUSG00000031967	114896	Afg3l1	AFG3-like AAA ATPase 1	-0.00349665	5.93999	0.000911411	0.976051	0.995229
ENSMUSG00000024527	ENSMUSG00000024527	69597	Afg3l2	AFG3-like AAA ATPase 2	-0.194305	5.20364	1.42462	0.238964	0.677244
ENSMUSG00000029369	ENSMUSG00000029369	280662	Afm	afamin	0.0618936	7.32298	0.247413	0.62135	0.887725
ENSMUSG00000017718	ENSMUSG00000017718	71562	Afmid	arylformamidase	0.0943384	1.60041	0.0806055	0.777795	0.940066
ENSMUSG00000049659	ENSMUSG00000049659	216549	Aftph	aftiphilin	-0.0704031	5.21744	0.298461	0.587576	0.871187
ENSMUSG00000031521	ENSMUSG00000031521	11593	Aga	aspartylglucosaminidase	-0.47766	4.94576	8.73636	0.00497245	0.170239
ENSMUSG00000055013	ENSMUSG00000055013	347722	Agap1	ArfGAP with GTPase domain, ankyrin repeat and PH domain 1	0.120869	3.60551	0.902131	0.347338	0.758394
ENSMUSG00000023353	ENSMUSG00000023353	213990	Agap3	ArfGAP with GTPase domain, ankyrin repeat and PH domain 3	0.159286	3.78085	0.576096	0.451846	0.813604
ENSMUSG00000038836	ENSMUSG00000038836	76223	Agbl3	ATP/GTP binding protein-like 3	-0.0910694	1.8573	0.0783037	0.780905	0.940179
ENSMUSG00000029165	ENSMUSG00000029165	231093	Agbl5	ATP/GTP binding protein-like 5	0.380828	1.23791	1.19453	0.280295	0.708023
ENSMUSG00000026159	ENSMUSG00000026159	15463	Agfg1	ArfGAP with FG repeats 1	-0.152929	4.13758	0.908138	0.345754	0.757154
ENSMUSG00000029722	ENSMUSG00000029722	231801	Agfg2	ArfGAP with FG repeats 2	0.31338	6.45585	4.07167	0.0496583	0.408466
ENSMUSG00000021681	ENSMUSG00000021681	66549	Aggf1	angiogenic factor with G patch and FHA domains 1	-0.132119	4.8446	0.756098	0.389216	0.780669
ENSMUSG00000029916	ENSMUSG00000029916	69923	Agk	acylglycerol kinase	-0.604881	1.88761	4.47839	0.0399508	0.373836
ENSMUSG00000033400	ENSMUSG00000033400	77559	Agl	amylo-1,6-glucosidase, 4-alpha-glucanotransferase	-0.143041	5.54	1.91431	0.173383	0.625296
ENSMUSG00000040706	ENSMUSG00000040706	75986	Agmat	agmatine ureohydrolase (agmatinase)	-0.0977223	7.34132	0.445024	0.50815	0.840558
ENSMUSG00000050103	ENSMUSG00000050103	319660	Agmo	alkylglycerol monooxygenase	-0.625835	5.42066	15.1597	0.000327717	0.0362831
ENSMUSG00000041530	ENSMUSG00000041530	236511	Ago1	argonaute RISC catalytic subunit 1	-0.0523136	3.5311	0.110238	0.741431	0.930918
ENSMUSG00000036698	ENSMUSG00000036698	239528	Ago2	argonaute RISC catalytic subunit 2	0.0019415	5.04828	0.000364436	0.984854	0.996593
ENSMUSG00000028842	ENSMUSG00000028842	214150	Ago3	argonaute RISC catalytic subunit 3	-0.174478	3.13554	0.858791	0.359073	0.764508
ENSMUSG00000042500	ENSMUSG00000042500	76850	Ago4	argonaute RISC catalytic subunit 4	0.22599	1.92467	0.463296	0.499612	0.835696
ENSMUSG00000034254	ENSMUSG00000034254	55979	Agpat1	1-acylglycerol-3-phosphate O-acyltransferase 1 (lysophosphatidic acid acyltransferase, alpha)	0.244725	2.3266	1.37513	0.247168	0.681678
ENSMUSG00000026922	ENSMUSG00000026922	67512	Agpat2	1-acylglycerol-3-phosphate O-acyltransferase 2 (lysophosphatidic acid acyltransferase, beta)	0.173646	7.36258	2.27287	0.138719	0.586544
ENSMUSG00000001211	ENSMUSG00000001211	28169	Agpat3	1-acylglycerol-3-phosphate O-acyltransferase 3	-0.0364735	6.74649	0.117984	0.732848	0.928286
ENSMUSG00000023827	ENSMUSG00000023827	68262	Agpat4	1-acylglycerol-3-phosphate O-acyltransferase 4 (lysophosphatidic acid acyltransferase, delta)	-0.230432	0.919172	0.382486	0.539427	0.85258
ENSMUSG00000031467	ENSMUSG00000031467	52123	Agpat5	1-acylglycerol-3-phosphate O-acyltransferase 5 (lysophosphatidic acid acyltransferase, epsilon)	-0.0439951	3.49973	0.0808405	0.77748	0.940066
ENSMUSG00000042410	ENSMUSG00000042410	228061	Agps	alkylglycerone phosphate synthase	0.0969973	2.73985	0.135491	0.71455	0.922528
ENSMUSG00000041936	ENSMUSG00000041936	11603	Agrn	agrin	0.257503	4.36011	2.80236	0.101137	0.530607
ENSMUSG00000031980	ENSMUSG00000031980	11606	Agt	angiotensinogen (serpin peptidase inhibitor, clade A, member 8)	-0.210832	8.83921	4.36794	0.0423639	0.38601
ENSMUSG00000021557	ENSMUSG00000021557	67269	Agtpbp1	ATP/GTP binding protein 1	-0.376357	3.75536	5.76695	0.0205686	0.29474
ENSMUSG00000049115	ENSMUSG00000049115	11607	Agtr1a	angiotensin II receptor, type 1a	0.272188	5.21547	3.28277	0.076758	0.478837
ENSMUSG00000029007	ENSMUSG00000029007	11610	Agtrap	angiotensin II, type I receptor-associated protein	0.0751337	2.14453	0.0813836	0.776754	0.940066
ENSMUSG00000026272	ENSMUSG00000026272	11611	Agxt	alanine-glyoxylate aminotransferase	0.304975	6.79517	3.08249	0.0861756	0.500363
ENSMUSG00000089678	ENSMUSG00000089678	268782	Agxt2	alanine-glyoxylate aminotransferase 2	-0.433652	7.40857	21.1792	3.47542e-05	0.00779146
ENSMUSG00000026491	ENSMUSG00000026491	226747	Ahctf1	AT hook containing transcription factor 1	-0.155409	3.82232	1.09632	0.300725	0.72288
ENSMUSG00000027597	ENSMUSG00000027597	269378	Ahcy	S-adenosylhomocysteine hydrolase	0.0738681	9.61806	0.224665	0.637824	0.8951
ENSMUSG00000027893	ENSMUSG00000027893	229709	Ahcyl1	S-adenosylhomocysteine hydrolase-like 1	-0.113659	6.15806	0.868123	0.3565	0.763419
ENSMUSG00000029772	ENSMUSG00000029772	74340	Ahcyl2	S-adenosylhomocysteine hydrolase-like 2	-0.411212	3.1785	4.24259	0.0452966	0.393319
ENSMUSG00000037692	ENSMUSG00000037692	230793	Ahdc1	AT hook, DNA binding motif, containing 1	0.190684	3.71465	1.45112	0.234712	0.674612
ENSMUSG00000019986	ENSMUSG00000019986	52906	Ahi1	Abelson helper integration site 1	0.130291	1.02089	0.0952644	0.759028	0.934473
ENSMUSG00000069833	ENSMUSG00000069833	66395	Ahnak	AHNAK nucleoprotein (desmoyokin)	0.271601	4.74162	2.51458	0.119875	0.563388
ENSMUSG00000019256	ENSMUSG00000019256	11622	Ahr	aryl-hydrocarbon receptor	-0.169478	4.63391	1.02638	0.316483	0.73415
ENSMUSG00000021037	ENSMUSG00000021037	217737	Ahsa1	AHA1, activator of heat shock protein ATPase 1	0.053598	6.57391	0.225021	0.637559	0.895077
ENSMUSG00000020288	ENSMUSG00000020288	268390	Ahsa2	AHA1, activator of heat shock protein ATPase 2	-0.132081	4.11098	0.600689	0.442412	0.810722
ENSMUSG00000022868	ENSMUSG00000022868	11625	Ahsg	alpha-2-HS-glycoprotein	0.314718	12.9401	6.90819	0.0117304	0.243004
ENSMUSG00000035875	ENSMUSG00000035875	98870	AI182371	expressed sequence AI182371	0.231747	7.33919	1.63168	0.208366	0.660206
ENSMUSG00000062753	ENSMUSG00000062753	106672	AI413582	expressed sequence AI413582	-0.176745	3.09268	0.724393	0.399261	0.78705
ENSMUSG00000112388	ENSMUSG00000112388	100504549	AI463170	expressed sequence AI463170	0.312155	1.39099	0.739001	0.394586	0.783875
ENSMUSG00000105987	ENSMUSG00000105987	433855	AI506816	expressed sequence AI506816	0.120976	1.57205	0.0596578	0.808207	0.948551
ENSMUSG00000010290	ENSMUSG00000010290	98404	AI597479	expressed sequence AI597479	-0.631324	2.65435	7.49002	0.00888113	0.215733
ENSMUSG00000034382	ENSMUSG00000034382	224833	AI661453	expressed sequence AI661453	0.483657	3.468	8.09599	0.00668138	0.189705
ENSMUSG00000087107	ENSMUSG00000087107	100043636	AI662270	expressed sequence AI662270	-0.135781	1.17666	0.132611	0.717463	0.923174
ENSMUSG00000047423	ENSMUSG00000047423	107242	AI837181	expressed sequence AI837181	0.0593559	4.50774	0.149718	0.700648	0.918401
ENSMUSG00000056383	ENSMUSG00000056383	233168	AI987944	expressed sequence AI987944	-0.0541831	5.00076	0.217825	0.642978	0.897529
ENSMUSG00000042901	ENSMUSG00000042901	108909	Aida	axin interactor, dorsalization associated	-0.395982	3.20414	3.08888	0.0857025	0.498241
ENSMUSG00000024397	ENSMUSG00000024397	11629	Aif1	allograft inflammatory factor 1	0.501307	3.35231	2.75567	0.104411	0.535544
ENSMUSG00000036932	ENSMUSG00000036932	26926	Aifm1	apoptosis-inducing factor, mitochondrion-associated 1	-0.203361	6.11308	3.65941	0.0621974	0.449506
ENSMUSG00000020085	ENSMUSG00000020085	71361	Aifm2	apoptosis-inducing factor, mitochondrion-associated 2	0.451905	4.41155	5.78553	0.0203777	0.29474
ENSMUSG00000022763	ENSMUSG00000022763	72168	Aifm3	apoptosis-inducing factor, mitochondrion-associated 3	0.736591	1.73683	7.07415	0.0108298	0.233545
ENSMUSG00000019806	ENSMUSG00000019806	66253	Aig1	androgen-induced 1	0.0441811	4.17329	0.0919144	0.763169	0.935713
ENSMUSG00000028029	ENSMUSG00000028029	13722	Aimp1	aminoacyl tRNA synthetase complex-interacting multifunctional protein 1	0.184403	5.51833	2.72821	0.105626	0.538691
ENSMUSG00000029610	ENSMUSG00000029610	231872	Aimp2	aminoacyl tRNA synthetase complex-interacting multifunctional protein 2	0.318149	3.54149	3.24388	0.0784651	0.48382
ENSMUSG00000024847	ENSMUSG00000024847	11632	Aip	aryl-hydrocarbon receptor-interacting protein	0.0332596	3.81535	0.0304712	0.862217	0.962486
ENSMUSG00000078247	ENSMUSG00000078247	104103	Airn	antisense Igf2r RNA	-0.17653	1.93542	0.385302	0.537944	0.851877
ENSMUSG00000022178	ENSMUSG00000022178	16475	Ajuba	ajuba LIM protein	0.750185	2.28504	4.60094	0.0374472	0.367194
ENSMUSG00000028792	ENSMUSG00000028792	11637	Ak2	adenylate kinase 2	0.0599754	7.8689	0.195627	0.660415	0.905777
ENSMUSG00000024782	ENSMUSG00000024782	56248	Ak3	adenylate kinase 3	0.203711	7.60318	1.42737	0.238618	0.677024
ENSMUSG00000028527	ENSMUSG00000028527	11639	Ak4	adenylate kinase 4	-0.0434551	5.59676	0.0811396	0.77708	0.940066
ENSMUSG00000018428	ENSMUSG00000018428	11640	Akap1	A kinase (PRKA) anchor protein 1	0.0927996	6.3568	0.49404	0.485789	0.830046
ENSMUSG00000047804	ENSMUSG00000047804	56697	Akap10	A kinase (PRKA) anchor protein 10	0.2854	2.12707	2.06262	0.157939	0.607891
ENSMUSG00000022016	ENSMUSG00000022016	219181	Akap11	A kinase (PRKA) anchor protein 11	0.0502639	4.71367	0.135266	0.714776	0.922709
ENSMUSG00000038587	ENSMUSG00000038587	83397	Akap12	A kinase (PRKA) anchor protein (gravin) 12	-0.296261	2.45564	1.3762	0.246987	0.681495
ENSMUSG00000066406	ENSMUSG00000066406	75547	Akap13	A kinase (PRKA) anchor protein 13	0.198425	6.21799	2.28844	0.137407	0.584803
ENSMUSG00000059708	ENSMUSG00000059708	338351	Akap17b	A kinase (PRKA) anchor protein 17B	0.167908	2.78949	0.484034	0.490216	0.831734
ENSMUSG00000039166	ENSMUSG00000039166	432442	Akap7	A kinase (PRKA) anchor protein 7	0.102867	3.95875	0.335986	0.565077	0.860814
ENSMUSG00000024045	ENSMUSG00000024045	56399	Akap8	A kinase (PRKA) anchor protein 8	0.12949	4.03673	0.70251	0.406418	0.791291
ENSMUSG00000002625	ENSMUSG00000002625	54194	Akap8l	A kinase (PRKA) anchor protein 8-like	0.393211	4.52337	2.95954	0.0927169	0.512443
ENSMUSG00000040407	ENSMUSG00000040407	100986	Akap9	A kinase (PRKA) anchor protein (yotiao) 9	0.237291	6.56872	5.17119	0.027836	0.336105
ENSMUSG00000031023	ENSMUSG00000031023	57373	Akip1	A kinase (PRKA) interacting protein 1	-0.0516845	4.35849	0.110507	0.741127	0.930918
ENSMUSG00000023075	ENSMUSG00000023075	68050	Akirin1	akirin 1	-0.0254927	4.13235	0.0330046	0.856665	0.960751
ENSMUSG00000028291	ENSMUSG00000028291	433693	Akirin2	akirin 2	-0.182291	4.31565	1.34322	0.252645	0.683781
ENSMUSG00000028692	ENSMUSG00000028692	58810	Akr1a1	aldo-keto reductase family 1, member A1 (aldehyde reductase)	-0.298035	8.6785	8.54307	0.00543315	0.178251
ENSMUSG00000061758	ENSMUSG00000061758	67861	Akr1b10	aldo-keto reductase family 1, member B10 (aldose reductase)	-0.110695	1.22286	0.0778931	0.781465	0.940316
ENSMUSG00000001642	ENSMUSG00000001642	11677	Akr1b3	aldo-keto reductase family 1, member B3 (aldose reductase)	0.337616	3.27882	2.24825	0.140823	0.587817
ENSMUSG00000029762	ENSMUSG00000029762	14187	Akr1b8	aldo-keto reductase family 1, member B8	0.469827	1.12758	1.47638	0.230745	0.671018
ENSMUSG00000021211	ENSMUSG00000021211	622402	Akr1c12	aldo-keto reductase family 1, member C12	-0.4859	5.50179	3.6612	0.0630288	0.449706
ENSMUSG00000021213	ENSMUSG00000021213	27384	Akr1c13	aldo-keto reductase family 1, member C13	-0.479431	6.60304	6.80105	0.0125047	0.249486
ENSMUSG00000033715	ENSMUSG00000033715	105387	Akr1c14	aldo-keto reductase family 1, member C14	-0.501213	5.87985	4.32264	0.044162	0.391414
ENSMUSG00000071551	ENSMUSG00000071551	432720	Akr1c19	aldo-keto reductase family 1, member C19	-0.620564	5.65273	14.7228	0.000389625	0.0395543
ENSMUSG00000054757	ENSMUSG00000054757	116852	Akr1c20	aldo-keto reductase family 1, member C20	-0.669655	5.9474	11.8253	0.00132672	0.0825253
ENSMUSG00000021210	ENSMUSG00000021210	83702	Akr1c6	aldo-keto reductase family 1, member C6	-0.294002	9.61532	3.06807	0.0867299	0.501235
ENSMUSG00000038641	ENSMUSG00000038641	208665	Akr1d1	aldo-keto reductase family 1, member D1	-0.344505	5.9106	2.35793	0.132473	0.582485
ENSMUSG00000045410	ENSMUSG00000045410	56043	Akr1e1	aldo-keto reductase family 1, member E1	-0.225203	5.01654	2.44	0.125356	0.57303
ENSMUSG00000028743	ENSMUSG00000028743	110198	Akr7a5	aldo-keto reductase family 7, member A5 (aflatoxin aldehyde reductase)	0.0781179	7.90477	0.404074	0.528246	0.847979
ENSMUSG00000001729	ENSMUSG00000001729	11651	Akt1	thymoma viral proto-oncogene 1	0.104426	5.2227	0.478663	0.49262	0.832098
ENSMUSG00000011096	ENSMUSG00000011096	67605	Akt1s1	AKT1 substrate 1 (proline-rich)	0.197496	2.75994	0.93384	0.339086	0.752973
ENSMUSG00000004056	ENSMUSG00000004056	11652	Akt2	thymoma viral proto-oncogene 2	0.133843	6.2297	1.65937	0.204343	0.657576
ENSMUSG00000019699	ENSMUSG00000019699	23797	Akt3	thymoma viral proto-oncogene 3	0.329234	1.38728	1.0334	0.314854	0.733536
ENSMUSG00000031667	ENSMUSG00000031667	14339	Aktip	thymoma viral proto-oncogene 1 interacting protein	-0.18271	3.04926	1.37994	0.246355	0.680797
ENSMUSG00000028393	ENSMUSG00000028393	17025	Alad	aminolevulinate, delta-, dehydratase	-0.109416	6.56886	0.55512	0.460148	0.819293
ENSMUSG00000032786	ENSMUSG00000032786	11655	Alas1	aminolevulinic acid synthase 1	0.152844	7.87437	0.099157	0.75467	0.933345
ENSMUSG00000025270	ENSMUSG00000025270	11656	Alas2	aminolevulinic acid synthase 2, erythroid	-0.0650985	5.94412	0.165889	0.685743	0.912734
ENSMUSG00000029368	ENSMUSG00000029368	11657	Alb	albumin	-0.199373	15.5481	0.975772	0.328582	0.744275
ENSMUSG00000022636	ENSMUSG00000022636	11658	Alcam	activated leukocyte cell adhesion molecule	0.330022	6.29148	3.48208	0.0688094	0.462208
ENSMUSG00000007833	ENSMUSG00000007833	69748	Aldh16a1	aldehyde dehydrogenase 16 family, member A1	0.163509	5.28961	1.88765	0.176344	0.628961
ENSMUSG00000053279	ENSMUSG00000053279	11668	Aldh1a1	aldehyde dehydrogenase family 1, subfamily A1	-0.54507	10.1064	13.538	0.000627871	0.0530068
ENSMUSG00000024747	ENSMUSG00000024747	26358	Aldh1a7	aldehyde dehydrogenase family 1, subfamily A7	-0.243293	7.54881	3.31054	0.0755642	0.477046
ENSMUSG00000035561	ENSMUSG00000035561	72535	Aldh1b1	aldehyde dehydrogenase 1 family, member B1	-0.0270308	6.33191	0.0117807	0.914132	0.9767
ENSMUSG00000030088	ENSMUSG00000030088	107747	Aldh1l1	aldehyde dehydrogenase 1 family, member L1	0.0627082	8.17367	0.244488	0.623414	0.888588
ENSMUSG00000029455	ENSMUSG00000029455	11669	Aldh2	aldehyde dehydrogenase 2, mitochondrial	0.150607	10.5302	0.761653	0.387494	0.780669
ENSMUSG00000010025	ENSMUSG00000010025	11671	Aldh3a2	aldehyde dehydrogenase family 3, subfamily A2	-1.09747	8.21852	29.9097	2.34421e-06	0.00109679
ENSMUSG00000028737	ENSMUSG00000028737	212647	Aldh4a1	aldehyde dehydrogenase 4 family, member A1	0.0824602	8.11112	0.351571	0.556225	0.856055
ENSMUSG00000035936	ENSMUSG00000035936	214579	Aldh5a1	aldhehyde dehydrogenase family 5, subfamily A1	-0.159634	5.36619	2.49177	0.121522	0.566838
ENSMUSG00000021238	ENSMUSG00000021238	104776	Aldh6a1	aldehyde dehydrogenase family 6, subfamily A1	-0.364576	7.3608	2.40599	0.128902	0.579075
ENSMUSG00000053644	ENSMUSG00000053644	110695	Aldh7a1	aldehyde dehydrogenase family 7, member A1	-0.14111	8.23132	1.81537	0.184682	0.639433
ENSMUSG00000037542	ENSMUSG00000037542	237320	Aldh8a1	aldehyde dehydrogenase 8 family, member A1	-0.208634	7.9249	2.93248	0.0937709	0.51562
ENSMUSG00000026687	ENSMUSG00000026687	56752	Aldh9a1	aldehyde dehydrogenase 9, subfamily A1	-0.173957	7.01239	2.96974	0.0917742	0.509064
ENSMUSG00000030695	ENSMUSG00000030695	11674	Aldoa	aldolase A, fructose-bisphosphate	0.355572	6.24131	7.52107	0.00875148	0.214033
ENSMUSG00000028307	ENSMUSG00000028307	230163	Aldob	aldolase B, fructose-bisphosphate	-0.351713	11.6392	7.39021	0.00931203	0.220235
ENSMUSG00000017390	ENSMUSG00000017390	11676	Aldoc	aldolase C, fructose-bisphosphate	0.193026	3.81492	0.350839	0.557046	0.856338
ENSMUSG00000039427	ENSMUSG00000039427	208211	Alg1	asparagine-linked glycosylation 1 (beta-1,4-mannosyltransferase)	-0.0443092	4.31261	0.0872165	0.769119	0.937908
ENSMUSG00000075470	ENSMUSG00000075470	380959	Alg10b	asparagine-linked glycosylation 10B (alpha-1,2-glucosyltransferase)	-0.00870839	2.89331	0.000521084	0.981901	0.996593
ENSMUSG00000063362	ENSMUSG00000063362	207958	Alg11	asparagine-linked glycosylation 11 (alpha-1,2-mannosyltransferase)	0.223705	4.74864	2.51953	0.119521	0.562625
ENSMUSG00000035845	ENSMUSG00000035845	223774	Alg12	asparagine-linked glycosylation 12 (alpha-1,6-mannosyltransferase)	0.379859	1.59448	1.39133	0.244444	0.679697
ENSMUSG00000041718	ENSMUSG00000041718	67574	Alg13	asparagine-linked glycosylation 13	0.179544	1.97132	0.368894	0.546693	0.85328
ENSMUSG00000039887	ENSMUSG00000039887	66789	Alg14	asparagine-linked glycosylation 14	0.0576812	3.90103	0.11611	0.734895	0.928765
ENSMUSG00000039740	ENSMUSG00000039740	56737	Alg2	asparagine-linked glycosylation 2 (alpha-1,3-mannosyltransferase)	-0.3024	2.42712	1.89998	0.174967	0.628024
ENSMUSG00000033809	ENSMUSG00000033809	208624	Alg3	asparagine-linked glycosylation 3 (alpha-1,3-mannosyltransferase)	0.0726015	3.15223	0.135073	0.71497	0.922849
ENSMUSG00000036632	ENSMUSG00000036632	66248	Alg5	asparagine-linked glycosylation 5 (dolichyl-phosphate beta-glucosyltransferase)	0.0472016	5.13473	0.168231	0.683656	0.91189
ENSMUSG00000073792	ENSMUSG00000073792	320438	Alg6	asparagine-linked glycosylation 6 (alpha-1,3,-glucosyltransferase)	-0.00211935	3.67169	0.000153386	0.990174	0.997096
ENSMUSG00000035704	ENSMUSG00000035704	381903	Alg8	asparagine-linked glycosylation 8 (alpha-1,3-glucosyltransferase)	0.153441	2.76554	0.622864	0.434167	0.808038
ENSMUSG00000032059	ENSMUSG00000032059	102580	Alg9	asparagine-linked glycosylation 9 (alpha 1,2 mannosyltransferase)	-0.246275	3.61529	1.80879	0.185463	0.640851
ENSMUSG00000079036	ENSMUSG00000079036	211064	Alkbh1	alkB homolog 1, histone H2A dioxygenase	-0.414823	3.18168	5.19759	0.0274612	0.334288
ENSMUSG00000044339	ENSMUSG00000044339	231642	Alkbh2	alkB homolog 2, alpha-ketoglutarate-dependent dioxygenase	0.371149	2.58662	3.60447	0.0641167	0.449786
ENSMUSG00000040174	ENSMUSG00000040174	69113	Alkbh3	alkB homolog 3, alpha-ketoglutarate-dependent dioxygenase	0.108696	3.84172	0.525599	0.472256	0.825033
ENSMUSG00000039754	ENSMUSG00000039754	72041	Alkbh4	alkB homolog 4, lysine demethylase	0.188066	1.54561	0.489788	0.487662	0.830691
ENSMUSG00000042650	ENSMUSG00000042650	268420	Alkbh5	alkB homolog 5, RNA demethylase	-0.143811	5.29076	0.340019	0.563111	0.859856
ENSMUSG00000042831	ENSMUSG00000042831	233065	Alkbh6	alkB homolog 6	0.270899	2.74142	1.17731	0.283745	0.709282
ENSMUSG00000002661	ENSMUSG00000002661	66400	Alkbh7	alkB homolog 7	0.0905818	3.29692	0.276154	0.601841	0.878038
ENSMUSG00000025899	ENSMUSG00000025899	67667	Alkbh8	alkB homolog 8, tRNA methyltransferase	0.150792	3.62674	0.716393	0.401856	0.78883
ENSMUSG00000063810	ENSMUSG00000063810	236266	Alms1	ALMS1, centrosome and basal body associated	0.0699155	1.21052	0.0375446	0.847242	0.957357
ENSMUSG00000060063	ENSMUSG00000060063	11690	Alox5ap	arachidonate 5-lipoxygenase activating protein	-0.0345023	1.67664	0.00944978	0.922996	0.978066
ENSMUSG00000028766	ENSMUSG00000028766	11647	Alpl	alkaline phosphatase, liver/bone/kidney	0.019765	3.68466	0.0103978	0.919238	0.97727
ENSMUSG00000026024	ENSMUSG00000026024	74018	Als2	alsin Rho guanine nucleotide exchange factor	0.361216	2.19238	2.27038	0.138929	0.586973
ENSMUSG00000044037	ENSMUSG00000044037	235633	Als2cl	ALS2 C-terminal like	0.32411	3.45276	2.63421	0.111644	0.550595
ENSMUSG00000025134	ENSMUSG00000025134	21681	Alyref	Aly/REF export factor	0.148483	3.09069	0.350234	0.556974	0.856338
ENSMUSG00000060244	ENSMUSG00000060244	56009	Alyref2	Aly/REF export factor 2	0.350523	2.05878	1.61554	0.210315	0.662813
ENSMUSG00000022244	ENSMUSG00000022244	17117	Amacr	alpha-methylacyl-CoA racemase	-0.180228	6.35268	0.455723	0.503723	0.839373
ENSMUSG00000028356	ENSMUSG00000028356	11699	Ambp	alpha 1 microglobulin/bikunin precursor	0.0344369	10.4835	0.0973186	0.756528	0.934131
ENSMUSG00000040506	ENSMUSG00000040506	228361	Ambra1	autophagy/beclin 1 regulator 1	0.018835	3.02053	0.00979001	0.921626	0.977879
ENSMUSG00000075232	ENSMUSG00000075232	11702	Amd1	S-adenosylmethionine decarboxylase 1	-0.0196155	6.95933	0.021267	0.884712	0.968524
ENSMUSG00000063953	ENSMUSG00000063953	100041585	Amd2	S-adenosylmethionine decarboxylase 2	0.0250009	6.62918	0.0340949	0.854344	0.959686
ENSMUSG00000015890	ENSMUSG00000015890	71761	Amdhd1	amidohydrolase domain containing 1	0.0297394	7.09861	0.0454256	0.832196	0.954922
ENSMUSG00000036820	ENSMUSG00000036820	245847	Amdhd2	amidohydrolase domain containing 2	0.194017	3.90044	1.07825	0.304695	0.725807
ENSMUSG00000050332	ENSMUSG00000050332	72345	Amer1	APC membrane recruitment 1	-0.111826	2.68362	0.344231	0.56036	0.857963
ENSMUSG00000031751	ENSMUSG00000031751	23802	Amfr	autocrine motility factor receptor	0.0152728	6.61522	0.0283791	0.866984	0.963999
ENSMUSG00000050947	ENSMUSG00000050947	229715	Amigo1	adhesion molecule with Ig like domain 1	0.300148	1.09103	0.846706	0.362444	0.766636
ENSMUSG00000048218	ENSMUSG00000048218	105827	Amigo2	adhesion molecule with Ig like domain 2	0.0880958	3.00825	0.146526	0.703699	0.919104
ENSMUSG00000042225	ENSMUSG00000042225	56068	Ammecr1	Alport syndrome, mental retardation, midface hypoplasia and elliptocytosis chromosomal region gene 1	0.218914	2.14544	0.67072	0.417162	0.796388
ENSMUSG00000041915	ENSMUSG00000041915	225339	Ammecr1l	AMME chromosomal region gene 1-like	0.0462355	5.51557	0.148723	0.701595	0.918401
ENSMUSG00000068250	ENSMUSG00000068250	232566	Amn1	antagonist of mitotic exit network 1	0.106487	4.33269	0.26103	0.61197	0.883355
ENSMUSG00000041688	ENSMUSG00000041688	27494	Amot	angiomotin	0.15826	2.37874	0.470412	0.496353	0.833321
ENSMUSG00000013076	ENSMUSG00000013076	75723	Amotl1	angiomotin-like 1	0.101707	3.8263	0.295685	0.589313	0.871869
ENSMUSG00000032531	ENSMUSG00000032531	56332	Amotl2	angiomotin-like 2	0.291729	4.23881	2.79829	0.101378	0.530607
ENSMUSG00000027889	ENSMUSG00000027889	109674	Ampd2	adenosine monophosphate deaminase 2	-0.476195	3.70918	4.65271	0.0364411	0.364341
ENSMUSG00000032607	ENSMUSG00000032607	434437	Amt	aminomethyltransferase	-0.385416	5.67225	6.28226	0.0159179	0.273615
ENSMUSG00000074264	ENSMUSG00000074264	11722	Amy1	amylase 1, salivary	-0.540787	7.40557	11.8517	0.00126479	0.0795518
ENSMUSG00000050022	ENSMUSG00000050022	231842	Amz1	archaelysin family metallopeptidase 1	0.485634	0.978443	0.819912	0.370102	0.772284
ENSMUSG00000020610	ENSMUSG00000020610	13929	Amz2	archaelysin family metallopeptidase 2	0.082585	4.01327	0.441879	0.509645	0.841249
ENSMUSG00000014355	ENSMUSG00000014355	17222	Anapc1	anaphase promoting complex subunit 1	-0.0726265	4.05628	0.26495	0.609286	0.882044
ENSMUSG00000036977	ENSMUSG00000036977	68999	Anapc10	anaphase promoting complex subunit 10	0.140689	2.07832	0.172546	0.679854	0.91189
ENSMUSG00000025135	ENSMUSG00000025135	66156	Anapc11	anaphase promoting complex subunit 11	0.241015	5.35859	5.03577	0.0298479	0.343159
ENSMUSG00000035048	ENSMUSG00000035048	69010	Anapc13	anaphase promoting complex subunit 13	-0.0451932	6.02388	0.130135	0.719998	0.923798
ENSMUSG00000030649	ENSMUSG00000030649	75430	Anapc15	anaphase prompoting complex C subunit 15	0.180059	3.05201	0.761506	0.387539	0.780669
ENSMUSG00000020107	ENSMUSG00000020107	52717	Anapc16	anaphase promoting complex subunit 16	-0.125795	4.96073	1.25246	0.269085	0.698582
ENSMUSG00000026965	ENSMUSG00000026965	99152	Anapc2	anaphase promoting complex subunit 2	0.115159	4.39133	0.447046	0.507193	0.839702
ENSMUSG00000029176	ENSMUSG00000029176	52206	Anapc4	anaphase promoting complex subunit 4	-0.315106	3.84193	3.80013	0.0575642	0.437034
ENSMUSG00000029472	ENSMUSG00000029472	59008	Anapc5	anaphase-promoting complex subunit 5	0.148498	5.52126	0.917138	0.343399	0.755335
ENSMUSG00000029466	ENSMUSG00000029466	56317	Anapc7	anaphase promoting complex subunit 7	0.21963	3.57698	1.82604	0.183422	0.637328
ENSMUSG00000072115	ENSMUSG00000072115	11727	Ang	angiogenin, ribonuclease, RNase A family, 5	0.325726	7.57345	2.74958	0.104784	0.536431
ENSMUSG00000026634	ENSMUSG00000026634	52477	Angel2	angel homolog 2	-0.10042	4.18001	0.714738	0.402395	0.789067
ENSMUSG00000022309	ENSMUSG00000022309	11600	Angpt1	angiopoietin 1	0.642534	0.855479	1.46681	0.232239	0.672838
ENSMUSG00000004105	ENSMUSG00000004105	26360	Angptl2	angiopoietin-like 2	-0.150585	3.04495	0.297233	0.588367	0.87171
ENSMUSG00000028553	ENSMUSG00000028553	30924	Angptl3	angiopoietin-like 3	0.141894	9.36255	1.09865	0.300219	0.722581
ENSMUSG00000002289	ENSMUSG00000002289	57875	Angptl4	angiopoietin-like 4	0.033	6.20976	0.0521991	0.820326	0.951652
ENSMUSG00000038742	ENSMUSG00000038742	70726	Angptl6	angiopoietin-like 6	0.133304	4.24927	0.504643	0.481171	0.829223
ENSMUSG00000047822	ENSMUSG00000047822	624219	Angptl8	angiopoietin-like 8	0.251234	4.2205	1.06506	0.307982	0.728234
ENSMUSG00000022265	ENSMUSG00000022265	11732	Ank	progressive ankylosis	-0.38566	4.12407	6.21582	0.0164484	0.275703
ENSMUSG00000032826	ENSMUSG00000032826	109676	Ank2	ankyrin 2, brain	-0.632484	0.962787	2.68371	0.108428	0.544337
ENSMUSG00000069601	ENSMUSG00000069601	11735	Ank3	ankyrin 3, epithelial	0.0956338	5.47635	0.504071	0.481418	0.829223
ENSMUSG00000020790	ENSMUSG00000020790	11736	Ankfy1	ankyrin repeat and FYVE domain containing 1	-0.198375	4.22116	2.10916	0.153431	0.602757
ENSMUSG00000024483	ENSMUSG00000024483	108857	Ankhd1	ankyrin repeat and KH domain containing 1	0.263897	6.18236	5.52636	0.0232222	0.308387
ENSMUSG00000040351	ENSMUSG00000040351	70797	Ankib1	ankyrin repeat and IBR domain containing 1	-0.119266	3.11407	0.329867	0.568628	0.863429
ENSMUSG00000029501	ENSMUSG00000029501	71782	Ankle2	ankyrin repeat and LEM domain containing 2	0.286507	3.87939	2.66351	0.109727	0.546147
ENSMUSG00000036188	ENSMUSG00000036188	217473	Ankmy2	ankyrin repeat and MYND domain containing 2	0.166073	3.0643	0.779268	0.382106	0.779482
ENSMUSG00000021661	ENSMUSG00000021661	68558	Ankra2	ankyrin repeat, family A (RFXANK-like), 2	-0.01568	3.82512	0.00869958	0.926106	0.979154
ENSMUSG00000031508	ENSMUSG00000031508	102334	Ankrd10	ankyrin repeat domain 10	0.00413374	3.19715	0.000510844	0.982069	0.996593
ENSMUSG00000035569	ENSMUSG00000035569	77087	Ankrd11	ankyrin repeat domain 11	0.25675	6.69229	3.08722	0.0857838	0.498445
ENSMUSG00000034647	ENSMUSG00000034647	106585	Ankrd12	ankyrin repeat domain 12	-0.0259409	4.93049	0.0297857	0.863759	0.963175
ENSMUSG00000041870	ENSMUSG00000041870	68420	Ankrd13a	ankyrin repeat domain 13a	-0.121195	4.03909	0.680709	0.413741	0.795048
ENSMUSG00000039988	ENSMUSG00000039988	433667	Ankrd13c	ankyrin repeat domain 13c	-0.0660498	4.28399	0.14178	0.708306	0.921042
ENSMUSG00000047909	ENSMUSG00000047909	320816	Ankrd16	ankyrin repeat domain 16	-0.0340495	2.78662	0.0423767	0.837842	0.956809
ENSMUSG00000055204	ENSMUSG00000055204	81702	Ankrd17	ankyrin repeat domain 17	0.00517216	6.41427	0.00298613	0.956665	0.989751
ENSMUSG00000054708	ENSMUSG00000054708	70615	Ankrd24	ankyrin repeat domain 24	0.414484	2.11543	1.72452	0.19584	0.649308
ENSMUSG00000007827	ENSMUSG00000007827	232339	Ankrd26	ankyrin repeat domain 26	0.329525	2.8111	1.51092	0.225455	0.668929
ENSMUSG00000034867	ENSMUSG00000034867	245886	Ankrd27	ankyrin repeat domain 27 (VPS9 domain)	0.216337	4.32961	2.21201	0.143988	0.592525
ENSMUSG00000014496	ENSMUSG00000014496	105522	Ankrd28	ankyrin repeat domain 28	-0.120456	4.08309	0.353349	0.555232	0.856055
ENSMUSG00000022237	ENSMUSG00000022237	67434	Ankrd33b	ankyrin repeat domain 33B	0.216014	3.19134	0.711738	0.403377	0.789327
ENSMUSG00000079610	ENSMUSG00000079610	109346	Ankrd39	ankyrin repeat domain 39	-0.0855159	1.86559	0.0681661	0.79523	0.944324
ENSMUSG00000020864	ENSMUSG00000020864	71452	Ankrd40	ankyrin repeat domain 40	-0.0148975	5.28734	0.0116379	0.914576	0.9767
ENSMUSG00000052331	ENSMUSG00000052331	329154	Ankrd44	ankyrin repeat domain 44	0.350142	3.36964	4.41838	0.0412429	0.38063
ENSMUSG00000048307	ENSMUSG00000048307	68839	Ankrd46	ankyrin repeat domain 46	0.0897299	5.53314	0.488398	0.488277	0.83099
ENSMUSG00000031931	ENSMUSG00000031931	56503	Ankrd49	ankyrin repeat domain 49	0.302649	4.20439	3.17576	0.0815581	0.490461
ENSMUSG00000044864	ENSMUSG00000044864	99696	Ankrd50	ankyrin repeat domain 50	0.190187	3.16349	0.829224	0.3674	0.769862
ENSMUSG00000033055	ENSMUSG00000033055	223690	Ankrd54	ankyrin repeat domain 54	-0.119992	2.31963	0.343715	0.560653	0.858084
ENSMUSG00000037904	ENSMUSG00000037904	74251	Ankrd9	ankyrin repeat domain 9	0.215107	1.18048	0.22351	0.638688	0.895377
ENSMUSG00000024219	ENSMUSG00000024219	224650	Anks1	ankyrin repeat and SAM domain containing 1	-0.0340129	3.5848	0.0406466	0.84114	0.957156
ENSMUSG00000022515	ENSMUSG00000022515	72615	Anks3	ankyrin repeat and sterile alpha motif domain containing 3	0.181938	2.91805	1.13146	0.293198	0.716469
ENSMUSG00000030909	ENSMUSG00000030909	72074	Anks4b	ankyrin repeat and sterile alpha motif domain containing 4B	-0.101044	5.39765	0.400582	0.530026	0.84851
ENSMUSG00000026199	ENSMUSG00000026199	52231	Ankzf1	ankyrin repeat and zinc finger domain containing 1	0.141459	3.91934	0.840783	0.364113	0.768002
ENSMUSG00000031075	ENSMUSG00000031075	101772	Ano1	anoctamin 1, calcium activated chloride channel	-0.185482	1.67936	0.19166	0.663655	0.906049
ENSMUSG00000037949	ENSMUSG00000037949	102566	Ano10	anoctamin 10	0.0667281	2.67795	0.0414193	0.839685	0.957156
ENSMUSG00000064210	ENSMUSG00000064210	105722	Ano6	anoctamin 6	0.434913	3.02398	3.608	0.0639913	0.449706
ENSMUSG00000034863	ENSMUSG00000034863	382014	Ano8	anoctamin 8	0.555901	1.21853	3.42518	0.0708499	0.46881
ENSMUSG00000032249	ENSMUSG00000032249	11737	Anp32a	acidic (leucine-rich) nuclear phosphoprotein 32 family, member A	0.081383	6.3991	0.255889	0.615454	0.885575
ENSMUSG00000028333	ENSMUSG00000028333	67628	Anp32b	acidic (leucine-rich) nuclear phosphoprotein 32 family, member B	-0.0195472	5.98401	0.0272083	0.86973	0.964528
ENSMUSG00000015749	ENSMUSG00000015749	66471	Anp32e	acidic (leucine-rich) nuclear phosphoprotein 32 family, member E	-0.271066	4.27798	2.09414	0.154869	0.604852
ENSMUSG00000039062	ENSMUSG00000039062	16790	Anpep	alanyl (membrane) aminopeptidase	-0.336524	5.11816	3.15668	0.082571	0.492389
ENSMUSG00000029338	ENSMUSG00000029338	71914	Antxr2	anthrax toxin receptor 2	-0.367566	4.45362	3.38202	0.0726221	0.473765
ENSMUSG00000024659	ENSMUSG00000024659	16952	Anxa1	annexin A1	-0.53144	1.22522	1.23514	0.272375	0.700259
ENSMUSG00000021866	ENSMUSG00000021866	11744	Anxa11	annexin A11	0.255902	3.9042	1.47886	0.23036	0.671018
ENSMUSG00000032231	ENSMUSG00000032231	12306	Anxa2	annexin A2	-1.19123	5.4568	6.92532	0.0124531	0.249084
ENSMUSG00000029484	ENSMUSG00000029484	11745	Anxa3	annexin A3	0.0836057	2.58948	0.0762713	0.783693	0.940805
ENSMUSG00000029994	ENSMUSG00000029994	11746	Anxa4	annexin A4	-0.263658	4.75314	4.58045	0.0378535	0.367194
ENSMUSG00000027712	ENSMUSG00000027712	11747	Anxa5	annexin A5	-0.371231	6.68317	1.79115	0.188824	0.644038
ENSMUSG00000018340	ENSMUSG00000018340	11749	Anxa6	annexin A6	0.359896	6.47802	4.54952	0.0385451	0.368608
ENSMUSG00000021814	ENSMUSG00000021814	11750	Anxa7	annexin A7	-0.250882	5.66586	4.75129	0.0346056	0.361895
ENSMUSG00000015702	ENSMUSG00000015702	71790	Anxa9	annexin A9	0.662708	1.17602	3.16781	0.081928	0.490461
ENSMUSG00000021458	ENSMUSG00000021458	72061	Aopep	aminopeptidase O	0.0605972	3.76385	0.149084	0.701251	0.918401
ENSMUSG00000063558	ENSMUSG00000063558	11761	Aox1	aldehyde oxidase 1	-1.06511	5.73217	57.195	1.60395e-09	5.75336e-06
ENSMUSG00000064294	ENSMUSG00000064294	71724	Aox3	aldehyde oxidase 3	-0.216107	7.64413	2.81449	0.100423	0.530607
ENSMUSG00000074238	ENSMUSG00000074238	211556	Ap1ar	adaptor-related protein complex 1 associated regulatory protein	-0.196168	4.21447	1.49094	0.228497	0.670718
ENSMUSG00000009090	ENSMUSG00000009090	11764	Ap1b1	adaptor protein complex AP-1, beta 1 subunit	0.140329	5.2241	1.3409	0.253049	0.683943
ENSMUSG00000031731	ENSMUSG00000031731	11765	Ap1g1	adaptor protein complex AP-1, gamma 1 subunit	-0.0825179	5.6254	0.924347	0.341528	0.754447
ENSMUSG00000040701	ENSMUSG00000040701	11766	Ap1g2	adaptor protein complex AP-1, gamma 2 subunit	-0.10181	2.1813	0.234822	0.630346	0.892403
ENSMUSG00000003033	ENSMUSG00000003033	11767	Ap1m1	adaptor-related protein complex AP-1, mu subunit 1	0.190469	4.09104	1.64839	0.205819	0.658781
ENSMUSG00000004849	ENSMUSG00000004849	11769	Ap1s1	adaptor protein complex AP-1, sigma 1	0.173548	4.27601	0.941472	0.337141	0.751133
ENSMUSG00000031367	ENSMUSG00000031367	108012	Ap1s2	adaptor-related protein complex 1, sigma 2 subunit	0.336007	2.93834	1.63007	0.208311	0.660206
ENSMUSG00000060279	ENSMUSG00000060279	11771	Ap2a1	adaptor-related protein complex 2, alpha 1 subunit	0.333827	2.11318	2.35529	0.131934	0.582485
ENSMUSG00000002957	ENSMUSG00000002957	11772	Ap2a2	adaptor-related protein complex 2, alpha 2 subunit	0.035728	5.46244	0.139046	0.711	0.921372
ENSMUSG00000035152	ENSMUSG00000035152	71770	Ap2b1	adaptor-related protein complex 2, beta 1 subunit	0.37903	5.15987	6.36292	0.0152983	0.269535
ENSMUSG00000022841	ENSMUSG00000022841	11773	Ap2m1	adaptor-related protein complex 2, mu 1 subunit	0.221251	5.70024	4.36354	0.0424633	0.386262
ENSMUSG00000008036	ENSMUSG00000008036	232910	Ap2s1	adaptor-related protein complex 2, sigma 1 subunit	0.354538	5.36993	3.33743	0.0746766	0.4755
ENSMUSG00000021686	ENSMUSG00000021686	11774	Ap3b1	adaptor-related protein complex 3, beta 1 subunit	0.145818	4.95866	1.39989	0.243021	0.679697
ENSMUSG00000020198	ENSMUSG00000020198	11776	Ap3d1	adaptor-related protein complex 3, delta 1 subunit	0.149362	5.95367	0.747303	0.392025	0.782278
ENSMUSG00000021824	ENSMUSG00000021824	55946	Ap3m1	adaptor-related protein complex 3, mu 1 subunit	-0.0345478	6.07687	0.0590921	0.809053	0.94856
ENSMUSG00000031539	ENSMUSG00000031539	64933	Ap3m2	adaptor-related protein complex 3, mu 2 subunit	0.345702	1.75531	1.06418	0.307834	0.728234
ENSMUSG00000024480	ENSMUSG00000024480	11777	Ap3s1	adaptor-related protein complex 3, sigma 1 subunit	-0.12465	4.66699	0.436727	0.512111	0.842818
ENSMUSG00000063801	ENSMUSG00000063801	11778	Ap3s2	adaptor-related protein complex 3, sigma 2 subunit	0.117998	3.88272	0.72023	0.400608	0.787674
ENSMUSG00000032952	ENSMUSG00000032952	67489	Ap4b1	adaptor-related protein complex AP-4, beta 1	-0.128761	3.12703	0.372935	0.544513	0.85328
ENSMUSG00000001998	ENSMUSG00000001998	108011	Ap4e1	adaptor-related protein complex AP-4, epsilon 1	-0.0918479	0.852005	0.0635058	0.802198	0.946644
ENSMUSG00000019518	ENSMUSG00000019518	11781	Ap4m1	adaptor-related protein complex AP-4, mu 1	-0.137866	2.99156	0.523642	0.473077	0.825186
ENSMUSG00000020955	ENSMUSG00000020955	11782	Ap4s1	adaptor-related protein complex AP-4, sigma 1	0.210159	3.59653	1.60463	0.211835	0.664527
ENSMUSG00000036291	ENSMUSG00000036291	74385	Ap5m1	adaptor-related protein complex 5, mu 1 subunit	-0.0372846	3.38826	0.046635	0.830012	0.954767
ENSMUSG00000068264	ENSMUSG00000068264	69596	Ap5s1	adaptor-related protein 5 complex, sigma 1 subunit	0.134836	4.348	0.901451	0.347518	0.758394
ENSMUSG00000039623	ENSMUSG00000039623	231855	Ap5z1	adaptor-related protein complex 5, zeta 1 subunit	0.121831	2.95531	0.320208	0.574323	0.866079
ENSMUSG00000019979	ENSMUSG00000019979	11783	Apaf1	apoptotic peptidase activating factor 1	-0.433057	1.30794	1.63646	0.207438	0.660206
ENSMUSG00000004931	ENSMUSG00000004931	57267	Apba3	amyloid beta (A4) precursor protein-binding, family A, member 3	-0.415357	4.56523	0.673004	0.417429	0.796388
ENSMUSG00000026786	ENSMUSG00000026786	54519	Apbb1ip	amyloid beta (A4) precursor protein-binding, family B, member 1 interacting protein	0.161118	2.91421	0.218057	0.642969	0.897529
ENSMUSG00000029207	ENSMUSG00000029207	11787	Apbb2	amyloid beta (A4) precursor protein-binding, family B, member 2	-0.0391519	4.21747	0.116344	0.734638	0.928765
ENSMUSG00000117679	ENSMUSG00000117679	225372	Apbb3	amyloid beta (A4) precursor protein-binding, family B, member 3	0.0289696	3.21557	0.0178765	0.89424	0.97065
ENSMUSG00000005871	ENSMUSG00000005871	11789	Apc	APC, WNT signaling pathway regulator	0.0778422	4.69	0.3165	0.57654	0.867251
ENSMUSG00000026542	ENSMUSG00000026542	20219	Apcs	serum amyloid P-component	0.205107	5.95642	1.51172	0.225334	0.668929
ENSMUSG00000032590	ENSMUSG00000032590	235606	Apeh	acylpeptide hydrolase	-0.0361294	5.02639	0.0717915	0.789983	0.942831
ENSMUSG00000035960	ENSMUSG00000035960	11792	Apex1	apurinic/apyrimidinic endonuclease 1	-0.0656508	4.11874	0.117758	0.733094	0.928286
ENSMUSG00000025269	ENSMUSG00000025269	77622	Apex2	apurinic/apyrimidinic endonuclease 2	0.14558	2.04286	0.295239	0.589593	0.871903
ENSMUSG00000015750	ENSMUSG00000015750	226548	Aph1a	aph1 homolog A, gamma secretase subunit	0.0268235	5.61365	0.0345664	0.853352	0.959593
ENSMUSG00000032375	ENSMUSG00000032375	208117	Aph1b	aph1 homolog B, gamma secretase subunit	0.450222	1.51895	2.12636	0.151802	0.599772
ENSMUSG00000027193	ENSMUSG00000027193	11800	Api5	apoptosis inhibitor 5	-0.22376	5.87242	0.979527	0.328244	0.74394
ENSMUSG00000010911	ENSMUSG00000010911	56369	Apip	APAF1 interacting protein	-0.337589	3.83843	3.95641	0.0528586	0.420138
ENSMUSG00000030051	ENSMUSG00000030051	72103	Aplf	aprataxin and PNKP like factor	0.228915	1.47558	0.582372	0.449408	0.813099
ENSMUSG00000031996	ENSMUSG00000031996	11804	Aplp2	amyloid beta (A4) precursor-like protein 2	-0.125539	7.95797	0.561924	0.457469	0.817609
ENSMUSG00000033096	ENSMUSG00000033096	71881	Apmap	adipocyte plasma membrane associated protein	-0.627488	4.62717	12.5978	0.000924804	0.0663455
ENSMUSG00000032083	ENSMUSG00000032083	11806	Apoa1	apolipoprotein A-I	0.225684	12.4596	2.49292	0.121438	0.566838
ENSMUSG00000005681	ENSMUSG00000005681	11807	Apoa2	apolipoprotein A-II	-0.0659252	12.6432	0.15388	0.696726	0.916474
ENSMUSG00000032080	ENSMUSG00000032080	11808	Apoa4	apolipoprotein A-IV	-0.0359524	9.94436	0.00796872	0.929362	0.980035
ENSMUSG00000032079	ENSMUSG00000032079	66113	Apoa5	apolipoprotein A-V	0.291671	9.67181	6.48548	0.0144058	0.263193
ENSMUSG00000020609	ENSMUSG00000020609	238055	Apob	apolipoprotein B	0.195174	8.99911	0.574999	0.452896	0.813641
ENSMUSG00000040613	ENSMUSG00000040613	11810	Apobec1	apolipoprotein B mRNA editing enzyme, catalytic polypeptide 1	0.246984	2.7095	1.23191	0.272994	0.700284
ENSMUSG00000009585	ENSMUSG00000009585	80287	Apobec3	apolipoprotein B mRNA editing enzyme, catalytic polypeptide 3	0.889415	2.49952	6.424	0.0149463	0.265928
ENSMUSG00000040564	ENSMUSG00000040564	11812	Apoc1	apolipoprotein C-I	-0.174464	12.1926	1.502	0.226807	0.669776
ENSMUSG00000032081	ENSMUSG00000032081	11814	Apoc3	apolipoprotein C-III	0.102968	11.0644	0.668454	0.417945	0.796611
ENSMUSG00000074336	ENSMUSG00000074336	11425	Apoc4	apolipoprotein C-IV	0.110064	10.2384	0.763203	0.387015	0.780669
ENSMUSG00000002985	ENSMUSG00000002985	11816	Apoe	apolipoprotein E	0.00437172	14.7145	0.00129222	0.971485	0.993942
ENSMUSG00000047631	ENSMUSG00000047631	103161	Apof	apolipoprotein F	0.0517918	9.33657	0.184208	0.669851	0.908042
ENSMUSG00000000049	ENSMUSG00000000049	11818	Apoh	apolipoprotein H	-0.00977744	10.5727	0.00663936	0.935424	0.981903
ENSMUSG00000010601	ENSMUSG00000010601	75761	Apol7a	apolipoprotein L 7a	-0.0790218	6.8163	0.209949	0.649083	0.900269
ENSMUSG00000057346	ENSMUSG00000057346	223672	Apol9a	apolipoprotein L 9a	0.461346	5.44083	2.88281	0.0976307	0.524472
ENSMUSG00000068246	ENSMUSG00000068246	71898	Apol9b	apolipoprotein L 9b	0.283692	5.72396	1.15981	0.288228	0.712511
ENSMUSG00000090698	ENSMUSG00000090698	381823	Apold1	apolipoprotein L domain containing 1	0.473314	0.938331	1.48164	0.22993	0.670757
ENSMUSG00000024391	ENSMUSG00000024391	55938	Apom	apolipoprotein M	0.889145	7.1256	19.9614	5.98104e-05	0.0104979
ENSMUSG00000051716	ENSMUSG00000051716	28194	Apon	apolipoprotein N	-0.0706432	7.83227	0.294574	0.59001	0.871903
ENSMUSG00000079508	ENSMUSG00000079508	68316	Apoo	apolipoprotein O	-0.148086	5.16711	1.02162	0.317596	0.735536
ENSMUSG00000025525	ENSMUSG00000025525	68117	Apool	apolipoprotein O-like	-0.242889	4.16431	2.50232	0.120757	0.564985
ENSMUSG00000037787	ENSMUSG00000037787	68020	Apopt1	apoptogenic, mitochondrial 1	0.00308294	3.12813	0.000287949	0.986537	0.996593
ENSMUSG00000022892	ENSMUSG00000022892	11820	App	amyloid beta (A4) precursor protein	0.0520384	5.57063	0.0698694	0.79281	0.943633
ENSMUSG00000018481	ENSMUSG00000018481	66884	Appbp2	amyloid beta precursor protein (cytoplasmic tail) binding protein 2	-0.0562735	4.37719	0.180691	0.672828	0.908919
ENSMUSG00000040760	ENSMUSG00000040760	72993	Appl1	adaptor protein, phosphotyrosine interaction, PH domain and leucine zipper containing 1	0.330538	4.5367	4.80963	0.0335668	0.359845
ENSMUSG00000020263	ENSMUSG00000020263	216190	Appl2	adaptor protein, phosphotyrosine interaction, PH domain and leucine zipper containing 2	0.0710985	3.98484	0.285734	0.595627	0.874738
ENSMUSG00000006589	ENSMUSG00000006589	11821	Aprt	adenine phosphoribosyl transferase	0.576022	5.15883	6.45239	0.0149756	0.265928
ENSMUSG00000028411	ENSMUSG00000028411	66408	Aptx	aprataxin	0.0673177	3.19305	0.104265	0.748281	0.932841
ENSMUSG00000004655	ENSMUSG00000004655	11826	Aqp1	aquaporin 1	0.435069	6.06427	9.34746	0.00376898	0.14966
ENSMUSG00000042797	ENSMUSG00000042797	66333	Aqp11	aquaporin 11	0.184597	5.66813	1.65756	0.204585	0.657738
ENSMUSG00000024411	ENSMUSG00000024411	11829	Aqp4	aquaporin 4	-0.258665	2.7813	1.18636	0.281924	0.708275
ENSMUSG00000030762	ENSMUSG00000030762	11833	Aqp8	aquaporin 8	-0.160255	7.9492	0.370411	0.546399	0.85328
ENSMUSG00000032204	ENSMUSG00000032204	64008	Aqp9	aquaporin 9	-0.169358	7.81265	1.75554	0.191942	0.646732
ENSMUSG00000040383	ENSMUSG00000040383	11834	Aqr	aquarius	0.0682706	4.26016	0.201001	0.656088	0.903526
ENSMUSG00000046532	ENSMUSG00000046532	11835	Ar	androgen receptor	-0.342521	4.84395	4.13374	0.0480235	0.401964
ENSMUSG00000001127	ENSMUSG00000001127	11836	Araf	Araf proto-oncogene, serine/threonine kinase	0.11465	5.21373	0.683989	0.412627	0.794584
ENSMUSG00000032812	ENSMUSG00000032812	69710	Arap1	ArfGAP with RhoGAP domain, ankyrin repeat and PH domain 1	0.102248	4.59972	0.508389	0.479557	0.828998
ENSMUSG00000037999	ENSMUSG00000037999	212285	Arap2	ArfGAP with RhoGAP domain, ankyrin repeat and PH domain 2	-0.0321503	5.26982	0.0628772	0.803158	0.94695
ENSMUSG00000024451	ENSMUSG00000024451	106952	Arap3	ArfGAP with RhoGAP domain, ankyrin repeat and PH domain 3	0.177123	2.9482	0.818579	0.370465	0.772427
ENSMUSG00000032096	ENSMUSG00000032096	213827	Arcn1	archain 1	-0.014436	5.11012	0.00764435	0.93072	0.980564
ENSMUSG00000042350	ENSMUSG00000042350	68497	Arel1	apoptosis resistant E3 ubiquitin protein ligase 1	-0.0896083	4.82113	0.496545	0.484692	0.829785
ENSMUSG00000048076	ENSMUSG00000048076	11840	Arf1	ADP-ribosylation factor 1	-0.263084	7.63578	4.9397	0.0313703	0.349457
ENSMUSG00000062421	ENSMUSG00000062421	11841	Arf2	ADP-ribosylation factor 2	0.143548	2.62966	0.508424	0.479542	0.828998
ENSMUSG00000051853	ENSMUSG00000051853	11842	Arf3	ADP-ribosylation factor 3	-0.134507	5.05905	0.852572	0.360802	0.765908
ENSMUSG00000021877	ENSMUSG00000021877	11843	Arf4	ADP-ribosylation factor 4	-0.262357	6.53788	0.681888	0.414256	0.795343
ENSMUSG00000020440	ENSMUSG00000020440	11844	Arf5	ADP-ribosylation factor 5	0.426262	6.05362	2.85423	0.099205	0.5288
ENSMUSG00000044147	ENSMUSG00000044147	11845	Arf6	ADP-ribosylation factor 6	-0.0255628	5.45574	0.041247	0.839987	0.957156
ENSMUSG00000027575	ENSMUSG00000027575	228998	Arfgap1	ADP-ribosylation factor GTPase activating protein 1	0.402953	4.42776	5.71607	0.0211013	0.297567
ENSMUSG00000027255	ENSMUSG00000027255	77038	Arfgap2	ADP-ribosylation factor GTPase activating protein 2	0.0299344	6.37634	0.0686965	0.794453	0.944131
ENSMUSG00000054277	ENSMUSG00000054277	66251	Arfgap3	ADP-ribosylation factor GTPase activating protein 3	-0.414119	2.26045	1.65717	0.204638	0.657738
ENSMUSG00000067851	ENSMUSG00000067851	211673	Arfgef1	ADP-ribosylation factor guanine nucleotide-exchange factor 1(brefeldin A-inhibited)	-0.104983	5.46141	0.662975	0.419845	0.798269
ENSMUSG00000074582	ENSMUSG00000074582	99371	Arfgef2	ADP-ribosylation factor guanine nucleotide-exchange factor 2 (brefeldin A-inhibited)	-0.149513	4.38125	1.19447	0.280307	0.708023
ENSMUSG00000074513	ENSMUSG00000074513	99889	Arfip1	ADP-ribosylation factor interacting protein 1	0.0969883	4.05205	0.421146	0.519699	0.845771
ENSMUSG00000030881	ENSMUSG00000030881	76932	Arfip2	ADP-ribosylation factor interacting protein 2	0.317599	2.91521	3.10979	0.0846841	0.496073
ENSMUSG00000038671	ENSMUSG00000038671	76688	Arfrp1	ADP-ribosylation factor related protein 1	0.103408	4.07394	0.415699	0.522399	0.845904
ENSMUSG00000019987	ENSMUSG00000019987	11846	Arg1	arginase, liver	0.130556	9.82491	1.48626	0.229216	0.670757
ENSMUSG00000040459	ENSMUSG00000040459	234023	Arglu1	arginine and glutamate rich 1	0.126975	6.15504	1.30777	0.25891	0.689378
ENSMUSG00000027247	ENSMUSG00000027247	228359	Arhgap1	Rho GTPase activating protein 1	0.00167707	3.2094	7.42132e-05	0.993165	0.997163
ENSMUSG00000037148	ENSMUSG00000037148	78514	Arhgap10	Rho GTPase activating protein 10	0.081264	2.54271	0.0678492	0.795695	0.944497
ENSMUSG00000041225	ENSMUSG00000041225	75415	Arhgap12	Rho GTPase activating protein 12	-0.123903	4.28798	0.809618	0.373074	0.773684
ENSMUSG00000049744	ENSMUSG00000049744	76117	Arhgap15	Rho GTPase activating protein 15	0.561761	1.27986	1.89009	0.176071	0.628873
ENSMUSG00000030766	ENSMUSG00000030766	70497	Arhgap17	Rho GTPase activating protein 17	-0.0414966	2.97446	0.0385603	0.845216	0.957296
ENSMUSG00000039031	ENSMUSG00000039031	73910	Arhgap18	Rho GTPase activating protein 18	-0.183804	3.95168	1.32936	0.255072	0.685765
ENSMUSG00000036591	ENSMUSG00000036591	71435	Arhgap21	Rho GTPase activating protein 21	0.0900888	4.15282	0.310589	0.58011	0.868832
ENSMUSG00000049807	ENSMUSG00000049807	58996	Arhgap23	Rho GTPase activating protein 23	0.400422	3.78498	7.31068	0.00967129	0.222983
ENSMUSG00000057315	ENSMUSG00000057315	231532	Arhgap24	Rho GTPase activating protein 24	0.215534	2.48148	0.803153	0.374972	0.773883
ENSMUSG00000030047	ENSMUSG00000030047	232201	Arhgap25	Rho GTPase activating protein 25	0.0502123	1.2734	0.0115905	0.91475	0.9767
ENSMUSG00000036452	ENSMUSG00000036452	71302	Arhgap26	Rho GTPase activating protein 26	0.0570508	3.80253	0.0750779	0.785349	0.942051
ENSMUSG00000039831	ENSMUSG00000039831	214137	Arhgap29	Rho GTPase activating protein 29	0.246923	5.69882	2.67441	0.109024	0.544594
ENSMUSG00000048865	ENSMUSG00000048865	226652	Arhgap30	Rho GTPase activating protein 30	0.342176	2.45404	1.56618	0.217298	0.665624
ENSMUSG00000022799	ENSMUSG00000022799	12549	Arhgap31	Rho GTPase activating protein 31	-0.256642	2.78719	1.58158	0.215089	0.665228
ENSMUSG00000041444	ENSMUSG00000041444	330914	Arhgap32	Rho GTPase activating protein 32	0.327038	2.80656	2.32358	0.134498	0.583368
ENSMUSG00000058230	ENSMUSG00000058230	232906	Arhgap35	Rho GTPase activating protein 35	0.044596	5.03638	0.0871768	0.76917	0.937908
ENSMUSG00000033697	ENSMUSG00000033697	223666	Arhgap39	Rho GTPase activating protein 39	0.399139	1.58691	1.52593	0.223202	0.667956
ENSMUSG00000031389	ENSMUSG00000031389	171207	Arhgap4	Rho GTPase activating protein 4	-0.0193355	1.47937	0.00395505	0.950136	0.987442
ENSMUSG00000050730	ENSMUSG00000050730	71544	Arhgap42	Rho GTPase activating protein 42	0.113537	5.46658	0.503737	0.481563	0.829223
ENSMUSG00000035697	ENSMUSG00000035697	70719	Arhgap45	Rho GTPase activating protein 45	0.337682	2.64263	1.62908	0.208448	0.660206
ENSMUSG00000035133	ENSMUSG00000035133	11855	Arhgap5	Rho GTPase activating protein 5	0.14474	6.53569	2.30234	0.136247	0.584803
ENSMUSG00000031355	ENSMUSG00000031355	11856	Arhgap6	Rho GTPase activating protein 6	-0.12987	3.33773	0.361308	0.550829	0.855334
ENSMUSG00000040345	ENSMUSG00000040345	216445	Arhgap9	Rho GTPase activating protein 9	0.0985174	1.41351	0.0720331	0.789639	0.942831
ENSMUSG00000025132	ENSMUSG00000025132	192662	Arhgdia	Rho GDP dissociation inhibitor (GDI) alpha	0.128459	4.47776	0.446849	0.507286	0.839702
ENSMUSG00000030220	ENSMUSG00000030220	11857	Arhgdib	Rho, GDP dissociation inhibitor (GDI) beta	0.0026143	3.34332	0.000181707	0.989305	0.996816
ENSMUSG00000040940	ENSMUSG00000040940	16801	Arhgef1	Rho guanine nucleotide exchange factor (GEF) 1	-0.00746656	4.13103	0.00360587	0.952385	0.987972
ENSMUSG00000071176	ENSMUSG00000071176	234094	Arhgef10	Rho guanine nucleotide exchange factor (GEF) 10	-0.45865	0.947348	1.47577	0.230841	0.671018
ENSMUSG00000040964	ENSMUSG00000040964	72754	Arhgef10l	Rho guanine nucleotide exchange factor (GEF) 10-like	0.00274693	3.13619	6.87862e-05	0.993422	0.997163
ENSMUSG00000041977	ENSMUSG00000041977	213498	Arhgef11	Rho guanine nucleotide exchange factor (GEF) 11	0.648655	2.1572	7.71089	0.00800127	0.206043
ENSMUSG00000059495	ENSMUSG00000059495	69632	Arhgef12	Rho guanine nucleotide exchange factor (GEF) 12	0.28305	6.86872	4.69086	0.0357186	0.363752
ENSMUSG00000052921	ENSMUSG00000052921	442801	Arhgef15	Rho guanine nucleotide exchange factor (GEF) 15	-0.289159	2.30457	1.30366	0.259648	0.689554
ENSMUSG00000029032	ENSMUSG00000029032	230972	Arhgef16	Rho guanine nucleotide exchange factor (GEF) 16	0.7808	1.42336	4.3663	0.0424009	0.38602
ENSMUSG00000032875	ENSMUSG00000032875	207212	Arhgef17	Rho guanine nucleotide exchange factor (GEF) 17	0.458859	1.59001	1.52929	0.222702	0.667875
ENSMUSG00000004568	ENSMUSG00000004568	102098	Arhgef18	rho/rac guanine nucleotide exchange factor (GEF) 18	0.163156	4.19086	1.43066	0.237987	0.676792
ENSMUSG00000028919	ENSMUSG00000028919	213649	Arhgef19	Rho guanine nucleotide exchange factor (GEF) 19	0.249647	4.70835	3.77324	0.0584194	0.439539
ENSMUSG00000028059	ENSMUSG00000028059	16800	Arhgef2	rho/rac guanine nucleotide exchange factor (GEF) 2	0.0711785	2.71917	0.0632222	0.802631	0.94695
ENSMUSG00000036885	ENSMUSG00000036885	622434	Arhgef26	Rho guanine nucleotide exchange factor (GEF) 26	0.234358	4.55305	1.55486	0.218939	0.666758
ENSMUSG00000021895	ENSMUSG00000021895	71704	Arhgef3	Rho guanine nucleotide exchange factor (GEF) 3	0.134837	4.09222	0.889715	0.350645	0.759767
ENSMUSG00000045094	ENSMUSG00000045094	328967	Arhgef37	Rho guanine nucleotide exchange factor (GEF) 37	0.199614	2.0124	0.63349	0.430301	0.805435
ENSMUSG00000004562	ENSMUSG00000004562	268739	Arhgef40	Rho guanine nucleotide exchange factor (GEF) 40	0.27328	2.76342	1.37903	0.246508	0.680914
ENSMUSG00000033542	ENSMUSG00000033542	54324	Arhgef5	Rho guanine nucleotide exchange factor (GEF) 5	-0.0234247	4.47419	0.0211265	0.885091	0.968524
ENSMUSG00000031133	ENSMUSG00000031133	73341	Arhgef6	Rac/Cdc42 guanine nucleotide exchange factor (GEF) 6	0.321006	1.74645	0.880294	0.353183	0.762048
ENSMUSG00000031511	ENSMUSG00000031511	54126	Arhgef7	Rho guanine nucleotide exchange factor (GEF7)	0.329895	4.63145	6.79306	0.012402	0.248989
ENSMUSG00000025656	ENSMUSG00000025656	236915	Arhgef9	CDC42 guanine nucleotide exchange factor (GEF) 9	-0.533237	2.86534	4.72537	0.0350783	0.361895
ENSMUSG00000007880	ENSMUSG00000007880	93760	Arid1a	AT rich interactive domain 1A (SWI-like)	0.264902	5.52165	2.38801	0.129347	0.57946
ENSMUSG00000069729	ENSMUSG00000069729	239985	Arid1b	AT rich interactive domain 1B (SWI-like)	-0.0130536	4.86891	0.0115522	0.91489	0.9767
ENSMUSG00000033237	ENSMUSG00000033237	77044	Arid2	AT rich interactive domain 2 (ARID, RFX-like)	0.14287	4.3012	0.766771	0.385917	0.780411
ENSMUSG00000019564	ENSMUSG00000019564	13496	Arid3a	AT rich interactive domain 3A (BRIGHT-like)	-0.0288885	1.26989	0.00427742	0.948147	0.986701
ENSMUSG00000004661	ENSMUSG00000004661	56380	Arid3b	AT rich interactive domain 3B (BRIGHT-like)	-0.0533826	2.28242	0.0387646	0.844812	0.957175
ENSMUSG00000048118	ENSMUSG00000048118	238247	Arid4a	AT rich interactive domain 4A (RBP1-like)	0.239931	5.64295	2.67368	0.109071	0.544594
ENSMUSG00000039219	ENSMUSG00000039219	94246	Arid4b	AT rich interactive domain 4B (RBP1-like)	0.275683	5.76151	4.71499	0.0352697	0.361895
ENSMUSG00000019947	ENSMUSG00000019947	71371	Arid5b	AT rich interactive domain 5B (MRF1-like)	0.139986	6.25236	0.195162	0.661237	0.906049
ENSMUSG00000025234	ENSMUSG00000025234	23806	Arih1	ariadne RBR E3 ubiquitin protein ligase 1	0.000434375	5.58727	1.11414e-05	0.997352	0.998744
ENSMUSG00000064145	ENSMUSG00000064145	23807	Arih2	ariadne RBR E3 ubiquitin protein ligase 2	-0.0115374	5.11316	0.00715149	0.932985	0.980986
ENSMUSG00000060904	ENSMUSG00000060904	104303	Arl1	ADP-ribosylation factor-like 1	-0.229163	5.86625	3.14199	0.0831421	0.493091
ENSMUSG00000022911	ENSMUSG00000022911	68146	Arl13b	ADP-ribosylation factor-like 13B	0.291087	2.75201	2.17234	0.147547	0.594979
ENSMUSG00000027122	ENSMUSG00000027122	212772	Arl14ep	ADP-ribosylation factor-like 14 effector protein	0.162646	2.81558	0.610313	0.438804	0.810319
ENSMUSG00000042348	ENSMUSG00000042348	218639	Arl15	ADP-ribosylation factor-like 15	0.0111841	2.50045	0.00212783	0.963414	0.991896
ENSMUSG00000057594	ENSMUSG00000057594	70317	Arl16	ADP-ribosylation factor-like 16	0.0133375	2.52438	0.00326721	0.954674	0.988942
ENSMUSG00000024944	ENSMUSG00000024944	56327	Arl2	ADP-ribosylation factor-like 2	-0.00687657	2.53194	0.000860471	0.976729	0.995427
ENSMUSG00000031776	ENSMUSG00000031776	107566	Arl2bp	ADP-ribosylation factor-like 2 binding protein	-0.31133	2.97157	1.15118	0.289172	0.713353
ENSMUSG00000025035	ENSMUSG00000025035	56350	Arl3	ADP-ribosylation factor-like 3	0.229864	3.84269	1.88415	0.176738	0.629552
ENSMUSG00000047446	ENSMUSG00000047446	11861	Arl4a	ADP-ribosylation factor-like 4A	-0.113586	5.38672	0.591024	0.446082	0.812384
ENSMUSG00000049866	ENSMUSG00000049866	320982	Arl4c	ADP-ribosylation factor-like 4C	0.426496	1.78172	1.86681	0.178701	0.630898
ENSMUSG00000034936	ENSMUSG00000034936	80981	Arl4d	ADP-ribosylation factor-like 4D	0.3074	2.11185	0.757673	0.388726	0.780669
ENSMUSG00000036093	ENSMUSG00000036093	75423	Arl5a	ADP-ribosylation factor-like 5A	0.126525	6.82732	2.29019	0.13726	0.584803
ENSMUSG00000017418	ENSMUSG00000017418	75869	Arl5b	ADP-ribosylation factor-like 5B	0.28179	4.0789	2.98264	0.0910937	0.509064
ENSMUSG00000030654	ENSMUSG00000030654	54208	Arl6ip1	ADP-ribosylation factor-like 6 interacting protein 1	-0.0984827	8.52543	1.35	0.251468	0.682694
ENSMUSG00000029404	ENSMUSG00000029404	65105	Arl6ip4	ADP-ribosylation factor-like 6 interacting protein 4	0.130934	5.17376	0.893019	0.34976	0.759415
ENSMUSG00000035199	ENSMUSG00000035199	65106	Arl6ip5	ADP-ribosylation factor-like 6 interacting protein 5	0.202059	1.61139	0.198974	0.657712	0.904051
ENSMUSG00000026960	ENSMUSG00000026960	65103	Arl6ip6	ADP-ribosylation factor-like 6 interacting protein 6	0.771112	2.60243	11.8392	0.00127153	0.0795518
ENSMUSG00000026426	ENSMUSG00000026426	68724	Arl8a	ADP-ribosylation factor-like 8A	-0.0070893	3.10889	0.0011865	0.972676	0.994409
ENSMUSG00000030105	ENSMUSG00000030105	67166	Arl8b	ADP-ribosylation factor-like 8B	0.149948	5.21824	2.03496	0.160693	0.609579
ENSMUSG00000027599	ENSMUSG00000027599	74252	Armc1	armadillo repeat containing 1	0.0106593	6.39132	0.00975072	0.921783	0.977879
ENSMUSG00000038525	ENSMUSG00000038525	67211	Armc10	armadillo repeat containing 10	0.188341	2.83974	0.925983	0.341106	0.754447
ENSMUSG00000042178	ENSMUSG00000042178	233912	Armc5	armadillo repeat containing 5	-0.0838554	2.78139	0.122778	0.727693	0.926601
ENSMUSG00000002343	ENSMUSG00000002343	76813	Armc6	armadillo repeat containing 6	-0.0145795	1.65255	0.00167339	0.967553	0.992476
ENSMUSG00000032468	ENSMUSG00000032468	74125	Armc8	armadillo repeat containing 8	-0.0293875	3.94225	0.0281755	0.867457	0.963999
ENSMUSG00000062590	ENSMUSG00000062590	78795	Armc9	armadillo repeat containing 9	-0.160888	2.04235	0.289762	0.593054	0.873748
ENSMUSG00000033436	ENSMUSG00000033436	67416	Armcx2	armadillo repeat containing, X-linked 2	0.344763	1.97656	1.22773	0.273799	0.701511
ENSMUSG00000049047	ENSMUSG00000049047	71703	Armcx3	armadillo repeat containing, X-linked 3	-0.101599	2.87676	0.181658	0.672006	0.908474
ENSMUSG00000072969	ENSMUSG00000072969	494468	Armcx5	armadillo repeat containing, X-linked 5	-0.299946	1.97496	0.973057	0.329249	0.744651
ENSMUSG00000039901	ENSMUSG00000039901	71617	Armh3	armadillo-like helical domain containing 3	0.275021	2.83854	2.10868	0.153476	0.602757
ENSMUSG00000061759	ENSMUSG00000061759	73419	Armt1	acidic residue methyltransferase 1	0.122401	3.38887	0.58724	0.447532	0.812384
ENSMUSG00000015522	ENSMUSG00000015522	11863	Arnt	aryl hydrocarbon receptor nuclear translocator	0.00222381	4.04425	0.000166996	0.989747	0.996974
ENSMUSG00000055116	ENSMUSG00000055116	11865	Arntl	aryl hydrocarbon receptor nuclear translocator-like	-0.242282	2.2165	0.160559	0.690898	0.914953
ENSMUSG00000029621	ENSMUSG00000029621	56443	Arpc1a	actin related protein 2/3 complex, subunit 1A	-0.367705	5.37153	3.60463	0.0643555	0.450495
ENSMUSG00000029622	ENSMUSG00000029622	11867	Arpc1b	actin related protein 2/3 complex, subunit 1B	0.267668	6.35574	2.50882	0.120374	0.564176
ENSMUSG00000006304	ENSMUSG00000006304	76709	Arpc2	actin related protein 2/3 complex, subunit 2	-0.00837203	7.61297	0.0117532	0.914156	0.9767
ENSMUSG00000029465	ENSMUSG00000029465	56378	Arpc3	actin related protein 2/3 complex, subunit 3	0.0229775	5.21503	0.0220977	0.882499	0.96806
ENSMUSG00000079426	ENSMUSG00000079426	68089	Arpc4	actin related protein 2/3 complex, subunit 4	0.286033	5.15862	1.65458	0.205512	0.658736
ENSMUSG00000008475	ENSMUSG00000008475	67771	Arpc5	actin related protein 2/3 complex, subunit 5	-0.131439	6.21631	1.34145	0.252954	0.683943
ENSMUSG00000026755	ENSMUSG00000026755	74192	Arpc5l	actin related protein 2/3 complex, subunit 5-like	0.0370347	5.81189	0.0894417	0.76628	0.936931
ENSMUSG00000039043	ENSMUSG00000039043	70420	Arpin	actin-related protein 2/3 complex inhibitor	-0.222347	1.85799	0.523645	0.473075	0.825186
ENSMUSG00000007656	ENSMUSG00000007656	59046	Arpp19	cAMP-regulated phosphoprotein 19	-0.0380754	6.74781	0.113772	0.737475	0.929924
ENSMUSG00000018909	ENSMUSG00000018909	109689	Arrb1	arrestin, beta 1	0.0579304	3.49822	0.0997503	0.753605	0.933345
ENSMUSG00000060216	ENSMUSG00000060216	216869	Arrb2	arrestin, beta 2	0.189658	4.53183	1.8973	0.175265	0.628297
ENSMUSG00000026972	ENSMUSG00000026972	215705	Arrdc1	arrestin domain containing 1	-0.196671	1.54249	0.346133	0.559283	0.857665
ENSMUSG00000002910	ENSMUSG00000002910	70807	Arrdc2	arrestin domain containing 2	-0.721455	2.13814	6.41256	0.0149299	0.265928
ENSMUSG00000074794	ENSMUSG00000074794	105171	Arrdc3	arrestin domain containing 3	-0.492394	7.00502	2.80722	0.102238	0.531207
ENSMUSG00000042659	ENSMUSG00000042659	66412	Arrdc4	arrestin domain containing 4	0.0516712	2.63869	0.0491018	0.825647	0.95443
ENSMUSG00000022620	ENSMUSG00000022620	11883	Arsa	arylsulfatase A	-0.0688584	4.96366	0.131342	0.718781	0.923495
ENSMUSG00000042082	ENSMUSG00000042082	11881	Arsb	arylsulfatase B	0.281607	3.49395	1.54612	0.220216	0.667175
ENSMUSG00000020604	ENSMUSG00000020604	74008	Arsg	arylsulfatase G	-0.0297101	4.17604	0.0162984	0.899016	0.972148
ENSMUSG00000021592	ENSMUSG00000021592	77041	Arsk	arylsulfatase K	0.233495	3.07625	1.78548	0.188267	0.643973
ENSMUSG00000030217	ENSMUSG00000030217	109978	Art4	ADP-ribosyltransferase 4	0.225254	1.50289	0.267724	0.607423	0.881165
ENSMUSG00000000325	ENSMUSG00000000325	11877	Arvcf	armadillo repeat gene deleted in velocardiofacial syndrome	-0.102858	2.16686	0.131066	0.719042	0.923495
ENSMUSG00000003559	ENSMUSG00000003559	57344	As3mt	arsenic (+3 oxidation state) methyltransferase	-0.0563663	4.55222	0.0671641	0.796758	0.944734
ENSMUSG00000031591	ENSMUSG00000031591	11886	Asah1	N-acylsphingosine amidohydrolase 1	-0.0945858	3.20866	0.16357	0.687827	0.913495
ENSMUSG00000024887	ENSMUSG00000024887	54447	Asah2	N-acylsphingosine amidohydrolase 2	-0.226073	4.3848	2.2005	0.14501	0.593286
ENSMUSG00000022377	ENSMUSG00000022377	13196	Asap1	ArfGAP with SH3 domain, ankyrin repeat and PH domain1	0.216019	4.93444	2.42368	0.126593	0.576286
ENSMUSG00000052632	ENSMUSG00000052632	211914	Asap2	ArfGAP with SH3 domain, ankyrin repeat and PH domain 2	-0.586173	2.67496	3.5845	0.0648306	0.452534
ENSMUSG00000036995	ENSMUSG00000036995	230837	Asap3	ArfGAP with SH3 domain, ankyrin repeat and PH domain 3	0.61137	1.22446	2.7309	0.105459	0.538691
ENSMUSG00000026311	ENSMUSG00000026311	65247	Asb1	ankyrin repeat and SOCS box-containing 1	0.18218	2.78521	0.928393	0.340485	0.753998
ENSMUSG00000033781	ENSMUSG00000033781	142688	Asb13	ankyrin repeat and SOCS box-containing 13	-0.0970961	4.84163	0.681861	0.413349	0.794821
ENSMUSG00000021200	ENSMUSG00000021200	65256	Asb2	ankyrin repeat and SOCS box-containing 2	0.75857	0.922562	2.87848	0.096752	0.522632
ENSMUSG00000020305	ENSMUSG00000020305	65257	Asb3	ankyrin repeat and SOCS box-containing 3	0.0784533	3.03598	0.102335	0.750542	0.933031
ENSMUSG00000039483	ENSMUSG00000039483	72323	Asb6	ankyrin repeat and SOCS box-containing 6	0.0175991	1.84738	0.00325456	0.954762	0.988942
ENSMUSG00000030509	ENSMUSG00000030509	117589	Asb7	ankyrin repeat and SOCS box-containing 7	-0.0830721	3.27019	0.292371	0.5914	0.87264
ENSMUSG00000048175	ENSMUSG00000048175	78541	Asb8	ankyrin repeat and SOCS box-containing 8	-0.00463004	4.36045	0.000909504	0.976076	0.995229
ENSMUSG00000044475	ENSMUSG00000044475	69090	Ascc1	activating signal cointegrator 1 complex subunit 1	0.219323	2.97635	0.92969	0.340151	0.753884
ENSMUSG00000020412	ENSMUSG00000020412	75452	Ascc2	activating signal cointegrator 1 complex subunit 2	0.065407	3.36492	0.0964183	0.75762	0.934392
ENSMUSG00000038774	ENSMUSG00000038774	77987	Ascc3	activating signal cointegrator 1 complex subunit 3	0.145197	4.1668	1.24767	0.26999	0.69945
ENSMUSG00000019857	ENSMUSG00000019857	66403	Asf1a	anti-silencing function 1A histone chaperone	0.129724	3.24012	0.57292	0.453088	0.813641
ENSMUSG00000020884	ENSMUSG00000020884	11889	Asgr1	asialoglycoprotein receptor 1	0.0103504	9.52698	0.00369861	0.951778	0.987855
ENSMUSG00000040963	ENSMUSG00000040963	11890	Asgr2	asialoglycoprotein receptor 2	-0.00728346	6.88154	0.00412217	0.949095	0.987092
ENSMUSG00000028053	ENSMUSG00000028053	192195	Ash1l	ASH1 like histone lysine methyltransferase	0.201044	6.17115	2.98767	0.0908304	0.509064
ENSMUSG00000031575	ENSMUSG00000031575	23808	Ash2l	ASH2 like histone lysine methyltransferase complex subunit	-0.175956	3.91776	1.63703	0.20736	0.660206
ENSMUSG00000028008	ENSMUSG00000028008	58170	Asic5	acid-sensing (proton-gated) ion channel family member 5	-0.41761	1.7891	1.66664	0.203371	0.65636
ENSMUSG00000025533	ENSMUSG00000025533	109900	Asl	argininosuccinate lyase	0.322139	6.95793	3.62354	0.0635451	0.449706
ENSMUSG00000052456	ENSMUSG00000052456	56495	Asna1	arsA arsenite transporter, ATP-binding, homolog 1 (bacterial)	0.13413	3.80958	0.73899	0.394589	0.783875
ENSMUSG00000026095	ENSMUSG00000026095	70396	Asnsd1	asparagine synthetase domain containing 1	-0.311525	4.32217	4.7296	0.0350008	0.361895
ENSMUSG00000020774	ENSMUSG00000020774	11484	Aspa	aspartoacylase	0.00527672	3.10852	0.000736257	0.978474	0.996141
ENSMUSG00000038704	ENSMUSG00000038704	68352	Aspdh	aspartate dehydrogenase domain containing	0.243682	6.42004	2.12291	0.152183	0.600161
ENSMUSG00000037686	ENSMUSG00000037686	104816	Aspg	asparaginase	0.40707	6.60787	7.82817	0.00757219	0.201196
ENSMUSG00000028207	ENSMUSG00000028207	65973	Asph	aspartate-beta-hydroxylase	-0.0243058	4.5837	0.045175	0.832653	0.955039
ENSMUSG00000025142	ENSMUSG00000025142	68938	Aspscr1	alveolar soft part sarcoma chromosome region, candidate 1 (human)	0.0836192	3.45448	0.170971	0.681235	0.91189
ENSMUSG00000024654	ENSMUSG00000024654	66514	Asrgl1	asparaginase like 1	-0.0159984	2.91638	0.0072461	0.932544	0.980986
ENSMUSG00000076441	ENSMUSG00000076441	11898	Ass1	argininosuccinate synthetase 1	0.390872	9.23107	3.85104	0.0563477	0.431572
ENSMUSG00000032567	ENSMUSG00000032567	66595	Aste1	asteroid homolog 1	0.366291	2.34316	2.90457	0.0952984	0.518718
ENSMUSG00000042548	ENSMUSG00000042548	228790	Asxl1	additional sex combs like 1	0.112577	4.00371	0.796376	0.376977	0.776102
ENSMUSG00000037486	ENSMUSG00000037486	75302	Asxl2	additional sex combs like 2, transcriptional regulator	0.202775	4.84	3.15251	0.0826449	0.492389
ENSMUSG00000013662	ENSMUSG00000013662	67979	Atad1	ATPase family, AAA domain containing 1	-0.019059	5.37673	0.0128515	0.910251	0.975621
ENSMUSG00000022360	ENSMUSG00000022360	70472	Atad2	ATPase family, AAA domain containing 2	-0.46487	2.03323	2.153	0.14932	0.59689
ENSMUSG00000052812	ENSMUSG00000052812	320817	Atad2b	ATPase family, AAA domain containing 2B	0.201325	4.99777	2.79285	0.1017	0.531207
ENSMUSG00000029036	ENSMUSG00000029036	108888	Atad3a	ATPase family, AAA domain containing 3A	0.0166843	4.94909	0.0114056	0.91543	0.977179
ENSMUSG00000054514	ENSMUSG00000054514	70448	Atad3aos	ATPase family, AAA domain containing 3A, opposite strand	-0.46687	1.10912	1.63114	0.208165	0.660206
ENSMUSG00000017550	ENSMUSG00000017550	237877	Atad5	ATPase family, AAA domain containing 5	-0.234393	1.42438	0.354731	0.554463	0.856055
ENSMUSG00000024426	ENSMUSG00000024426	73242	Atat1	alpha tubulin acetyltransferase 1	0.363807	3.80554	3.72983	0.0598295	0.443711
ENSMUSG00000030850	ENSMUSG00000030850	11907	Ate1	arginyltransferase 1	-0.0266198	4.95564	0.0522469	0.820245	0.951652
ENSMUSG00000023027	ENSMUSG00000023027	11908	Atf1	activating transcription factor 1	-0.160378	4.15925	1.06224	0.30827	0.728234
ENSMUSG00000027104	ENSMUSG00000027104	11909	Atf2	activating transcription factor 2	0.0163963	4.46327	0.00975185	0.921779	0.977879
ENSMUSG00000026628	ENSMUSG00000026628	11910	Atf3	activating transcription factor 3	-0.0363219	1.62975	0.0078576	0.929763	0.980035
ENSMUSG00000042406	ENSMUSG00000042406	11911	Atf4	activating transcription factor 4	0.211827	6.22896	1.68171	0.201378	0.655483
ENSMUSG00000038539	ENSMUSG00000038539	107503	Atf5	activating transcription factor 5	0.329015	7.70583	2.20551	0.145355	0.594066
ENSMUSG00000026663	ENSMUSG00000026663	226641	Atf6	activating transcription factor 6	0.00189002	5.28495	0.000269287	0.986981	0.996593
ENSMUSG00000015461	ENSMUSG00000015461	12915	Atf6b	activating transcription factor 6 beta	0.0172428	4.02814	0.00720453	0.932738	0.980986
ENSMUSG00000099083	ENSMUSG00000099083	223922	Atf7	activating transcription factor 7	0.393602	3.50068	4.56214	0.0382209	0.367818
ENSMUSG00000030213	ENSMUSG00000030213	54343	Atf7ip	activating transcription factor 7 interacting protein	0.217015	4.8424	3.33517	0.0745226	0.4755
ENSMUSG00000021619	ENSMUSG00000021619	66795	Atg10	autophagy related 10	-0.436678	2.91849	4.72017	0.035174	0.361895
ENSMUSG00000037204	ENSMUSG00000037204	68118	Atg101	autophagy related 101	-0.00910804	5.42152	0.00469933	0.945653	0.985682
ENSMUSG00000032905	ENSMUSG00000032905	67526	Atg12	autophagy related 12	-0.0302263	4.8303	0.0675036	0.796204	0.944648
ENSMUSG00000027244	ENSMUSG00000027244	51897	Atg13	autophagy related 13	-0.0199672	4.26836	0.0194265	0.889779	0.969513
ENSMUSG00000037526	ENSMUSG00000037526	100504663	Atg14	autophagy related 14	-0.0697692	4.11459	0.188599	0.666182	0.907097
ENSMUSG00000026289	ENSMUSG00000026289	77040	Atg16l1	autophagy related 16-like 1 (S. cerevisiae)	-0.037929	4.17148	0.0537855	0.817665	0.951336
ENSMUSG00000047767	ENSMUSG00000047767	73683	Atg16l2	autophagy related 16-like 2 (S. cerevisiae)	0.588694	3.55399	5.76248	0.020672	0.29474
ENSMUSG00000024773	ENSMUSG00000024773	329015	Atg2a	autophagy related 2A	0.422815	4.80324	10.3808	0.00238251	0.123264
ENSMUSG00000041341	ENSMUSG00000041341	76559	Atg2b	autophagy related 2B	0.128694	3.74262	0.279528	0.599704	0.877127
ENSMUSG00000022663	ENSMUSG00000022663	67841	Atg3	autophagy related 3	-0.116265	5.67107	0.42383	0.51843	0.845148
ENSMUSG00000079418	ENSMUSG00000079418	666468	Atg4a	autophagy related 4A, cysteine peptidase	-0.305735	3.00797	1.99684	0.16458	0.613667
ENSMUSG00000026280	ENSMUSG00000026280	66615	Atg4b	autophagy related 4B, cysteine peptidase	0.12071	4.3256	0.75651	0.389088	0.780669
ENSMUSG00000028550	ENSMUSG00000028550	242557	Atg4c	autophagy related 4C, cysteine peptidase	-0.106766	2.79291	0.177788	0.67531	0.909285
ENSMUSG00000002820	ENSMUSG00000002820	235040	Atg4d	autophagy related 4D, cysteine peptidase	0.426494	3.70623	5.18962	0.0275738	0.334481
ENSMUSG00000038160	ENSMUSG00000038160	11793	Atg5	autophagy related 5	-0.151616	6.18028	2.52503	0.119129	0.562011
ENSMUSG00000030314	ENSMUSG00000030314	74244	Atg7	autophagy related 7	-0.0980038	5.19019	0.598074	0.4434	0.811135
ENSMUSG00000026192	ENSMUSG00000026192	108147	Atic	5-aminoimidazole-4-carboxamide ribonucleotide formyltransferase/IMP cyclohydrolase	0.112166	3.55621	0.449963	0.505817	0.839435
ENSMUSG00000059811	ENSMUSG00000059811	56298	Atl2	atlastin GTPase 2	0.0140743	5.79339	0.00909432	0.924453	0.978464
ENSMUSG00000024759	ENSMUSG00000024759	109168	Atl3	atlastin GTPase 3	-0.114969	5.56547	1.25958	0.267746	0.697113
ENSMUSG00000034218	ENSMUSG00000034218	11920	Atm	ataxia telangiectasia mutated	0.398148	3.82902	4.1351	0.0479883	0.401964
ENSMUSG00000047388	ENSMUSG00000047388	234776	Atmin	ATM interactor	0.266921	2.793	1.79302	0.187355	0.643058
ENSMUSG00000004263	ENSMUSG00000004263	13498	Atn1	atrophin 1	0.302286	2.31723	1.26434	0.266857	0.696325
ENSMUSG00000037621	ENSMUSG00000037621	71093	Atoh8	atonal bHLH transcription factor 8	0.441857	3.54996	5.21511	0.0272153	0.3328
ENSMUSG00000018585	ENSMUSG00000018585	11927	Atox1	antioxidant 1 copper chaperone	-0.205958	7.24918	1.85947	0.179541	0.631386
ENSMUSG00000046808	ENSMUSG00000046808	231287	Atp10d	ATPase, class V, type 10D	0.164939	1.09883	0.186446	0.667975	0.907751
ENSMUSG00000031441	ENSMUSG00000031441	50770	Atp11a	ATPase, class VI, type 11A	0.251953	2.75281	0.953282	0.33416	0.748521
ENSMUSG00000037400	ENSMUSG00000037400	76295	Atp11b	ATPase, class VI, type 11B	0.208996	4.36603	2.01926	0.16228	0.612259
ENSMUSG00000062949	ENSMUSG00000062949	320940	Atp11c	ATPase, class VI, type 11C	0.241462	6.75906	3.45178	0.0698033	0.465423
ENSMUSG00000031862	ENSMUSG00000031862	170759	Atp13a1	ATPase type 13A1	0.135305	4.33218	0.966924	0.330761	0.746112
ENSMUSG00000036622	ENSMUSG00000036622	74772	Atp13a2	ATPase type 13A2	0.0900542	3.25347	0.213494	0.646292	0.898895
ENSMUSG00000022533	ENSMUSG00000022533	224088	Atp13a3	ATPase type 13A3	-0.0819699	5.91688	0.248425	0.620639	0.887586
ENSMUSG00000033161	ENSMUSG00000033161	11928	Atp1a1	ATPase, Na+/K+ transporting, alpha 1 polypeptide	0.181928	8.54027	0.937888	0.338294	0.752301
ENSMUSG00000007097	ENSMUSG00000007097	98660	Atp1a2	ATPase, Na+/K+ transporting, alpha 2 polypeptide	0.989756	1.11071	3.32047	0.0752485	0.476004
ENSMUSG00000026576	ENSMUSG00000026576	11931	Atp1b1	ATPase, Na+/K+ transporting, beta 1 polypeptide	0.21476	6.05901	4.25805	0.0449232	0.393049
ENSMUSG00000032412	ENSMUSG00000032412	11933	Atp1b3	ATPase, Na+/K+ transporting, beta 3 polypeptide	-0.0731863	4.56885	0.24852	0.620573	0.887586
ENSMUSG00000025436	ENSMUSG00000025436	68876	Atp23	ATP23 metallopeptidase and ATP synthase assembly factor homolog	-0.258015	2.38397	1.01348	0.319509	0.736834
ENSMUSG00000029467	ENSMUSG00000029467	11938	Atp2a2	ATPase, Ca++ transporting, cardiac muscle, slow twitch 2	0.0408134	6.12838	0.0641322	0.801246	0.946556
ENSMUSG00000019943	ENSMUSG00000019943	67972	Atp2b1	ATPase, Ca++ transporting, plasma membrane 1	-0.0194397	6.23349	0.0542482	0.816897	0.951329
ENSMUSG00000030302	ENSMUSG00000030302	11941	Atp2b2	ATPase, Ca++ transporting, plasma membrane 2	0.317063	1.16918	0.687472	0.411448	0.793871
ENSMUSG00000026463	ENSMUSG00000026463	381290	Atp2b4	ATPase, Ca++ transporting, plasma membrane 4	0.0120618	3.37965	0.00336936	0.953972	0.988418
ENSMUSG00000032570	ENSMUSG00000032570	235574	Atp2c1	ATPase, Ca++-sequestering	-0.154891	3.99906	0.781809	0.381338	0.77927
ENSMUSG00000025428	ENSMUSG00000025428	11946	Atp5a1	ATP synthase, H+ transporting, mitochondrial F1 complex, alpha subunit 1	-0.145439	9.21589	1.9411	0.170466	0.621613
ENSMUSG00000025393	ENSMUSG00000025393	11947	Atp5b	ATP synthase, H+ transporting mitochondrial F1 complex, beta subunit	-0.0379409	8.82279	0.156067	0.69469	0.916098
ENSMUSG00000025781	ENSMUSG00000025781	11949	Atp5c1	ATP synthase, H+ transporting, mitochondrial F1 complex, gamma polypeptide 1	-0.0562927	8.06785	0.251647	0.618389	0.887509
ENSMUSG00000003072	ENSMUSG00000003072	66043	Atp5d	ATP synthase, H+ transporting, mitochondrial F1 complex, delta subunit	-0.0651547	8.11481	0.294994	0.589746	0.871903
ENSMUSG00000016252	ENSMUSG00000016252	67126	Atp5e	ATP synthase, H+ transporting, mitochondrial F1 complex, epsilon subunit	-0.0434384	7.603	0.132813	0.717258	0.923174
ENSMUSG00000000563	ENSMUSG00000000563	11950	Atp5f1	ATP synthase, H+ transporting, mitochondrial F0 complex, subunit B1	-0.204357	8.31514	2.01401	0.162815	0.612958
ENSMUSG00000006057	ENSMUSG00000006057	11951	Atp5g1	ATP synthase, H+ transporting, mitochondrial F0 complex, subunit C1 (subunit 9)	0.184468	8.10753	1.93589	0.171028	0.62261
ENSMUSG00000062683	ENSMUSG00000062683	67942	Atp5g2	ATP synthase, H+ transporting, mitochondrial F0 complex, subunit C2 (subunit 9)	-0.0645689	7.93765	0.357596	0.552874	0.855852
ENSMUSG00000018770	ENSMUSG00000018770	228033	Atp5g3	ATP synthase, H+ transporting, mitochondrial F0 complex, subunit C3 (subunit 9)	-0.107948	10.0827	0.694165	0.409198	0.791615
ENSMUSG00000034566	ENSMUSG00000034566	71679	Atp5h	ATP synthase, H+ transporting, mitochondrial F0 complex, subunit D	0.0928285	8.40735	0.548134	0.462967	0.820484
ENSMUSG00000022890	ENSMUSG00000022890	11957	Atp5j	ATP synthase, H+ transporting, mitochondrial F0 complex, subunit F	-0.200985	8.01938	1.24547	0.270616	0.699581
ENSMUSG00000038690	ENSMUSG00000038690	57423	Atp5j2	ATP synthase, H+ transporting, mitochondrial F0 complex, subunit F2	0.0764697	8.53397	0.312088	0.5792	0.868163
ENSMUSG00000050856	ENSMUSG00000050856	11958	Atp5k	ATP synthase, H+ transporting, mitochondrial F1F0 complex, subunit E	0.0646747	8.65338	0.262274	0.611093	0.882672
ENSMUSG00000038717	ENSMUSG00000038717	27425	Atp5l	ATP synthase, H+ transporting, mitochondrial F0 complex, subunit G	0.00229656	8.77675	0.000488313	0.982469	0.996593
ENSMUSG00000071528	ENSMUSG00000071528	66477	Atp5md	ATP synthase membrane subunit DAPIT	-0.161099	7.9825	1.78188	0.188704	0.644038
ENSMUSG00000021290	ENSMUSG00000021290	70257	Atp5mpl	ATP synthase membrane subunit 6.8PL	0.0569841	7.92534	0.232498	0.63204	0.892917
ENSMUSG00000022956	ENSMUSG00000022956	28080	Atp5o	ATP synthase, H+ transporting, mitochondrial F1 complex, O subunit	0.0284891	8.14723	0.0722309	0.789357	0.942831
ENSMUSG00000064357	ENSMUSG00000064357	17705	ATP6	ATP synthase F0 subunit 6	-0.0951965	14.4722	0.547597	0.463185	0.820484
ENSMUSG00000019087	ENSMUSG00000019087	54411	Atp6ap1	ATPase, H+ transporting, lysosomal accessory protein 1	0.144641	6.02194	0.692868	0.409702	0.792239
ENSMUSG00000031007	ENSMUSG00000031007	70495	Atp6ap2	ATPase, H+ transporting, lysosomal accessory protein 2	-0.0325154	5.33104	0.0987859	0.754759	0.933345
ENSMUSG00000019302	ENSMUSG00000019302	11975	Atp6v0a1	ATPase, H+ transporting, lysosomal V0 subunit A1	0.00437302	4.99896	0.00111231	0.973544	0.994428
ENSMUSG00000038023	ENSMUSG00000038023	21871	Atp6v0a2	ATPase, H+ transporting, lysosomal V0 subunit A2	0.121672	4.46864	0.971577	0.329613	0.745004
ENSMUSG00000033379	ENSMUSG00000033379	114143	Atp6v0b	ATPase, H+ transporting, lysosomal V0 subunit B	0.0533399	5.92141	0.139934	0.710122	0.921144
ENSMUSG00000024121	ENSMUSG00000024121	11984	Atp6v0c	ATPase, H+ transporting, lysosomal V0 subunit C	0.156394	8.02605	1.4541	0.23424	0.674518
ENSMUSG00000013160	ENSMUSG00000013160	11972	Atp6v0d1	ATPase, H+ transporting, lysosomal V0 subunit D1	0.0877436	5.03739	0.589067	0.446831	0.812384
ENSMUSG00000028238	ENSMUSG00000028238	242341	Atp6v0d2	ATPase, H+ transporting, lysosomal V0 subunit D2	-0.119171	2.11285	0.0746258	0.786046	0.942391
ENSMUSG00000015575	ENSMUSG00000015575	11974	Atp6v0e	ATPase, H+ transporting, lysosomal V0 subunit E	-0.0322221	6.08882	0.062521	0.803705	0.94728
ENSMUSG00000052459	ENSMUSG00000052459	11964	Atp6v1a	ATPase, H+ transporting, lysosomal V1 subunit A	0.0169529	6.55572	0.024179	0.877133	0.966843
ENSMUSG00000006273	ENSMUSG00000006273	11966	Atp6v1b2	ATPase, H+ transporting, lysosomal V1 subunit B2	-0.116813	5.56608	0.648186	0.42504	0.801728
ENSMUSG00000022295	ENSMUSG00000022295	66335	Atp6v1c1	ATPase, H+ transporting, lysosomal V1 subunit C1	0.213561	4.79865	3.6567	0.0622908	0.449679
ENSMUSG00000021114	ENSMUSG00000021114	73834	Atp6v1d	ATPase, H+ transporting, lysosomal V1 subunit D	0.175702	6.11264	4.18854	0.046629	0.399502
ENSMUSG00000019210	ENSMUSG00000019210	11973	Atp6v1e1	ATPase, H+ transporting, lysosomal V1 subunit E1	-0.0209192	7.10893	0.046303	0.830609	0.954767
ENSMUSG00000004285	ENSMUSG00000004285	66144	Atp6v1f	ATPase, H+ transporting, lysosomal V1 subunit F	0.100462	7.19037	0.612211	0.438098	0.810105
ENSMUSG00000039105	ENSMUSG00000039105	66290	Atp6v1g1	ATPase, H+ transporting, lysosomal V1 subunit G1	0.165668	6.72853	2.19167	0.1458	0.594066
ENSMUSG00000024403	ENSMUSG00000024403	66237	Atp6v1g2	ATPase, H+ transporting, lysosomal V1 subunit G2	0.440626	1.21506	0.995684	0.323749	0.74018
ENSMUSG00000033793	ENSMUSG00000033793	108664	Atp6v1h	ATPase, H+ transporting, lysosomal V1 subunit H	-0.287941	4.84844	2.12454	0.152123	0.600161
ENSMUSG00000033792	ENSMUSG00000033792	11977	Atp7a	ATPase, Cu++ transporting, alpha polypeptide	0.0948139	2.83058	0.159726	0.69132	0.915042
ENSMUSG00000006567	ENSMUSG00000006567	11979	Atp7b	ATPase, Cu++ transporting, beta polypeptide	-0.42543	3.86222	2.65667	0.110596	0.548208
ENSMUSG00000064356	ENSMUSG00000064356	17706	ATP8	ATP synthase F0 subunit 8	0.0254026	8.30027	0.0240579	0.877439	0.966843
ENSMUSG00000037685	ENSMUSG00000037685	11980	Atp8a1	ATPase, aminophospholipid transporter (APLT), class I, type 8A, member 1	0.170758	2.63607	0.518092	0.475418	0.826143
ENSMUSG00000039529	ENSMUSG00000039529	54670	Atp8b1	ATPase, class I, type 8B, member 1	0.154314	4.92448	1.49237	0.228278	0.670624
ENSMUSG00000060131	ENSMUSG00000060131	241633	Atp8b4	ATPase, class I, type 8B, member 4	-0.17963	0.995267	0.157458	0.693404	0.915483
ENSMUSG00000027546	ENSMUSG00000027546	11981	Atp9a	ATPase, class II, type 9A	-0.0808301	6.33579	0.224214	0.638195	0.895377
ENSMUSG00000024566	ENSMUSG00000024566	50771	Atp9b	ATPase, class II, type 9B	0.119013	4.58594	0.870114	0.355954	0.763084
ENSMUSG00000028710	ENSMUSG00000028710	230649	Atpaf1	ATP synthase mitochondrial F1 complex assembly factor 1	-0.137088	3.95614	0.782563	0.38111	0.779238
ENSMUSG00000042709	ENSMUSG00000042709	246782	Atpaf2	ATP synthase mitochondrial F1 complex assembly factor 2	-0.21984	2.62562	0.89564	0.349061	0.758877
ENSMUSG00000054428	ENSMUSG00000054428	11983	Atpif1	ATPase inhibitory factor 1	-0.202806	5.35063	2.67305	0.109111	0.544594
ENSMUSG00000039065	ENSMUSG00000039065	68073	Atpsckmt	ATP synthase C subunit lysine N-methyltransferase	0.32669	3.7141	4.98244	0.0306829	0.347776
ENSMUSG00000032409	ENSMUSG00000032409	245000	Atr	ataxia telangiectasia and Rad3 related	-0.0725667	3.48823	0.168472	0.683442	0.91189
ENSMUSG00000013622	ENSMUSG00000013622	381629	Atraid	all-trans retinoic acid induced differentiation factor	-0.0871276	6.65315	0.743179	0.393263	0.782952
ENSMUSG00000025646	ENSMUSG00000025646	235610	Atrip	ATR interacting protein	0.412662	2.44329	2.76569	0.103329	0.53289
ENSMUSG00000027312	ENSMUSG00000027312	11990	Atrn	attractin	0.0905279	4.91567	0.178705	0.674637	0.909203
ENSMUSG00000054843	ENSMUSG00000054843	226255	Atrnl1	attractin like 1	0.0273312	3.37298	0.0234187	0.879065	0.967075
ENSMUSG00000031229	ENSMUSG00000031229	22589	Atrx	ATRX, chromatin remodeler	0.237466	6.45679	2.98999	0.0907087	0.509064
ENSMUSG00000046876	ENSMUSG00000046876	20238	Atxn1	ataxin 1	-0.0734036	4.69306	0.184163	0.669889	0.908042
ENSMUSG00000016541	ENSMUSG00000016541	54138	Atxn10	ataxin 10	0.112552	5.68349	0.527771	0.471347	0.824475
ENSMUSG00000069895	ENSMUSG00000069895	52335	Atxn1l	ataxin 1-like	-0.0647813	2.71312	0.0821065	0.775792	0.940066
ENSMUSG00000042605	ENSMUSG00000042605	20239	Atxn2	ataxin 2	0.256248	6.87655	4.59294	0.0376053	0.367194
ENSMUSG00000032637	ENSMUSG00000032637	233871	Atxn2l	ataxin 2-like	0.257913	3.36071	1.58366	0.214792	0.665228
ENSMUSG00000021189	ENSMUSG00000021189	110616	Atxn3	ataxin 3	-0.134072	3.78251	0.729152	0.397729	0.786757
ENSMUSG00000021738	ENSMUSG00000021738	246103	Atxn7	ataxin 7	0.143413	4.91978	1.29796	0.260678	0.689575
ENSMUSG00000020564	ENSMUSG00000020564	380753	Atxn7l1	ataxin 7-like 1	-0.0138503	3.32343	0.00584127	0.939421	0.984142
ENSMUSG00000059995	ENSMUSG00000059995	217218	Atxn7l3	ataxin 7-like 3	0.528296	4.96333	7.33879	0.00960682	0.222983
ENSMUSG00000074748	ENSMUSG00000074748	382423	Atxn7l3b	ataxin 7-like 3B	-0.103708	8.13254	0.545141	0.464184	0.821154
ENSMUSG00000078584	ENSMUSG00000078584	230696	AU022252	expressed sequence AU022252	0.214615	5.76632	2.97583	0.091452	0.509064
ENSMUSG00000028830	ENSMUSG00000028830	100317	AU040320	expressed sequence AU040320	-0.22555	4.41683	3.46155	0.0694231	0.464013
ENSMUSG00000078435	ENSMUSG00000078435	216177	AU041133	expressed sequence AU041133	0.253004	0.940614	0.405699	0.527422	0.847697
ENSMUSG00000021460	ENSMUSG00000021460	11992	Auh	AU RNA binding protein/enoyl-coenzyme A hydratase	-0.251422	5.28861	6.27913	0.0159424	0.273615
ENSMUSG00000068328	ENSMUSG00000068328	11993	Aup1	ancient ubiquitous protein 1	0.206479	6.57992	2.28419	0.137763	0.584803
ENSMUSG00000027496	ENSMUSG00000027496	20878	Aurka	aurora kinase A	-0.768824	0.770487	2.29182	0.137123	0.584803
ENSMUSG00000065990	ENSMUSG00000065990	66077	Aurkaip1	aurora kinase A interacting protein 1	-0.0686017	5.63292	0.347994	0.558233	0.857184
ENSMUSG00000029673	ENSMUSG00000029673	319974	Auts2	autism susceptibility candidate 2	0.642965	1.52047	2.62183	0.112465	0.551974
ENSMUSG00000003604	ENSMUSG00000003604	74268	Aven	apoptosis, caspase activation inhibitor	0.125589	4.03256	0.684983	0.41229	0.794584
ENSMUSG00000029787	ENSMUSG00000029787	78937	Avl9	AVL9 cell migration associated	-0.0952958	4.25293	0.273132	0.603829	0.87927
ENSMUSG00000018821	ENSMUSG00000018821	69534	Avpi1	arginine vasopressin-induced 1	0.317239	4.87519	3.73398	0.0596931	0.443378
ENSMUSG00000020123	ENSMUSG00000020123	54140	Avpr1a	arginine vasopressin receptor 1A	1.03212	3.19318	8.26657	0.00641922	0.186939
ENSMUSG00000075010	ENSMUSG00000075010	107350	AW112010	expressed sequence AW112010	-0.309609	6.73777	2.48595	0.122426	0.568838
ENSMUSG00000074166	ENSMUSG00000074166	101835	AW146154	expressed sequence AW146154	0.0738182	3.31569	0.124535	0.725832	0.925765
ENSMUSG00000039182	ENSMUSG00000039182	105351	AW209491	expressed sequence AW209491	-0.114893	3.59242	0.389468	0.535764	0.850896
ENSMUSG00000087516	ENSMUSG00000087516	100993	AW549542	expressed sequence AW549542	0.0914121	3.25756	0.0724184	0.789211	0.942831
ENSMUSG00000041935	ENSMUSG00000041935	106064	AW549877	expressed sequence AW549877	-0.129434	3.87683	0.373883	0.544005	0.85328
ENSMUSG00000033632	ENSMUSG00000033632	225289	AW554918	expressed sequence AW554918	-0.443122	2.21956	1.72453	0.195838	0.649308
ENSMUSG00000024182	ENSMUSG00000024182	12005	Axin1	axin 1	0.342136	3.55142	4.57392	0.0379841	0.367562
ENSMUSG00000000142	ENSMUSG00000000142	12006	Axin2	axin 2	0.0420858	2.26976	0.0204217	0.88701	0.969073
ENSMUSG00000002602	ENSMUSG00000002602	26362	Axl	AXL receptor tyrosine kinase	0.370979	4.50303	2.80959	0.101047	0.530607
ENSMUSG00000037053	ENSMUSG00000037053	12007	Azgp1	alpha-2-glycoprotein 1, zinc	0.107035	9.86599	0.764665	0.386565	0.780556
ENSMUSG00000039285	ENSMUSG00000039285	27215	Azi2	5-azacytidine induced gene 2	-0.128598	4.5088	0.655076	0.422608	0.799663
ENSMUSG00000037458	ENSMUSG00000037458	54375	Azin1	antizyme inhibitor 1	-0.0110766	5.86024	0.0064372	0.936412	0.982233
ENSMUSG00000060802	ENSMUSG00000060802	12010	B2m	beta-2 microglobulin	-0.149143	11.6409	1.06616	0.307389	0.728112
ENSMUSG00000039242	ENSMUSG00000039242	97884	B3galnt2	UDP-GalNAc:betaGlcNAc beta 1,3-galactosaminyltransferase, polypeptide 2	-0.425297	2.63276	1.20386	0.278893	0.70621
ENSMUSG00000034780	ENSMUSG00000034780	26877	B3galt1	UDP-Gal:betaGlcNAc beta 1,3-galactosyltransferase, polypeptide 1	0.28318	3.37498	2.04216	0.15997	0.609579
ENSMUSG00000050796	ENSMUSG00000050796	117592	B3galt6	UDP-Gal:betaGal beta 1,3-galactosyltransferase, polypeptide 6	0.54516	1.4459	2.04268	0.159918	0.609579
ENSMUSG00000071649	ENSMUSG00000071649	72727	B3gat3	beta-1,3-glucuronyltransferase 3 (glucuronosyltransferase I)	0.185742	3.83126	1.34357	0.252583	0.683781
ENSMUSG00000051950	ENSMUSG00000051950	381694	B3glct	beta-3-glucosyltransferase	-0.119147	1.75192	0.184133	0.669914	0.908042
ENSMUSG00000006731	ENSMUSG00000006731	14421	B4galnt1	beta-1,4-N-acetyl-galactosaminyl transferase 1	0.27358	5.44616	3.25018	0.0781857	0.48326
ENSMUSG00000028413	ENSMUSG00000028413	14595	B4galt1	UDP-Gal:betaGlcNAc beta 1,4- galactosyltransferase, polypeptide 1	0.234195	5.45237	2.07331	0.15689	0.606839
ENSMUSG00000052423	ENSMUSG00000052423	57370	B4galt3	UDP-Gal:betaGlcNAc beta 1,4-galactosyltransferase, polypeptide 3	0.200387	3.35545	0.988869	0.325392	0.740755
ENSMUSG00000017929	ENSMUSG00000017929	56336	B4galt5	UDP-Gal:betaGlcNAc beta 1,4-galactosyltransferase, polypeptide 5	-0.158393	4.12677	0.489894	0.487738	0.830691
ENSMUSG00000056124	ENSMUSG00000056124	56386	B4galt6	UDP-Gal:betaGlcNAc beta 1,4-galactosyltransferase, polypeptide 6	0.68757	1.39763	2.32159	0.134661	0.583784
ENSMUSG00000021504	ENSMUSG00000021504	218271	B4galt7	xylosylprotein beta1,4-galactosyltransferase, polypeptide 7 (galactosyltransferase I)	0.298239	2.4116	1.55168	0.219402	0.666758
ENSMUSG00000063439	ENSMUSG00000063439	232987	B9d2	B9 protein domain 2	0.0834985	2.04794	0.079606	0.779139	0.94016
ENSMUSG00000039653	ENSMUSG00000039653	12012	Baat	bile acid-Coenzyme A: amino acid N-acyltransferase	-0.168036	7.05958	1.49256	0.228249	0.670624
ENSMUSG00000031820	ENSMUSG00000031820	68251	Babam1	BRISC and BRCA1 A complex member 1	0.0395583	5.16316	0.133423	0.716638	0.923174
ENSMUSG00000052139	ENSMUSG00000052139	107976	Babam2	BRISC and BRCA1 A complex member 2	0.205184	4.67069	1.52241	0.223728	0.66799
ENSMUSG00000032086	ENSMUSG00000032086	23821	Bace1	beta-site APP cleaving enzyme 1	0.132617	5.06517	1.20593	0.278043	0.705304
ENSMUSG00000040605	ENSMUSG00000040605	56175	Bace2	beta-site APP-cleaving enzyme 2	-0.124126	2.92353	0.387904	0.53658	0.851498
ENSMUSG00000025612	ENSMUSG00000025612	12013	Bach1	BTB and CNC homology 1, basic leucine zipper transcription factor 1	0.0336187	4.22505	0.0401687	0.842064	0.957156
ENSMUSG00000040270	ENSMUSG00000040270	12014	Bach2	BTB and CNC homology, basic leucine zipper transcription factor 2	0.0806018	3.82093	0.136069	0.713969	0.92249
ENSMUSG00000024959	ENSMUSG00000024959	12015	Bad	BCL2-associated agonist of cell death	0.113969	4.8162	0.602004	0.441916	0.810722
ENSMUSG00000028416	ENSMUSG00000028416	12017	Bag1	BCL2-associated athanogene 1	-0.00105464	5.52355	3.37044e-05	0.995394	0.99811
ENSMUSG00000030847	ENSMUSG00000030847	29810	Bag3	BCL2-associated athanogene 3	-0.128906	4.13414	0.604553	0.440958	0.810722
ENSMUSG00000037316	ENSMUSG00000037316	67384	Bag4	BCL2-associated athanogene 4	0.222887	5.59342	4.30136	0.043895	0.390698
ENSMUSG00000049792	ENSMUSG00000049792	70369	Bag5	BCL2-associated athanogene 5	0.0244849	3.32816	0.0200853	0.887938	0.969073
ENSMUSG00000024392	ENSMUSG00000024392	224727	Bag6	BCL2-associated athanogene 6	0.15015	5.08932	1.19698	0.279809	0.707976
ENSMUSG00000039741	ENSMUSG00000039741	268515	Bahcc1	BAH domain and coiled-coil containing 1	-0.3804	1.51403	1.188	0.281596	0.708208
ENSMUSG00000040007	ENSMUSG00000040007	228536	Bahd1	bromo adjacent homology domain containing 1	-0.115236	2.46297	0.174924	0.677782	0.910791
ENSMUSG00000025372	ENSMUSG00000025372	108100	Baiap2	brain-specific angiogenesis inhibitor 1-associated protein 2	0.172315	4.9996	1.50383	0.226528	0.669432
ENSMUSG00000038859	ENSMUSG00000038859	66898	Baiap2l1	BAI1-associated protein 2-like 1	0.446475	4.55985	9.96735	0.00285826	0.128966
ENSMUSG00000057789	ENSMUSG00000057789	12018	Bak1	BCL2-antagonist/killer 1	0.454215	2.24703	2.40891	0.127725	0.577987
ENSMUSG00000024232	ENSMUSG00000024232	68010	Bambi	BMP and activin membrane-bound inhibitor	-0.0586866	2.00963	0.0164349	0.898604	0.972142
ENSMUSG00000024844	ENSMUSG00000024844	23825	Banf1	barrier to autointegration factor 1	-0.0304666	5.54467	0.0468279	0.829666	0.954767
ENSMUSG00000037922	ENSMUSG00000037922	242248	Bank1	B cell scaffold protein with ankyrin repeats 1	-0.069008	1.8189	0.0524292	0.819937	0.951652
ENSMUSG00000025316	ENSMUSG00000025316	53325	Banp	BTG3 associated nuclear protein	0.291857	4.12434	4.256	0.0449726	0.393049
ENSMUSG00000021901	ENSMUSG00000021901	104416	Bap1	Brca1 associated protein 1	-0.00881672	3.43659	0.00234094	0.961627	0.991457
ENSMUSG00000045763	ENSMUSG00000045763	70350	Basp1	brain abundant, membrane attached signal protein 1	0.151071	3.1064	0.263992	0.610023	0.882082
ENSMUSG00000003873	ENSMUSG00000003873	12028	Bax	BCL2-associated X protein	0.252731	1.59859	0.637656	0.428799	0.804588
ENSMUSG00000035021	ENSMUSG00000035021	217578	Baz1a	bromodomain adjacent to zinc finger domain 1A	0.0546256	4.62582	0.164929	0.686603	0.913385
ENSMUSG00000002748	ENSMUSG00000002748	22385	Baz1b	bromodomain adjacent to zinc finger domain, 1B	0.19516	5.75291	1.53433	0.221955	0.667663
ENSMUSG00000040054	ENSMUSG00000040054	116848	Baz2a	bromodomain adjacent to zinc finger domain, 2A	0.215175	5.04707	1.67541	0.202208	0.655828
ENSMUSG00000026987	ENSMUSG00000026987	407823	Baz2b	bromodomain adjacent to zinc finger domain, 2B	0.274685	5.36149	4.42848	0.0410223	0.37932
ENSMUSG00000002083	ENSMUSG00000002083	170770	Bbc3	BCL2 binding component 3	0.22127	3.68171	1.10841	0.298107	0.721124
ENSMUSG00000084957	ENSMUSG00000084957	100503572	Bbip1	BBSome interacting protein 1	0.096085	4.67505	0.56183	0.457466	0.817609
ENSMUSG00000041660	ENSMUSG00000041660	170442	Bbox1	butyrobetaine (gamma), 2-oxoglutarate dioxygenase 1 (gamma-butyrobetaine hydroxylase)	-0.471561	7.38417	6.38879	0.0153039	0.269535
ENSMUSG00000035759	ENSMUSG00000035759	71769	Bbs10	Bardet-Biedl syndrome 10 (human)	-0.301288	2.32986	1.09078	0.301935	0.723937
ENSMUSG00000031755	ENSMUSG00000031755	67378	Bbs2	Bardet-Biedl syndrome 2 (human)	-0.58694	0.72925	2.07782	0.156449	0.605773
ENSMUSG00000025235	ENSMUSG00000025235	102774	Bbs4	Bardet-Biedl syndrome 4 (human)	0.507923	1.81914	3.12848	0.0837853	0.494137
ENSMUSG00000037325	ENSMUSG00000037325	71492	Bbs7	Bardet-Biedl syndrome 7 (human)	-0.00977382	0.859381	0.000385607	0.984421	0.996593
ENSMUSG00000035919	ENSMUSG00000035919	319845	Bbs9	Bardet-Biedl syndrome 9 (human)	-0.590522	1.50014	2.7038	0.107152	0.543115
ENSMUSG00000022641	ENSMUSG00000022641	70508	Bbx	bobby sox HMG box containing	0.305464	4.32526	3.1001	0.0851545	0.497053
ENSMUSG00000115783	ENSMUSG00000115783	100568459	Bc1	brain cytoplasmic RNA 1	0.528861	1.85885	2.24277	0.141296	0.58912
ENSMUSG00000020650	ENSMUSG00000020650	12033	Bcap29	B cell receptor associated protein 29	-0.248582	2.91139	1.58965	0.213943	0.665228
ENSMUSG00000002015	ENSMUSG00000002015	27061	Bcap31	B cell receptor associated protein 31	-0.114946	6.78903	1.97583	0.16677	0.61664
ENSMUSG00000031955	ENSMUSG00000031955	12927	Bcar1	breast cancer anti-estrogen resistance 1	-0.30647	5.0861	1.95336	0.16963	0.621514
ENSMUSG00000028121	ENSMUSG00000028121	29815	Bcar3	breast cancer anti-estrogen resistance 3	-0.0546283	4.46528	0.052635	0.819662	0.951652
ENSMUSG00000005687	ENSMUSG00000005687	68183	Bcas2	breast carcinoma amplified sequence 2	0.136587	4.22513	0.707666	0.404715	0.790119
ENSMUSG00000059439	ENSMUSG00000059439	192197	Bcas3	breast carcinoma amplified sequence 3	0.0412932	4.11621	0.0373372	0.847667	0.957378
ENSMUSG00000030826	ENSMUSG00000030826	12036	Bcat2	branched chain aminotransferase 2, mitochondrial	0.10277	2.53464	0.168901	0.683061	0.91189
ENSMUSG00000030983	ENSMUSG00000030983	66165	Bccip	BRCA2 and CDKN1A interacting protein	0.207481	4.64556	0.837509	0.365338	0.768602
ENSMUSG00000037525	ENSMUSG00000037525	75284	Bcdin3d	BCDIN3 domain containing	-0.177408	2.2592	0.541501	0.46567	0.822162
ENSMUSG00000027792	ENSMUSG00000027792	12038	Bche	butyrylcholinesterase	-0.489673	6.11127	20.1356	5.04038e-05	0.00986173
ENSMUSG00000060376	ENSMUSG00000060376	12039	Bckdha	branched chain ketoacid dehydrogenase E1, alpha polypeptide	-0.0236939	6.63568	0.0328656	0.856964	0.960751
ENSMUSG00000032263	ENSMUSG00000032263	12040	Bckdhb	branched chain ketoacid dehydrogenase E1, beta polypeptide	-0.0416251	5.82332	0.0948192	0.759574	0.934572
ENSMUSG00000030802	ENSMUSG00000030802	12041	Bckdk	branched chain ketoacid dehydrogenase kinase	0.0327073	3.37739	0.035257	0.851911	0.959035
ENSMUSG00000028191	ENSMUSG00000028191	12042	Bcl10	B cell leukemia/lymphoma 10	-0.278682	4.20099	1.60586	0.211831	0.664527
ENSMUSG00000057329	ENSMUSG00000057329	12043	Bcl2	B cell leukemia/lymphoma 2	0.179852	2.36199	0.484848	0.489853	0.831612
ENSMUSG00000089929	ENSMUSG00000089929	12045	Bcl2a1b	B cell leukemia/lymphoma 2 related protein A1b	0.449127	1.81176	0.864581	0.357742	0.764166
ENSMUSG00000099974	ENSMUSG00000099974	12047	Bcl2a1d	B cell leukemia/lymphoma 2 related protein A1d	0.046631	1.81808	0.0108546	0.917503	0.97727
ENSMUSG00000007659	ENSMUSG00000007659	12048	Bcl2l1	BCL2-like 1	0.0907487	4.48619	0.277848	0.600732	0.877134
ENSMUSG00000027381	ENSMUSG00000027381	12125	Bcl2l11	BCL2-like 11 (apoptosis facilitator)	-0.13284	3.41673	0.434219	0.513319	0.842818
ENSMUSG00000003190	ENSMUSG00000003190	75736	Bcl2l12	BCL2-like 12 (proline rich)	-0.80672	1.90891	6.15891	0.0169179	0.277997
ENSMUSG00000009112	ENSMUSG00000009112	94044	Bcl2l13	BCL2-like 13 (apoptosis facilitator)	-0.0206054	5.05361	0.0386636	0.845011	0.957175
ENSMUSG00000030200	ENSMUSG00000030200	66813	Bcl2l14	BCL2-like 14 (apoptosis facilitator)	-0.726829	0.615766	2.36974	0.130785	0.581337
ENSMUSG00000089682	ENSMUSG00000089682	12050	Bcl2l2	BCL2-like 2	-0.0614908	2.11276	0.0520424	0.820591	0.951652
ENSMUSG00000053175	ENSMUSG00000053175	12051	Bcl3	B cell leukemia/lymphoma 3	0.187563	3.91169	0.813776	0.37186	0.772427
ENSMUSG00000022508	ENSMUSG00000022508	12053	Bcl6	B cell leukemia/lymphoma 6	0.0743778	5.10399	0.0278418	0.868416	0.9642
ENSMUSG00000000317	ENSMUSG00000000317	12029	Bcl6b	B cell CLL/lymphoma 6, member B	0.27657	1.03852	0.650288	0.424296	0.800745
ENSMUSG00000029438	ENSMUSG00000029438	77045	Bcl7a	B cell CLL/lymphoma 7A	0.13757	3.17326	0.364143	0.549276	0.854617
ENSMUSG00000029681	ENSMUSG00000029681	12054	Bcl7b	B cell CLL/lymphoma 7B	-0.121095	3.30169	0.369241	0.546505	0.85328
ENSMUSG00000030814	ENSMUSG00000030814	12055	Bcl7c	B cell CLL/lymphoma 7C	-0.324269	4.73725	3.74178	0.0594376	0.442942
ENSMUSG00000038256	ENSMUSG00000038256	77578	Bcl9	B cell CLL/lymphoma 9	0.266678	2.72449	2.03312	0.160878	0.609579
ENSMUSG00000063382	ENSMUSG00000063382	80288	Bcl9l	B cell CLL/lymphoma 9-like	0.256614	5.86069	2.87642	0.0968673	0.522632
ENSMUSG00000037608	ENSMUSG00000037608	72567	Bclaf1	BCL2-associated transcription factor 1	0.333897	6.2769	7.35348	0.00947614	0.222983
ENSMUSG00000044150	ENSMUSG00000044150	382252	Bclaf3	Bclaf1 and Thrap3 family member 3	0.0183062	1.86484	0.00233545	0.961672	0.991457
ENSMUSG00000031845	ENSMUSG00000031845	63857	Bco1	beta-carotene oxygenase 1	0.487121	2.52362	4.26706	0.0447071	0.393049
ENSMUSG00000032066	ENSMUSG00000032066	170752	Bco2	beta-carotene oxygenase 2	-0.266545	3.96492	2.26131	0.139702	0.587589
ENSMUSG00000040363	ENSMUSG00000040363	71458	Bcor	BCL6 interacting corepressor	0.536063	2.94568	4.84084	0.0330251	0.359699
ENSMUSG00000036959	ENSMUSG00000036959	320376	Bcorl1	BCL6 co-repressor-like 1	0.407476	3.92435	4.29219	0.0441106	0.391414
ENSMUSG00000009681	ENSMUSG00000009681	110279	Bcr	breakpoint cluster region	0.0506488	4.54381	0.112842	0.738509	0.93022
ENSMUSG00000026172	ENSMUSG00000026172	66821	Bcs1l	BCS1-like (yeast)	0.170027	3.48735	1.06272	0.308163	0.728234
ENSMUSG00000046598	ENSMUSG00000046598	71911	Bdh1	3-hydroxybutyrate dehydrogenase, type 1	-0.412538	8.30521	16.5503	0.000190797	0.0250386
ENSMUSG00000028167	ENSMUSG00000028167	69772	Bdh2	3-hydroxybutyrate dehydrogenase, type 2	-0.152957	4.00071	0.673184	0.416314	0.796098
ENSMUSG00000048482	ENSMUSG00000048482	12064	Bdnf	brain derived neurotrophic factor	-0.5984	1.65506	4.16018	0.0473451	0.401619
ENSMUSG00000049658	ENSMUSG00000049658	544971	Bdp1	B double prime 1, subunit of RNA polymerase III transcription initiation factor IIIB	0.277614	4.50688	3.17994	0.0813645	0.490461
ENSMUSG00000035086	ENSMUSG00000035086	56208	Becn1	beclin 1, autophagy related	-0.00463395	5.38708	0.00235813	0.961487	0.991457
ENSMUSG00000038214	ENSMUSG00000038214	331623	Bend3	BEN domain containing 3	0.310788	1.03057	0.278879	0.600148	0.877134
ENSMUSG00000048186	ENSMUSG00000048186	209645	Bend7	BEN domain containing 7	0.343699	3.68675	3.28418	0.0766968	0.478776
ENSMUSG00000032757	ENSMUSG00000032757	12068	Bet1	Bet1 golgi vesicular membrane trafficking protein	-0.301266	4.87462	1.53475	0.222547	0.667875
ENSMUSG00000025484	ENSMUSG00000025484	54399	Bet1l	Bet1 golgi vesicular membrane trafficking protein like	0.0858317	5.90194	0.436729	0.51211	0.842818
ENSMUSG00000079737	ENSMUSG00000079737	67118	Bfar	bifunctional apoptosis regulator	0.527674	1.10971	1.41578	0.240405	0.678743
ENSMUSG00000022684	ENSMUSG00000022684	67118	Bfar	bifunctional apoptosis regulator	-0.0531197	5.96776	0.194781	0.661103	0.906049
ENSMUSG00000031375	ENSMUSG00000031375	12111	Bgn	biglycan	0.593885	6.22051	5.37261	0.0258849	0.323141
ENSMUSG00000072964	ENSMUSG00000072964	70237	Bhlhb9	basic helix-loop-helix domain containing, class B9	-0.516731	1.36372	2.1751	0.147297	0.594666
ENSMUSG00000030103	ENSMUSG00000030103	20893	Bhlhe40	basic helix-loop-helix family, member e40	-0.267358	5.36903	1.51545	0.225276	0.668929
ENSMUSG00000030256	ENSMUSG00000030256	79362	Bhlhe41	basic helix-loop-helix family, member e41	0.696674	2.22207	2.33589	0.134102	0.582738
ENSMUSG00000074768	ENSMUSG00000074768	12116	Bhmt	betaine-homocysteine methyltransferase	-0.144822	11.4081	1.2512	0.269321	0.69869
ENSMUSG00000042118	ENSMUSG00000042118	64918	Bhmt2	betaine-homocysteine methyltransferase 2	-0.183961	7.31887	1.39731	0.243449	0.679697
ENSMUSG00000014329	ENSMUSG00000014329	83675	Bicc1	BicC family RNA binding protein 1	0.930298	3.81118	6.9177	0.0122372	0.247527
ENSMUSG00000037933	ENSMUSG00000037933	76895	Bicd2	BICD cargo adaptor 2	0.122672	3.2234	0.452568	0.504594	0.839435
ENSMUSG00000070808	ENSMUSG00000070808	243842	Bicra	BRD4 interacting chromatin remodeling complex associated protein	0.133617	1.09734	0.104733	0.747737	0.932841
ENSMUSG00000036568	ENSMUSG00000036568	210982	Bicral	BRD4 interacting chromatin remodeling complex associated protein like	0.0608094	3.68418	0.201433	0.655743	0.9034
ENSMUSG00000004446	ENSMUSG00000004446	12122	Bid	BH3 interacting domain death agonist	-0.307037	3.85234	1.20406	0.278914	0.70621
ENSMUSG00000016758	ENSMUSG00000016758	12124	Bik	BCL2-interacting killer	0.151005	2.51611	0.390418	0.535269	0.850812
ENSMUSG00000024381	ENSMUSG00000024381	30948	Bin1	bridging integrator 1	-0.0419872	3.31476	0.0529136	0.819122	0.951487
ENSMUSG00000098112	ENSMUSG00000098112	668218	Bin2	bridging integrator 2	-0.00142426	1.59591	1.29397e-05	0.997146	0.998714
ENSMUSG00000022089	ENSMUSG00000022089	57784	Bin3	bridging integrator 3	0.0402296	2.74565	0.0334692	0.855671	0.960054
ENSMUSG00000057367	ENSMUSG00000057367	11797	Birc2	baculoviral IAP repeat-containing 2	-0.127665	4.17151	0.804593	0.374548	0.773761
ENSMUSG00000032000	ENSMUSG00000032000	11796	Birc3	baculoviral IAP repeat-containing 3	-0.196601	2.81401	0.655226	0.422555	0.799663
ENSMUSG00000017716	ENSMUSG00000017716	11799	Birc5	baculoviral IAP repeat-containing 5	-0.167288	1.79828	0.149953	0.700452	0.918401
ENSMUSG00000024073	ENSMUSG00000024073	12211	Birc6	baculoviral IAP repeat-containing 6	0.0668545	6.48619	0.407909	0.526305	0.847327
ENSMUSG00000041684	ENSMUSG00000041684	246229	Bivm	basic, immunoglobulin-like variable motif containing	0.0200812	2.86975	0.00882728	0.925568	0.978873
ENSMUSG00000067787	ENSMUSG00000067787	53619	Blcap	bladder cancer associated protein	0.072687	4.65108	0.251403	0.618559	0.887509
ENSMUSG00000030528	ENSMUSG00000030528	12144	Blm	Bloom syndrome, RecQ like helicase	-0.267925	1.70933	0.550044	0.462194	0.820484
ENSMUSG00000020840	ENSMUSG00000020840	104184	Blmh	bleomycin hydrolase	-0.0994469	5.6855	0.373722	0.544091	0.85328
ENSMUSG00000061132	ENSMUSG00000061132	17060	Blnk	B cell linker	0.676141	1.73634	3.69033	0.0611452	0.447204
ENSMUSG00000090247	ENSMUSG00000090247	14533	Bloc1s1	biogenesis of lysosomal organelles complex-1, subunit 1	-0.545539	1.38159	2.34026	0.133142	0.582652
ENSMUSG00000057506	ENSMUSG00000057506	73689	Bloc1s2	biogenesis of lysosomal organelles complex-1, subunit 2	-0.469836	2.26987	3.3228	0.0750437	0.476004
ENSMUSG00000057667	ENSMUSG00000057667	232946	Bloc1s3	biogenesis of lysosomal organelles complex-1, subunit 3	-0.39336	1.28872	1.07191	0.306105	0.727152
ENSMUSG00000060708	ENSMUSG00000060708	117197	Bloc1s4	biogenesis of lysosomal organelles complex-1, subunit 4, cappuccino	-0.260849	3.68025	2.14255	0.150287	0.598567
ENSMUSG00000038982	ENSMUSG00000038982	17828	Bloc1s5	biogenesis of lysosomal organelles complex-1, subunit 5, muted	0.119819	4.67975	0.485644	0.489499	0.831492
ENSMUSG00000005804	ENSMUSG00000005804	18457	Bloc1s6	biogenesis of lysosomal organelles complex-1, subunit 6, pallidin	-0.383489	3.44066	3.50014	0.0679439	0.459839
ENSMUSG00000001999	ENSMUSG00000001999	109778	Blvra	biliverdin reductase A	-0.304028	3.48961	3.69531	0.0609775	0.447143
ENSMUSG00000040466	ENSMUSG00000040466	233016	Blvrb	biliverdin reductase B (flavin reductase (NADPH))	-0.376835	7.26632	12.129	0.00112518	0.0742824
ENSMUSG00000026577	ENSMUSG00000026577	66352	Blzf1	basic leucine zipper nuclear factor 1	0.350903	3.13908	4.02171	0.0510187	0.41454
ENSMUSG00000040093	ENSMUSG00000040093	171543	Bmf	BCL2 modifying factor	-0.0104828	1.97989	0.0011295	0.97334	0.994409
ENSMUSG00000026739	ENSMUSG00000026739	12151	Bmi1	Bmi1 polycomb ring finger oncogene	-0.195589	3.71813	1.25891	0.267871	0.697113
ENSMUSG00000022098	ENSMUSG00000022098	12153	Bmp1	bone morphogenetic protein 1	0.463223	5.48349	9.02228	0.00436533	0.158166
ENSMUSG00000030046	ENSMUSG00000030046	12154	Bmp10	bone morphogenetic protein 10	0.0573622	1.4327	0.0267286	0.870873	0.965235
ENSMUSG00000027358	ENSMUSG00000027358	12156	Bmp2	bone morphogenetic protein 2	0.199406	4.75289	1.20914	0.277413	0.704833
ENSMUSG00000034663	ENSMUSG00000034663	140780	Bmp2k	BMP2 inducible kinase	-0.179176	3.26466	0.878646	0.353629	0.762048
ENSMUSG00000021835	ENSMUSG00000021835	12159	Bmp4	bone morphogenetic protein 4	0.377192	2.55209	2.35091	0.132285	0.582485
ENSMUSG00000032179	ENSMUSG00000032179	12160	Bmp5	bone morphogenetic protein 5	-0.195586	2.72884	0.362161	0.550441	0.855226
ENSMUSG00000039004	ENSMUSG00000039004	12161	Bmp6	bone morphogenetic protein 6	0.149426	1.46372	0.149443	0.700909	0.918401
ENSMUSG00000008999	ENSMUSG00000008999	12162	Bmp7	bone morphogenetic protein 7	0.328215	0.991367	0.600159	0.442612	0.810722
ENSMUSG00000021796	ENSMUSG00000021796	12166	Bmpr1a	bone morphogenetic protein receptor, type 1A	-0.0820817	3.8105	0.278157	0.60053	0.877134
ENSMUSG00000067336	ENSMUSG00000067336	12168	Bmpr2	bone morphogenetic protein receptor, type II (serine/threonine kinase)	0.07596	4.87308	0.712755	0.403044	0.789327
ENSMUSG00000030138	ENSMUSG00000030138	213895	Bms1	BMS1, ribosome biogenesis factor	0.0146909	4.79365	0.0104123	0.919183	0.97727
ENSMUSG00000042742	ENSMUSG00000042742	101148	Bmt2	base methyltransferase of 25S rRNA 2	0.215863	3.78857	1.35154	0.251201	0.682694
ENSMUSG00000049086	ENSMUSG00000049086	107771	Bmyc	brain expressed myelocytomatosis oncogene	-0.0513778	2.66075	0.0359195	0.850543	0.957896
ENSMUSG00000024191	ENSMUSG00000024191	224630	Bnip1	BCL2/adenovirus E1B interacting protein 1	-0.119926	3.6606	0.458673	0.501749	0.837591
ENSMUSG00000011958	ENSMUSG00000011958	12175	Bnip2	BCL2/adenovirus E1B interacting protein 2	-0.214733	6.22883	5.44682	0.0241788	0.313369
ENSMUSG00000078566	ENSMUSG00000078566	12176	Bnip3	BCL2/adenovirus E1B interacting protein 3	0.161543	7.59376	1.51104	0.225437	0.668929
ENSMUSG00000022051	ENSMUSG00000022051	12177	Bnip3l	BCL2/adenovirus E1B interacting protein 3-like	-0.0836581	7.0273	0.312587	0.578898	0.868105
ENSMUSG00000044502	ENSMUSG00000044502	69556	Bod1	biorientation of chromosomes in cell division 1	0.061725	4.82842	0.240304	0.626394	0.890414
ENSMUSG00000061755	ENSMUSG00000061755	665775	Bod1l	biorientation of chromosomes in cell division 1-like	0.130609	5.59128	0.672349	0.416602	0.796137
ENSMUSG00000026278	ENSMUSG00000026278	51800	Bok	BCL2-related ovarian killer	0.24354	3.33302	1.04495	0.312196	0.731607
ENSMUSG00000015943	ENSMUSG00000015943	69168	Bola1	bolA-like 1 (E. coli)	0.0328813	4.81763	0.0645279	0.800647	0.946365
ENSMUSG00000047721	ENSMUSG00000047721	66162	Bola2	bolA-like 2 (E. coli)	0.102891	4.7142	0.652752	0.423426	0.80024
ENSMUSG00000045160	ENSMUSG00000045160	78653	Bola3	bolA-like 3 (E. coli)	-0.210735	6.74112	2.1931	0.145671	0.594066
ENSMUSG00000022557	ENSMUSG00000022557	12181	Bop1	block of proliferation 1	0.275141	3.328	1.67598	0.202133	0.655828
ENSMUSG00000042992	ENSMUSG00000042992	67774	Borcs5	BLOC-1 related complex subunit 5	-0.144456	3.02483	0.399209	0.530729	0.848576
ENSMUSG00000045176	ENSMUSG00000045176	71923	Borcs6	BLOC-1 related complex subunit 6	0.309029	3.9516	2.34588	0.132689	0.582485
ENSMUSG00000062376	ENSMUSG00000062376	66439	Borcs7	BLOC-1 related complex subunit 7	-0.44569	3.53881	6.14128	0.0170662	0.278486
ENSMUSG00000002345	ENSMUSG00000002345	72368	Borcs8	BLOC-1 related complex subunit 8	-0.0833596	3.55282	0.237103	0.628695	0.891689
ENSMUSG00000038871	ENSMUSG00000038871	12183	Bpgm	2,3-bisphosphoglycerate mutase	-0.196392	3.43887	1.20293	0.278633	0.705831
ENSMUSG00000038286	ENSMUSG00000038286	68021	Bphl	biphenyl hydrolase-like (serine hydrolase, breast epithelial mucin-associated antigen)	-0.405044	6.73511	6.1961	0.0166094	0.276251
ENSMUSG00000026617	ENSMUSG00000026617	23827	Bpnt1	bisphosphate 3'-nucleotidase 1	-0.307676	5.00782	1.18405	0.283319	0.708857
ENSMUSG00000040481	ENSMUSG00000040481	207165	Bptf	bromodomain PHD finger transcription factor	0.220457	6.16187	4.39973	0.0416536	0.382127
ENSMUSG00000002413	ENSMUSG00000002413	109880	Braf	Braf transforming gene	0.265475	4.30562	2.55513	0.11701	0.558626
ENSMUSG00000029458	ENSMUSG00000029458	72399	Brap	BRCA1 associated protein	0.487354	5.8099	18.3781	9.57491e-05	0.0153785
ENSMUSG00000000148	ENSMUSG00000000148	231841	Brat1	BRCA1-associated ATM activator 1	-0.261471	1.76248	0.59074	0.44619	0.812384
ENSMUSG00000041147	ENSMUSG00000041147	12190	Brca2	breast cancer 2, early onset	-0.103603	2.22274	0.140169	0.70989	0.921042
ENSMUSG00000031201	ENSMUSG00000031201	210766	Brcc3	BRCA1/BRCA2-containing complex, subunit 3	0.132034	3.63024	0.788038	0.379464	0.778052
ENSMUSG00000022387	ENSMUSG00000022387	223770	Brd1	bromodomain containing 1	0.194202	4.43447	2.43055	0.126071	0.574853
ENSMUSG00000024335	ENSMUSG00000024335	14312	Brd2	bromodomain containing 2	-0.0606294	6.72197	0.194917	0.660992	0.906049
ENSMUSG00000026918	ENSMUSG00000026918	67382	Brd3	bromodomain containing 3	0.1743	6.40889	2.28158	0.137983	0.584812
ENSMUSG00000024002	ENSMUSG00000024002	57261	Brd4	bromodomain containing 4	0.238267	5.96655	2.33833	0.133298	0.582738
ENSMUSG00000031660	ENSMUSG00000031660	26992	Brd7	bromodomain containing 7	-0.0140373	5.42741	0.0108648	0.917452	0.97727
ENSMUSG00000003778	ENSMUSG00000003778	78656	Brd8	bromodomain containing 8	0.11664	4.59131	0.709262	0.40419	0.789613
ENSMUSG00000057649	ENSMUSG00000057649	105246	Brd9	bromodomain containing 9	0.0224675	4.09662	0.0162157	0.899244	0.972148
ENSMUSG00000029279	ENSMUSG00000029279	114642	Brdt	bromodomain, testis-specific	-0.273329	1.08788	0.42286	0.518855	0.845391
ENSMUSG00000011158	ENSMUSG00000011158	72308	Brf1	BRF1, RNA polymerase III transcription initiation factor 90 kDa subunit	0.338289	2.90443	2.91152	0.0949155	0.517877
ENSMUSG00000031487	ENSMUSG00000031487	66653	Brf2	BRF2, RNA polymerase III transcription initiation factor 50kDa subunit	-0.163535	2.78896	0.564185	0.45653	0.816745
ENSMUSG00000047843	ENSMUSG00000047843	55950	Bri3	brain protein I3	0.24843	8.3795	2.28862	0.137392	0.584803
ENSMUSG00000037905	ENSMUSG00000037905	76809	Bri3bp	Bri3 binding protein	-0.0392574	4.82462	0.100766	0.752396	0.933317
ENSMUSG00000034329	ENSMUSG00000034329	237911	Brip1	BRCA1 interacting protein C-terminal helicase 1	-0.110473	2.07488	0.140911	0.709159	0.921042
ENSMUSG00000085208	ENSMUSG00000085208	74038	Brip1os	BRCA1 interacting protein C-terminal helicase 1, opposite strand	0.0589192	4.3553	0.127213	0.723024	0.924594
ENSMUSG00000022247	ENSMUSG00000022247	67832	Brix1	BRX1, biogenesis of ribosomes	-0.0240837	3.75996	0.0190946	0.890719	0.969751
ENSMUSG00000033940	ENSMUSG00000033940	101314	Brk1	BRICK1, SCAR/WAVE actin-nucleating complex subunit	0.0186457	5.49488	0.0349828	0.852481	0.959277
ENSMUSG00000012076	ENSMUSG00000012076	52592	Brms1l	breast cancer metastasis-suppressor 1-like	-0.420547	1.28636	0.823395	0.369074	0.771036
ENSMUSG00000046836	ENSMUSG00000046836	71678	Brox	BRO1 domain and CAAX motif containing	0.0974307	4.78219	0.634122	0.430073	0.805435
ENSMUSG00000001632	ENSMUSG00000001632	78783	Brpf1	bromodomain and PHD finger containing, 1	0.283402	3.36079	3.55235	0.065998	0.455259
ENSMUSG00000063952	ENSMUSG00000063952	268936	Brpf3	bromodomain and PHD finger containing, 3	-0.166277	3.57179	0.609805	0.438993	0.810319
ENSMUSG00000022914	ENSMUSG00000022914	93871	Brwd1	bromodomain and WD repeat domain containing 1	0.416329	5.4485	7.27362	0.00984372	0.222983
ENSMUSG00000063663	ENSMUSG00000063663	382236	Brwd3	bromodomain and WD repeat domain containing 3	0.433577	3.32873	5.88686	0.0193694	0.291995
ENSMUSG00000071657	ENSMUSG00000071657	14705	Bscl2	Berardinelli-Seip congenital lipodystrophy 2 (seipin)	-0.0663984	5.56656	0.1774	0.675643	0.909393
ENSMUSG00000040859	ENSMUSG00000040859	100383	Bsdc1	BSD domain containing 1	-0.346425	3.74694	1.67571	0.202554	0.655842
ENSMUSG00000023175	ENSMUSG00000023175	12215	Bsg	basigin	-0.055745	7.12653	0.123463	0.726966	0.926332
ENSMUSG00000046718	ENSMUSG00000046718	69550	Bst2	bone marrow stromal cell antigen 2	0.504592	5.10627	3.6172	0.0645897	0.451624
ENSMUSG00000040565	ENSMUSG00000040565	107182	Btaf1	B-TFIID TATA-box binding protein associated factor 1	0.161028	4.24639	0.858277	0.359215	0.764508
ENSMUSG00000025103	ENSMUSG00000025103	83962	Btbd1	BTB (POZ) domain containing 1	-0.290605	4.76855	5.74553	0.0207911	0.295943
ENSMUSG00000038187	ENSMUSG00000038187	68815	Btbd10	BTB (POZ) domain containing 10	-0.496349	1.43775	1.57275	0.216352	0.665379
ENSMUSG00000020042	ENSMUSG00000020042	74007	Btbd11	BTB (POZ) domain containing 11	0.733216	0.682229	1.49716	0.227545	0.670387
ENSMUSG00000003344	ENSMUSG00000003344	208198	Btbd2	BTB (POZ) domain containing 2	-0.203449	3.5134	1.68054	0.201531	0.655585
ENSMUSG00000062098	ENSMUSG00000062098	228662	Btbd3	BTB (POZ) domain containing 3	0.138994	2.1266	0.284643	0.596328	0.874738
ENSMUSG00000002803	ENSMUSG00000002803	399566	Btbd6	BTB (POZ) domain containing 6	0.212396	3.38557	1.40403	0.242336	0.679697
ENSMUSG00000041702	ENSMUSG00000041702	238386	Btbd7	BTB (POZ) domain containing 7	0.329563	4.20495	4.80753	0.0336037	0.359845
ENSMUSG00000062202	ENSMUSG00000062202	224671	Btbd9	BTB (POZ) domain containing 9	0.140956	4.57967	1.282	0.263589	0.691824
ENSMUSG00000082361	ENSMUSG00000082361	12223	Btc	betacellulin, epidermal growth factor family member	0.660962	2.36405	6.63972	0.0133609	0.254923
ENSMUSG00000021900	ENSMUSG00000021900	26363	Btd	biotinidase	0.3628	4.91349	9.05762	0.00429593	0.157777
ENSMUSG00000021660	ENSMUSG00000021660	218490	Btf3	basic transcription factor 3	0.062538	6.5363	0.357654	0.552842	0.855852
ENSMUSG00000028568	ENSMUSG00000028568	70533	Btf3l4	basic transcription factor 3-like 4	0.000698656	5.3337	4.06892e-05	0.994939	0.997999
ENSMUSG00000036478	ENSMUSG00000036478	12226	Btg1	B cell translocation gene 1, anti-proliferative	-0.401774	5.67393	2.32633	0.135388	0.584803
ENSMUSG00000020423	ENSMUSG00000020423	12227	Btg2	B cell translocation gene 2, anti-proliferative	-0.295211	3.18584	0.674114	0.416513	0.796109
ENSMUSG00000022863	ENSMUSG00000022863	12228	Btg3	B cell translocation gene 3	0.952667	1.38626	5.52472	0.0232415	0.308387
ENSMUSG00000040283	ENSMUSG00000040283	237754	Btnl9	butyrophilin-like 9	-0.362645	2.68783	3.27469	0.0771093	0.480471
ENSMUSG00000025217	ENSMUSG00000025217	12234	Btrc	beta-transducin repeat containing protein	-0.0437491	2.96266	0.0578676	0.811003	0.949454
ENSMUSG00000066979	ENSMUSG00000066979	12237	Bub3	BUB3 mitotic checkpoint protein	-0.0974181	4.98411	0.603416	0.441385	0.810722
ENSMUSG00000032077	ENSMUSG00000032077	215051	Bud13	BUD13 homolog	0.126208	2.10002	0.360947	0.551027	0.855518
ENSMUSG00000005378	ENSMUSG00000005378	66138	Bud23	BUD23, rRNA methyltransferase and ribosome maturation factor	-0.0621037	3.59087	0.151847	0.698634	0.917801
ENSMUSG00000038722	ENSMUSG00000038722	231889	Bud31	BUD31 homolog	-0.192648	5.24595	3.09575	0.0853666	0.497094
ENSMUSG00000023988	ENSMUSG00000023988	53414	Bysl	bystin-like	-0.0256616	3.15017	0.0105958	0.918476	0.97727
ENSMUSG00000051223	ENSMUSG00000051223	66882	Bzw1	basic leucine zipper and W2 domains 1	0.0588177	6.14683	0.375099	0.543353	0.85328
ENSMUSG00000020547	ENSMUSG00000020547	66912	Bzw2	basic leucine zipper and W2 domains 2	-0.0986677	3.4404	0.21521	0.644974	0.898446
ENSMUSG00000000581	ENSMUSG00000000581	57316	C1d	C1D nuclear receptor co-repressor	-0.165639	5.12901	1.04001	0.313327	0.732691
ENSMUSG00000042460	ENSMUSG00000042460	94192	C1galt1	core 1 synthase, glycoprotein-N-acetylgalactosamine 3-beta-galactosyltransferase, 1	-0.145381	4.52299	0.473696	0.49496	0.832841
ENSMUSG00000048970	ENSMUSG00000048970	59048	C1galt1c1	C1GALT1-specific chaperone 1	0.11153	3.08955	0.218621	0.642373	0.897529
ENSMUSG00000036887	ENSMUSG00000036887	12259	C1qa	complement component 1, q subcomponent, alpha polypeptide	0.568469	5.57959	7.88529	0.00752504	0.200935
ENSMUSG00000036905	ENSMUSG00000036905	12260	C1qb	complement component 1, q subcomponent, beta polypeptide	0.625021	5.28211	3.9193	0.055156	0.426792
ENSMUSG00000018446	ENSMUSG00000018446	12261	C1qbp	complement component 1, q subcomponent binding protein	-0.209131	6.93564	2.4794	0.122425	0.568838
ENSMUSG00000036896	ENSMUSG00000036896	12262	C1qc	complement component 1, q subcomponent, C chain	0.256422	5.48541	1.15121	0.28976	0.713353
ENSMUSG00000017446	ENSMUSG00000017446	56745	C1qtnf1	C1q and tumor necrosis factor related protein 1	0.526149	2.17696	3.51736	0.0672953	0.457579
ENSMUSG00000055172	ENSMUSG00000055172	50909	C1ra	complement component 1, r subcomponent A	0.216402	7.92633	2.00624	0.163611	0.61303
ENSMUSG00000098470	ENSMUSG00000098470	667277	C1rb	complement component 1, r subcomponent B	0.0670692	7.03272	0.0775927	0.782064	0.94037
ENSMUSG00000038527	ENSMUSG00000038527	232371	C1rl	complement component 1, r subcomponent-like	0.0358567	7.31523	0.112141	0.739293	0.930253
ENSMUSG00000038521	ENSMUSG00000038521	50908	C1s1	complement component 1, s subcomponent 1	-0.312911	8.08089	3.15616	0.0826543	0.492389
ENSMUSG00000079343	ENSMUSG00000079343	317677	C1s2	complement component 1, s subcomponent 2	-0.378593	2.75548	1.35719	0.250417	0.682694
ENSMUSG00000024371	ENSMUSG00000024371	12263	C2	complement component 2 (within H-2S)	0.286102	5.60222	5.63922	0.0219342	0.302307
ENSMUSG00000045975	ENSMUSG00000045975	207781	C2cd2	C2 calcium-dependent domain containing 2	-0.131894	6.55305	1.80422	0.18601	0.641349
ENSMUSG00000032120	ENSMUSG00000032120	71764	C2cd2l	C2 calcium-dependent domain containing 2-like	-0.0451349	4.83346	0.157369	0.693486	0.915483
ENSMUSG00000047248	ENSMUSG00000047248	277939	C2cd3	C2 calcium-dependent domain containing 3	0.177964	2.74312	0.712523	0.40312	0.789327
ENSMUSG00000091648	ENSMUSG00000091648	271944	C2cd4d	C2 calcium-dependent domain containing 4D	0.130062	1.48025	0.132595	0.71748	0.923174
ENSMUSG00000030279	ENSMUSG00000030279	74741	C2cd5	C2 calcium-dependent domain containing 5	-0.0972178	1.90989	0.0687842	0.794325	0.944131
ENSMUSG00000024164	ENSMUSG00000024164	12266	C3	complement component 3	0.430626	10.734	8.25093	0.00621743	0.186668
ENSMUSG00000040552	ENSMUSG00000040552	12267	C3ar1	complement component 3a receptor 1	0.253941	2.69667	0.639968	0.428047	0.804017
ENSMUSG00000015451	ENSMUSG00000015451	625018	C4a	complement component 4A (Rodgers blood group)	-0.0915397	7.19415	0.663617	0.419621	0.798082
ENSMUSG00000073418	ENSMUSG00000073418	12268	C4b	complement component 4B (Chido blood group)	0.022482	9.49942	0.0603945	0.807003	0.948551
ENSMUSG00000026405	ENSMUSG00000026405	12269	C4bp	complement component 4 binding protein	-0.149138	8.3127	1.2408	0.271294	0.699581
ENSMUSG00000022181	ENSMUSG00000022181	12274	C6	complement component 6	1.19121	6.84573	36.2379	3.80731e-07	0.000355566
ENSMUSG00000050390	ENSMUSG00000050390	97130	C77080	expressed sequence C77080	-0.0283168	5.29152	0.0200021	0.888198	0.969073
ENSMUSG00000046679	ENSMUSG00000046679	232196	C87436	expressed sequence C87436	-0.114512	2.95154	0.41812	0.521196	0.845771
ENSMUSG00000035031	ENSMUSG00000035031	230558	C8a	complement component 8, alpha polypeptide	0.744998	8.28073	24.3327	1.17469e-05	0.00395026
ENSMUSG00000029656	ENSMUSG00000029656	110382	C8b	complement component 8, beta polypeptide	1.76741	6.93983	51.6502	1.18895e-08	2.38913e-05
ENSMUSG00000015083	ENSMUSG00000015083	69379	C8g	complement component 8, gamma polypeptide	-0.161212	8.76605	1.60864	0.211274	0.664367
ENSMUSG00000022149	ENSMUSG00000022149	12279	C9	complement component 9	0.171521	8.4125	1.45219	0.234542	0.674612
ENSMUSG00000028300	ENSMUSG00000028300	73205	C9orf72	C9orf72, member of C9orf72-SMCR8 complex	0.00582597	3.23613	0.000636831	0.97998	0.996509
ENSMUSG00000028578	ENSMUSG00000028578	67770	Caap1	caspase activity and apoptosis inhibitor 1	0.216293	2.06176	0.567651	0.455159	0.815376
ENSMUSG00000036707	ENSMUSG00000036707	12283	Cab39	calcium binding protein 39	-0.101456	4.9973	1.04027	0.313269	0.732691
ENSMUSG00000021981	ENSMUSG00000021981	69008	Cab39l	calcium binding protein 39-like	-0.166094	5.17971	2.74003	0.104895	0.536747
ENSMUSG00000020196	ENSMUSG00000020196	104248	Cabin1	calcineurin binding protein 1	0.231671	3.99473	1.52863	0.2228	0.667875
ENSMUSG00000040957	ENSMUSG00000040957	63955	Cables1	CDK5 and Abl enzyme substrate 1	0.300924	1.96806	0.669958	0.417425	0.796388
ENSMUSG00000038990	ENSMUSG00000038990	252966	Cables2	CDK5 and Abl enzyme substrate 2	0.402182	4.05726	5.3335	0.0256155	0.321643
ENSMUSG00000015488	ENSMUSG00000015488	381356	Cacfd1	calcium channel flower domain containing 1	0.0761136	4.66752	0.352532	0.555688	0.856055
ENSMUSG00000028532	ENSMUSG00000028532	320508	Cachd1	cache domain containing 1	-0.0572172	1.1359	0.0208406	0.885866	0.968869
ENSMUSG00000034656	ENSMUSG00000034656	12286	Cacna1a	calcium channel, voltage-dependent, P/Q type, alpha 1A subunit	-0.385348	1.17489	1.03827	0.313728	0.732963
ENSMUSG00000015968	ENSMUSG00000015968	12289	Cacna1d	calcium channel, voltage-dependent, L type, alpha 1D subunit	1.00892	1.57017	6.46083	0.0145807	0.264146
ENSMUSG00000040118	ENSMUSG00000040118	12293	Cacna2d1	calcium channel, voltage-dependent, alpha2/delta subunit 1	0.0447032	1.02069	0.0139757	0.906426	0.974159
ENSMUSG00000034889	ENSMUSG00000034889	70312	Cactin	cactin, spliceosome C complex subunit	0.397806	3.04231	3.9138	0.054098	0.423073
ENSMUSG00000033417	ENSMUSG00000033417	78832	Cacul1	CDK2 associated, cullin domain 1	0.11422	5.5256	0.945807	0.336043	0.750521
ENSMUSG00000014226	ENSMUSG00000014226	12301	Cacybp	calcyclin binding protein	-0.103568	5.09526	0.535338	0.468205	0.82326
ENSMUSG00000013629	ENSMUSG00000013629	69719	Cad	carbamoyl-phosphate synthetase 2, aspartate transcarbamylase, and dihydroorotase	-0.0381106	1.88493	0.0124233	0.911753	0.975867
ENSMUSG00000032076	ENSMUSG00000032076	54725	Cadm1	cell adhesion molecule 1	0.279187	5.35106	6.64542	0.0133239	0.254693
ENSMUSG00000005338	ENSMUSG00000005338	94332	Cadm3	cell adhesion molecule 3	-0.0564479	1.74941	0.0390269	0.844294	0.957175
ENSMUSG00000017978	ENSMUSG00000017978	320405	Cadps2	Ca2+-dependent activator protein for secretion 2	0.162247	2.97764	0.789869	0.378916	0.777706
ENSMUSG00000023055	ENSMUSG00000023055	67488	Calcoco1	calcium binding and coiled coil domain 1	-0.164862	4.73558	0.424561	0.518373	0.845148
ENSMUSG00000059588	ENSMUSG00000059588	54598	Calcrl	calcitonin receptor-like	0.135129	3.79887	0.627588	0.432442	0.80692
ENSMUSG00000029761	ENSMUSG00000029761	109624	Cald1	caldesmon 1	0.0617001	8.74608	0.335412	0.565408	0.860953
ENSMUSG00000033033	ENSMUSG00000033033	72691	Calhm2	calcium homeostasis modulator family member 2	0.226967	0.973771	0.311068	0.579819	0.868518
ENSMUSG00000046031	ENSMUSG00000046031	215900	Calhm6	calcium homeostasis modulator family member 6	-0.202765	1.53049	0.199489	0.657298	0.903982
ENSMUSG00000001175	ENSMUSG00000001175	12313	Calm1	calmodulin 1	-0.24859	8.59854	7.55503	0.00861193	0.212066
ENSMUSG00000036438	ENSMUSG00000036438	12314	Calm2	calmodulin 2	-0.113036	6.87579	0.651722	0.423789	0.800516
ENSMUSG00000019370	ENSMUSG00000019370	12315	Calm3	calmodulin 3	-0.219246	5.47679	2.84226	0.0988109	0.527806
ENSMUSG00000060371	ENSMUSG00000060371	140904	Caln1	calneuron 1	0.0291711	2.21102	0.0111803	0.916266	0.97727
ENSMUSG00000003814	ENSMUSG00000003814	12317	Calr	calreticulin	-0.0219353	8.78895	0.0293385	0.864776	0.963175
ENSMUSG00000029767	ENSMUSG00000029767	12321	Calu	calumenin	-0.38073	5.54742	1.59244	0.214785	0.665228
ENSMUSG00000030272	ENSMUSG00000030272	52163	Camk1	calcium/calmodulin-dependent protein kinase I	0.20358	4.03145	1.39315	0.244141	0.679697
ENSMUSG00000039145	ENSMUSG00000039145	227541	Camk1d	calcium/calmodulin-dependent protein kinase ID	0.0269096	6.39479	0.0159791	0.900034	0.972221
ENSMUSG00000057897	ENSMUSG00000057897	12323	Camk2b	calcium/calmodulin-dependent protein kinase II, beta	-0.0995031	3.09508	0.194345	0.661457	0.906049
ENSMUSG00000053819	ENSMUSG00000053819	108058	Camk2d	calcium/calmodulin-dependent protein kinase II, delta	0.110223	3.65391	0.448609	0.506455	0.839435
ENSMUSG00000021820	ENSMUSG00000021820	12325	Camk2g	calcium/calmodulin-dependent protein kinase II gamma	-0.225068	2.68332	1.10871	0.298044	0.721124
ENSMUSG00000046447	ENSMUSG00000046447	66259	Camk2n1	calcium/calmodulin-dependent protein kinase II inhibitor 1	0.135755	7.93369	1.35166	0.251182	0.682694
ENSMUSG00000051146	ENSMUSG00000051146	73047	Camk2n2	calcium/calmodulin-dependent protein kinase II inhibitor 2	-0.15911	2.02198	0.401409	0.529604	0.848492
ENSMUSG00000029471	ENSMUSG00000029471	207565	Camkk2	calcium/calmodulin-dependent protein kinase kinase 2, beta	0.033964	4.05382	0.045827	0.831468	0.954826
ENSMUSG00000021501	ENSMUSG00000021501	12328	Caml	calcium modulating ligand	-0.163423	4.05215	1.18189	0.282822	0.70873
ENSMUSG00000026933	ENSMUSG00000026933	227634	Camsap1	calmodulin regulated spectrin-associated protein 1	0.18747	3.73785	1.51115	0.22542	0.668929
ENSMUSG00000041570	ENSMUSG00000041570	67886	Camsap2	calmodulin regulated spectrin-associated protein family, member 2	0.239912	3.73916	2.36981	0.130779	0.581337
ENSMUSG00000044433	ENSMUSG00000044433	69697	Camsap3	calmodulin regulated spectrin-associated protein family, member 3	-0.017212	3.54527	0.00955473	0.922571	0.97799
ENSMUSG00000014592	ENSMUSG00000014592	100072	Camta1	calmodulin binding transcription activator 1	-0.219732	2.2657	0.505243	0.480912	0.829223
ENSMUSG00000040712	ENSMUSG00000040712	216874	Camta2	calmodulin binding transcription activator 2	0.329882	3.6655	3.56302	0.0656079	0.454608
ENSMUSG00000020114	ENSMUSG00000020114	71902	Cand1	cullin associated and neddylation disassociated 1	0.145374	4.79239	1.86193	0.179259	0.630898
ENSMUSG00000025575	ENSMUSG00000025575	76025	Cant1	calcium activated nucleotidase 1	0.0607813	4.69487	0.163534	0.68786	0.913495
ENSMUSG00000020368	ENSMUSG00000020368	12330	Canx	calnexin	-0.0350563	7.65574	0.15483	0.695839	0.916474
ENSMUSG00000028656	ENSMUSG00000028656	12331	Cap1	CAP, adenylate cyclase-associated protein 1 (yeast)	0.104551	4.48666	0.440142	0.510474	0.841614
ENSMUSG00000056737	ENSMUSG00000056737	12332	Capg	capping protein (actin filament), gelsolin-like	-0.14134	0.999047	0.0727219	0.78866	0.942831
ENSMUSG00000024942	ENSMUSG00000024942	12333	Capn1	calpain 1	0.0617725	2.65809	0.0500224	0.824047	0.953913
ENSMUSG00000026270	ENSMUSG00000026270	23830	Capn10	calpain 10	-0.217668	3.59363	1.92437	0.17228	0.62421
ENSMUSG00000037326	ENSMUSG00000037326	50817	Capn15	calpain 15	0.270026	3.49848	2.17477	0.147326	0.594666
ENSMUSG00000026509	ENSMUSG00000026509	12334	Capn2	calpain 2	-0.254015	4.96975	4.03536	0.050643	0.413308
ENSMUSG00000021893	ENSMUSG00000021893	12339	Capn7	calpain 7	-0.485602	4.17722	6.32732	0.0155685	0.271089
ENSMUSG00000001794	ENSMUSG00000001794	12336	Capns1	calpain, small subunit 1	0.108251	6.81779	0.572807	0.453132	0.813641
ENSMUSG00000027184	ENSMUSG00000027184	53872	Caprin1	cell cycle associated protein 1	0.0765715	6.96292	0.270777	0.605389	0.879636
ENSMUSG00000030309	ENSMUSG00000030309	232560	Caprin2	caprin family member 2	-0.151245	1.28034	0.148926	0.701402	0.918401
ENSMUSG00000070372	ENSMUSG00000070372	12340	Capza1	capping protein (actin filament) muscle Z-line, alpha 1	-0.0961478	3.72026	0.276799	0.601418	0.877659
ENSMUSG00000015733	ENSMUSG00000015733	12343	Capza2	capping protein (actin filament) muscle Z-line, alpha 2	-0.183883	5.25963	1.62885	0.208479	0.660206
ENSMUSG00000028745	ENSMUSG00000028745	12345	Capzb	capping protein (actin filament) muscle Z-line, beta	-0.0815883	6.24732	0.264058	0.609887	0.882044
ENSMUSG00000027556	ENSMUSG00000027556	12346	Car1	carbonic anhydrase 1	-0.51223	2.36464	3.17164	0.0817496	0.490461
ENSMUSG00000038526	ENSMUSG00000038526	23831	Car14	carbonic anhydrase 14	-0.0420415	5.3683	0.0291301	0.865345	0.963175
ENSMUSG00000027562	ENSMUSG00000027562	12349	Car2	carbonic anhydrase 2	0.217551	1.82035	0.348221	0.558105	0.857109
ENSMUSG00000027559	ENSMUSG00000027559	12350	Car3	carbonic anhydrase 3	-0.495545	12.0585	10.0448	0.00276198	0.128966
ENSMUSG00000025317	ENSMUSG00000025317	12352	Car5a	carbonic anhydrase 5a, mitochondrial	-0.377447	5.02945	2.42514	0.127228	0.577101
ENSMUSG00000031373	ENSMUSG00000031373	56078	Car5b	carbonic anhydrase 5b, mitochondrial	-0.669703	1.08508	3.48739	0.0684289	0.461576
ENSMUSG00000031883	ENSMUSG00000031883	12354	Car7	carbonic anhydrase 7	-0.115051	0.980982	0.0915937	0.76357	0.935745
ENSMUSG00000041261	ENSMUSG00000041261	12319	Car8	carbonic anhydrase 8	-0.179504	5.90095	1.31439	0.257725	0.689037
ENSMUSG00000033170	ENSMUSG00000033170	105844	Card10	caspase recruitment domain family, member 10	0.0373576	3.30277	0.0558087	0.814331	0.950951
ENSMUSG00000037960	ENSMUSG00000037960	68480	Card19	caspase recruitment domain family, member 19	0.00583545	3.6087	0.00128021	0.971618	0.993942
ENSMUSG00000041849	ENSMUSG00000041849	239319	Card6	caspase recruitment domain family, member 6	-0.15708	2.97631	0.484616	0.489957	0.831612
ENSMUSG00000026017	ENSMUSG00000026017	241066	Carf	calcium response factor	0.195994	2.48259	0.508013	0.479719	0.829145
ENSMUSG00000008393	ENSMUSG00000008393	52502	Carhsp1	calcium regulated heat stable protein 1	-0.133141	6.02062	1.79831	0.186717	0.641937
ENSMUSG00000032185	ENSMUSG00000032185	59035	Carm1	coactivator-associated arginine methyltransferase 1	0.32053	3.55107	3.2958	0.0761954	0.478036
ENSMUSG00000021338	ENSMUSG00000021338	68732	Carmil1	capping protein regulator and myosin 1 linker 1	0.600664	2.59452	4.66746	0.0361598	0.364341
ENSMUSG00000024726	ENSMUSG00000024726	67383	Carnmt1	carnosine N-methyltransferase 1	-0.0692304	4.90592	0.221574	0.640141	0.896364
ENSMUSG00000075289	ENSMUSG00000075289	107239	Carns1	carnosine synthase 1	-0.277769	1.8846	0.965662	0.331074	0.746112
ENSMUSG00000010755	ENSMUSG00000010755	27267	Cars	cysteinyl-tRNA synthetase	-0.053377	4.06113	0.113864	0.737373	0.929924
ENSMUSG00000056228	ENSMUSG00000056228	71941	Cars2	cysteinyl-tRNA synthetase 2 (mitochondrial)(putative)	-0.146094	3.69096	1.02117	0.3177	0.735536
ENSMUSG00000078676	ENSMUSG00000078676	192160	Casc3	cancer susceptibility candidate 3	0.190114	4.23004	1.75736	0.191715	0.646732
ENSMUSG00000060227	ENSMUSG00000060227	319996	Casc4	cancer susceptibility candidate 4	0.0989774	2.07166	0.128409	0.72178	0.924432
ENSMUSG00000015189	ENSMUSG00000015189	213819	Casd1	CAS1 domain containing 1	0.156798	3.59706	1.0509	0.310836	0.730488
ENSMUSG00000031012	ENSMUSG00000031012	12361	Cask	calcium/calmodulin-dependent serine protein kinase (MAGUK family)	0.049479	3.39003	0.0802759	0.778237	0.94016
ENSMUSG00000034471	ENSMUSG00000034471	140721	Caskin2	CASK-interacting protein 2	-0.028128	2.52588	0.0168799	0.897213	0.971612
ENSMUSG00000025888	ENSMUSG00000025888	12362	Casp1	caspase 1	-0.055774	1.5617	0.0237676	0.878174	0.966843
ENSMUSG00000025887	ENSMUSG00000025887	12364	Casp12	caspase 12	0.611704	1.96471	2.89028	0.0960915	0.52119
ENSMUSG00000029863	ENSMUSG00000029863	12366	Casp2	caspase 2	0.0826268	1.73164	0.0802694	0.778246	0.94016
ENSMUSG00000031628	ENSMUSG00000031628	12367	Casp3	caspase 3	-0.0702596	3.8386	0.184449	0.669648	0.908042
ENSMUSG00000033538	ENSMUSG00000033538	12363	Casp4	caspase 4, apoptosis-related cysteine peptidase	-0.21463	1.50102	0.416274	0.522113	0.845771
ENSMUSG00000027997	ENSMUSG00000027997	12368	Casp6	caspase 6	0.12758	5.44362	0.711701	0.403389	0.789327
ENSMUSG00000025076	ENSMUSG00000025076	12369	Casp7	caspase 7	0.10127	3.32965	0.298097	0.587803	0.871381
ENSMUSG00000026029	ENSMUSG00000026029	12370	Casp8	caspase 8	0.192128	4.0264	0.791291	0.378515	0.777625
ENSMUSG00000028282	ENSMUSG00000028282	26885	Casp8ap2	caspase 8 associated protein 2	-0.0224845	3.0713	0.0130845	0.909445	0.975621
ENSMUSG00000028914	ENSMUSG00000028914	12371	Casp9	caspase 9	0.00348449	3.96043	0.000381109	0.984512	0.996593
ENSMUSG00000021585	ENSMUSG00000021585	12380	Cast	calpastatin	-0.0739426	5.37556	0.334764	0.565782	0.861036
ENSMUSG00000020424	ENSMUSG00000020424	71962	Castor1	cytosolic arginine sensor for mTORC1 subunit 1	0.374284	1.14592	0.715315	0.402207	0.789067
ENSMUSG00000015944	ENSMUSG00000015944	80909	Castor2	cytosolic arginine sensor for mTORC1 subunit 2	0.209242	1.78578	0.616185	0.436625	0.809532
ENSMUSG00000028977	ENSMUSG00000028977	69743	Casz1	castor zinc finger 1	0.0165326	1.33828	0.00226406	0.962262	0.991457
ENSMUSG00000027187	ENSMUSG00000027187	12359	Cat	catalase	-0.0520913	10.9167	0.208473	0.650187	0.900802
ENSMUSG00000033486	ENSMUSG00000033486	212670	Catsper2	cation channel, sperm associated 2	-0.412683	1.40749	1.63467	0.207682	0.660206
ENSMUSG00000007655	ENSMUSG00000007655	12389	Cav1	caveolin 1, caveolae protein	1.43417	1.10105	10.2774	0.00249297	0.126542
ENSMUSG00000000058	ENSMUSG00000000058	12390	Cav2	caveolin 2	0.2053	1.25624	0.348808	0.557775	0.856847
ENSMUSG00000004044	ENSMUSG00000004044	19285	Cavin1	caveolae associated 1	0.328276	4.21034	1.91348	0.173868	0.625776
ENSMUSG00000045954	ENSMUSG00000045954	20324	Cavin2	caveolae associated 2	-0.150209	4.4553	1.05667	0.309528	0.729471
ENSMUSG00000038533	ENSMUSG00000038533	12396	Cbfa2t2	CBFA2/RUNX1 translocation partner 2	-0.0945066	2.40956	0.114465	0.736707	0.929718
ENSMUSG00000006362	ENSMUSG00000006362	12398	Cbfa2t3	CBFA2/RUNX1 translocation partner 3	0.321728	3.30694	2.76664	0.103271	0.53289
ENSMUSG00000031885	ENSMUSG00000031885	12400	Cbfb	core binding factor beta	-0.00736866	3.87153	0.000985746	0.975097	0.994825
ENSMUSG00000034342	ENSMUSG00000034342	12402	Cbl	Casitas B-lineage lymphoma	0.117776	4.41448	0.540207	0.466201	0.822424
ENSMUSG00000022637	ENSMUSG00000022637	208650	Cblb	Casitas B-lineage lymphoma b	-0.0287361	2.6404	0.0157194	0.900789	0.972421
ENSMUSG00000040525	ENSMUSG00000040525	80794	Cblc	Casitas B-lineage lymphoma c	0.448671	3.25327	4.97179	0.0308526	0.348269
ENSMUSG00000020659	ENSMUSG00000020659	104836	Cbll1	Casitas B-lineage lymphoma-like 1	0.070225	3.85227	0.312339	0.579048	0.868129
ENSMUSG00000051483	ENSMUSG00000051483	12408	Cbr1	carbonyl reductase 1	-0.173453	5.9483	1.14321	0.290737	0.714238
ENSMUSG00000022947	ENSMUSG00000022947	109857	Cbr3	carbonyl reductase 3	-0.839621	1.64725	2.92835	0.0943265	0.516698
ENSMUSG00000031641	ENSMUSG00000031641	234309	Cbr4	carbonyl reductase 4	-0.213444	4.41091	2.0689	0.157322	0.607224
ENSMUSG00000024039	ENSMUSG00000024039	12411	Cbs	cystathionine beta-synthase	0.115237	8.11703	0.583817	0.44885	0.81298
ENSMUSG00000024878	ENSMUSG00000024878	226043	Cbwd1	COBW domain containing 1	-0.105881	1.98721	0.0981674	0.755503	0.933825
ENSMUSG00000018666	ENSMUSG00000018666	12412	Cbx1	chromobox 1	0.102483	6.32504	0.94723	0.335683	0.750059
ENSMUSG00000025577	ENSMUSG00000025577	12416	Cbx2	chromobox 2	-0.00119393	2.28338	2.17892e-05	0.996296	0.998293
ENSMUSG00000029836	ENSMUSG00000029836	12417	Cbx3	chromobox 3	0.15509	6.72216	2.69721	0.107568	0.543448
ENSMUSG00000039989	ENSMUSG00000039989	12418	Cbx4	chromobox 4	0.301115	4.38698	2.60339	0.113701	0.553291
ENSMUSG00000009575	ENSMUSG00000009575	12419	Cbx5	chromobox 5	0.25723	5.44621	6.54287	0.0140072	0.2604
ENSMUSG00000089715	ENSMUSG00000089715	494448	Cbx6	chromobox 6	0.20559	3.6001	0.804957	0.374441	0.773761
ENSMUSG00000053411	ENSMUSG00000053411	52609	Cbx7	chromobox 7	0.12528	3.00134	0.21726	0.643408	0.897529
ENSMUSG00000025578	ENSMUSG00000025578	30951	Cbx8	chromobox 8	0.174566	2.32907	0.283714	0.596925	0.8752
ENSMUSG00000022428	ENSMUSG00000022428	73739	Cby1	chibby family member 1, beta catenin antagonist	-0.432296	2.12914	2.45444	0.124273	0.570438
ENSMUSG00000036686	ENSMUSG00000036686	212139	Cc2d1a	coiled-coil and C2 domain containing 1A	0.017903	2.19185	0.00363676	0.952182	0.987972
ENSMUSG00000028582	ENSMUSG00000028582	319965	Cc2d1b	coiled-coil and C2 domain containing 1B	-0.305711	3.16617	2.52522	0.119115	0.562011
ENSMUSG00000039765	ENSMUSG00000039765	231214	Cc2d2a	coiled-coil and C2 domain containing 2A	-0.252037	3.2743	1.76023	0.19136	0.646629
ENSMUSG00000020074	ENSMUSG00000020074	67500	Ccar1	cell division cycle and apoptosis regulator 1	-0.107417	5.65364	0.856658	0.359665	0.764508
ENSMUSG00000046318	ENSMUSG00000046318	320924	Ccbe1	collagen and calcium binding EGF domains 1	-0.432333	1.6227	1.91014	0.173842	0.625776
ENSMUSG00000028461	ENSMUSG00000028461	622404	Ccdc107	coiled-coil domain containing 107	-0.228992	5.1248	2.52001	0.119486	0.562625
ENSMUSG00000042111	ENSMUSG00000042111	69668	Ccdc115	coiled-coil domain containing 115	-0.394963	3.94177	3.0444	0.0880136	0.505409
ENSMUSG00000020482	ENSMUSG00000020482	104479	Ccdc117	coiled-coil domain containing 117	0.279532	3.5113	3.20342	0.0802862	0.489218
ENSMUSG00000019659	ENSMUSG00000019659	72654	Ccdc12	coiled-coil domain containing 12	-0.00817371	4.63217	0.00457787	0.946359	0.98594
ENSMUSG00000034795	ENSMUSG00000034795	108811	Ccdc122	coiled-coil domain containing 122	-0.209178	2.87177	0.814008	0.371792	0.772427
ENSMUSG00000007721	ENSMUSG00000007721	234388	Ccdc124	coiled-coil domain containing 124	0.0649065	3.98562	0.132592	0.717483	0.923174
ENSMUSG00000048924	ENSMUSG00000048924	76041	Ccdc125	coiled-coil domain containing 125	0.614254	1.63023	5.84442	0.019785	0.294477
ENSMUSG00000021578	ENSMUSG00000021578	67433	Ccdc127	coiled-coil domain containing 127	0.0687923	3.77405	0.155412	0.695298	0.916363
ENSMUSG00000004994	ENSMUSG00000004994	67736	Ccdc130	coiled-coil domain containing 130	-0.113571	2.45307	0.219503	0.641704	0.897152
ENSMUSG00000068114	ENSMUSG00000068114	76457	Ccdc134	coiled-coil domain containing 134	-0.622778	1.39151	2.945	0.0930941	0.512902
ENSMUSG00000049957	ENSMUSG00000049957	67291	Ccdc137	coiled-coil domain containing 137	-0.354345	3.18996	3.31652	0.0753098	0.476004
ENSMUSG00000038010	ENSMUSG00000038010	76138	Ccdc138	coiled-coil domain containing 138	0.0419002	1.20949	0.0127002	0.910779	0.975621
ENSMUSG00000044033	ENSMUSG00000044033	545428	Ccdc141	coiled-coil domain containing 141	-0.179702	3.55062	0.76565	0.386262	0.780411
ENSMUSG00000036641	ENSMUSG00000036641	227933	Ccdc148	coiled-coil domain containing 148	0.928897	1.4783	7.4015	0.0092622	0.220235
ENSMUSG00000034303	ENSMUSG00000034303	245902	Ccdc15	coiled-coil domain containing 15	-0.274921	1.96211	0.577754	0.4512	0.813394
ENSMUSG00000039632	ENSMUSG00000039632	77609	Ccdc151	coiled-coil domain containing 151	0.453139	1.44338	1.43018	0.238064	0.67682
ENSMUSG00000051427	ENSMUSG00000051427	216516	Ccdc157	coiled-coil domain containing 157	-0.407351	3.33881	5.12773	0.0284653	0.339413
ENSMUSG00000075225	ENSMUSG00000075225	75973	Ccdc162	coiled-coil domain containing 162	-0.2434	2.78611	0.862125	0.358151	0.764166
ENSMUSG00000028689	ENSMUSG00000028689	68394	Ccdc163	coiled-coil domain containing 163	0.0213904	2.16209	0.00737462	0.93195	0.980986
ENSMUSG00000098176	ENSMUSG00000098176	223648	Ccdc166	coiled-coil domain containing 166	0.539179	1.17725	2.01271	0.162948	0.612958
ENSMUSG00000024018	ENSMUSG00000024018	68597	Ccdc167	coiled-coil domain containing 167	-0.188377	3.11278	0.84818	0.362031	0.766618
ENSMUSG00000034035	ENSMUSG00000034035	622665	Ccdc17	coiled-coil domain containing 17	-0.154128	1.22478	0.134693	0.715353	0.922911
ENSMUSG00000052407	ENSMUSG00000052407	320226	Ccdc171	coiled-coil domain containing 171	-0.103535	2.50154	0.20984	0.649121	0.900269
ENSMUSG00000034083	ENSMUSG00000034083	232236	Ccdc174	coiled-coil domain containing 174	0.33215	3.58208	4.40363	0.0415673	0.38166
ENSMUSG00000026578	ENSMUSG00000026578	74895	Ccdc181	coiled-coil domain containing 181	0.694969	2.85719	8.19924	0.00636829	0.186939
ENSMUSG00000035173	ENSMUSG00000035173	213993	Ccdc186	coiled-coil domain containing 186	-0.12664	3.69535	0.503224	0.481785	0.829223
ENSMUSG00000022701	ENSMUSG00000022701	212153	Ccdc191	coiled-coil domain containing 191	-0.102929	3.4445	0.284696	0.596293	0.874738
ENSMUSG00000031143	ENSMUSG00000031143	54638	Ccdc22	coiled-coil domain containing 22	-0.135095	2.68272	0.357814	0.552753	0.855852
ENSMUSG00000022035	ENSMUSG00000022035	67179	Ccdc25	coiled-coil domain containing 25	0.0524906	5.32557	0.132291	0.717789	0.923174
ENSMUSG00000059554	ENSMUSG00000059554	215814	Ccdc28a	coiled-coil domain containing 28A	-0.119531	3.96255	0.623095	0.434083	0.808022
ENSMUSG00000028795	ENSMUSG00000028795	66264	Ccdc28b	coiled coil domain containing 28B	0.245546	2.05834	0.787376	0.379663	0.778052
ENSMUSG00000026676	ENSMUSG00000026676	74186	Ccdc3	coiled-coil domain containing 3	0.529826	2.00637	1.7518	0.192503	0.64735
ENSMUSG00000028637	ENSMUSG00000028637	73332	Ccdc30	coiled-coil domain containing 30	0.179481	2.12065	0.64696	0.425475	0.802127
ENSMUSG00000039983	ENSMUSG00000039983	269336	Ccdc32	coiled-coil domain containing 32	-0.113951	3.2639	0.471824	0.495711	0.832841
ENSMUSG00000027160	ENSMUSG00000027160	68201	Ccdc34	coiled-coil domain containing 34	-0.0765812	3.09841	0.110132	0.741551	0.930918
ENSMUSG00000047220	ENSMUSG00000047220	434438	Ccdc36	coiled-coil domain containing 36	-0.155346	4.65436	0.222495	0.639873	0.896222
ENSMUSG00000020925	ENSMUSG00000020925	52715	Ccdc43	coiled-coil domain containing 43	-0.241598	3.09566	2.03438	0.160751	0.609579
ENSMUSG00000078622	ENSMUSG00000078622	67163	Ccdc47	coiled-coil domain containing 47	0.0972354	5.65956	0.862585	0.358024	0.764166
ENSMUSG00000038127	ENSMUSG00000038127	67501	Ccdc50	coiled-coil domain containing 50	0.118091	5.42012	0.865884	0.357115	0.763477
ENSMUSG00000025645	ENSMUSG00000025645	66658	Ccdc51	coiled-coil domain containing 51	-0.79536	2.23645	6.46442	0.0145551	0.264146
ENSMUSG00000075229	ENSMUSG00000075229	381045	Ccdc58	coiled-coil domain containing 58	-0.599965	4.93117	3.73365	0.0608516	0.446979
ENSMUSG00000019897	ENSMUSG00000019897	52713	Ccdc59	coiled-coil domain containing 59	0.0107201	4.64134	0.00648469	0.936179	0.982084
ENSMUSG00000048701	ENSMUSG00000048701	76551	Ccdc6	coiled-coil domain containing 6	-0.0895528	4.72545	0.173555	0.679068	0.911608
ENSMUSG00000074358	ENSMUSG00000074358	232933	Ccdc61	coiled-coil domain containing 61	0.0179875	1.47717	0.00264772	0.959192	0.990697
ENSMUSG00000046753	ENSMUSG00000046753	320234	Ccdc66	coiled-coil domain containing 66	-0.153217	2.91383	0.499206	0.48353	0.829294
ENSMUSG00000038903	ENSMUSG00000038903	381175	Ccdc68	coiled-coil domain containing 68	0.475385	1.21433	1.89326	0.175716	0.628873
ENSMUSG00000049305	ENSMUSG00000049305	72454	Ccdc71	coiled-coil domain containing 71	0.360667	3.78385	4.14134	0.0478275	0.401964
ENSMUSG00000090946	ENSMUSG00000090946	72123	Ccdc71l	coiled-coil domain containing 71 like	0.124888	2.24503	0.189396	0.665522	0.906428
ENSMUSG00000045106	ENSMUSG00000045106	211936	Ccdc73	coiled-coil domain containing 73	0.142971	1.48079	0.250474	0.619206	0.887586
ENSMUSG00000030177	ENSMUSG00000030177	67200	Ccdc77	coiled-coil domain containing 77	-0.0688834	2.69048	0.0738392	0.787083	0.942634
ENSMUSG00000041117	ENSMUSG00000041117	434130	Ccdc8	coiled-coil domain containing 8	1.05706	0.835236	3.31026	0.07565	0.477171
ENSMUSG00000022665	ENSMUSG00000022665	67896	Ccdc80	coiled-coil domain containing 80	0.276868	4.8661	0.551936	0.462273	0.820484
ENSMUSG00000079084	ENSMUSG00000079084	66396	Ccdc82	coiled-coil domain containing 82	-0.119607	2.87057	0.350152	0.55702	0.856338
ENSMUSG00000043923	ENSMUSG00000043923	382073	Ccdc84	coiled-coil domain containing 84	0.0877431	3.99672	0.286801	0.594943	0.874715
ENSMUSG00000095098	ENSMUSG00000095098	240514	Ccdc85b	coiled-coil domain containing 85B	-0.0500457	1.65633	0.0213367	0.884525	0.968495
ENSMUSG00000084883	ENSMUSG00000084883	668158	Ccdc85c	coiled-coil domain containing 85C	-0.320958	3.57551	2.20689	0.144442	0.592712
ENSMUSG00000024732	ENSMUSG00000024732	108673	Ccdc86	coiled-coil domain containing 86	0.174204	3.40746	1.28692	0.262687	0.691312
ENSMUSG00000032740	ENSMUSG00000032740	108686	Ccdc88a	coiled coil domain containing 88A	-0.167756	3.02614	0.468962	0.497014	0.833325
ENSMUSG00000021182	ENSMUSG00000021182	68339	Ccdc88c	coiled-coil domain containing 88C	0.193596	1.52398	0.266085	0.608522	0.882044
ENSMUSG00000041375	ENSMUSG00000041375	243846	Ccdc9	coiled-coil domain containing 9	0.054606	3.43423	0.0762142	0.783772	0.940805
ENSMUSG00000030613	ENSMUSG00000030613	66365	Ccdc90b	coiled-coil domain containing 90B	0.143369	2.84574	0.263138	0.610508	0.882387
ENSMUSG00000030301	ENSMUSG00000030301	67015	Ccdc91	coiled-coil domain containing 91	-0.156487	4.22651	1.43425	0.237408	0.675985
ENSMUSG00000026339	ENSMUSG00000026339	70829	Ccdc93	coiled-coil domain containing 93	-0.156471	3.01944	0.458378	0.501885	0.837591
ENSMUSG00000002608	ENSMUSG00000002608	52132	Ccdc97	coiled-coil domain containing 97	0.0834144	3.88194	0.241606	0.625463	0.889939
ENSMUSG00000045838	ENSMUSG00000045838	214239	Ccdc9b	coiled-coil domain containing 9B	-0.0854239	1.21601	0.0403752	0.841664	0.957156
ENSMUSG00000040312	ENSMUSG00000040312	240084	Cchcr1	coiled-coil alpha-helical rod protein 1	0.104894	1.26627	0.113191	0.73812	0.930084
ENSMUSG00000035385	ENSMUSG00000035385	20296	Ccl2	chemokine (C-C motif) ligand 2	-0.868677	1.62743	3.06218	0.0872611	0.503494
ENSMUSG00000004814	ENSMUSG00000004814	56221	Ccl24	chemokine (C-C motif) ligand 24	-0.0742268	1.15628	0.0326103	0.857514	0.960819
ENSMUSG00000023235	ENSMUSG00000023235	20300	Ccl25	chemokine (C-C motif) ligand 25	-0.233477	2.30746	0.585884	0.448054	0.812385
ENSMUSG00000073888	ENSMUSG00000073888	20301	Ccl27a	chemokine (C-C motif) ligand 27A	0.130323	3.88462	0.615285	0.436958	0.810009
ENSMUSG00000096826	ENSMUSG00000096826	100040048	Ccl27b	chemokine (C-C motif) ligand 27b	0.261461	2.12322	0.818692	0.370433	0.772427
ENSMUSG00000035042	ENSMUSG00000035042	20304	Ccl5	chemokine (C-C motif) ligand 5	-0.532943	2.59366	0.874857	0.355653	0.763084
ENSMUSG00000018927	ENSMUSG00000018927	20305	Ccl6	chemokine (C-C motif) ligand 6	0.357969	3.89837	1.41383	0.241474	0.679697
ENSMUSG00000019122	ENSMUSG00000019122	20308	Ccl9	chemokine (C-C motif) ligand 9	0.447987	4.66906	7.2253	0.0100735	0.225546
ENSMUSG00000000378	ENSMUSG00000000378	216527	Ccm2	cerebral cavernous malformation 2	-0.0596202	3.81165	0.108031	0.743938	0.931933
ENSMUSG00000027474	ENSMUSG00000027474	228788	Ccm2l	cerebral cavernous malformation 2-like	0.185097	1.5193	0.383621	0.538828	0.852354
ENSMUSG00000028195	ENSMUSG00000028195	16007	Ccn1	cellular communication network factor 1	0.730311	2.98558	3.8232	0.0575112	0.437034
ENSMUSG00000019997	ENSMUSG00000019997	14219	Ccn2	cellular communication network factor 2	0.717448	2.72087	1.65748	0.205923	0.658917
ENSMUSG00000005124	ENSMUSG00000005124	22402	Ccn4	cellular communication network factor 4	-0.243027	1.49234	0.351596	0.556211	0.856055
ENSMUSG00000032218	ENSMUSG00000032218	12442	Ccnb2	cyclin B2	0.0410485	1.27192	0.00374303	0.951524	0.987855
ENSMUSG00000028252	ENSMUSG00000028252	51813	Ccnc	cyclin C	0.101715	3.3738	0.105739	0.746693	0.932336
ENSMUSG00000070348	ENSMUSG00000070348	12443	Ccnd1	cyclin D1	0.0886008	5.9051	0.128177	0.722265	0.924464
ENSMUSG00000000184	ENSMUSG00000000184	12444	Ccnd2	cyclin D2	0.150481	5.35097	1.26007	0.267655	0.697113
ENSMUSG00000034165	ENSMUSG00000034165	12445	Ccnd3	cyclin D3	0.221371	5.73627	2.80629	0.100905	0.530607
ENSMUSG00000023572	ENSMUSG00000023572	17151	Ccndbp1	cyclin D-type binding-protein 1	-0.0126361	3.97447	0.00533543	0.942098	0.984639
ENSMUSG00000028212	ENSMUSG00000028212	12448	Ccne2	cyclin E2	0.158489	1.0487	0.170984	0.681224	0.91189
ENSMUSG00000072082	ENSMUSG00000072082	12449	Ccnf	cyclin F	-0.0361995	3.20693	0.0208024	0.885969	0.968869
ENSMUSG00000020326	ENSMUSG00000020326	12450	Ccng1	cyclin G1	-0.424608	4.97358	6.94959	0.0114985	0.239798
ENSMUSG00000029385	ENSMUSG00000029385	12452	Ccng2	cyclin G2	0.019781	3.04282	0.00173187	0.967026	0.992303
ENSMUSG00000021548	ENSMUSG00000021548	66671	Ccnh	cyclin H	-0.288804	4.3327	2.40601	0.127949	0.578513
ENSMUSG00000063015	ENSMUSG00000063015	12453	Ccni	cyclin I	0.0751425	6.80839	0.664363	0.419362	0.79773
ENSMUSG00000021258	ENSMUSG00000021258	12454	Ccnk	cyclin K	-0.098632	4.22708	0.338443	0.563663	0.859856
ENSMUSG00000027829	ENSMUSG00000027829	56706	Ccnl1	cyclin L1	0.195792	5.67103	2.60919	0.11331	0.553291
ENSMUSG00000029068	ENSMUSG00000029068	56036	Ccnl2	cyclin L2	0.136763	5.90929	1.80426	0.186004	0.641349
ENSMUSG00000049489	ENSMUSG00000049489	69109	Ccnq	cyclin Q	-0.510423	2.8982	5.19782	0.027458	0.334288
ENSMUSG00000011960	ENSMUSG00000011960	12455	Ccnt1	cyclin T1	0.0898229	5.15482	0.55073	0.461916	0.820484
ENSMUSG00000026349	ENSMUSG00000026349	72949	Ccnt2	cyclin T2	-0.0692977	4.70682	0.22113	0.640476	0.896542
ENSMUSG00000024286	ENSMUSG00000024286	67974	Ccny	cyclin Y	-0.197709	5.46082	3.07498	0.0863869	0.500568
ENSMUSG00000070871	ENSMUSG00000070871	227210	Ccnyl1	cyclin Y-like 1	0.187028	1.76869	0.264064	0.609883	0.882044
ENSMUSG00000033904	ENSMUSG00000033904	101565	Ccp110	centriolar coiled coil protein 110	0.220403	1.06559	0.2769	0.601352	0.877659
ENSMUSG00000034563	ENSMUSG00000034563	72278	Ccpg1	cell cycle progression 1	-0.0374417	4.35705	0.0991358	0.75434	0.933345
ENSMUSG00000086158	ENSMUSG00000086158	546143	Ccpg1os	cell cycle progression 1, opposite strand	-0.249178	2.85023	1.55214	0.219336	0.666758
ENSMUSG00000049103	ENSMUSG00000049103	12772	Ccr2	chemokine (C-C motif) receptor 2	-0.856075	2.00556	5.31607	0.0258446	0.323012
ENSMUSG00000079227	ENSMUSG00000079227	12774	Ccr5	chemokine (C-C motif) receptor 5	-0.137837	2.08568	0.159412	0.691607	0.915085
ENSMUSG00000043953	ENSMUSG00000043953	54199	Ccrl2	chemokine (C-C motif) receptor-like 2	-0.110883	0.946777	0.0637337	0.801851	0.946614
ENSMUSG00000034108	ENSMUSG00000034108	12460	Ccs	copper chaperone for superoxide dismutase	0.240936	7.20605	4.08349	0.0493425	0.40719
ENSMUSG00000058690	ENSMUSG00000058690	72972	Ccser2	coiled-coil serine rich 2	-0.0867026	5.00484	0.458715	0.501729	0.837591
ENSMUSG00000034024	ENSMUSG00000034024	12461	Cct2	chaperonin containing Tcp1, subunit 2 (beta)	-0.042747	5.98014	0.0940093	0.76057	0.935002
ENSMUSG00000001416	ENSMUSG00000001416	12462	Cct3	chaperonin containing Tcp1, subunit 3 (gamma)	-0.149051	5.87034	1.15965	0.287339	0.712181
ENSMUSG00000007739	ENSMUSG00000007739	12464	Cct4	chaperonin containing Tcp1, subunit 4 (delta)	-0.104879	6.0392	0.672801	0.416446	0.796109
ENSMUSG00000022234	ENSMUSG00000022234	12465	Cct5	chaperonin containing Tcp1, subunit 5 (epsilon)	0.109827	5.84146	0.781643	0.381388	0.77927
ENSMUSG00000029447	ENSMUSG00000029447	12466	Cct6a	chaperonin containing Tcp1, subunit 6a (zeta)	-0.12253	6.46858	1.52809	0.22288	0.667875
ENSMUSG00000030007	ENSMUSG00000030007	12468	Cct7	chaperonin containing Tcp1, subunit 7 (eta)	0.0554236	6.14762	0.187076	0.667449	0.907559
ENSMUSG00000025613	ENSMUSG00000025613	12469	Cct8	chaperonin containing Tcp1, subunit 8 (theta)	0.0641709	6.73406	0.574147	0.452607	0.813641
ENSMUSG00000029617	ENSMUSG00000029617	231874	Ccz1	CCZ1 vacuolar protein trafficking and biogenesis associated	0.334395	4.75049	7.21991	0.0100994	0.225546
ENSMUSG00000051439	ENSMUSG00000051439	12475	Cd14	CD14 antigen	0.181603	1.94288	0.174044	0.678627	0.911356
ENSMUSG00000025510	ENSMUSG00000025510	12476	Cd151	CD151 antigen	-0.00801757	5.45655	0.00405941	0.949484	0.987092
ENSMUSG00000008845	ENSMUSG00000008845	93671	Cd163	CD163 antigen	0.614412	2.93718	2.20374	0.145647	0.594066
ENSMUSG00000019818	ENSMUSG00000019818	53599	Cd164	CD164 antigen	-0.232768	7.44702	1.91993	0.172854	0.624819
ENSMUSG00000021624	ENSMUSG00000021624	17079	Cd180	CD180 antigen	0.897704	1.67809	3.92841	0.053735	0.421766
ENSMUSG00000028076	ENSMUSG00000028076	12479	Cd1d1	CD1d1 antigen	-0.280493	7.24152	2.73305	0.105437	0.538691
ENSMUSG00000030577	ENSMUSG00000030577	12483	Cd22	CD22 antigen	0.497287	0.791517	0.853022	0.360677	0.765833
ENSMUSG00000047139	ENSMUSG00000047139	12484	Cd24a	CD24a antigen	0.893939	2.29899	7.76952	0.00778363	0.204292
ENSMUSG00000016496	ENSMUSG00000016496	60533	Cd274	CD274 antigen	0.0471969	1.21834	0.0156997	0.900851	0.972421
ENSMUSG00000061665	ENSMUSG00000061665	12488	Cd2ap	CD2-associated protein	0.069758	5.48878	0.195686	0.660367	0.905777
ENSMUSG00000042502	ENSMUSG00000042502	70233	Cd2bp2	CD2 cytoplasmic tail binding protein 2	0.0280579	3.55392	0.0258734	0.872937	0.965875
ENSMUSG00000034652	ENSMUSG00000034652	217303	Cd300a	CD300A molecule	0.0816733	1.5501	0.0538443	0.817567	0.951336
ENSMUSG00000044811	ENSMUSG00000044811	140497	Cd300c2	CD300C molecule 2	0.01328	1.48148	0.00113833	0.973236	0.994409
ENSMUSG00000034641	ENSMUSG00000034641	217305	Cd300ld	CD300 molecule like family member d	0.105339	3.32931	0.217172	0.643475	0.897529
ENSMUSG00000047798	ENSMUSG00000047798	246746	Cd300lf	CD300 molecule like family member F	-0.291135	1.21343	0.523223	0.473253	0.825186
ENSMUSG00000017309	ENSMUSG00000017309	52685	Cd300lg	CD300 molecule like family member G	0.516332	3.78024	8.14928	0.00651778	0.186939
ENSMUSG00000060703	ENSMUSG00000060703	66205	Cd302	CD302 antigen	0.110468	6.24692	0.506654	0.480304	0.829223
ENSMUSG00000002308	ENSMUSG00000002308	54219	Cd320	CD320 antigen	0.401181	1.68896	1.23431	0.272534	0.700259
ENSMUSG00000002944	ENSMUSG00000002944	12491	Cd36	CD36 molecule	-0.782977	6.45698	12.7087	0.000955756	0.0672522
ENSMUSG00000030798	ENSMUSG00000030798	12493	Cd37	CD37 antigen	-0.174484	1.43233	0.19933	0.657426	0.903982
ENSMUSG00000029084	ENSMUSG00000029084	12494	Cd38	CD38 antigen	-0.0819169	2.92756	0.0994115	0.75401	0.933345
ENSMUSG00000047649	ENSMUSG00000047649	70333	Cd3eap	CD3E antigen, epsilon polypeptide associated protein	0.351008	2.80666	1.88014	0.177189	0.630117
ENSMUSG00000005087	ENSMUSG00000005087	12505	Cd44	CD44 antigen	0.175847	4.00099	0.489478	0.48802	0.830691
ENSMUSG00000055447	ENSMUSG00000055447	16423	Cd47	CD47 antigen (Rh-related antigen, integrin-associated signal transducer)	0.2001	7.13106	0.725168	0.399634	0.78705
ENSMUSG00000015355	ENSMUSG00000015355	12506	Cd48	CD48 antigen	-0.451639	1.18509	0.806563	0.373971	0.773761
ENSMUSG00000000682	ENSMUSG00000000682	23833	Cd52	CD52 antigen	0.200986	3.70681	0.518937	0.475343	0.826143
ENSMUSG00000040747	ENSMUSG00000040747	12508	Cd53	CD53 antigen	-0.0523468	2.46818	0.0197737	0.888834	0.969073
ENSMUSG00000026399	ENSMUSG00000026399	13136	Cd55	CD55 molecule, decay accelerating factor for complement	0.0956489	2.66429	0.214331	0.645649	0.8985
ENSMUSG00000032679	ENSMUSG00000032679	12509	Cd59a	CD59a antigen	-0.441988	7.38046	28.2	3.3377e-06	0.00138142
ENSMUSG00000068686	ENSMUSG00000068686	333883	Cd59b	CD59b antigen	-0.156116	1.97304	0.396762	0.531985	0.84909
ENSMUSG00000015854	ENSMUSG00000015854	11801	Cd5l	CD5 antigen-like	0.34013	6.37928	1.57598	0.217041	0.665407
ENSMUSG00000025351	ENSMUSG00000025351	12512	Cd63	CD63 antigen	0.685515	4.71284	2.1049	0.155508	0.604852
ENSMUSG00000018774	ENSMUSG00000018774	12514	Cd68	CD68 antigen	0.10303	3.47504	0.112694	0.738822	0.93022
ENSMUSG00000028459	ENSMUSG00000028459	12517	Cd72	CD72 antigen	0.497112	1.57134	1.44279	0.236038	0.675103
ENSMUSG00000024610	ENSMUSG00000024610	16149	Cd74	CD74 antigen (invariant polypeptide of major histocompatibility complex, class II antigen-associated)	0.669107	5.77601	4.10785	0.049972	0.410182
ENSMUSG00000037706	ENSMUSG00000037706	12520	Cd81	CD81 antigen	-0.304491	8.34898	7.90335	0.00731006	0.198328
ENSMUSG00000027215	ENSMUSG00000027215	12521	Cd82	CD82 antigen	0.0647847	4.02092	0.0708072	0.791452	0.943587
ENSMUSG00000015396	ENSMUSG00000015396	12522	Cd83	CD83 antigen	0.0565274	1.80058	0.0186378	0.892025	0.9698
ENSMUSG00000038147	ENSMUSG00000038147	12523	Cd84	CD84 antigen	0.461364	2.68486	3.18879	0.0809561	0.490461
ENSMUSG00000022901	ENSMUSG00000022901	12524	Cd86	CD86 antigen	-0.186014	1.12006	0.195473	0.66054	0.905833
ENSMUSG00000030342	ENSMUSG00000030342	12527	Cd9	CD9 antigen	0.531885	3.34939	1.95731	0.169826	0.621539
ENSMUSG00000027435	ENSMUSG00000027435	17064	Cd93	CD93 antigen	-0.340787	4.03544	1.91233	0.173995	0.625776
ENSMUSG00000035776	ENSMUSG00000035776	171486	Cd99l2	CD99 antigen-like 2	0.0296217	4.20132	0.045318	0.832392	0.954972
ENSMUSG00000028755	ENSMUSG00000028755	72269	Cda	cytidine deaminase	0.352839	4.59115	4.11458	0.0485219	0.402889
ENSMUSG00000021982	ENSMUSG00000021982	71891	Cdadc1	cytidine and dCMP deaminase domain containing 1	-0.19119	5.25117	4.1479	0.0476588	0.401964
ENSMUSG00000027284	ENSMUSG00000027284	68968	Cdan1	congenital dyserythropoietic anemia, type I (human)	0.212993	1.60278	0.458459	0.501848	0.837591
ENSMUSG00000039128	ENSMUSG00000039128	98828	Cdc123	cell division cycle 123	-0.0419292	4.65527	0.116091	0.734915	0.928765
ENSMUSG00000033502	ENSMUSG00000033502	229776	Cdc14a	CDC14 cell division cycle 14A	-0.248454	0.96035	0.265493	0.60892	0.882044
ENSMUSG00000033102	ENSMUSG00000033102	218294	Cdc14b	CDC14 cell division cycle 14B	0.00605451	5.686	0.00249263	0.960404	0.991168
ENSMUSG00000038416	ENSMUSG00000038416	69957	Cdc16	CDC16 cell division cycle 16	-0.147477	3.56284	0.596781	0.44389	0.811559
ENSMUSG00000006398	ENSMUSG00000006398	107995	Cdc20	cell division cycle 20	-0.720028	1.64814	1.73006	0.195673	0.649308
ENSMUSG00000024370	ENSMUSG00000024370	52563	Cdc23	CDC23 cell division cycle 23	-0.0357492	3.01142	0.0296075	0.864163	0.963175
ENSMUSG00000032477	ENSMUSG00000032477	12530	Cdc25a	cell division cycle 25A	0.0273167	2.13923	0.0152239	0.902358	0.972778
ENSMUSG00000027330	ENSMUSG00000027330	12531	Cdc25b	cell division cycle 25B	-0.325467	1.03044	0.672084	0.416693	0.79617
ENSMUSG00000066149	ENSMUSG00000066149	66440	Cdc26	cell division cycle 26	-0.173835	4.68402	0.50678	0.480597	0.829223
ENSMUSG00000020687	ENSMUSG00000020687	217232	Cdc27	cell division cycle 27	-0.125476	3.57097	0.573299	0.452939	0.813641
ENSMUSG00000020307	ENSMUSG00000020307	216150	Cdc34	cell division cycle 34	-0.162752	5.8946	2.58197	0.115156	0.555195
ENSMUSG00000019471	ENSMUSG00000019471	12539	Cdc37	cell division cycle 37	0.309457	5.58017	5.40801	0.0246609	0.315857
ENSMUSG00000024780	ENSMUSG00000024780	67072	Cdc37l1	cell division cycle 37-like 1	-0.0181629	5.74961	0.0336992	0.855181	0.959798
ENSMUSG00000038446	ENSMUSG00000038446	71713	Cdc40	cell division cycle 40	-0.0375453	4.26978	0.0905948	0.764823	0.936347
ENSMUSG00000006699	ENSMUSG00000006699	12540	Cdc42	cell division cycle 42	-0.0377924	7.4432	0.125834	0.724465	0.924899
ENSMUSG00000026490	ENSMUSG00000026490	226751	Cdc42bpa	CDC42 binding protein kinase alpha	-0.281639	4.10167	5.76942	0.0205431	0.29474
ENSMUSG00000021279	ENSMUSG00000021279	217866	Cdc42bpb	CDC42 binding protein kinase beta	0.23751	4.35515	2.5918	0.114486	0.55444
ENSMUSG00000024769	ENSMUSG00000024769	240505	Cdc42bpg	CDC42 binding protein kinase gamma (DMPK-like)	-0.28538	3.1544	1.5185	0.224314	0.66799
ENSMUSG00000049521	ENSMUSG00000049521	104445	Cdc42ep1	CDC42 effector protein (Rho GTPase binding) 1	-0.0762429	3.88824	0.208146	0.650442	0.900802
ENSMUSG00000045664	ENSMUSG00000045664	104252	Cdc42ep2	CDC42 effector protein (Rho GTPase binding) 2	-0.179996	2.90449	0.674874	0.415734	0.796098
ENSMUSG00000036533	ENSMUSG00000036533	260409	Cdc42ep3	CDC42 effector protein (Rho GTPase binding) 3	0.819076	1.87839	5.06466	0.0294058	0.342512
ENSMUSG00000041598	ENSMUSG00000041598	56699	Cdc42ep4	CDC42 effector protein (Rho GTPase binding) 4	-0.271841	5.74219	2.61502	0.112919	0.55277
ENSMUSG00000063838	ENSMUSG00000063838	58804	Cdc42ep5	CDC42 effector protein (Rho GTPase binding) 5	0.227702	1.36292	0.386672	0.537225	0.851661
ENSMUSG00000046722	ENSMUSG00000046722	57912	Cdc42se1	CDC42 small effector 1	-0.231661	3.9802	1.25669	0.268288	0.697856
ENSMUSG00000052298	ENSMUSG00000052298	72729	Cdc42se2	CDC42 small effector 2	-0.307436	2.92697	1.62982	0.208346	0.660206
ENSMUSG00000023932	ENSMUSG00000023932	71702	Cdc5l	cell division cycle 5-like (S. pombe)	-0.0433731	5.24071	0.158529	0.692417	0.915316
ENSMUSG00000026361	ENSMUSG00000026361	214498	Cdc73	cell division cycle 73, Paf1/RNA polymerase II complex component	0.0413049	4.44597	0.0985808	0.755006	0.933542
ENSMUSG00000023505	ENSMUSG00000023505	14793	Cdca3	cell division cycle associated 3	-0.236024	1.39062	0.245959	0.622384	0.888133
ENSMUSG00000047832	ENSMUSG00000047832	71963	Cdca4	cell division cycle associated 4	0.0537442	2.70148	0.0604799	0.806869	0.948551
ENSMUSG00000028873	ENSMUSG00000028873	52276	Cdca8	cell division cycle associated 8	0.0828021	1.59338	0.0460584	0.83105	0.954767
ENSMUSG00000035498	ENSMUSG00000035498	109332	Cdcp1	CUB domain containing protein 1	0.136211	1.3848	0.138001	0.712038	0.921496
ENSMUSG00000000303	ENSMUSG00000000303	12550	Cdh1	cadherin 1	1.70305	4.55317	19.9559	7.26812e-05	0.0124146
ENSMUSG00000031841	ENSMUSG00000031841	12554	Cdh13	cadherin 13	-0.265858	3.01112	1.27951	0.264046	0.69218
ENSMUSG00000024304	ENSMUSG00000024304	12558	Cdh2	cadherin 2	-0.0965662	6.51645	0.904598	0.346686	0.758116
ENSMUSG00000000305	ENSMUSG00000000305	12561	Cdh4	cadherin 4	-0.215329	0.836942	0.248755	0.620408	0.887586
ENSMUSG00000031871	ENSMUSG00000031871	12562	Cdh5	cadherin 5	0.169275	3.83523	0.410049	0.525428	0.847187
ENSMUSG00000025497	ENSMUSG00000025497	72040	Cdhr5	cadherin-related family member 5	0.437416	5.52716	9.07132	0.00426934	0.157777
ENSMUSG00000004071	ENSMUSG00000004071	66626	Cdip1	cell death inducing Trp53 target 1	0.0512506	6.10447	0.181106	0.672474	0.908875
ENSMUSG00000030682	ENSMUSG00000030682	52858	Cdipt	CDP-diacylglycerol--inositol 3-phosphatidyltransferase (phosphatidylinositol synthase)	-0.119315	4.93572	1.14019	0.291367	0.714238
ENSMUSG00000019942	ENSMUSG00000019942	12534	Cdk1	cyclin-dependent kinase 1	-0.344707	2.49306	0.473266	0.495642	0.832841
ENSMUSG00000033862	ENSMUSG00000033862	234854	Cdk10	cyclin-dependent kinase 10	0.112041	3.40472	0.315847	0.576932	0.86735
ENSMUSG00000029062	ENSMUSG00000029062	12537	Cdk11b	cyclin-dependent kinase 11B	-0.0686586	5.64618	0.315521	0.577128	0.86735
ENSMUSG00000003119	ENSMUSG00000003119	69131	Cdk12	cyclin-dependent kinase 12	0.217548	4.8962	2.49924	0.120979	0.565534
ENSMUSG00000041297	ENSMUSG00000041297	69562	Cdk13	cyclin-dependent kinase 13	0.224867	4.46113	2.34658	0.132633	0.582485
ENSMUSG00000028926	ENSMUSG00000028926	18647	Cdk14	cyclin-dependent kinase 14	-0.0723257	1.63019	0.0575404	0.811527	0.949739
ENSMUSG00000031065	ENSMUSG00000031065	18555	Cdk16	cyclin-dependent kinase 16	0.295757	3.38195	1.75699	0.191761	0.646732
ENSMUSG00000020015	ENSMUSG00000020015	237459	Cdk17	cyclin-dependent kinase 17	-0.238682	4.04357	1.173	0.284692	0.709566
ENSMUSG00000026437	ENSMUSG00000026437	18557	Cdk18	cyclin-dependent kinase 18	0.0260053	4.1233	0.0256215	0.873552	0.965916
ENSMUSG00000038481	ENSMUSG00000038481	78334	Cdk19	cyclin-dependent kinase 19	0.163251	3.74462	1.21885	0.275518	0.702903
ENSMUSG00000025358	ENSMUSG00000025358	12566	Cdk2	cyclin-dependent kinase 2	0.238178	3.06706	1.04635	0.311875	0.731607
ENSMUSG00000021483	ENSMUSG00000021483	105278	Cdk20	cyclin-dependent kinase 20	-0.0788942	2.28823	0.0771652	0.782462	0.94037
ENSMUSG00000029394	ENSMUSG00000029394	13445	Cdk2ap1	CDK2 (cyclin-dependent kinase 2)-associated protein 1	0.023659	5.45455	0.0531392	0.818744	0.951341
ENSMUSG00000024856	ENSMUSG00000024856	52004	Cdk2ap2	CDK2-associated protein 2	0.116002	5.76154	0.48897	0.488024	0.830691
ENSMUSG00000006728	ENSMUSG00000006728	12567	Cdk4	cyclin-dependent kinase 4	0.219819	3.64848	1.5097	0.225639	0.668929
ENSMUSG00000028969	ENSMUSG00000028969	12568	Cdk5	cyclin-dependent kinase 5	0.0407996	4.09104	0.0868381	0.769606	0.938151
ENSMUSG00000027487	ENSMUSG00000027487	66971	Cdk5rap1	CDK5 regulatory subunit associated protein 1	0.199976	3.36142	0.790927	0.3786	0.77765
ENSMUSG00000039298	ENSMUSG00000039298	214444	Cdk5rap2	CDK5 regulatory subunit associated protein 2	0.101682	2.27358	0.186342	0.668062	0.907751
ENSMUSG00000018669	ENSMUSG00000018669	80280	Cdk5rap3	CDK5 regulatory subunit associated protein 3	-0.00257891	4.69116	0.0003046	0.986153	0.996593
ENSMUSG00000040274	ENSMUSG00000040274	12571	Cdk6	cyclin-dependent kinase 6	-0.173758	6.32798	1.7542	0.192108	0.646732
ENSMUSG00000069089	ENSMUSG00000069089	12572	Cdk7	cyclin-dependent kinase 7	-0.187497	3.1007	0.530369	0.470265	0.824151
ENSMUSG00000029635	ENSMUSG00000029635	264064	Cdk8	cyclin-dependent kinase 8	-0.0198055	4.35375	0.00975769	0.921756	0.977879
ENSMUSG00000009555	ENSMUSG00000009555	107951	Cdk9	cyclin-dependent kinase 9 (CDC2-related kinase)	-0.0558211	4.73521	0.163487	0.687902	0.913495
ENSMUSG00000006191	ENSMUSG00000006191	68916	Cdkal1	CDK5 regulatory subunit associated protein 1-like 1	0.363848	3.51214	4.77123	0.0342466	0.361895
ENSMUSG00000029403	ENSMUSG00000029403	53886	Cdkl2	cyclin-dependent kinase-like 2 (CDC2-related kinase)	-0.0550995	2.9813	0.052133	0.820438	0.951652
ENSMUSG00000031292	ENSMUSG00000031292	382253	Cdkl5	cyclin-dependent kinase-like 5	0.228378	2.42446	0.975002	0.328771	0.744275
ENSMUSG00000023067	ENSMUSG00000023067	12575	Cdkn1a	cyclin-dependent kinase inhibitor 1A (P21)	0.244859	3.7807	0.249231	0.620634	0.887586
ENSMUSG00000003031	ENSMUSG00000003031	12576	Cdkn1b	cyclin-dependent kinase inhibitor 1B	-0.0630547	4.61695	0.157388	0.693468	0.915483
ENSMUSG00000037664	ENSMUSG00000037664	12577	Cdkn1c	cyclin-dependent kinase inhibitor 1C (P57)	-0.0258887	1.81664	0.00685484	0.934386	0.981831
ENSMUSG00000038069	ENSMUSG00000038069	70925	Cdkn2aip	CDKN2A interacting protein	0.112065	3.24448	0.31725	0.57609	0.867158
ENSMUSG00000020392	ENSMUSG00000020392	52626	Cdkn2aipnl	CDKN2A interacting protein N-terminal like	0.0664617	3.14381	0.120065	0.730597	0.928208
ENSMUSG00000028551	ENSMUSG00000028551	12580	Cdkn2c	cyclin dependent kinase inhibitor 2C	0.251138	1.52952	0.484909	0.489827	0.831612
ENSMUSG00000096472	ENSMUSG00000096472	12581	Cdkn2d	cyclin dependent kinase inhibitor 2D	0.0962799	2.31588	0.138191	0.711849	0.921496
ENSMUSG00000033022	ENSMUSG00000033022	12583	Cdo1	cysteine dioxygenase 1, cytosolic	0.116634	10.317	1.12376	0.294826	0.717788
ENSMUSG00000064284	ENSMUSG00000064284	72355	Cdpf1	cysteine rich, DPF motif domain containing 1	-0.167728	1.93349	0.266047	0.608548	0.882044
ENSMUSG00000050910	ENSMUSG00000050910	237988	Cdr2l	cerebellar degeneration-related protein 2-like	-0.208951	1.08008	0.459536	0.501348	0.837591
ENSMUSG00000058793	ENSMUSG00000058793	110911	Cds2	CDP-diacylglycerol synthase (phosphatidate cytidylyltransferase) 2	-0.0657651	5.2499	0.385205	0.537995	0.851877
ENSMUSG00000006585	ENSMUSG00000006585	67177	Cdt1	chromatin licensing and DNA replication factor 1	-0.0969708	1.94501	0.0928983	0.761945	0.935002
ENSMUSG00000032803	ENSMUSG00000032803	321022	Cdv3	carnitine deficiency-associated gene expressed in ventricle 3	0.126766	6.72016	1.91431	0.173383	0.625296
ENSMUSG00000059288	ENSMUSG00000059288	12593	Cdyl	chromodomain protein, Y chromosome-like	-0.113165	2.55971	0.327759	0.569861	0.863818
ENSMUSG00000031758	ENSMUSG00000031758	75796	Cdyl2	chromodomain protein, Y chromosome-like 2	0.0111644	1.69151	0.000780914	0.977831	0.995938
ENSMUSG00000074272	ENSMUSG00000074272	26365	Ceacam1	carcinoembryonic antigen-related cell adhesion molecule 1	0.135851	6.6952	1.95043	0.169464	0.621463
ENSMUSG00000054385	ENSMUSG00000054385	26367	Ceacam2	carcinoembryonic antigen-related cell adhesion molecule 2	0.0309914	5.59704	0.0387556	0.844829	0.957175
ENSMUSG00000034957	ENSMUSG00000034957	12606	Cebpa	CCAAT/enhancer binding protein (C/EBP), alpha	0.172836	7.94069	1.59822	0.212733	0.664527
ENSMUSG00000056501	ENSMUSG00000056501	12608	Cebpb	CCAAT/enhancer binding protein (C/EBP), beta	-0.0977718	5.59676	0.180101	0.673546	0.90918
ENSMUSG00000071637	ENSMUSG00000071637	12609	Cebpd	CCAAT/enhancer binding protein (C/EBP), delta	-0.283967	3.19181	1.3412	0.252997	0.683943
ENSMUSG00000052435	ENSMUSG00000052435	110794	Cebpe	CCAAT/enhancer binding protein (C/EBP), epsilon	-0.107625	2.9828	0.239498	0.626971	0.890436
ENSMUSG00000056216	ENSMUSG00000056216	12611	Cebpg	CCAAT/enhancer binding protein (C/EBP), gamma	-0.222967	5.27387	1.38335	0.245934	0.680639
ENSMUSG00000024081	ENSMUSG00000024081	12607	Cebpz	CCAAT/enhancer binding protein zeta	0.119399	5.5001	0.815689	0.371304	0.772427
ENSMUSG00000062691	ENSMUSG00000062691	68554	Cebpzos	CCAAT/enhancer binding protein (C/EBP), zeta, opposite strand	-0.395986	3.93422	3.18784	0.0810521	0.490461
ENSMUSG00000071226	ENSMUSG00000071226	330409	Cecr2	CECR2, histone acetyl-lysine reader	0.215685	4.24762	2.28557	0.137647	0.584803
ENSMUSG00000023031	ENSMUSG00000023031	109901	Cela1	chymotrypsin-like elastase family, member 1	0.443891	4.70139	3.16155	0.0828656	0.492389
ENSMUSG00000005506	ENSMUSG00000005506	13046	Celf1	CUGBP, Elav-like family member 1	0.0424601	6.85291	0.183185	0.670713	0.908324
ENSMUSG00000002107	ENSMUSG00000002107	14007	Celf2	CUGBP, Elav-like family member 2	0.0788282	5.89734	0.534749	0.468448	0.823513
ENSMUSG00000016028	ENSMUSG00000016028	12614	Celsr1	cadherin, EGF LAG seven-pass G-type receptor 1	-0.570205	2.43962	3.37039	0.0730609	0.473765
ENSMUSG00000024754	ENSMUSG00000024754	83921	Cemip2	cell migration inducing hyaluronidase 2	-0.223925	5.31655	2.0078	0.163451	0.61303
ENSMUSG00000029177	ENSMUSG00000029177	12615	Cenpa	centromere protein A	0.259579	2.85965	0.652155	0.423814	0.800516
ENSMUSG00000068267	ENSMUSG00000068267	12616	Cenpb	centromere protein B	0.0930246	5.82954	0.68149	0.413475	0.794821
ENSMUSG00000029253	ENSMUSG00000029253	12617	Cenpc1	centromere protein C1	0.314973	1.92023	0.932453	0.339442	0.752977
ENSMUSG00000045328	ENSMUSG00000045328	229841	Cenpe	centromere protein E	-0.45003	1.37137	0.893271	0.349693	0.759415
ENSMUSG00000026605	ENSMUSG00000026605	108000	Cenpf	centromere protein F	-0.403793	1.78976	1.08898	0.30233	0.723937
ENSMUSG00000064128	ENSMUSG00000064128	219103	Cenpj	centromere protein J	0.0502546	2.13852	0.0412379	0.840004	0.957156
ENSMUSG00000021714	ENSMUSG00000021714	60411	Cenpk	centromere protein K	-0.285956	0.907246	0.396755	0.531989	0.84909
ENSMUSG00000026708	ENSMUSG00000026708	70454	Cenpl	centromere protein L	-0.126634	3.07278	0.450321	0.505649	0.839435
ENSMUSG00000068101	ENSMUSG00000068101	66570	Cenpm	centromere protein M	-0.508605	2.17021	3.36574	0.073252	0.473765
ENSMUSG00000020652	ENSMUSG00000020652	52504	Cenpo	centromere protein O	0.0347533	1.06538	0.00738466	0.931904	0.980986
ENSMUSG00000023919	ENSMUSG00000023919	83815	Cenpq	centromere protein Q	-0.112169	1.40012	0.0902915	0.765205	0.93642
ENSMUSG00000036672	ENSMUSG00000036672	320394	Cenpt	centromere protein T	-0.575267	0.772812	2.00105	0.164145	0.613542
ENSMUSG00000018509	ENSMUSG00000018509	73139	Cenpv	centromere protein V	0.181415	5.21276	2.3862	0.129489	0.57946
ENSMUSG00000075266	ENSMUSG00000075266	66311	Cenpw	centromere protein W	-0.251535	2.53731	1.03663	0.314107	0.73353
ENSMUSG00000025144	ENSMUSG00000025144	20892	Cenpx	centromere protein X	-0.156789	4.10192	0.58383	0.448845	0.81298
ENSMUSG00000039523	ENSMUSG00000039523	230967	Cep104	centrosomal protein 104	0.125618	2.35818	0.246438	0.622037	0.887999
ENSMUSG00000048799	ENSMUSG00000048799	225523	Cep120	centrosomal protein 120	0.299004	3.59392	2.66701	0.1095	0.545524
ENSMUSG00000039781	ENSMUSG00000039781	12009	Cep131	centrosomal protein 131	-0.28101	1.04974	0.349679	0.557285	0.856478
ENSMUSG00000036403	ENSMUSG00000036403	381644	Cep135	centrosomal protein 135	0.192008	2.71107	0.517657	0.475602	0.826143
ENSMUSG00000068394	ENSMUSG00000068394	99100	Cep152	centrosomal protein 152	0.0810899	1.5326	0.0406641	0.841106	0.957156
ENSMUSG00000056919	ENSMUSG00000056919	382090	Cep162	centrosomal protein 162	-0.289241	2.94177	2.25216	0.140486	0.587589
ENSMUSG00000043987	ENSMUSG00000043987	214552	Cep164	centrosomal protein 164	0.326188	3.11385	3.0424	0.0880157	0.505409
ENSMUSG00000057335	ENSMUSG00000057335	545389	Cep170	centrosomal protein 170	0.110515	2.34876	0.168564	0.68336	0.91189
ENSMUSG00000072825	ENSMUSG00000072825	217882	Cep170b	centrosomal protein 170B	0.340227	4.54669	5.6171	0.0221805	0.303644
ENSMUSG00000035790	ENSMUSG00000035790	66994	Cep19	centrosomal protein 19	-0.0958056	2.93648	0.230896	0.633212	0.89316
ENSMUSG00000024542	ENSMUSG00000024542	70799	Cep192	centrosomal protein 192	0.283762	1.88082	1.22359	0.274597	0.701886
ENSMUSG00000038241	ENSMUSG00000038241	16328	Cep250	centrosomal protein 250	-0.0664264	2.38199	0.053785	0.817666	0.951336
ENSMUSG00000019971	ENSMUSG00000019971	216274	Cep290	centrosomal protein 290	0.333075	2.94738	2.80521	0.100969	0.530607
ENSMUSG00000046111	ENSMUSG00000046111	319675	Cep295	centrosomal protein 295	0.425769	2.6392	3.27868	0.0769357	0.479667
ENSMUSG00000033671	ENSMUSG00000033671	74081	Cep350	centrosomal protein 350	0.0644568	4.59047	0.309675	0.580666	0.869082
ENSMUSG00000029790	ENSMUSG00000029790	83922	Cep41	centrosomal protein 41	-0.201519	1.49823	0.303442	0.584486	0.869938
ENSMUSG00000038215	ENSMUSG00000038215	382010	Cep44	centrosomal protein 44	-0.0323438	3.23557	0.0341161	0.854299	0.959686
ENSMUSG00000031922	ENSMUSG00000031922	74360	Cep57	centrosomal protein 57	0.226712	3.97883	3.1742	0.0816308	0.490461
ENSMUSG00000019813	ENSMUSG00000019813	103268	Cep57l1	centrosomal protein 57-like 1	-0.322807	2.3843	1.33929	0.253329	0.684256
ENSMUSG00000032534	ENSMUSG00000032534	28135	Cep63	centrosomal protein 63	-0.0495633	3.03312	0.0709853	0.791137	0.943352
ENSMUSG00000044066	ENSMUSG00000044066	216543	Cep68	centrosomal protein 68	-0.0875909	2.49514	0.134363	0.715687	0.922957
ENSMUSG00000056267	ENSMUSG00000056267	68121	Cep70	centrosomal protein 70	0.146132	2.73247	0.479192	0.492383	0.832098
ENSMUSG00000073542	ENSMUSG00000073542	225659	Cep76	centrosomal protein 76	-0.201967	1.23106	0.292299	0.591445	0.87264
ENSMUSG00000020024	ENSMUSG00000020024	77048	Cep83	centrosomal protein 83	0.306788	3.00399	1.44104	0.236318	0.675103
ENSMUSG00000037443	ENSMUSG00000037443	70012	Cep85	centrosomal protein 85	-0.333071	5.48686	4.27549	0.0445062	0.392412
ENSMUSG00000038594	ENSMUSG00000038594	100038725	Cep85l	centrosomal protein 85-like	0.11287	3.91383	0.248971	0.620283	0.887586
ENSMUSG00000023072	ENSMUSG00000023072	72140	Cep89	centrosomal protein 89	0.0265843	1.73242	0.0106722	0.918184	0.97727
ENSMUSG00000018372	ENSMUSG00000018372	320162	Cep95	centrosomal protein 95	-0.012391	2.46413	0.0025859	0.959671	0.990697
ENSMUSG00000022604	ENSMUSG00000022604	74201	Cep97	centrosomal protein 97	0.179739	2.09058	0.449558	0.506008	0.839435
ENSMUSG00000040774	ENSMUSG00000040774	99712	Cept1	choline/ethanolaminephosphotransferase 1	-0.321463	5.94679	3.124	0.0842073	0.494688
ENSMUSG00000035891	ENSMUSG00000035891	223753	Cerk	ceramide kinase	0.268547	2.22652	0.619103	0.435549	0.808907
ENSMUSG00000075256	ENSMUSG00000075256	228094	Cerkl	ceramide kinase-like	-0.0845759	1.34593	0.0517814	0.821034	0.95196
ENSMUSG00000015714	ENSMUSG00000015714	76893	Cers2	ceramide synthase 2	-0.379123	7.93158	2.43636	0.126652	0.576286
ENSMUSG00000008206	ENSMUSG00000008206	67260	Cers4	ceramide synthase 4	0.595626	2.28834	4.12358	0.048287	0.402707
ENSMUSG00000023021	ENSMUSG00000023021	71949	Cers5	ceramide synthase 5	0.270458	1.37783	0.674451	0.415879	0.796098
ENSMUSG00000027035	ENSMUSG00000027035	241447	Cers6	ceramide synthase 6	-0.512746	3.19901	6.68642	0.0130608	0.252297
ENSMUSG00000078964	ENSMUSG00000078964	382044	Ces1b	carboxylesterase 1B	-0.674238	6.28906	10.1962	0.00271242	0.128966
ENSMUSG00000057400	ENSMUSG00000057400	13884	Ces1c	carboxylesterase 1C	-0.195417	10.5196	1.76866	0.19032	0.645231
ENSMUSG00000056973	ENSMUSG00000056973	104158	Ces1d	carboxylesterase 1D	-0.401296	7.73385	1.27623	0.266024	0.694825
ENSMUSG00000061959	ENSMUSG00000061959	13897	Ces1e	carboxylesterase 1E	-0.0279006	6.86783	0.037326	0.847681	0.957378
ENSMUSG00000031725	ENSMUSG00000031725	234564	Ces1f	carboxylesterase 1F	-0.174857	7.38118	1.24474	0.270545	0.699581
ENSMUSG00000057074	ENSMUSG00000057074	12623	Ces1g	carboxylesterase 1G	-0.635279	7.00428	20.6995	4.11965e-05	0.00861884
ENSMUSG00000055730	ENSMUSG00000055730	102022	Ces2a	carboxylesterase 2A	0.465417	6.13901	5.78995	0.0205848	0.29474
ENSMUSG00000061825	ENSMUSG00000061825	234671	Ces2c	carboxylesterase 2C	-0.605138	6.13738	8.58003	0.00551892	0.179423
ENSMUSG00000031886	ENSMUSG00000031886	234673	Ces2e	carboxylesterase 2E	-0.544847	7.51772	28.6533	2.89376e-06	0.00124559
ENSMUSG00000031877	ENSMUSG00000031877	72361	Ces2g	carboxylesterase 2G	-0.570691	4.90912	12.2573	0.00106619	0.0723255
ENSMUSG00000069922	ENSMUSG00000069922	382053	Ces3a	carboxylesterase 3A	0.208423	10.3618	2.0728	0.15694	0.606839
ENSMUSG00000062181	ENSMUSG00000062181	13909	Ces3b	carboxylesterase 3B	0.899102	8.59551	10.9303	0.00207432	0.113887
ENSMUSG00000031347	ENSMUSG00000031347	26370	Cetn2	centrin 2	-0.139766	3.94354	1.26373	0.26697	0.696451
ENSMUSG00000021537	ENSMUSG00000021537	12626	Cetn3	centrin 3	0.330077	6.23784	4.64311	0.0366254	0.365357
ENSMUSG00000026649	ENSMUSG00000026649	75472	Cfap126	cilia and flagella associated protein 126	0.527479	1.30455	1.91136	0.173708	0.625776
ENSMUSG00000031796	ENSMUSG00000031796	14894	Cfap20	cilia and flagella associated protein 20	-0.0780534	4.52947	0.042651	0.837522	0.956707
ENSMUSG00000022972	ENSMUSG00000022972	68001	Cfap298	cilia and flagella associate protien 298	0.146543	4.39055	0.942751	0.336816	0.750993
ENSMUSG00000020462	ENSMUSG00000020462	216618	Cfap36	cilia and flagella associated protein 36	-0.269468	3.54298	2.2538	0.140345	0.587589
ENSMUSG00000020284	ENSMUSG00000020284	67884	Cfap410	cilia and flagella associated protein 410	-0.10735	2.33056	0.192945	0.662601	0.906049
ENSMUSG00000031631	ENSMUSG00000031631	66756	Cfap97	cilia and flagella associated protein 97	0.0313285	3.63614	0.0245506	0.8762	0.96656
ENSMUSG00000090231	ENSMUSG00000090231	14962	Cfb	complement factor B	0.133615	3.29201	0.234972	0.630288	0.892403
ENSMUSG00000061780	ENSMUSG00000061780	11537	Cfd	complement factor D (adipsin)	-1.52845	5.52702	8.68395	0.00561407	0.181421
ENSMUSG00000031954	ENSMUSG00000031954	23837	Cfdp1	craniofacial development protein 1	0.122043	6.06596	1.27477	0.26492	0.693189
ENSMUSG00000026365	ENSMUSG00000026365	12628	Cfh	complement component factor h	0.0325708	7.75733	0.0442651	0.834321	0.955628
ENSMUSG00000057037	ENSMUSG00000057037	50702	Cfhr1	complement factor H-related 1	-0.170718	5.42981	0.411183	0.525153	0.847187
ENSMUSG00000033898	ENSMUSG00000033898	545366	Cfhr2	complement factor H-related 2	-0.134091	7.06815	0.203305	0.654689	0.902761
ENSMUSG00000058952	ENSMUSG00000058952	12630	Cfi	complement component factor i	-0.1092	7.80334	0.611129	0.4385	0.810319
ENSMUSG00000056201	ENSMUSG00000056201	12631	Cfl1	cofilin 1, non-muscle	-0.022395	6.535	0.0310188	0.860997	0.962017
ENSMUSG00000062929	ENSMUSG00000062929	12632	Cfl2	cofilin 2, muscle	0.102208	5.50222	0.969775	0.330057	0.745356
ENSMUSG00000026031	ENSMUSG00000026031	12633	Cflar	CASP8 and FADD-like apoptosis regulator	0.0550074	5.75178	0.312295	0.579075	0.868129
ENSMUSG00000001128	ENSMUSG00000001128	18636	Cfp	complement factor properdin	0.00909926	3.77112	0.00214378	0.963277	0.99185
ENSMUSG00000054604	ENSMUSG00000054604	106143	Cggbp1	CGG triplet repeat binding protein 1	-0.0298125	5.70153	0.0271156	0.869966	0.964528
ENSMUSG00000068876	ENSMUSG00000068876	70737	Cgn	cingulin	-0.0795993	4.7862	0.108566	0.743473	0.931592
ENSMUSG00000032232	ENSMUSG00000032232	68178	Cgnl1	cingulin-like 1	-0.0982628	6.03748	0.702865	0.406301	0.791205
ENSMUSG00000029161	ENSMUSG00000029161	68567	Cgref1	cell growth regulator with EF hand domain 1	-0.225175	1.88462	0.392682	0.534093	0.850098
ENSMUSG00000055128	ENSMUSG00000055128	68755	Cgrrf1	cell growth regulator with ring finger domain 1	-0.122561	4.6858	0.479016	0.492462	0.832098
ENSMUSG00000027313	ENSMUSG00000027313	69065	Chac1	ChaC, cation transport regulator 1	-0.451731	1.6979	1.53864	0.221317	0.667301
ENSMUSG00000020309	ENSMUSG00000020309	68044	Chac2	ChaC, cation transport regulator 2	-0.718903	2.96224	4.7741	0.0344593	0.361895
ENSMUSG00000002835	ENSMUSG00000002835	27221	Chaf1a	chromatin assembly factor 1, subunit A (p150)	-0.411504	1.08949	1.2331	0.272765	0.700259
ENSMUSG00000047710	ENSMUSG00000047710	101994	Champ1	chromosome alignment maintaining phosphoprotein 1	0.0652306	2.68971	0.0851301	0.771817	0.938684
ENSMUSG00000063787	ENSMUSG00000063787	66121	Chchd1	coiled-coil-helix-coiled-coil-helix domain containing 1	0.070503	5.76202	0.200897	0.656171	0.903526
ENSMUSG00000049422	ENSMUSG00000049422	103172	Chchd10	coiled-coil-helix-coiled-coil-helix domain containing 10	0.152287	10.0518	1.62279	0.209313	0.660805
ENSMUSG00000070493	ENSMUSG00000070493	14004	Chchd2	coiled-coil-helix-coiled-coil-helix domain containing 2	-0.0569028	10.5005	0.254057	0.616718	0.886403
ENSMUSG00000053768	ENSMUSG00000053768	66075	Chchd3	coiled-coil-helix-coiled-coil-helix domain containing 3	-0.0266204	6.04781	0.0532064	0.818631	0.951341
ENSMUSG00000034203	ENSMUSG00000034203	72170	Chchd4	coiled-coil-helix-coiled-coil-helix domain containing 4	-0.208029	4.21931	1.74217	0.193609	0.647904
ENSMUSG00000037938	ENSMUSG00000037938	66170	Chchd5	coiled-coil-helix-coiled-coil-helix domain containing 5	0.138433	3.88031	0.807042	0.373828	0.773761
ENSMUSG00000030086	ENSMUSG00000030086	66098	Chchd6	coiled-coil-helix-coiled-coil-helix domain containing 6	-0.345245	2.35201	2.05223	0.158966	0.608136
ENSMUSG00000042198	ENSMUSG00000042198	66433	Chchd7	coiled-coil-helix-coiled-coil-helix domain containing 7	0.109672	4.53464	0.392466	0.534205	0.850098
ENSMUSG00000023852	ENSMUSG00000023852	12648	Chd1	chromodomain helicase DNA binding protein 1	0.116201	5.07968	0.852386	0.360854	0.765908
ENSMUSG00000028089	ENSMUSG00000028089	68058	Chd1l	chromodomain helicase DNA binding protein 1-like	-0.523395	3.08002	6.89413	0.0118103	0.243004
ENSMUSG00000078671	ENSMUSG00000078671	244059	Chd2	chromodomain helicase DNA binding protein 2	0.205556	5.40956	1.61502	0.210387	0.662813
ENSMUSG00000018474	ENSMUSG00000018474	216848	Chd3	chromodomain helicase DNA binding protein 3	0.271728	6.5257	2.62601	0.112259	0.551402
ENSMUSG00000063870	ENSMUSG00000063870	107932	Chd4	chromodomain helicase DNA binding protein 4	0.327218	6.69478	4.91066	0.0318468	0.352135
ENSMUSG00000057133	ENSMUSG00000057133	71389	Chd6	chromodomain helicase DNA binding protein 6	0.125643	4.42833	0.76583	0.386206	0.780411
ENSMUSG00000041235	ENSMUSG00000041235	320790	Chd7	chromodomain helicase DNA binding protein 7	0.286804	5.41039	3.87034	0.0553954	0.427012
ENSMUSG00000053754	ENSMUSG00000053754	67772	Chd8	chromodomain helicase DNA binding protein 8	9.20128e-05	4.96337	5.05611e-07	0.999436	0.999741
ENSMUSG00000056608	ENSMUSG00000056608	109151	Chd9	chromodomain helicase DNA binding protein 9	0.0787784	5.40825	0.43156	0.514606	0.843721
ENSMUSG00000015970	ENSMUSG00000015970	218865	Chdh	choline dehydrogenase	0.0461534	6.17508	0.167919	0.683932	0.912041
ENSMUSG00000029521	ENSMUSG00000029521	50883	Chek2	checkpoint kinase 2	-0.886101	1.37623	8.23546	0.00626218	0.186668
ENSMUSG00000052488	ENSMUSG00000052488	27967	Cherp	calcium homeostasis endoplasmic reticulum protein	0.0944785	4.63439	0.371386	0.545347	0.85328
ENSMUSG00000014668	ENSMUSG00000014668	231600	Chfr	checkpoint with forkhead and ring finger domains	0.293538	3.81783	4.7679	0.0343064	0.361895
ENSMUSG00000031327	ENSMUSG00000031327	12212	Chic1	cysteine-rich hydrophobic domain 1	0.356397	2.49626	1.1404	0.291323	0.714238
ENSMUSG00000029229	ENSMUSG00000029229	74277	Chic2	cysteine-rich hydrophobic domain 2	0.103538	4.42827	0.450683	0.505479	0.839435
ENSMUSG00000025512	ENSMUSG00000025512	68038	Chid1	chitinase domain containing 1	0.00787408	3.92435	0.00371502	0.951671	0.987855
ENSMUSG00000024843	ENSMUSG00000024843	12660	Chka	choline kinase alpha	0.278563	5.27655	0.707859	0.405559	0.790762
ENSMUSG00000022617	ENSMUSG00000022617	12651	Chkb	choline kinase beta	0.372156	5.01812	3.69287	0.0611974	0.447204
ENSMUSG00000025531	ENSMUSG00000025531	12662	Chm	choroidermia (RAB escort protein 1)	0.103367	4.38731	0.495778	0.485028	0.829785
ENSMUSG00000078185	ENSMUSG00000078185	12663	Chml	choroideremia-like	0.512972	0.925368	1.24756	0.27001	0.69945
ENSMUSG00000000743	ENSMUSG00000000743	234852	Chmp1a	charged multivesicular body protein 1A	0.19894	5.26288	0.81956	0.370562	0.772427
ENSMUSG00000109901	ENSMUSG00000109901	67064	Chmp1b	charged multivesicular body protein 1B	-0.068702	4.19138	0.231226	0.632971	0.893064
ENSMUSG00000033916	ENSMUSG00000033916	68953	Chmp2a	charged multivesicular body protein 2A	-0.0356514	5.38744	0.085174	0.77176	0.938684
ENSMUSG00000004843	ENSMUSG00000004843	68942	Chmp2b	charged multivesicular body protein 2B	-0.161077	5.3819	1.98853	0.165442	0.615447
ENSMUSG00000053119	ENSMUSG00000053119	66700	Chmp3	charged multivesicular body protein 3	-0.0693901	6.06056	0.53054	0.470193	0.824151
ENSMUSG00000038467	ENSMUSG00000038467	75608	Chmp4b	charged multivesicular body protein 4B	0.0592476	6.43495	0.332047	0.567358	0.862214
ENSMUSG00000027536	ENSMUSG00000027536	66371	Chmp4c	charged multivesicular body protein 4C	0.120156	1.0457	0.0797211	0.778984	0.94016
ENSMUSG00000028419	ENSMUSG00000028419	76959	Chmp5	charged multivesicular body protein 5	-0.266299	6.09054	2.19061	0.146109	0.594066
ENSMUSG00000025371	ENSMUSG00000025371	208092	Chmp6	charged multivesicular body protein 6	0.176871	3.17931	0.649497	0.424576	0.800992
ENSMUSG00000034190	ENSMUSG00000034190	105513	Chmp7	charged multivesicular body protein 7	0.00154739	4.13726	2.88372e-05	0.995742	0.998247
ENSMUSG00000086544	ENSMUSG00000086544	329427	Chn1os3	chimerin 1, opposite strand 3	0.125294	1.51494	0.098885	0.75464	0.933345
ENSMUSG00000004633	ENSMUSG00000004633	69993	Chn2	chimerin 2	-0.14401	5.47747	1.05957	0.308872	0.728579
ENSMUSG00000001774	ENSMUSG00000001774	66917	Chordc1	cysteine and histidine-rich domain (CHORD)-containing, zinc-binding protein 1	-0.0238773	5.056	0.0218507	0.883152	0.96806
ENSMUSG00000014077	ENSMUSG00000014077	56398	Chp1	calcineurin-like EF hand protein 1	-0.0263285	7.80372	0.0602697	0.807198	0.948551
ENSMUSG00000030865	ENSMUSG00000030865	70261	Chp2	calcineurin-like EF hand protein 2	0.713158	0.834622	2.04208	0.159978	0.609579
ENSMUSG00000032997	ENSMUSG00000032997	74241	Chpf	chondroitin polymerizing factor	0.525669	1.63259	2.47321	0.12288	0.569473
ENSMUSG00000038181	ENSMUSG00000038181	100910	Chpf2	chondroitin polymerizing factor 2	0.0606761	3.75297	0.127979	0.722227	0.924464
ENSMUSG00000060002	ENSMUSG00000060002	212862	Chpt1	choline phosphotransferase 1	-0.567703	7.73574	18.4928	9.17653e-05	0.0149619
ENSMUSG00000068391	ENSMUSG00000068391	93696	Chrac1	chromatin accessibility complex 1	-0.0337967	3.83681	0.0454592	0.832135	0.954922
ENSMUSG00000006958	ENSMUSG00000006958	12667	Chrd	chordin	-0.435047	1.96152	1.78153	0.188747	0.644038
ENSMUSG00000046159	ENSMUSG00000046159	12671	Chrm3	cholinergic receptor, muscarinic 3, cardiac	-0.2504	2.70047	0.66884	0.417821	0.796611
ENSMUSG00000022041	ENSMUSG00000022041	110902	Chrna2	cholinergic receptor, nicotinic, alpha polypeptide 2 (neuronal)	0.341088	1.93892	1.07257	0.305958	0.727152
ENSMUSG00000027577	ENSMUSG00000027577	11438	Chrna4	cholinergic receptor, nicotinic, alpha polypeptide 4	1.36623	2.39363	4.33257	0.0444085	0.392412
ENSMUSG00000056643	ENSMUSG00000056643	71797	Chst13	carbohydrate sulfotransferase 13	-0.042294	2.08054	0.0178729	0.89425	0.97065
ENSMUSG00000074916	ENSMUSG00000074916	72136	Chst14	carbohydrate sulfotransferase 14	-0.121015	1.32283	0.0935332	0.761158	0.935002
ENSMUSG00000030930	ENSMUSG00000030930	77590	Chst15	carbohydrate sulfotransferase 15	0.108286	4.02232	0.370777	0.545675	0.85328
ENSMUSG00000033350	ENSMUSG00000033350	54371	Chst2	carbohydrate sulfotransferase 2	0.271737	1.56509	0.623919	0.433781	0.808022
ENSMUSG00000032640	ENSMUSG00000032640	269941	Chsy1	chondroitin sulfate synthase 1	0.326611	2.4366	2.24202	0.141361	0.589149
ENSMUSG00000058152	ENSMUSG00000058152	78923	Chsy3	chondroitin sulfate synthase 3	-0.373702	2.16464	0.99264	0.324482	0.740338
ENSMUSG00000001017	ENSMUSG00000001017	66511	Chtop	chromatin target of PRMT1	-0.0072848	5.36608	0.00555439	0.940924	0.984311
ENSMUSG00000025199	ENSMUSG00000025199	12675	Chuk	conserved helix-loop-helix ubiquitous kinase	-0.288692	6.12911	1.48596	0.230102	0.671018
ENSMUSG00000090258	ENSMUSG00000090258	211151	Churc1	churchill domain containing 1	-0.0888497	2.54432	0.0729737	0.788316	0.942669
ENSMUSG00000003662	ENSMUSG00000003662	26371	Ciao1	cytosolic iron-sulfur protein assembly 1	-0.034035	4.08437	0.0456674	0.831757	0.954826
ENSMUSG00000032381	ENSMUSG00000032381	68250	Ciao2a	cytosolic iron-sulfur assembly component 2A	-0.203209	5.15028	1.46322	0.232801	0.673071
ENSMUSG00000031879	ENSMUSG00000031879	68523	Ciao2b	cytosolic iron-sulfur assembly component 2B	-0.241736	3.73454	2.01267	0.162952	0.612958
ENSMUSG00000002280	ENSMUSG00000002280	67563	Ciao3	cytosolic iron-sulfur assembly component 3	0.1884	3.66763	1.4203	0.239668	0.677904
ENSMUSG00000031781	ENSMUSG00000031781	109006	Ciapin1	cytokine induced apoptosis inhibitor 1	0.098038	4.92638	0.300255	0.586459	0.870998
ENSMUSG00000038550	ENSMUSG00000038550	229599	Ciart	circadian associated repressor of transcription	-0.0608455	2.28501	0.0061279	0.938036	0.983067
ENSMUSG00000030538	ENSMUSG00000030538	23991	Cib1	calcium and integrin binding 1 (calmyrin)	-0.0263315	5.68528	0.0648417	0.800173	0.946365
ENSMUSG00000037493	ENSMUSG00000037493	56506	Cib2	calcium and integrin binding family member 2	-0.189116	1.14202	0.22199	0.639828	0.896222
ENSMUSG00000074240	ENSMUSG00000074240	234421	Cib3	calcium and integrin binding family member 3	2.6105	2.61538	19.7162	7.73484e-05	0.0129223
ENSMUSG00000005442	ENSMUSG00000005442	71722	Cic	capicua transcriptional repressor	0.45263	3.48407	5.1264	0.0284847	0.339413
ENSMUSG00000024526	ENSMUSG00000024526	12683	Cidea	cell death-inducing DNA fragmentation factor, alpha subunit-like effector A	-2.0262	3.81969	10.3468	0.00274926	0.128966
ENSMUSG00000022219	ENSMUSG00000022219	12684	Cideb	cell death-inducing DNA fragmentation factor, alpha subunit-like effector B	-0.318781	8.18686	6.15852	0.0169211	0.277997
ENSMUSG00000030278	ENSMUSG00000030278	14311	Cidec	cell death-inducing DFFA-like effector c	-1.08726	4.82707	5.78378	0.021449	0.299367
ENSMUSG00000022504	ENSMUSG00000022504	12265	Ciita	class II transactivator	0.394772	1.59222	1.20386	0.278449	0.705698
ENSMUSG00000021276	ENSMUSG00000021276	67236	Cinp	cyclin-dependent kinase 2 interacting protein	-0.0976222	2.72233	0.256045	0.615347	0.885575
ENSMUSG00000034157	ENSMUSG00000034157	217732	Cipc	CLOCK interacting protein, circadian	-0.278448	4.33016	2.08337	0.15591	0.605343
ENSMUSG00000041777	ENSMUSG00000041777	66935	Cir1	corepressor interacting with RBPJ, 1	0.104002	6.24139	0.908502	0.345658	0.757154
ENSMUSG00000045193	ENSMUSG00000045193	12696	Cirbp	cold inducible RNA binding protein	0.418765	3.72939	2.18867	0.146621	0.594066
ENSMUSG00000037710	ENSMUSG00000037710	52637	Cisd1	CDGSH iron sulfur domain 1	-0.097092	8.24803	1.10355	0.299156	0.721948
ENSMUSG00000028165	ENSMUSG00000028165	67006	Cisd2	CDGSH iron sulfur domain 2	0.0265525	5.07093	0.0446007	0.833704	0.955628
ENSMUSG00000078695	ENSMUSG00000078695	217149	Cisd3	CDGSH iron sulfur domain 3	-0.0431118	6.29616	0.0701089	0.7924	0.943633
ENSMUSG00000032578	ENSMUSG00000032578	12700	Cish	cytokine inducible SH2-containing protein	0.710247	3.67547	1.86429	0.180549	0.632293
ENSMUSG00000029516	ENSMUSG00000029516	12704	Cit	citron	0.0156689	2.1929	0.00383449	0.950901	0.987605
ENSMUSG00000039910	ENSMUSG00000039910	17684	Cited2	Cbp/p300-interacting transactivator, with Glu/Asp-rich carboxy-terminal domain, 2	0.0303348	4.3193	0.023891	0.877861	0.966843
ENSMUSG00000039205	ENSMUSG00000039205	68379	Ciz1	CDKN1A interacting zinc finger protein 1	0.265394	3.69893	2.35479	0.131974	0.582485
ENSMUSG00000048327	ENSMUSG00000048327	70466	Ckap2l	cytoskeleton associated protein 2-like	-0.0489066	1.16172	0.00916151	0.924176	0.978363
ENSMUSG00000046841	ENSMUSG00000046841	216197	Ckap4	cytoskeleton-associated protein 4	-0.243152	2.26127	0.693977	0.409261	0.791615
ENSMUSG00000040549	ENSMUSG00000040549	75786	Ckap5	cytoskeleton associated protein 5	0.216101	2.54971	1.14767	0.28981	0.713353
ENSMUSG00000001270	ENSMUSG00000001270	12709	Ckb	creatine kinase, brain	0.326996	3.11355	2.46285	0.123647	0.56986
ENSMUSG00000054400	ENSMUSG00000054400	75458	Cklf	chemokine-like factor	0.281846	1.00979	0.53648	0.467733	0.822834
ENSMUSG00000028044	ENSMUSG00000028044	54124	Cks1b	CDC28 protein kinase 1b	-0.379023	2.79807	1.99789	0.164472	0.613542
ENSMUSG00000062248	ENSMUSG00000062248	66197	Cks2	CDC28 protein kinase regulatory subunit 2	0.145427	4.26128	0.355553	0.554203	0.856055
ENSMUSG00000064302	ENSMUSG00000064302	76707	Clasp1	CLIP associating protein 1	-0.138359	2.96627	0.381941	0.539714	0.85258
ENSMUSG00000033392	ENSMUSG00000033392	76499	Clasp2	CLIP associating protein 2	0.032055	3.69997	0.0235609	0.878701	0.967075
ENSMUSG00000061028	ENSMUSG00000061028	53609	Clasrp	CLK4-associating serine/arginine rich protein	0.017921	2.87245	0.00490781	0.944463	0.985023
ENSMUSG00000056025	ENSMUSG00000056025	12722	Clca3a1	chloride channel accessory 3A1	0.123553	2.30203	0.116936	0.734021	0.928513
ENSMUSG00000027884	ENSMUSG00000027884	229725	Clcc1	chloride channel CLIC-like 1	0.223965	5.55811	5.84826	0.019747	0.294477
ENSMUSG00000022843	ENSMUSG00000022843	12724	Clcn2	chloride channel, voltage-sensitive 2	-0.374937	3.35794	0.805215	0.375204	0.773883
ENSMUSG00000004319	ENSMUSG00000004319	12725	Clcn3	chloride channel, voltage-sensitive 3	0.20543	6.03497	4.65435	0.0364097	0.364341
ENSMUSG00000000605	ENSMUSG00000000605	12727	Clcn4	chloride channel, voltage-sensitive 4	-0.188906	5.85912	3.69469	0.0609986	0.447143
ENSMUSG00000004317	ENSMUSG00000004317	12728	Clcn5	chloride channel, voltage-sensitive 5	-0.0820637	3.53746	0.293805	0.590495	0.872138
ENSMUSG00000029016	ENSMUSG00000029016	26372	Clcn6	chloride channel, voltage-sensitive 6	-0.934217	0.966545	3.52563	0.0669863	0.457385
ENSMUSG00000036636	ENSMUSG00000036636	26373	Clcn7	chloride channel, voltage-sensitive 7	-0.350136	4.33706	7.7103	0.00800351	0.206043
ENSMUSG00000022512	ENSMUSG00000022512	12737	Cldn1	claudin 1	0.0647951	5.44158	0.0415069	0.839674	0.957156
ENSMUSG00000046798	ENSMUSG00000046798	64945	Cldn12	claudin 12	0.0558452	5.20774	0.243103	0.624397	0.889462
ENSMUSG00000047109	ENSMUSG00000047109	56173	Cldn14	claudin 14	-0.0549959	3.42905	0.0629708	0.803015	0.94695
ENSMUSG00000047230	ENSMUSG00000047230	12738	Cldn2	claudin 2	0.095488	6.2549	0.447261	0.507091	0.839702
ENSMUSG00000070473	ENSMUSG00000070473	12739	Cldn3	claudin 3	0.22591	6.68166	3.74013	0.0594916	0.443037
ENSMUSG00000041378	ENSMUSG00000041378	12741	Cldn5	claudin 5	0.131687	0.978479	0.098936	0.754579	0.933345
ENSMUSG00000022744	ENSMUSG00000022744	224250	Cldnd1	claudin domain containing 1	0.101183	4.14003	0.208987	0.649835	0.90079
ENSMUSG00000004473	ENSMUSG00000004473	20256	Clec11a	C-type lectin domain family 11, member a	-0.567502	2.24332	5.17869	0.0277289	0.335546
ENSMUSG00000053063	ENSMUSG00000053063	232413	Clec12a	C-type lectin domain family 12, member a	-0.530797	2.52945	3.46373	0.0693387	0.464013
ENSMUSG00000045930	ENSMUSG00000045930	66864	Clec14a	C-type lectin domain family 14, member a	-0.235195	2.86342	0.978981	0.327797	0.743907
ENSMUSG00000068663	ENSMUSG00000068663	74374	Clec16a	C-type lectin domain family 16, member A	0.271495	2.62946	1.06627	0.307366	0.728112
ENSMUSG00000033082	ENSMUSG00000033082	243653	Clec1a	C-type lectin domain family 1, member a	-0.102782	1.75237	0.122296	0.728206	0.92677
ENSMUSG00000030159	ENSMUSG00000030159	56760	Clec1b	C-type lectin domain family 1, member b	0.19389	3.09877	1.09322	0.301401	0.723483
ENSMUSG00000030157	ENSMUSG00000030157	93694	Clec2d	C-type lectin domain family 2, member d	0.0431893	2.82577	0.0201947	0.887643	0.969073
ENSMUSG00000030364	ENSMUSG00000030364	94071	Clec2h	C-type lectin domain family 2, member h	0.596346	3.2042	2.33589	0.134435	0.583368
ENSMUSG00000049037	ENSMUSG00000049037	269799	Clec4a1	C-type lectin domain family 4, member a1	0.696174	2.20228	3.62695	0.0633264	0.449706
ENSMUSG00000030148	ENSMUSG00000030148	26888	Clec4a2	C-type lectin domain family 4, member a2	0.945995	1.49889	3.91922	0.0540373	0.422906
ENSMUSG00000043832	ENSMUSG00000043832	73149	Clec4a3	C-type lectin domain family 4, member a3	-0.273493	2.03838	0.607028	0.44003	0.810607
ENSMUSG00000014542	ENSMUSG00000014542	51811	Clec4f	C-type lectin domain family 4, member f	0.246649	5.16345	1.15064	0.289733	0.713353
ENSMUSG00000074491	ENSMUSG00000074491	75863	Clec4g	C-type lectin domain family 4, member g	0.219121	5.50725	1.8107	0.185236	0.640851
ENSMUSG00000023349	ENSMUSG00000023349	56620	Clec4n	C-type lectin domain family 4, member n	0.31049	2.23486	0.913966	0.344226	0.755803
ENSMUSG00000079293	ENSMUSG00000079293	56644	Clec7a	C-type lectin domain family 7, member a	0.191539	3.91076	0.238948	0.627841	0.89118
ENSMUSG00000046080	ENSMUSG00000046080	232414	Clec9a	C-type lectin domain family 9, member a	0.627007	1.03112	1.86958	0.178387	0.630545
ENSMUSG00000007041	ENSMUSG00000007041	114584	Clic1	chloride intracellular channel 1	0.589958	2.94724	4.15558	0.0475081	0.401964
ENSMUSG00000037242	ENSMUSG00000037242	29876	Clic4	chloride intracellular channel 4 (mitochondrial)	-0.0210776	5.3947	0.0257915	0.873137	0.965875
ENSMUSG00000023959	ENSMUSG00000023959	224796	Clic5	chloride intracellular channel 5	0.113549	1.12228	0.0550725	0.815537	0.951329
ENSMUSG00000006169	ENSMUSG00000006169	216705	Clint1	clathrin interactor 1	0.209791	5.70433	2.25743	0.140034	0.587589
ENSMUSG00000049550	ENSMUSG00000049550	56430	Clip1	CAP-GLY domain containing linker protein 1	0.0896315	5.25327	0.484884	0.489837	0.831612
ENSMUSG00000026034	ENSMUSG00000026034	12747	Clk1	CDC-like kinase 1	0.162473	5.66072	2.3609	0.131487	0.582485
ENSMUSG00000068917	ENSMUSG00000068917	12748	Clk2	CDC-like kinase 2	0.199167	3.2142	1.54739	0.22003	0.667157
ENSMUSG00000032316	ENSMUSG00000032316	102414	Clk3	CDC-like kinase 3	0.294796	4.46135	3.25238	0.0780884	0.483159
ENSMUSG00000020385	ENSMUSG00000020385	12750	Clk4	CDC like kinase 4	0.0475351	4.47833	0.170698	0.681475	0.91189
ENSMUSG00000021097	ENSMUSG00000021097	94040	Clmn	calmin	0.37257	7.63578	5.19045	0.0275638	0.334481
ENSMUSG00000032024	ENSMUSG00000032024	71566	Clmp	CXADR-like membrane protein	0.990041	2.19014	8.54404	0.00543073	0.178251
ENSMUSG00000030720	ENSMUSG00000030720	12752	Cln3	ceroid lipofuscinosis, neuronal 3, juvenile (Batten, Spielmeyer-Vogt disease)	0.231481	3.54591	1.58286	0.214906	0.665228
ENSMUSG00000022125	ENSMUSG00000022125	211286	Cln5	ceroid-lipofuscinosis, neuronal 5	-0.4763	4.79733	8.16925	0.00645758	0.186939
ENSMUSG00000032245	ENSMUSG00000032245	76524	Cln6	ceroid-lipofuscinosis, neuronal 6	0.607261	1.83066	3.16986	0.0818325	0.490461
ENSMUSG00000026317	ENSMUSG00000026317	26889	Cln8	ceroid-lipofuscinosis, neuronal 8	0.0523611	4.26974	0.139677	0.710376	0.921144
ENSMUSG00000025439	ENSMUSG00000025439	12729	Clns1a	chloride channel, nucleotide-sensitive, 1A	0.00183745	4.81342	0.000217111	0.98831	0.99674
ENSMUSG00000029238	ENSMUSG00000029238	12753	Clock	circadian locomotor output cycles kaput	0.184661	5.03427	1.44276	0.236043	0.675103
ENSMUSG00000027079	ENSMUSG00000027079	98985	Clp1	CLP1, cleavage and polyadenylation factor I subunit	-0.244648	2.6832	1.01339	0.319531	0.736834
ENSMUSG00000001829	ENSMUSG00000001829	20480	Clpb	ClpB caseinolytic peptidase B	-0.252926	5.05068	2.28092	0.138039	0.584816
ENSMUSG00000002660	ENSMUSG00000002660	53895	Clpp	caseinolytic mitochondrial matrix peptidase proteolytic subunit	0.0587585	5.52945	0.223884	0.638408	0.895377
ENSMUSG00000002981	ENSMUSG00000002981	56457	Clptm1	cleft lip and palate associated transmembrane protein 1	0.225656	5.1019	2.90712	0.0951576	0.518214
ENSMUSG00000021610	ENSMUSG00000021610	218335	Clptm1l	CLPTM1-like	-0.316527	5.81605	5.0771	0.0292177	0.342447
ENSMUSG00000015357	ENSMUSG00000015357	270166	Clpx	caseinolytic mitochondrial matrix peptidase chaperone subunit	-0.23095	6.3747	0.383412	0.539665	0.85258
ENSMUSG00000039953	ENSMUSG00000039953	65945	Clstn1	calsyntenin 1	0.550589	1.82582	2.17088	0.147681	0.594979
ENSMUSG00000008153	ENSMUSG00000008153	232370	Clstn3	calsyntenin 3	-0.27651	3.67691	0.690238	0.411097	0.793651
ENSMUSG00000028478	ENSMUSG00000028478	12757	Clta	clathrin, light polypeptide (Lca)	0.182285	6.65634	2.53047	0.118742	0.561068
ENSMUSG00000047547	ENSMUSG00000047547	74325	Cltb	clathrin, light polypeptide (Lcb)	0.101635	5.23029	0.739834	0.394321	0.783875
ENSMUSG00000047126	ENSMUSG00000047126	67300	Cltc	clathrin, heavy polypeptide (Hc)	-0.131202	6.96795	2.08312	0.155935	0.605343
ENSMUSG00000022037	ENSMUSG00000022037	12759	Clu	clusterin	0.324371	10.4022	9.62509	0.00332803	0.138949
ENSMUSG00000014232	ENSMUSG00000014232	76779	Cluap1	clusterin associated protein 1	0.0332711	2.90936	0.0359326	0.850516	0.957896
ENSMUSG00000020741	ENSMUSG00000020741	74148	Cluh	clustered mitochondria (cluA/CLU1) homolog	0.267768	7.71064	6.17729	0.0167647	0.277546
ENSMUSG00000025545	ENSMUSG00000025545	69634	Clybl	citrate lyase beta like	0.0420762	5.74914	0.0354368	0.851628	0.958917
ENSMUSG00000016756	ENSMUSG00000016756	12763	Cmah	cytidine monophospho-N-acetylneuraminic acid hydroxylase	0.280218	5.93052	4.01611	0.0511736	0.41498
ENSMUSG00000030282	ENSMUSG00000030282	12764	Cmas	cytidine monophospho-N-acetylneuraminic acid synthetase	0.0535045	6.06865	0.299294	0.587057	0.870998
ENSMUSG00000022235	ENSMUSG00000022235	69574	Cmbl	carboxymethylenebutenolidase-like (Pseudomonas)	-0.301089	7.15665	8.36231	0.00590511	0.183656
ENSMUSG00000039163	ENSMUSG00000039163	67899	Cmc1	COX assembly mitochondrial protein 1	-0.298235	4.66723	2.22803	0.142683	0.58996
ENSMUSG00000014633	ENSMUSG00000014633	66531	Cmc2	COX assembly mitochondrial protein 2	-0.0295043	3.98556	0.0288528	0.865889	0.963413
ENSMUSG00000090110	ENSMUSG00000090110	105886298	Cmc4	C-x(9)-C motif containing 4	-0.695022	1.93991	4.20223	0.0462876	0.397209
ENSMUSG00000034390	ENSMUSG00000034390	74440	Cmip	c-Maf inducing protein	0.131077	5.37922	0.472546	0.495492	0.832841
ENSMUSG00000042190	ENSMUSG00000042190	14747	Cmklr1	chemokine-like receptor 1	0.0526556	1.50753	0.019046	0.890857	0.9698
ENSMUSG00000028719	ENSMUSG00000028719	66588	Cmpk1	cytidine monophosphate (UMP-CMP) kinase 1	-0.287274	4.93323	1.9605	0.168663	0.619658
ENSMUSG00000020638	ENSMUSG00000020638	22169	Cmpk2	cytidine monophosphate (UMP-CMP) kinase 2, mitochondrial	-0.0570172	2.98194	0.0345242	0.853468	0.959593
ENSMUSG00000022748	ENSMUSG00000022748	66497	Cmss1	cms small ribosomal subunit 1	0.38932	2.01187	2.13548	0.150947	0.599056
ENSMUSG00000031875	ENSMUSG00000031875	68119	Cmtm3	CKLF-like MARVEL transmembrane domain containing 3	-0.546743	2.79472	4.79145	0.0338869	0.35997
ENSMUSG00000096188	ENSMUSG00000096188	97487	Cmtm4	CKLF-like MARVEL transmembrane domain containing 4	-0.464118	4.76161	7.87186	0.00741867	0.199318
ENSMUSG00000032434	ENSMUSG00000032434	67213	Cmtm6	CKLF-like MARVEL transmembrane domain containing 6	-0.27595	5.59918	1.21306	0.277453	0.704833
ENSMUSG00000041012	ENSMUSG00000041012	70031	Cmtm8	CKLF-like MARVEL transmembrane domain containing 8	0.00629829	7.33797	0.00356968	0.952625	0.987972
ENSMUSG00000024019	ENSMUSG00000024019	74157	Cmtr1	cap methyltransferase 1	0.519034	3.14436	7.08137	0.0107923	0.233204
ENSMUSG00000046441	ENSMUSG00000046441	234728	Cmtr2	cap methyltransferase 2	0.0103709	0.929769	0.000468971	0.982819	0.996593
ENSMUSG00000030057	ENSMUSG00000030057	12785	Cnbp	cellular nucleic acid binding protein	-0.0949284	6.50074	0.586815	0.447695	0.812384
ENSMUSG00000024644	ENSMUSG00000024644	66054	Cndp2	CNDP dipeptidase 2 (metallopeptidase M20 family)	0.0034555	3.70824	0.000382797	0.984478	0.996593
ENSMUSG00000036810	ENSMUSG00000036810	382030	Cnep1r1	CTD nuclear envelope phosphatase 1 regulatory subunit 1	-0.246863	3.83783	0.916187	0.343923	0.755605
ENSMUSG00000015759	ENSMUSG00000015759	12793	Cnih1	cornichon family AMPA receptor auxiliary protein 1	-0.136448	5.72292	1.79188	0.187492	0.643058
ENSMUSG00000062169	ENSMUSG00000062169	98417	Cnih4	cornichon family AMPA receptor auxiliary protein 4	-0.0652071	4.55953	0.408084	0.526216	0.847316
ENSMUSG00000015202	ENSMUSG00000015202	215748	Cnksr3	Cnksr family member 3	0.0652063	2.07394	0.0327421	0.85723	0.960751
ENSMUSG00000022025	ENSMUSG00000022025	16840	Cnmd	chondromodulin	0.0965694	1.99896	0.0362204	0.849998	0.957896
ENSMUSG00000004665	ENSMUSG00000004665	12798	Cnn2	calponin 2	-0.12236	2.27052	0.214919	0.645197	0.898474
ENSMUSG00000053931	ENSMUSG00000053931	71994	Cnn3	calponin 3, acidic	-0.119617	6.42361	1.0802	0.304264	0.725661
ENSMUSG00000064105	ENSMUSG00000064105	94219	Cnnm2	cyclin M2	0.00915229	2.37409	0.00183607	0.966013	0.992104
ENSMUSG00000001138	ENSMUSG00000001138	94218	Cnnm3	cyclin M3	0.327872	4.09757	4.1532	0.0475231	0.401964
ENSMUSG00000037408	ENSMUSG00000037408	94220	Cnnm4	cyclin M4	0.450884	1.08194	0.872175	0.355391	0.763084
ENSMUSG00000036550	ENSMUSG00000036550	234594	Cnot1	CCR4-NOT transcription complex, subunit 1	0.143436	5.27525	1.70662	0.198133	0.65115
ENSMUSG00000056167	ENSMUSG00000056167	78893	Cnot10	CCR4-NOT transcription complex, subunit 10	0.181425	3.4054	1.03221	0.31513	0.733536
ENSMUSG00000003135	ENSMUSG00000003135	52846	Cnot11	CCR4-NOT transcription complex, subunit 11	-0.179771	2.65455	0.591082	0.44606	0.812384
ENSMUSG00000020166	ENSMUSG00000020166	72068	Cnot2	CCR4-NOT transcription complex, subunit 2	0.216675	4.2389	1.63921	0.207063	0.659818
ENSMUSG00000035632	ENSMUSG00000035632	232791	Cnot3	CCR4-NOT transcription complex, subunit 3	0.416069	4.8064	7.73578	0.0079081	0.205789
ENSMUSG00000038784	ENSMUSG00000038784	53621	Cnot4	CCR4-NOT transcription complex, subunit 4	-0.0747002	3.5673	0.155042	0.695642	0.916474
ENSMUSG00000020362	ENSMUSG00000020362	104625	Cnot6	CCR4-NOT transcription complex, subunit 6	-0.101801	5.45374	0.783811	0.380734	0.779209
ENSMUSG00000034724	ENSMUSG00000034724	231464	Cnot6l	CCR4-NOT transcription complex, subunit 6-like	0.189084	6.01169	3.40365	0.0717096	0.472516
ENSMUSG00000031601	ENSMUSG00000031601	18983	Cnot7	CCR4-NOT transcription complex, subunit 7	-0.264494	4.30372	2.74278	0.104726	0.53639
ENSMUSG00000020515	ENSMUSG00000020515	69125	Cnot8	CCR4-NOT transcription complex, subunit 8	-0.0417533	4.39934	0.0543993	0.816647	0.951329
ENSMUSG00000026174	ENSMUSG00000026174	58184	Cnot9	CCR4-NOT transcription complex, subunit 9	0.115324	2.97088	0.369731	0.54624	0.85328
ENSMUSG00000006782	ENSMUSG00000006782	12799	Cnp	2',3'-cyclic nucleotide 3' phosphodiesterase	0.487516	2.8968	5.27128	0.0264433	0.327165
ENSMUSG00000033159	ENSMUSG00000033159	69171	Cnppd1	cyclin Pas1/PHO80 domain containing 1	0.36637	6.60738	11.8743	0.00125274	0.0792986
ENSMUSG00000025381	ENSMUSG00000025381	56530	Cnpy2	canopy FGF signaling regulator 2	0.088061	6.53438	0.784948	0.380392	0.778805
ENSMUSG00000023973	ENSMUSG00000023973	72029	Cnpy3	canopy FGF signaling regulator 3	-0.0877624	5.49715	0.4719	0.495677	0.832841
ENSMUSG00000036968	ENSMUSG00000036968	66455	Cnpy4	canopy FGF signaling regulator 4	0.0480983	2.31851	0.0234383	0.879015	0.967075
ENSMUSG00000044629	ENSMUSG00000044629	380686	Cnrip1	cannabinoid receptor interacting protein 1	-0.191054	1.19774	0.370656	0.54574	0.85328
ENSMUSG00000038949	ENSMUSG00000038949	226744	Cnst	consortin, connexin sorting protein	0.00778614	2.1527	0.00123908	0.972077	0.994063
ENSMUSG00000038070	ENSMUSG00000038070	338349	Cntln	centlein, centrosomal protein	-0.201547	1.91445	0.411173	0.524662	0.847187
ENSMUSG00000017167	ENSMUSG00000017167	53321	Cntnap1	contactin associated protein-like 1	-0.746256	1.61376	2.9807	0.0911955	0.509064
ENSMUSG00000057110	ENSMUSG00000057110	26920	Cntrl	centriolin	0.173356	4.59457	2.18225	0.146649	0.594066
ENSMUSG00000032782	ENSMUSG00000032782	216846	Cntrob	centrobin, centrosomal BRCA2 interacting protein	0.0386797	1.79472	0.00795548	0.92933	0.980035
ENSMUSG00000017188	ENSMUSG00000017188	52469	Coa3	cytochrome C oxidase assembly factor 3	0.154529	5.44273	1.01867	0.318289	0.735546
ENSMUSG00000044881	ENSMUSG00000044881	68185	Coa4	cytochrome c oxidase assembly factor 4	0.256426	2.66756	1.09628	0.300735	0.72288
ENSMUSG00000026112	ENSMUSG00000026112	76178	Coa5	cytochrome C oxidase assembly factor 5	-0.124196	5.80798	1.4502	0.234858	0.674612
ENSMUSG00000051671	ENSMUSG00000051671	67892	Coa6	cytochrome c oxidase assembly factor 6	-0.149605	4.06389	0.385619	0.537928	0.851877
ENSMUSG00000048351	ENSMUSG00000048351	69893	Coa7	cytochrome c oxidase assembly factor 7	0.0707351	4.98974	0.40738	0.526572	0.847327
ENSMUSG00000001755	ENSMUSG00000001755	71743	Coasy	Coenzyme A synthase	0.16498	7.01636	1.30395	0.259596	0.689554
ENSMUSG00000020173	ENSMUSG00000020173	12808	Cobl	cordon-bleu WH2 repeat	0.803731	3.25068	18.1596	0.000103846	0.0161954
ENSMUSG00000034903	ENSMUSG00000034903	319876	Cobll1	Cobl-like 1	-0.0780397	4.93147	0.261556	0.61158	0.883029
ENSMUSG00000018661	ENSMUSG00000018661	16834	Cog1	component of oligomeric golgi complex 1	0.119195	3.12386	0.385534	0.537822	0.851877
ENSMUSG00000031979	ENSMUSG00000031979	76332	Cog2	component of oligomeric golgi complex 2	0.0502584	4.1408	0.111824	0.739647	0.93059
ENSMUSG00000034893	ENSMUSG00000034893	338337	Cog3	component of oligomeric golgi complex 3	-0.422616	2.1551	1.44327	0.235963	0.675103
ENSMUSG00000031753	ENSMUSG00000031753	102339	Cog4	component of oligomeric golgi complex 4	0.0362242	5.20191	0.0340575	0.854451	0.959686
ENSMUSG00000035933	ENSMUSG00000035933	238123	Cog5	component of oligomeric golgi complex 5	-0.233769	4.11904	2.48895	0.121727	0.567302
ENSMUSG00000027742	ENSMUSG00000027742	67542	Cog6	component of oligomeric golgi complex 6	-0.447803	3.35345	3.24015	0.0786309	0.48382
ENSMUSG00000034951	ENSMUSG00000034951	233824	Cog7	component of oligomeric golgi complex 7	-0.273523	4.0005	3.01658	0.0893311	0.507413
ENSMUSG00000031916	ENSMUSG00000031916	97484	Cog8	component of oligomeric golgi complex 8	-0.272976	5.12344	6.7016	0.0129648	0.252297
ENSMUSG00000033983	ENSMUSG00000033983	12812	Coil	coilin	-0.0326053	1.68692	0.0109559	0.917108	0.97727
ENSMUSG00000058806	ENSMUSG00000058806	12817	Col13a1	collagen, type XIII, alpha 1	0.122008	2.36657	0.141173	0.708902	0.921042
ENSMUSG00000022371	ENSMUSG00000022371	12818	Col14a1	collagen, type XIV, alpha 1	-0.115412	5.62674	0.36007	0.551641	0.85583
ENSMUSG00000028339	ENSMUSG00000028339	12819	Col15a1	collagen, type XV, alpha 1	0.804547	1.71998	3.23076	0.0791588	0.484544
ENSMUSG00000040690	ENSMUSG00000040690	107581	Col16a1	collagen, type XVI, alpha 1	0.19841	1.99233	0.334389	0.566	0.861063
ENSMUSG00000001435	ENSMUSG00000001435	12822	Col18a1	collagen, type XVIII, alpha 1	0.0814282	8.58756	0.525458	0.472315	0.825033
ENSMUSG00000001506	ENSMUSG00000001506	12842	Col1a1	collagen, type I, alpha 1	0.00658073	4.80691	0.000140388	0.990612	0.997096
ENSMUSG00000029661	ENSMUSG00000029661	12843	Col1a2	collagen, type I, alpha 2	-0.0479469	5.13119	0.0102541	0.919906	0.977497
ENSMUSG00000045672	ENSMUSG00000045672	373864	Col27a1	collagen, type XXVII, alpha 1	-0.202671	5.04175	0.679915	0.4145	0.795512
ENSMUSG00000026043	ENSMUSG00000026043	12825	Col3a1	collagen, type III, alpha 1	-0.093911	5.72433	0.0361532	0.850272	0.957896
ENSMUSG00000031502	ENSMUSG00000031502	12826	Col4a1	collagen, type IV, alpha 1	0.0852995	5.10859	0.101863	0.751316	0.933152
ENSMUSG00000031503	ENSMUSG00000031503	12827	Col4a2	collagen, type IV, alpha 2	-0.00461134	4.06648	0.000546652	0.981451	0.996593
ENSMUSG00000021669	ENSMUSG00000021669	68018	Col4a3bp	collagen, type IV, alpha 3 (Goodpasture antigen) binding protein	0.0304609	4.48723	0.0162002	0.899335	0.972149
ENSMUSG00000026837	ENSMUSG00000026837	12831	Col5a1	collagen, type V, alpha 1	-0.0876808	3.14112	0.0875098	0.768802	0.937908
ENSMUSG00000026042	ENSMUSG00000026042	12832	Col5a2	collagen, type V, alpha 2	-0.0684497	2.08281	0.0142654	0.905551	0.973786
ENSMUSG00000004098	ENSMUSG00000004098	53867	Col5a3	collagen, type V, alpha 3	-0.207447	4.79481	1.25151	0.269263	0.69869
ENSMUSG00000001119	ENSMUSG00000001119	12833	Col6a1	collagen, type VI, alpha 1	0.0300012	2.01919	0.00677053	0.93479	0.981903
ENSMUSG00000020241	ENSMUSG00000020241	12834	Col6a2	collagen, type VI, alpha 2	0.635947	2.22197	2.05636	0.159153	0.608399
ENSMUSG00000048126	ENSMUSG00000048126	12835	Col6a3	collagen, type VI, alpha 3	0.502366	4.07854	1.12259	0.296391	0.719751
ENSMUSG00000038591	ENSMUSG00000038591	239447	Colec10	collectin sub-family member 10	-0.191296	4.1942	0.397059	0.532287	0.849271
ENSMUSG00000036655	ENSMUSG00000036655	71693	Colec11	collectin sub-family member 11	-0.128699	5.17512	0.631757	0.430928	0.805531
ENSMUSG00000036103	ENSMUSG00000036103	140792	Colec12	collectin sub-family member 12	-0.111728	3.88849	0.391191	0.534867	0.850806
ENSMUSG00000034807	ENSMUSG00000034807	234407	Colgalt1	collagen beta(1-O)galactosyltransferase 1	0.185923	5.77376	1.44036	0.236427	0.675103
ENSMUSG00000051355	ENSMUSG00000051355	17846	Commd1	COMM domain containing 1	-0.0850402	4.08208	0.125179	0.725237	0.925634
ENSMUSG00000042705	ENSMUSG00000042705	69456	Commd10	COMM domain containing 10	-0.522645	2.88371	4.25558	0.0449826	0.393049
ENSMUSG00000036513	ENSMUSG00000036513	52245	Commd2	COMM domain containing 2	-0.407147	5.15001	4.97856	0.0307758	0.347877
ENSMUSG00000051154	ENSMUSG00000051154	12238	Commd3	COMM domain containing 3	-0.112355	6.27428	1.11434	0.296834	0.72029
ENSMUSG00000032299	ENSMUSG00000032299	66199	Commd4	COMM domain containing 4	0.190508	4.35034	1.70149	0.198795	0.652206
ENSMUSG00000075486	ENSMUSG00000075486	66200	Commd6	COMM domain containing 6	-0.318435	4.78141	5.54877	0.0229602	0.306925
ENSMUSG00000056941	ENSMUSG00000056941	99311	Commd7	COMM domain containing 7	0.149374	4.34013	1.15086	0.28915	0.713353
ENSMUSG00000029213	ENSMUSG00000029213	27784	Commd8	COMM domain containing 8	0.0586857	4.13769	0.173856	0.67871	0.911356
ENSMUSG00000027163	ENSMUSG00000027163	76501	Commd9	COMM domain containing 9	-0.0674932	3.56421	0.116866	0.734067	0.928513
ENSMUSG00000000326	ENSMUSG00000000326	12846	Comt	catechol-O-methyltransferase	0.152903	9.40138	1.80437	0.185991	0.641349
ENSMUSG00000021773	ENSMUSG00000021773	69156	Comtd1	catechol-O-methyltransferase domain containing 1	0.121334	2.99079	0.196165	0.659979	0.905686
ENSMUSG00000040782	ENSMUSG00000040782	26374	Cop1	COP1, E3 ubiquitin ligase	0.0231101	4.8679	0.0454875	0.832084	0.954922
ENSMUSG00000026553	ENSMUSG00000026553	12847	Copa	coatomer protein complex subunit alpha	-0.161869	6.95507	1.70941	0.197773	0.651018
ENSMUSG00000030754	ENSMUSG00000030754	70349	Copb1	coatomer protein complex, subunit beta 1	-0.0170199	5.53998	0.0180804	0.893642	0.970406
ENSMUSG00000032458	ENSMUSG00000032458	50797	Copb2	coatomer protein complex, subunit beta 2 (beta prime)	-0.11019	6.17474	1.4767	0.230695	0.671018
ENSMUSG00000055681	ENSMUSG00000055681	59042	Cope	coatomer protein complex, subunit epsilon	0.102317	6.04923	0.487751	0.488564	0.831142
ENSMUSG00000030058	ENSMUSG00000030058	54161	Copg1	coatomer protein complex, subunit gamma 1	0.125024	4.90181	1.09521	0.300968	0.723089
ENSMUSG00000025607	ENSMUSG00000025607	54160	Copg2	coatomer protein complex, subunit gamma 2	0.169239	3.76119	0.683338	0.412847	0.794584
ENSMUSG00000031458	ENSMUSG00000031458	66423	Coprs	coordinator of PRMT5, differentiation stimulator	-0.16497	2.44054	0.412576	0.523958	0.847079
ENSMUSG00000027206	ENSMUSG00000027206	12848	Cops2	COP9 signalosome subunit 2	0.20081	4.7554	2.16848	0.147899	0.595191
ENSMUSG00000019373	ENSMUSG00000019373	26572	Cops3	COP9 signalosome subunit 3	-0.0595765	4.85884	0.168809	0.683143	0.91189
ENSMUSG00000035297	ENSMUSG00000035297	26891	Cops4	COP9 signalosome subunit 4	0.0711024	4.43796	0.338856	0.563426	0.859856
ENSMUSG00000025917	ENSMUSG00000025917	26754	Cops5	COP9 signalosome subunit 5	-0.0133152	5.75461	0.010451	0.919033	0.97727
ENSMUSG00000019494	ENSMUSG00000019494	26893	Cops6	COP9 signalosome subunit 6	-0.0173967	5.43483	0.0242968	0.876837	0.966843
ENSMUSG00000030127	ENSMUSG00000030127	26894	Cops7a	COP9 signalosome subunit 7A	-0.190012	4.51951	0.449705	0.506413	0.839435
ENSMUSG00000026240	ENSMUSG00000026240	26895	Cops7b	COP9 signalosome subunit 7B	0.359808	3.61516	4.59532	0.0375582	0.367194
ENSMUSG00000034432	ENSMUSG00000034432	108679	Cops8	COP9 signalosome subunit 8	-0.0986212	4.51652	0.72715	0.398372	0.78705
ENSMUSG00000073616	ENSMUSG00000073616	66915	Cops9	COP9 signalosome subunit 9	-0.0511085	6.60485	0.16185	0.689384	0.914325
ENSMUSG00000060992	ENSMUSG00000060992	56447	Copz1	coatomer protein complex, subunit zeta 1	0.0370164	6.82125	0.113658	0.737601	0.929946
ENSMUSG00000018672	ENSMUSG00000018672	56358	Copz2	coatomer protein complex, subunit zeta 2	-0.305551	3.3865	2.35019	0.132343	0.582485
ENSMUSG00000039914	ENSMUSG00000039914	210582	Coq10a	coenzyme Q10A	0.127523	4.13453	0.471402	0.495903	0.833034
ENSMUSG00000025981	ENSMUSG00000025981	67876	Coq10b	coenzyme Q10B	-0.34712	3.61325	0.88941	0.351559	0.760509
ENSMUSG00000029319	ENSMUSG00000029319	71883	Coq2	coenzyme Q2 4-hydroxybenzoate polyprenyltransferase	-0.396006	4.7908	6.7174	0.0128656	0.252297
ENSMUSG00000028247	ENSMUSG00000028247	230027	Coq3	coenzyme Q3 methyltransferase	-0.0781067	3.9227	0.305133	0.583444	0.869668
ENSMUSG00000026798	ENSMUSG00000026798	227683	Coq4	coenzyme Q4	-0.0369821	2.35174	0.0214722	0.884161	0.968294
ENSMUSG00000041733	ENSMUSG00000041733	52064	Coq5	coenzyme Q5 methyltransferase	0.11749	4.9093	0.884203	0.352126	0.761196
ENSMUSG00000021235	ENSMUSG00000021235	217707	Coq6	coenzyme Q6 monooxygenase	-0.256754	3.09832	1.96165	0.168267	0.619475
ENSMUSG00000030652	ENSMUSG00000030652	12850	Coq7	demethyl-Q 7	-0.0555879	5.01566	0.1863	0.668097	0.907751
ENSMUSG00000026489	ENSMUSG00000026489	67426	Coq8a	coenzyme Q8A	0.191664	6.62278	1.81911	0.184239	0.639144
ENSMUSG00000003762	ENSMUSG00000003762	76889	Coq8b	coenzyme Q8B	0.64785	3.03563	6.76597	0.0125659	0.249486
ENSMUSG00000031782	ENSMUSG00000031782	67914	Coq9	coenzyme Q9	-0.196486	5.77424	2.34141	0.13305	0.582485
ENSMUSG00000005220	ENSMUSG00000005220	53419	Corin	corin, serine peptidase	-1.44592	0.467344	6.92029	0.0116621	0.24274
ENSMUSG00000030707	ENSMUSG00000030707	12721	Coro1a	coronin, actin binding protein 1A	0.235212	1.92425	0.473234	0.495071	0.832841
ENSMUSG00000004530	ENSMUSG00000004530	23790	Coro1c	coronin, actin binding protein 1C	0.0563107	4.61788	0.10619	0.746051	0.932214
ENSMUSG00000041729	ENSMUSG00000041729	235431	Coro2b	coronin, actin binding protein, 2B	0.666725	1.14114	2.62815	0.112045	0.551188
ENSMUSG00000039637	ENSMUSG00000039637	78885	Coro7	coronin 7	-0.0184386	3.44448	0.00795739	0.92932	0.980035
ENSMUSG00000031827	ENSMUSG00000031827	72042	Cotl1	coactosin-like 1 (Dictyostelium)	0.124028	4.43515	0.408309	0.526102	0.847316
ENSMUSG00000064351	ENSMUSG00000064351	17708	COX1	cytochrome c oxidase subunit I	0.0483368	13.0182	0.0364112	0.84962	0.957896
ENSMUSG00000042148	ENSMUSG00000042148	70383	Cox10	heme A:farnesyltransferase cytochrome c oxidase assembly factor 10	0.224104	4.52463	2.00482	0.163757	0.613361
ENSMUSG00000020544	ENSMUSG00000020544	69802	Cox11	cytochrome c oxidase assembly protein 11, copper chaperone	0.176793	3.06203	0.781163	0.381533	0.77927
ENSMUSG00000023020	ENSMUSG00000023020	66379	Cox14	cytochrome c oxidase assembly protein 14	0.121115	5.51596	1.2605	0.267573	0.697113
ENSMUSG00000040018	ENSMUSG00000040018	226139	Cox15	cytochrome c oxidase assembly protein 15	-0.430635	4.01472	3.69342	0.0611429	0.447204
ENSMUSG00000091803	ENSMUSG00000091803	66272	Cox16	cytochrome c oxidase assembly protein 16	0.168019	1.26786	0.103106	0.749654	0.932989
ENSMUSG00000046516	ENSMUSG00000046516	12856	Cox17	cytochrome c oxidase assembly protein 17, copper chaperone	-0.150456	4.32552	0.439554	0.51091	0.841945
ENSMUSG00000035505	ENSMUSG00000035505	231430	Cox18	cytochrome c oxidase assembly protein 18	-0.210551	3.41196	1.69413	0.199752	0.653749
ENSMUSG00000045438	ENSMUSG00000045438	68033	Cox19	cytochrome c oxidase assembly protein 19	-0.0409427	5.59047	0.118943	0.731808	0.928286
ENSMUSG00000064354	ENSMUSG00000064354	17709	COX2	cytochrome c oxidase subunit II	-0.22323	13.8472	1.86119	0.179344	0.630898
ENSMUSG00000026500	ENSMUSG00000026500	66359	Cox20	cytochrome c oxidase assembly protein 20	-0.0863919	6.13609	0.499393	0.483449	0.829294
ENSMUSG00000064358	ENSMUSG00000064358	17710	COX3	cytochrome c oxidase subunit III	-0.0158534	14.3859	0.0150564	0.902893	0.972934
ENSMUSG00000031818	ENSMUSG00000031818	12857	Cox4i1	cytochrome c oxidase subunit 4I1	0.254072	8.79454	2.45647	0.124121	0.570296
ENSMUSG00000000088	ENSMUSG00000000088	12858	Cox5a	cytochrome c oxidase subunit 5A	0.100687	8.13123	0.486566	0.48909	0.831321
ENSMUSG00000061518	ENSMUSG00000061518	12859	Cox5b	cytochrome c oxidase subunit 5B	-0.106337	8.35109	1.39366	0.244055	0.679697
ENSMUSG00000041697	ENSMUSG00000041697	12861	Cox6a1	cytochrome c oxidase subunit 6A1	-0.0332074	9.13928	0.0944058	0.760081	0.934951
ENSMUSG00000036751	ENSMUSG00000036751	110323	Cox6b1	cytochrome c oxidase, subunit 6B1	0.0252512	8.5786	0.0922942	0.762696	0.935633
ENSMUSG00000014313	ENSMUSG00000014313	12864	Cox6c	cytochrome c oxidase subunit 6C	-0.107248	9.61508	0.766794	0.38591	0.780411
ENSMUSG00000074218	ENSMUSG00000074218	12865	Cox7a1	cytochrome c oxidase subunit 7A1	-0.553083	1.60318	2.29352	0.136981	0.584803
ENSMUSG00000032330	ENSMUSG00000032330	12866	Cox7a2	cytochrome c oxidase subunit 7A2	0.0576939	8.95689	0.304655	0.583738	0.869668
ENSMUSG00000024248	ENSMUSG00000024248	20463	Cox7a2l	cytochrome c oxidase subunit 7A2 like	0.216519	7.22846	2.76223	0.103539	0.53289
ENSMUSG00000031231	ENSMUSG00000031231	66142	Cox7b	cytochrome c oxidase subunit 7B	-0.150645	8.1258	1.39653	0.243578	0.679697
ENSMUSG00000017778	ENSMUSG00000017778	12867	Cox7c	cytochrome c oxidase subunit 7C	-0.372114	9.98747	1.34161	0.254143	0.685357
ENSMUSG00000035885	ENSMUSG00000035885	12868	Cox8a	cytochrome c oxidase subunit 8A	0.109073	9.12049	0.992676	0.324473	0.740338
ENSMUSG00000003617	ENSMUSG00000003617	12870	Cp	ceruloplasmin	-0.0289675	10.2821	0.0830933	0.774486	0.940023
ENSMUSG00000021999	ENSMUSG00000021999	56373	Cpb2	carboxypeptidase B2 (plasma)	0.026926	8.32041	0.0509725	0.822413	0.952553
ENSMUSG00000020841	ENSMUSG00000020841	12874	Cpd	carboxypeptidase D	0.202888	4.37876	1.75514	0.19199	0.646732
ENSMUSG00000025586	ENSMUSG00000025586	12877	Cpeb1	cytoplasmic polyadenylation element binding protein 1	-0.0330905	3.07146	0.0173008	0.895947	0.971165
ENSMUSG00000039782	ENSMUSG00000039782	231207	Cpeb2	cytoplasmic polyadenylation element binding protein 2	-0.0401051	4.34111	0.0199443	0.888409	0.969073
ENSMUSG00000039652	ENSMUSG00000039652	208922	Cpeb3	cytoplasmic polyadenylation element binding protein 3	0.29308	4.2909	3.3281	0.0748201	0.475851
ENSMUSG00000020300	ENSMUSG00000020300	67579	Cpeb4	cytoplasmic polyadenylation element binding protein 4	0.000330841	5.00227	3.56819e-06	0.998501	0.999337
ENSMUSG00000062980	ENSMUSG00000062980	214642	Cped1	cadherin-like and PC-esterase domain containing 1	0.146835	5.46076	1.43162	0.237832	0.676709
ENSMUSG00000098463	ENSMUSG00000098463	100039213	Cphx2	cytoplasmic polyadenylated homeobox 2	-0.0428026	0.865264	0.00936032	0.92336	0.978071
ENSMUSG00000039801	ENSMUSG00000039801	73692	Cplane1	ciliogenesis and planar polarity effector 1	0.297064	2.50464	0.968012	0.330492	0.745895
ENSMUSG00000020183	ENSMUSG00000020183	70574	Cpm	carboxypeptidase M	0.169754	1.46967	0.442371	0.509411	0.841247
ENSMUSG00000025196	ENSMUSG00000025196	93721	Cpn1	carboxypeptidase N, polypeptide 1	0.260318	8.1147	5.41865	0.0245277	0.315857
ENSMUSG00000023176	ENSMUSG00000023176	71756	Cpn2	carboxypeptidase N, polypeptide 2	0.159475	7.17916	2.45944	0.1239	0.56986
ENSMUSG00000034361	ENSMUSG00000034361	234577	Cpne2	copine II	0.246493	3.08319	2.03692	0.160495	0.609579
ENSMUSG00000028228	ENSMUSG00000028228	70568	Cpne3	copine III	-0.0382325	5.72523	0.0967506	0.757216	0.934343
ENSMUSG00000052560	ENSMUSG00000052560	66871	Cpne8	copine VIII	0.56445	2.88647	5.19267	0.0275306	0.334481
ENSMUSG00000022742	ENSMUSG00000022742	12892	Cpox	coproporphyrinogen oxidase	-0.124349	7.51909	0.968728	0.330316	0.745653
ENSMUSG00000065979	ENSMUSG00000065979	223978	Cpped1	calcineurin-like phosphoesterase domain containing 1	-0.392343	5.12957	2.79338	0.102377	0.531207
ENSMUSG00000039007	ENSMUSG00000039007	54381	Cpq	carboxypeptidase Q	-0.185355	5.62206	2.60003	0.113928	0.553291
ENSMUSG00000025991	ENSMUSG00000025991	227231	Cps1	carbamoyl-phosphate synthetase 1	0.521572	9.32949	5.69504	0.021742	0.300785
ENSMUSG00000034022	ENSMUSG00000034022	94230	Cpsf1	cleavage and polyadenylation specific factor 1	0.110553	5.11436	1.08397	0.303432	0.725281
ENSMUSG00000041781	ENSMUSG00000041781	51786	Cpsf2	cleavage and polyadenylation specific factor 2	0.074524	3.93559	0.30634	0.582704	0.869668
ENSMUSG00000054309	ENSMUSG00000054309	54451	Cpsf3	cleavage and polyadenylation specificity factor 3	0.0707292	4.8602	0.271828	0.604692	0.879455
ENSMUSG00000029625	ENSMUSG00000029625	54188	Cpsf4	cleavage and polyadenylation specific factor 4	0.11416	3.31174	0.420736	0.519901	0.845771
ENSMUSG00000018727	ENSMUSG00000018727	52670	Cpsf4l	cleavage and polyadenylation specific factor 4-like	0.2327	3.33405	0.610323	0.439027	0.810319
ENSMUSG00000055531	ENSMUSG00000055531	432508	Cpsf6	cleavage and polyadenylation specific factor 6	0.0273958	4.55835	0.0394328	0.843498	0.957156
ENSMUSG00000034820	ENSMUSG00000034820	269061	Cpsf7	cleavage and polyadenylation specific factor 7	0.276472	3.96188	4.16725	0.0471654	0.400906
ENSMUSG00000024900	ENSMUSG00000024900	12894	Cpt1a	carnitine palmitoyltransferase 1a, liver	0.0760964	8.03167	0.589326	0.446732	0.812384
ENSMUSG00000028607	ENSMUSG00000028607	12896	Cpt2	carnitine palmitoyltransferase 2	0.00898498	6.67599	0.00531978	0.942183	0.984639
ENSMUSG00000029073	ENSMUSG00000029073	79554	Cptp	ceramide-1-phosphate transfer protein	-0.224185	3.28665	1.50156	0.226874	0.669792
ENSMUSG00000016481	ENSMUSG00000016481	12946	Cr1l	complement component (3b/4b) receptor 1-like	-0.0311292	5.36165	0.0926279	0.76228	0.93523
ENSMUSG00000048200	ENSMUSG00000048200	213573	Cracr2b	calcium release activated channel regulator 2B	0.710103	1.35315	4.33088	0.0432089	0.389204
ENSMUSG00000045867	ENSMUSG00000045867	12905	Cradd	CASP2 and RIPK1 domain containing adaptor with death domain	-0.0138279	4.14317	0.00905606	0.924612	0.978466
ENSMUSG00000038002	ENSMUSG00000038002	57354	Cramp1l	cramped chromatin regulator homolog 1	-0.358771	3.68193	2.84852	0.0984516	0.526821
ENSMUSG00000026853	ENSMUSG00000026853	12908	Crat	carnitine acetyltransferase	0.166154	4.83851	0.551451	0.461887	0.820484
ENSMUSG00000044279	ENSMUSG00000044279	224912	Crb3	crumbs family member 3	0.0142124	3.45618	0.00622592	0.937462	0.98276
ENSMUSG00000005362	ENSMUSG00000005362	58799	Crbn	cereblon	0.132289	3.52975	0.303687	0.584335	0.869833
ENSMUSG00000025532	ENSMUSG00000025532	12909	Crcp	calcitonin gene-related peptide-receptor component protein	0.0949497	3.26501	0.252888	0.617528	0.88685
ENSMUSG00000025958	ENSMUSG00000025958	12912	Creb1	cAMP responsive element binding protein 1	-0.125143	4.41989	1.04212	0.312843	0.732644
ENSMUSG00000028466	ENSMUSG00000028466	12913	Creb3	cAMP responsive element binding protein 3	0.126643	4.94636	0.999014	0.32295	0.739261
ENSMUSG00000027230	ENSMUSG00000027230	26427	Creb3l1	cAMP responsive element binding protein 3-like 1	0.00352601	1.78255	9.06492e-05	0.992446	0.997163
ENSMUSG00000038648	ENSMUSG00000038648	208647	Creb3l2	cAMP responsive element binding protein 3-like 2	-0.25751	3.52144	1.74182	0.193654	0.647904
ENSMUSG00000035041	ENSMUSG00000035041	208677	Creb3l3	cAMP responsive element binding protein 3-like 3	0.309322	8.40476	4.79002	0.0339122	0.35997
ENSMUSG00000022521	ENSMUSG00000022521	12914	Crebbp	CREB binding protein	0.23046	6.07623	4.87977	0.0323624	0.354997
ENSMUSG00000032652	ENSMUSG00000032652	232430	Crebl2	cAMP responsive element binding protein-like 2	-0.118233	4.51779	0.256511	0.615184	0.885575
ENSMUSG00000048249	ENSMUSG00000048249	77128	Crebrf	CREB3 regulatory factor	0.0179805	5.52399	0.0188345	0.891461	0.9698
ENSMUSG00000051451	ENSMUSG00000051451	233490	Crebzf	CREB/ATF bZIP transcription factor	0.0173429	3.17423	0.00912702	0.924318	0.978417
ENSMUSG00000040713	ENSMUSG00000040713	433375	Creg1	cellular repressor of E1A-stimulated genes 1	-0.276995	9.33569	7.34968	0.00949332	0.222983
ENSMUSG00000030284	ENSMUSG00000030284	171508	Creld1	cysteine-rich with EGF-like domains 1	-0.184314	4.70209	2.18547	0.146358	0.594066
ENSMUSG00000023272	ENSMUSG00000023272	76737	Creld2	cysteine-rich with EGF-like domains 2	-0.318557	3.74422	0.732479	0.397457	0.786365
ENSMUSG00000063889	ENSMUSG00000063889	12916	Crem	cAMP responsive element modulator	-0.0664315	3.76193	0.0953443	0.75893	0.934473
ENSMUSG00000024074	ENSMUSG00000024074	50766	Crim1	cysteine rich transmembrane BMP regulator 1 (chordin like)	-0.05747	4.48441	0.231952	0.632439	0.892917
ENSMUSG00000006360	ENSMUSG00000006360	12925	Crip1	cysteine-rich protein 1 (intestinal)	0.0883342	2.92884	0.101853	0.751109	0.93313
[truncated: 8,762 more rows]

## Sheet: TXNvs.HFD
	gene.id	entrez	symbol	gene.name	logFC	logCPM	F	PValue	FDR
ENSMUSG00000052595	ENSMUSG00000052595	69865	A1cf	APOBEC1 complementation factor	0.52498	4.83372	4.87008	0.0329519	0.261694
ENSMUSG00000047228	ENSMUSG00000047228	232400	A2ml1	alpha-2-macroglobulin like 1	-0.152768	5.84351	0.820783	0.369828	0.717961
ENSMUSG00000097353	ENSMUSG00000097353	654440	A430046D13Rik	Riken cDNA A430046D13 gene	-0.132502	0.974922	0.120939	0.729657	0.91201
ENSMUSG00000093483	ENSMUSG00000093483	613254	AA465934	expressed sequence AA465934	-0.429108	2.16988	1.96822	0.167571	0.536039
ENSMUSG00000036678	ENSMUSG00000036678	223921	Aaas	achalasia, adrenocortical insufficiency, alacrimia	-0.268686	3.17654	1.96632	0.167773	0.536045
ENSMUSG00000029482	ENSMUSG00000029482	78894	Aacs	acetoacetyl-CoA synthetase	-0.861367	4.81876	5.23855	0.027927	0.241521
ENSMUSG00000027761	ENSMUSG00000027761	67758	Aadac	arylacetamide deacetylase	-0.0545526	8.68724	0.0503102	0.823681	0.943686
ENSMUSG00000057228	ENSMUSG00000057228	23923	Aadat	aminoadipate aminotransferase	0.517266	5.80959	4.98454	0.031203	0.256884
ENSMUSG00000037257	ENSMUSG00000037257	66939	Aagab	alpha- and gamma-adaptin binding protein	0.157586	4.55866	1.28816	0.26246	0.6243
ENSMUSG00000057230	ENSMUSG00000057230	269774	Aak1	AP2 associated kinase 1	0.0868816	4.38564	0.362285	0.550293	0.826706
ENSMUSG00000035642	ENSMUSG00000035642	66273	Aamdc	adipogenesis associated Mth938 domain containing	0.0318509	4.80892	0.0449324	0.833096	0.947291
ENSMUSG00000006299	ENSMUSG00000006299	227290	Aamp	angio-associated migratory protein	-0.141522	7.37772	0.710404	0.40382	0.742828
ENSMUSG00000027628	ENSMUSG00000027628	68295	Aar2	AAR2 splicing factor homolog	0.179918	3.05929	0.773007	0.384008	0.729662
ENSMUSG00000031960	ENSMUSG00000031960	234734	Aars	alanyl-tRNA synthetase	0.0769044	6.57487	0.436452	0.512244	0.805206
ENSMUSG00000023938	ENSMUSG00000023938	224805	Aars2	alanyl-tRNA synthetase 2, mitochondrial	0.00716522	2.70969	0.00114997	0.973099	0.992844
ENSMUSG00000055923	ENSMUSG00000055923	231326	Aasdh	aminoadipate-semialdehyde dehydrogenase	0.293619	2.66415	3.24898	0.0782387	0.388881
ENSMUSG00000025894	ENSMUSG00000025894	67618	Aasdhppt	aminoadipate-semialdehyde dehydrogenase-phosphopantetheinyl transferase	0.0706588	4.16376	0.121819	0.728715	0.911861
ENSMUSG00000029695	ENSMUSG00000029695	30956	Aass	aminoadipate-semialdehyde synthase	0.29336	7.38248	2.47894	0.122757	0.473076
ENSMUSG00000018697	ENSMUSG00000018697	56321	Aatf	apoptosis antagonizing transcription factor	-0.389955	4.25454	5.61516	0.0222023	0.217002
ENSMUSG00000025375	ENSMUSG00000025375	11302	Aatk	apoptosis-associated tyrosine kinase	0.369421	4.40121	1.58342	0.215707	0.584691
ENSMUSG00000057880	ENSMUSG00000057880	268860	Abat	4-aminobutyrate aminotransferase	0.477722	7.0771	18.0123	0.00010971	0.0124273
ENSMUSG00000015243	ENSMUSG00000015243	11303	Abca1	ATP-binding cassette, sub-family A (ABC1), member 1	-0.0169484	6.47284	0.0110148	0.916886	0.976418
ENSMUSG00000026944	ENSMUSG00000026944	11305	Abca2	ATP-binding cassette, sub-family A (ABC1), member 2	0.221261	4.02044	1.35584	0.25046	0.615775
ENSMUSG00000024130	ENSMUSG00000024130	27410	Abca3	ATP-binding cassette, sub-family A (ABC1), member 3	-0.138518	4.68189	1.03126	0.31535	0.672345
ENSMUSG00000018800	ENSMUSG00000018800	217265	Abca5	ATP-binding cassette, sub-family A (ABC1), member 5	0.141333	1.92443	0.225651	0.637089	0.870424
ENSMUSG00000044749	ENSMUSG00000044749	76184	Abca6	ATP-binding cassette, sub-family A (ABC1), member 6	0.249213	5.62601	6.30489	0.0157414	0.18684
ENSMUSG00000035722	ENSMUSG00000035722	27403	Abca7	ATP-binding cassette, sub-family A (ABC1), member 7	-0.064484	1.81053	0.0440945	0.834636	0.947291
ENSMUSG00000041828	ENSMUSG00000041828	217258	Abca8a	ATP-binding cassette, sub-family A (ABC1), member 8a	0.856523	5.80957	12.6102	0.00100439	0.0450695
ENSMUSG00000020620	ENSMUSG00000020620	27404	Abca8b	ATP-binding cassette, sub-family A (ABC1), member 8b	0.0957687	4.69587	0.277487	0.600967	0.855036
ENSMUSG00000041797	ENSMUSG00000041797	217262	Abca9	ATP-binding cassette, sub-family A (ABC1), member 9	0.0498257	1.07715	0.0119583	0.913413	0.975316
ENSMUSG00000031974	ENSMUSG00000031974	56199	Abcb10	ATP-binding cassette, sub-family B (MDR/TAP), member 10	0.125988	4.19414	0.670793	0.417137	0.751225
ENSMUSG00000027048	ENSMUSG00000027048	27413	Abcb11	ATP-binding cassette, sub-family B (MDR/TAP), member 11	0.538586	7.64905	22.4022	2.26674e-05	0.00540606
ENSMUSG00000040584	ENSMUSG00000040584	18671	Abcb1a	ATP-binding cassette, sub-family B (MDR/TAP), member 1A	-1.44278	2.96658	38.1794	1.76073e-07	0.000270675
ENSMUSG00000028970	ENSMUSG00000028970	18669	Abcb1b	ATP-binding cassette, sub-family B (MDR/TAP), member 1B	-0.804049	1.82668	9.18263	0.00405966	0.0931471
ENSMUSG00000042476	ENSMUSG00000042476	18670	Abcb4	ATP-binding cassette, sub-family B (MDR/TAP), member 4	0.0891355	8.88104	0.339456	0.563082	0.833311
ENSMUSG00000031333	ENSMUSG00000031333	11306	Abcb7	ATP-binding cassette, sub-family B (MDR/TAP), member 7	0.0970637	4.01587	0.317285	0.57607	0.842722
ENSMUSG00000028973	ENSMUSG00000028973	74610	Abcb8	ATP-binding cassette, sub-family B (MDR/TAP), member 8	-0.410868	3.51395	5.66047	0.0217005	0.215027
ENSMUSG00000029408	ENSMUSG00000029408	56325	Abcb9	ATP-binding cassette, sub-family B (MDR/TAP), member 9	-0.272545	1.21556	0.494385	0.485638	0.79351
ENSMUSG00000023088	ENSMUSG00000023088	17250	Abcc1	ATP-binding cassette, sub-family C (CFTR/MRP), member 1	-0.569369	0.610232	1.17381	0.284452	0.648103
ENSMUSG00000032842	ENSMUSG00000032842	224814	Abcc10	ATP-binding cassette, sub-family C (CFTR/MRP), member 10	-0.0553121	2.11404	0.0629998	0.802971	0.936018
ENSMUSG00000025194	ENSMUSG00000025194	12780	Abcc2	ATP-binding cassette, sub-family C (CFTR/MRP), member 2	-0.0684655	8.43603	0.460472	0.500915	0.801161
ENSMUSG00000020865	ENSMUSG00000020865	76408	Abcc3	ATP-binding cassette, sub-family C (CFTR/MRP), member 3	-0.225729	5.96955	2.04947	0.159241	0.523407
ENSMUSG00000032849	ENSMUSG00000032849	239273	Abcc4	ATP-binding cassette, sub-family C (CFTR/MRP), member 4	-1.51161	1.26409	11.7891	0.00129879	0.0521503
ENSMUSG00000022822	ENSMUSG00000022822	27416	Abcc5	ATP-binding cassette, sub-family C (CFTR/MRP), member 5	-0.636679	2.15857	4.57354	0.0379918	0.279638
ENSMUSG00000030834	ENSMUSG00000030834	27421	Abcc6	ATP-binding cassette, sub-family C (CFTR/MRP), member 6	0.249372	5.19832	3.89311	0.0547115	0.329831
ENSMUSG00000030249	ENSMUSG00000030249	20928	Abcc9	ATP-binding cassette, sub-family C (CFTR/MRP), member 9	-0.106982	4.32431	0.487538	0.488658	0.795409
ENSMUSG00000031378	ENSMUSG00000031378	11666	Abcd1	ATP-binding cassette, sub-family D (ALD), member 1	-0.363267	5.23557	2.50698	0.121006	0.470171
ENSMUSG00000055782	ENSMUSG00000055782	26874	Abcd2	ATP-binding cassette, sub-family D (ALD), member 2	-0.575938	4.65573	11.5852	0.00141627	0.0552191
ENSMUSG00000028127	ENSMUSG00000028127	19299	Abcd3	ATP-binding cassette, sub-family D (ALD), member 3	-0.134763	8.89385	1.52436	0.223436	0.590906
ENSMUSG00000021240	ENSMUSG00000021240	19300	Abcd4	ATP-binding cassette, sub-family D (ALD), member 4	-0.0272314	2.10894	0.0113167	0.915759	0.976174
ENSMUSG00000058355	ENSMUSG00000058355	24015	Abce1	ATP-binding cassette, sub-family E (OABP), member 1	-0.186997	4.51849	1.18563	0.282072	0.645595
ENSMUSG00000038762	ENSMUSG00000038762	224742	Abcf1	ATP-binding cassette, sub-family F (GCN20), member 1	0.157624	5.91533	0.676762	0.415266	0.749025
ENSMUSG00000028953	ENSMUSG00000028953	27407	Abcf2	ATP-binding cassette, sub-family F (GCN20), member 2	0.0157909	4.14479	0.0118855	0.913676	0.975403
ENSMUSG00000003234	ENSMUSG00000003234	27406	Abcf3	ATP-binding cassette, sub-family F (GCN20), member 3	-0.0323974	3.78261	0.0282675	0.867243	0.959532
ENSMUSG00000024030	ENSMUSG00000024030	11307	Abcg1	ATP binding cassette subfamily G member 1	-0.568443	2.66743	3.82648	0.0567393	0.335663
ENSMUSG00000029802	ENSMUSG00000029802	26357	Abcg2	ATP binding cassette subfamily G member 2 (Junior blood group)	-0.110239	6.29149	0.861776	0.358247	0.706579
ENSMUSG00000029299	ENSMUSG00000029299	27405	Abcg3	ATP binding cassette subfamily G member 3	-0.43259	1.07128	1.0139	0.319411	0.676148
ENSMUSG00000040505	ENSMUSG00000040505	27409	Abcg5	ATP binding cassette subfamily G member 5	0.0646387	5.40455	0.14728	0.702975	0.903142
ENSMUSG00000024254	ENSMUSG00000024254	67470	Abcg8	ATP binding cassette subfamily G member 8	0.349859	5.6829	4.3338	0.0431416	0.295189
ENSMUSG00000006638	ENSMUSG00000006638	57742	Abhd1	abhydrolase domain containing 1	0.225739	2.1178	0.748687	0.39153	0.733633
ENSMUSG00000033157	ENSMUSG00000033157	213012	Abhd10	abhydrolase domain containing 10	0.253017	2.47971	1.02751	0.316222	0.673434
ENSMUSG00000040532	ENSMUSG00000040532	68758	Abhd11	abhydrolase domain containing 11	-0.0847387	4.13192	0.397002	0.531862	0.816342
ENSMUSG00000032046	ENSMUSG00000032046	76192	Abhd12	abhydrolase domain containing 12	0.109593	4.41	0.482083	0.491087	0.797131
ENSMUSG00000040396	ENSMUSG00000040396	68904	Abhd13	abhydrolase domain containing 13	0.125197	3.5875	0.602727	0.441644	0.769516
ENSMUSG00000042210	ENSMUSG00000042210	68644	Abhd14a	abhydrolase domain containing 14A	0.315011	3.26496	2.54312	0.11785	0.465574
ENSMUSG00000042073	ENSMUSG00000042073	76491	Abhd14b	abhydrolase domain containing 14b	-0.0884394	7.41273	0.525125	0.472455	0.787828
ENSMUSG00000000686	ENSMUSG00000000686	67477	Abhd15	abhydrolase domain containing 15	0.160177	2.84179	0.639098	0.428282	0.759735
ENSMUSG00000007036	ENSMUSG00000007036	193742	Abhd16a	abhydrolase domain containing 16A	-0.503276	5.2236	11.0404	0.0017886	0.0612967
ENSMUSG00000003346	ENSMUSG00000003346	216169	Abhd17a	abhydrolase domain containing 17A	-0.21887	5.45947	2.91068	0.0949614	0.426494
ENSMUSG00000047368	ENSMUSG00000047368	226016	Abhd17b	abhydrolase domain containing 17B	0.417412	4.74313	12.4505	0.000983378	0.0448395
ENSMUSG00000038459	ENSMUSG00000038459	70178	Abhd17c	abhydrolase domain containing 17C	0.205418	6.97849	4.23383	0.0455098	0.303896
ENSMUSG00000037818	ENSMUSG00000037818	269423	Abhd18	abhydrolase domain containing 18	0.326883	4.16452	5.27081	0.0264496	0.235421
ENSMUSG00000039202	ENSMUSG00000039202	54608	Abhd2	abhydrolase domain containing 2	-0.727709	6.69974	6.94348	0.0121187	0.167406
ENSMUSG00000002475	ENSMUSG00000002475	106861	Abhd3	abhydrolase domain containing 3	-0.275719	4.83772	0.836969	0.366002	0.713537
ENSMUSG00000040997	ENSMUSG00000040997	105501	Abhd4	abhydrolase domain containing 4	-0.550467	5.19005	11.6255	0.00139219	0.0544777
ENSMUSG00000032540	ENSMUSG00000032540	67469	Abhd5	abhydrolase domain containing 5	-0.155146	4.5314	1.31538	0.257549	0.620672
ENSMUSG00000025277	ENSMUSG00000025277	66082	Abhd6	abhydrolase domain containing 6	-0.353919	5.70775	2.79323	0.102156	0.439833
ENSMUSG00000007950	ENSMUSG00000007950	64296	Abhd8	abhydrolase domain containing 8	-0.51606	1.07332	2.15587	0.149055	0.510985
ENSMUSG00000058835	ENSMUSG00000058835	11308	Abi1	abl-interactor 1	-0.176824	4.27403	0.825461	0.36848	0.716388
ENSMUSG00000026782	ENSMUSG00000026782	329165	Abi2	abl-interactor 2	-0.342241	2.27819	1.04492	0.312202	0.67001
ENSMUSG00000018381	ENSMUSG00000018381	66610	Abi3	ABI gene family, member 3	-0.101288	3.11133	0.204091	0.653632	0.878997
ENSMUSG00000035258	ENSMUSG00000035258	320712	Abi3bp	ABI gene family, member 3 (NESH) binding protein	-0.16702	2.53156	0.563095	0.456963	0.778662
ENSMUSG00000038827	ENSMUSG00000038827	230234	Abitram	actin binding transcription modulator	-0.0333454	1.23534	0.00688834	0.934227	0.981759
ENSMUSG00000026842	ENSMUSG00000026842	11350	Abl1	c-abl oncogene 1, non-receptor tyrosine kinase	-0.0861825	3.78245	0.180873	0.672672	0.888757
ENSMUSG00000026596	ENSMUSG00000026596	11352	Abl2	v-abl Abelson murine leukemia viral oncogene 2 (arg, Abelson-related gene)	0.265039	2.97599	1.83319	0.182583	0.553991
ENSMUSG00000025085	ENSMUSG00000025085	226251	Ablim1	actin-binding LIM protein 1	-0.156774	4.08261	0.457998	0.502136	0.801655
ENSMUSG00000029095	ENSMUSG00000029095	231148	Ablim2	actin-binding LIM protein 2	0.0597073	1.3891	0.0386376	0.845063	0.950431
ENSMUSG00000032735	ENSMUSG00000032735	319713	Ablim3	actin binding LIM protein family, member 3	0.186795	3.88675	0.487579	0.48886	0.795497
ENSMUSG00000017631	ENSMUSG00000017631	109934	Abr	active BCR-related gene	-0.771832	1.86556	4.52032	0.0390743	0.282935
ENSMUSG00000042895	ENSMUSG00000042895	223513	Abra	actin-binding Rho activating protein	0.731856	2.82814	0.870018	0.357192	0.705662
ENSMUSG00000078453	ENSMUSG00000078453	73112	Abracl	ABRA C-terminal like	-0.162092	3.0641	0.515515	0.476511	0.789369
ENSMUSG00000035234	ENSMUSG00000035234	70681	Abraxas1	BRCA1 A complex subunit	0.0456155	2.52598	0.0223031	0.881958	0.96539
ENSMUSG00000030965	ENSMUSG00000030965	109359	Abraxas2	BRISC complex subunit	0.169024	5.04686	1.65209	0.205319	0.57714
ENSMUSG00000036376	ENSMUSG00000036376	30946	Abt1	activator of basal transcription 1	-0.127762	2.89938	0.128292	0.722016	0.909537
ENSMUSG00000030083	ENSMUSG00000030083	80283	Abtb1	ankyrin repeat and BTB (POZ) domain containing 1	-0.0397418	3.86109	0.0547466	0.816073	0.940534
ENSMUSG00000032724	ENSMUSG00000032724	99382	Abtb2	ankyrin repeat and BTB (POZ) domain containing 2	0.285203	2.9184	0.778957	0.382368	0.728757
ENSMUSG00000036138	ENSMUSG00000036138	113868	Acaa1a	acetyl-Coenzyme A acyltransferase 1A	-0.236955	7.35271	2.08835	0.155427	0.518139
ENSMUSG00000010651	ENSMUSG00000010651	235674	Acaa1b	acetyl-Coenzyme A acyltransferase 1B	-0.490443	10.7396	7.5666	0.00856495	0.138598
ENSMUSG00000036880	ENSMUSG00000036880	52538	Acaa2	acetyl-Coenzyme A acyltransferase 2 (mitochondrial 3-oxoacyl-Coenzyme A thiolase)	0.238066	9.90409	4.31247	0.0436353	0.296814
ENSMUSG00000020532	ENSMUSG00000020532	107476	Acaca	acetyl-Coenzyme A carboxylase alpha	-0.346165	5.70316	2.99881	0.0905791	0.418695
ENSMUSG00000042010	ENSMUSG00000042010	100705	Acacb	acetyl-Coenzyme A carboxylase beta	-1.06175	5.37678	10.5243	0.00248616	0.0729246
ENSMUSG00000029456	ENSMUSG00000029456	71985	Acad10	acyl-Coenzyme A dehydrogenase family, member 10	0.0537767	3.98802	0.102755	0.750048	0.917606
ENSMUSG00000090150	ENSMUSG00000090150	102632	Acad11	acyl-Coenzyme A dehydrogenase family, member 11	0.0903068	7.05855	0.275827	0.602089	0.855731
ENSMUSG00000042647	ENSMUSG00000042647	338350	Acad12	acyl-Coenzyme A dehydrogenase family, member 12	-0.307544	3.17467	2.41629	0.127159	0.479269
ENSMUSG00000031969	ENSMUSG00000031969	66948	Acad8	acyl-Coenzyme A dehydrogenase family, member 8	0.156804	5.19717	2.35506	0.131952	0.484951
ENSMUSG00000027710	ENSMUSG00000027710	229211	Acad9	acyl-Coenzyme A dehydrogenase family, member 9	-0.351297	0.929988	0.834775	0.365816	0.713537
ENSMUSG00000026003	ENSMUSG00000026003	11363	Acadl	acyl-Coenzyme A dehydrogenase, long-chain	-0.12096	7.50849	2.05371	0.15882	0.522808
ENSMUSG00000062908	ENSMUSG00000062908	11364	Acadm	acyl-Coenzyme A dehydrogenase, medium chain	-0.170214	8.27168	1.06906	0.30674	0.666566
ENSMUSG00000029545	ENSMUSG00000029545	11409	Acads	acyl-Coenzyme A dehydrogenase, short chain	0.0986246	7.39778	0.365008	0.548804	0.826084
ENSMUSG00000030861	ENSMUSG00000030861	66885	Acadsb	acyl-Coenzyme A dehydrogenase, short/branched chain	0.464241	6.60266	11.2009	0.00166923	0.0592824
ENSMUSG00000018574	ENSMUSG00000018574	11370	Acadvl	acyl-Coenzyme A dehydrogenase, very long chain	-0.0723653	8.06214	0.415392	0.522552	0.810311
ENSMUSG00000049076	ENSMUSG00000049076	78618	Acap2	ArfGAP with coiled-coil, ankyrin repeat and PH domains 2	-0.430291	3.5905	2.955	0.0926236	0.422519
ENSMUSG00000029033	ENSMUSG00000029033	140500	Acap3	ArfGAP with coiled-coil, ankyrin repeat and PH domains 3	-0.421865	1.59256	1.18531	0.282136	0.645595
ENSMUSG00000032047	ENSMUSG00000032047	110446	Acat1	acetyl-Coenzyme A acetyltransferase 1	-0.204083	8.89374	0.795593	0.377712	0.725037
ENSMUSG00000023832	ENSMUSG00000023832	110460	Acat2	acetyl-Coenzyme A acetyltransferase 2	-0.222489	6.77803	1.65909	0.204465	0.576434
ENSMUSG00000062480	ENSMUSG00000062480	224530	Acat3	acetyl-Coenzyme A acetyltransferase 3	0.192052	7.56655	2.49519	0.121273	0.470211
ENSMUSG00000026499	ENSMUSG00000026499	170760	Acbd3	acyl-Coenzyme A binding domain containing 3	0.032774	5.10949	0.0786267	0.780466	0.930307
ENSMUSG00000056938	ENSMUSG00000056938	67131	Acbd4	acyl-Coenzyme A binding domain containing 4	-0.0784264	5.24512	0.290554	0.592551	0.850761
ENSMUSG00000026781	ENSMUSG00000026781	74159	Acbd5	acyl-Coenzyme A binding domain containing 5	0.298113	7.22541	6.8183	0.0122513	0.168294
ENSMUSG00000033701	ENSMUSG00000033701	72482	Acbd6	acyl-Coenzyme A binding domain containing 6	-0.0513964	5.04696	0.190927	0.664258	0.884554
ENSMUSG00000040272	ENSMUSG00000040272	329470	Accs	1-aminocyclopropane-1-carboxylate synthase (non-functional)	-0.580324	1.94219	3.77301	0.0584267	0.340768
ENSMUSG00000038000	ENSMUSG00000038000	497652	Acd	adrenocortical dysplasia	0.0823991	3.88376	0.235119	0.630131	0.867337
ENSMUSG00000038007	ENSMUSG00000038007	230379	Acer2	alkaline ceramidase 2	-0.014818	3.30318	0.00617155	0.937735	0.983004
ENSMUSG00000030760	ENSMUSG00000030760	66190	Acer3	alkaline ceramidase 3	-0.258612	3.23232	1.60946	0.21116	0.580296
ENSMUSG00000022185	ENSMUSG00000022185	56215	Acin1	apoptotic chromatin condensation inducer 1	0.0378472	6.22751	0.120855	0.729747	0.91201
ENSMUSG00000037872	ENSMUSG00000037872	13349	Ackr1	atypical chemokine receptor 1 (Duffy blood group)	-0.568838	1.00078	1.38151	0.24609	0.612232
ENSMUSG00000044534	ENSMUSG00000044534	59289	Ackr2	atypical chemokine receptor 2	-0.378741	1.12199	0.796514	0.376935	0.724749
ENSMUSG00000020917	ENSMUSG00000020917	104112	Acly	ATP citrate lyase	-0.412022	6.19687	1.69242	0.201317	0.573181
ENSMUSG00000026348	ENSMUSG00000026348	266645	Acmsd	amino carboxymuconate semialdehyde decarboxylase	1.12649	3.56621	9.18648	0.00432963	0.0970649
ENSMUSG00000070985	ENSMUSG00000070985	230161	Acnat1	acyl-coenzyme A amino acid N-acyltransferase 1	0.298467	2.22595	1.24594	0.270316	0.635641
ENSMUSG00000060317	ENSMUSG00000060317	209186	Acnat2	acyl-coenzyme A amino acid N-acyltransferase 2	-0.671369	4.50414	6.25773	0.016531	0.190472
ENSMUSG00000028405	ENSMUSG00000028405	11428	Aco1	aconitase 1	0.0446176	6.23553	0.0670454	0.796891	0.934643
ENSMUSG00000022477	ENSMUSG00000022477	11429	Aco2	aconitase 2, mitochondrial	-0.300638	7.20853	6.06695	0.0177071	0.196237
ENSMUSG00000072949	ENSMUSG00000072949	26897	Acot1	acyl-CoA thioesterase 1	0.0516547	5.2915	0.0707651	0.79148	0.933433
ENSMUSG00000034853	ENSMUSG00000034853	329910	Acot11	acyl-CoA thioesterase 11	-0.497126	2.11507	2.55284	0.117169	0.46513
ENSMUSG00000021620	ENSMUSG00000021620	74156	Acot12	acyl-CoA thioesterase 12	0.0882403	6.10592	0.589884	0.446518	0.771959
ENSMUSG00000006717	ENSMUSG00000006717	66834	Acot13	acyl-CoA thioesterase 13	-0.376436	7.00223	8.62282	0.00523783	0.108023
ENSMUSG00000021226	ENSMUSG00000021226	171210	Acot2	acyl-CoA thioesterase 2	-1.33478	4.97384	25.9878	8.60357e-06	0.00318553
ENSMUSG00000021228	ENSMUSG00000021228	171281	Acot3	acyl-CoA thioesterase 3	-1.19794	5.06714	5.15315	0.0293185	0.247529
ENSMUSG00000052392	ENSMUSG00000052392	171282	Acot4	acyl-CoA thioesterase 4	-0.760206	6.21235	9.65978	0.00349065	0.0857599
ENSMUSG00000043487	ENSMUSG00000043487	217700	Acot6	acyl-CoA thioesterase 6	-0.127774	2.16237	0.105558	0.7468	0.917508
ENSMUSG00000028937	ENSMUSG00000028937	70025	Acot7	acyl-CoA thioesterase 7	-0.00139839	4.70393	0.000112431	0.991587	0.998049
ENSMUSG00000017307	ENSMUSG00000017307	170789	Acot8	acyl-CoA thioesterase 8	0.0506406	4.7706	0.0977449	0.756012	0.920355
ENSMUSG00000025287	ENSMUSG00000025287	56360	Acot9	acyl-CoA thioesterase 9	-0.624845	1.84854	2.67236	0.109155	0.453162
ENSMUSG00000020777	ENSMUSG00000020777	11430	Acox1	acyl-Coenzyme A oxidase 1, palmitoyl	-0.126597	10.0914	1.09788	0.300385	0.661705
ENSMUSG00000021751	ENSMUSG00000021751	93732	Acox2	acyl-Coenzyme A oxidase 2, branched chain	0.184081	6.92224	3.00237	0.0900644	0.417523
ENSMUSG00000029098	ENSMUSG00000029098	80911	Acox3	acyl-Coenzyme A oxidase 3, pristanoyl	-0.088157	3.89069	0.315011	0.577435	0.843838
ENSMUSG00000044573	ENSMUSG00000044573	11431	Acp1	acid phosphatase 1, soluble	-0.036168	6.23516	0.117416	0.733467	0.912894
ENSMUSG00000002103	ENSMUSG00000002103	11432	Acp2	acid phosphatase 2, lysosomal	0.191929	5.01573	1.76893	0.190287	0.560046
ENSMUSG00000001348	ENSMUSG00000001348	11433	Acp5	acid phosphatase 5, tartrate resistant	0.0425666	6.85012	0.1456	0.704591	0.904031
ENSMUSG00000028093	ENSMUSG00000028093	66659	Acp6	acid phosphatase 6, lysophosphatidic	-0.00201404	4.69451	0.000192947	0.988979	0.997562
ENSMUSG00000032561	ENSMUSG00000032561	56318	Acpp	acid phosphatase, prostate	0.924973	1.5061	3.31786	0.0752835	0.38047
ENSMUSG00000072770	ENSMUSG00000072770	54137	Acrbp	proacrosin binding protein	0.499975	2.67492	3.84093	0.0562929	0.33394
ENSMUSG00000076435	ENSMUSG00000076435	264895	Acsf2	acyl-CoA synthetase family member 2	0.343012	4.23606	1.83872	0.182412	0.553991
ENSMUSG00000015016	ENSMUSG00000015016	257633	Acsf3	acyl-CoA synthetase family member 3	0.0385253	4.0536	0.0466183	0.830042	0.947098
ENSMUSG00000018796	ENSMUSG00000018796	14081	Acsl1	acyl-CoA synthetase long-chain family member 1	0.375793	9.8209	5.82971	0.0199313	0.206032
ENSMUSG00000032883	ENSMUSG00000032883	74205	Acsl3	acyl-CoA synthetase long-chain family member 3	-0.445824	4.76851	4.51848	0.0392693	0.283609
ENSMUSG00000031278	ENSMUSG00000031278	50790	Acsl4	acyl-CoA synthetase long-chain family member 4	-0.527646	5.4282	6.19814	0.0168242	0.192069
ENSMUSG00000024981	ENSMUSG00000024981	433256	Acsl5	acyl-CoA synthetase long-chain family member 5	-0.183005	7.73531	1.81876	0.184281	0.554975
ENSMUSG00000033533	ENSMUSG00000033533	117147	Acsm1	acyl-CoA synthetase medium-chain family member 1	0.3715	7.70668	6.87298	0.0119316	0.165985
ENSMUSG00000030935	ENSMUSG00000030935	20216	Acsm3	acyl-CoA synthetase medium-chain family member 3	0.213672	5.28255	1.72394	0.195914	0.566649
ENSMUSG00000030972	ENSMUSG00000030972	272428	Acsm5	acyl-CoA synthetase medium-chain family member 5	0.0334331	5.33856	0.0508369	0.822645	0.943686
ENSMUSG00000027605	ENSMUSG00000027605	60525	Acss2	acyl-CoA synthetase short-chain family member 2	-0.130547	6.38823	0.176167	0.677107	0.890393
ENSMUSG00000035948	ENSMUSG00000035948	380660	Acss3	acyl-CoA synthetase short-chain family member 3	-0.167361	4.06564	0.451225	0.505404	0.802703
ENSMUSG00000035783	ENSMUSG00000035783	11475	Acta2	actin, alpha 2, smooth muscle, aorta	0.020922	2.56115	0.00417512	0.94877	0.985604
ENSMUSG00000029580	ENSMUSG00000029580	11461	Actb	actin, beta	-0.0475041	11.0462	0.101199	0.751882	0.91818
ENSMUSG00000062825	ENSMUSG00000062825	11465	Actg1	actin, gamma, cytoplasmic 1	-0.42072	7.61363	3.69381	0.0616804	0.347327
ENSMUSG00000027671	ENSMUSG00000027671	56456	Actl6a	actin-like 6A	0.305438	3.96614	4.65808	0.0363384	0.275573
ENSMUSG00000015143	ENSMUSG00000015143	109711	Actn1	actinin, alpha 1	0.0188271	5.57021	0.0209182	0.885655	0.966258
ENSMUSG00000054808	ENSMUSG00000054808	60595	Actn4	actinin alpha 4	0.0546457	7.41613	0.140236	0.709824	0.905884
ENSMUSG00000021076	ENSMUSG00000021076	56444	Actr10	ARP10 actin-related protein 10	0.0179451	5.40109	0.0339091	0.854736	0.954829
ENSMUSG00000025228	ENSMUSG00000025228	54130	Actr1a	ARP1 actin-related protein 1A, centractin alpha	0.223638	4.65597	1.43019	0.238062	0.604481
ENSMUSG00000037351	ENSMUSG00000037351	226977	Actr1b	ARP1 actin-related protein 1B, centractin beta	-0.310843	5.46381	10.3442	0.00242101	0.0725697
ENSMUSG00000020152	ENSMUSG00000020152	66713	Actr2	ARP2 actin-related protein 2	0.0246972	5.59172	0.0201788	0.88768	0.966258
ENSMUSG00000026341	ENSMUSG00000026341	74117	Actr3	ARP3 actin-related protein 3	-0.162232	5.52717	1.05653	0.309559	0.667889
ENSMUSG00000037761	ENSMUSG00000037761	109275	Actr5	ARP5 actin-related protein 5	0.145038	2.64197	0.528162	0.471184	0.786964
ENSMUSG00000019948	ENSMUSG00000019948	67019	Actr6	ARP6 actin-related protein 6	0.328528	3.67165	3.5834	0.0648702	0.354169
ENSMUSG00000015971	ENSMUSG00000015971	56249	Actr8	ARP8 actin-related protein 8	0.142514	4.31188	1.35552	0.250516	0.615775
ENSMUSG00000026836	ENSMUSG00000026836	11477	Acvr1	activin A receptor, type 1	-0.0166508	3.65394	0.00286293	0.957592	0.98758
ENSMUSG00000000532	ENSMUSG00000000532	11479	Acvr1b	activin A receptor, type 1B	-0.539146	2.84413	4.37758	0.0421472	0.293259
ENSMUSG00000052155	ENSMUSG00000052155	11480	Acvr2a	activin receptor IIA	0.366726	2.87971	3.75838	0.0588979	0.340777
ENSMUSG00000061393	ENSMUSG00000061393	11481	Acvr2b	activin receptor IIB	0.645569	2.85487	7.76405	0.00780367	0.134146
ENSMUSG00000000530	ENSMUSG00000000530	11482	Acvrl1	activin A receptor, type II-like 1	-0.638637	1.53181	2.10801	0.15354	0.516165
ENSMUSG00000023262	ENSMUSG00000023262	109652	Acy1	aminoacylase 1	0.373698	4.40905	4.86884	0.0325469	0.261694
ENSMUSG00000024866	ENSMUSG00000024866	71670	Acy3	aspartoacylase (aminoacylase) 3	-0.145974	6.44632	1.01505	0.31914	0.676037
ENSMUSG00000008822	ENSMUSG00000008822	66204	Acyp1	acylphosphatase 1, erythrocyte (common) type	0.277427	3.38878	0.597603	0.444065	0.771246
ENSMUSG00000027259	ENSMUSG00000027259	75894	Adal	adenosine deaminase-like	0.0497367	2.90581	0.0356473	0.851104	0.95282
ENSMUSG00000054693	ENSMUSG00000054693	11487	Adam10	a disintegrin and metallopeptidase domain 10	-0.301151	4.04613	2.63194	0.111794	0.456149
ENSMUSG00000020926	ENSMUSG00000020926	11488	Adam11	a disintegrin and metallopeptidase domain 11	0.0714639	1.43769	0.0230074	0.880123	0.964539
ENSMUSG00000028041	ENSMUSG00000028041	11490	Adam15	a disintegrin and metallopeptidase domain 15 (metargidin)	-0.76039	1.56641	2.97148	0.0916821	0.42162
ENSMUSG00000052593	ENSMUSG00000052593	11491	Adam17	a disintegrin and metallopeptidase domain 17	0.11187	3.49608	0.423651	0.518465	0.808229
ENSMUSG00000011256	ENSMUSG00000011256	11492	Adam19	a disintegrin and metallopeptidase domain 19 (meltrin beta)	-0.288077	1.33215	0.481745	0.491238	0.797196
ENSMUSG00000025964	ENSMUSG00000025964	23792	Adam23	a disintegrin and metallopeptidase domain 23	-0.0236965	3.31056	0.0172112	0.896215	0.968921
ENSMUSG00000031555	ENSMUSG00000031555	11502	Adam9	a disintegrin and metallopeptidase domain 9 (meltrin gamma)	-0.39977	3.36327	0.385395	0.538646	0.819562
ENSMUSG00000022893	ENSMUSG00000022893	11504	Adamts1	a disintegrin-like and metallopeptidase (reprolysin type) with thrombospondin type 1 motif, 1	-0.412348	3.37623	3.08295	0.0859936	0.408521
ENSMUSG00000024299	ENSMUSG00000024299	224697	Adamts10	a disintegrin-like and metallopeptidase (reprolysin type) with thrombospondin type 1 motif, 10	-0.313951	2.53248	1.39804	0.243327	0.609791
ENSMUSG00000014852	ENSMUSG00000014852	279028	Adamts13	a disintegrin-like and metallopeptidase (reprolysin type) with thrombospondin type 1 motif, 13	-0.143578	2.28006	0.252742	0.617629	0.86284
ENSMUSG00000036545	ENSMUSG00000036545	216725	Adamts2	a disintegrin-like and metallopeptidase (reprolysin type) with thrombospondin type 1 motif, 2	-0.613147	2.44331	2.50934	0.120498	0.469248
ENSMUSG00000022894	ENSMUSG00000022894	23794	Adamts5	a disintegrin-like and metallopeptidase (reprolysin type) with thrombospondin type 1 motif, 5 (aggrecanase-2)	0.371309	1.79097	0.730833	0.39719	0.738448
ENSMUSG00000032363	ENSMUSG00000032363	108153	Adamts7	a disintegrin-like and metallopeptidase (reprolysin type) with thrombospondin type 1 motif, 7	-0.453081	1.74976	1.47947	0.230266	0.597269
ENSMUSG00000030022	ENSMUSG00000030022	101401	Adamts9	a disintegrin-like and metallopeptidase (reprolysin type) with thrombospondin type 1 motif, 9	-0.641823	1.12667	2.14385	0.150167	0.51247
ENSMUSG00000066113	ENSMUSG00000066113	77739	Adamtsl1	ADAMTS-like 1	-0.885189	1.3862	2.53095	0.118941	0.467468
ENSMUSG00000036040	ENSMUSG00000036040	77794	Adamtsl2	ADAMTS-like 2	-0.144933	2.80774	0.100178	0.753307	0.918775
ENSMUSG00000015850	ENSMUSG00000015850	229595	Adamtsl4	ADAMTS-like 4	0.043632	1.09719	0.0118531	0.913793	0.975432
ENSMUSG00000020709	ENSMUSG00000020709	216991	Adap2	ArfGAP with dual PH domains 2	0.354013	4.29033	1.30007	0.261199	0.62367
ENSMUSG00000027951	ENSMUSG00000027951	56417	Adar	adenosine deaminase, RNA-specific	0.397417	3.79684	7.47269	0.0089544	0.139493
ENSMUSG00000020262	ENSMUSG00000020262	110532	Adarb1	adenosine deaminase, RNA-specific, B1	0.188864	2.56033	0.441528	0.509812	0.804059
ENSMUSG00000031949	ENSMUSG00000031949	30947	Adat1	adenosine deaminase, tRNA-specific 1	0.286679	1.52802	0.698716	0.407679	0.744236
ENSMUSG00000019808	ENSMUSG00000019808	66757	Adat2	adenosine deaminase, tRNA-specific 2	0.040102	1.16653	0.00945798	0.922963	0.978689
ENSMUSG00000021044	ENSMUSG00000021044	72113	Adck1	aarF domain containing kinase 1	0.0629582	3.37271	0.108812	0.743048	0.917386
ENSMUSG00000046947	ENSMUSG00000046947	57869	Adck2	aarF domain containing kinase 2	0.636154	2.82775	5.76097	0.0206305	0.208847
ENSMUSG00000022550	ENSMUSG00000022550	268822	Adck5	aarF domain containing kinase 5	0.411289	4.09356	5.65743	0.0217337	0.215147
ENSMUSG00000022220	ENSMUSG00000022220	104110	Adcy4	adenylate cyclase 4	-0.377594	2.15734	2.01867	0.162341	0.528578
ENSMUSG00000022994	ENSMUSG00000022994	11512	Adcy6	adenylate cyclase 6	-0.559896	3.7451	7.52903	0.00871854	0.13877
ENSMUSG00000031659	ENSMUSG00000031659	11513	Adcy7	adenylate cyclase 7	-1.05845	1.46759	5.90913	0.019155	0.201296
ENSMUSG00000005580	ENSMUSG00000005580	11515	Adcy9	adenylate cyclase 9	0.284747	4.37581	2.37202	0.130604	0.483299
ENSMUSG00000029778	ENSMUSG00000029778	11517	Adcyap1r1	adenylate cyclase activating polypeptide 1 receptor 1	-0.209277	1.28157	0.188773	0.666038	0.884869
ENSMUSG00000029106	ENSMUSG00000029106	11518	Add1	adducin 1 (alpha)	-0.396603	4.91514	9.83968	0.00302472	0.0813726
ENSMUSG00000025026	ENSMUSG00000025026	27360	Add3	adducin 3 (gamma)	0.235621	4.00735	1.66948	0.202994	0.574336
ENSMUSG00000029090	ENSMUSG00000029090	70693	Adgra3	adhesion G protein-coupled receptor A3	-0.311637	4.14684	1.89052	0.17617	0.547433
ENSMUSG00000004730	ENSMUSG00000004730	13733	Adgre1	adhesion G protein-coupled receptor E1	-0.366022	3.79378	2.24649	0.141104	0.498975
ENSMUSG00000032915	ENSMUSG00000032915	52614	Adgre4	adhesion G protein-coupled receptor E4	-0.13065	1.23925	0.0610597	0.805973	0.936955
ENSMUSG00000002885	ENSMUSG00000002885	26364	Adgre5	adhesion G protein-coupled receptor E5	-0.278639	4.06724	2.34206	0.132997	0.486794
ENSMUSG00000056492	ENSMUSG00000056492	224792	Adgrf5	adhesion G protein-coupled receptor F5	0.105226	4.71231	0.439595	0.510736	0.804362
ENSMUSG00000031785	ENSMUSG00000031785	14766	Adgrg1	adhesion G protein-coupled receptor G1	0.343171	1.17194	0.646454	0.425655	0.757686
ENSMUSG00000031298	ENSMUSG00000031298	237175	Adgrg2	adhesion G protein-coupled receptor G2	-1.57172	1.93065	20.9864	3.7207e-05	0.00695516
ENSMUSG00000060470	ENSMUSG00000060470	54672	Adgrg3	adhesion G protein-coupled receptor G3	-0.452496	2.4462	3.55816	0.0657853	0.356274
ENSMUSG00000013033	ENSMUSG00000013033	330814	Adgrl1	adhesion G protein-coupled receptor L1	0.0183654	3.20964	0.00634189	0.936884	0.982985
ENSMUSG00000028184	ENSMUSG00000028184	99633	Adgrl2	adhesion G protein-coupled receptor L2	0.244144	4.48859	2.88685	0.0962826	0.428953
ENSMUSG00000039167	ENSMUSG00000039167	170757	Adgrl4	adhesion G protein-coupled receptor L4	0.0281057	3.63949	0.0271477	0.869874	0.960966
ENSMUSG00000069170	ENSMUSG00000069170	110789	Adgrv1	adhesion G protein-coupled receptor V1	-0.65751	2.91216	4.25319	0.0452115	0.302939
ENSMUSG00000074207	ENSMUSG00000074207	11522	Adh1	alcohol dehydrogenase 1 (class I)	-0.140025	11.06	1.12865	0.293792	0.656796
ENSMUSG00000037797	ENSMUSG00000037797	26876	Adh4	alcohol dehydrogenase 4 (class II), pi polypeptide	0.516836	5.79033	13.6703	0.000594938	0.0315408
ENSMUSG00000028138	ENSMUSG00000028138	11532	Adh5	alcohol dehydrogenase 5 (class III), chi polypeptide	0.0262022	7.80094	0.0419421	0.838663	0.948111
ENSMUSG00000055301	ENSMUSG00000055301	11529	Adh7	alcohol dehydrogenase 7 (class IV), mu or sigma polypeptide	-0.00154068	1.78037	2.9985e-05	0.995655	0.999463
ENSMUSG00000025911	ENSMUSG00000025911	76187	Adhfe1	alcohol dehydrogenase, iron containing, 1	-0.0796199	5.70178	0.106769	0.745567	0.917508
ENSMUSG00000020629	ENSMUSG00000020629	104923	Adi1	acireductone dioxygenase 1	0.0575894	6.25205	0.176028	0.676826	0.890393
ENSMUSG00000026457	ENSMUSG00000026457	72674	Adipor1	adiponectin receptor 1	0.0944588	5.44289	0.649789	0.424472	0.756505
ENSMUSG00000030168	ENSMUSG00000030168	68465	Adipor2	adiponectin receptor 2	0.177789	8.42789	2.42771	0.126286	0.479269
ENSMUSG00000039197	ENSMUSG00000039197	11534	Adk	adenosine kinase	0.151726	9.245	2.26521	0.139369	0.496607
ENSMUSG00000030790	ENSMUSG00000030790	11535	Adm	adrenomedullin	-0.167007	0.800841	0.127426	0.722802	0.910011
ENSMUSG00000053950	ENSMUSG00000053950	240442	Adnp2	ADNP homeobox 2	-0.330376	1.06592	0.464389	0.499109	0.800757
ENSMUSG00000057134	ENSMUSG00000057134	211488	Ado	2-aminoethanethiol (cysteamine) dioxygenase	0.169437	3.91835	1.71167	0.197482	0.567941
ENSMUSG00000042429	ENSMUSG00000042429	11539	Adora1	adenosine A1 receptor	-0.31247	5.70757	4.33942	0.0430125	0.295189
ENSMUSG00000025236	ENSMUSG00000025236	72141	Adpgk	ADP-dependent glucokinase	0.106142	2.93839	0.133054	0.717013	0.908485
ENSMUSG00000002844	ENSMUSG00000002844	11544	Adprh	ADP-ribosylarginine hydrolase	-0.142848	2.98473	0.431138	0.51481	0.806753
ENSMUSG00000042558	ENSMUSG00000042558	100206	Adprhl2	ADP-ribosylhydrolase like 2	-0.0847657	3.3266	0.145074	0.705099	0.904191
ENSMUSG00000020910	ENSMUSG00000020910	66358	Adprm	ADP-ribose/CDP-alcohol diphosphatase, manganese dependent	0.0884383	3.68243	0.258703	0.613523	0.860526
ENSMUSG00000045875	ENSMUSG00000045875	11549	Adra1a	adrenergic receptor, alpha 1a	0.114548	2.6282	0.291011	0.592261	0.850761
ENSMUSG00000050541	ENSMUSG00000050541	11548	Adra1b	adrenergic receptor, alpha 1b	-0.0876928	6.0708	0.430587	0.515078	0.806914
ENSMUSG00000058620	ENSMUSG00000058620	11552	Adra2b	adrenergic receptor, alpha 2b	-0.0842513	2.17855	0.077591	0.781878	0.930783
ENSMUSG00000035283	ENSMUSG00000035283	11554	Adrb1	adrenergic receptor, beta 1	-0.332933	1.37353	0.520605	0.474356	0.787828
ENSMUSG00000031489	ENSMUSG00000031489	11556	Adrb3	adrenergic receptor, beta 3	1.39597	2.74355	22.3179	2.33385e-05	0.00540606
ENSMUSG00000039041	ENSMUSG00000039041	56436	Adrm1	adhesion regulating molecule 1	0.351174	6.345	4.7804	0.0340829	0.26558
ENSMUSG00000022407	ENSMUSG00000022407	11564	Adsl	adenylosuccinate lyase	0.357744	2.40849	2.30387	0.136121	0.49223
ENSMUSG00000015961	ENSMUSG00000015961	11566	Adss	adenylosuccinate synthetase, non muscle	-0.285095	5.01541	5.55457	0.0228928	0.219908
ENSMUSG00000011148	ENSMUSG00000011148	11565	Adssl1	adenylosuccinate synthetase like 1	-0.241645	3.12975	1.0532	0.310315	0.668663
ENSMUSG00000058022	ENSMUSG00000058022	109254	Adtrp	androgen dependent TFPI regulating protein	0.417244	6.91032	11.0278	0.00179833	0.0613949
ENSMUSG00000030232	ENSMUSG00000030232	11569	Aebp2	AE binding protein 2	-0.453826	4.43891	7.51745	0.00876647	0.13877
ENSMUSG00000030609	ENSMUSG00000030609	68048	Aen	apoptosis enhancing nuclease	-0.28776	3.81978	1.55289	0.219229	0.586781
ENSMUSG00000029094	ENSMUSG00000029094	70292	Afap1	actin filament associated protein 1	-0.0988654	1.32045	0.050175	0.823784	0.943686
ENSMUSG00000033032	ENSMUSG00000033032	106877	Afap1l1	actin filament associated protein 1-like 1	0.117356	1.35924	0.121645	0.728901	0.911861
ENSMUSG00000068036	ENSMUSG00000068036	17356	Afdn	afadin, adherens junction formation factor	0.0679052	5.61131	0.514732	0.476844	0.789587
ENSMUSG00000029313	ENSMUSG00000029313	17355	Aff1	AF4/FMR2 family, member 1	0.280523	3.98549	3.15575	0.0824927	0.400047
ENSMUSG00000049470	ENSMUSG00000049470	93736	Aff4	AF4/FMR2 family, member 4	-0.0562563	5.12012	0.329185	0.569026	0.838232
ENSMUSG00000038302	ENSMUSG00000038302	215951	Afg1l	AFG1 like ATPase	0.106821	2.31721	0.153518	0.697065	0.900278
ENSMUSG00000031967	ENSMUSG00000031967	114896	Afg3l1	AFG3-like AAA ATPase 1	-0.00240105	5.93999	0.000406783	0.983999	0.995548
ENSMUSG00000024527	ENSMUSG00000024527	69597	Afg3l2	AFG3-like AAA ATPase 2	-0.170106	5.20364	1.03145	0.315306	0.672345
ENSMUSG00000029369	ENSMUSG00000029369	280662	Afm	afamin	0.249646	7.32298	3.82538	0.0567735	0.335681
ENSMUSG00000017718	ENSMUSG00000017718	71562	Afmid	arylformamidase	0.272144	1.60041	0.645492	0.425997	0.757972
ENSMUSG00000049659	ENSMUSG00000049659	216549	Aftph	aftiphilin	-0.043393	5.21744	0.107384	0.744678	0.917508
ENSMUSG00000031521	ENSMUSG00000031521	11593	Aga	aspartylglucosaminidase	-0.562335	4.94576	11.3269	0.0015814	0.0585271
ENSMUSG00000055013	ENSMUSG00000055013	347722	Agap1	ArfGAP with GTPase domain, ankyrin repeat and PH domain 1	-0.00994073	3.60551	0.00571925	0.940056	0.983004
ENSMUSG00000023353	ENSMUSG00000023353	213990	Agap3	ArfGAP with GTPase domain, ankyrin repeat and PH domain 3	-0.00217062	3.78085	9.99397e-05	0.992068	0.99812
ENSMUSG00000038836	ENSMUSG00000038836	76223	Agbl3	ATP/GTP binding protein-like 3	-0.097486	1.8573	0.084641	0.772455	0.926687
ENSMUSG00000029165	ENSMUSG00000029165	231093	Agbl5	ATP/GTP binding protein-like 5	0.0971546	1.23791	0.0722403	0.789344	0.932703
ENSMUSG00000026159	ENSMUSG00000026159	15463	Agfg1	ArfGAP with FG repeats 1	-0.257529	4.13758	2.4158	0.127196	0.479269
ENSMUSG00000029722	ENSMUSG00000029722	231801	Agfg2	ArfGAP with FG repeats 2	0.240371	6.45585	2.27492	0.138545	0.495638
ENSMUSG00000021681	ENSMUSG00000021681	66549	Aggf1	angiogenic factor with G patch and FHA domains 1	0.0244923	4.8446	0.02472	0.875777	0.962738
ENSMUSG00000029916	ENSMUSG00000029916	69923	Agk	acylglycerol kinase	-0.433213	1.88761	2.19424	0.14557	0.505037
ENSMUSG00000033400	ENSMUSG00000033400	77559	Agl	amylo-1,6-glucosidase, 4-alpha-glucanotransferase	0.167808	5.54	2.5131	0.119981	0.468367
ENSMUSG00000040706	ENSMUSG00000040706	75986	Agmat	agmatine ureohydrolase (agmatinase)	0.125839	7.34132	0.7009	0.406952	0.743814
ENSMUSG00000050103	ENSMUSG00000050103	319660	Agmo	alkylglycerol monooxygenase	-0.227195	5.42066	1.91716	0.17307	0.543581
ENSMUSG00000041530	ENSMUSG00000041530	236511	Ago1	argonaute RISC catalytic subunit 1	-0.127288	3.5311	0.614439	0.437271	0.766718
ENSMUSG00000036698	ENSMUSG00000036698	239528	Ago2	argonaute RISC catalytic subunit 2	0.0504611	5.04828	0.233223	0.63151	0.867885
ENSMUSG00000028842	ENSMUSG00000028842	214150	Ago3	argonaute RISC catalytic subunit 3	0.00428704	3.13554	0.000488352	0.982468	0.995137
ENSMUSG00000042500	ENSMUSG00000042500	76850	Ago4	argonaute RISC catalytic subunit 4	0.264758	1.92467	0.603525	0.441344	0.769187
ENSMUSG00000034254	ENSMUSG00000034254	55979	Agpat1	1-acylglycerol-3-phosphate O-acyltransferase 1 (lysophosphatidic acid acyltransferase, alpha)	0.0914309	2.3266	0.180182	0.673261	0.888952
ENSMUSG00000026922	ENSMUSG00000026922	67512	Agpat2	1-acylglycerol-3-phosphate O-acyltransferase 2 (lysophosphatidic acid acyltransferase, beta)	0.273173	7.36258	5.34395	0.0254793	0.232329
ENSMUSG00000001211	ENSMUSG00000001211	28169	Agpat3	1-acylglycerol-3-phosphate O-acyltransferase 3	-0.0909607	6.74649	0.693731	0.409344	0.745029
ENSMUSG00000023827	ENSMUSG00000023827	68262	Agpat4	1-acylglycerol-3-phosphate O-acyltransferase 4 (lysophosphatidic acid acyltransferase, delta)	-0.946002	0.919172	5.52438	0.0232455	0.22176
ENSMUSG00000031467	ENSMUSG00000031467	52123	Agpat5	1-acylglycerol-3-phosphate O-acyltransferase 5 (lysophosphatidic acid acyltransferase, epsilon)	0.0617868	3.49973	0.151796	0.698682	0.901316
ENSMUSG00000042410	ENSMUSG00000042410	228061	Agps	alkylglycerone phosphate synthase	-0.14052	2.73985	0.263853	0.610025	0.85899
ENSMUSG00000041936	ENSMUSG00000041936	11603	Agrn	agrin	-0.13909	4.36011	0.75958	0.388135	0.732758
ENSMUSG00000031980	ENSMUSG00000031980	11606	Agt	angiotensinogen (serpin peptidase inhibitor, clade A, member 8)	0.180763	8.83921	3.05158	0.0875537	0.412187
ENSMUSG00000021557	ENSMUSG00000021557	67269	Agtpbp1	ATP/GTP binding protein 1	-0.346843	3.75536	4.61393	0.0371919	0.276778
ENSMUSG00000049115	ENSMUSG00000049115	11607	Agtr1a	angiotensin II receptor, type 1a	0.240753	5.21547	2.43897	0.125434	0.478143
ENSMUSG00000029007	ENSMUSG00000029007	11610	Agtrap	angiotensin II, type I receptor-associated protein	-0.0527162	2.14453	0.0372741	0.847786	0.952014
ENSMUSG00000026272	ENSMUSG00000026272	11611	Agxt	alanine-glyoxylate aminotransferase	0.740814	6.79517	17.3034	0.00014726	0.0146252
ENSMUSG00000089678	ENSMUSG00000089678	268782	Agxt2	alanine-glyoxylate aminotransferase 2	-0.0616509	7.40857	0.407492	0.526515	0.812771
ENSMUSG00000026491	ENSMUSG00000026491	226747	Ahctf1	AT hook containing transcription factor 1	0.350678	3.82232	5.43164	0.024366	0.227409
ENSMUSG00000027597	ENSMUSG00000027597	269378	Ahcy	S-adenosylhomocysteine hydrolase	0.352788	9.61806	4.8654	0.0326052	0.261694
ENSMUSG00000027893	ENSMUSG00000027893	229709	Ahcyl1	S-adenosylhomocysteine hydrolase-like 1	0.0676561	6.15806	0.292307	0.59144	0.850072
ENSMUSG00000029772	ENSMUSG00000029772	74340	Ahcyl2	S-adenosylhomocysteine hydrolase-like 2	0.103463	3.1785	0.261684	0.611493	0.859425
ENSMUSG00000037692	ENSMUSG00000037692	230793	Ahdc1	AT hook, DNA binding motif, containing 1	0.209235	3.71465	1.65989	0.204273	0.576258
ENSMUSG00000019986	ENSMUSG00000019986	52906	Ahi1	Abelson helper integration site 1	0.409737	1.02089	0.909741	0.345333	0.694732
ENSMUSG00000069833	ENSMUSG00000069833	66395	Ahnak	AHNAK nucleoprotein (desmoyokin)	-0.0346421	4.74162	0.0382879	0.845756	0.950957
ENSMUSG00000019256	ENSMUSG00000019256	11622	Ahr	aryl-hydrocarbon receptor	0.122473	4.63391	0.512894	0.477628	0.790124
ENSMUSG00000021037	ENSMUSG00000021037	217737	Ahsa1	AHA1, activator of heat shock protein ATPase 1	0.239317	6.57391	4.26442	0.0447703	0.301674
ENSMUSG00000020288	ENSMUSG00000020288	268390	Ahsa2	AHA1, activator of heat shock protein ATPase 2	0.107853	4.11098	0.382546	0.539395	0.819685
ENSMUSG00000022868	ENSMUSG00000022868	11625	Ahsg	alpha-2-HS-glycoprotein	0.467343	12.9401	14.4794	0.000429349	0.0265846
ENSMUSG00000035875	ENSMUSG00000035875	98870	AI182371	expressed sequence AI182371	0.599423	7.33919	10.3811	0.00243708	0.0728484
ENSMUSG00000062753	ENSMUSG00000062753	106672	AI413582	expressed sequence AI413582	-0.683293	3.09268	9.71218	0.00320122	0.0835114
ENSMUSG00000112388	ENSMUSG00000112388	100504549	AI463170	expressed sequence AI463170	0.538589	1.39099	2.13144	0.151325	0.513761
ENSMUSG00000105987	ENSMUSG00000105987	433855	AI506816	expressed sequence AI506816	-1.4492	1.57205	6.65857	0.0133913	0.174618
ENSMUSG00000010290	ENSMUSG00000010290	98404	AI597479	expressed sequence AI597479	-0.12185	2.65435	0.274257	0.603087	0.856049
ENSMUSG00000034382	ENSMUSG00000034382	224833	AI661453	expressed sequence AI661453	0.485482	3.468	7.74684	0.00786707	0.134377
ENSMUSG00000087107	ENSMUSG00000087107	100043636	AI662270	expressed sequence AI662270	-0.758442	1.17666	3.63414	0.0630721	0.350094
ENSMUSG00000047423	ENSMUSG00000047423	107242	AI837181	expressed sequence AI837181	0.136698	4.50774	0.754027	0.38986	0.733166
ENSMUSG00000056383	ENSMUSG00000056383	233168	AI987944	expressed sequence AI987944	-0.021139	5.00076	0.0313985	0.860158	0.956808
ENSMUSG00000042901	ENSMUSG00000042901	108909	Aida	axin interactor, dorsalization associated	-0.308464	3.20414	1.76931	0.190241	0.560046
ENSMUSG00000024397	ENSMUSG00000024397	11629	Aif1	allograft inflammatory factor 1	-0.159175	3.35231	0.253162	0.617504	0.86284
ENSMUSG00000036932	ENSMUSG00000036932	26926	Aifm1	apoptosis-inducing factor, mitochondrion-associated 1	-0.0137723	6.11308	0.0159501	0.900068	0.970507
ENSMUSG00000020085	ENSMUSG00000020085	71361	Aifm2	apoptosis-inducing factor, mitochondrion-associated 2	0.169622	4.41155	0.766846	0.385894	0.730804
ENSMUSG00000022763	ENSMUSG00000022763	72168	Aifm3	apoptosis-inducing factor, mitochondrion-associated 3	0.856149	1.73683	9.16556	0.0040911	0.0936688
ENSMUSG00000019806	ENSMUSG00000019806	66253	Aig1	androgen-induced 1	-0.328447	4.17329	4.7077	0.0354046	0.270974
ENSMUSG00000028029	ENSMUSG00000028029	13722	Aimp1	aminoacyl tRNA synthetase complex-interacting multifunctional protein 1	0.00468985	5.51833	0.00166767	0.967608	0.99126
ENSMUSG00000029610	ENSMUSG00000029610	231872	Aimp2	aminoacyl tRNA synthetase complex-interacting multifunctional protein 2	0.373809	3.54149	4.26313	0.0448013	0.301694
ENSMUSG00000024847	ENSMUSG00000024847	11632	Aip	aryl-hydrocarbon receptor-interacting protein	0.109715	3.81535	0.314689	0.577629	0.843838
ENSMUSG00000078247	ENSMUSG00000078247	104103	Airn	antisense Igf2r RNA	-0.291371	1.93542	0.971231	0.329698	0.68163
ENSMUSG00000022178	ENSMUSG00000022178	16475	Ajuba	ajuba LIM protein	0.0706431	2.28504	0.0370801	0.848178	0.952042
ENSMUSG00000028792	ENSMUSG00000028792	11637	Ak2	adenylate kinase 2	-0.0460259	7.8689	0.109024	0.742806	0.917359
ENSMUSG00000024782	ENSMUSG00000024782	56248	Ak3	adenylate kinase 3	0.386423	7.60318	4.88245	0.0324009	0.261694
ENSMUSG00000028527	ENSMUSG00000028527	11639	Ak4	adenylate kinase 4	-0.320034	5.59676	4.1184	0.0484221	0.310676
ENSMUSG00000018428	ENSMUSG00000018428	11640	Akap1	A kinase (PRKA) anchor protein 1	0.028916	6.3568	0.0453912	0.832259	0.947141
ENSMUSG00000047804	ENSMUSG00000047804	56697	Akap10	A kinase (PRKA) anchor protein 10	0.26916	2.12707	1.74253	0.193565	0.562988
ENSMUSG00000022016	ENSMUSG00000022016	219181	Akap11	A kinase (PRKA) anchor protein 11	0.0194048	4.71367	0.0190363	0.890884	0.967582
ENSMUSG00000038587	ENSMUSG00000038587	83397	Akap12	A kinase (PRKA) anchor protein (gravin) 12	-0.120514	2.45564	0.217371	0.643323	0.874312
ENSMUSG00000066406	ENSMUSG00000066406	75547	Akap13	A kinase (PRKA) anchor protein 13	0.0989871	6.21799	0.539252	0.466593	0.785206
ENSMUSG00000059708	ENSMUSG00000059708	338351	Akap17b	A kinase (PRKA) anchor protein 17B	0.454214	2.78949	3.40619	0.0716077	0.370602
ENSMUSG00000039166	ENSMUSG00000039166	432442	Akap7	A kinase (PRKA) anchor protein 7	-0.0704642	3.95875	0.148004	0.702281	0.902897
ENSMUSG00000024045	ENSMUSG00000024045	56399	Akap8	A kinase (PRKA) anchor protein 8	0.270756	4.03673	2.92869	0.0939767	0.425441
ENSMUSG00000002625	ENSMUSG00000002625	54194	Akap8l	A kinase (PRKA) anchor protein 8-like	0.453901	4.52337	3.75556	0.0593589	0.341219
ENSMUSG00000040407	ENSMUSG00000040407	100986	Akap9	A kinase (PRKA) anchor protein (yotiao) 9	0.186711	6.56872	3.03814	0.0882316	0.413888
ENSMUSG00000031023	ENSMUSG00000031023	57373	Akip1	A kinase (PRKA) interacting protein 1	0.0039661	4.35849	0.000616224	0.980306	0.994816
ENSMUSG00000023075	ENSMUSG00000023075	68050	Akirin1	akirin 1	-0.0984106	4.13235	0.462762	0.499858	0.801093
ENSMUSG00000028291	ENSMUSG00000028291	433693	Akirin2	akirin 2	-0.30862	4.31565	3.60283	0.064175	0.352239
ENSMUSG00000028692	ENSMUSG00000028692	58810	Akr1a1	aldo-keto reductase family 1, member A1 (aldehyde reductase)	-0.241559	8.6785	5.30411	0.026003	0.233961
ENSMUSG00000061758	ENSMUSG00000061758	67861	Akr1b10	aldo-keto reductase family 1, member B10 (aldose reductase)	-0.43394	1.22286	1.09139	0.301803	0.662661
ENSMUSG00000001642	ENSMUSG00000001642	11677	Akr1b3	aldo-keto reductase family 1, member B3 (aldose reductase)	-0.499701	3.27882	4.38697	0.041937	0.292826
ENSMUSG00000029762	ENSMUSG00000029762	14187	Akr1b8	aldo-keto reductase family 1, member B8	0.0288261	1.12758	0.00486926	0.944681	0.984188
ENSMUSG00000021211	ENSMUSG00000021211	622402	Akr1c12	aldo-keto reductase family 1, member C12	-0.109052	5.50179	0.176639	0.676576	0.890393
ENSMUSG00000021213	ENSMUSG00000021213	27384	Akr1c13	aldo-keto reductase family 1, member C13	-0.133656	6.60304	0.503697	0.481741	0.792197
ENSMUSG00000033715	ENSMUSG00000033715	105387	Akr1c14	aldo-keto reductase family 1, member C14	0.13356	5.87985	0.296101	0.589402	0.848755
ENSMUSG00000071551	ENSMUSG00000071551	432720	Akr1c19	aldo-keto reductase family 1, member C19	-0.202737	5.65273	1.50514	0.22633	0.593888
ENSMUSG00000054757	ENSMUSG00000054757	116852	Akr1c20	aldo-keto reductase family 1, member C20	-0.190939	5.9474	0.923268	0.34209	0.693338
ENSMUSG00000021210	ENSMUSG00000021210	83702	Akr1c6	aldo-keto reductase family 1, member C6	0.329404	9.61532	3.66477	0.0620137	0.347766
ENSMUSG00000038641	ENSMUSG00000038641	208665	Akr1d1	aldo-keto reductase family 1, member D1	0.291261	5.9106	1.61979	0.210424	0.580163
ENSMUSG00000045410	ENSMUSG00000045410	56043	Akr1e1	aldo-keto reductase family 1, member E1	-0.183779	5.01654	1.53521	0.221824	0.588959
ENSMUSG00000028743	ENSMUSG00000028743	110198	Akr7a5	aldo-keto reductase family 7, member A5 (aflatoxin aldehyde reductase)	0.0484447	7.90477	0.147279	0.702976	0.903142
ENSMUSG00000001729	ENSMUSG00000001729	11651	Akt1	thymoma viral proto-oncogene 1	-0.249512	5.2227	2.55134	0.117274	0.465162
ENSMUSG00000011096	ENSMUSG00000011096	67605	Akt1s1	AKT1 substrate 1 (proline-rich)	0.0322538	2.75994	0.0232956	0.87938	0.964236
ENSMUSG00000004056	ENSMUSG00000004056	11652	Akt2	thymoma viral proto-oncogene 2	0.0783878	6.2297	0.5391	0.466655	0.785206
ENSMUSG00000019699	ENSMUSG00000019699	23797	Akt3	thymoma viral proto-oncogene 3	-0.515356	1.38728	2.19592	0.145419	0.505037
ENSMUSG00000031667	ENSMUSG00000031667	14339	Aktip	thymoma viral proto-oncogene 1 interacting protein	0.0176328	3.04926	0.0123284	0.912089	0.974676
ENSMUSG00000028393	ENSMUSG00000028393	17025	Alad	aminolevulinate, delta-, dehydratase	0.158161	6.56886	1.10387	0.299088	0.660881
ENSMUSG00000032786	ENSMUSG00000032786	11655	Alas1	aminolevulinic acid synthase 1	-0.479862	7.87437	0.913865	0.345495	0.69493
ENSMUSG00000025270	ENSMUSG00000025270	11656	Alas2	aminolevulinic acid synthase 2, erythroid	0.340876	5.94412	4.34504	0.0428839	0.294871
ENSMUSG00000029368	ENSMUSG00000029368	11657	Alb	albumin	-0.0327995	15.5481	0.0250284	0.875012	0.962497
ENSMUSG00000022636	ENSMUSG00000022636	11658	Alcam	activated leukocyte cell adhesion molecule	0.0186517	6.29148	0.010508	0.918825	0.977447
ENSMUSG00000007833	ENSMUSG00000007833	69748	Aldh16a1	aldehyde dehydrogenase 16 family, member A1	0.102498	5.28961	0.702805	0.406321	0.743814
ENSMUSG00000053279	ENSMUSG00000053279	11668	Aldh1a1	aldehyde dehydrogenase family 1, subfamily A1	-0.159488	10.1064	1.10216	0.299457	0.661033
ENSMUSG00000024747	ENSMUSG00000024747	26358	Aldh1a7	aldehyde dehydrogenase family 1, subfamily A7	-0.205038	7.54881	2.22213	0.143096	0.501581
ENSMUSG00000035561	ENSMUSG00000035561	72535	Aldh1b1	aldehyde dehydrogenase 1 family, member B1	-0.597455	6.33191	5.33119	0.0264016	0.23541
ENSMUSG00000030088	ENSMUSG00000030088	107747	Aldh1l1	aldehyde dehydrogenase 1 family, member L1	0.403657	8.17367	9.62469	0.00332863	0.0840891
ENSMUSG00000029455	ENSMUSG00000029455	11669	Aldh2	aldehyde dehydrogenase 2, mitochondrial	0.330635	10.5302	3.48602	0.0684812	0.362704
ENSMUSG00000010025	ENSMUSG00000010025	11671	Aldh3a2	aldehyde dehydrogenase family 3, subfamily A2	-0.724095	8.21852	12.4005	0.00105455	0.0460577
ENSMUSG00000028737	ENSMUSG00000028737	212647	Aldh4a1	aldehyde dehydrogenase 4 family, member A1	0.290819	8.11112	4.15328	0.047521	0.309361
ENSMUSG00000035936	ENSMUSG00000035936	214579	Aldh5a1	aldhehyde dehydrogenase family 5, subfamily A1	-0.232178	5.36619	4.9629	0.0309951	0.255781
ENSMUSG00000021238	ENSMUSG00000021238	104776	Aldh6a1	aldehyde dehydrogenase family 6, subfamily A1	0.140374	7.3608	0.340399	0.562939	0.833311
ENSMUSG00000053644	ENSMUSG00000053644	110695	Aldh7a1	aldehyde dehydrogenase family 7, member A1	0.205655	8.23132	3.6644	0.0620264	0.347766
ENSMUSG00000037542	ENSMUSG00000037542	237320	Aldh8a1	aldehyde dehydrogenase 8 family, member A1	0.0280078	7.9249	0.0501691	0.823794	0.943686
ENSMUSG00000026687	ENSMUSG00000026687	56752	Aldh9a1	aldehyde dehydrogenase 9, subfamily A1	0.200083	7.01239	3.74195	0.0594321	0.341457
ENSMUSG00000030695	ENSMUSG00000030695	11674	Aldoa	aldolase A, fructose-bisphosphate	-0.218458	6.24131	2.66464	0.109654	0.45322
ENSMUSG00000028307	ENSMUSG00000028307	230163	Aldob	aldolase B, fructose-bisphosphate	-0.407937	11.6392	9.36422	0.00374068	0.0886639
ENSMUSG00000017390	ENSMUSG00000017390	11676	Aldoc	aldolase C, fructose-bisphosphate	0.0952859	3.81492	0.0806688	0.77789	0.929026
ENSMUSG00000039427	ENSMUSG00000039427	208211	Alg1	asparagine-linked glycosylation 1 (beta-1,4-mannosyltransferase)	0.0755675	4.31261	0.241318	0.625668	0.865957
ENSMUSG00000075470	ENSMUSG00000075470	380959	Alg10b	asparagine-linked glycosylation 10B (alpha-1,2-glucosyltransferase)	0.337197	2.89331	0.749629	0.391717	0.733755
ENSMUSG00000063362	ENSMUSG00000063362	207958	Alg11	asparagine-linked glycosylation 11 (alpha-1,2-mannosyltransferase)	0.400354	4.74864	7.6964	0.00805606	0.136307
ENSMUSG00000035845	ENSMUSG00000035845	223774	Alg12	asparagine-linked glycosylation 12 (alpha-1,6-mannosyltransferase)	-0.37605	1.59448	1.2061	0.278009	0.641573
ENSMUSG00000041718	ENSMUSG00000041718	67574	Alg13	asparagine-linked glycosylation 13	0.138343	1.97132	0.205348	0.652639	0.878834
ENSMUSG00000039887	ENSMUSG00000039887	66789	Alg14	asparagine-linked glycosylation 14	-0.0705362	3.90103	0.162486	0.688807	0.895091
ENSMUSG00000039740	ENSMUSG00000039740	56737	Alg2	asparagine-linked glycosylation 2 (alpha-1,3-mannosyltransferase)	-0.345224	2.42712	2.32327	0.134523	0.488803
ENSMUSG00000033809	ENSMUSG00000033809	208624	Alg3	asparagine-linked glycosylation 3 (alpha-1,3-mannosyltransferase)	0.09422	3.15223	0.215546	0.644717	0.875034
ENSMUSG00000036632	ENSMUSG00000036632	66248	Alg5	asparagine-linked glycosylation 5 (dolichyl-phosphate beta-glucosyltransferase)	-0.0345847	5.13473	0.0852064	0.771718	0.926423
ENSMUSG00000073792	ENSMUSG00000073792	320438	Alg6	asparagine-linked glycosylation 6 (alpha-1,3,-glucosyltransferase)	0.0189704	3.67169	0.0116988	0.914354	0.975666
ENSMUSG00000035704	ENSMUSG00000035704	381903	Alg8	asparagine-linked glycosylation 8 (alpha-1,3-glucosyltransferase)	-0.0849727	2.76554	0.177856	0.675251	0.889806
ENSMUSG00000032059	ENSMUSG00000032059	102580	Alg9	asparagine-linked glycosylation 9 (alpha 1,2 mannosyltransferase)	0.012142	3.61529	0.00421764	0.94851	0.985604
ENSMUSG00000079036	ENSMUSG00000079036	211064	Alkbh1	alkB homolog 1, histone H2A dioxygenase	-0.0882949	3.18168	0.227004	0.636084	0.870077
ENSMUSG00000044339	ENSMUSG00000044339	231642	Alkbh2	alkB homolog 2, alpha-ketoglutarate-dependent dioxygenase	0.0187903	2.58662	0.00856472	0.92668	0.979493
ENSMUSG00000040174	ENSMUSG00000040174	69113	Alkbh3	alkB homolog 3, alpha-ketoglutarate-dependent dioxygenase	-0.0830751	3.84172	0.287409	0.594554	0.852044
ENSMUSG00000039754	ENSMUSG00000039754	72041	Alkbh4	alkB homolog 4, lysine demethylase	0.22656	1.54561	0.671715	0.41682	0.750945
ENSMUSG00000042650	ENSMUSG00000042650	268420	Alkbh5	alkB homolog 5, RNA demethylase	-0.0525778	5.29076	0.0431482	0.836507	0.947361
ENSMUSG00000042831	ENSMUSG00000042831	233065	Alkbh6	alkB homolog 6	-0.59008	2.74142	4.94869	0.0312243	0.256884
ENSMUSG00000002661	ENSMUSG00000002661	66400	Alkbh7	alkB homolog 7	0.188308	3.29692	1.1383	0.291763	0.655165
ENSMUSG00000025899	ENSMUSG00000025899	67667	Alkbh8	alkB homolog 8, tRNA methyltransferase	0.361037	3.62674	3.93464	0.0534879	0.32574
ENSMUSG00000063810	ENSMUSG00000063810	236266	Alms1	ALMS1, centrosome and basal body associated	-0.468744	1.21052	1.48525	0.229373	0.59661
ENSMUSG00000060063	ENSMUSG00000060063	11690	Alox5ap	arachidonate 5-lipoxygenase activating protein	-0.55831	1.67664	2.21821	0.143441	0.502135
ENSMUSG00000028766	ENSMUSG00000028766	11647	Alpl	alkaline phosphatase, liver/bone/kidney	-0.63366	3.68466	9.6286	0.00332282	0.0840891
ENSMUSG00000026024	ENSMUSG00000026024	74018	Als2	alsin Rho guanine nucleotide exchange factor	0.417546	2.19238	2.8885	0.0961904	0.428953
ENSMUSG00000044037	ENSMUSG00000044037	235633	Als2cl	ALS2 C-terminal like	0.276008	3.45276	1.81055	0.185254	0.554975
ENSMUSG00000025134	ENSMUSG00000025134	21681	Alyref	Aly/REF export factor	0.0887203	3.09069	0.117539	0.733332	0.912894
ENSMUSG00000060244	ENSMUSG00000060244	56009	Alyref2	Aly/REF export factor 2	0.617349	2.05878	4.85143	0.0328434	0.261694
ENSMUSG00000022244	ENSMUSG00000022244	17117	Amacr	alpha-methylacyl-CoA racemase	0.0529228	6.35268	0.0373736	0.847738	0.952014
ENSMUSG00000028356	ENSMUSG00000028356	11699	Ambp	alpha 1 microglobulin/bikunin precursor	0.100583	10.4835	0.78738	0.379661	0.72632
ENSMUSG00000040506	ENSMUSG00000040506	228361	Ambra1	autophagy/beclin 1 regulator 1	0.220328	3.02053	1.28276	0.263449	0.625133
ENSMUSG00000075232	ENSMUSG00000075232	11702	Amd1	S-adenosylmethionine decarboxylase 1	0.128887	6.95933	0.871537	0.355565	0.703999
ENSMUSG00000063953	ENSMUSG00000063953	100041585	Amd2	S-adenosylmethionine decarboxylase 2	0.17558	6.62918	1.5971	0.212891	0.582169
ENSMUSG00000015890	ENSMUSG00000015890	71761	Amdhd1	amidohydrolase domain containing 1	0.308068	7.09861	4.63601	0.0367624	0.27635
ENSMUSG00000036820	ENSMUSG00000036820	245847	Amdhd2	amidohydrolase domain containing 2	-0.512606	3.90044	6.80945	0.0123039	0.168294
ENSMUSG00000050332	ENSMUSG00000050332	72345	Amer1	APC membrane recruitment 1	-0.0720862	2.68362	0.135227	0.714815	0.908298
ENSMUSG00000031751	ENSMUSG00000031751	23802	Amfr	autocrine motility factor receptor	0.163604	6.61522	3.09315	0.0854933	0.407134
ENSMUSG00000050947	ENSMUSG00000050947	229715	Amigo1	adhesion molecule with Ig like domain 1	0.426544	1.09103	1.64017	0.206933	0.577914
ENSMUSG00000048218	ENSMUSG00000048218	105827	Amigo2	adhesion molecule with Ig like domain 2	0.042732	3.00825	0.0325098	0.857731	0.95572
ENSMUSG00000042225	ENSMUSG00000042225	56068	Ammecr1	Alport syndrome, mental retardation, midface hypoplasia and elliptocytosis chromosomal region gene 1	-0.131253	2.14544	0.222515	0.639434	0.87211
ENSMUSG00000041915	ENSMUSG00000041915	225339	Ammecr1l	AMME chromosomal region gene 1-like	0.0603123	5.51557	0.239702	0.626825	0.866528
ENSMUSG00000068250	ENSMUSG00000068250	232566	Amn1	antagonist of mitotic exit network 1	0.02852	4.33269	0.01765	0.894916	0.968856
ENSMUSG00000041688	ENSMUSG00000041688	27494	Amot	angiomotin	0.0126597	2.37874	0.00278807	0.958126	0.987643
ENSMUSG00000013076	ENSMUSG00000013076	75723	Amotl1	angiomotin-like 1	-0.0739053	3.8263	0.145806	0.704392	0.90399
ENSMUSG00000032531	ENSMUSG00000032531	56332	Amotl2	angiomotin-like 2	0.429452	4.23881	5.78691	0.0203635	0.207648
ENSMUSG00000027889	ENSMUSG00000027889	109674	Ampd2	adenosine monophosphate deaminase 2	-0.26276	3.70918	1.35084	0.251323	0.615915
ENSMUSG00000032607	ENSMUSG00000032607	434437	Amt	aminomethyltransferase	0.0806429	5.67225	0.26368	0.610142	0.85899
ENSMUSG00000074264	ENSMUSG00000074264	11722	Amy1	amylase 1, salivary	0.097985	7.40557	0.372514	0.54474	0.823654
ENSMUSG00000050022	ENSMUSG00000050022	231842	Amz1	archaelysin family metallopeptidase 1	-1.22043	0.978443	3.87309	0.0553414	0.331771
ENSMUSG00000020610	ENSMUSG00000020610	13929	Amz2	archaelysin family metallopeptidase 2	-0.233488	4.01327	3.27655	0.077028	0.385534
ENSMUSG00000014355	ENSMUSG00000014355	17222	Anapc1	anaphase promoting complex subunit 1	0.0717615	4.05628	0.246533	0.621969	0.864507
ENSMUSG00000036977	ENSMUSG00000036977	68999	Anapc10	anaphase promoting complex subunit 10	0.091533	2.07832	0.0688457	0.794235	0.93385
ENSMUSG00000025135	ENSMUSG00000025135	66156	Anapc11	anaphase promoting complex subunit 11	0.202323	5.35859	3.36413	0.0733183	0.375205
ENSMUSG00000035048	ENSMUSG00000035048	69010	Anapc13	anaphase promoting complex subunit 13	0.12569	6.02388	0.956837	0.33327	0.685681
ENSMUSG00000030649	ENSMUSG00000030649	75430	Anapc15	anaphase prompoting complex C subunit 15	0.0503571	3.05201	0.0559069	0.814171	0.940216
ENSMUSG00000020107	ENSMUSG00000020107	52717	Anapc16	anaphase promoting complex subunit 16	-0.148613	4.96073	1.64801	0.20587	0.57741
ENSMUSG00000026965	ENSMUSG00000026965	99152	Anapc2	anaphase promoting complex subunit 2	0.0161134	4.39133	0.00824494	0.928057	0.979912
ENSMUSG00000029176	ENSMUSG00000029176	52206	Anapc4	anaphase promoting complex subunit 4	-0.623515	3.84193	13.6701	0.000594999	0.0315408
ENSMUSG00000029472	ENSMUSG00000029472	59008	Anapc5	anaphase-promoting complex subunit 5	0.0824238	5.52126	0.267424	0.607624	0.858202
ENSMUSG00000029466	ENSMUSG00000029466	56317	Anapc7	anaphase promoting complex subunit 7	0.0693737	3.57698	0.171098	0.681124	0.891784
ENSMUSG00000072115	ENSMUSG00000072115	11727	Ang	angiogenin, ribonuclease, RNase A family, 5	0.920851	7.57345	20.8172	4.39626e-05	0.00744611
ENSMUSG00000026634	ENSMUSG00000026634	52477	Angel2	angel homolog 2	-0.0639256	4.18001	0.274358	0.603021	0.856049
ENSMUSG00000022309	ENSMUSG00000022309	11600	Angpt1	angiopoietin 1	0.0247351	0.855479	0.00187236	0.965679	0.990438
ENSMUSG00000004105	ENSMUSG00000004105	26360	Angptl2	angiopoietin-like 2	-0.859489	3.04495	8.57747	0.00536705	0.10946
ENSMUSG00000028553	ENSMUSG00000028553	30924	Angptl3	angiopoietin-like 3	0.137483	9.36255	0.978703	0.327865	0.68062
ENSMUSG00000002289	ENSMUSG00000002289	57875	Angptl4	angiopoietin-like 4	0.325837	6.20976	4.84567	0.032942	0.261694
ENSMUSG00000038742	ENSMUSG00000038742	70726	Angptl6	angiopoietin-like 6	0.420891	4.24927	4.82847	0.0332386	0.262497
ENSMUSG00000047822	ENSMUSG00000047822	624219	Angptl8	angiopoietin-like 8	0.52436	4.2205	4.45958	0.040708	0.288007
ENSMUSG00000022265	ENSMUSG00000022265	11732	Ank	progressive ankylosis	0.060854	4.12407	0.149979	0.7004	0.901851
ENSMUSG00000032826	ENSMUSG00000032826	109676	Ank2	ankyrin 2, brain	-0.339632	0.962787	0.752039	0.390481	0.733267
ENSMUSG00000069601	ENSMUSG00000069601	11735	Ank3	ankyrin 3, epithelial	-0.144877	5.47635	1.08739	0.302678	0.662982
ENSMUSG00000020790	ENSMUSG00000020790	11736	Ankfy1	ankyrin repeat and FYVE domain containing 1	-0.24783	4.22116	3.09315	0.0854936	0.407134
ENSMUSG00000024483	ENSMUSG00000024483	108857	Ankhd1	ankyrin repeat and KH domain containing 1	0.33002	6.18236	8.21632	0.00631803	0.118653
ENSMUSG00000040351	ENSMUSG00000040351	70797	Ankib1	ankyrin repeat and IBR domain containing 1	-0.177857	3.11407	0.690709	0.410358	0.745503
ENSMUSG00000029501	ENSMUSG00000029501	71782	Ankle2	ankyrin repeat and LEM domain containing 2	0.196818	3.87939	1.18963	0.281271	0.644529
ENSMUSG00000036188	ENSMUSG00000036188	217473	Ankmy2	ankyrin repeat and MYND domain containing 2	0.262722	3.0643	1.85588	0.179952	0.550038
ENSMUSG00000021661	ENSMUSG00000021661	68558	Ankra2	ankyrin repeat, family A (RFXANK-like), 2	0.201881	3.82512	1.38128	0.246129	0.612232
ENSMUSG00000031508	ENSMUSG00000031508	102334	Ankrd10	ankyrin repeat domain 10	0.0921275	3.19715	0.237409	0.628474	0.866941
ENSMUSG00000035569	ENSMUSG00000035569	77087	Ankrd11	ankyrin repeat domain 11	0.0795753	6.69229	0.280948	0.598714	0.853865
ENSMUSG00000034647	ENSMUSG00000034647	106585	Ankrd12	ankyrin repeat domain 12	-0.149218	4.93049	0.926624	0.34094	0.692574
ENSMUSG00000041870	ENSMUSG00000041870	68420	Ankrd13a	ankyrin repeat domain 13a	-0.193342	4.03909	1.62534	0.208961	0.578648
ENSMUSG00000039988	ENSMUSG00000039988	433667	Ankrd13c	ankyrin repeat domain 13c	-0.0245713	4.28399	0.0185802	0.892191	0.968118
ENSMUSG00000047909	ENSMUSG00000047909	320816	Ankrd16	ankyrin repeat domain 16	-0.0207658	2.78662	0.0149099	0.903364	0.971172
ENSMUSG00000055204	ENSMUSG00000055204	81702	Ankrd17	ankyrin repeat domain 17	0.0939861	6.41427	0.935177	0.338744	0.691848
ENSMUSG00000054708	ENSMUSG00000054708	70615	Ankrd24	ankyrin repeat domain 24	0.19745	2.11543	0.366529	0.547976	0.825647
ENSMUSG00000007827	ENSMUSG00000007827	232339	Ankrd26	ankyrin repeat domain 26	0.391515	2.8111	2.03485	0.160704	0.525433
ENSMUSG00000034867	ENSMUSG00000034867	245886	Ankrd27	ankyrin repeat domain 27 (VPS9 domain)	-0.190407	4.32961	1.58987	0.213912	0.582972
ENSMUSG00000014496	ENSMUSG00000014496	105522	Ankrd28	ankyrin repeat domain 28	0.0731483	4.08309	0.124344	0.726034	0.911523
ENSMUSG00000022237	ENSMUSG00000022237	67434	Ankrd33b	ankyrin repeat domain 33B	0.714298	3.19134	7.57099	0.00854721	0.138598
ENSMUSG00000079610	ENSMUSG00000079610	109346	Ankrd39	ankyrin repeat domain 39	-0.127557	1.86559	0.142061	0.708031	0.905706
ENSMUSG00000020864	ENSMUSG00000020864	71452	Ankrd40	ankyrin repeat domain 40	-0.15178	5.28734	1.13666	0.292107	0.655277
ENSMUSG00000052331	ENSMUSG00000052331	329154	Ankrd44	ankyrin repeat domain 44	0.321586	3.36964	3.52783	0.0669044	0.35926
ENSMUSG00000048307	ENSMUSG00000048307	68839	Ankrd46	ankyrin repeat domain 46	0.17435	5.53314	1.75026	0.192598	0.562346
ENSMUSG00000031931	ENSMUSG00000031931	56503	Ankrd49	ankyrin repeat domain 49	0.337683	4.20439	3.75479	0.059014	0.340872
ENSMUSG00000044864	ENSMUSG00000044864	99696	Ankrd50	ankyrin repeat domain 50	0.00373742	3.16349	0.000301989	0.986213	0.996596
ENSMUSG00000033055	ENSMUSG00000033055	223690	Ankrd54	ankyrin repeat domain 54	-0.128052	2.31963	0.369079	0.546593	0.825205
ENSMUSG00000037904	ENSMUSG00000037904	74251	Ankrd9	ankyrin repeat domain 9	-0.5055	1.18048	1.0763	0.305127	0.66521
ENSMUSG00000024219	ENSMUSG00000024219	224650	Anks1	ankyrin repeat and SAM domain containing 1	-0.313237	3.5848	3.18802	0.0809919	0.396906
ENSMUSG00000022515	ENSMUSG00000022515	72615	Anks3	ankyrin repeat and sterile alpha motif domain containing 3	0.108553	2.91805	0.378985	0.541281	0.821272
ENSMUSG00000030909	ENSMUSG00000030909	72074	Anks4b	ankyrin repeat and sterile alpha motif domain containing 4B	0.235348	5.39765	2.07641	0.156587	0.519591
ENSMUSG00000026199	ENSMUSG00000026199	52231	Ankzf1	ankyrin repeat and zinc finger domain containing 1	0.25412	3.91934	2.58308	0.11508	0.461216
ENSMUSG00000031075	ENSMUSG00000031075	101772	Ano1	anoctamin 1, calcium activated chloride channel	-0.663535	1.67936	2.18292	0.146588	0.506576
ENSMUSG00000037949	ENSMUSG00000037949	102566	Ano10	anoctamin 10	-0.516222	2.67795	2.22752	0.142826	0.50119
ENSMUSG00000064210	ENSMUSG00000064210	105722	Ano6	anoctamin 6	-0.226003	3.02398	0.882125	0.352687	0.701877
ENSMUSG00000034863	ENSMUSG00000034863	382014	Ano8	anoctamin 8	0.0220874	1.21853	0.00485454	0.944765	0.984188
ENSMUSG00000032249	ENSMUSG00000032249	11737	Anp32a	acidic (leucine-rich) nuclear phosphoprotein 32 family, member A	0.424744	6.3991	6.64408	0.0133326	0.174328
ENSMUSG00000028333	ENSMUSG00000028333	67628	Anp32b	acidic (leucine-rich) nuclear phosphoprotein 32 family, member B	-0.0750657	5.98401	0.379159	0.541189	0.821272
ENSMUSG00000015749	ENSMUSG00000015749	66471	Anp32e	acidic (leucine-rich) nuclear phosphoprotein 32 family, member E	-0.303839	4.27798	2.47723	0.122585	0.472639
ENSMUSG00000039062	ENSMUSG00000039062	16790	Anpep	alanyl (membrane) aminopeptidase	-0.222679	5.11816	1.31034	0.258557	0.621899
ENSMUSG00000029338	ENSMUSG00000029338	71914	Antxr2	anthrax toxin receptor 2	-0.256886	4.45362	1.56249	0.217867	0.586569
ENSMUSG00000024659	ENSMUSG00000024659	16952	Anxa1	annexin A1	-1.18794	1.22522	5.24174	0.0268463	0.236991
ENSMUSG00000021866	ENSMUSG00000021866	11744	Anxa11	annexin A11	0.120333	3.9042	0.307834	0.581789	0.846031
ENSMUSG00000032231	ENSMUSG00000032231	12306	Anxa2	annexin A2	-1.36964	5.4568	8.39915	0.0063674	0.118958
ENSMUSG00000029484	ENSMUSG00000029484	11745	Anxa3	annexin A3	-0.636855	2.58948	3.90649	0.0543139	0.328724
ENSMUSG00000029994	ENSMUSG00000029994	11746	Anxa4	annexin A4	-0.317325	4.75314	6.2355	0.0162893	0.189093
ENSMUSG00000027712	ENSMUSG00000027712	11747	Anxa5	annexin A5	-1.1433	6.68317	15.3887	0.000359114	0.0246142
ENSMUSG00000018340	ENSMUSG00000018340	11749	Anxa6	annexin A6	0.116625	6.47802	0.452895	0.504483	0.802518
ENSMUSG00000021814	ENSMUSG00000021814	11750	Anxa7	annexin A7	-0.430253	5.66586	13.0798	0.00075755	0.0370545
ENSMUSG00000015702	ENSMUSG00000015702	71790	Anxa9	annexin A9	0.0232556	1.17602	0.00348966	0.953158	0.986856
ENSMUSG00000021458	ENSMUSG00000021458	72061	Aopep	aminopeptidase O	-0.0379553	3.76385	0.0549426	0.81575	0.940497
ENSMUSG00000063558	ENSMUSG00000063558	11761	Aox1	aldehyde oxidase 1	-0.476395	5.73217	11.0699	0.00176605	0.0612967
ENSMUSG00000064294	ENSMUSG00000064294	71724	Aox3	aldehyde oxidase 3	0.824874	7.64413	38.9849	1.41173e-07	0.000270675
ENSMUSG00000074238	ENSMUSG00000074238	211556	Ap1ar	adaptor-related protein complex 1 associated regulatory protein	-0.00689216	4.21447	0.00175751	0.966748	0.990684
ENSMUSG00000009090	ENSMUSG00000009090	11764	Ap1b1	adaptor protein complex AP-1, beta 1 subunit	-0.112404	5.2241	0.808451	0.373415	0.721545
ENSMUSG00000031731	ENSMUSG00000031731	11765	Ap1g1	adaptor protein complex AP-1, gamma 1 subunit	0.215776	5.6254	6.02693	0.0180628	0.197382
ENSMUSG00000040701	ENSMUSG00000040701	11766	Ap1g2	adaptor protein complex AP-1, gamma 2 subunit	-0.238759	2.1813	1.20013	0.279185	0.642497
ENSMUSG00000003033	ENSMUSG00000003033	11767	Ap1m1	adaptor-related protein complex AP-1, mu subunit 1	0.0946079	4.09104	0.383208	0.539046	0.819562
ENSMUSG00000004849	ENSMUSG00000004849	11769	Ap1s1	adaptor protein complex AP-1, sigma 1	-0.0438558	4.27601	0.0564021	0.813365	0.940216
ENSMUSG00000031367	ENSMUSG00000031367	108012	Ap1s2	adaptor-related protein complex 1, sigma 2 subunit	-0.166781	2.93834	0.366569	0.547954	0.825647
ENSMUSG00000060279	ENSMUSG00000060279	11771	Ap2a1	adaptor-related protein complex 2, alpha 1 subunit	0.052693	2.11318	0.0544264	0.816602	0.940841
ENSMUSG00000002957	ENSMUSG00000002957	11772	Ap2a2	adaptor-related protein complex 2, alpha 2 subunit	0.100301	5.46244	1.03964	0.313413	0.671082
ENSMUSG00000035152	ENSMUSG00000035152	71770	Ap2b1	adaptor-related protein complex 2, beta 1 subunit	0.290458	5.15987	3.54445	0.0662887	0.356923
ENSMUSG00000022841	ENSMUSG00000022841	11773	Ap2m1	adaptor-related protein complex 2, mu 1 subunit	0.149464	5.70024	1.88702	0.176415	0.547693
ENSMUSG00000008036	ENSMUSG00000008036	232910	Ap2s1	adaptor-related protein complex 2, sigma 1 subunit	0.217156	5.36993	1.18587	0.282239	0.645595
ENSMUSG00000021686	ENSMUSG00000021686	11774	Ap3b1	adaptor-related protein complex 3, beta 1 subunit	0.222326	4.95866	3.09136	0.085581	0.407134
ENSMUSG00000020198	ENSMUSG00000020198	11776	Ap3d1	adaptor-related protein complex 3, delta 1 subunit	0.136716	5.95367	0.593733	0.445102	0.771419
ENSMUSG00000021824	ENSMUSG00000021824	55946	Ap3m1	adaptor-related protein complex 3, mu 1 subunit	0.00580861	6.07687	0.00158096	0.968461	0.991324
ENSMUSG00000031539	ENSMUSG00000031539	64933	Ap3m2	adaptor-related protein complex 3, mu 2 subunit	-0.389341	1.75531	1.20074	0.279065	0.642497
ENSMUSG00000024480	ENSMUSG00000024480	11777	Ap3s1	adaptor-related protein complex 3, sigma 1 subunit	-0.113596	4.66699	0.342444	0.561376	0.833249
ENSMUSG00000063801	ENSMUSG00000063801	11778	Ap3s2	adaptor-related protein complex 3, sigma 2 subunit	0.0521881	3.88272	0.132819	0.717252	0.908485
ENSMUSG00000032952	ENSMUSG00000032952	67489	Ap4b1	adaptor-related protein complex AP-4, beta 1	0.251598	3.12703	1.37582	0.247051	0.612651
ENSMUSG00000001998	ENSMUSG00000001998	108011	Ap4e1	adaptor-related protein complex AP-4, epsilon 1	0.26595	0.852005	0.520224	0.474516	0.787828
ENSMUSG00000019518	ENSMUSG00000019518	11781	Ap4m1	adaptor-related protein complex AP-4, mu 1	-0.116736	2.99156	0.354918	0.554359	0.829457
ENSMUSG00000020955	ENSMUSG00000020955	11782	Ap4s1	adaptor-related protein complex AP-4, sigma 1	0.0902828	3.59653	0.278561	0.600266	0.854766
ENSMUSG00000036291	ENSMUSG00000036291	74385	Ap5m1	adaptor-related protein complex 5, mu 1 subunit	0.057375	3.38826	0.105004	0.747423	0.917508
ENSMUSG00000068264	ENSMUSG00000068264	69596	Ap5s1	adaptor-related protein 5 complex, sigma 1 subunit	-0.159297	4.348	1.17282	0.284653	0.648323
ENSMUSG00000039623	ENSMUSG00000039623	231855	Ap5z1	adaptor-related protein complex 5, zeta 1 subunit	0.164951	2.95531	0.557431	0.459221	0.78006
ENSMUSG00000019979	ENSMUSG00000019979	11783	Apaf1	apoptotic peptidase activating factor 1	-0.821631	1.30794	5.25858	0.0266157	0.236119
ENSMUSG00000004931	ENSMUSG00000004931	57267	Apba3	amyloid beta (A4) precursor protein-binding, family A, member 3	-0.232777	4.56523	0.201607	0.65613	0.880595
ENSMUSG00000026786	ENSMUSG00000026786	54519	Apbb1ip	amyloid beta (A4) precursor protein-binding, family B, member 1 interacting protein	-0.494531	2.91421	1.84639	0.181551	0.552509
ENSMUSG00000029207	ENSMUSG00000029207	11787	Apbb2	amyloid beta (A4) precursor protein-binding, family B, member 2	0.119053	4.21747	1.02403	0.317032	0.673982
ENSMUSG00000117679	ENSMUSG00000117679	225372	Apbb3	amyloid beta (A4) precursor protein-binding, family B, member 3	-0.303186	3.21557	1.80222	0.186248	0.556284
ENSMUSG00000005871	ENSMUSG00000005871	11789	Apc	APC, WNT signaling pathway regulator	0.107059	4.69	0.566783	0.455502	0.777766
ENSMUSG00000026542	ENSMUSG00000026542	20219	Apcs	serum amyloid P-component	-0.478504	5.95642	7.63051	0.00831022	0.137368
ENSMUSG00000032590	ENSMUSG00000032590	235606	Apeh	acylpeptide hydrolase	-0.132864	5.02639	0.91455	0.344074	0.694732
ENSMUSG00000035960	ENSMUSG00000035960	11792	Apex1	apurinic/apyrimidinic endonuclease 1	-0.483874	4.11874	5.88129	0.0194234	0.203322
ENSMUSG00000025269	ENSMUSG00000025269	77622	Apex2	apurinic/apyrimidinic endonuclease 2	0.0065763	2.04286	0.000561076	0.981208	0.994838
ENSMUSG00000015750	ENSMUSG00000015750	226548	Aph1a	aph1 homolog A, gamma secretase subunit	0.248632	5.61365	2.83025	0.0995049	0.433551
ENSMUSG00000032375	ENSMUSG00000032375	208117	Aph1b	aph1 homolog B, gamma secretase subunit	0.0678737	1.51895	0.0442916	0.834272	0.947291
ENSMUSG00000027193	ENSMUSG00000027193	11800	Api5	apoptosis inhibitor 5	-0.144036	5.87242	0.384121	0.538908	0.819562
ENSMUSG00000010911	ENSMUSG00000010911	56369	Apip	APAF1 interacting protein	-0.429726	3.83843	5.98724	0.0184231	0.197771
ENSMUSG00000030051	ENSMUSG00000030051	72103	Aplf	aprataxin and PNKP like factor	0.0388453	1.47558	0.015609	0.901137	0.970507
ENSMUSG00000031996	ENSMUSG00000031996	11804	Aplp2	amyloid beta (A4) precursor-like protein 2	-0.321058	7.95797	3.45835	0.0696158	0.365789
ENSMUSG00000033096	ENSMUSG00000033096	71881	Apmap	adipocyte plasma membrane associated protein	-0.333308	4.62717	3.40053	0.0718355	0.371074
ENSMUSG00000032083	ENSMUSG00000032083	11806	Apoa1	apolipoprotein A-I	0.352732	12.4596	5.7856	0.0203769	0.207648
ENSMUSG00000005681	ENSMUSG00000005681	11807	Apoa2	apolipoprotein A-II	0.171673	12.6432	0.990166	0.325079	0.678598
ENSMUSG00000032080	ENSMUSG00000032080	11808	Apoa4	apolipoprotein A-IV	-2.68094	9.94436	35.9483	6.94473e-07	0.000548277
ENSMUSG00000032079	ENSMUSG00000032079	66113	Apoa5	apolipoprotein A-V	-0.143439	9.67181	1.48443	0.229499	0.59661
ENSMUSG00000020609	ENSMUSG00000020609	238055	Apob	apolipoprotein B	0.413866	8.99911	2.45617	0.125247	0.478089
ENSMUSG00000040613	ENSMUSG00000040613	11810	Apobec1	apolipoprotein B mRNA editing enzyme, catalytic polypeptide 1	-0.000914666	2.7095	1.5597e-05	0.996867	0.9996
ENSMUSG00000009585	ENSMUSG00000009585	80287	Apobec3	apolipoprotein B mRNA editing enzyme, catalytic polypeptide 3	0.184934	2.49952	0.253047	0.617482	0.86284
ENSMUSG00000040564	ENSMUSG00000040564	11812	Apoc1	apolipoprotein C-I	0.203803	12.1926	1.94629	0.169907	0.539501
ENSMUSG00000032081	ENSMUSG00000032081	11814	Apoc3	apolipoprotein C-III	0.168382	11.0644	1.69637	0.199459	0.570695
ENSMUSG00000074336	ENSMUSG00000074336	11425	Apoc4	apolipoprotein C-IV	0.297438	10.2384	5.2921	0.0261632	0.234228
ENSMUSG00000002985	ENSMUSG00000002985	11816	Apoe	apolipoprotein E	0.0597845	14.7145	0.229094	0.634538	0.868788
ENSMUSG00000047631	ENSMUSG00000047631	103161	Apof	apolipoprotein F	0.0645472	9.33657	0.271261	0.605067	0.857334
ENSMUSG00000000049	ENSMUSG00000000049	11818	Apoh	apolipoprotein H	0.28543	10.5727	5.37121	0.0251274	0.23084
ENSMUSG00000010601	ENSMUSG00000010601	75761	Apol7a	apolipoprotein L 7a	0.0650546	6.8163	0.135071	0.71501	0.908298
ENSMUSG00000057346	ENSMUSG00000057346	223672	Apol9a	apolipoprotein L 9a	0.113151	5.44083	0.16374	0.687984	0.895021
ENSMUSG00000068246	ENSMUSG00000068246	71898	Apol9b	apolipoprotein L 9b	0.129212	5.72396	0.227878	0.635809	0.870061
ENSMUSG00000090698	ENSMUSG00000090698	381823	Apold1	apolipoprotein L domain containing 1	0.0152549	0.938331	0.00134985	0.970856	0.991966
ENSMUSG00000024391	ENSMUSG00000024391	55938	Apom	apolipoprotein M	0.715571	7.1256	12.4023	0.00105746	0.0460577
ENSMUSG00000051716	ENSMUSG00000051716	28194	Apon	apolipoprotein N	0.0460517	7.83227	0.118712	0.732058	0.912894
ENSMUSG00000079508	ENSMUSG00000079508	68316	Apoo	apolipoprotein O	-0.130124	5.16711	0.745345	0.392581	0.733813
ENSMUSG00000025525	ENSMUSG00000025525	68117	Apool	apolipoprotein O-like	-0.183999	4.16431	1.35944	0.249842	0.615175
ENSMUSG00000037787	ENSMUSG00000037787	68020	Apopt1	apoptogenic, mitochondrial 1	0.0701553	3.12813	0.141367	0.708712	0.905706
ENSMUSG00000022892	ENSMUSG00000022892	11820	App	amyloid beta (A4) precursor protein	-0.433142	5.57063	4.4905	0.0399929	0.285988
ENSMUSG00000018481	ENSMUSG00000018481	66884	Appbp2	amyloid beta precursor protein (cytoplasmic tail) binding protein 2	0.0144821	4.37719	0.0113427	0.915662	0.976174
ENSMUSG00000040760	ENSMUSG00000040760	72993	Appl1	adaptor protein, phosphotyrosine interaction, PH domain and leucine zipper containing 1	-0.0688152	4.5367	0.194811	0.661079	0.882833
ENSMUSG00000020263	ENSMUSG00000020263	216190	Appl2	adaptor protein, phosphotyrosine interaction, PH domain and leucine zipper containing 2	0.00339479	3.98484	0.000613228	0.980354	0.994816
ENSMUSG00000006589	ENSMUSG00000006589	11821	Aprt	adenine phosphoribosyl transferase	0.0180622	5.15883	0.00595909	0.938845	0.983004
ENSMUSG00000028411	ENSMUSG00000028411	66408	Aptx	aprataxin	0.0691779	3.19305	0.104275	0.74827	0.917508
ENSMUSG00000004655	ENSMUSG00000004655	11826	Aqp1	aquaporin 1	0.238358	6.06427	2.66313	0.109752	0.45322
ENSMUSG00000042797	ENSMUSG00000042797	66333	Aqp11	aquaporin 11	0.0546097	5.66813	0.137056	0.712981	0.907411
ENSMUSG00000024411	ENSMUSG00000024411	11829	Aqp4	aquaporin 4	-0.462094	2.7813	3.51051	0.0675526	0.360097
ENSMUSG00000030762	ENSMUSG00000030762	11833	Aqp8	aquaporin 8	-0.659378	7.9492	5.83519	0.0206218	0.208847
ENSMUSG00000032204	ENSMUSG00000032204	64008	Aqp9	aquaporin 9	0.0878782	7.81265	0.448885	0.506325	0.802707
ENSMUSG00000040383	ENSMUSG00000040383	11834	Aqr	aquarius	0.1064	4.26016	0.462348	0.500048	0.801093
ENSMUSG00000046532	ENSMUSG00000046532	11835	Ar	androgen receptor	0.000277224	4.84395	2.60823e-06	0.998719	0.999861
ENSMUSG00000001127	ENSMUSG00000001127	11836	Araf	Araf proto-oncogene, serine/threonine kinase	0.0179467	5.21373	0.0158282	0.900449	0.970507
ENSMUSG00000032812	ENSMUSG00000032812	69710	Arap1	ArfGAP with RhoGAP domain, ankyrin repeat and PH domain 1	0.207551	4.59972	1.99105	0.16518	0.533084
ENSMUSG00000037999	ENSMUSG00000037999	212285	Arap2	ArfGAP with RhoGAP domain, ankyrin repeat and PH domain 2	-0.0564424	5.26982	0.183171	0.670725	0.887675
ENSMUSG00000024451	ENSMUSG00000024451	106952	Arap3	ArfGAP with RhoGAP domain, ankyrin repeat and PH domain 3	0.0781602	2.9482	0.149296	0.701049	0.901851
ENSMUSG00000032096	ENSMUSG00000032096	213827	Arcn1	archain 1	-0.0980652	5.11012	0.332737	0.566957	0.836329
ENSMUSG00000042350	ENSMUSG00000042350	68497	Arel1	apoptosis resistant E3 ubiquitin protein ligase 1	-0.0272169	4.82113	0.0434158	0.835895	0.947361
ENSMUSG00000048076	ENSMUSG00000048076	11840	Arf1	ADP-ribosylation factor 1	-0.221184	7.63578	3.29999	0.0760152	0.3826
ENSMUSG00000062421	ENSMUSG00000062421	11841	Arf2	ADP-ribosylation factor 2	-0.254705	2.62966	1.46827	0.23201	0.59844
ENSMUSG00000051853	ENSMUSG00000051853	11842	Arf3	ADP-ribosylation factor 3	-0.216388	5.05905	2.0779	0.156442	0.519411
ENSMUSG00000021877	ENSMUSG00000021877	11843	Arf4	ADP-ribosylation factor 4	-0.336405	6.53788	1.05516	0.311022	0.669248
ENSMUSG00000020440	ENSMUSG00000020440	11844	Arf5	ADP-ribosylation factor 5	0.533696	6.05362	4.2637	0.0457062	0.304547
ENSMUSG00000044147	ENSMUSG00000044147	11845	Arf6	ADP-ribosylation factor 6	-0.297453	5.45574	5.22759	0.0270418	0.237355
ENSMUSG00000027575	ENSMUSG00000027575	228998	Arfgap1	ADP-ribosylation factor GTPase activating protein 1	0.38271	4.42776	4.89856	0.0320477	0.260473
ENSMUSG00000027255	ENSMUSG00000027255	77038	Arfgap2	ADP-ribosylation factor GTPase activating protein 2	-0.00279725	6.37634	0.00056767	0.981098	0.994838
ENSMUSG00000054277	ENSMUSG00000054277	66251	Arfgap3	ADP-ribosylation factor GTPase activating protein 3	-0.536222	2.26045	2.57564	0.11559	0.46233
ENSMUSG00000067851	ENSMUSG00000067851	211673	Arfgef1	ADP-ribosylation factor guanine nucleotide-exchange factor 1(brefeldin A-inhibited)	-0.0374169	5.46141	0.0797254	0.778978	0.929644
ENSMUSG00000074582	ENSMUSG00000074582	99371	Arfgef2	ADP-ribosylation factor guanine nucleotide-exchange factor 2 (brefeldin A-inhibited)	-0.0959529	4.38125	0.465354	0.498666	0.800757
ENSMUSG00000074513	ENSMUSG00000074513	99889	Arfip1	ADP-ribosylation factor interacting protein 1	-0.0704893	4.05205	0.208411	0.650235	0.878044
ENSMUSG00000030881	ENSMUSG00000030881	76932	Arfip2	ADP-ribosylation factor interacting protein 2	0.335778	2.91521	3.30428	0.0758317	0.38227
ENSMUSG00000038671	ENSMUSG00000038671	76688	Arfrp1	ADP-ribosylation factor related protein 1	0.0204852	4.07394	0.0153737	0.901881	0.970805
ENSMUSG00000019987	ENSMUSG00000019987	11846	Arg1	arginase, liver	0.18874	9.82491	2.94852	0.0929053	0.423445
ENSMUSG00000040459	ENSMUSG00000040459	234023	Arglu1	arginine and glutamate rich 1	0.179092	6.15504	2.46945	0.123158	0.47383
ENSMUSG00000027247	ENSMUSG00000027247	228359	Arhgap1	Rho GTPase activating protein 1	-0.12521	3.2094	0.385376	0.537905	0.819562
ENSMUSG00000037148	ENSMUSG00000037148	78514	Arhgap10	Rho GTPase activating protein 10	-0.311279	2.54271	0.914325	0.344132	0.694732
ENSMUSG00000041225	ENSMUSG00000041225	75415	Arhgap12	Rho GTPase activating protein 12	0.11667	4.28798	0.686769	0.411686	0.746445
ENSMUSG00000049744	ENSMUSG00000049744	76117	Arhgap15	Rho GTPase activating protein 15	0.29272	1.27986	0.477176	0.49329	0.79811
ENSMUSG00000030766	ENSMUSG00000030766	70497	Arhgap17	Rho GTPase activating protein 17	-0.221691	2.97446	1.02477	0.31686	0.673982
ENSMUSG00000039031	ENSMUSG00000039031	73910	Arhgap18	Rho GTPase activating protein 18	-0.222339	3.95168	1.82802	0.18319	0.554048
ENSMUSG00000036591	ENSMUSG00000036591	71435	Arhgap21	Rho GTPase activating protein 21	0.0113233	4.15282	0.0046312	0.946048	0.984312
ENSMUSG00000049807	ENSMUSG00000049807	58996	Arhgap23	Rho GTPase activating protein 23	-0.0205964	3.78498	0.017955	0.894009	0.968719
ENSMUSG00000057315	ENSMUSG00000057315	231532	Arhgap24	Rho GTPase activating protein 24	0.121596	2.48148	0.240916	0.625955	0.866214
ENSMUSG00000030047	ENSMUSG00000030047	232201	Arhgap25	Rho GTPase activating protein 25	-0.803984	1.2734	2.51328	0.119968	0.468367
ENSMUSG00000036452	ENSMUSG00000036452	71302	Arhgap26	Rho GTPase activating protein 26	0.4369	3.80253	4.26091	0.0448544	0.301863
ENSMUSG00000039831	ENSMUSG00000039831	214137	Arhgap29	Rho GTPase activating protein 29	0.517511	5.69882	11.2106	0.00166229	0.0592824
ENSMUSG00000048865	ENSMUSG00000048865	226652	Arhgap30	Rho GTPase activating protein 30	-0.355837	2.45404	1.5159	0.224705	0.592658
ENSMUSG00000022799	ENSMUSG00000022799	12549	Arhgap31	Rho GTPase activating protein 31	-0.423266	2.78719	3.98592	0.0520183	0.321896
ENSMUSG00000041444	ENSMUSG00000041444	330914	Arhgap32	Rho GTPase activating protein 32	0.70263	2.80656	10.4179	0.00234403	0.0708543
ENSMUSG00000058230	ENSMUSG00000058230	232906	Arhgap35	Rho GTPase activating protein 35	0.0492517	5.03638	0.100775	0.752386	0.918282
ENSMUSG00000033697	ENSMUSG00000033697	223666	Arhgap39	Rho GTPase activating protein 39	0.496471	1.58691	2.25747	0.140031	0.497153
ENSMUSG00000031389	ENSMUSG00000031389	171207	Arhgap4	Rho GTPase activating protein 4	-0.303401	1.47937	0.900168	0.347858	0.698116
ENSMUSG00000050730	ENSMUSG00000050730	71544	Arhgap42	Rho GTPase activating protein 42	0.356408	5.46658	4.73225	0.0349521	0.269813
ENSMUSG00000035697	ENSMUSG00000035697	70719	Arhgap45	Rho GTPase activating protein 45	-0.125849	2.64263	0.206864	0.651446	0.878796
ENSMUSG00000035133	ENSMUSG00000035133	11855	Arhgap5	Rho GTPase activating protein 5	0.372057	6.53569	14.4764	0.00042986	0.0265846
ENSMUSG00000031355	ENSMUSG00000031355	11856	Arhgap6	Rho GTPase activating protein 6	0.413087	3.33773	3.57789	0.0650685	0.354371
ENSMUSG00000040345	ENSMUSG00000040345	216445	Arhgap9	Rho GTPase activating protein 9	-0.461237	1.41351	1.40872	0.241562	0.607206
ENSMUSG00000025132	ENSMUSG00000025132	192662	Arhgdia	Rho GDP dissociation inhibitor (GDI) alpha	-0.319142	4.47776	2.54853	0.11747	0.465355
ENSMUSG00000030220	ENSMUSG00000030220	11857	Arhgdib	Rho, GDP dissociation inhibitor (GDI) beta	-0.445716	3.34332	4.79992	0.0337373	0.263841
ENSMUSG00000040940	ENSMUSG00000040940	16801	Arhgef1	Rho guanine nucleotide exchange factor (GEF) 1	0.0460817	4.13103	0.130307	0.719821	0.909171
ENSMUSG00000071176	ENSMUSG00000071176	234094	Arhgef10	Rho guanine nucleotide exchange factor (GEF) 10	-0.290843	0.947348	0.568932	0.454654	0.777394
ENSMUSG00000040964	ENSMUSG00000040964	72754	Arhgef10l	Rho guanine nucleotide exchange factor (GEF) 10-like	0.0669491	3.13619	0.0390648	0.844288	0.95027
ENSMUSG00000041977	ENSMUSG00000041977	213498	Arhgef11	Rho guanine nucleotide exchange factor (GEF) 11	0.447252	2.1572	3.44236	0.0701721	0.366952
ENSMUSG00000059495	ENSMUSG00000059495	69632	Arhgef12	Rho guanine nucleotide exchange factor (GEF) 12	0.251766	6.86872	3.52565	0.0669853	0.359299
ENSMUSG00000052921	ENSMUSG00000052921	442801	Arhgef15	Rho guanine nucleotide exchange factor (GEF) 15	-0.332514	2.30457	1.6162	0.210224	0.580133
ENSMUSG00000029032	ENSMUSG00000029032	230972	Arhgef16	Rho guanine nucleotide exchange factor (GEF) 16	-1.0295	1.42336	6.01552	0.0181657	0.197554
ENSMUSG00000032875	ENSMUSG00000032875	207212	Arhgef17	Rho guanine nucleotide exchange factor (GEF) 17	-0.0268721	1.59001	0.00472689	0.945495	0.984188
ENSMUSG00000004568	ENSMUSG00000004568	102098	Arhgef18	rho/rac guanine nucleotide exchange factor (GEF) 18	-0.179234	4.19086	1.60503	0.211779	0.58092
ENSMUSG00000028919	ENSMUSG00000028919	213649	Arhgef19	Rho guanine nucleotide exchange factor (GEF) 19	0.281256	4.70835	4.55051	0.0384562	0.280763
ENSMUSG00000028059	ENSMUSG00000028059	16800	Arhgef2	rho/rac guanine nucleotide exchange factor (GEF) 2	-0.871108	2.71917	8.19075	0.00639344	0.119052
ENSMUSG00000036885	ENSMUSG00000036885	622434	Arhgef26	Rho guanine nucleotide exchange factor (GEF) 26	0.561664	4.55305	8.55274	0.00540908	0.109825
ENSMUSG00000021895	ENSMUSG00000021895	71704	Arhgef3	Rho guanine nucleotide exchange factor (GEF) 3	-0.0548093	4.09222	0.137676	0.712362	0.90676
ENSMUSG00000045094	ENSMUSG00000045094	328967	Arhgef37	Rho guanine nucleotide exchange factor (GEF) 37	0.415867	2.0124	2.65567	0.110236	0.453449
ENSMUSG00000004562	ENSMUSG00000004562	268739	Arhgef40	Rho guanine nucleotide exchange factor (GEF) 40	-0.324802	2.76342	1.76105	0.191258	0.560799
ENSMUSG00000033542	ENSMUSG00000033542	54324	Arhgef5	Rho guanine nucleotide exchange factor (GEF) 5	-0.36781	4.47419	4.82792	0.0332482	0.262497
ENSMUSG00000031133	ENSMUSG00000031133	73341	Arhgef6	Rac/Cdc42 guanine nucleotide exchange factor (GEF) 6	0.0416953	1.74645	0.0137563	0.90716	0.972623
ENSMUSG00000031511	ENSMUSG00000031511	54126	Arhgef7	Rho guanine nucleotide exchange factor (GEF7)	-0.0812686	4.63145	0.385342	0.537923	0.819562
ENSMUSG00000025656	ENSMUSG00000025656	236915	Arhgef9	CDC42 guanine nucleotide exchange factor (GEF) 9	-0.404629	2.86534	2.59714	0.114124	0.460474
ENSMUSG00000007880	ENSMUSG00000007880	93760	Arid1a	AT rich interactive domain 1A (SWI-like)	0.289173	5.52165	2.70412	0.107132	0.448754
ENSMUSG00000069729	ENSMUSG00000069729	239985	Arid1b	AT rich interactive domain 1B (SWI-like)	0.114685	4.86891	0.847323	0.362271	0.710479
ENSMUSG00000033237	ENSMUSG00000033237	77044	Arid2	AT rich interactive domain 2 (ARID, RFX-like)	-0.0310017	4.3012	0.0338905	0.854776	0.954829
ENSMUSG00000019564	ENSMUSG00000019564	13496	Arid3a	AT rich interactive domain 3A (BRIGHT-like)	-0.268509	1.26989	0.340314	0.562592	0.833249
ENSMUSG00000004661	ENSMUSG00000004661	56380	Arid3b	AT rich interactive domain 3B (BRIGHT-like)	0.279816	2.28242	1.02997	0.315649	0.672481
ENSMUSG00000048118	ENSMUSG00000048118	238247	Arid4a	AT rich interactive domain 4A (RBP1-like)	0.331966	5.64295	4.86961	0.0325338	0.261694
ENSMUSG00000039219	ENSMUSG00000039219	94246	Arid4b	AT rich interactive domain 4B (RBP1-like)	0.287339	5.76151	4.86542	0.0326048	0.261694
ENSMUSG00000019947	ENSMUSG00000019947	71371	Arid5b	AT rich interactive domain 5B (MRF1-like)	0.714002	6.25236	4.8336	0.0342708	0.266465
ENSMUSG00000025234	ENSMUSG00000025234	23806	Arih1	ariadne RBR E3 ubiquitin protein ligase 1	0.0598558	5.58727	0.200279	0.656666	0.880783
ENSMUSG00000064145	ENSMUSG00000064145	23807	Arih2	ariadne RBR E3 ubiquitin protein ligase 2	0.00625874	5.11316	0.00199079	0.964611	0.990367
ENSMUSG00000060904	ENSMUSG00000060904	104303	Arl1	ADP-ribosylation factor-like 1	0.0161998	5.86625	0.0149491	0.903238	0.971172
ENSMUSG00000022911	ENSMUSG00000022911	68146	Arl13b	ADP-ribosylation factor-like 13B	0.334619	2.75201	2.72799	0.105639	0.445974
ENSMUSG00000027122	ENSMUSG00000027122	212772	Arl14ep	ADP-ribosylation factor-like 14 effector protein	0.0923737	2.81558	0.185851	0.668472	0.886392
ENSMUSG00000042348	ENSMUSG00000042348	218639	Arl15	ADP-ribosylation factor-like 15	0.0691581	2.50045	0.0761849	0.783813	0.931287
ENSMUSG00000057594	ENSMUSG00000057594	70317	Arl16	ADP-ribosylation factor-like 16	-0.0752604	2.52438	0.0968354	0.757113	0.920598
ENSMUSG00000024944	ENSMUSG00000024944	56327	Arl2	ADP-ribosylation factor-like 2	-0.270985	2.53194	1.24128	0.271202	0.636233
ENSMUSG00000031776	ENSMUSG00000031776	107566	Arl2bp	ADP-ribosylation factor-like 2 binding protein	-0.637137	2.97157	4.4057	0.0416117	0.291478
ENSMUSG00000025035	ENSMUSG00000025035	56350	Arl3	ADP-ribosylation factor-like 3	0.274849	3.84269	2.55741	0.11685	0.464853
ENSMUSG00000047446	ENSMUSG00000047446	11861	Arl4a	ADP-ribosylation factor-like 4A	-0.152943	5.38672	1.01106	0.320081	0.676148
ENSMUSG00000049866	ENSMUSG00000049866	320982	Arl4c	ADP-ribosylation factor-like 4C	-0.187254	1.78172	0.323784	0.572202	0.84007
ENSMUSG00000034936	ENSMUSG00000034936	80981	Arl4d	ADP-ribosylation factor-like 4D	0.014456	2.11185	0.00155173	0.968754	0.991324
ENSMUSG00000036093	ENSMUSG00000036093	75423	Arl5a	ADP-ribosylation factor-like 5A	0.123474	6.82732	2.06812	0.157398	0.520358
ENSMUSG00000017418	ENSMUSG00000017418	75869	Arl5b	ADP-ribosylation factor-like 5B	0.620047	4.0789	13.8745	0.000547636	0.0312552
ENSMUSG00000030654	ENSMUSG00000030654	54208	Arl6ip1	ADP-ribosylation factor-like 6 interacting protein 1	-0.035551	8.52543	0.16662	0.68509	0.893715
ENSMUSG00000029404	ENSMUSG00000029404	65105	Arl6ip4	ADP-ribosylation factor-like 6 interacting protein 4	0.0737842	5.17376	0.26844	0.606945	0.857973
ENSMUSG00000035199	ENSMUSG00000035199	65106	Arl6ip5	ADP-ribosylation factor-like 6 interacting protein 5	0.264195	1.61139	0.322397	0.573023	0.840453
ENSMUSG00000026960	ENSMUSG00000026960	65103	Arl6ip6	ADP-ribosylation factor-like 6 interacting protein 6	0.585847	2.60243	6.47349	0.0144906	0.182016
ENSMUSG00000026426	ENSMUSG00000026426	68724	Arl8a	ADP-ribosylation factor-like 8A	-0.899203	3.10889	16.7418	0.000177305	0.0160334
ENSMUSG00000030105	ENSMUSG00000030105	67166	Arl8b	ADP-ribosylation factor-like 8B	0.143406	5.21824	1.76388	0.190909	0.560692
ENSMUSG00000027599	ENSMUSG00000027599	74252	Armc1	armadillo repeat containing 1	0.0801435	6.39132	0.522754	0.47345	0.787828
ENSMUSG00000038525	ENSMUSG00000038525	67211	Armc10	armadillo repeat containing 10	-0.0452414	2.83974	0.0498167	0.824403	0.943834
ENSMUSG00000042178	ENSMUSG00000042178	233912	Armc5	armadillo repeat containing 5	0.124384	2.78139	0.258122	0.613921	0.860526
ENSMUSG00000002343	ENSMUSG00000002343	76813	Armc6	armadillo repeat containing 6	0.538668	1.65255	2.26099	0.139729	0.496944
ENSMUSG00000032468	ENSMUSG00000032468	74125	Armc8	armadillo repeat containing 8	-0.112934	3.94225	0.391194	0.534865	0.818268
ENSMUSG00000062590	ENSMUSG00000062590	78795	Armc9	armadillo repeat containing 9	-0.321371	2.04235	1.07333	0.305788	0.665841
ENSMUSG00000033436	ENSMUSG00000033436	67416	Armcx2	armadillo repeat containing, X-linked 2	-0.191903	1.97656	0.341455	0.56194	0.833249
ENSMUSG00000049047	ENSMUSG00000049047	71703	Armcx3	armadillo repeat containing, X-linked 3	-0.476392	2.87676	3.65709	0.0622771	0.347766
ENSMUSG00000072969	ENSMUSG00000072969	494468	Armcx5	armadillo repeat containing, X-linked 5	-0.0914425	1.97496	0.0869034	0.769521	0.925166
ENSMUSG00000039901	ENSMUSG00000039901	71617	Armh3	armadillo-like helical domain containing 3	0.097308	2.83854	0.247298	0.621431	0.864191
ENSMUSG00000061759	ENSMUSG00000061759	73419	Armt1	acidic residue methyltransferase 1	0.259256	3.38887	2.51287	0.119997	0.468367
ENSMUSG00000015522	ENSMUSG00000015522	11863	Arnt	aryl hydrocarbon receptor nuclear translocator	-0.0186854	4.04425	0.0110112	0.916899	0.976418
ENSMUSG00000055116	ENSMUSG00000055116	11865	Arntl	aryl hydrocarbon receptor nuclear translocator-like	0.266189	2.2165	0.189684	0.665656	0.884869
ENSMUSG00000029621	ENSMUSG00000029621	56443	Arpc1a	actin related protein 2/3 complex, subunit 1A	-0.645463	5.37153	10.3182	0.0024988	0.0730696
ENSMUSG00000029622	ENSMUSG00000029622	11867	Arpc1b	actin related protein 2/3 complex, subunit 1B	-0.280663	6.35574	2.58385	0.115114	0.461216
ENSMUSG00000006304	ENSMUSG00000006304	76709	Arpc2	actin related protein 2/3 complex, subunit 2	-0.0334628	7.61297	0.177741	0.67535	0.889806
ENSMUSG00000029465	ENSMUSG00000029465	56378	Arpc3	actin related protein 2/3 complex, subunit 3	0.0495109	5.21503	0.0973051	0.756544	0.920426
ENSMUSG00000079426	ENSMUSG00000079426	68089	Arpc4	actin related protein 2/3 complex, subunit 4	0.292012	5.15862	1.63867	0.207662	0.578476
ENSMUSG00000008475	ENSMUSG00000008475	67771	Arpc5	actin related protein 2/3 complex, subunit 5	-0.257615	6.21631	4.84715	0.0329166	0.261694
ENSMUSG00000026755	ENSMUSG00000026755	74192	Arpc5l	actin related protein 2/3 complex, subunit 5-like	-0.0836048	5.81189	0.429951	0.515387	0.807055
ENSMUSG00000039043	ENSMUSG00000039043	70420	Arpin	actin-related protein 2/3 complex inhibitor	-0.353381	1.85799	1.22441	0.27444	0.638756
ENSMUSG00000007656	ENSMUSG00000007656	59046	Arpp19	cAMP-regulated phosphoprotein 19	-0.259436	6.74781	4.9686	0.0309036	0.255418
ENSMUSG00000018909	ENSMUSG00000018909	109689	Arrb1	arrestin, beta 1	-0.0954113	3.49822	0.252606	0.617723	0.86284
ENSMUSG00000060216	ENSMUSG00000060216	216869	Arrb2	arrestin, beta 2	-0.0725123	4.53183	0.259441	0.613019	0.86028
ENSMUSG00000026972	ENSMUSG00000026972	215705	Arrdc1	arrestin domain containing 1	-0.597186	1.54249	2.86747	0.0973728	0.430264
ENSMUSG00000002910	ENSMUSG00000002910	70807	Arrdc2	arrestin domain containing 2	-0.275218	2.13814	0.91927	0.342844	0.693585
ENSMUSG00000074794	ENSMUSG00000074794	105171	Arrdc3	arrestin domain containing 3	0.155135	7.00502	0.26713	0.608327	0.858742
ENSMUSG00000042659	ENSMUSG00000042659	66412	Arrdc4	arrestin domain containing 4	-0.17149	2.63869	0.501816	0.482396	0.792891
ENSMUSG00000022620	ENSMUSG00000022620	11883	Arsa	arylsulfatase A	-0.157831	4.96366	0.650163	0.424396	0.756505
ENSMUSG00000042082	ENSMUSG00000042082	11881	Arsb	arylsulfatase B	-0.106413	3.49395	0.204357	0.653421	0.878997
ENSMUSG00000020604	ENSMUSG00000020604	74008	Arsg	arylsulfatase G	-0.720498	4.17604	8.65802	0.00525646	0.108154
ENSMUSG00000021592	ENSMUSG00000021592	77041	Arsk	arylsulfatase K	0.243882	3.07625	1.84572	0.181125	0.552148
ENSMUSG00000030217	ENSMUSG00000030217	109978	Art4	ADP-ribosyltransferase 4	-0.124283	1.50289	0.073767	0.787184	0.932404
ENSMUSG00000000325	ENSMUSG00000000325	11877	Arvcf	armadillo repeat gene deleted in velocardiofacial syndrome	-0.746299	2.16686	6.1709	0.0168178	0.192069
ENSMUSG00000003559	ENSMUSG00000003559	57344	As3mt	arsenic (+3 oxidation state) methyltransferase	-0.456714	4.55222	4.07449	0.0498498	0.314813
ENSMUSG00000031591	ENSMUSG00000031591	11886	Asah1	N-acylsphingosine amidohydrolase 1	-0.0776033	3.20866	0.103982	0.748612	0.917508
ENSMUSG00000024887	ENSMUSG00000024887	54447	Asah2	N-acylsphingosine amidohydrolase 2	-0.415289	4.3848	6.91944	0.0116669	0.164115
ENSMUSG00000022377	ENSMUSG00000022377	13196	Asap1	ArfGAP with SH3 domain, ankyrin repeat and PH domain1	-0.0847827	4.93444	0.350084	0.557058	0.83153
ENSMUSG00000052632	ENSMUSG00000052632	211914	Asap2	ArfGAP with SH3 domain, ankyrin repeat and PH domain 2	0.192504	2.67496	0.388519	0.536259	0.818725
ENSMUSG00000036995	ENSMUSG00000036995	230837	Asap3	ArfGAP with SH3 domain, ankyrin repeat and PH domain 3	0.66942	1.22446	3.13894	0.0832868	0.402266
ENSMUSG00000026311	ENSMUSG00000026311	65247	Asb1	ankyrin repeat and SOCS box-containing 1	-0.218629	2.78521	1.2272	0.2739	0.638668
ENSMUSG00000033781	ENSMUSG00000033781	142688	Asb13	ankyrin repeat and SOCS box-containing 13	0.0804074	4.84163	0.445598	0.507878	0.803434
ENSMUSG00000021200	ENSMUSG00000021200	65256	Asb2	ankyrin repeat and SOCS box-containing 2	0.0696694	0.922562	0.0216601	0.883659	0.965963
ENSMUSG00000020305	ENSMUSG00000020305	65257	Asb3	ankyrin repeat and SOCS box-containing 3	0.122455	3.03598	0.236278	0.629291	0.867337
ENSMUSG00000039483	ENSMUSG00000039483	72323	Asb6	ankyrin repeat and SOCS box-containing 6	0.297623	1.84738	0.90847	0.345666	0.695144
ENSMUSG00000030509	ENSMUSG00000030509	117589	Asb7	ankyrin repeat and SOCS box-containing 7	0.230279	3.27019	2.16903	0.147849	0.509121
ENSMUSG00000048175	ENSMUSG00000048175	78541	Asb8	ankyrin repeat and SOCS box-containing 8	0.0862194	4.36045	0.298899	0.587303	0.84753
ENSMUSG00000044475	ENSMUSG00000044475	69090	Ascc1	activating signal cointegrator 1 complex subunit 1	-0.0151318	2.97635	0.00410875	0.949178	0.985632
ENSMUSG00000020412	ENSMUSG00000020412	75452	Ascc2	activating signal cointegrator 1 complex subunit 2	-0.037458	3.36492	0.0296692	0.864023	0.958327
ENSMUSG00000038774	ENSMUSG00000038774	77987	Ascc3	activating signal cointegrator 1 complex subunit 3	0.204426	4.1668	2.34619	0.132664	0.486073
ENSMUSG00000019857	ENSMUSG00000019857	66403	Asf1a	anti-silencing function 1A histone chaperone	0.198012	3.24012	1.26828	0.266123	0.62898
ENSMUSG00000020884	ENSMUSG00000020884	11889	Asgr1	asialoglycoprotein receptor 1	0.121028	9.52698	0.479714	0.492149	0.797472
ENSMUSG00000040963	ENSMUSG00000040963	11890	Asgr2	asialoglycoprotein receptor 2	0.292881	6.88154	6.34244	0.0154531	0.1858
ENSMUSG00000028053	ENSMUSG00000028053	192195	Ash1l	ASH1 like histone lysine methyltransferase	0.293998	6.17115	6.07289	0.017655	0.196063
ENSMUSG00000031575	ENSMUSG00000031575	23808	Ash2l	ASH2 like histone lysine methyltransferase complex subunit	-0.18838	3.91776	1.76803	0.190398	0.560046
ENSMUSG00000028008	ENSMUSG00000028008	58170	Asic5	acid-sensing (proton-gated) ion channel family member 5	0.475016	1.7891	2.17187	0.14759	0.508393
ENSMUSG00000025533	ENSMUSG00000025533	109900	Asl	argininosuccinate lyase	0.250339	6.95793	2.07934	0.156411	0.519411
ENSMUSG00000052456	ENSMUSG00000052456	56495	Asna1	arsA arsenite transporter, ATP-binding, homolog 1 (bacterial)	0.105969	3.80958	0.436392	0.512272	0.805206
ENSMUSG00000026095	ENSMUSG00000026095	70396	Asnsd1	asparagine synthetase domain containing 1	-0.232362	4.32217	2.49062	0.121605	0.47099
ENSMUSG00000020774	ENSMUSG00000020774	11484	Aspa	aspartoacylase	0.295998	3.10852	2.23538	0.141937	0.499924
ENSMUSG00000038704	ENSMUSG00000038704	68352	Aspdh	aspartate dehydrogenase domain containing	0.318486	6.42004	3.4492	0.0699569	0.36651
ENSMUSG00000037686	ENSMUSG00000037686	104816	Aspg	asparaginase	0.0999032	6.60787	0.447036	0.507197	0.80323
ENSMUSG00000028207	ENSMUSG00000028207	65973	Asph	aspartate-beta-hydroxylase	-0.0274743	4.5837	0.0546015	0.816312	0.940691
ENSMUSG00000025142	ENSMUSG00000025142	68938	Aspscr1	alveolar soft part sarcoma chromosome region, candidate 1 (human)	0.0420154	3.45448	0.0408945	0.840663	0.94922
ENSMUSG00000024654	ENSMUSG00000024654	66514	Asrgl1	asparaginase like 1	-0.0464897	2.91638	0.0577005	0.81127	0.939417
ENSMUSG00000076441	ENSMUSG00000076441	11898	Ass1	argininosuccinate synthetase 1	0.737522	9.23107	13.0116	0.000814891	0.0386138
ENSMUSG00000032567	ENSMUSG00000032567	66595	Aste1	asteroid homolog 1	0.0284992	2.34316	0.0162194	0.899232	0.970478
ENSMUSG00000042548	ENSMUSG00000042548	228790	Asxl1	additional sex combs like 1	0.0363269	4.00371	0.0779593	0.781375	0.930748
ENSMUSG00000037486	ENSMUSG00000037486	75302	Asxl2	additional sex combs like 2, transcriptional regulator	0.0208045	4.84	0.0312617	0.86046	0.956946
ENSMUSG00000013662	ENSMUSG00000013662	67979	Atad1	ATPase family, AAA domain containing 1	0.0144988	5.37673	0.00704633	0.933478	0.981759
ENSMUSG00000022360	ENSMUSG00000022360	70472	Atad2	ATPase family, AAA domain containing 2	-0.644413	2.03323	3.80315	0.0574689	0.337936
ENSMUSG00000052812	ENSMUSG00000052812	320817	Atad2b	ATPase family, AAA domain containing 2B	0.287835	4.99777	5.4285	0.0244051	0.227438
ENSMUSG00000029036	ENSMUSG00000029036	108888	Atad3a	ATPase family, AAA domain containing 3A	-0.0264038	4.94909	0.026979	0.870275	0.961108
ENSMUSG00000054514	ENSMUSG00000054514	70448	Atad3aos	ATPase family, AAA domain containing 3A, opposite strand	-0.010105	1.10912	0.000772581	0.97795	0.994116
ENSMUSG00000017550	ENSMUSG00000017550	237877	Atad5	ATPase family, AAA domain containing 5	-0.660412	1.42438	2.5635	0.116428	0.463664
ENSMUSG00000024426	ENSMUSG00000024426	73242	Atat1	alpha tubulin acetyltransferase 1	0.505863	3.80554	6.88841	0.011843	0.165509
ENSMUSG00000030850	ENSMUSG00000030850	11907	Ate1	arginyltransferase 1	0.0644244	4.95564	0.290628	0.592504	0.850761
ENSMUSG00000023027	ENSMUSG00000023027	11908	Atf1	activating transcription factor 1	0.193868	4.15925	1.49149	0.228412	0.596375
ENSMUSG00000027104	ENSMUSG00000027104	11909	Atf2	activating transcription factor 2	0.0548784	4.46327	0.103616	0.74904	0.917508
ENSMUSG00000026628	ENSMUSG00000026628	11910	Atf3	activating transcription factor 3	-1.55387	1.62975	11.4171	0.00152154	0.0574501
ENSMUSG00000042406	ENSMUSG00000042406	11911	Atf4	activating transcription factor 4	0.203069	6.22896	1.46744	0.23214	0.59844
ENSMUSG00000038539	ENSMUSG00000038539	107503	Atf5	activating transcription factor 5	0.274349	7.70583	1.45788	0.234358	0.600173
ENSMUSG00000026663	ENSMUSG00000026663	226641	Atf6	activating transcription factor 6	0.0667814	5.28495	0.319059	0.575008	0.841745
ENSMUSG00000015461	ENSMUSG00000015461	12915	Atf6b	activating transcription factor 6 beta	0.0297929	4.02814	0.0203473	0.887215	0.966258
ENSMUSG00000099083	ENSMUSG00000099083	223922	Atf7	activating transcription factor 7	0.479757	3.50068	6.46281	0.0145666	0.182269
ENSMUSG00000030213	ENSMUSG00000030213	54343	Atf7ip	activating transcription factor 7 interacting protein	0.249905	4.8424	4.19846	0.0463813	0.306502
ENSMUSG00000021619	ENSMUSG00000021619	66795	Atg10	autophagy related 10	-0.459469	2.91849	4.90785	0.0318933	0.260003
ENSMUSG00000037204	ENSMUSG00000037204	68118	Atg101	autophagy related 101	0.205868	5.42152	2.28837	0.137412	0.493647
ENSMUSG00000032905	ENSMUSG00000032905	67526	Atg12	autophagy related 12	-0.0269543	4.8303	0.0507644	0.822769	0.943686
ENSMUSG00000027244	ENSMUSG00000027244	51897	Atg13	autophagy related 13	0.25263	4.26836	2.97711	0.0913847	0.420612
ENSMUSG00000037526	ENSMUSG00000037526	100504663	Atg14	autophagy related 14	0.246746	4.11459	2.26572	0.139326	0.496607
ENSMUSG00000026289	ENSMUSG00000026289	77040	Atg16l1	autophagy related 16-like 1 (S. cerevisiae)	0.133369	4.17148	0.633969	0.430128	0.761659
ENSMUSG00000047767	ENSMUSG00000047767	73683	Atg16l2	autophagy related 16-like 2 (S. cerevisiae)	-0.331821	3.55399	1.6543	0.205108	0.576887
ENSMUSG00000024773	ENSMUSG00000024773	329015	Atg2a	autophagy related 2A	0.2433	4.80324	3.25226	0.0780938	0.388614
ENSMUSG00000041341	ENSMUSG00000041341	76559	Atg2b	autophagy related 2B	0.025327	3.74262	0.0101845	0.92008	0.977801
ENSMUSG00000022663	ENSMUSG00000022663	67841	Atg3	autophagy related 3	-0.000342715	5.67107	3.50692e-06	0.998514	0.999861
ENSMUSG00000079418	ENSMUSG00000079418	666468	Atg4a	autophagy related 4A, cysteine peptidase	0.145672	3.00797	0.440502	0.510302	0.804242
ENSMUSG00000026280	ENSMUSG00000026280	66615	Atg4b	autophagy related 4B, cysteine peptidase	0.0606964	4.3256	0.180453	0.67303	0.888757
ENSMUSG00000028550	ENSMUSG00000028550	242557	Atg4c	autophagy related 4C, cysteine peptidase	0.127943	2.79291	0.244003	0.623758	0.865403
ENSMUSG00000002820	ENSMUSG00000002820	235040	Atg4d	autophagy related 4D, cysteine peptidase	0.450706	3.70623	5.50538	0.0234705	0.222934
ENSMUSG00000038160	ENSMUSG00000038160	11793	Atg5	autophagy related 5	0.10374	6.18028	1.1249	0.294585	0.657294
ENSMUSG00000030314	ENSMUSG00000030314	74244	Atg7	autophagy related 7	-0.0339907	5.19019	0.0681634	0.795234	0.934054
ENSMUSG00000026192	ENSMUSG00000026192	108147	Atic	5-aminoimidazole-4-carboxamide ribonucleotide formyltransferase/IMP cyclohydrolase	0.136975	3.55621	0.635073	0.429729	0.761293
ENSMUSG00000059811	ENSMUSG00000059811	56298	Atl2	atlastin GTPase 2	0.00130636	5.79339	7.41491e-05	0.993168	0.998457
ENSMUSG00000024759	ENSMUSG00000024759	109168	Atl3	atlastin GTPase 3	-0.114489	5.56547	1.18073	0.283054	0.646339
ENSMUSG00000034218	ENSMUSG00000034218	11920	Atm	ataxia telangiectasia mutated	0.330495	3.82902	2.6969	0.107588	0.450139
ENSMUSG00000047388	ENSMUSG00000047388	234776	Atmin	ATM interactor	0.261162	2.793	1.62579	0.208899	0.578648
ENSMUSG00000004263	ENSMUSG00000004263	13498	Atn1	atrophin 1	0.334347	2.31723	1.47722	0.230616	0.597269
ENSMUSG00000037621	ENSMUSG00000037621	71093	Atoh8	atonal bHLH transcription factor 8	0.0755117	3.54996	0.141888	0.708201	0.905706
ENSMUSG00000018585	ENSMUSG00000018585	11927	Atox1	antioxidant 1 copper chaperone	-0.307247	7.24918	3.89755	0.0545793	0.32952
ENSMUSG00000046808	ENSMUSG00000046808	231287	Atp10d	ATPase, class V, type 10D	-0.0724405	1.09883	0.0330595	0.856547	0.955129
ENSMUSG00000031441	ENSMUSG00000031441	50770	Atp11a	ATPase, class VI, type 11A	0.538316	2.75281	4.19487	0.0464706	0.306604
ENSMUSG00000037400	ENSMUSG00000037400	76295	Atp11b	ATPase, class VI, type 11B	0.363346	4.36603	5.82553	0.019973	0.206032
ENSMUSG00000062949	ENSMUSG00000062949	320940	Atp11c	ATPase, class VI, type 11C	0.618397	6.75906	21.5499	3.05031e-05	0.00619328
ENSMUSG00000031862	ENSMUSG00000031862	170759	Atp13a1	ATPase type 13A1	0.225951	4.33218	2.56502	0.116322	0.463664
ENSMUSG00000036622	ENSMUSG00000036622	74772	Atp13a2	ATPase type 13A2	-0.190397	3.25347	0.884567	0.352028	0.701384
ENSMUSG00000022533	ENSMUSG00000022533	224088	Atp13a3	ATPase type 13A3	0.112648	5.91688	0.446174	0.507605	0.803403
ENSMUSG00000033161	ENSMUSG00000033161	11928	Atp1a1	ATPase, Na+/K+ transporting, alpha 1 polypeptide	0.0685299	8.54027	0.1262	0.72416	0.910467
ENSMUSG00000007097	ENSMUSG00000007097	98660	Atp1a2	ATPase, Na+/K+ transporting, alpha 2 polypeptide	0.218664	1.11071	0.1428	0.707337	0.905287
ENSMUSG00000026576	ENSMUSG00000026576	11931	Atp1b1	ATPase, Na+/K+ transporting, beta 1 polypeptide	0.235366	6.05901	4.85684	0.032751	0.261694
ENSMUSG00000032412	ENSMUSG00000032412	11933	Atp1b3	ATPase, Na+/K+ transporting, beta 3 polypeptide	-0.247114	4.56885	2.652	0.110476	0.453491
ENSMUSG00000025436	ENSMUSG00000025436	68876	Atp23	ATP23 metallopeptidase and ATP synthase assembly factor homolog	-0.358042	2.38397	1.82653	0.183364	0.554111
ENSMUSG00000029467	ENSMUSG00000029467	11938	Atp2a2	ATPase, Ca++ transporting, cardiac muscle, slow twitch 2	0.0129646	6.12838	0.00612494	0.93797	0.983004
ENSMUSG00000019943	ENSMUSG00000019943	67972	Atp2b1	ATPase, Ca++ transporting, plasma membrane 1	0.155934	6.23349	3.31603	0.0753305	0.38047
ENSMUSG00000030302	ENSMUSG00000030302	11941	Atp2b2	ATPase, Ca++ transporting, plasma membrane 2	-0.0448767	1.16918	0.0126657	0.9109	0.973931
ENSMUSG00000026463	ENSMUSG00000026463	381290	Atp2b4	ATPase, Ca++ transporting, plasma membrane 4	-0.115168	3.37965	0.28697	0.594835	0.852106
ENSMUSG00000032570	ENSMUSG00000032570	235574	Atp2c1	ATPase, Ca++-sequestering	-0.0885339	3.99906	0.241875	0.625271	0.865795
ENSMUSG00000025428	ENSMUSG00000025428	11946	Atp5a1	ATP synthase, H+ transporting, mitochondrial F1 complex, alpha subunit 1	-0.124554	9.21589	1.34681	0.252021	0.61597
ENSMUSG00000025393	ENSMUSG00000025393	11947	Atp5b	ATP synthase, H+ transporting mitochondrial F1 complex, beta subunit	-0.0514625	8.82279	0.271799	0.604711	0.857238
ENSMUSG00000025781	ENSMUSG00000025781	11949	Atp5c1	ATP synthase, H+ transporting, mitochondrial F1 complex, gamma polypeptide 1	0.0115332	8.06785	0.0100099	0.920754	0.978301
ENSMUSG00000003072	ENSMUSG00000003072	66043	Atp5d	ATP synthase, H+ transporting, mitochondrial F1 complex, delta subunit	-0.0210538	8.11481	0.0291802	0.865137	0.958878
ENSMUSG00000016252	ENSMUSG00000016252	67126	Atp5e	ATP synthase, H+ transporting, mitochondrial F1 complex, epsilon subunit	0.175557	7.603	2.06037	0.158161	0.521948
ENSMUSG00000000563	ENSMUSG00000000563	11950	Atp5f1	ATP synthase, H+ transporting, mitochondrial F0 complex, subunit B1	-0.0428941	8.31514	0.0841195	0.773137	0.927113
ENSMUSG00000006057	ENSMUSG00000006057	11951	Atp5g1	ATP synthase, H+ transporting, mitochondrial F0 complex, subunit C1 (subunit 9)	0.163934	8.10753	1.45122	0.234696	0.600581
ENSMUSG00000062683	ENSMUSG00000062683	67942	Atp5g2	ATP synthase, H+ transporting, mitochondrial F0 complex, subunit C2 (subunit 9)	-0.181183	7.93765	2.65848	0.110053	0.453449
ENSMUSG00000018770	ENSMUSG00000018770	228033	Atp5g3	ATP synthase, H+ transporting, mitochondrial F0 complex, subunit C3 (subunit 9)	-0.255937	10.0827	3.68062	0.0614734	0.346888
ENSMUSG00000034566	ENSMUSG00000034566	71679	Atp5h	ATP synthase, H+ transporting, mitochondrial F0 complex, subunit D	0.141565	8.40735	1.20962	0.277317	0.641077
ENSMUSG00000022890	ENSMUSG00000022890	11957	Atp5j	ATP synthase, H+ transporting, mitochondrial F0 complex, subunit F	-0.175278	8.01938	0.895664	0.349234	0.699312
ENSMUSG00000038690	ENSMUSG00000038690	57423	Atp5j2	ATP synthase, H+ transporting, mitochondrial F0 complex, subunit F2	0.147822	8.53397	1.10664	0.29849	0.660881
ENSMUSG00000050856	ENSMUSG00000050856	11958	Atp5k	ATP synthase, H+ transporting, mitochondrial F1F0 complex, subunit E	0.0697646	8.65338	0.289332	0.593327	0.851419
ENSMUSG00000038717	ENSMUSG00000038717	27425	Atp5l	ATP synthase, H+ transporting, mitochondrial F0 complex, subunit G	-0.160168	8.77675	2.24358	0.141226	0.498975
ENSMUSG00000071528	ENSMUSG00000071528	66477	Atp5md	ATP synthase membrane subunit DAPIT	-0.118937	7.9825	0.919082	0.342893	0.693585
ENSMUSG00000021290	ENSMUSG00000021290	70257	Atp5mpl	ATP synthase membrane subunit 6.8PL	-0.0813009	7.92534	0.447539	0.50696	0.80323
ENSMUSG00000022956	ENSMUSG00000022956	28080	Atp5o	ATP synthase, H+ transporting, mitochondrial F1 complex, O subunit	-0.0461363	8.14723	0.179272	0.674038	0.889102
ENSMUSG00000064357	ENSMUSG00000064357	17705	ATP6	ATP synthase F0 subunit 6	0.0282815	14.4722	0.0458106	0.831498	0.947141
ENSMUSG00000019087	ENSMUSG00000019087	54411	Atp6ap1	ATPase, H+ transporting, lysosomal accessory protein 1	0.0352117	6.02194	0.0388357	0.844685	0.950279
ENSMUSG00000031007	ENSMUSG00000031007	70495	Atp6ap2	ATPase, H+ transporting, lysosomal accessory protein 2	-0.300302	5.33104	7.87623	0.00740349	0.130404
ENSMUSG00000019302	ENSMUSG00000019302	11975	Atp6v0a1	ATPase, H+ transporting, lysosomal V0 subunit A1	-0.00891488	4.99896	0.00437277	0.947573	0.985005
ENSMUSG00000038023	ENSMUSG00000038023	21871	Atp6v0a2	ATPase, H+ transporting, lysosomal V0 subunit A2	-0.0922315	4.46864	0.523926	0.472958	0.787828
ENSMUSG00000033379	ENSMUSG00000033379	114143	Atp6v0b	ATPase, H+ transporting, lysosomal V0 subunit B	-0.064621	5.92141	0.193931	0.661795	0.883023
ENSMUSG00000024121	ENSMUSG00000024121	11984	Atp6v0c	ATPase, H+ transporting, lysosomal V0 subunit C	-0.0667846	8.02605	0.250805	0.618976	0.863017
ENSMUSG00000013160	ENSMUSG00000013160	11972	Atp6v0d1	ATPase, H+ transporting, lysosomal V0 subunit D1	0.0552037	5.03739	0.220649	0.640838	0.872893
ENSMUSG00000028238	ENSMUSG00000028238	242341	Atp6v0d2	ATPase, H+ transporting, lysosomal V0 subunit D2	0.131783	2.11285	0.0867336	0.769811	0.925166
ENSMUSG00000015575	ENSMUSG00000015575	11974	Atp6v0e	ATPase, H+ transporting, lysosomal V0 subunit E	-0.231553	6.08882	3.03629	0.088325	0.413888
ENSMUSG00000052459	ENSMUSG00000052459	11964	Atp6v1a	ATPase, H+ transporting, lysosomal V1 subunit A	-0.116056	6.55572	1.06909	0.306733	0.666566
ENSMUSG00000006273	ENSMUSG00000006273	11966	Atp6v1b2	ATPase, H+ transporting, lysosomal V1 subunit B2	-0.04793	5.56608	0.103344	0.749358	0.917508
ENSMUSG00000022295	ENSMUSG00000022295	66335	Atp6v1c1	ATPase, H+ transporting, lysosomal V1 subunit C1	0.033751	4.79865	0.086053	0.770619	0.925827
ENSMUSG00000021114	ENSMUSG00000021114	73834	Atp6v1d	ATPase, H+ transporting, lysosomal V1 subunit D	-0.0315463	6.11264	0.127467	0.72276	0.910011
ENSMUSG00000019210	ENSMUSG00000019210	11973	Atp6v1e1	ATPase, H+ transporting, lysosomal V1 subunit E1	-0.230096	7.10893	5.27576	0.0263828	0.23541
ENSMUSG00000004285	ENSMUSG00000004285	66144	Atp6v1f	ATPase, H+ transporting, lysosomal V1 subunit F	-0.052918	7.19037	0.160635	0.690489	0.89652
ENSMUSG00000039105	ENSMUSG00000039105	66290	Atp6v1g1	ATPase, H+ transporting, lysosomal V1 subunit G1	-0.137814	6.72853	1.43031	0.238043	0.604481
ENSMUSG00000024403	ENSMUSG00000024403	66237	Atp6v1g2	ATPase, H+ transporting, lysosomal V1 subunit G2	0.188584	1.21506	0.169051	0.682929	0.892797
ENSMUSG00000033793	ENSMUSG00000033793	108664	Atp6v1h	ATPase, H+ transporting, lysosomal V1 subunit H	-0.227656	4.84844	1.25422	0.268879	0.633594
ENSMUSG00000033792	ENSMUSG00000033792	11977	Atp7a	ATPase, Cu++ transporting, alpha polypeptide	-0.0834166	2.83058	0.114775	0.736365	0.914314
ENSMUSG00000006567	ENSMUSG00000006567	11979	Atp7b	ATPase, Cu++ transporting, beta polypeptide	-0.382453	3.86222	2.0271	0.161904	0.527973
ENSMUSG00000064356	ENSMUSG00000064356	17706	ATP8	ATP synthase F0 subunit 8	0.140654	8.30027	0.700044	0.407237	0.743814
ENSMUSG00000037685	ENSMUSG00000037685	11980	Atp8a1	ATPase, aminophospholipid transporter (APLT), class I, type 8A, member 1	-0.169024	2.63607	0.468742	0.497115	0.800097
ENSMUSG00000039529	ENSMUSG00000039529	54670	Atp8b1	ATPase, class I, type 8B, member 1	0.27072	4.92448	4.37094	0.0422964	0.293259
ENSMUSG00000060131	ENSMUSG00000060131	241633	Atp8b4	ATPase, class I, type 8B, member 4	-0.224548	0.995267	0.230064	0.633824	0.868788
ENSMUSG00000027546	ENSMUSG00000027546	11981	Atp9a	ATPase, class II, type 9A	-0.394586	6.33579	4.99965	0.0304874	0.252949
ENSMUSG00000024566	ENSMUSG00000024566	50771	Atp9b	ATPase, class II, type 9B	-0.0241418	4.58594	0.0337099	0.855159	0.954851
ENSMUSG00000028710	ENSMUSG00000028710	230649	Atpaf1	ATP synthase mitochondrial F1 complex assembly factor 1	-0.0537439	3.95614	0.114187	0.737014	0.914314
ENSMUSG00000042709	ENSMUSG00000042709	246782	Atpaf2	ATP synthase mitochondrial F1 complex assembly factor 2	0.0272723	2.62562	0.0131769	0.909127	0.973251
ENSMUSG00000054428	ENSMUSG00000054428	11983	Atpif1	ATPase inhibitory factor 1	-0.516962	5.35063	16.1188	0.000225312	0.017805
ENSMUSG00000039065	ENSMUSG00000039065	68073	Atpsckmt	ATP synthase C subunit lysine N-methyltransferase	-0.060673	3.7141	0.159385	0.691632	0.897462
ENSMUSG00000032409	ENSMUSG00000032409	245000	Atr	ataxia telangiectasia and Rad3 related	-0.0618711	3.48823	0.115581	0.735476	0.914119
ENSMUSG00000013622	ENSMUSG00000013622	381629	Atraid	all-trans retinoic acid induced differentiation factor	-0.000230036	6.65315	4.90879e-06	0.998242	0.999861
ENSMUSG00000025646	ENSMUSG00000025646	235610	Atrip	ATR interacting protein	0.437552	2.44329	2.95989	0.0922969	0.421832
ENSMUSG00000027312	ENSMUSG00000027312	11990	Atrn	attractin	0.0839535	4.91567	0.145584	0.704708	0.904073
ENSMUSG00000054843	ENSMUSG00000054843	226255	Atrnl1	attractin like 1	0.0225412	3.37298	0.0150017	0.903069	0.971172
ENSMUSG00000031229	ENSMUSG00000031229	22589	Atrx	ATRX, chromatin remodeler	0.242404	6.45679	2.95821	0.0923865	0.421832
ENSMUSG00000046876	ENSMUSG00000046876	20238	Atxn1	ataxin 1	0.468932	4.69306	7.25442	0.00993429	0.149934
ENSMUSG00000016541	ENSMUSG00000016541	54138	Atxn10	ataxin 10	-0.00754739	5.68349	0.00223981	0.962464	0.989466
ENSMUSG00000069895	ENSMUSG00000069895	52335	Atxn1l	ataxin 1-like	-0.301837	2.71312	1.651	0.205466	0.57714
ENSMUSG00000042605	ENSMUSG00000042605	20239	Atxn2	ataxin 2	0.164371	6.87655	1.7933	0.18732	0.557325
ENSMUSG00000032637	ENSMUSG00000032637	233871	Atxn2l	ataxin 2-like	0.218761	3.36071	1.07742	0.30488	0.66499
ENSMUSG00000021189	ENSMUSG00000021189	110616	Atxn3	ataxin 3	-0.0707178	3.78251	0.1921	0.663294	0.883926
ENSMUSG00000021738	ENSMUSG00000021738	246103	Atxn7	ataxin 7	0.10903	4.91978	0.709737	0.404034	0.742833
ENSMUSG00000020564	ENSMUSG00000020564	380753	Atxn7l1	ataxin 7-like 1	0.432267	3.32343	5.51128	0.0234004	0.222934
ENSMUSG00000059995	ENSMUSG00000059995	217218	Atxn7l3	ataxin 7-like 3	0.213493	4.96333	1.12998	0.293633	0.656796
ENSMUSG00000074748	ENSMUSG00000074748	382423	Atxn7l3b	ataxin 7-like 3B	0.0398381	8.13254	0.0762757	0.783687	0.931287
ENSMUSG00000078584	ENSMUSG00000078584	230696	AU022252	expressed sequence AU022252	0.312751	5.76632	6.01078	0.0182085	0.197554
ENSMUSG00000028830	ENSMUSG00000028830	100317	AU040320	expressed sequence AU040320	-0.0385694	4.41683	0.0962377	0.75784	0.920951
ENSMUSG00000078435	ENSMUSG00000078435	216177	AU041133	expressed sequence AU041133	0.985778	0.940614	6.2386	0.0162644	0.189093
ENSMUSG00000021460	ENSMUSG00000021460	11992	Auh	AU RNA binding protein/enoyl-coenzyme A hydratase	-0.0908428	5.28861	0.778181	0.382436	0.728757
ENSMUSG00000068328	ENSMUSG00000068328	11993	Aup1	ancient ubiquitous protein 1	0.202728	6.57992	2.09038	0.155231	0.51812
ENSMUSG00000027496	ENSMUSG00000027496	20878	Aurka	aurora kinase A	-1.82391	0.770487	10.0759	0.00272429	0.076945
ENSMUSG00000065990	ENSMUSG00000065990	66077	Aurkaip1	aurora kinase A interacting protein 1	0.0429216	5.63292	0.129405	0.720751	0.909475
ENSMUSG00000029673	ENSMUSG00000029673	319974	Auts2	autism susceptibility candidate 2	0.249271	1.52047	0.363597	0.549574	0.826435
ENSMUSG00000003604	ENSMUSG00000003604	74268	Aven	apoptosis, caspase activation inhibitor	0.209036	4.03256	1.80165	0.186318	0.556284
ENSMUSG00000029787	ENSMUSG00000029787	78937	Avl9	AVL9 cell migration associated	0.210339	4.25293	1.27583	0.264724	0.627053
ENSMUSG00000018821	ENSMUSG00000018821	69534	Avpi1	arginine vasopressin-induced 1	-0.0588531	4.87519	0.120408	0.730227	0.912021
ENSMUSG00000020123	ENSMUSG00000020123	54140	Avpr1a	arginine vasopressin receptor 1A	1.56048	3.19318	18.3885	0.000109247	0.0124273
ENSMUSG00000075010	ENSMUSG00000075010	107350	AW112010	expressed sequence AW112010	-0.127492	6.73777	0.400434	0.530321	0.815304
ENSMUSG00000074166	ENSMUSG00000074166	101835	AW146154	expressed sequence AW146154	0.347815	3.31569	2.6447	0.110953	0.454497
ENSMUSG00000039182	ENSMUSG00000039182	105351	AW209491	expressed sequence AW209491	-0.0920279	3.59242	0.236425	0.629184	0.867337
ENSMUSG00000087516	ENSMUSG00000087516	100993	AW549542	expressed sequence AW549542	0.438116	3.25756	1.61845	0.210547	0.580165
ENSMUSG00000041935	ENSMUSG00000041935	106064	AW549877	expressed sequence AW549877	-0.0545696	3.87683	0.0628864	0.803144	0.936018
ENSMUSG00000033632	ENSMUSG00000033632	225289	AW554918	expressed sequence AW554918	-0.0243747	2.21956	0.00507787	0.943511	0.983955
ENSMUSG00000024182	ENSMUSG00000024182	12005	Axin1	axin 1	0.335992	3.55142	4.1924	0.0465323	0.306638
ENSMUSG00000000142	ENSMUSG00000000142	12006	Axin2	axin 2	-0.457816	2.26976	2.2151	0.143715	0.502605
ENSMUSG00000002602	ENSMUSG00000002602	26362	Axl	AXL receptor tyrosine kinase	-0.574858	4.50303	6.09289	0.0176769	0.196104
ENSMUSG00000037053	ENSMUSG00000037053	12007	Azgp1	alpha-2-glycoprotein 1, zinc	0.32231	9.86599	6.58382	0.0137299	0.176521
ENSMUSG00000039285	ENSMUSG00000039285	27215	Azi2	5-azacytidine induced gene 2	-0.0263237	4.5088	0.0260418	0.872528	0.96172
ENSMUSG00000037458	ENSMUSG00000037458	54375	Azin1	antizyme inhibitor 1	0.0474205	5.86024	0.111859	0.739607	0.915626
ENSMUSG00000060802	ENSMUSG00000060802	12010	B2m	beta-2 microglobulin	-0.0465895	11.6409	0.0985491	0.755044	0.919969
ENSMUSG00000039242	ENSMUSG00000039242	97884	B3galnt2	UDP-GalNAc:betaGlcNAc beta 1,3-galactosaminyltransferase, polypeptide 2	0.0266774	2.63276	0.00459385	0.946289	0.984437
ENSMUSG00000034780	ENSMUSG00000034780	26877	B3galt1	UDP-Gal:betaGlcNAc beta 1,3-galactosyltransferase, polypeptide 1	0.229548	3.37498	1.26995	0.265812	0.628622
ENSMUSG00000050796	ENSMUSG00000050796	117592	B3galt6	UDP-Gal:betaGal beta 1,3-galactosyltransferase, polypeptide 6	0.40763	1.4459	1.0677	0.307045	0.666688
ENSMUSG00000071649	ENSMUSG00000071649	72727	B3gat3	beta-1,3-glucuronyltransferase 3 (glucuronosyltransferase I)	0.209509	3.83126	1.62217	0.209397	0.579187
ENSMUSG00000051950	ENSMUSG00000051950	381694	B3glct	beta-3-glucosyltransferase	-0.177451	1.75192	0.38303	0.53914	0.819562
ENSMUSG00000006731	ENSMUSG00000006731	14421	B4galnt1	beta-1,4-N-acetyl-galactosaminyl transferase 1	0.165323	5.44616	1.12381	0.294816	0.657466
ENSMUSG00000028413	ENSMUSG00000028413	14595	B4galt1	UDP-Gal:betaGlcNAc beta 1,4- galactosyltransferase, polypeptide 1	0.229419	5.45237	1.88638	0.176487	0.547693
ENSMUSG00000052423	ENSMUSG00000052423	57370	B4galt3	UDP-Gal:betaGlcNAc beta 1,4-galactosyltransferase, polypeptide 3	0.252656	3.35545	1.49693	0.22758	0.595426
ENSMUSG00000017929	ENSMUSG00000017929	56336	B4galt5	UDP-Gal:betaGlcNAc beta 1,4-galactosyltransferase, polypeptide 5	-0.78301	4.12677	10.7659	0.00205367	0.0654692
ENSMUSG00000056124	ENSMUSG00000056124	56386	B4galt6	UDP-Gal:betaGlcNAc beta 1,4-galactosyltransferase, polypeptide 6	-0.386754	1.39763	0.62253	0.43429	0.764243
ENSMUSG00000021504	ENSMUSG00000021504	218271	B4galt7	xylosylprotein beta1,4-galactosyltransferase, polypeptide 7 (galactosyltransferase I)	0.0870333	2.4116	0.123397	0.727036	0.911523
ENSMUSG00000063439	ENSMUSG00000063439	232987	B9d2	B9 protein domain 2	0.393051	2.04794	1.69485	0.199658	0.571055
ENSMUSG00000039653	ENSMUSG00000039653	12012	Baat	bile acid-Coenzyme A: amino acid N-acyltransferase	0.143324	7.05958	1.03311	0.314921	0.672342
ENSMUSG00000031820	ENSMUSG00000031820	68251	Babam1	BRISC and BRCA1 A complex member 1	-0.0185667	5.16316	0.0277633	0.868421	0.960083
ENSMUSG00000052139	ENSMUSG00000052139	107976	Babam2	BRISC and BRCA1 A complex member 2	0.0282227	4.67069	0.0271455	0.869879	0.960966
ENSMUSG00000032086	ENSMUSG00000032086	23821	Bace1	beta-site APP cleaving enzyme 1	0.192226	5.06517	2.40643	0.127917	0.480264
ENSMUSG00000040605	ENSMUSG00000040605	56175	Bace2	beta-site APP-cleaving enzyme 2	-0.0719623	2.92353	0.12341	0.727022	0.911523
ENSMUSG00000025612	ENSMUSG00000025612	12013	Bach1	BTB and CNC homology 1, basic leucine zipper transcription factor 1	0.376023	4.22505	4.82237	0.0333445	0.26273
ENSMUSG00000040270	ENSMUSG00000040270	12014	Bach2	BTB and CNC homology, basic leucine zipper transcription factor 2	0.478186	3.82093	4.63922	0.0367004	0.27635
ENSMUSG00000024959	ENSMUSG00000024959	12015	Bad	BCL2-associated agonist of cell death	0.223871	4.8162	2.20988	0.144177	0.503565
ENSMUSG00000028416	ENSMUSG00000028416	12017	Bag1	BCL2-associated athanogene 1	0.0969093	5.52355	0.270891	0.605353	0.857358
ENSMUSG00000030847	ENSMUSG00000030847	29810	Bag3	BCL2-associated athanogene 3	-0.154902	4.13414	0.822908	0.369215	0.717277
ENSMUSG00000037316	ENSMUSG00000037316	67384	Bag4	BCL2-associated athanogene 4	0.160879	5.59342	2.12355	0.152067	0.514483
ENSMUSG00000049792	ENSMUSG00000049792	70369	Bag5	BCL2-associated athanogene 5	0.200969	3.32816	1.29124	0.261897	0.62367
ENSMUSG00000024392	ENSMUSG00000024392	224727	Bag6	BCL2-associated athanogene 6	0.150675	5.08932	1.14265	0.290853	0.653922
ENSMUSG00000039741	ENSMUSG00000039741	268515	Bahcc1	BAH domain and coiled-coil containing 1	-0.130283	1.51403	0.135053	0.71499	0.908298
ENSMUSG00000040007	ENSMUSG00000040007	228536	Bahd1	bromo adjacent homology domain containing 1	-0.227776	2.46297	0.63895	0.428335	0.759735
ENSMUSG00000025372	ENSMUSG00000025372	108100	Baiap2	brain-specific angiogenesis inhibitor 1-associated protein 2	0.124775	4.9996	0.746631	0.392176	0.733755
ENSMUSG00000038859	ENSMUSG00000038859	66898	Baiap2l1	BAI1-associated protein 2-like 1	-0.148188	4.55985	1.0193	0.318141	0.675516
ENSMUSG00000057789	ENSMUSG00000057789	12018	Bak1	BCL2-antagonist/killer 1	0.166835	2.24703	0.302974	0.584775	0.84647
ENSMUSG00000024232	ENSMUSG00000024232	68010	Bambi	BMP and activin membrane-bound inhibitor	-0.603183	2.00963	1.55151	0.219825	0.587475
ENSMUSG00000024844	ENSMUSG00000024844	23825	Banf1	barrier to autointegration factor 1	-0.155427	5.54467	1.14834	0.28967	0.652667
ENSMUSG00000037922	ENSMUSG00000037922	242248	Bank1	B cell scaffold protein with ankyrin repeats 1	-0.297035	1.8189	0.898784	0.348225	0.698255
ENSMUSG00000025316	ENSMUSG00000025316	53325	Banp	BTG3 associated nuclear protein	0.453731	4.12434	9.80424	0.00307272	0.0824577
ENSMUSG00000021901	ENSMUSG00000021901	104416	Bap1	Brca1 associated protein 1	0.149842	3.43659	0.645476	0.426003	0.757972
ENSMUSG00000045763	ENSMUSG00000045763	70350	Basp1	brain abundant, membrane attached signal protein 1	-0.603241	3.1064	3.73975	0.0597358	0.341924
ENSMUSG00000003873	ENSMUSG00000003873	12028	Bax	BCL2-associated X protein	-0.0210179	1.59859	0.00403705	0.949623	0.985713
ENSMUSG00000035021	ENSMUSG00000035021	217578	Baz1a	bromodomain adjacent to zinc finger domain 1A	0.0577578	4.62582	0.174683	0.677992	0.890393
ENSMUSG00000002748	ENSMUSG00000002748	22385	Baz1b	bromodomain adjacent to zinc finger domain, 1B	0.239594	5.75291	2.19571	0.145438	0.505037
ENSMUSG00000040054	ENSMUSG00000040054	116848	Baz2a	bromodomain adjacent to zinc finger domain, 2A	0.262764	5.04707	2.37508	0.130362	0.483299
ENSMUSG00000026987	ENSMUSG00000026987	407823	Baz2b	bromodomain adjacent to zinc finger domain, 2B	0.0673651	5.36149	0.251394	0.618565	0.863017
ENSMUSG00000002083	ENSMUSG00000002083	170770	Bbc3	BCL2 binding component 3	-0.0719007	3.68171	0.108957	0.742882	0.917359
ENSMUSG00000084957	ENSMUSG00000084957	100503572	Bbip1	BBSome interacting protein 1	0.0576781	4.67505	0.191655	0.663659	0.883938
ENSMUSG00000041660	ENSMUSG00000041660	170442	Bbox1	butyrobetaine (gamma), 2-oxoglutarate dioxygenase 1 (gamma-butyrobetaine hydroxylase)	-0.127839	7.38417	0.446952	0.507416	0.803403
ENSMUSG00000035759	ENSMUSG00000035759	71769	Bbs10	Bardet-Biedl syndrome 10 (human)	-0.519813	2.32986	2.97855	0.0913091	0.420612
ENSMUSG00000031755	ENSMUSG00000031755	67378	Bbs2	Bardet-Biedl syndrome 2 (human)	-0.664312	0.72925	2.46296	0.123639	0.474711
ENSMUSG00000025235	ENSMUSG00000025235	102774	Bbs4	Bardet-Biedl syndrome 4 (human)	0.676416	1.81914	5.307	0.0259646	0.233812
ENSMUSG00000037325	ENSMUSG00000037325	71492	Bbs7	Bardet-Biedl syndrome 7 (human)	-0.340998	0.859381	0.406503	0.527015	0.813119
ENSMUSG00000035919	ENSMUSG00000035919	319845	Bbs9	Bardet-Biedl syndrome 9 (human)	-0.028904	1.50014	0.00642599	0.936467	0.982985
ENSMUSG00000022641	ENSMUSG00000022641	70508	Bbx	bobby sox HMG box containing	0.125751	4.32526	0.495266	0.485252	0.79351
ENSMUSG00000115783	ENSMUSG00000115783	100568459	Bc1	brain cytoplasmic RNA 1	0.400749	1.85885	1.21083	0.277082	0.640894
ENSMUSG00000020650	ENSMUSG00000020650	12033	Bcap29	B cell receptor associated protein 29	-0.0765937	2.91139	0.144245	0.705903	0.904397
ENSMUSG00000002015	ENSMUSG00000002015	27061	Bcap31	B cell receptor associated protein 31	-0.0606036	6.78903	0.520035	0.474596	0.787828
ENSMUSG00000031955	ENSMUSG00000031955	12927	Bcar1	breast cancer anti-estrogen resistance 1	-0.138291	5.0861	0.378016	0.542014	0.821379
ENSMUSG00000028121	ENSMUSG00000028121	29815	Bcar3	breast cancer anti-estrogen resistance 3	0.0721998	4.46528	0.0874602	0.7689	0.925166
ENSMUSG00000005687	ENSMUSG00000005687	68183	Bcas2	breast carcinoma amplified sequence 2	0.00707709	4.22513	0.0017881	0.96646	0.990672
ENSMUSG00000059439	ENSMUSG00000059439	192197	Bcas3	breast carcinoma amplified sequence 3	0.0493389	4.11621	0.0504432	0.823331	0.943686
ENSMUSG00000030826	ENSMUSG00000030826	12036	Bcat2	branched chain aminotransferase 2, mitochondrial	0.317646	2.53464	1.55308	0.219197	0.586781
ENSMUSG00000030983	ENSMUSG00000030983	66165	Bccip	BRCA2 and CDKN1A interacting protein	-0.0758134	4.64556	0.104673	0.747899	0.917508
ENSMUSG00000037525	ENSMUSG00000037525	75284	Bcdin3d	BCDIN3 domain containing	-0.201301	2.2592	0.654791	0.422708	0.754605
ENSMUSG00000027792	ENSMUSG00000027792	12038	Bche	butyrylcholinesterase	-0.312365	6.11127	7.7682	0.00778844	0.134098
ENSMUSG00000060376	ENSMUSG00000060376	12039	Bckdha	branched chain ketoacid dehydrogenase E1, alpha polypeptide	0.0874788	6.63568	0.425137	0.517736	0.807678
ENSMUSG00000032263	ENSMUSG00000032263	12040	Bckdhb	branched chain ketoacid dehydrogenase E1, beta polypeptide	0.0226763	5.82332	0.0266702	0.871013	0.961355
ENSMUSG00000030802	ENSMUSG00000030802	12041	Bckdk	branched chain ketoacid dehydrogenase kinase	0.074134	3.37739	0.171121	0.681103	0.891784
ENSMUSG00000028191	ENSMUSG00000028191	12042	Bcl10	B cell leukemia/lymphoma 10	-0.390996	4.20099	2.96172	0.0923789	0.421832
ENSMUSG00000057329	ENSMUSG00000057329	12043	Bcl2	B cell leukemia/lymphoma 2	-0.349212	2.36199	1.65176	0.205364	0.57714
ENSMUSG00000089929	ENSMUSG00000089929	12045	Bcl2a1b	B cell leukemia/lymphoma 2 related protein A1b	-0.944071	1.81176	3.12689	0.08423	0.404462
ENSMUSG00000099974	ENSMUSG00000099974	12047	Bcl2a1d	B cell leukemia/lymphoma 2 related protein A1d	-1.08796	1.81808	4.84139	0.0331633	0.262404
ENSMUSG00000007659	ENSMUSG00000007659	12048	Bcl2l1	BCL2-like 1	0.00375388	4.48619	0.000450008	0.98317	0.995215
ENSMUSG00000027381	ENSMUSG00000027381	12125	Bcl2l11	BCL2-like 11 (apoptosis facilitator)	-0.279349	3.41673	1.78711	0.188069	0.557557
ENSMUSG00000003190	ENSMUSG00000003190	75736	Bcl2l12	BCL2-like 12 (proline rich)	0.00443943	1.90891	0.000185221	0.989202	0.997562
ENSMUSG00000009112	ENSMUSG00000009112	94044	Bcl2l13	BCL2-like 13 (apoptosis facilitator)	0.0705255	5.05361	0.430444	0.515147	0.806914
ENSMUSG00000030200	ENSMUSG00000030200	66813	Bcl2l14	BCL2-like 14 (apoptosis facilitator)	-1.06114	0.615766	4.47642	0.0399926	0.285988
ENSMUSG00000089682	ENSMUSG00000089682	12050	Bcl2l2	BCL2-like 2	0.187533	2.11276	0.465547	0.498577	0.800757
ENSMUSG00000053175	ENSMUSG00000053175	12051	Bcl3	B cell leukemia/lymphoma 3	0.174842	3.91169	0.667879	0.418143	0.752197
ENSMUSG00000022508	ENSMUSG00000022508	12053	Bcl6	B cell leukemia/lymphoma 6	0.259957	5.10399	0.323787	0.572879	0.840453
ENSMUSG00000000317	ENSMUSG00000000317	12029	Bcl6b	B cell CLL/lymphoma 6, member B	-0.155754	1.03852	0.185228	0.668995	0.886392
ENSMUSG00000029438	ENSMUSG00000029438	77045	Bcl7a	B cell CLL/lymphoma 7A	0.334362	3.17326	2.07478	0.156746	0.519919
ENSMUSG00000029681	ENSMUSG00000029681	12054	Bcl7b	B cell CLL/lymphoma 7B	-0.253549	3.30169	1.50982	0.225621	0.593082
ENSMUSG00000030814	ENSMUSG00000030814	12055	Bcl7c	B cell CLL/lymphoma 7C	0.114314	4.73725	0.447163	0.507137	0.80323
ENSMUSG00000038256	ENSMUSG00000038256	77578	Bcl9	B cell CLL/lymphoma 9	0.432634	2.72449	5.14186	0.028259	0.243438
ENSMUSG00000063382	ENSMUSG00000063382	80288	Bcl9l	B cell CLL/lymphoma 9-like	0.374552	5.86069	5.83097	0.0199187	0.206032
ENSMUSG00000037608	ENSMUSG00000037608	72567	Bclaf1	BCL2-associated transcription factor 1	0.358468	6.2769	8.06114	0.00679068	0.123437
ENSMUSG00000044150	ENSMUSG00000044150	382252	Bclaf3	Bclaf1 and Thrap3 family member 3	0.0293358	1.86484	0.00562998	0.940524	0.983004
ENSMUSG00000031845	ENSMUSG00000031845	63857	Bco1	beta-carotene oxygenase 1	-0.471712	2.52362	3.52651	0.0669532	0.359299
ENSMUSG00000032066	ENSMUSG00000032066	170752	Bco2	beta-carotene oxygenase 2	-0.0756356	3.96492	0.174064	0.67853	0.890772
ENSMUSG00000040363	ENSMUSG00000040363	71458	Bcor	BCL6 interacting corepressor	0.0461833	2.94568	0.0330123	0.856648	0.955129
ENSMUSG00000036959	ENSMUSG00000036959	320376	Bcorl1	BCL6 co-repressor-like 1	0.31339	3.92435	2.40567	0.127975	0.480264
ENSMUSG00000009681	ENSMUSG00000009681	110279	Bcr	breakpoint cluster region	0.180952	4.54381	1.36972	0.248087	0.613574
ENSMUSG00000026172	ENSMUSG00000026172	66821	Bcs1l	BCS1-like (yeast)	-0.0351095	3.48735	0.0423009	0.837985	0.947978
ENSMUSG00000046598	ENSMUSG00000046598	71911	Bdh1	3-hydroxybutyrate dehydrogenase, type 1	-0.204333	8.30521	3.84901	0.0560446	0.333202
ENSMUSG00000028167	ENSMUSG00000028167	69772	Bdh2	3-hydroxybutyrate dehydrogenase, type 2	0.155447	4.00071	0.669412	0.417614	0.751495
ENSMUSG00000048482	ENSMUSG00000048482	12064	Bdnf	brain derived neurotrophic factor	-0.302171	1.65506	1.03202	0.315172	0.672345
ENSMUSG00000049658	ENSMUSG00000049658	544971	Bdp1	B double prime 1, subunit of RNA polymerase III transcription initiation factor IIIB	0.473807	4.50688	8.84875	0.00472376	0.100658
ENSMUSG00000035086	ENSMUSG00000035086	56208	Becn1	beclin 1, autophagy related	-0.0757614	5.38708	0.595302	0.444452	0.771264
ENSMUSG00000038214	ENSMUSG00000038214	331623	Bend3	BEN domain containing 3	-0.091704	1.03057	0.021906	0.883028	0.965557
ENSMUSG00000048186	ENSMUSG00000048186	209645	Bend7	BEN domain containing 7	0.488775	3.68675	6.3663	0.0152729	0.185175
ENSMUSG00000032757	ENSMUSG00000032757	12068	Bet1	Bet1 golgi vesicular membrane trafficking protein	-0.239323	4.87462	0.91699	0.343959	0.694732
ENSMUSG00000025484	ENSMUSG00000025484	54399	Bet1l	Bet1 golgi vesicular membrane trafficking protein like	-0.131682	5.90194	0.968246	0.330435	0.682111
ENSMUSG00000079737	ENSMUSG00000079737	67118	Bfar	bifunctional apoptosis regulator	-0.319734	1.10971	0.457474	0.502305	0.801655
ENSMUSG00000022684	ENSMUSG00000022684	67118	Bfar	bifunctional apoptosis regulator	-0.0717928	5.96776	0.336375	0.564853	0.834518
ENSMUSG00000031375	ENSMUSG00000031375	12111	Bgn	biglycan	-0.14189	6.22051	0.288482	0.594298	0.851903
ENSMUSG00000072964	ENSMUSG00000072964	70237	Bhlhb9	basic helix-loop-helix domain containing, class B9	-0.61981	1.36372	2.88163	0.0965751	0.429304
ENSMUSG00000030103	ENSMUSG00000030103	20893	Bhlhe40	basic helix-loop-helix family, member e40	-0.380405	5.36903	2.8817	0.0971171	0.430036
ENSMUSG00000030256	ENSMUSG00000030256	79362	Bhlhe41	basic helix-loop-helix family, member e41	0.146039	2.22207	0.0943421	0.760283	0.921807
ENSMUSG00000074768	ENSMUSG00000074768	12116	Bhmt	betaine-homocysteine methyltransferase	0.407875	11.4081	9.42329	0.00364272	0.0873685
ENSMUSG00000042118	ENSMUSG00000042118	64918	Bhmt2	betaine-homocysteine methyltransferase 2	-0.0399569	7.31887	0.0625121	0.803719	0.936019
ENSMUSG00000014329	ENSMUSG00000014329	83675	Bicc1	BicC family RNA binding protein 1	-0.303902	3.81118	0.658831	0.422004	0.753975
ENSMUSG00000037933	ENSMUSG00000037933	76895	Bicd2	BICD cargo adaptor 2	0.311632	3.2234	2.79707	0.10145	0.438199
ENSMUSG00000070808	ENSMUSG00000070808	243842	Bicra	BRD4 interacting chromatin remodeling complex associated protein	-0.244197	1.09734	0.313594	0.57829	0.844053
ENSMUSG00000036568	ENSMUSG00000036568	210982	Bicral	BRD4 interacting chromatin remodeling complex associated protein like	0.270859	3.68418	3.82154	0.0568931	0.336019
ENSMUSG00000004446	ENSMUSG00000004446	12122	Bid	BH3 interacting domain death agonist	-0.259511	3.85234	0.809888	0.373408	0.721545
ENSMUSG00000016758	ENSMUSG00000016758	12124	Bik	BCL2-interacting killer	-0.137478	2.51611	0.300072	0.586573	0.84753
ENSMUSG00000024381	ENSMUSG00000024381	30948	Bin1	bridging integrator 1	-0.40561	3.31476	4.5363	0.0387458	0.281479
[truncated: 9,752 more rows]

## Sheet: TXNvs.LFD
	gene.id	entrez	symbol	gene.name	logFC	logCPM	F	PValue	FDR
[truncated: 10,761 more rows]

[truncated: 2 more sheets: HXNvs.HFD, TXNvs.HXN]
